# Supplementary material for: Dynamic Evolution of Avian RNA Virus Sensors: Repeated Loss of RIG-I and RIPLET
Source: MDPI journal article supplement (doi:10.3390/v15010003), 2022-12-20
Supplement: s1 [file s1]

>accipiter\_nisus-mda5

ATGGCAGCGGAGTGCCGAGACGAGCGCTTCCTCTACATGATCTCCTGCTTCAGGCCGCGG  
CTGAGGCAGGTCATCCGCGTGCAGCCGGTGCTGGACCGGCTTCCCTCGCTGAGCGCGGC  
GGAGAGGGAGAAGGTGCGGGCGGCCGCCCTGCAGCGGGGCGAGGTGGAGGGGGCGGA  
GGAGCTGCTGCGGGCCGTGGAGCGGGGGCCCCGCGGGTGCGGCTGGTTCCACGAGTTC  
CTGCAGGCGCTGGAGCACGGCGGCTGCAGCCTGGCCGCTGCTACGTGAACCCAGCCT  
CAGCCAGCTGCCCTCGCCGGCCGAGGAGGCCGACCACGACCTCTGCGTGCACCTGGTGC  
AGCTGCTCCACGGCACGCTGGTGGATAAAATGCAGACCATGCAGGTGGCCGAGAAGTGCT  
TGCAGATGGGCATCTTCCAGGACGAGGACCTGGACCGGATCCACACTGTTACTGACAATC  
GTGGGAACAGAGATGGTGCAAGGGAGCTACTGAGCAGAATAGTGCATAAGAAAGATTGGT  
TCTCTCCTTTTTGATTGCTCTGCGTGAAACCCAACATGGAGGCCTTGAGATGATTTAAGC  
GGAAATACAGGAGGAACAGAGAATAGACAAAATGGGATGAAGAACAGCACAAATGAAGAA  
ACAGAAGTTACAAGCCAACCAGGATATGCCGTAGTGGAGGATTTGAAACAGCAAGAAAAC  
GTGAATGAAAGTTTCAGCAGTGAGAACAGTGTATTGGAAGCATGTATTGGAAGAATTCTG  
TAGTTTCAGAGTCAGATGTCTCCATAGGAGATAGAAGTGTGAGTAACATGAATGAAAACCTA  
GGACAGAGCTGCACAACCAGTGATTGAGATGAAGATGAAATGGAAAGCAGAGCTTCACCT  
GAGCCAGATCTGATCCTGAGAGATTACCAGATGGAAGTTGCAAAGCCAGCACTGAATGGG  
GAGAATATTATAATATGTCTCCCTACAGGCAGTGGTAAAACCAGAGTGGCTGTTTACATTAC  
CAAAGATCATTGAGATAAGAAGAAAAGAGCATCAGAGCCCGGAAAAGTTATAGTACTTGT  
AATAAGGTACCATTGGTAGAGCAGCATTTACGAAAGGAGTTTAATCCATTCTGAAGCGTT  
GGTATCAGGTTATTGGTTTAAGTGGCGATTCTCAGCTAAAAATCTCATTTCTGAAGTTGTC  
AGAAGAAATGATGTATCATCAGTACAGCGCAGATCCTTGAGAATTCATTGTTAAATGCAGC  
TAAAGAAGATGAAGAAGGTGTCCAGTTATCAGATTTTTCACTCATCATTATCGATGAGTGTC  
ATCACACTCAAAGGAAGGTGTCTACAACAATATAATGCGACGTTACTTAAAAGAAAAGATG  
AAGAACAAGAAGCTGGCAAAAGAAAACAAACCACTGATCCACAGCCTCAGATTCTGGGAC  
TTACAGCCTCACCTGGTGTAGGAGGTGCAACATCCTACTCAAAGCTGAAGAACATATTCT  
GAAAATCTGTGCCAATCTTGATGCATGTAGAATCATGACTGTTGAAGAGCATGCCTCCCAA  
CTGAACAATCAGGTGAAAGAACCATATAAGAAGACTGTGATTGCAGATGACAAAAGAAGGG  
ATCCATTTAGAGAGAGAATTACTGAGATCATGACAGACATTCAAACCTATTGCCAGCTCCAT  
CCAAAATCTGAGTTTGGAAGTACGCCATATGAACAGTGGGTGATTAGAGAAGAGAGAAGAG  
CTGCAAAAGAAGAAAAACGCAAGGAACGTGTGTGTGCAGAACACTTGAAGAAATACAATGA  
TGCTCTCCAGATAAATGACACCATCCGAATGGTGGATGCGTACAATCACCTAAATAACTTTT  
ATAAGGAGGAGAAAAAGTAAGAAGACAGTAAGGAGTGATGATGATGATGAACCAGCAG  
TATCAAAGCAAGATGAAACAGATGAATTTCTAATAGCTTTATTTTCATGCAAAAAGAAACAG  
CTGAAAGAGTTGGCTAGAAAGCCAGAATATGAAAATGAGAAGCTAATACAGTTGCGAAACA  
CTTTAATGGAGGAGTTCACGAAGACTGAAGAACCTAGAGGAATTATTTTCACAAAGACTCG  
GCTAAGTGCCCTTGCTTTATTCCAGTGGATTAAGGATAACCCAAAATTTGAAGAAGTGGGAA  
TTAAGGCCCATTTATCTTATCGGTGCTGGACATAACAGTGAAATTAACCCATGACTCAGAAT  
GAGCAAAGGGAAGTTATTGATAAATTCCGAAGTGGAAATGTAAATTTACTTATTGCTACTAC  
TGTAGCTGAGGAAGGCCTAGACATCAAAGAATGTAACATCGTTATTCGCTATGGCCTCGTC  
ACCAATGAAATTGCTATGGTGCAGGCTCGTGGTGCAGCTCGAGCTGATGAGAGCACCTAT  
GCACTTGTGGCTTCGAGTGGCTCAGGAGCTGTTGAACGCGAAGATGTTAATATTTCCGTG  
AGAAAATGATGTATAAGGCCATTGACGCTGTCCAAAAGATGCCACAGGAAGAGTATTTAA  
TAAGATTCAGAATTTCCAGTTGCAAAGTATAGTGGA AAAACAAATGAAGGCAAAGAGAGAT

CAGTGCAAGACATACAACAAAAATCCTTCACTAATAACATTCCCTATGCAAAAATTGCCACAA  
GCTGGTATGTTCTGGAGAAGACATACAGGTTATTGAAAACATGCATCATGTCAGTGTGAAA  
AAAGATTTCCAAGGTCTTTACCATACAAGAGAAAAATAAGACACTGCAAGATAAGCATGCCG  
ATTACCAGATAAATGGGGAAATTATATGTAAAGATTGTGGACAAGCTTGGGGAAATATGATG  
GTTACCCGAGGTCTTGACCTGCCTTGTCTAAAGATTAGAAATTTTGTGGTTGTGTTTGAAGA  
CAAGAAAACAACAAAGCAAATGTTTAAGAAATGGGGGAGAACTGCCTGTCAGGTTCCCTAAT  
TTTGATTATGCAGCTCATTGTCCTTCAAGTGATGAAGATTAA

>acridotheres\_javanicus-mda5

ATGGCAGAGGGCACCCGGGACGAGCTGTTCTCTACATGATCTCCTGCTTCAGGCCGCGG  
CTGAAGCGGTTTCATCCAGGTGCAGCCCGTGCTGGACCGGCTGCCGGCGCTGAGCGCGGA  
GGACAGGGACAGGGTGCGAGCGGCCGCCAGCAGCGGGGCGCGGCGGGCGGCCGCGGA  
GGAGCTGCTGCGGGCCGTGGAGCGGGGGCCCCGCGGCTGCGGCTGGATCCGCGAGTTC  
CTGCAGGCGCTGGAGCAGGGCGGCTGCGGCCTGGCCGCCTGCTACGCCAACCCAGCC  
TGAGCCAGCTGCCCTCGCCGGCAGAGGAGGCCGAGCACGACCTGTGCGTGCAGCTGGTG  
CAGCTGCTGCACGGCACGCTGGTGGACAGGATGCGCGCCGTGCCGGTGGCCGAGAAGT  
GCCTGGAGATGGGAATCTTCCAGGACGAGGACATGGATCGGATCCAGACAGTTACTGACA  
ATCATGGGAACAGAGATGGTGCAAGGGAGCTACTGAGCAGAATAGTCCAGAAGAAAGATT  
GGTTCTCTTCTTTCTTGGTTGCTCTCCGTGAAACCCAACATGAAGACCTTGCATATGATTTA  
AGTGGAATACAGGAGAGAATAAACAAAATGGGATGGAGCAGACTACAAATGAAGAAACAG  
AAGTTACAAGCCAACCAGGATACGTACAGAGGAGAATTTGAAACAGGAAGAAAATGTGGA  
TGATAGTTTTAGCAGTGAGAACAGTGTGTTGGAACATCCATAGAAAACAATTTTGTGGCAT  
CAGAGTCAGATGTCTCCGTAGGAGATAGAAGGGTCAATAACTTGGATGAAAACCTGGGAC  
AGAGCTACACAACCAGTGATTCAGATGAAGAGGAGAGGAGAGCCTCACCTGAGCCAGATC  
TGACCCTGAGAGATTACCAGATGGAAGTTGCAAAGCCAGCATTGAATGGGGAGAATATTAT  
AATATGTCTCCCTACAGGCAGTGGTAAAACCAGAGTGGCTGTTTACATTACCAAAGATCAC  
TTGGATAAGAAGAAAAGAGCATCAGAGCCTGGAAAGGTCATAGTACTTGTTAATAAGGTTC  
CATTGGTAGAACAGCATTTACAAAGAGAGTTTAGTCCATTCTGAAGCGTTGGTATAAGGTT  
ACTGGTTTAAGTGGTGATTCTCAGCTGAAAATCTCATTTCTGAAGTTGTCAGAAGAAATGA  
TGTCATCATCAGTACAGCACAGATCCTTGAGAATTCATTGTTAAATGCATCCAAGGAAGAG  
GAAGAAAGTGTCCACTTATCAGATTTTTCCCTCATYATTATTGATGAGTGTGCATCACTCA  
AAAGGAAGGTGTCTACAACAATATAATGCGACGCTACTTAAAAGAAAAGATGAAGAACAGG  
AAGCTGGCAAAAGAAAACAAACCACTGATCCACAGCCTCAAATTCTGGGACTTACAGCCT  
CACCTGGTGTAGGAGGTGCAACATCCTACTCAAAGCTGAAGAGCATATTCTGAAAATCTG  
TGCCAATCTTGATGCATGTAGAATTATGACTGTTGAAGAGCATGCCTCCCAATTGAAGAATC  
GGGTGAAGGAACCATCTAAAAAACTGTGATTGCAGATGACAAAAAAGGGATCCATTTAA  
AGAGAGAATTACTGAGATCATGACAGAAATTCAAACTATTGCCAGCTACATCCAAAATCTG  
AGTTTGGAAGTACAGACATATGAACAGTGGGTGATCAGAGAAGAGAGAAGAGCTGCAAAAG  
AAGAAAAACGCAGGGAACGTGTCTGTGCAGAGCACCTGAAGAAATACAATGATGCTCTCCA  
GATAAATGACACCATCCGAATGGTGGATGCCTACAATCACCTAAATAACTTCTATAAGGAG  
GAGAAAAAGTAAGAAGACAGTAAGGAGTGATGATGATGATGATGATGAACCAGCAGTAT  
CAAAACAGGATGAAACAGATGCATTTCTAATAGATTTATTTTCATGCAAAAAAGAAACAGCTG  
AAAGAGTTGACAGGAAAGCCAGAAAATGAAAATGAGAAATTAATAAAGTTGAGAAATACTTT  
AATGGAGGAATTCACGAAGACTGAGGAACCTCGAGGAATCATTTTCACAAAGACTCGTCTA  
AGTGCCCTTTGCTCTATTCCAGTGGATTAAGGACAACCCAAAATTTGAAGAAGTGGGAATTA

GGGCCCATTTATCTGATCGGCTGTGGACATAAGAGTGAAATGAAGCCCATGACTCAGAATGA  
GCAAAGGGAAGTTATTGATAAATTTGACATGGAAGTATAAATTTACTAATTGCTACTACTG  
TAGCTGAGGAAGGCCTGGACATCAAAGAGTGTAACATCGTTATTTCGCTACGGCCTCGTCAC  
CAATGAAATTGCCATGGTGCAGGCTCGTGGTAGAGCTCGATCTGATGAAAGCACCTATGCT  
CTTGTGGCTTCAAGTGGCTCAGGGGCTGTTGAACGTGAAGATGTGAATATTTTTTCGTGAGC  
AAATGATGTATAAGGCCATTCAGCGTGTCCAGAAGATGCCACAGGAAGAGTATTTAAATAA  
GATTCAGAGTTTTCCAGTTGCAAAGTATAGTGGAAAAACAAATGAAGGCCAAAGAGAGATCAG  
TGCAAGACGTACAAGAAAAATCCTTCACTAATAAAATTCTTATGCAAAAATTGCTACAAGCC  
AATATGTTCTGGAGAAGACATACAAGTTATTGAAGACATGCATCATATCAGTGTGAAARAAG  
ATTTCCAAAGTCTTTATCATACAAGAGAAAAATAAAACACTGCAAGATAAGAATGCTGATTAC  
CAAACAAATGGGGAAATTATATGCAAAGACTGTGGACAAGCTTGGGGAAATATGATGGTTC  
ACCGAGGTCTTGACCTGCCTTGTCTGAAGATTAGAAATTTTGTGGTTGTGTTTGCAGACAA  
GAAAACAACAAAGCACATTTTTTAAGAAATGGGGAGAGCTGCCCATCAGGTTTCCTAGTTTT  
GATTATGCAGCTCATTATCCTTCAAGTGATGAAGATTAA

>aegyptius\_monachus-mda5

ATGGCAGCGGAGTCCCGAGACGAGCGCTTCCTCTACATGATCTCCTGCTTCAGGCCGCGG  
CTGAAGCAGGTCATCCGCGTGCAGCCGGTGCTGGACCGGCTTCCCTCGCTGAGCGCGGG  
GGAGAGGGGAGAAGGTGCGGGCGGCCGCCCTGCAGCGGGGCGAGGTGGAGGGAGCGGA  
GGAGCTGCTGCGGGCCGTGGAGCGGGGGCCCCGCGGGTGCGGCTGTTCCACGAGTTC  
CTGCAGGCGCTGGAGCACGGCGGCTGCAGCCTGGCCGCCTGCTACGTGAACCCAGCCT  
CAGCCAGCTGCCCTCGCCGGCCGAGGAGGCCGACCACGACCTCTGCGTGCACCTTGGTGC  
AGCTGCTCCACAGCACTCTGGTGGATAAAATGCAGGCCATGCAGGTGGCCGAGAAGTGCT  
TGCAGATGGGCATCTTCCAGGACGAGGACCTGGATCGGATCCCACTGTTACTGACAATC  
GTGGGAACAGAGATGGTGCAAGGGAGCTACTGAGCAGAATAGTGCATAAGAAAGATTGGT  
TCTCTCCTTTTTTATTGCTCTGCGTGAAACCCAACATGGAGGCCTTGCAGATGATTTAAGC  
GGAAATACAGGAGGAACAGAGAATAGACAAAATGGGATGAAGAACAGTACAAATGAAGAAA  
CAGAAGTTACAAGCCAGCCAGGATTTGCCGTAGTGGAGGATTTGAAACAGCAAGAAAACAT  
GAATGAAAGTTTCAGCAGTGAGAACAGTGTATGGGAAGCATGTATTGGAAGAATTCTGTA  
GTTTCAGAGTCAGATGTCTCCATAGGAGATAGAAGTGTGAGCAACTTGAATGAAAACCTAG  
GACAGAGCTGCACAGCCAGTGATTCAGATGAAGATGAAATGGAGAGCAGAGCTTCACCTG  
AGCCAGATCTGATCCTGAGAGATTACCAGATGGAAGTTGCAAAGCCAGCACTGAATGGGG  
AGAATATTATAATATGTCTCCCTACAGGCAGTGGTAAAACCAGAGTGGCTGTTTACATTGCC  
AAAGATCATTTGGATAAGAAGAAAAGAGCATCAAAGCCTGGAAAAGTTATAGTACTTGTTAA  
TAAGGTACCATTGGTAGAGCAGCATTTACGAAAGGAGTTTAATCCATTCCCTGAAGCGTTGG  
TATCAGGTTATTGTTTAAAGTGGCGATTCTCAGCTGAAAATCTCATTTCCTGAAGTTGTCAG  
AAGAAATGACGTCATCATCAGTACAGCGCAGATCCTTGAGAATTCATTGTAAATGCAGCC  
AAAGAAGATGAAGAAGGCGTCCAGTTATCAGATTTTTCACTCATCATTATCGATGAGTGTCA  
TCACACTCAAAGGAAGGTGTCTACAACAATATAATGCGACGTTACTTAAAAGAAAAGATGA  
AGAACAGGAAGCTGGCAAAAGAAAACAAACCACTGATCCACAGCCTCAGATTCTGGGAC  
TTACAGCCTCACCTGGTGTAGGAGGTGCAACATCCTACTCAAAGCTGAAGAACATATTCT  
GAAAATCTGTGCCAATCTTGATGCATGTAGAATCATGACTGTTGAAGAGCATGCCTCCCAA  
TTGAAGAATCAGGTGAAGGAACCATATAAGAAGACTGTGATTGCGGATGACAAAAGAAGGG  
ATCCATTTAGAGAGAGAATTACTGAGATCATGACAGACATTCAAACCTATTGCCAGCTCCAT  
CCAAAATCTGAGTTTGGAACTCAGCCATATGAACAGTGGGTGATTAGAGAAGAGAGAAGAG

CTGCAAAAGAAGAAAAACGCAAGGAACGTGTGTGTGCAGAACACTTGAAGAAATACAATGA  
TGCTCTCCAGATAAATGACACCATCCGAATGGTGGATGCGTACAATCACCTAAATAACTTTT  
ATAAGGAGGAGAAAAAGTAAGAAGACAGTAAGGAGTGATGATGATGATGATGATGAACCAG  
CAGTATCAAAACAGGATGAAACAGATGAATTTCTAATAGCTTTATTTTCATGCAAAAAAGAAA  
CAGCTGAAAGAGTTGGCTAGAAAGCCAGAATATGAAAATGAGAAGCTAATACAGTTGCGAA  
ACACTTTAATGGAGGAGTTCACGAAGACTGAAGAACCTAGAGGAATTATTTTCACAAAGACT  
CGGCTAAGTGCCTTTGCTTTATTCCAGTGGATTAAGGATAACCCAAAATTTGAAGAAGTGG  
GAATTAAGGCCCATTTATCTTATCGGTGCTGGACATAACAGTGAAATTAACCCATGACTCAG  
AATGAGCAAAGGGAAGTTATTGATAAATTCGAAGTGGAATGTAAATTTACTTATTGCTAC  
TACTGTAGCTGAGGAAGGCCTAGACATCAAAGAATGTAACATCGTTATTCGCTATGGCCTC  
GTCACCAATGAAATTGCTATGGTGCAGGCTCGTGGTCGAGCTCGAGCTGATGAGAGCACC  
TATGCACTTGTGGCTTCAAGTGGCTCAGGAGCTGTTGAACGCGAAGATGTTAATATTTTCC  
GTGAGAAAATGATGTATAAGGCCATTACGCGTGTCCAAAAGATGCCGCAGGAAGACTATTT  
AAATAAGATTGAGAATTTCCAGTTGCAAAGTATAGTGGAAAAACAAATGAAGGCCAAAGAGA  
GATCAGCGCAAGACATACAACAAAAATCCTTCACTAATAACATTCCTATGCAAAAATTGCCA  
CAAGCTGATATGTTCTGGAGAAGACATACAGGTTATTGAAAACATGCATCATGTCAGTGTG  
AAAAAAGATTTCCAAAGTCTTACCATACAAGAGAAAATAAGACACTGCAAGATAAGCATGC  
TGATTACCAGATAAATGGGGAAATTATATGTAAAGATTGTGGACAAGCTTGGGGAAATATGA  
TGGTTCACCGAGGTCTTGACCTGCCTTGTCTAAAGATTAGAAATTTTGTGGTTGTGTTTGAA  
GACAAGAAAACAACAAAGCAAATGTTTAAGAAATGGGGAGAACTGCCTGTCAGGTTCCCTA  
ATTTTGATTATGCAGCTCATTGTCCTTCAAGTGATGAAGATTAA

>aerodramus\_maximus-mda5

ATGGCTGAGGAGTCCCGAGACCAGCGCTTCCTCTACATGATCTCCTGCTTCAGGCCGCGG  
TTGAAGCAGTTCATCCGGGTGCAGCCGGTGTCTGGACCGGCTTCCCTCGCTGAGAGCAGC  
GGAGAAGGAGAAGGTGCGGGCGGCCGCCCTGCAGCGGGGCGAGGTGGAAGGGGCGGA  
GGAGCTGCTGCGGGCCGTGGAGCAGGGGCCCCACGGCTGCGGCTGGTTCCACGAGTTT  
CTGCAGGCGCTGGAGCAGAGTGGCTGCAGTCTGGCCGCCAGCTATGTGAACCCGAGCCT  
TAGCCAGCTCCCCTCACCTGCTCAGGAGGCTGACCATGACCTCTGCGTGCAGTGGTGCA  
GTTGCTTCACAGCACACTGGTGGACAGAATGCAGACCATGCAAGTGGCCGAGCAGTGCCT  
GCAGATGGGCATCTTCCAGGACGAGGACCTGGATCGGATCCAGACTGTTACTGACAATCG  
TGGGAATAGAGAAGGTGCAAGGGAGCTGTTGAGCAGAATAGTGCAGAAGAAAGATTGGTT  
CTCTCCGTTTTTGA CTGCTCTGCGTGACACCCAACATGGACACCTTGCAGATGATTTAAGT  
GGAAATACAAGAGGAAYGGAAAATGGACAAAATGGGATAAAGAACAGTACAAACGAAGAAA  
CAGAAGCTACAAGCCAACTGGGATATGCTGTTGTGGAGGATTTGAAACAGCAAGAAAAAGT  
GAATGATAATTTGAGCAGTGAAAACAGTGTATTGAAACATCTATTGGACAGAATTCTGTCA  
TTTCAGAGTCAGATGTCTCCATAGGAAATGAAAGTGTTAACAACCTTGAATGAAAACCTGGGA  
CAGAGCTGCACAACCAAGTGATTGAGATGGAGATGAAGTGGAGAGCAGAGCTTCACCTGAG  
TCAGATGTGATCCTGAGAGATTACCAGATGGAAGTTGCAAAGCCAGCACTGAATGGAGAG  
AATATTATAATATGTCTCCCTACAGGCAGCGGTAAAACCAGAGTGGCTGTTTACATTACCAA  
AGATCACTTGGATAAGAAGAAAAGAGCATCAGAGCCTGGAAAAGTTATAGTACTTGTTAATA  
AGGTACCATTGGTAGAACAGCATTTACGAAAGGAGTTTCATCCATTCCTGAAGCCATGGTA  
TCAGGTTATTGGTTTAAAGTGGTGATTCTCAGCTGAAAATCTCGTTTCCTGAAGTTGTCAAAA  
AAAATGATGTAATMATCTGTACAGCACAGATCCTTGAGAATTCAGTGTAAATGCAGGAGAA  
GAAGATGAAGAAGGTGTCCACTTATCAGACTTTTCGCTCATCATTATCGATGAGTGTCA

CACTCAAAAGGAAGGTGTCTACAACAATATAATGCGACGTTACTTAAAAGAAAAAATGAAGA  
ACAAGAAGCTGGCAAAAGAAAACAAACCACTGATCCCACAGCCTCAGATTCTGGGACTTAC  
AGCTTCACCTGGTGTAGGAGGTGCAACATCCTATTCAAAGCTGAAGAACATATTCTGAAA  
ATCTGTGCCAATCTTGATGCATGTAGAATTATGACTGTTGAAGAGCATGCCTCCCAACTGAA  
GAATCAGGTGAAGGAACCATATAAGAAGACTGTGATTGCAGATGACAAAAGAATTGATCCA  
TTTAGAGAGAAAATTACTGAGATCATGACAGTCATTCAAACCTATTGCCAGCTCTATCCAAA  
ATCTGAGTTTGGAACTCAGCCATAYGAACAGTGGGTGATTAAAGAAGAGAGAAAAGCTGCA  
AAAGAAGAAAAACGCAGGGGACGTGTCTGTGCAGAGCACTTGAAGAAATACAATGATGCT  
CTCCAGATAAATGACACCATCCGAATGGTGGATGCATACAATCACATAAAACAACTTCTACAA  
GGAAGAGAAAAAAGAAGACAGTAAGGAGTGACGATGATGATGATGAAGAACCAGCAGT  
ATCAAAACAGGATGAAACAGATAAATTTCTAATAGGTTTATTTTCATGCAAATAAGGAACAGC  
TGAAAGAGTTGGCTAGAAAGCCGGAATATGAAAACGAGAAGCTGATACAGTTGCGAAACAC  
TTTAATGGAGGAGTTCACAAAGACTGAGGAACCCAGAGGAATCATTTTCACAAAGACTCGG  
CTAAGTGCCTTTGCTCTATTCCAGTGGATTAAGGATAACCCAAAATTGGAAGAAGTGGGAA  
TTAAGGCCCATTTATCTTATTGGTGTGGACATAACAGTGAAACAAAACCCATGACTCAGAAC  
GAACAGAGAGAAGTTATTGATAAATCCGAGGTGGAAATGTGAATTTACTTATTGCTACTAC  
TGTTGCTGAGGAAGGGCTAGACATCAAAGAGTGTAACATCGTTATTCGCTATGGCCTCGTC  
ACCAATGAAATTGCTATGATGCAGGCTCGTGGTGCAGCTCGAGCTGATGAGAGTACCTATG  
CACTTGTGGCTTCGATTGGCTCAAGAGCTATTGAACGTGAAGATGTTAATCTTTACCGTGA  
GAAAATGATGTATAAGGCCATTGAGCGTGTCCAGAAGATGCCACAGCAAGAGTATTTAAAT  
AAGATTCAGAATTTCCAGTTACAAAGTCTAGTGGAAAAAGAAATGAAAGCAAAACGAGATCA  
GTACAAGAAATACAAGAAAAATCCTTCACTAATAACATTCCTATGCAAAAATTGCCACAAGC  
TGGTATGTTCTGGAGAAGACATACAAGTTATTGAAAACATGCATCATGTGAGTGTAAAAAA  
GATTTCCAAAGTCTTTACCATACAAGAGAAAAATAAGACACTGCAAGATAAGGATGCCGATTA  
CCAGATAAATGGGGAAATTATATGTAAAGATTGTGGACAAGCATGGGGAAATATGATGGTT  
CACCGAGGTCTTGACCTGCCTTGTCTAAAGATTAAAAATTTTGTGGTTGTGTTTGGAGACAA  
GAAAACAACGAAGGGTATCTATAAGAAATGGGGAGATCTGCCCATTTGGGTTCCCTAGTTTT  
GATTATGCAGCTCATTGTCCTTCAGGATATGAAGACTGA

>agapornis\_roseicollis-md5

ATGGCAGCGGAGTTGCGGGACGAGCGTTTCCTCTACATGATCTCGTGCTTCAGGCCGCGG  
CTGAAGCAGTTCATCCGGGTGCAGCCGGTGCTGGACCGGCTCCCTTCCCTCAGCGCGGA  
GGACAGGGAGAGGGTGCGGGCGGCCGCGCTGCAACGGGGCGAGGTGGAAGGGGCGGA  
GGAGCTGCTGCGGGCCGTGGAGCGGGGACCCGCGGGTGTGGCTGGTTCCACGAGTTC  
TTGCAGGCGCTTGAGCAAGGCGGCTGCGGCATGGCCGCTGCTACATGAACCCCAACCT  
CAGCCAGCTGCCCTCGCCGGCCGAGGAGGCCGATCACGACCTCTGCGTGCAATTGGTGC  
AGCTGCTTCACAGCACTCTCGTGGATAGTATGCGGACCATGCAGGTGGCCGAGAAGTGCC  
TCCAGATGGGCATCTTCCAGGATGAGGACCTGGATGGGATCCATACTGTTACTGACAGTC  
GTGGGAACAGAGAAGGTGCAAGGGAGCTATTGAGCAGATTAGTGCAGAAGAAAGATTGGT  
TCTCTCGTTTTTTGATTGCTCTGCGTGAAACCCAACATGGAAGCCTTGACAGATGATTTAAGT  
GGAAATATAGGAGGAACAAAGGATAAACAAAATGGGATGAAGAACAGTACAAATGAAGAAA  
CAGAAGTTACAAGCCAACCAGCTTATGCCATAGTGGAGGATTTGAAGCAGCAGGAAAATGT  
GAATGATAGTTTCAGCAGTGAGAACAATTTATTGGAAACATCTGTTGGAAAGAATTCTGTAC  
TTTCAGAGTCAGATGTCTCTACAGGAGTTGGAAGTGTGAGTAACTTGAATGAAAACCTGGG  
ACAGAGCCGCACAAGCAGTGATTGAGATGAAGAGGAGAGCAGAGCTTCACCTGAGCCAGA

TCTGGTCCTGAGAGACTACCAGATGGAAGTTGCAAAGCCAGCACTGAATGGGGAGAATAT  
CATAATATGTCTCCCTACAGGCAGTGGTAAAACCAGAGTGGCTGTTTACATTACCAAAGAT  
CATTTGGATAAAAAGAAAAGGGCATCAGAGCCTGGAAAAGCTATAGTCCTTGTTAATAAGG  
TACCATTGGTAGAACAGCATTTACGAAAGGAGTTTAGTCCCTTCCTGAAGCGCTGGTATCA  
CATTATTGGTTTAAGTGGTGATTCTCAGCTGAAAATCTCATTTCCCTGAAGTTGTCAGAAAGAA  
ATGATGTCATCATCTGTACAGCACAGATCCTTGAGAATTCAGTCTGAATGCAGACAAAGA  
GGATGAAGAAGGTGTCCACTTATCAGATTTTTCACTCATCATTATTGATGAGTGTATCACA  
CTCAAAGGAAGGTGTCTACAACAATATAATGCGACGTTACTTAAAAGAAAAAAGAAGAAC  
AGAAAGTTGGCAAAGAAAACAAACCGCTGATCCACAGCCTCAGATTCTGGGACTTACAG  
CCTCACCTGGTGTAGGAGGTGCAACATCCTATTCCAAAGCTGAAGAACATATTCTGAAAAT  
CTGTGCCAATCTTGATGCATGTAGAATCATGACTGTTGAGAAGCACGCCTCCAGCTGAAG  
AATCAGGTGAAGGAACCTTTTAAGAAGACTGTGATTGCAGATGACAAAAAAGGGATCCAT  
TTAGAGAGAGAATAACTGAGATCATGACAGAGATTCAAACCTATTGCGAGCTTCATCCAAAA  
TCTGAGTTTGGAACTCAGCCATATGAACAGTGGGTGATCAGAGAAGAGAAAAAAGCTGCAA  
AAGAAGAAAAACGCAAGGAACGTGTCTGTGCAGAACACCTGAAGAAATATAATGATGCTCT  
CCAGATAAATGATACCATCCGAATGGTAGATGCATACAATCACCTGAATAACTTTTATAAGG  
ATGAGAAAAGTAAGAAAGCAGTAAGGAGTGATGATGATGATGCACCAGCAGTATCAAA  
ACAGGATGAAACAGATTTATTTCTAATAGGTTTATTTACGCAAAAAAGAAACAGCTGAAAG  
AGTTGGCTAGAATGCCAGAATATGAAAATGAGAAGCTAACACAGTTGCGAAACACTTTAAT  
GGAGGAGTTCACGAAGACTGAGGCACCTAGAGGAATTATTTTACAAAGACCCGGCTAAG  
TGCCTTTGCTTTATTCCAGTGGATTAAGGATAACCCAAAATTTGAAGAAGTGGGAATTAAGG  
CCCATTATCTTATTGGTGCTGGACATAACAGTGAAATGAAACCCATGACTCAGAATGAGCA  
ACGGGAAGTTATTGATAAATTCGAGCTGGAAATTTGAATTTACTTATTGCTACTACTGTAG  
CTGAGGAAGGCCTAGACATCAAAGAGTGTAACATTGTTATTCGCTATGGCCTTGTACCAA  
TGAAATTGCTATGGTGAGGCTCGTGGTCGAGCTCGATCTGATGAGAGCACCTATGCACTT  
GTGGCTTCAAGTGGCTCAGGAGCTGTTGAACGTGAAGATGTTAATATTTTCCGTGAGAAAA  
TGATGTATAAAGCCATTCAGAATGTCCAGAAGATGTCACAGGAAGAGTATATAAAGAAGATT  
CTGAATTTCCAGTGTCAAAGTATAGTGGAAAAAGAAATGAAGGCAAAAAGACATCAGCACA  
AGACATAACAAGAAAAATCCTTCACTAATAACATTCCCTATGCAAAAATTGCCACAAGCTGGTA  
TGTTCTGGGGAAGACATACGAGTTATTGAAAACATGCATCATGTCAGTGTGAAAAGAGATTT  
CCAAAGTCTTTACCATAACAAGAGAAAAATAAGACACTGCAAGATAAGAATGCTGATTGCCAG  
ACAAATGGAGAAGTTATATGTAAAGATTGTGGACAAGCTTGGGGAAATATGATGGTTTACC  
GAGGCCTTGACCTGCCTTGTCTAAAAATTACAAATTTTGTGATTGTGTTTGAAGACAAGAAG  
ACAAGAAAAGAAATTTTTAAGAAATGGAGAGAGCTGCCCATCAAGTTCCTGGTTTTGATTA  
TGCAGCTCATTGTCCTTCAAGTGATGAAGATTAA

>alauda\_arvensis-mda5

ATGGCAGAGGGCACCCGGGACGAGCGGTTCTGTACATAATCTCCTGCTTCAGGCCGCG  
GCTGCGGCAGTACATCCAGGTGCAGCCCGTGCTGGACGGGCTCCCCTCGCTGAGCGCGG  
AGGACAGGGACAGGGTGCGTACGGCCGCCCTGCAGCGCGGCGAGGTGGCGGGCGCCGA  
GGAGCTGCTGAGGGCCGTGGAGCGAGGGCCCCGCGGCTGCGGCTGGATCCGCGAGTTC  
CTGCAGGCGCTGGAGAGCGGGGGCTGCAGCCTGGCCGCCTGCTAYGCCAACCCAGCCT  
GAGCCAGCTGCCCTCGCCGGCAGAGGAGAGCGAGCACGACCTGTGCGTGCACCTGGTGC  
AGCTGCTGCACGGCACSTGGTGGACAGGATGCGCGCCGTGCCGGTGGCCGAGAAGTGC  
CTGGAGATGGGAATCTTCTTGGACGAGGACGTGGATCGGATCCAGACTGTTACTGACAAT

CGTGGGAACAGAGATGGTGCAAGGGAGCTACTGAGCAGAATAGTCCAGAAGAAAGATTGG  
TTCTCTTCTTTTTTATTGCTCTCCGTGAAACCCAACATGAAGACCTTGCAAATGATTTAAGT  
GGAAATACAGGAGAGAATAAACAAAATGGGATGGAGCAGACCACAAATGAAGAGACAGAA  
GTTAGAAGCCAACCTGGATACCTCACAGAGGAGAATGTGAAACAGGAAGAAAATGTGGAT  
GCTAGTTTCAGCAGTGAGAACAAATGTGTTGGAAACATCCATTGAAAAGAATTCTGTGGTGT  
CAGAGTCAGATGTCTCCATAGGAGATGGGAATGTCAGTAACTTGTATGAAGACCTGGGACA  
GARCTGCACAACCAGTGATTGAGATGAAGTGGAGAGGAGAGCCTCACCTCAGCCAGATCT  
GATCCTGAGGGACTACCAGATGGAAGTTGCAAAGCCAGCACTGAATGGGGAGAATATTAT  
AATCTGTCTCCCTACGGGCAGTGGTAAAACCAGAGTGGCTGTTTACATTACCAAAGATCAC  
TTGGATAAGAAGAAAAGAGCATCAGASCCTGGAAAAGTCATAGTACTTGTTAATAAGGTTCC  
ATTGGTAGAACAGCATTTACAAACAGAATTTAGTCCATTCCCTGAAGCGTTGGTATCAGGTAA  
CTGGTTTAAAGTGGTGATTGTCAGCTGAAAATCTCATTTCCTGAAGTTGTCAAAGAAATGAT  
GTCATCATCTGTACAGCACAGATCCTTGAGAATTCAGTGTAAATGCATCCAAGGAAGACG  
AAGAAGGTGTCCACTTATCAGATTTTTCCCTCATCATTATTGATGAGTGTATCACACTCAA  
AAGGAAGGTGTCTACAACAATATAATGCGGCGCTACTTAGAAGAAAAGATGAAGAACAGGA  
AGCTGGCAAAAAGAAAACAAACCACTGATCCCACAGCCTCAGATTCTGGGACTTACAGCCTC  
ACCTGGTGTAGGAGGTGCAACATCCTACGCAAAAAGCTGAAGAGCATATTCTGAAAATCTGT  
GCCAATCTCGATGCATGTAGAATTATGACTGTAGAAGAGCATGCCTCCCAGCTAAAGAAKC  
AGGTGAAGGAACCAGCTAAGAAGACAGTGATTGCAGATGACAAAAGAAGGGATCCATTTAA  
AGAGAAAATTACTGAGATCATGACAGAAAATACAAAACCTATTGCCAGCTGCATCCCAAGTCT  
GAGTTTGGAACCTCAGACATATGAACAGTGGGTGATCAGAGAAGAGAGAAGAGCTGCAAAA  
GAAGAAAAACGCAGGGAACGTGTCTGTGCAGAACACTTGAAGAAATACAATGATGCTCTCC  
AGATAAATGACACCATCCGAATGGTGGATGCCTACAATCACCTAAATAACTTCTATAAAGAG  
GAGAAAAGTAAGAAGACAGTCAGCAGTGATGATGATGATGATGATGATGATGAAGCAGCA  
GTATCTAAACAGGATGAAACAGATGAATTTCTAATAGGTTTATTTTCATGCAAAAAAGAAACA  
GCTGGAAGAGTTGACTGGAAAGCCAGAAAATGAAAATGAGAAGCTAATAAAGTTGAGAAAT  
ACTTTAATGGAGGAGTTCACAAAGATTGAGGAACCTCGAGGAATCATTTTCACAAAGACTC  
GTCTGAGTGCCTTTGCTCTATTCCAGTGGATTAAGGACAACCCAAAATTTGAAGAAAGTGGG  
AATTAGGGCCCCATTATCTTATTGGCTCTGGACATAAGAGCGAAGTGAAGCCCATGACTCAG  
AATGARCAAAGGGAAGTTATTGATAAATTTGACGTGGAAATGTAAATTTACTGATTGCTAC  
TACTGTAGCWGAGGAAGGCCTGGACATCAAAGAGTGTAAACATTGTTATTGCTATGGCCTC  
GTCACCAATGAAATTGCTATGGTGCAGGCTCGTGGTAGAGCTCGAGCTGATGAAAGCACC  
TATGCTCTTGTGGCTTCAAGTGGCTCAGGGGCTGTTGAACGTGAAGATGTTAATATGTTTC  
GTGAGAAAATGATGTACAAGGCCATTCAGCGTGTCCAGAAGATGCCACAGGAAGAGTATTT  
AAATAAGATTGAGAGTTTCCAGTTGCAAAGTATAGTGGAAAACGAATGAAGGCCAAAGAGA  
GATCAGCTCAAGACATACAAGAAAAATCCTTCCCTAATAAAATTCTTATGCAAAAATTGCTA  
CAAGTCAATATGTTCTGGAGAAGACATACAAGTTATTGAAGACATGCATCATGTCAGTGTGA  
AAAAAGATTTCCAGAGTCAATATCATACAAGAGAAAATAAAACACTGCAGGATAAGCATGCT  
GATTACCAGATAAATGGGGAAATCATATGCAAAGACTGTGGACAAGCTTGGGGAAATATGA  
TGGTTCACCGAGGTCTTGACCTGCCTTGTCTAAAGATTAGAAATTTTGTGGTTGTGTTTGAA  
GACAAGAAAACAACAAAGCAAATTTTTAAGAAATGGGGAGATCTGCCCATCAGGTTTCCTA  
GTTTGGATTATGCAGCTTATTGTCCTTCAAGTGATGAAGATTAA

>alca\_torda-md5

ATGGCAGAGGAGTGCCGAGACGAGCGGTTCCCTCTACATGATCTCCTGCTTCAGGCCGCGG

CTGAAGCAGTTCATCCGGGTGCAGCCGGTGCTGGACCGGCTTCCCTCGCTGAGCCCGGA  
GGACAGGGAGAGGGTGCGGACGGCCGCCGTGCAGCGCGGCGAGGTGGAGGGGGCGGA  
GGAGCTGCTGCGGGCCGTGGAGCGGGGTCCCCGCGGCTGCGGCTGGTTCCACGAGTTC  
CTGCAGGCGCTGGAGCAGGGCGGCTGCAGGCTGGCTGCCTGCTACGTGAACCCAGCCT  
CAGCCAGCTGCCCTCGCCGGCCGAGGAGGCCGACCATGACCTCTGCGTGCACTTGGTGC  
AGCTGCTCCACAGCACACTGGTGGATAAGATGCAGACCGTGCAGGTGGCTGAGAAGTGCC  
TGCAGATGGGCATCTTCCAGGATGACGACCTGGATCGGATCCACACTGTTACTGACAATC  
GTGGGAACAGAGATGGTGCAAGGGAGCTATTGAGCAGAATAGTGCAGAAGAAAGACTGGT  
TCTCTCCTTTTTTGGTTGCTTTGCGTGAAACCCAACATGGAGACCTTGCAGATGATTTAAGC  
GGAAATACAGAAGAAACAGAGAATAGACAAAATGGGATGAAGAACAGTACAAATGAAGAAA  
CAGAAGTTACAAGCCAACCAGGATATGCTGTAGCAGAGGATTTGAAACAGCAAGAAAATGC  
GAATGGTAGTTTTGGCAGTGAGAACAGTGTATCGGAAACATCTATTGGAAAGAATTCTCTA  
GTTCCCGAGTCAGATGTCTCCATAGGAGATGGAAGTGTGAGTAACCTTGAATGAAAACCTGA  
GACAGAGCTGCACAACCACTGATTCAGAGGAAGATGAAGGGGAGAGCAGAGTTTCACCTG  
AGCCAGATCTGATCCTGAGAGATTACCAGATGGAAGTTGCAAAGCCAGCACTGAACGGGG  
AGAATATCATAATATGTCTGCCTACAGGCAGTGGTAAAACCAGAGTGGCTGTTTACATTACC  
AAAGATCACTTGGATAAGAAGAAAAGAGCATCTGAGCCTGGAAAAGTTATAGTACTTGTTAA  
TAAGGTACCGTTGGTAGAACAGCATTTACGAAAGGAGTTTAATCCATTCCCTGAAGCGTTGG  
TATCAGGTTATTGGTTTAAAGTGGTGATTCTCAGCTGAAAATCTCATTTCCTGAAGTTGTCAG  
AAGAAATGATGTCATCATCAGTACAGCACAGATCCTTGAGAATTCAGTGTAAATGCAGCCA  
AAGAAGATGAAGAAGGTGTCCACTTATCAGATTTTTCACTCATCATTATCGATGAATGTCAT  
CACACACAAAAGGAAGGTGTCTACAACAATATAATGCGACGTTACCTAAAAGAAAAGAGGA  
AGAACAGGAAGCTGGCAAAGGAAAACAAACCACTGATCCCACAGCCTCAGATTCTGGGAC  
TTACAGCCTCACCTGGTGTAGGAGGTGCAACATCCAACCTCAAAAGCTGAAGAACATATTCT  
GAAAATCTGTGCCAATCTTGACGCACGTAGAATCATGACTGTTAAAGAGCATGCCTCCCAA  
CTGAAGAACCAGGTGAAGGAACCATATAAGAAGACTGTGATTGCAGATGACAAAAGAAGG  
GATCCATTTAGAGAGAGAATTACTGAAATCATGAGTGAGATTCAAACTATTGCCAGCTCTA  
TCCAAAATCTGAGTTTGGAACTCAGCCATATGAACAGTGGGTGATTAGAGAAGAGAAAAA  
GCTGCAAAAAGAAGAAAACGCAAGGAACGTGTCTGTGCAGAACACTTGAAGAAATACAATG  
ATGCTCTCCAGATAAATGACACCATCCGAATGGTGGATGCGTACAATCACCTAAATAACTTT  
TATAAGGAGGAGAAAAGTAAGAAGACAGTAACGAGTGATGATGATGATGATGAACAG  
CAGTATCAAAACAGGATGAAACAGATGAATTTCTAATAGTTTTATTTTATGCAAAAAAGAAA  
CAGCTGAAAGAGTTGGCTAGAAAGCCAGAATATGAAAATGAGAAGCTAGTACAATTGCGAA  
ACACTTTAATGGAGGAGTTCACGAAGACGGAAGAACCTAGAGGAATTATTTTCACAAAGAC  
TCGGCTAAGTGCCCTTTGCTCTATTCCAGTGGATTAAGGACAACCCAAAATTTGAAGAAGTG  
GGAATTAAGGCCCATTTATCTTATTGGTGCTGGACATAACAGTGAAATTAACCCATGACTCA  
GAATGAGCAAAGGGAAGTCATTGATAAATTCCGAGGTGGAAGTGTAATTTACTTATTGCTA  
CTACTGTAGCTGAGGAAGGCCTAGACATCAAAGAGTGTAACATCGTTATTCGCTATGGCCT  
CGTCACCAATGAAATTGCTATGCTGCAGGCTCGCGGTCGAGCTCGAGCTGATGAGAGCAC  
CTATGCACTTGTGGCTTCGAGTGCCTCAGGAGCTGTTGAACGTGAAGATGTTAATATTTTC  
CGTGAGAAAATGATGTATAAGGCCATTGAGCGTGTCCAGAACATGCCACAGGAAGAGTATT  
TAGAGAAGATTGAGAATTTGCAGTTGCAAAGCATCGTGGA AAAACAAATGAAGGCAAAGAG  
AGATCAGCAGAAGACATACAAGAAAACCCCTTCATTAGTAACTTTCTATGCAAAAATTGCC  
ACAAGCCGGTATGTTCTGGAGAAGACATACAAGTTATTGAAAACATGCATCATGTCAGTGT



GCAAAAAGACTTCCAAACTCTTTACCATACAAAAGAAAATAAGACACTGCAAGATAAGCATG  
CCGATTACCAGACAAATGGGGAAATTATATGTAAAGATTGTGGACAAGCTTGGGGAAATAT  
GATGGTTCACCGAGGTCTTGATCTGCCTTGTCTAAAGATTAGAAATTTTGTGGTTGTGTTTG  
AAGACAAGAAAACAACAAAGCACATTTTTAAGAAATGGGGAGAACTGCCCATCAGGTTCCC  
TAGTCTTGATTATGCAGCTCATTGTCCTTCAAGTGATGAAGATTAA

>alectura\_lathami-md5

ATGTCGGAGGAATGCCGAGACGAGCGCTTCCTCTACATGATCGCCTGCTTCAGGCCGCGG  
CTGAAGCGGTGCATTTCGGGTGCAGCCGGTGCTGGACTGGCTGCCCTCCCTGAGCGCCGA  
GGAGAAGGACAGGGTGCGGGCGGGCGGCGCTGCAGCGCGGTGAGGTGGAGGGGGCTGA  
GGAGCTGCTGCGCGCCGTGGAGCGGGGGCCCCGCGGCCCGGCTGGTTCCCCGAGTTC  
CTGCAGGCGCTGGAGAAAGGAGGCTGCAACCTGGCCGCTTGCTACGTGAACCCAGCCT  
CAGCCAGCTGCCCTCGCCCAGCGAGGAGGCCGACCACGACCTCTGCGTGCACCTGGTG  
AGCTGCTGCACGGCACGCTGGTGGATAAGATGCAGACCAGGCAGGTGGCCGAGAAGTGC  
CTGGAGATGGGCATCTTCCAGGAGGAGGACGTGGTTCGGATTGATGCTGTTACTGACAAT  
CATGGGAACAGAGATGGTGCAAGGGAGCTGTTGAGCAGAGTAGTGCAGAAGAAGGATTG  
GTTCTCTCCATTTTTGATTGCTCTGCGTGAAACCCAACACGAAGGCCTCGCAGATGATTTAA  
GTGGAAAAACAGGAGGAACAGAGAATAAAGAAAAATGAGATGAAGAACAGTACAAACAAAGA  
AACAGAAGCTGCAAGTCAACCAGGACATGATGAGGTGGAGGATTTGAAACAGCAACAAAT  
TTGGATGATAATTTTGTGCGAGAGAACAGTGTATTGGAAACATCAGTTGGAAAGAACTCCG  
TAGCTTCAGAGTCAGTTGTCACTGTTGGAGGTGGAAGTGTCAGTAACTTGCATGAAAACCT  
GGGACAGAGCAGCACAACCAGTGATTACAGACGAAGATGAAGCAGAGAGCAGAGCTTCACC  
TGAGCCAGATCTGATCCTGAGAGATTACCAGATGGAGGTTGCAAAGCCAGCACTGAATGG  
GGAGAATATTATAATCTGTCTCCCTACAGGCAGTGGCAAAACCAGACTGGCTGTTTACATT  
ACCAAAGATCACTTGGATAAGAAGAGAAGAGCATCAGAGCCTGGAAAAGTTATAGTACTTG  
TTAATAAGGTCCCACTAGTGGAACAGCATTTACGGAAGGAGTTTAATCCATTCTGAAACAT  
TGGTATAAGGTTATTGGTTTGAGTGGTGATACTCAGCTGAAAATCTCATTTCCTGAAGTTGT  
CAGAAGAAATGATGTCATCATCTGTACAGCACAGATCCTAGAGAATTCAGTCTGCTAAATGCA  
GCTGAAGAAGATGAACGTGTCCACTTATCAGGTTTTTCACTGATCATTATTGATGAGTGTCA  
TCACACTCAAAGGAAGGCATCTACAACAACATTATGCGGCGTTACTTAAAAGAAAAGATG  
AAGAACAGAAAGCTGGCAAAAGAAAATAAACCTTTGATTCCACAGCCTCAGATTCTCGGAC  
TTACAGCCTCACCTGGAGTAGGAGGTGCAACATCCAACCTCAAAGCTGAAGAACACATTCT  
GAAAATCTGCGCCAATCTTGATGCTCGCAGAATCATGACTGTTGAAGAGCATGCCCTCCAG  
CTGAAGAATCAGGTGAAGGAACCTTTTAAGAAGACTGTGATTGCGGATGACAAAAGAAGGG  
ATCCATTTAGAGAAAAAATTATTGAGATCATGACAGACATTCAAACCTATTGCCAGCTGTGC  
CCAAAATCTGAGTTTGGATCTCAGCCTTATGAACAGTGGGTAATTAGAGAAGAGAAAAAAG  
CTGCAAAAGAAGAAAAACGCAAGGAACGTGTCTGTGCAGAACACTTGAAGAAATATAATGA  
TGCTCTGCAAATTAATGACACCATCCGAATGGTTGATGCATACAATCACCTAAATAACTTTT  
ATAAGGAGTTAAAAAGCAAGAAGACAGTAGGGAGTGATGATGATGAAGAACCAGTAGTATC  
AAACAGGATGAAACAGATAAATTTCTAATAGATCTATTTTCATGCAAAAAAGAAACAGCTGA  
AAGAGTTGGCTAGAAAGCCAGAATATGAAAATGAGAAGCTAATGAAGTTGCGAAACACTTT  
GATGGAGGAGTTCACAAAACTAAGGAATCTAGAGGAATTATTTTCACAAAGACGCGACAA  
AGTGCCCTTTGCTCTGTTCCAGTGGATCATGGATAACCCAAAATTTGAAGAAGTGGGGATTA  
AAGCTCATTATCTTATTGGTGCTGGACACAACAGTGAACTAAACCTATGACTCAGAATGAG  
CAGAGGGAAGTCATCGATAAATTCAGAGTGGGAAGTGTAATTTACTTATTGCTACTACTGT

AGCTGAGGAAGGCCTAGACATCAAAGAGTGTAACATTGTTATTCGCTATGGCCTGGTCACC  
AATGAAATTGCTATGCTGCAGGCCCGTGGTCGAGCTCGAGCTGATGAGAGCACCTATGTG  
CTTGTAGCTTCATGTGGCTCAGGAGCTGTTGAACGTGAAGATGTAAATATTTTCCGTGAGA  
AAATGATGTATAAGGCCATTTCAGCGTGTCCAGAAGATGCCACCAGAAGAGTATTTTAAAAA  
GATTGAGAACTTCCAGTTGCAAAGTATAGTGGAAAAGCAAATGAAGGCAAGGAGAGATCAG  
TGTAAGACATATAAGAAAACTCTTCACTAATAACATTCCAATGCAAGAATTGCCACAAGCT  
GGTATGTTTCAGGAGAAGATATACAAGTTATTGAAAACATGCATCATGTCAAGTGTGAAAAAG  
ATTTCCAACATCTTTACCATACAAGAGAAAATAAGACACTGCAAGATAAACATGCTGATTAC  
CAGACGAATGTGGAAATTATATGTAAAGATTGTGGACAAGCTTGGGGAAATATGATGGTTT  
ATCGAGGTCTGGACCTGCCTTGTCTAAACATTAGAAATTTTGTGGTTGTTCTTGAAGGCAAG  
AAAACAACAAAGGAAATTTTCAAAAAATGGGGAGAAGCTGCCAATCAGATTCCCTAGTTTTGA  
TTATGCAGCTCATTGTCCTTCAAGTGATGAAGATTAA

>amazona\_aestiva-md5

ATGGCAGGGGAGTTGCGAGACGAGCGGTTCTCTACATGATCTCGTGCTTCAGGCCGCG  
GCTGAAGCAGTTCATCCGAGTGCAGCCGGTGCTGGACCGGCTCCCTTCGCTCAGCGCGG  
AGGACAGGGAGAAGGTGCGGGCGACCGCGCTGCAGCGGGGCGAGGTGGAAGGGGCGG  
AGGAGCTGCTGCGGGCCGTGGAGCGGGGGCCCCGCGGGTGTGGCTGGTTCCACGAGTT  
CTTGCAGGCGCTGGAGCACGGCGGCTGCGGCATGGCCGCTTGCTACGTGAACCCCAGCC  
TCAGCCAGCTGCCCTCGCCGGCTGAGGAGGCCGACCACGACCTCTGCGTGCATTTGGTG  
CAGCTGCTTCATAGCACGCTCGTGGATAGTATGCGGACCGTGCAGGTGGCCGAGAAGTGC  
CTGCAGATGGGCATCTTCCAGGATGAGGACCTGGATGGGATCCATACTGTTNCTGAAAATC  
GTGGGAACAGAGAAGGTGCAAGAGAGCTATTGAGCAGATTAGTGCAGAAGAAAGATTGGT  
TCTCTCGGTTTTTATTGCTCTGCGTGAAACCCAACATGGAAGCCTTGACAGATGATTTAAGT  
GGAAATATAGGAGGAACAAAGGATAAACAATAATGGGATGAAGAACAGTACAAANAAAGAAA  
CAGAAGTTACAAGCCAACCAGATTATGCCATACTGGAGGATTTGAAGCAGCAGGAAAATAT  
GAACGATAATTTTCAGCAGTGAGAACAATTTATTGAAACATCTATTGGAAAGAATTCTGTAG  
TTTCAGGATTTGGAAGTGTGAGTAACCTTGAATGAAAACCTGGGACAGAGCTGCACAAGCAG  
TGATTCAGATGAAGAGGAGAGCAGAGCTTCACCTGAGCCAGATCTGGTCCTGAGAGATTA  
CCAGATGGAAGTTGCAAAGCCAGCACTGAATGGGGAGAATATTATAATATGTCTCCCTACA  
GGCAGTGGTAAAACCAGAGTGGCTGTTTACATTACCAAAGATCATTGGATAAAAAGAAAA  
GAGCATCAGAGCCTGGAAAAGTTATAGTCCTTGTTAATAAGGTACCTTTGGTAGAACAGCA  
TTTACGAAAGGAGTTTAGTCCATTCTGAAGCGCTGGTATCACGTTATTGGTTTAAGTGGTG  
ATTCTCAGCTGAAAATCTCATTTCTGAAGTTGTGAGAAGAAATGATGTCATCATCTGTACA  
GCACAGATCCTTGAGAATTCATACTAAACGCAGACAAAGAAGATGAAGAAGGTGTCCGCT  
TATCAGATTTTTCACTCATCATTATTGATGAGTGTGATCACACTCAAAAGGAAGGTGTCTAC  
AACAACATAATGCGACGTTACTTGAAAGAAAAAAGAAGAAGAGGAGCTGGCAAAAGAAA  
ACAAACCACTGATCCCTCAGCCTCAGATTCTGGGACTTACAGCCTCACCTGGTGTAGGAG  
GTGCAACATCCTATTCCAAAGCTGAAGAACATATTCTGAAAATCTGTGCTAATCTTGATGCA  
TGTAGCATCATGACTGTTGAGGAGCATGCCTCCCAGCTGAAGAATCAGGTGAAGGAACCTT  
TTAAGAAGACTGTGATTGCAGATGACAATAAAAAGGATCCATTAGAGAGAGAATAACTGA  
GATCATGACAGAGATTCAAACTATTGCCAGCTTCATCCAAAATCTGAGTTTGGAACTCAGC  
CATATGAGCAGTGGGTGATTAGAGAAGAGAAAAAGCTGCAAAAGAAGAAAAACGCAAGG  
AACGTGTCTGTGCAGAACACCTGAAGAAATATAATGATGCTCTCCAGATAAATGATGCCAT  
CCGAATGGTAGATGCATACAATCACCTGAATAACTTTTATAAGGATGAGAAAAGTAAGAAGA

CAGAAAGGAGTGATGATGATGATGATGCACCAGCAGTATCAAAACAGGACGAAACAGATT  
ATTTCTAATAGGTTTATTTTCATGCAAAAAAGAAACAGCTGAAAGAGTTGGCTAGAATGCCAG  
AATATGAAAATGAAAAGCTAACACAGTTGCGAAACACTTTAATGGAGGAGTTCACGAAGAC  
TGAGGCACCTAGAGGAATTATTTTCACAAAGACCCGGCTAAGTGCTTTTGCTCTATTCCAGT  
GGATTAAAGATAACCCAAAATTTGAAGAAGTGGGNATTAAGGCCATTATCTTATTGGTGCT  
GGACATAGCAGTGAAACGAAACCCATGACTCAGAATGAGCAGCGGGAAGTTATTGATAAAT  
TCCGAGGTGGAATTTGAATTTACTTATTGCTACTACTGTAGCTGAGGAAGGCCTAGACAT  
CAAAGAGTGTAACATTGTTATTCGCTATGGCCTCGTCACCAATGAAATTGCTATGGTGACG  
GCTCGTGGTCGAGCTCGAGCTGATGACAGCACCTATGCACTTGTGGCTTCGAGTGGCTCA  
GGAGCTGTTGAACGTGAAGATGTTAATATTTCCGTGAGAAAATGATGTATAAAGCCATTCA  
GCATGTCCAAAAGATGCCACAGGAGGAGTATTTAAAGAAGATTCAGAATTACCAAGTGTCAA  
AGTATAGTGGAAAAAGAAATGAAGGCCAAAGAGACTTCAGCANAAGACATACAAGAAAAATG  
CTTCACTAATAACATTCTATGCAAAAATTGCCACAAGCTGGTATGTTCTGGGGAAGATATA  
CGAGTTATTGAAAACATGCATCATGTGAGTGTAAGAGAGATTTCCAAAGTCTTACCATAC  
AAGAGAAAATAAGACGCTGCAAGATAAGAATGCTGATTACCAGACAAATGNAGAAGTTATA  
TGTAAGATTGTGGACAAGCTTGGGGAAATATGATGGTTCACCGAGGTCTTGACCTGCCTT  
GTCTAAAGATTATGAATTTTGTGATTGTGTTTGAAGACAAGAAGACAAAAGAAATTTTTAAGA  
AATGGAGAGAGCTGCCCATCGAGTTCCCTGGTTTTGATTATGCAGCTCATTGTCCTTCAAG  
TGATGAAGATTAA

>anas\_platyrhynchos-mda5

ATGTCGACGGAGTGCCGAGACGAGTGCTTCCTCTACATGATCTCCTGCTTCAGGCCGCGG  
CTGAAGCAATACATCCGGGTGATGCCGGTGCTGGACCGGCTGCCCTCGCTGAGCTGGGA  
GGATAGGGAGAAGGTGCGGGTGGCGGCGGAGCAGCGGGGCGACGTGGAGGGGGCCGA  
GGAGCTGCTGCGCGCCGTGGAGCGTGCCCCCGCGACCCAGGTTGGTTTCCTGAGTTCTG  
TGCAGGCGCTGGAGTACGGCGGCTGCGACCTGGCTGCCCGCTACTTGAAGTCCAGCCAG  
CTGCCCTCGCCACCGAGGAGGCTGACCACGACCTCTGTGTGCAATTGGTGCAGCTTCTC  
CACGCCACCTTGGTGGATAAGATGCGGGCCAGGCAGGTGGCCGAGATGTGCCTGCAGAT  
GAACATTTTCCAGGAGGAGGACTTGGAACGGATCAGTGCTGTTACTCAAAGTCTGTTGAA  
CAGAGATGGTGAAGAGAGCTATTGAGTAGAATAGTGCAGAAAAAGGATTGGTTCTCTCCT  
TTCTTGGTTGCTCTGCGTGAAACACAACATGAAGACCTTGAGATGATTTAAGTGGAAATAC  
AGGAGGAAAAGAGAATAAAGGAAACGGGGTGAAGAACAGTACAAACAACGAAACAGAAGC  
TGCAAGCCAACAGGACATTCTGTAGTGAAGGATTTGAAACAGCAAGAAAATCTGAATGGT  
GGTTCTGTCAGTGAAAATGGTGTATTGGAAACATCTGTTGAAAAGAATTCCGTAGTTTTGGA  
ATCGGATGTGCTACAGAAGATAGAAGTGTGAGTAACATGAATGAAAACCTGGGACAGAGC  
AGTACAACCAAGTAATTCAGATGAAGATGAAATGGAGAGCAGAGCTTCACCTGAACCAAGATC  
TGATCCTGAGAGACTACCAGATGGAAGTTGCAAAGCCAGCACTGAATGGGGAGAATATTAT  
AATATGTCTCCCTACAGGCAGTGGTAAAACCAAGAGTGGCTGTTTACATTACCAAAGATCATT  
TGGATAAGAAAAAAGAGCATCAGAACCTGGAAAAGTTATAGTACTTGTTAATAAGGTACCG  
CTAGTGGAACAGCATTTACGAAAAGAGTTTAAATCCATTCTGAAACGTTGGTATCAGGTTAT  
TGGTTTAAAGTGGTGATTCTCAGCTGAAAATCTCATTTCTGAAAGTTGTCAGAAGATATGATG  
TGATCATCAGTACAGCACAGATTCTTGAGAATTCAGTGTTAAATGCAACTGAAGAAGATGAA  
GAAGGTGTCCGCTTATCAGATTTTTCACTCATCATTATTGACGAGTGTATCACACTCAAAA  
GGAAGGCGTCTACAACAATATAATGCGACGTTACATAAAAGAAAAGATGAAGAACAGAAAA  
CTGGCGAAAGAAAACAAACCATTGATTCCACAGCCTCAGATTCTGGGACTTACAGCATCAC

CTGGAGTAGGAGGTGCAAATTCCAACCAAAAAGCTGAAGAACATATTCTAAAAATCTGTGC  
CAATCTTGATGCACGTAGAATCATGACTGTTGAAGAACATGCCTCCCAACTGAAAAATCAG  
GTGAAGGAGCCATTTAAGAAGACCGTGATTGCAGATGACAAAAGAAAGGATCCATTCAGAG  
AAAGAATTATTGAGATCATGACAGATATTCAAAAAGTATTGCAAACCTCTATCCAAAATCTGAGT  
TTGGATCTCAGCCATATGAACAGTGGGTGATTAGAGAAGAGAAAAAAGCTGCAAAGGAAGA  
AAAACGCAAGGAACGTGTCTGTGCAGAACACTTGAAGAAATATAATGATGCTTTGCAAATTA  
ATGACACTATCCGAATGGTTCGATGCATACAATCACCTAAATAACTTTTTATAAGGAGGAAAAA  
AGCAAGAAAAACAATAGGAAGTGATGATGATGAACCAGCAGTATCAAAACAGGATGAAACAG  
ATGAATTTCTACTAGATTTATTTTCATGCAAAAAAGAAACAGCTAAAAGAGTTGGCTAGAAAG  
CCAGAATATGAAAATGAGAACTGGTAAAGTTGCGAAACACTTTAATGGAGGAGTTCACAA  
AGACTAAAGAACCTAGAGGAATTATTTTCACAAAGACTCGGCAAAGTGCCTTTGCCTTATTC  
CAGTGGATTAAGGATAACCCAAAATTTGAAGAAGTGGGGATTAAGGCTCATTATCTTATTGG  
TGCTGGACACAACAGTGAAACTAAACCCATGACTCAGAATGAGCAAAGGGAAGTCATTGAT  
AAATTCGAGGTGGAAGTGTAATTTACTTATTGCTACTACTGTAGCTGAAGAAGGCCTGG  
ACATCAAAGAGTGCAACATTGTTATTCGCTATGGCCTTGTCACTAATGAAATTGCTATGTTG  
CAGGCCCGTGGTTCGAGCTCGAGCTGATGAGAGCACCTATGCACTTGTGGCTTCGAGTGGC  
TCAGGAGCTGTTGAACGTGAAGACGTAAATATTTACCGTGAGAAAATGATGTATAAGGCCA  
TTCAGCGTGTCCAGAGGATGCCACAGGAAGAATATTTACATAAGATTGAGAGCTTCCAGTT  
GCAGAGTATAATGAAAAACAAATGAAGGCCAAAAGAGATCAGCGTAAAACATATAAGAAA  
AACCCTTCACTAATAACATTCCCTATGCAAGAATTGCTATAAGCTGATATGTTTCAGGAGAAGA  
TATACAAGTTATTGAAAACATGCATCATGTCAGCGTGAAAAAAGATTTCCAACATCTTTACC  
ATACAAGAGAAAAATAAGACACTTCAAGATAAACATGCTGATTACCAGACAAATGTGGAAATT  
ATATGTAAAGATTGTGGACAAGCTTGGGGAAATATGATGGTTCACCGAGGTCTTGACCTGC  
CTTGTCTAAAGATTAGAAATTTTGTGGTTGTTTTTGAAGACAAGAAAGCAACAAAGGAAATT  
TTTAAGAAATGGGTAGAAGTGGCCATCAGGTTCCCCAGTTTTGACTATGCAGCTCATTGTC  
CTTCAAGTGATGAAGACTGA

>anser\_cygnoides-mda5

ATGTCGGCGGAGTGCCGAGACGAGTGCTTCCTCTACATGATCTCCTGCTTCAGGCCGCGG  
CTGAAGCAGTGATCCGGGTGCTGCCGGTGCTGGACTGGCTGCCCTCGCTGAGCCGGGA  
GGAGAAGGAGAAGGTGCGGGTGCGGGCGGAACAGCGGGGCGAGGTGGAGGGGGCCGA  
GGAAGTCTGCGCGCTGTGGAGCGCGGCCCGGGGCCAAGGTTGGTTCGCCGAGTTCC  
TGCAGGCGCTGGAGAAAGGTGGCTGTGACCTGGCTGCCCGCTACATGAACCCAGCCAG  
CTGCCCTCACCCACCGAGGAGGCCGACCACGATCTCTGCGTGCCTTGGTGCAGCTGCTC  
CACGCCACCTGGTGGATAGGATGCAGACCAGGCAGGTGGCCGAGAGGTGCCTGCAGAT  
GGACATTTTCCAGGAGGAGGACCTGGAACGGATCAGTGCTGTTACTGACACTCGTGGGAA  
CAGAGATGGTGCAAGGGAGCTGTTGAGTAGAATAGTGCAGAAAAAGGATTGGTTCTCTCCT  
TTTTTGGTTGCTCTGCGTCAAACACAACATGAAGACCTTGCAGATGATTTAAGCGGAAATAC  
GGCAGGAAAAGAGAATAAAGAAAACAGGGTGAAGGACAGTACAAACAAAGAAGCAGAACC  
TGCAAGCCAACCAGGACATGCTGTAGTGGAGGATTTGAAACAGCAAGAAAATCTGGATAGT  
GGTTCTGTCAGTGAAAATGGTGTATTGGAAACATCTGTTGAAAAGAATTCTGTAGTTTTGGA  
ATCAGATGCCGCTACAGAAGATAGAAGTGTGAGTAACATGAATGAAAACCTGGGACAGAGC  
AGTACAACCAAGTGATTCAGATGAAGATGAAGTGGAGAGCAGAGCTTCACCTGAACCAGATC  
TGATCCTGAGAGATTACCAGATGGAAGTTGCAAAGCCAGCACTGAATGGGGAGAATATTAT  
AATATGTCTCCCTACAGGCAGTGGTAAAACCAGAGTGGCTGTTTACATTACCAAAGATCAC

TTGGATAAGAAAAAAGAGCATCAGAGCCTGGAAAAGTTATAGTACTCGTTAATAAGGTAC  
CATTAGTGGAACAGCATTTACGAAAAGAGTTTAATCCATTCTGAAACGTTGGTATCAGGTT  
ATTGGTTTAAGTGGTGATTCTCAGCTGAAAATCTCATTTCTGAAAGTTGTCAGAAGATATGA  
TGTAATCATCAGTACAGCACAGATTCTTGAGAATTCAGTGTAAATGCAACTGAAGAAGATG  
AAGAAGGTGTCCACTTATCAGATTTTTCACTCATCATTATTGATGAGTGTATCACACTCAA  
AAGGAAGGCGTCTACAACAATATAATGCGACGCTACGTAAAAGAGAAGATGAAGAACAGAA  
AACTGGCGAAAAGAAAACAAACCATTGATTCCACAGCCTCAGATTCTGGGACTTACAGCCTC  
ACCTGGAGTAGGAGGTGCAAATTCACCCAAAAGCTGAAGAACATATTCTAAAAATCTGT  
GCCAATCTCGATGCACGTAGAATCATGACTGTTGAAGAACATGCCTCCCAACTGAAAAATC  
AGGTGAAGGAACCATTTAAGAAGACTGTGATTGCAGATGACCAAAGAAGGGATCCATTGAG  
AGAAAGAATTATTGAGATCATGACAGATATTCAAACCTATTGCAAGCTCTATCCAAAATCTG  
AGTTTGGATCTCAGCCATATGAACAGTGGGTGATTAGAGAAGAGAAAAAAGCTGCAAAAGA  
AGAAAAACGCAAGGAACGTGTCTGTGCAGAACACTTGAAGAAATATAATGATGCTCTGCAA  
ATTAATGACACTATCCGAATGGTCGATGCATACAATCACCTAAATAACTTTTATAAGGAGGA  
AAAAAGCAAGAAAACAGTAGGAAGTGATGATGATGATGAACCAGCAGTATCAAAACAGGAT  
GAAACAGATGAATTTCTAATAGATTTATTTTCATGCAAAAAAGAAACATCTAAAAGAGTTGGCT  
AGAAATCCAGAATATGAAAATGAGAAGCTGATAAAGTTGCGAAACACTTTAATGGAGGAGT  
TCACAAAGACTAAAGAACCTAGAGGAATTATTTTCACAAAGACCCGGCAAAGTGCTTTTGCT  
CTATTCCAGTGGATTATGGATAACCCAAAATTTGAAGAAGTGGGGATTAAGGCTCATTATCT  
TATTGGTGCTGGACACAACAGTGAACTAAACCCATGACTCAGAATGAGCAAAGGGAAGTC  
ATTGATAAATTCCGAGGTGGAAGTGTAATTTACTTATTGCTACTACTGTAGCTGAAGAAGG  
CCTCGACATCAAAGAGTGTAACATCGTTATTCGCTATGGCCTTGTCACCAATGAAATTGCTA  
TGTTGCAGGCCCCGTGGTCGAGCTCGAGCTGATGAGAGCACCTATGCACTTGTGGCCTCGA  
GTGGCTCGGGAGCTGTTGAACGTGAAGATGTAAATATTTTCCGTGAGAAAATGATGTATAA  
GGCCATTGAGCGTGTCCAGAGGATGCCGCAGGAAGAATATTTAAATAAGATTGAGAGCTTC  
CAGTTGCAAAGTATAATGGAAAAACAAATGAAGGCAAAAAGAGATCAGCGTAAGACATATA  
AGAAAAACCCTTCACTAATAACATTCTATGCAAGAATTGCCACAAGCTGATATGTTGAGGA  
GAAGATATACAAGTTATTGAAAACATGCATCATGTCAGTGTGAAAAAAGATTTCCAACATCT  
TTACCATACAAGAGAAAATAAGACACTGCAAGATAAACATGCTGATTACCAGACAAATGTGG  
AAATTATATGTAAAGATTGCGGACAAGCTTGGGGAAATATGATGGTTCACCGAGGTCTTGA  
CCTGCCTTGTCTAAAGATTAGAAATTTTGTGGTTGTTTTTGAAGACAAGAAAACAACAAAGG  
AAATTTTTTAAGAAATGGGTAGAAGTGGCCATCAGGTTCCCCAGTTTTTACTATGCAGCTCAT  
TGTCCTTCAAGTGATGAAGACTGA

>antrostomus\_carolinensis-mda5

ATGGCAGAGGAGTCCCGAGACGAGCGCTTCCTCTACATGATCTCCTGCTTCAGGCCGCGG  
CTGAAGCAGTTCATCCGGGTGCAGCCGGTGCTGGACCTGCTCCCCTCGCTGAGCGCAGG  
AGAGAGGGAGAGRGTGCGGGGCGGSCGCCCTGCMGCGGGGAGAGGTGGAGGGGGCGGA  
GGAGCTGCTGCGGGCCGTGGAGCGGGGACCCCGCGGGTGCGGTTTCTTCCATGAGTTCC  
TGCACGCCCTGGAGCACGGGGGCTGCAGCCTGGCCGCCTGCTACGTGAACCCAGCCTC  
AGCCAGCTGCCCTCGCCAGCCCAGGAGGCTGACCACGACCTCTGCGTGCACTTGGTGCA  
GCTGCTTCACGGCACACTGGTGGACAGAATGCAGACCATGCAGGTGGCCGAGAAGTGCC  
TGCAGATGGGCATCTTCCAGGAGGAGGACCTGGATCGGATCCGCACTGTACTGACAATC  
GTGGGAACAGAGATGGTGCAAGGGAGCTATTGAGCAGAATAGTGCAGAAGAAAGATTGGT  
TCTCTCCTTTTTTATTGCGTTGCGTGAACTGAACATGGAGGCCTTGACAGATGATTTAAGT

GGAAATACAGGAGGAACAGAAAAGAGACAAAATGGGATGAAGAACAGTACAAATGAAGAA  
ACAGAAGCTACAGGCCAAGCAGGATATGCCGTAGTGGAGGATTTGAAACAGCAAGAAAAT  
GTGAATGATAGTTTCAGCAGTGAGAACAGCATACTGGAAACATCTATTGGAAAGAGTTCTG  
TAGTTTTAGAGTCAGATGTCTCCATAGGAGATGGAAGTGTCAATAACTTGAATGAAGACCTA  
GGACAGAGCTGCACAACCAGTAATTCAGATGAAGATGAAGTGGAAAGCAGAGCTTCACCT  
GAGCCAGATCTAATCCTGAGAGATTACCAGATGGAAGTTGCAAAGCCAGCACTGAATGGG  
GAGAATATTATAATATGTCTCCCTACAGGCAGTGGTAAAACCAGAGTGGCTGTTTACATTAC  
CAAAGATCACTTGGATAAGAAGAAAAGAGCATCAGAGCCTGGAAAAGTCATAGTACTCGTT  
AATAAGGTACCATTGGTAGAACAGCATTTACGAAAGGAGTTTAATCCATTCTGAAGCGTTG  
GTATCAAGTTATTGGTTTAAGTGGTGATTCTCAGCTGAAAATCTCATTTCTGAAGTTGTCA  
GAAGAAATGATGTCATCATCAGTACAGCACAGATCCTTGAGAATTCAGTGTAAATGCAGCT  
GAAGAAGGTGAAGAAGGTGTTCTCTTATCAGATTTTTCACTCATCATTATTGATGAGTGTCA  
TCACACTCAAAGGAAGGTGTCTACAACAATATAATGCGACGTTACTTAAAAGAAAAGAAGA  
AGAACAAGAAGCTAGCAAAAAGAAAATAAACCACTGATCCACAGCCTCAGATTCTGGGACT  
TACAGCCTCACCTGGTGTAGGAGGTGCAACATCCAACCTCAAAGCAGAAGAACATATTCTG  
AAAATCTGTGCCAATCTTGATGCACGTAGAATCATGACTGTTGAAGAGCATGCCCCCAGT  
TGAAGAATCAGGTGAAGGAACCATACAAGAAGACTGTGATTGCAGATGACAAAAGAAGGG  
ATCCATTTAGAGAGAGAATTACTGAGATCATGACAGACATTCAAACCTATTGCCAGCTCCAC  
CCAAAATCTGAGTTTGGAAGTCAAGCATATGAACAGTGGGTGATTAGAGAAGAGAGAAGAG  
CTGCAAAAAGAAGAAAAACGCAAGGAACGTGTCTGTGCAGAACACTTGAAGAAATACAATGA  
TGCTCTCCAGATAAATGATACTATCCGAATGGTGGATGCATACAATCACCTAAATAACTTCT  
ACAAGGAAGAGAAGAGTAAGAAGATCCGATGGAGTGATGATGATGATGATGATGATGA  
TGAACCAGCAGTATCAAACAGGATGAAACAGATGAATTTCTAATAGGTTTATTTTCATGCAA  
AGAAGAAACAGCTGAAAGAGTTGGCTAGAAAGCCAGAATATGAAAACGAGAAGCTAATACA  
GTTGCGAAACACTTTAATGGAGGAATTCACGAAGACTGAGGAACCTAGAGGAATTATTTTC  
ACAAAGACTCGGCTAAGTGCCCTTTGCTCTGTTCCAGTGGATTAAGGATAACCCAAAATTTG  
AAGAAGTAGGAATTAAGGCCATTATCTTATTGGTGCTGGACATAACAGTGAAATTAAACCT  
ATGACTCAGAATGAGCAAAGGGAAGTAATTGATAAATTCCGACGTGGAAGTGTAATTTACT  
TATTGCTACTACTGTAGCTGAGGAAGGCCTAGACATCAAAGAGTGTAACATCGTTATTCGC  
TACGGCCTCGTCACCAATGAAATTGCTATGGTGCAGGCTCGTGGCCGAGCTCGAGCTGAT  
GAGAGCACCTATGCACTTGTGGCTTCAAGTGGCTCAGGAGCTGTTGAACGTGAAGATGTTA  
ATATTTTCCGTGAGAAAATGATGTATAAGGCAATTCAGCGTGTCCAGAAGATGCCACAGGA  
AGAGTATTTAAATAAGATTCAGAATTTCCAGTTGCAAAGTATAGTGGAAAAACAAATGAAGA  
CAAAGAGAGATCAGCGCAAGACATACAAGAAAAATCCTTCACTAATAACATTCTATGCAA  
AATTGCCACAAGCTGATATGTTCTGGAGAAGACATACAAGTTATTGAAAACATGCATCATGT  
CAGTGTGAAAAAAGATTTCCAAAGTCTTTACCATACAAGAGAAAAATAAGACACTGCAAGATA  
AGCATGCCGATTACCAGACAAATGGGGAAATTATATGTAAAGATTGTGGACAAGCTTGGGG  
AAACATGATGGTTCACCGAGGTCTTGACCTGCCTTGTCTAAAGATTAGAAATTTTGTGGTTG  
TATTTGAAGACAAGAAAAACAACAAAGCAAATTTTAAAGAAATGGGGTGAAGTGGCCGTC  
GTTCCCTAGTTTTGATTATGCAGCTCACTGTCCTTCAAGTGATGAAGACTAA

>aptenodytes\_patagonicus-md5

ATGGCAGAGGAGTCCCGAGACGAGCGCTTCCTCTACCTGATCTCCTGCTTCAGGCCGCGG  
CTGAAGCAGTTCATCCGGGTGCAGCCGGTGCTGGACCTGCTTCCCTCGCTGAGCGCTGG  
GGACAGGGAGAAGGTGCGGGCGGCCGTGCTGAATCGGGGCGAGGTGGAGGGGGCGGA

GGAGCTGCTGCGGGTCGTCGAGCGGGGGCCCCGCGGGTGCGGCTGGTTCACGAGTTC  
CTGCAGGCGCTGGAGCACGGTGGCTGCAGCCTGGCCGCCTGCTACGTGAACCCCAGCCT  
CAGCCAGCTGCCCTCGGCGGCCGAGGAGGCGGACCATGACCTCTGCGTGCACTTGGTG  
AGCTGCTCCACGGCACACTGGTGGATAGAATGCAGACCATGCAGGTGGCTGAGAAGTGTC  
TGCAGATGGGCATCTTCCAGGACGAGGACCTGGATCGGATCCACACTGTTACTGACAATC  
GTGGGAACAGAGATGGTGCAAGGGAGCTATTGAGCAGAATTGTGCAGAAGAAAGATTGGT  
TCTCTCCTTTTTTGGATTGCTCTGCGTGAAACCCAACATGGAGGCCTTGCAGATGATTTAAGC  
GGAAATACAGGAGGAACAGAGAATAGACAAAATGAGATGAAGAACAGTACAAATGAAGAAA  
CGGAAGTTACAAGCCAACCAGGATATGCCATAGTGGAGGATCTGAAACAGCAAGAAAATGT  
GAATGATAGTTTTAGCAGTGAGAACAGTGTATCGGAAACATCTATTGGAAAGAATTCTATG  
GTTTCAGAGTCAGATGTCTCTACAGGAGATGGAAGTGTCAATAACTTGAATGAAAACCTGG  
GACAGAGCTGCACAACCAGTGATTCAGATGAAGATGAAGTGGAGAGCAGAGCTTCACCTG  
AGCCAGATCTGATTCTGAGAGATTACCAGATGGAAGTTGCAAAGCCAGCACTGAATGGGG  
AGAATATTATAATATGTCTCCCTACAGGCAGTGGTAAAACCAGAGTGGCTGTTTACATTACC  
AAAGATCACTTGGATAAGAAGAAAAGAGCATCAGAGCCTGGAAAAGTTATAGTACTTGTTAA  
TAAGGTACCATTGGTAGAACAGCATTTACGAAAGGAGTTTAATCCATTCTGAAGCGTTGG  
TATCAGGTTATTGGTTTAAAGTGGTGATTCTCAGCTGAAAATCTCATTTCCTGAAGTTGTCAA  
AAGAAATGATGTCATCATCAGTACAGCACAGATCCTTGAGAATTCAGTGTTAAATGCAGCC  
GAAGAAGATGAAGAAGGTGTCCACTTATCAGATTTTTCACTCATCATTATCGATGAGTGTCA  
TCACACCCAAAAGGAAGGTGTCTACAACAATATAATGCGACGTTACTTAAAAGAAAAGATGA  
AGAACAGGAAGCTGGCAAAAGAAAACAAACCACTGATCCCACAGCCTCAGATTCTGGGAC  
TTACAGCCTCACCTGGTGTAGGAGGTGCAACATCCTACTCAAAGCTGAAGAACATATTCT  
GAAAATCTGTGCCAATCTTGATGCATGTAGAATCATGACTGTTGAAGAGCATGCCTCCCAG  
TTGAAGAATCAGGTGAAGGAACCGTATAAGAAGACTGTGATTGCGGATGACAAAAGAAGAG  
ATCCATTTAGAGAGAGAATTACCAAGATCATGACAGACATTCAAACCTATTGCCAGCTCCAT  
CCAAAATCTGAGTTTGGAACTCAGACATATGAACAGTGGGTGATTAGAGAAGAGAGAAAAG  
CTGCAAAAGAAGAAAAACGCAAGGAACGTGTCTGTGCAGAACACTTGAAGAAATACAATGA  
TGCTCTCCAGATAAATGACACCATCCGAATGGTGGATGCGTACAATCACCTAAATAATTTTT  
ATAAGGAGGAGAAAAAGTAAGAAAACAGTAAAGAGTGATGATGATGATGATGATGAACC  
AGCAGTATCAAACAGGATGAAACAGATGAATTTCTAATAGGTTTATTTTCATGCAAAAAAGA  
AACAGCTGAAAGAATTGGCTAGAAAGCCAGAATACGAAAATGAGAAGCTAATACAGCTGCG  
AAACACTCTAATGGAGGAGTTCACGAAGACTGAGGAACCTAGAGGAATTATTTTACAAAG  
ACTCGGCTAAGTGCCTTTGCTCTATTGCAGTGGATTAAGGATAACCCAAAATTTGAAGAAGT  
GGGAATTAAGGCCAGTTATCTTATTGGTGCTGGACACAACAGTGAAATTAACCCATGACT  
CAGAATGAGCAAAGGGAAGTTATTGATAAATTCGAGGTGGAAATGTAAATTTACTTATTGC  
TACTACTGTAGCTGAGGAAGGCCTAGACATCAAAGAGTGTAACATCGTTATTCGCTATGGC  
CTCGTCACCAATGAAATTGCTATGGTGCAGGCTCGCGGTGAGCTCGAGCTGATGAGAGC  
ACCTATGCACTTGTGGCTTCGAGTGGCTCAGGAGCTGTTGAACGTGAAGATGTTAATATTT  
TCCGTGAGAAAATGATGTATAAGGCCATTCAGCGTGTCCAGAAGATGCCACAGGAAGAGTA  
TTAAATAAGATACAGAATTTCCAGTTGCAAAGCATAGTGGA AAAACAAATGAAGGCCAAAGA  
GAGATCGGCACAAGACATACAAGAAAAATCCTTCACTAATAACATTCCTATGCAAAAATTGC  
CACAAGCTGGTATGTTCTGGAGAAGACATACAAGTTATTGAAAACATGCATCATGTCAAGTGT  
GAAAAAAGATTTCCAAAGTCTTTACGATACAAGAGAAAAATAAGACACTGCAAGATAAGCATG  
CCGATTACCAGACAAATGGGGAAATTATATGTAAACATTGTGGACAAGCTTGGGGAAATAT

GATGGTTCACCGAGGTCTTGACCTGCCTTGTCTAAAGATTAGAAATTTTGTGGTTGTGTTTG  
AAGACAAGAAAAACAACAAAGCATATTTTTTAAGAAATGGGGAGAACTGCCCGTCAGGTTCCC  
TAGTTTCGATTATGCAGCTCATTGTCCTTCAAGTGATGAAGATTAA

>apteryx\_owenii-mda5

ATGTCGGAGGAGTCCCGAGTCGAGCGCTTCCTCTACATGATCTCCTGCTTCAGGACGCGG  
CTGAAGCGCGCCATCCGCGTGGACCCCGTGCTGGACTGGCTGCCGTCGCTGAGCGCCGA  
GGAGCGGGAGCGGGTGCGGGCGGCGGCGCTGCAGCGGGGCCAGGTGGAGGCGGCGGA  
GCTACTGCTGCGCGCCGTGGAGCGGCGGCCCGCGACTGCTTCCCCGAGTTCCTGCTGG  
CGCTGGAGCGCGGCGGCTGCGGCCTGGCCGCCAGCTACGTGAACCCCGAGCTCAGCCA  
GCTGCCCTCGCCGGCGGAGGAGGCTGACAACGACCTGTGCGTGCACTTGGTGCAGCTGC  
TCCACGGCACGCTGGTGGATAACATGCGGACCATGCAGGTGGCCGAGAAGTGCCTGCAG  
ACGGACATCTTCCAGGTGGAGGACCTGGAGCGGATCCAGACTGTTACTGAAAGTCGTGGG  
AATAGAGATGGTGCAAGGGAGCTGCTAAGTAGAATAGTTCAGAAGAAGAACTGGTTCTCCC  
CTTTTTTGATTGCTTTGCGTGAAACCCAACATGAAGACCTTGCAGATGATTTAAGTGGAAAT  
ACAGGAGGCGTAGAAAAATAGAGAAAAATGGGATGAATAACAGGACAAATGAAGAAACAGAA  
GTCACAAGGCAACCGGGACATGCTATAGTTGAGGATTTCAAACAGCAAGAAAATACAAATG  
ATAGTTTAGCCAGTGAGAGCGGTGTTTTGGAAAGATCTATTGGAGAGAATTCTGTAGCTTC  
AGAGTCTGATGTCTCAGTAGGAGATGGAAGTGTGAGTAATGTGAATGAAAACCTTGGAAACAG  
AGCAGCAGCACAAACAGTGATTCAGATGAAGATGAAGTGGAGAGCAGAGCTTCACCTGAG  
CCAGAATTGATCCTGAGGGATTACCAGATGGAAGTTGCAAAACCAGCACTGAATGGGGAG  
AATGTTATAATATGTCTCCCTACAGGTAGTGGTAAAACCAGAGTGGCTGTTTACATTACCAA  
AGATCACTTGGATAAGAAGAGAAGAGCATCAGAGCCTGGAAAAGTTATAGTACTTGTTAAT  
AAGGTACCATTGGTGGAACAGCATTACGAAAGGAGTTTCATCCATTCCCTGAAGCGTTGGT  
ATCAGGTTATTGGTTAAGTGGTGATTCTCAGCTGAAAATCTCATTTCCCTGAAGTTGTCAGA  
AGAAACGATGTCATAATCAGCACAGCACAGATCCTGGGGAATTCGCTGCTAAACGCAACTG  
AAGAAGATGAGGAAGGTGTCCATTTATCAGATTTTACACTTATCATTATTGATGAATGTCAT  
CACACTCAAAGGAAGGTGTCTACAACAATATAATGCGACATTACTTAAAAGAAAAGATGAA  
GAATGGGAAGCTGGCAAAAGAAAACAGACCACTCATTCCACAGCCTCAGATTCTGGGACTT  
ACAGCCTCACCTGGTGTAGGAGGTGCAACATCCTCTTTGAAAGCTGAAGAACATATTCTGA  
AAATCTGTGCCAATCTTGATGCGCGTAGAATCATGACTGTTGAAGAGCATGCCTCCCAACT  
GAGGAATCAGGTGAAGGAACCATATAAGAAGACTGTGGTTGCAGATGACAAAAGAAGGGA  
TCCATTTAGAGAGAAAAATTATTGAGATCATGACAGACATTCAAAACTATTGCCAGCTCCATC  
CAAAATCTGAGTTTGGAACTCAGCCCTATGAACAGTGGGTGATTAGAGAGGAGAGAAAAAGC  
GGCAAAAGAAGAAAAACGCAAGGAACGTGTCTGTGCAGAACACTTGAAGAAATACAATGAT  
GCTTTGCAAATAAATGACATTATTCGAATGGTTGATGCATACGATCACCTACGTAACCTTTTAT  
AAGGAGGAAAAAAGCAAAAAACAATAGTGAGTGATGATGAGGATGAACCAGCAGTATCAA  
AACAGGATGAAACCGATGAATTTCTAATAGGTTTGTATGCAAAAAAGAAACAGCTGAAA  
GAGTTGGCTAGAAAGCCCGAATATGAAAATGAGACGCTAACAAAGTTGCGAAACACTTTAA  
TGGAGGAGTTCACAAAGACTAATGAACCAAGAGGAATTATTTTCACAAAGACGCGGCAAG  
TGCTTTGCTCTGCTCCAGTGGATTAAGGATAACCCAAAATTTGAAGAAGTGGGAATTAAG  
GCGCATTATCTTATTGGCGCTGGACACAACAGTGAAACTAAACCTATGACTCAGAATGAGC  
AAAGGGAAGTCATCAGTAAATTCCGAGATGGAAGTGTAACCTTACTCATTGCTACTACTGTA  
GCTGAGGAAGGCCTGGATATCAAGGAGTGTAACATTGTTATTCGCTATGGCCTTGTCACCA  
ATGAAATTGCTATGGTGCAGGCCCGTGGTCGAGCTCGAGCTGATGAGAGCACCTATGCAC



TTGTGGCTTCAAGCGACTCAGGAGCTGTTGAACGTGAGGATGTTAATAGTTTCCGTGAGAA  
AATGATGTATAAGGCCATTTCAGCGTGTCCAGAAGATGCCACAGAAAGAGTACTTAAACAAG  
ATTCAGACCTTCCAGTTGCAAAGTATAATGGAAAAAAGAATGAAGGCCAAAGAGAGATCAAT  
GTAAGACATATAAGAAAAATCCTTCACTAATAAAATTCCTATGCAAAAATTGCCACAAGCTG  
ATATGTTTCAGGAGAAGATATACAAGTTATTGAAAACATGCATCATGTCAGTGTGAAAAAGA  
TTTCCAAAGCCTTTACCATACAAGAGAAAAATAAGACACTGCAAGATAAACATGCTGATTACC  
AGACGAATGGGGAAATTATATGTAAAGACTGTGGACAAGCTTGGGGAAATATGATGGTTCA  
CCGAGGTCTTGACCTGCCTTGTCTAAAGATTAAAAATTTTGTGGTTGTGTTTGAAGACAAGA  
AAACAACAAAGCAAATTTTAAAGAAATGGGGAGAACTGCCAGTCAGGTTCCCTGTTTTTGAT  
TATGCAGGTCATTGTCCTTCAAGTGATGAAGATTAA

>apteryx\_rowi-mda5

ATGTCGGAGGAGTCCCGAGTCGAGCGCTTCTCTACATGATCTCCTGCTTCAGGACGCGG  
CTGAAGCGCGCCATCCGCGTGGACCCCGTGCTGGACTGGCTGCCGTGCTGAGCGCCGA  
GGAGCGGGAGCGGGTGCGGGCGGCGGCGCTGCAGTGGGGCCAGGTGGAGGCGGCGGA  
GCTACTGCTGCGCGCCGTGGAGCGGCGGCCCGCGACTGCTTCCCCGAGTTCCTGCTGG  
CGCTGGAGCGCGGCGGCTGCGGCCTGGCCGCCAGCTACGTGAACCCCGAGCTCAGCCA  
GCTGCCCTCGCCGGCGGAGGAGGCCGACAACGACCTGTGCGTGCAGTGGTGCAGCTGC  
TCCACGGCACGCTGGTGGATAACATGCGGACCATGCAGGTGGCCGAGAAGTGCCTGCAG  
ATGGACATCTTCCAGGTGGAGGACCTGGAGCGGATCCAGACTGTTACTGAAAGTCGTGGG  
AATAGAGATGGTGCAGGGGAGCTGCTAAGTAGAATAGTTCAGAAGAAGAAGTGGTCTCCC  
CTTTTTTGATTGCTTTGCGTAAAACCCAACATGAAGACCTTGCAGATGATTTAAGTGGAAAT  
ACAGGAGGCGTAGAAAATAGAGAAAATGGGATGAATAACAGGACAAATGAAGAAACAGAA  
GTCACAAGGCAACCGGGACATGCTATAGTTGAGGATTTCAAACAGCAAGAAAATACAAATG  
ATAGTTTAGCCAGTGAGAGCGGTGTTTTGGAAAGATCTATTGGAGAGAATTCTGTAGCTTC  
AGAGTCTGATGTCTCAGTAGGAGATGGAAGTGTGAGTAATGTGAATGAAAAGTGGAAACAG  
AGCAGCAGCACAAACAGTGATTCAGATGAAGATGAAGTGGAGAGCAGAGCTTCACCTGAG  
CCAGAACTGATCCTGAGGGATTACCAGATGGAAGTTGCAAAACAGCACTGAATGGGGAG  
AATGTTATAATATGTCTCCCTACAGGTAGTGGTAAAACAGAGTGGCTGTTTACATTACAA  
AGATCACTTGGATAAGAAGAGAAGAGCATCAGAGCCTGAAAAAGTTATAGTACTTGTTAAT  
AAGGTACCATTGGTGGAAACAGCATTTACGAAAGGAGTTTCATCCATTCTGAAGCGTTGGT  
ATCAGGTTATTGGTTTAAAGTGGTGAATTCAGCTGAAAATCTCATTTCTGAAGTTGTCAGA  
AGAAACGATGTCATAATCAGCACAGCACAGATCCTGGGGAATTCGCTGCTAAACGCAACTG  
AAGAAGATGAGGAAGGTGTCCATTTATCAGATTTTACACTTATCATTATTGATGAATGTCAT  
CACACTCAAAGGAAGGTGTCTACAACAATATAATGCGACATTACTTAAAGAAAAGATGAA  
GAATGGGAAGCTGGCAAAAGAAAACAGACCACTCATTCCACAGCCTCAGATTCTGGGACTT  
ACAGCCTCACCTGGTGTAGGAGGTGCAACATCCTCTTTGAAAGCTGAAGAACATATTCTGA  
AAATCTGTGCCAATCTTGATGCACGTAGAATCATGACTGTTGAAGAGCATGCCTCCCAACT  
GAGGAATCAGGTGAAGGAACCATATAAGAAGACTGTGGTTGCAGATGACAAAAGAAGGGA  
TCCATTTAGAGAGAAAATTATCGAGATCATGACAGACATTCAAAGTATTGCCAGCTCCATC  
CAAATCTGAGTTTGGAACTCAGCCCTATGAACAGTGGGTGATTAGAGAGGAGAGAAAAGC  
GGCAAAAGAAGAAAACGCAAGGAACGTGTCTGTGCAGAACACTTGAAGAAATACAATGAT  
GCTTTGCAAATAAATGACATTATTCGAATGGTTGATGCATACGATCACCTACGTAAGTATTTAT  
AAGGAGGAAAAAAGCAAAAAACAATAGTGAGTGATGATGAGGATGAACCAGCAGTATCAA  
AACAGGATGAAACAGATGAATTTCTAATAGGTTTGTATGCAAAAAAGAAACAGCTGAAA

GAGTTGGCTAGAAAGCCCCGAATATGAAAATGAGACGCTAACAAAGTTGCGAAACACTTTAA  
TGGAGGAGTTCACAAAGACTAATGAACCAAGAGGAATTATTTTCACAAAGACCCGGCAAAG  
TGCCTTTGCTCTGCTCCAGTGGATTAAGGATAACCCAAAATTTGAAGAAGTGGGAATTAAG  
GCCCATTATCTTATTGGCGCTGGACACAACAGTGAACTAAACCTATGACTCAGAATGAGC  
AAAGGGAAGTCATCAGTAAATTCCGAGATGGAAGTGTAACCTTACTCATTGCTACTACTGTA  
GCTGAGGAAGGCCTGGATATCAAGGAGTGTAACATTGTTATTCGCTATGGCCTTGTCACCA  
ATGAAATTGCTATGGTGCAGGCCCGTGGTTCGAGCTCGAGCTGATGAGAGCACCTATGCAC  
TTGTGGCTTCAAGCGACTCAGGAGCTGTTGAACGTGAGGATGTTAATAGTTTCCGTGAGCA  
AATGATGTATAAGGCCATTTCAGCGTGTCCAGAAGATGCCACAGAAAGAGTACTTAAACAAG  
ATTCAGACCTTCCAGTTGCAAAGTATAATGGAAGAAAGAATGAAGGCAAAGAGAGATCAAT  
GTAAGACATATAAGAAAAATCCTTCACTAATAAAATTCCTATGCAAAAATTGCCACAAGCTG  
ATATGTTTCAGGAGAAGATATACAAGTTATTGAAAACATGCATCATGTGAGTGTGAAAAAGA  
TTTCCAAAGCCTTTACCATACAAGAGAAAATAAGACACTGCAAGATAAACATGCTGATTACC  
AGACGAATGGGGAAATTATATGTAAAGACTGTGGACAAGCTTGGGGAAATATGATGGTTCA  
CCGAGGTCTTGACCTGCCTTGTCTAAAGATTAAAAATTTTGTGGTTGTGTTTGAAGACAAGA  
AAACAACAAAGCAAATTTTAAAGAAATGGGGAGAACTGCCAGTCAGGTTCCCTGTTTTTGAT  
TATGCAGGTCATTGTCTTCAAGTGATGAAGATTAA

>aquila\_chrysaetos\_canadensis-md5

ATGGCCGCGGAGTCCCGAGACGAGCGCTTCCTCTACATGATCTCCTGCTTCAGGCCGCGG  
CTGAAGCAGGTCATCCGCGTGCAGCCGGTGCTGGACCGGCTTCCCTCGCTGAGCGCGGA  
GGAGAGGGAGAAGGTGCGGGCGGCCGCCCTGCAGCGGGGCGAGGTGGAGGGGGCGGA  
GGAGCTGCTGCGGGCTGTGGAGCGGGGGCCCCGCGGGTGCGGCTGGTTCCACGAGTTC  
CTGCAGGCGCTGGAGCACGGCGGCTGCAGCCTGGCCGCTGCTACGTGAACCCAGCCT  
CAGCCAGCTGCCCTCGCCGGCCGAGGAGGCCGACCACGACCTCTGCGTGCATTTGGTGC  
AGCTGCTCCACAGCACGCTGGTGGATAAAATGCAGACCGTGCAGGTGGCCGAGAAGTGCT  
TGCAGATGGGCATCTTCCAGGACGAGGACCTGGATCGGATCCACACTGTTACTGACAATC  
GTGGGAACAGAGATGGTGCAAGGGAGCTACTGAGCAGAATAGTGCATAAGAAAGATTGGT  
TCTCTCCTTTTTTATTGCTCTGCGTGAAACCCAACATGGAGGCCTTGAGATGATTTAAGC  
GGAAATACAGGAGGAACGGAGAATAGGCCAAAATGGGATGAAGAACAGTACAAACGAAGAA  
ACAGAAGTTACAAGCCAACCAGGATATGCTGTAGTGGAGGATTTGAAACAGCAAGAAAACG  
TGAATGAAAGTTTCAGCAGTGAGAACAGTGTATTGGAAGCATGTATTGGAAAGAATTCTGTA  
GTTTCAGAGTCACATGTCTCCATAGGAGATAGAAGTGTCAGTAATTTGAATGAAAACCTAG  
GACAGAGCTGCACAACCAGTGATTCAGATGAAGATGAAGTGGAGAGCAGAGCTTCACCTG  
AGCCAGATCTGATCCTGAGAGATTACCAGATGGAAGTTGCAAAGCCAGCACTGAATGGGG  
AGAATATTATAATATGTCTCCCTACAGGCAGTGGTAAAACCAGAGTGGCTGTTTACATTACC  
AAAGATCATTTGGATAAGAAGAAAAGAGCATCAGAGCCCGGAAAAGTTATAGTACTTGTTAA  
TAAGGTACCATTGGTAGAGCAGCATTTACGAAAGGAGTTTAATCCATTCCCTGAAGCGTTGG  
TATCAGGTTATTGGTTTAAAGTGGCGATTCTCAGCTGAAAATCTCATTTCCCTGAAGTTGTCAG  
AAGAAATGATGTCATCATCAGTACAGCACAGATTCTTGAGAATTCATTGTTAAATGCAGCCA  
AAGAAGATGAAGAAGGTGTCCAGTTATCAGATTTTTCACTCATCATTATCGATGAGTGTCAT  
CACACTCAAAGGAAGGTGTCTACAACAATATAATGCGACGTTACTTAAAGAAAAGATGAA  
GAACAGGAAGCTGGCAAAAGAAAACAAACCACTGATCCACAGCCTCAGATTCTGGGACTT  
ACAGCCTCACCTGGTGTAGGAGGTGCAACATCCTACTCAAAGCTGAAGAACATATTCTGA  
AAATCTGTGCCAATCTTGATGCATGTAGAATCATGACTGTTGAAGAGCATGCCTCCCAATTG

AAGAATCAGGTGAAGGAACCATATAAGAAGACTGTGATTGCAGATGACAAAAGAAGGGATC  
CATTTAGAGAGAGAATTACTGAGATCATGACAGACATTCAAACTATTGCCAGCTCCATCCA  
AAATCTGAGTTTGGAACCTAGCCATATGAACAGTGGGTGATTAGAGAAGAGAGAAGAGCTG  
CAAAAGAAGAAAAACGCAAGGAACGTGTGTGTGCAGAGCACTTGAAGAAATACAATGATGC  
TCTCCAGATAAATGACACCATCCGAATGGTGGATGCGTACAATCACCTAAATAACTTTTATA  
AGGAGGAGAAAAGTAAGAAGACGGTAAGGAGTGATGATGATGATGATGAACCAGCCGTAT  
CAAAACAGGATGAAACAGATGAATTTCTAATAGCTTTATTTTCATGCAAAAAAGAAACAGCTG  
AAAGAGTTGGCTAGAAAGCCAGAATATGAAAATGAGAAGCTAATACAGTTGCGAAACACTC  
TAATGGAGGAGTTACGAAGACTGAAGAACCTAGAGGAATTATTTTACAAAGACTCGGCT  
AAGTGCCTTTGCTTTATTCCAGTGGATTAAGGATAACCCAAAATTTGAAGAAGTGGGAATTA  
AGGCCATTATCTTATCGGTGCTGGACATAACAGCGAAATTAAACCCATGACTCAGAATGA  
GCAAAGGGAAGTTATTGATAAATCCGAAGTGGAATGTAAATTTACTTATTGCTACTACTG  
TAGCTGAGGAAGGCCTAGACATCAAAGAATGTAACATCGTTATTCGCTATGGCCTCGTCAC  
CAATGAAATTGCTATGGTGCAGGCTCGTGGTCGAGCTCGAGCTGATGAGAGCACCTATGC  
ACTTGTGGCTTCGAGTGGCTCAGGAGCTGTTGAACGTGAAGATGTTAATATTTTCCGTGAG  
AAAATGATGTATAAGGCCATTGAGCGTGTCCAAAAGATGCCGCAGGAAGAGTATTTAAATA  
AGATTCAGAATTTCCAGTTGCAAAGTATAGTGGAAAAACAAATGAAGGCAAAGAGAGATCA  
GTGCAAGACATACAACAAAAATCCTTCACTAATAACATTCCTATGCAAAAATTGCCACAAGC  
TGATATGTTCTGGAGAAGACATACAGGTTATTGAAAACATGCATCATGTCAGTGTGAAAAAA  
GATTTCCAAAGTCTTTACCATACAAGAGAAAAATAAGACACTGCAAGATAAGCATGCCGATTA  
CCAGATAAATGGGGAAATTATATGTAAAGATTGTGGACAAGCTTGGGGAAATATGATGGTT  
CACCGAGGTCTTGACCTGCCTTGTCTAAAGATTAGAAATTTTGTGGTTGTGTTTGAAGACAA  
GAAAACAACAAAGCAAATGTTTAAGAAATGGGGAGAACTGCCTGTCAGGTTCCCTAATTTT  
GATTATGCAGCTCATTGTCTTCAAGTGATGAAGATTAA

>ara\_ararauna-md5

ATGGCAGAGGAGTTGCGAGACGAGCGGTTCTCTACATGATCTCGTGCTTCAGGCCGCGG  
CTGAAGCAGTTCATCCGAGTGCAGCCGGTGCTGGACCGGCTCCCTTCGCTCAGCGCGGA  
CGACAGGGGAGAAGGTGCGGACGGCCGCGCTGCAGCGGGGCGAGGTGGAAGGGGCGGA  
GGAGCTGCTGCGGGGCCGTGGAGCGGGGGCCCCGCGGGTGTGGCTGGTTCCACGAGTTC  
TTGCAGGCGCTGGAGCACGGCGGCTGTGGCATGGCCGCTTGCTACGTGAACCCAGCCT  
CAGCCAGCTGCCCTCGCCGGCTGAGGAGGCCGACCACGACCTCTGCGTGCATTTGGTGC  
AGCTGCTGCATAGCACGCTCGTGGATAGTATGCGGACCGTGCAGGTGGCCGAGAAGTGC  
CTGCAGATGGGCATCTTCCAGGATGAGGACCTGGATGGGATCCATACTGTTACTGACAATC  
GTGGGAACAGAGAAGGTGCAAGGGAGCTATTGAGCAGATTAGTGCAGAAGAAAGATTGGT  
TCTCTCGGTTTTTATTGCTCTGCGTGAAACCCAACATGGAGGCCTTGCAGATGATTTAAG  
TGGAATACAGGAGGAACAAAGGATAAACAAAATGGGATGAAGAACAGTACAAACAAAGAA  
ATGGAAGTTACAAGCCAACCAGGTTATGCCATACTGGAGGATTTGAAGCAGCAGGAAAATA  
TGAATGATAGTTTCAGCACTGAGAACAATTTATTGGAACATCTATTGGAAGAATTCTTTA  
GTTTCAGAGTCAGATGTCTCTATAGGATTTGGAAGTGTGAGTAACTTGAATGAAAACCTGG  
GACAGAGCTGCACAAGCAGTGATTCAGATGAAGAGGAGAGCAGAGCTTCACCTGAGCCAG  
ATCTGGTCCTGAGAGATTACCAGATGGAAGTTGCAAAGCCAGCACTGAATGGGGAGAATAT  
TATAATATGTCTCCCTACAGGCAGTGGTAAAACCAGAGTGGCTGTTTACATTACCAAAGATC  
ATTTGGATAAAAAGAAAAGAGCATCAGAGCCTGGAAAAGTTATAGTCCTTGTTAATAAGGTA  
CCATTGGTAGAACAGCATTTACGAAAGGAGTTTAGTCCATTCTGAAGCGCTGGTATCACA

TTATTGGTTTAAGTGGTGATTCTCAGCTGAAAATCTCATTTCTGAAGTTCTCAGAAGAAAT  
GATGTCATCATCTGTACAGCACAGATCCTTGAGAATTCAGTGCTAAATGCAGACAAAGAAG  
ATGAAGAAGGTGTCCACTTATCAGATTTTTCTACTCATCATTATTGATGAGTGTATCACACT  
CAAAAGGAAGGTGTCTACAACAACATAATGCGACGTTACTTAAAAGAAAAGAAGAACA  
GGAAGCTGGCAAAAGAAAACAAACCACTGATCCCGCAGCCTCAGATTCTGGGACTTACAG  
CCTCACCTGGTGTAGGAGGTGCAACATCCTATTCCAAAGCTGAAGAACATATTCTGAAAAT  
CTGTGCTAATCTTGATGCATGTAGAATCATGACTGTTGAGGAGCATGCCTCCCAGCTGAAG  
AATCAGGTGAAGGAACCTTTTAAGAAGACTGTGATTGCAGATGACAAAAAAGGATCCAT  
TTAGAGAGAGAGTAAGTGAAGATCATGACAGAGATTCAAACCTATTGCCAGCTTCATCCAAAA  
TCTGAGTTTGGAACTCAGCCATATGAGCAGTGGGTGATTAGAGAAGAGAAAAAAGCTGCAA  
AAGAAGAAAAACGCAAGGAACGTGTCTGTGCAGAACACCTGAAGAAATACAATGATGCTCT  
CCAGATAAATGATACCATCCGAATGGTAGATGCGTACAATCACCTGAATAACTTTTATAAGG  
ATGAGAAAAGTAAGAAGACAGAAAGGAGTGATGATGATGACGATGCACCAGCAGTATCAAA  
ACAGGATGAAACAGATTTATTTCTAATAGGTTTATTTTCATGCAAAAAAGAAACAGCTGAAAG  
AGTTGGCTAGAATGCCAGAATATGAAAATGAAAAGCTAACACAGTTGCGAAACACTTTAATG  
GAGGAGTTACGAAGACTGAGGCACCTAGAGGAATTATTTTACAAAGACCCGGCTAAGT  
GCTTTTGCTCTGTTCCAGTGGATTAAGGATAACCCAAAATTTGAAGAAGTGGGAATTAAGG  
CCCATTATCTTATTGTTTCTGGACATAACAGTGAAATGAAACCCATGACTCAGAATGAGCAG  
CGGGAAGTTATTGATAAATTCCGAGGTGGAAATTTGAATTTACTTATTGCTACTACTGTAGC  
TGAGGAAGGCCTAGACATCAAAGAGTGTAACATTGTTATTTCGCTATGGCCTCGTCACCAAT  
GAAATTGCTATGGTGCAGGCTCGTGGTCGAGCTCGAGCTGATGACAGCACCTATGCACTT  
GTGGCTTCGAGTGGCTCAGGAGCTGTTGAACGTGAAGATGTTAATATTTTCCGTGAGAAAA  
TGATGTATAAAGCCATTCAGCATGTCCAGAAGATGCCACAGGAGGAGTATTTAAAGAAGAT  
TCAGAATTACAGTGTCAAAGTATAGTGGAAGAAAGAAATGAAGGCAAAGAGACATCAGCAC  
AAGACATACAAGAAAAATCCTTCACTAATATCATTCTATGCAAAAATTGCCACAAGCTGGT  
ATGTTCTGGGGAAGACATACGAGTTATTGAAAACATGCATCATGTCAGTGTGAAAAGAGAT  
TTCCAAAGTCTTTACCATACAAGAGAAAATAAGACGCTGCAAGATAAGAATGCTGATTACCA  
GATAAATGGAGAAGTTATATGTAAAGATTGTGGACAAGCTTGGGGAATATGATGGTTCAC  
CGAGGTCTTGATCTGCCTTGTCTAAAGATTATAAATTTTGATTTGTGTTTGAAGACAAGAA  
AAGAAAAGAAATTTTTAAGAAATGGAGAGAGCTGTCCATCAAGTTCCCTGTTTTGATTATG  
CAGCTCATTGTCCTTCAAGTGATGAAGATTAA

>aratinga\_solstitialis-mda5

ATGGCAGAGGAGTTAAGAGACGAGCGGTTCTCTACATGATCTCGTGCTTCAGGCCGCGG  
CTGAAGCAGTTCATCCGAGTGCAGCCGGTGCTGGACCGGCTCCCTTCGCTCAGCGCGGA  
CGACAGGGAGAAGGTGCGGACGGCCGCGCTGCAGCGGGGCGAGGTGGAAGGGGCGGA  
GGAGCTGCTGCGGGCCGTGGAGCGGGGGCCCCGCGGGTGTGGCTGGTTCCACGAGTTC  
TTGCAGGCGCTGGAGCACGGCGGCTGTGGCATGGCCGCTTGCTACGTGAACCCAGCCT  
CAGCCAGCTGCCCTCGCCGGCTGAGGAGGCCGACCACGACCTCTGCGTGCATTTGGTGC  
AGCTGCTCCATAGCACGCTCGTGGATAGTATGCGGACCGTGCAGGTGGCCGAGAAGTGC  
CTGCAGATGGGCATCTTCCAGGATGAGGACCTGGATGGGATCCATACTGTTACTGACAATC  
GTGGGAACAGAGAAGGTGCAAGGGAGCTATTGAGCAGATTAGTGCAGAAGAAAGATTGGT  
TCTCTCGGTTTTTTGATTGCTCTGCGTGAAACCCAACATGGAGGCCTTGAGATGATTTAAG  
TGGAATAACAGGAGGAACAAAGGATAAACAATAATGGGATGAAGAACAGTACAAACAAGAA  
ATAGAAGTTACAAGCCAACCAGGTTATGCCATACTGGAGGATTTGAAGCAGCAGGAAAATA

TGAATGATAGTTTCAGCAGTGAGAACAATTTATTGAAACATCTATTGAAAGAATTMTTTA  
GTTTCAGAGTCAGATGTCTCTATAGGATTTGGAAGTGTGAGTAACTTGAATGAAAACCTGG  
GACAGAGCTGCACAAGCAGTGATTCAGATGAAGAGGAGAGCAGAGCTTCACCTGAGCCAG  
ATCTGGTCCTGAGAGATTACCAGATGGAAGTTGCAAAGCCAGCACTGAATGGGGAGAATAT  
TATAATATGTCTCCCTACAGGCAGTGGTAAAACCAGAGTGGCTGTTTACATTACCAAAGATC  
ATTTGGATAAAAAGAAAAGAGCATCAGAGCCTGGAAAAGTTATAGTCCTTGTTAATAAGGTA  
CCATTGGTAGAACAGCATTTTACGAAAGGAGTTTAGTCCATTCTGAAGCGCTGGTATCACA  
TTATTGGTTTAAGTGGTGATTCTCAGCTGAAAATCTCATTTCTGAAGTTGTCAGAAGAAAT  
GATGTCATCATCTGTACAGCACAGATCCTTGAGAATTCAGTCTAAATGCAGACAAAGAAG  
ATGAAGAAGGTGTCCACTTATCAGATTTTTCTCATCATCATTATTGATGAGTGTATCACA  
CAAAAGGAAGGTGTCTACAACAACATAATGCGACGTTACTTAAAAGAAAAGAAGAACA  
GGAAGCTGGCAAAAGAAAACAAACCACTGATCCCGCAGCCTCAGATTCTGGGACTTACAG  
CCTCACCTGGTGTAGGAGGTGCAACATCCTATTCCAAAGCTGAAGAACATATTCTGAAAAT  
CTGTGCTAATCTTGATGCATGTAGAATCATGACTGTTGAGGAGCATGCCTCCAGCTGAAG  
AATCAGGTGAAGGAACCTTTTAAGAAGACTGTGATTGCAGATGACAAAAAAGGATCCAT  
TTAGAGAGAGAGTAACTGAGATCATGACAGAGATTCAAACCTATTGCCAGCTTCATCCAAA  
TCTGAGTTTGGAACTCAGCCATATGAGCAGTGGGTGATTAGAGAAGAGAAAAAGCTGCAA  
AAGAAGAAAAACGCAAGGAACGTGTCTGTGCAGAACACCTGAAGAAATACAATGATGCTCT  
CCAGATAAATGATACCATCCGAATGGTAGATGCGTACAATCACCTGAATACTTTTATAAGG  
ATGAGAAAAGTAAGAAGACAGAAAGGAGTGATGATGATGACGATGCACCAGCAGTATCAAA  
ACAGGATGAAACAGATTTATTTCTAATAGGTTTATTTTCATGCAAAAAAGAAACAGCTGAAAG  
AGTTGGCTAGAATGCCAGAATATGAAAATGAAAAGCTAACACAGTTGCGAAACACTTTAATG  
GAGGAGTTCACGAAGACTGAGGCACCTAGAGGAATTATTTTACAAAGACCCGGCTAAGT  
GCTTTTGCTCTATTCCAGTGGATTAAGGATAACCCAAAATTTGAAGAAGTGGGAATTAAGGC  
CCATTATCTTATTGGTTCTGGACATAACAGTGAAATGAAACCCATGACTCAGAATGAGCAGC  
GGGAAGTTATTGATAAATTCCGAGGTGGAAATTTGAATTTACTTATTGCTACTACTGTAGCT  
GAGGAAGGCCTAGACATCAAAGAGTGTAACATTGTTATTCGCTATGGCCTCGTCACCAATG  
AAATTGCTATGGTGCAGGCTCGTGGTCGAGCTCGAGCTGATGACAGCACCTATGCACTTG  
TGGCTTCGAGTGGCTCAGGAGCTGTTGAACGTGAAGATGTTAATATTTTCCGTGAGAATAT  
GATGTATAAAGCCATTACAGCATGTCCAGAAGATGCCACAGGAGGAGTATTTAAAGAAGATT  
CAGAATTACAGTGTCAAAGTATAGTGGAAAAAGAAATGAAGGCAAAGAGACATCAGCACA  
AGACATACAAGAAAAATCCTTCACTAATATCATTCTATGCAAAAATTGCCACAAGCTGGTA  
TGTTCTGGGGAAGACATACGAGTTATTGAAAACATGCATCATGTCAGTGTGAAAAGAGATTT  
CCAAAGTCTTTACCATACAAGAGAAAAATAAGACGCTGCAAGATAAGAATGCTGATTACCAG  
ACAAATGGAGAAGTTATATGTAAAGATTGTGGACAAGCTTGGGGAATATGATGTTTCACC  
GAGGTCTTGATCTGCCTTGTCTAAAGATTATAAATTTTGTGATTGTGTTTGAAGACAAGAAA  
ACAATAAAAGAAATTTTTAAGAAATGGAGAGAGCTGCCCATCGAGTTCCTGGTTTTGATTA  
TGCAGCTCATTGTCCTTCAAGTGATGAAGATTAA

>asio\_otus-mda5

ATGGCGAAGGAGTCCCGAGACGAGCGCTTCCTCTACATGATCTCCTGCTTCAGGCCGCGG  
CTGAAGCAGTTCATCCGGGTGCAGCCGGTGCTGGACCAGCTTCCCTCGCTGAGCGCGGA  
GGAGAGGGGAGAAGGTGCGGGGCGGCCGCCCTGCAGCGGGGCGAGGTGGAGGGGGCGGA  
GGAGCTGCTGCGGGCCGTGGAGCGGGGCCCGCGGGTGCAGGCTTGTCCACGAGTTC  
CTGCAGGCGCTGGAGCACGGCGGCTGCAGCCTGGCCGCCTGCTACGTGAACCCAGCCT

CAGCCAGCTGCCCTCGCCGGCCGAGGAGGCTGACCACGACCTCTGTGTGCAATTGGTGC  
AGCTGCTCCACAGCACACTGGTGGATAGAATGCAGACGATGCAGGTGGCCGAGAAGTGC  
CTAGAGATGGGCATCTTCCAGGACGAGGACATGGACCGGATCCACGCTGTTACTGACAAT  
CGTGGGAACAGAGAGGGTGCAAGGGAGCTATTGAGCAGAATAGTGCAGAAGAAAAGATTGG  
TTCTCTCCTTTTTTATTGCTCTGCGTGAAACCCAACATGAAGGCCTTGACAGATGATTTAAG  
TGGAATACAGGAGGAACAGAGATTAGACAAAATGGGATGAAGAACTGTACAAATGAAGAA  
ACAGAAGTTGCAAGCCAACCAGGATATGCTGTAGTAGAGGACTTGAAACAGCAAGAAAATG  
TGAATGATAGTTTCAGCAGTGAGAACAGTGTTTTGGAAACATCTATTGGAAAGAATTCTGTA  
GTTTCGGAGTCAGATGTCTCCTTAGGAGATGGAAGTGTGAGTAAGTTGGATGAAAACCTGG  
GACAGAGCTGCACAACCAGCGATACAGATGAAGATGAAGTGGAGAGCAGAGCTTCACCTG  
AGCCAGATCTGATCCTGAGAGATTACCAGATGGAAGTTGCAAAGCCAGCACTGAATGGGG  
AGAATATTATCATATGTCTCCCTACAGGCAGTGGTAAAACCAGAGTGGCTGTTTACATTACC  
AAAGATCACTTGGATAAGAAGAAAAGAGCATCAGAGCCCGGAAAAGTTATAGTACTTGTTA  
ATAAGGTACCACTGGTAGAACACATTTACGAAAGGAGTTTACTCCGTTTCTGAAGCGTTG  
GTATCAGGTTATTGGTTTAAGTGGTGATTCTCAACTGAAAATCTCATTTTCTGAAGTTGTCA  
GAAGAAATGATGTCATCATCAGTACAGCACAGATCCTTGAGAATTCAGTGTTAAATGCAGC  
CAAAGAAGATGAAGAAGGTGTCCACTTATCAGATTTTTCACTTATCATTATCGATGAGTGTC  
ATCACACTCAAAGGAAGGTGTCTACAACAATATAATGCGACGTTACTTAAAAGAAAAGATG  
AAGAACAGGAAGCTGGCAAAGAAAACAAACCACTGATCCCGCAGCCTCAGATTCTGGGA  
CTTACAGCCTCACCTGGTGTAGGCGGTGCAACATCCTACTCAAAGCTGAAGAACATATTC  
TGAAAATCTGTGCCAATCTTGATGCATGTAGAATCATGACTGTTGAAGAGCATGCCTCCCA  
GCTGAAGAATCAGGTGAAGGAACCATATAAGAAGACTGTGATTGCAGATGACAAGAGAAG  
GGATCCATTTAGAGAGAGAATTACTGAGATCATGACAGGCATTCAAACCTATTGCCAGCTC  
CATCCAAAATCTGAGTTTGGAACTCAGCCATATGAACAGTGGGTGATCAGAGAAGAAAGGA  
AAGCTGCAAAGAAGAAAAACGCAAGGAACGTGTCTGTGCAGAGCACTTGAAGAAATACAA  
TGATGCTCTCCAGATAAATGACACCATCCGAATGGTGGATGCGTACAATCACCTAAATAAC  
TTTTATAAGGAGGAGAAAAGTAAGAAGATGGTAAGGAGTGATGATGATGATGATGAACCAG  
CAGTATCAAACAGGATGAAACAGATGAATTTCTAATAGGTTTATTTTCATGCAAAAAGAAA  
CAGCTGAAAGAGTTGGCTAGAAAACCAGAATATGAAAATGAGAAGCTAATACAGTTGCGAA  
ACACTTTAATGGAGGAGTTCACGAAGACTGAAGAACCTAGAGGAATTATTTTCACAAAGACT  
CGGCTAAGTGCTTTTGCTCTATTCCAGTGGATTAAGGATAACCCAAAATTTGAAGAAGTGG  
GAATTAAGGCCATTATCTTATCGGTGCTGGACATAACAGTGAAATTAACCCATGACTCAG  
AATGAGCAAAGGGAAGTTATTGATAAATTCCGAGGTGGAAATGTAAATTTACTTATTGCTAC  
TACTGTAGCTGAGGAAGGCCTAGATATCAAAGAGTGTAACATCGTTATTAGCTATGGCCTC  
ATCACCAATGAAATTGCTATGGTGCAGGCTCGTGGTTCGAGCTCGAGCTGATGAGAGCACC  
TATGCACTTGTGGCTTCAAGTGGCTCAGGAGCTGTTGAACGTGAAGATGTTAATATTTTCC  
GTGAGAAAATGATGTATAAGGCCATTACGCGTGTCCAGAAGATGCCGCAGGAAGAGTATT  
AAAGAAGATTGATAATTTCCAGTGGCAAAGTATAGTAGAAAAACAAATGAAGGCAAAGAGA  
GATCAGTGCAAGCCATACAAGAAAAATCCTTCACTAATAACATTCTTATGCAAAAATTGCCA  
CAAGCTGATATGTTCTGGAGAAGACATACAAGTTATTGAAAAGATGCATCATGTGAGTGTA  
AAAAAGACTTCCAAAGTCTTTACCATACAAGAGAAAATAAGACACTGCAAGATAAACATGCC  
GATTACCAGACAAATGGAGAAATTATATGTAAAGATTGTGGACAAGCTTGGGGAAATATGAT  
GGTTCACCGAGGTCTCGACCTGCCTTGTCTAAAGATTAGAAATTTTGTGGTTGTGTTTGA  
GACAAGAAAACAACAAAGCAAATTTTTAAGAAATGGGGAGAACTGCCCATCATGTTCCCTA

GTTTTGATTATGCAGCTCATTGTCCTTCAAGCGATGAAGATTAA

>athene\_cunicularia-md5

ATGGCGAAGGAATCCCGAGACGAGCTCTTCCTCTACATGATCTCCTGCTTCAGGCCGCGG  
CTGAAGCAGTTCATCCGGGTGCAGCCGGTGCTGGACCAGCTTCCCTCGCTGAGCGCGGA  
GGAGAGGGAGAAGGTGCGGGCGGCCGCCCGGCATGGGGGCGAGGTGGAGGGGGCGGA  
GGAGCTGCTGCGGGCCGTGGAGCGGGGCCCGCGGGTGC GGCTGGTTCCACGAGTTC  
CTGCAGGCGCTGCAGCACGGCGGCTGCACCCTGGCCGCCTGCTACGTGAACCCAGCCT  
CAGCCAGCTGCCCTCGCCGGCCGAGGAGGCCGACCACGACCTCTGCGTGCACTTGGTGC  
AGCTGCTCCACAGCACACTGGTGGATAGAATGCAGACCATGCAGGTGGCCGAGAAGTGCC  
TAGAGATGGGCATCTTCCAGGACGAGGACATGGATCAGATCCACACTGTTACTGACAATCG  
TGGGAACAGAGAGGGTGCAAGGGAGCTATTGAGCAGAATAGTGCAGAAGAAAGATTGGTT  
CTCTCCTTTTTTGATTGCTTTGCGTGAAACCCAACATGGAGGCCTTGCGATGATTTATGTG  
GAAATACAGGAGGAACAGAGAATAGACAAAATGAGGTGAAGAACTGTACAAACGAAGAAAC  
AGAAGTTGCAAGCCAACCAGGATATGCTGTAGTAGAGGAGTTGAAACAGCATGAAAATGTG  
AATGATAGTTTCATCAGTGAAAACAATGTATTGAAACATCTGTTGAAAGAGTTCTGTAGT  
TTCAGAGTCAGATGTCTCCATAGGAGATGGAAGTGTGAGTAACCTGGATGAAAACCTGGGA  
CAGAGCTGCACAACCAGTGATACAGATGAAGATGAAGTGGAGAGCAGAGCTTCACCTGAG  
CCAGATCTGATCCTGAGAGATTACCAGATGGAAGTTGCAAAGCCAGCACTGAATGGGGAG  
AATATTATCATATGTCTCCCTACAGGCAGTGGTAAAACCAGAGTGGCTGTTTACATTACCAA  
AGATCACTTGGATAAGAAGAAAATTGCATCAGAGCCTGGCAAAGTTATAGTACTTGTTAATA  
AGGTACCACTGGTAGAACAACATTTACGAAAGGAGTTTAATCCATTCCTGAAGCGTTGGTA  
TCAGGTTATTGGTTTAAGTGGTGATTCTCAGCTGAAAATCTCATTTCTGAAGTTCTCAGAA  
GAAATGATGTCATCATCAGTACAGCACAGATCCTTGAGAATTCAGTGTTAAATGCAGCCAAA  
GAAGACGAAGAAGGTGTCCACCTATCAGATTTTTCACTTATCATTATTGATGAGTGTATCA  
CACTCAAAAGGAAGGTGTCTACAACAATATAATGCGACGATACTTAAAAGAAAAGATGAAG  
AACAGGAAGCTGGCAAAAGAAAACAAACCACTGATCCCGCAGCCTCAGATTCTGGGACTTA  
CAGCCTCACCTGGTGTAGGAGGTGCAACATCCTACTCAAAAGCTGAAGAACATATTCTGAA  
AATCTGTGCCAATCTGGATGCATGTAGAATCATGACTGTTGAAGAGCATGCATCCCAGCTG  
AAGAATCAGGTGAAGGAACCATATAAGAAGACTGTGATTGCAGATGATGAGAGAAGGGATC  
CATTTAGAGAGAGAATTACTGAGATCATGACAAGCATTCAAACTATTGCCAGCTCCATCCA  
AAATCTGAGTTTGGAACCTAGCCATATGAACAGTGGGTGATCAGAGAAGAGAGGAAAGCT  
GCAAAAGAAGAAAAACGCAAGGAACGTGTCTGTGCAGAGCACTTGAAGAAATACAATGATG  
CTCTCCAGATAAATGACACCATCCGAATGGTGGATGCATACAATCACCTAAATAACTTTTAT  
AAGGAGGAGAAAAAGTAAGAAGATGGTAAGGAGTGATGATGATGATGATGAACCAGCA  
GTATCAAAACATGATGAAACAGATGAATTTCTAATAGGTTTATTTATGCAAAAAAGAAACA  
GCTGAAAGAGTTGGCTAGAAAACCAGAATATGAAAATGAGAAGTTAATACAGTTGCGAAAC  
ACTTTAATGGAGGAGTTCACGAAGACTGAAGAACCTAGAGGAATTATTTTACAAAGACTC  
GGCTAAGTGCTTTTGCTCTATTCCAGTGGATTAAGGATAACCCCAAATTTGAAGAAGTGGG  
AATTAAGGCCCATATTCTTATTGGTGCTGGACATAAGAGTGAAATTAACCCATGACTCAGA  
ATGAGCAAAGGGAAGTTATTGATAAATCCGAGGTGGAAATGTAAATTTACTTATTGCTACT  
ACTGTAGCTGAGGAAGGCCTAGACATCAAAGAGTGTAACATTGTTATTGCTATGGCCTTG  
TCACCAATGAAATTGCTATGGTGCAGGCTCGTGGTCGAGCTCGAGCTGATGAGAGCACCT  
ATGCACTTGTGGCTTCAAGTGGCTCAGGAGCTGTTGAACGTGAAGATGTTAATATTTCCG  
TGAGAAAATGATGTATAAGGCCATTCAGCGTGTCCAGAAGATGCCTCAGGAAGAGTATTTA

AATAAGATTACACAATTTCCAGTTGCAAAGTATAGTAGAAAAAAAATGAAGGCCAAAGAGAGA  
TCAGTGCAAGACATACAAGAAAAATCCTTCACTAATAACATTCTTATGCAAAAATTGCCACA  
AGCTGGTATGTTCTGGAGAAGACATACAAGTTATTGAAAAGATGCATCATATCAGTGTGAAA  
AAAGACTTCAAAAAGTCTTTACCATACAAGAGAAAAATAAGACACTGCAAGATAAACATGCCGA  
TTACCAGACCAATGGAGAAATTATATGTAAAGATTGTGGACAAGCTTGGGGAAATATGATG  
GTTACCCGAGGTCTTGACCTGCCTTGTCTAAAGATTAGAAATTTTGTGGTTGTGTTTGAAGA  
CAAGAAAACAACAAAGCAAATTTTTAAGAAATGGGGAGAACTGCCCATCATGTTCCCTAGTT  
TTGATTATGCAGCTCATTATCCTTCAAGTGATGAAGATTAA

>aythya\_fuligula-mds5

ATGTCGACGGAGTGCCGAGACGAGTGCTTCCTCTACATGATCTCCTGCTTCAGGCCGCGG  
CTGAAGCAATACATCCGGGTGCTGCCGGTGCTGGACTGGCTGCCCTCGCTGAGCCGGGA  
GGAGAAGGAGAAGGTGCGGGTGCTGGCGGAGCAGAGGGGGCGATGTGGAGGGGGCCGA  
GGAGCTGCTGCGCGCCGTGGAGCGCGGCCCGCGACCAAGGTTGGTTTCTGAGTTTCG  
TGCAGGCGCTGGAGAACAGCGGCTGCAACCTGGCTGCCAGCTACGTGAACCCAGCCAG  
CTGCCCTCGCCACCGAGGAGGCTGACCACGACCTCTGTGTGCAGTTGGTGCAGCTGCT  
CCACGCCACCCTAGTGGATAAGATGCGGGCCAGGCAGGTGGCCGAGATGTGCCTGCAGA  
TGAACATTTTCCAGGAGGAGGACCTGGAACGGATCAGTGCTGTTACTGAAACTCGTGGGA  
ACAGAGATGGTGCAAGAGAGCTATTGAGTAGAATAGTGACAGAAAAAGGATTGGTTCTCTCC  
TTTCTTGGTTGCTCTGCGTCAAACACAACATGAAGACCTTGACAGATGATTTAAGCGGAAATA  
CAGGAGGAAAAAGATAATAAAGGAAACGGGGTGAAGAACAGTACAAACAAAGAAACAGAAG  
CTGCAAGCCAACCAGGACATTCTGGAGTGAAGGATTTGAAACAGCAAGAAAATCTGAATAG  
TGGTTCTGTCAAGTGAAGTGGTGTATTGGAACATCTGTTGAAAAGATTCTGTAGTTTTGG  
AATCGGATGTCACTACAGAAGATAGAAGTGTCAGTAACATGAATGAAACCTGGGACAGAG  
CAGTACAACCAGTAATTCAGATGAAGATGAAATGGAGAGCAGAGCTTCACCTGAACCAGAT  
CTGATACTGAGAGACTACCAGATGGAAGTTGCAAAGCCAGCACTGAATGGGGAGAATATTA  
TAATATGTCTCCCTACAGGCAGTGGTAAACAGAGTGGCTGTTTATATTACCAAAGATCAT  
TTGGATAAGAAAAAAGAGCATCAGAACCTGGAAAAGTTATAGTACTTGTTAATAAGGTACC  
GTTAGTGGAACAGCATTACGAAAAGAGTTTAAATCCATTCTGAAACGTTGGTATCAGGTTA  
TTGGTTTAAAGTGGTGAATCTCAGCTGAAAATCTCATTTCCTGAAGTTGTCAGAAGATATGAT  
GTAATCATCAGTACAGCACAGATTCTTGAGAATTCAGTGTAAATGCAACTGAAGAAGATGA  
AGAAGGTGTCCACTTATCAGATTTTTCACTCATCATTATTGATGAGTGTGCATCACACTCAA  
AGGAAGGCGTCTACAACAATATAATGCGACGTTACATAAAAGAAAAGATGAAGAACAGAAA  
ACTGGCAAAAGAAAACAAACCATTGATTCCACAGCCTCAGATTCTGGGACTTACAGCCTCA  
CCTGGAGTAGGAGGTGCAAATCCAAACCCAAAAGCTGAAGAACATATTCTAAAAATCTGTG  
CCAATCTTGATGCACGTAGAATCATGACTGTTGAAGAACATGCCTCCCAACTGAAAAATCA  
GGTGAAGGAGCCATTTAAGAAGACCGTGATTGCAGATGACAAAAGAAAGGATCCATTGAGA  
GAAAGAATTATTGAGATCATGACAGATATTCAAACCTATTGCAAACCTCTATCCAAAATCTGA  
GTTTGGATCTCAGCCGTATGAACAGTGGGTGATTAGAGAAGAGAAAAAAGCTGCAAAGGAA  
GAAAAACGCAAGGAACGTGTCTGTGCAGAACACTTGAAGAAATATAATGATGCTCTGCAAA  
TTAATGACACTATCCGAATGGTTCGATGCATACAATCACCTAAATAACTTTTATAAGGAGGAA  
AAAAGCAAGAAAACAATAGGGAGTGATGATGATGAACCAGCAGTATCAAACAGGATGAAA  
CAGATGAATTTCTAATAGATTTATTTTCATGCAAAAAAGAAACAGCTAAAAGAGTTGGCTAGA  
AAGCCAGAATATGAAAATGAGAACTGATAAAGTTGCGAAACACTTTAATGGAAGAGTTCAC  
AAAGACTAAAGAACCCAGAGGAATTATTTTCACAAAGACTCGGCAAAGTGCTTTTGCCTTAT



TCCAGTGGATTATGGATAACCCAAAATTTGAAGAAGTGGGGATTAAGGCTCATTATCTTATT  
GGTGCTGGACACAACAGTGAAACTAAACCCATGACTCAGAATGAGCAAAGGGAAGTCATT  
GATAAATTTTCGAGGTGGAAGTGTAATTTACTTATTGCTACTACTGTAGCTGAAGAAGGCCT  
GGACATCAAAGAGTGTAACATTGTTATTCGCTATGGCCTTGTCCTAATGAAATTGCTATGT  
TGCAGGCCCCGTGGTCGAGCTCGAGCTGATGAGAGCACCTATGCACTTGTGGCTTCGAGTG  
GCTCAGGAGCTGTTGAACGTGAAGACGTAAATATTTACCGTGAGAAAATGATGTATAAGGC  
CATTCAGCGTGTCCAGAGGATGCCGCAGGAAGAATATTTAAATAAGATTGAGAGCTTCCAG  
TTGCAGAGTATAATGGAAAAACAAATGAAGGCCAAAAGAGATCAGCGTAAAACATATAAGA  
AAAACCCCTTCACTAATAACATTCCTATGCAAGAATTGCCACAAGCTGATATGTTCCAGGAGAA  
GATATACAAGTTATTGAAAACATGCATCATGTCAGCGTGAAAAAAGATTTCCAACATCTTTA  
CCATACAAGAGAAAAATAAGACACTGCAAGATAAACATGCTGATAACCAGACAAATGTGGAA  
ATTATATGTAAAGATTGTGGACAAGCTTGGGGAAATATGATGGTTCACCGAGGTCTTGACC  
TGCCTTGTCTAAAGATTAGAAATTTTGTGGTTGTTTTTGAAGACAAGAAAGCAACAAAGGAA  
ATTTTTAAGAAATGGGTAGAACTGCCCATCAGGTTCCCCAGTTTTGACTATGCAGCTCATTG  
TCCTTCAAGTGATGAAGACTGA

>bubo\_blakistoni-md5

ATGGCGAAGGAGTCCCGAGACGAGCGCTTCCTCTACATGATCTCCTGCTTCAGGCCGCGG  
CTGAAACAGTTCATCCGGGTGCAGCCGGTACTGGACCAGCTTCCCTCGCTGAGCGCGGA  
GGAGAGGGGAGAAGGTGCGGGCGGCCGCCCTGCAGCGGGGCGAGGTGGAGGGGGCGGA  
GGAGCTGCTGCGGGCCGTGGAGCGGGGCCCGCGGGTGCAGCTGTTCTACGAGTTC  
CTGCAGGCGCTGGAGCACGGCGGCTGCAGCCTGGCTGCCTGCTACGTGAACCCAGCCT  
CAGCCAGCTGCCCTCGCCGGCCGAGGAGGCCGACCACGACCTCTGTGTGCACTTGGTGC  
AGCTGCTCCACAGCACACTGGTGGATAGAATGCAGACCATGCAGGTGGCCGAGAAGTGCC  
TAGAGATGGGCATCTTCCAGGACGAGGACATGGACCGGATCCACGCTGTTACTGACAATC  
GTGGGAACAGAGAGGGTGCAAGGGAGCTGTTGAGCAGAATAGTGCAGAAGAAAGATTGGT  
TCTCTCCTTTTTTATTGCTCTGCGTGAAACCCAACATGGAGGCCTTGCAGATGATTTAAGT  
GGAAATACAGGAGGAACAGAGAATAGACAAAATGGGATGAAGAACTGTACAAACGAAGAA  
ACAGAAGTTGCAAGCCAGCCAGGATATGCTGTAGTAGAGGACTTGAAACAGCAAGAGAAT  
GTGAATGATAGTTTCAGCAGTGAGAACAGTGTTTTGGAAACATCTATTGGAAAGAATTCTGT  
AGTTTCAGAGTCAGATGTCTCCTTAGGAGATGGAAGTGTGAGTAACTTGGATGAAACCTG  
GGACAGAGCTGCACAACCAAGTGATACAGATGAAGATGAAGTGGAGAGCAGAGCTTCACCT  
GAGCCAGATCTGATCCTGAGAGATTACCAGATGGAAGTTGCAAAGCCAGCACTGAATGGG  
GAGAATATTATCATATGTCTCCCTACAGGCAGTGGTAAAACCAGAGTGGCTGTTTACATTAC  
CAAAGATCACTTGGATAAGAAGAAAAGAGCATCAGAGCCCGGAAAAGTTATAGTACTTGTT  
AATAAGGTACCACTGGTAGAACAACATTTACGAAAGGAGTTTACTCCATTCTGAAGCGTT  
GGTATCAGGTTATTGGTTAAGTGGTGATTCTCAACTGAAAATCTCATTTCTGAAGTTGTC  
AGAAGAAATGATGTCATCATCAGTACAGCACAGATCCTTGAGAATTCAGTGTAAATGCAGC  
CAAAGAAGATGAAGAAGGTGTCCACTTATCAGATTTTTTCACTTATCATTATCGATGAGTGTC  
ATCACACTCAAAGGAAGGTGTCTACAACAATATAATGCGACGTTACTTAAAAGAAAAGATG  
AAGAACAGGAAGCTGGCAAAGAAAACAAACCACTGATCCCGCAGCCTCAGATTCTGGGA  
CTTACAGCCTCACCTGGTGTAGGCGGTGCAACATCCTACTCAAAGCTGAAGAACATATTC  
TGAAAATCTGTGCCAATCTTGATGCGTGTAGAATCATGACTGTTGAAGAGCATGCCTCCCA  
GCTGAAGAATCAGGTGAAGGAACCATATAAGAAGACTGTGATTGCAGATGACAAGAGAAG  
GGATCCATTTAGAGAGAGAATTACTGAGATCATGACAGGCATTCAAACACTATTGCCAGCTC

CATCCAAAATCTGAGTTTGGAACTCAGCCATATGAACAGTGGGTGATCAGAGAAGAGAGGA  
AAGCTGCAAAAGAAGAAAAACGCAAGGAACGTGTCTGTGCAGAGCACTTGAAGAAATACAA  
TGATGCTCTCCAGATAAATGACACCATCCGAATGGTGGATGCATACAATCACCTAAATAACT  
TTTATAAGGAAGAGAAAAAGTAAGAAGATGGTAAGGAGTGATGATGACGATGATGATGAACC  
AGCAGTATCAAAACAGGATGAAACAGATGAATTTCTAATAGGTTTATTTTCATGCAAAAAAGA  
AACAGCTGAAAGAGTTGGCTAGAAAACCGAATATGAAAATGAGAAGCTAATACAGTTGCG  
AAACACTTTAATGGAGGAGTTCACGAAGGCTGAAGAACCTAGAGGAATTATTTTCACAAAG  
ACTCGGCTAAGTGCCTTTGCTCTATTCCAGTGGATTAAGGATAACCCAAAATTTGAAGAAGT  
GGGAATTAAGGCCATTATCTTATCGGTGCTGGACATAACAGTGAAATTAAACCCATGACT  
CAGAATGAGCAAAGGGAAGTTATTGATAAATTCGAGGTGGAAATGTAAATTTACTTATTGC  
TACTACTGTAGCTGAGGAAGGCCTAGACATCAAAGAGTGTAACATCGTTATTAGCTATGGC  
CTCATCACCAATGAAATTGCAATGGTGCAGGCTCGTGGTCGAGCTCGAGCTGATGAGAGC  
ACCTATGCACTTGTGGCTTCAAGTGGCTCAGGAGCTGTTGAACGTGAAGATGTTAATATTTT  
CCGTGAGAAAATGATGTATAAGGCCATTCAGCGTGTCCAGAAGATGCCACAGGAAGAGTAT  
TTAAGAAGATTGATAATTTCCAGTGGCAAAGTATAGTAGAAAAACAAATGAAGGCAAAGAG  
AGATCAGTGCAAGCCATACAAGAAAAACCTTCACTAATAACATTCTTATGCAAAAATTGCC  
ACAAGCTGATATGTTCTGGAGAAGACATACAAGTTATTGAAAAGATGCATCATGTCAGTGTG  
AAAAAAGACTTCCAAAGTCTTTACCATACAAGAGAAAATAAGACACTGCAAGATAAACATGC  
CGATTACCAGACAAATGGAGAAATTATATGTAAAGATTGTGGACAAGCTTGGGGAAATATG  
ATGGTTCACCGAGGCCTTGACCTGCCTTGCTAAAGATTAGAAATTTTGTGGTTGTGTTTGA  
AGACAAGAAAACAACAAAGCAAATTTTTAAGAAATGGGGAGAACTGCCCATCATGTTCCCT  
AGTTTTGATTATGCAGCTCACTGTCTTCAAGTGATGAAGATTAA

>buceros\_rhinoceros-mda5

ATGGCCGAGGGGTCCCGGGACGCGCGCTTCTCTACATGATCTCCTGCTTCAGGCCGCG  
GCTGAAGCAGTTCATCCGGGTGCAGCCGGTGTCTGGACCGGCTTCCCTCGCTGMGCGCCS  
GGGGGAGGGAGGAGGKGCGGGSCGCCGCCtACAGCGGGGAGAGGCGGAAGGTGCGGA  
GGAGCTGCTGCGGGCCGTGGAGCGGGGTCCCCGCGGGTGC GGCTGGKTCCMCGAGKTC  
CTGCAGGCTCTGGRGCACGGCGGSTGCAGCCTGGCCGCCYGCTACGCGAACCCAGCCT  
CAGCCAGCTGCCCTCGCCGGCCGAAGAGGCTGACCACGACCTCTGCGTGCACTTGGTGA  
ACCTACTCTACAGCTCACTGGTGGATAGAATGCAGACGGTGCAGGTGGCCGAGAAGTGCC  
TGCAGATGGGCATCTTCCAGGACGAAGACCTGGATAGGATCCAGACCATTACTGATAATCG  
TGGGAACAGAGATGGTGCAAGGGAGCTATTGAGCAGAATAGTGCAGAAAAAAGATTGGTT  
CTCTCGTTTTCTGATGGCTCTGCGTGAAACCCAACATGGAGACCTTGCAGATGATTTAAGT  
GGAAATACAGGAGGAACAGAGAACAGACAAAACGGGATGAAGAACAGTATAACAATGAA  
ACAGAAGCTTCAAGCCAAGTATGTCTAGTGGAGGATTTGAAACAGCAAGAAAAA  
TGAATGATAGTTTCAGCAGTGAGAACAGTGTATTGGAAACATCTGTTGGAAAGAATTTTGTA  
GTTTCAGGAGATGGAAGTGTACAGTAACCTGAATGAAAACCTGGAACAGACCTATACAACCA  
GTGACTCAGATGAAGATGAAACGGAGAGCAGAGCTTACCTGAGCCAGATCTGATCCTAA  
GAGATTACCAAATGGAAGTTGCGAAGCCAGCACTGAATGGGGAGAATATTATAATATGTCT  
CCCTACAGGCAGTGGTAAAACCCGAGTGGCTGTTTACATTACCAAAGATCACTTGGATAAG  
AAGAAAAGAGCATCAGAGCCTGGAAGTTATAGTACTTGTTAATAAGGTACCGTTGGTAG  
AACAGCATTTACGAAAGGAGTTTAATCCATTCTGAAGCGCTGGTATCGGGTTATTGGTTTA  
AGTGGTGATACGCAACTAAAAATCTCATTTCTGAAGTTGTGAGAAGATACGATGTAATCAT  
CAGTACAGCACAGATCCTTGAGAATTCAGTGTTAAATGCTGCCGACGAAGATGAAGGTGTC

CACATATCAGATTTTTCTACTCATCATCATCGATGAGTGTCATCACACTCAGAAGGAAGGTGT  
CTACAACAATATAATGCGACGTTACCTAAAGGAAAAGATGAAGAACAAGAAGCTGGCAAAA  
GAAAACAAACCACTGATCCCACAGCCTCAGATTCTAGGACTTACAGCCTCACCTGGTGTAG  
GAGGTGCAACATGCCACTCAAAAGCTGAAGAACATATTCTGAAAATCTGTGCCAATCTTGA  
TGCGTGTAGAATCATGACTGTCGAAGAGCATGCCTCCCAGTTGAAGAGTCAGGTGAAGGA  
ACCGTATAAGAAGACTGTAATTGCAGATGACAAAAGAAGGGATCCATTTAGAGAGAGAATT  
ACTGAGATCATGACAGACATTCAAAACTATTGCCAGCTCCATCCAAAATCTGAGTTTGGAAC  
CCAGCCTTATGAACAGTGGGTGATTAGAGAAGAGAGAAGAGCTGCAATAGAAAAAAGCG  
CAAGGAACGTGTCTGTGCAGAACATTTAAAGAAATACAATGATGCTCTCCAGATAAATGACA  
CTATCCGAATGGTGGATGCATACAATCACCTAAATAACTTCTATAAAGAGGAGAAAAATAAA  
AAGACAGTAACGAGTGATGATGATGGTGATGAACCAGCAGTATCAAAACAGGATGAAACAG  
ATGAATTTCTAATAGGTTTTATTTTCATGCAAAAAAGAAACAGCTGAAAGAGTTGGCTACAAAG  
CCAGAATATGAAAATGAGAAGCTAATAAAGTTGCGAAACACTTTAATGGAGGAGTTCACGA  
AGACTGAGGAACCTAGAGGAATTATTTTCACAAAGACTCGGCAAAGTGCCTTTGCTCTATT  
CCAGTGGAATTAAGGATAACCCAAAATTTGAAGAAGTGGGAATTAAGGCCCATTTATCTTATC  
GGTGCTGGACATAACAGCGAAATGAAACCCATGACTCAGAATGAGCAAAGGGAAGTTATTG  
ATAAATTCGAAGTGGAATGTAAATTTACTTATTGCTACTACTGTTGCTGAGGAAGGCCTA  
GACATCAAAGAGTGTAACATTGTTATTTGCTATGGCCATGTCACAAATGAAATTGCGATGGT  
ACAGGCTCGTGGACGAGCTCGAGCTGATGAGAGCACCTATGCGCTTGTGGCTTCAATTAG  
CTCAGGAGCTATTGAACGTGAAGATGTTAATGTCTACCGTGAGAAAATGATGTATAAGGCC  
ATTCAGCGTGTCCAGAAGATGCCAAAGGAAGAGTATTTAAATAAGCTTGAGAATTTCCAGTT  
GCAAAGTATAGTGGA AAAACAAATGAAGGCAAAGAGAGACCAAGTGCAAGACATACAAGAAA  
AATCCTTCACTAATAACATTCCATGCAAAAATTGCCACAAGCTGATATGTTCTGGAGAAGA  
CATACAAGTTATTGAAAACATGCATCATGTCAAGTGTA AAAAAGATTTCCAAAGTCTTTATCA  
TACAAGAGAAAAATAAGACACTGCAAAATAAGCATGCCGATTACCAGACAAATGGGGAAATT  
ATATGTAAAGACTGTGGACAAGCTTGGGGAAATATGATGGTTCACCGAGGTCTTGACCTGC  
CTTGTCTCAAGATTAGAAATTTTGTGGTTGTCTTTGAAGACAAGAAAAAACAAGCAAATTT  
TTAAGAAATGGGCAGAACTGAGTGTCAGGTTCCCTAGTTTTGATTACGCAGCTCATTATCCT  
TCAAGTGATGAAGATTAA

>burhinus\_oedicnemus-mda5

ATGGCAGAGGAGTCCGGAGACGAGCGCTTCCTCTACCTGATCTCCTGCTTCAGGCCGCGG  
CTGAAGCAGTTCATCCGAGTGACGCCGGTGCTGGACTTGCTTCCCTCTCTGAGCGCTGAG  
GAGCGGGAGAGGGTGCGGGCGGCCGCCCGGCAGCGGGGCGAGGTGGAGGGCGCAGAG  
GAGCTGCTGCGGGCCGTGGAGCGGGGACCCCGCGGGTGCGGCTGGTTCCACGAGTTCC  
TGCAGGCGCTGGAGAACGGCGGCTGCAGCCTGGCTGCCTGCTACGTGAACCCACGCCTC  
AGCCAGCTGCCCTCGCCGGCCGAGGAGGCCGACCATGACCTCTGCGTGCACTTGGTGCA  
GCTGCTCCACAGCACACTGGTGGACAAAATGCAGACCATGCAGGTGGCTGAGAAATGCCT  
GCAGATGGGCATCTTCCAGGACGACGACCTGGATCGGATCCACACTGTTACTGACAATCG  
TGGGAACAGAGATGGTGCAAGGGAGCTATTGAGCAGAATAGTGCAAGAGAAAGATTGGTT  
CTCTCCTTTTTTGATTGCTTTGCGTGAAACCCAAACATGGAGACCTTGACAGATGATTTAAGTG  
GAAATACAGGAGGAACAGAGAATAGAGAAAATGGGATTAAGAACAGTACAAACGAAGAAAC  
AGAAATTACAAGCCAACCAGGATATGCTGTAGTAGAGGATTTGAAACAGCAAGAAAATGCG  
AATGATAGTTTCAGCAGCGAGAACAGTGCAATTGGAACTTCTGTTGGAAAGAATTCTGTAG  
TTTCAGAGTCAGATGTCTCCATAGGAGATGTAAGTGTTGGTAACTTGAATGAAAACCTGGG

ACAGAGCTGCACAACCAGTGATTCAGATGAAGATGAAGTGCAGAGCAGAGCTTCACCTGA  
GCCAGATCTGATCCTGAGAGATTACCAGATGGAAGTTGCAAAGCCAGCACTGAATGGGGA  
GAATATCATAATATGTCTGCCTACAGGCAGTGGTAAAACCAGAGTGGCTGTTTACATTACCA  
AAGATCACTTGGATAAGAAGAAAAGAGCATCAGAGCCTGGAAAAGTTATAGTACTTGTTAAT  
AAGGTACCGTTAGTAGAACAGCATTACGAAAGGAGTTTAAATCCATTCCTGAAGCGTTGGT  
ATCAGGTTATTGGTTTAAAGTGGTGATTCTCGGCTGAAAATCTCATTTCTGAAGTTGTCAGA  
AGAAATGACGTCATCATCAGCACAGCACAGATCCTTGAGAATTCAGTGTTAAATGCAGCCG  
AAGAAGATGAAGAAGGTGTCCACTTATCAGATTTTTCACTCATCATTATCGATGAGTGTCAT  
CACACTCAAAGGAAGGTGTCTACAACAATATAATGCGACGTTACTTAAAAGAAAAGAGGA  
AGAACAGGAAGCTGGCAAAGAAAACAAACCACTGATCCACAGCCTCAGATTCTGGGAC  
TTACAGCCTCACCTGGTGTAGGAGGTGCAACATCCAACCTCAAAGCTGAAGAACATATTCT  
GAAAATCTGTGCCAATCTTGATGCACGTAGAATCATGACTGTTGAAGAGCATGCCTCCCAA  
TTAAAGAATCAAGTGAAGGAACCGTATAAGAAGACTGTGATTGCAGATGACAAAAGAAAGG  
ATCCATTTAGAGAGAGAATTACTGAGATCATGAGAGACATTCAGAACTATTGCCAGCTCCAT  
CCAAAATCTGAGTTTGGAAGTCAAGCCCTACGAACAGTGGGTGATTAGAGAAGAGAAAAAG  
CTGCAAAGAAAGAAAAACGCAAGCAACGTGTCTGTGCAGAACACTTGAAAAATACAATGA  
TGCTCTCCAGATAAATGACACTATCCGAATGGTGGATGCGTACAATCACCTAAATAACTTTT  
ATAAGGAGGAGAAAAAGTAAGAAGACAGTAAGGAGTGATGATGATGATGATGAACCAG  
CAGTATCAAACAGGATGAAACAGATGAATTTCTAGTAGGTTTATTTTCATGCAAAAAAGAAA  
CAGCTGAAAGAGTTGGCTAGAAAGCCAGAATATGAAAACGAGAAGCTAATACAGTTGCGAA  
ACACTTTAATGGAGGAGTTCACGAAGACTGAAGAACCTAGAGGAATTATTTTCACAAAGACT  
CGCCTAAGTGCTTTTGTCTATTCCAGTGGATTAAGGATAACCCAAAATTTGAAGAAGTGG  
GAATTAAGGCCATTATCTTATTGGTGCTGGACATAACAGTGAAATTAAACCCATGACTCAG  
AATGAGCAAAGGGAAGTCATTGATAAATCCGAGGTGGAAGTGTAATTTACTTATTGCTAC  
TACTGTAGCGGAGGAAGGCCTAGACATCAAAGAGTGTAACATCGTTATTGCTATGGCCTT  
GTCACCAATGAAATTGCTATGGTGCAGGCTCGTGGTGCAGCTCGAGCTGATGAGAGCACC  
TATGCACTTGTGGCTTCGAGTGTCTCAGGAGCTGTTGAACGTGAAGATGTTAATATTTTCC  
GTGAGAAAATGATGTATAAGGCCATTACAGCGTGCCAGAACATGCCACAGGAAGAGTATT  
AAATAAGATTGAGAATTTGCAGTTGCAAAGTATAGTGGAAAAACAAATGAAGGCCAAAGAGA  
GATCAGCACAAAGACATACAAGAAAAATCCTTCACTGCTAACATTCCTATGCAAAAATTGCCA  
CAAGCTGGTATGTTCTGGAGAAGACATACAAGTTATTGAAAACATGCATCATGTCAGTGTCA  
AAAAAGACTTCCAAAGTCTTTACAATACAAGAGAAAATAAGACACTGCAAGATAAGCATGCC  
GATTACCAGACAAATGGGGAAATTATATGTAAAGATTGTGGACAAGCTTGGGGAAATATGA  
TGGTTACCGAGGTCTTGACCTGCCTTGTCTAAAGATTAGAAATTTTGTGGTTGTGTTTGAA  
GACAAGAAAACAACAAAGCACATTTTTTAAGAAATGGGGAGAACTGCCCGTCAGGTTCCCTA  
GTTTTGATTATGCAGCTCATTGTCCTTCAAGTGATGAAGATTAA

>butastur\_indicus-mds5

ATGGCAGCGGAGACCCGAGACGAGCGCTTCCTCTACATGATCTCCTGCTTCAGGCCGCGG  
CTGAAGCAGGTCATCCGCGTGACGCCGGTGCTGGACCGGCTTCCTCGCTGAGCGCGGA  
GGAGAGGGGAGAAGGTGCGGGGCGGCCGCCCTGCAGCGGGGCGAGGTGGAGGGGGCGGA  
GGAGCTGCTGCGGGCCGTGGAGCGGGGGCCCCGCGGGTGCGGCTGTTCCACGAGTTC  
CTGCAGGCGCTGGAGCACGGCGGCTGCAGCCTGGCCGCCTGCTACGTGAACCCAGCCT  
CAGCCAGCTGCCCTCGCCGGCCGAGGAGGCCGACCACGACCTCTGCGTGCATTGGTGC  
AGCTGCTCCACGGCACGCTGGTGGATAAAATGCAGACCGTGAGGTGGCCGAGAAGTGC

TTGCAGATGGGCATCTTCCAGGATGAGGACCTGGATCGGATCTACACTGTTACTGACAATC  
GTGGGAACAGAGATGGTGCAAGGGAGCTACTGAGCAGAATAGTGCATAAGAAAGATTGGT  
TCTCTCCTTTTTTGGATTGCTCTGCGTGAAACCCAACATGGAGGCCTTGCAGATGATTTAAGC  
GGAAATACAGGAGGAACAGAGAATAGACAAAATGGGATGAAGAACAGTACAAATGAAGAAA  
CAGAAGTTACAAGCCAACCAGGATATGCCGTAGTGGAGGATTTGAAACAGCAAGAAAACGT  
GAATGAAAGTTTTACGACAGTGAGAACAGTGTATTGGAAGCATGTATTGGAACGAATTCTGTA  
GTTTCAGAGTCAGATGTCTCCATAGGAGATAGAAGTGTGAGTAACATGAATGAAAACCTAG  
GACAGAGCTGCACAACCAGTGATTCAGATGAAGATGAAATGGAGAGCAGAGCTTCACCTG  
AGCCAGATCTGATCCTGAGAGATTACCAGATGGAAGTTGCAAAGCCAGCACTGAATGGGG  
AGAATATTATAATATGTCTCCCTACAGGCAGTGGTAAAACCAGAGTAGCTGTTTACATTACC  
AAAGATCATTTGGATAAGAAGAAAAGAGCATCAGAGCCCGGAAAAGTTATAGTACTTGTTAA  
TAAGGTACCATTGGTAGAGCAGCATTTACGAAAGGAGTTTAATCCATTCTGAAGCGTTGG  
TATCAGGTTATTGGTTTAAAGTGGTGATTCTCAGCTGAAAATCTCATTTCTGAAGTTGTCAG  
AAGAAATGATGTCATCATCAGTACAGCGCAGATCCTTGAGAATTCATTGTTAAATGCAGCCA  
AAGAAGATGAAGAAGGTGTCCAGTTATCAGATTTTTCTACTCATCATTATCGATGAGTGTCAT  
CACACTCAAAGGAAGGTGTCTACAACAATATAATGCGACGTTACTTAAAAGAAAAGATGAA  
GAACAGGAAGCTGGCAAAAAGAAAACAAACCACTGATCCCACAGCCTCAGATTCTGGGACTT  
ACAGCCTCACCTGGTGTAGGAGGTGCAACATCCTACTCAAAGCTGAAGAACATATTCTGA  
AAATCTGTGCCAATCTTGATGCATGTAGAATCATGACTGTTGAAGAGCATGCCTCCCAATTG  
AAGAATCAGGTGAAGGAACCATATAAGAAGACTGTGATTGCAGATGACAAAAGAAGGGATC  
CATTTAGAGAGAGAATTACTGACATCATGACAGACATTCAAACCTATTGCCAGCTCCATCCA  
AAATCTGAGTTTGGAACTCAGCCATATGAACAGTGGGTGATTAGAGAAGAGAGAAGAGCTG  
CAAAAGAAGAAAAACGCAAGGAACGTGTGTGTGCAGAACACTTGAAGAAATACAATGATGC  
TCTCCAGATAAATGACACCATCCGAATGGTAGATGCGTACAATCACCTAAATAACTTTTTATA  
AGGAGGAGAAAAGTAAGAAGACAGTAAGGA<sub>g</sub>TGATGATGATGATGATGAACCAGCAGTATC  
AAAACAGGATGAAACAGATGAATTTCTAATAGCTTTGTTTCATGCAAAAAAGAAACAGCTGA  
AAGAGTTGGCTAGAAAGCCAGAATATGAAAATGAGAAGCTAATACAGTTGCGAAACACTTT  
AATGGAGGAGTTCACGAAGACTGAAGAACCTAGAGGAATCATTTTCACAAAGACTCGGCTA  
AGTGCCTTTGCTTTATTCCAGTGGATTAAGGATAACCCAAAATTTGAAGAAGTGGGAATTAA  
GGCCCATTATCTTATTGGTGCTGGACATAACAGTGAAATTAACCCCATGACTCAGAATGAG  
CAAAGGGAAGTTATTGATAAATTCCGAAGTGGAAATGTAAATTTACTTATTGCTACTACTGT  
AGCTGAGGAAGGCCTAGACATCAAAGAATGTAAACATCGTTATTGCTATGGCCTCGTCACC  
AATGAAATTGCTATGGTGCAGGCTCGTGGTCGAGCTCGAGCTGATGAGAGCACCTATGCA  
CTTGTGGCTTCGAGTGGCTCAGGAGCTGTTGAACGCGAAGATGTTAATATTTCCGTGAGA  
AAATGATGTATAAGGCCATTACGCGTGTCCAAAAGATGCCGCAGGAAGAGTATTTAAATAA  
GATTCAGAATTTCCAGTTGCAAAGTATAGTGGA AAAACAAATGAAGGCAAAGAGAGATCAG  
CGCAAGACATACAACAAAAATCCTTCACTAATAACATTCTTATGCAAAAATTGCCACAAGCT  
GGTATGTTCTGGAGAAGACATACAGGTTATTGAAAACATGCATCATGTCAGTGTGAAAAAA  
GAYTTCAAAGCCTTTACCATACAAGAGAAAATAAGACACTGCAAGATAAGCATGCCGATTA  
CCAGATAAATGGGGAAATTATATGTAAAGATTGTGGACAAGCTTGGGGAAATATGATGGTT  
CACCGAGGTCTTGACCTGCCTTGTCTAAAGATTAGAAATTTTGTGGTTGTGTTTGAAGACAA  
GAAAACAACAAAGCAAATGTTTAAGAAATGGGGGAGAACTGCCTGTCAGGTTCCCTAATTTT  
GATTATGCAGCTCATTGTCTTCAAGTGATGAAGATTAA

>cacatua\_leadbeateri-mds5

[illegible]

GGAAGACATACGAGTTATTGAAAACATGCATCATATCAGTGTGAAAAGAGATTTCCAAAGTC  
TTTACTATACAAGAGAAAAATAAGACGCTGCAAGATAAGAATGCTGACTACCAGACAAATGG  
AGAAGTTATATGTAAAGATTGTGGACAAGCTTGGGGAAATATGATGGTTCACCGAGGTCTT  
GACTTGCCTTGTCTAAAGATTATAAATTTTGTGATTGTGTTTGAAGACAAGAAGACAACAAA  
AGAAATTTTTAAGAAATGGAGAGAGCTGCCCCGTCGAGTTCCTAGTTTTGATTATGCAGCT  
CATTGTCCTTCGAGTGATGAGGATTAA

>cairina\_moschata-md5

ATGTCGACGGAGTGCCGAGACGAGTGCTTCCTCTACATGATCTCCTGCTTCAGGCCGCGG  
CTGAAGCAATACATCCAGGTGCTGCCGGTGCTGGACCGGCTGCCCTCGCTGAGCCTGGA  
GGAGAAGGAGAAGGTGCGGGTGGCGGCGGAGCAGAGGGGCGCTGTGGAGGGGGCTGA  
GGAGCTGCTGCGCGCCGTGGAGCGCGGCCCCCGCGGCCAAGGTTGGTTTCCTGAGTTTCG  
TGCAGGCGCTGGAGAACAGCGGCTGCGACCTGGCTGCCCGCTACGTGAACCCCAGCCAG  
CTGCCCTCGCCACCGAGGAGGCTGACCACGACCTCTGTGTGCAATTGGTGCAGCTGCTC  
CACGCCACCCTGGTGGATAAGATGCAGGCCAGGCAGGTGGCCGAGATGTGCCTGCAGAT  
GAACATTTTCCAGGAGGAGGACCTGGAACGGATCAGTGCTGTTACTGAAACTCGTGGGAA  
CAGAGATGGTGCAAGAGAGCTATTGAGTAGAATAGTGCAAAAAAGGATTGGTTTTCTCCT  
TTCTTGGTTGCTCTGCGTCAAAACACAACATGAAGACCTTGCAAGATGATTTAAGTGGAATAC  
AGGAGGAAAAAGAGAATAAAGGAAACGGGGTGAAGAACAGTGCAAACAAAGAAACAGAAGC  
TGCAAGCCAACCAGGACATTCTGTAGTGAAGGATTTGAAACAGCAAGAAAATCTGAATAGT  
GGTTCTGTCAGTGAAAATGGTGTATTGGAAACATCTGTTGAAAAGAATTCTGTAGTTTTGGA  
ATTGGATGTGCTACAGAAGATAGAAGTGTCAGTAACATGGATGAAAACCTGGGACAGAGC  
AGTACAACCAGTAATTCAGATGAAGATGAAATGGAGAGCAGAGCTTCACCTGAACCAGATC  
TGATCCTGAGAGACTACCAGATGGAAGTTGCAAAGCCAGCACTGAATGGGGAGAATATTAT  
AATATGCCTCCCTACAGGCAGTGGTAAAACCAGAGTGGCTGTTTACATTACCAAAGATCAT  
TTGGATAAGAAAAAAGAGCATCAGAACCTGGAAAAGTTATAGTACTTGTTAATAAGGTACC  
GTTAGTGGAACAGCATTACGAAAAGAGTTTAATCCATTCTGAAACGTTGGTATCAGGTTA  
TTGGTTTAAGTGGTGATTCTCAGCTGAAAATCTCATTTCCTGAAGTTGTCAGAAGATATGAT  
GTAATCATCAGTACAGCACAGATTCTTGAGAATTCAGTGTAAAGTGCAACTGAAGAAGATGA  
AGAAGGTGTCCACTTATCAGATTTTTCACTCATCATTATTGATGAGTGTGCATCACACTCAA  
AGGAAGGCGTCTACAACAATATAATGCGACGTTACATAAAAGAAAAGATGAAGAACAGAAA  
ACTGGCTAAAGAAAACAAACCATTGGTTCCACAGCCTCAGATTCTGGGACTTACAGCCTCA  
CCTGGAGTAGGAGGTGCAAATTCAACTCAAAGCTGAAGAACATATTCTAAAAATCTGTG  
CCAATCTCGATGCACGTAGAATCATGACTGTTGAAGAACATGCCTCCCACTGAAAAATCA  
GGTGAAGGAGCCATTAAAGAAGACCGTGATTGCAGATGACAAAAGAAAGGATCCATTGAGA  
GAAAGAATTATTGAGATCATGACAGATATTCAAACCTATTGCAAACCTATCCAAAATCTGA  
GTTTGGATCTCAGCCATATGAACAGTGGGTGATTAGAGAAGAGAAAAAAGCTGCAAAGGAA  
GAAAAACGCAAGGAACGTGTCTGTGCAGAACACTTGAAGAAATATAATGATGCTCTGCAAA  
TTAATGACACTATCCGAATGGTTCGATGCATACAATCACCTAAATAACTTTTATAAGGAGGAA  
AAAAGCAAGAAAACAATAGGAAGTGATGATGATGAACCAGCAGTAACAAAACAGGATGAAA  
CAGATGAATTTCTAATAGATTTATTTTCATGCAAAAAAGAAACAGCTAAAAGAGTTGGCTAGA  
AAGCCAGAATATGAAAATGAGAACTGATAAAGTTGCGAAACACTTTAATGGAGGAGTTCA  
CAAAGACTAAAGAACCTAGAGGAATTATTTTCACAAAGACTCGGCAAAGTGCCCTTTCCTTA  
TTCCAGTGATTATGGATAACCCAAAATTTGAAGAAGTGGGGATTAAGGCTCATTATCTTAT  
TGGTGCTGGACACAACAGTGAAACTAAACCCATGACTCAGAATGAGCAAAGGGAAGTCATT

GATAAATTCCGAGGTGGAAGTGTAATTTACTTATTGCTACTACTGTAGCTGAAGAAGGTCT  
GGACATCAAAGAGTGTAACATTGTTATTCGTTATGGCCTTGTCACCAATGAAATTGCTATGT  
TGCAGGCCCCGTGGTCGAGCTCGAGCTGATGAGAGCACCTATGCACTTGTGGCTTCGAGTG  
GCTCAGGAGCTGTTGAACGTGAAGACGTAAATATTTACCGTGAGAAAATGATGTATAAGGC  
CATTGAGCGTGTCCAGAGGATGCCGCAGGACGAATATTTAAATAAGATTGAGAGCTTCCAG  
TTGCAGAGTATAATGGAAAAACAAATGAAGGCCAAAAGAGATCAGCGTAAAACATATAAGA  
AAAACCCTTCACTAATAACATTCTATGCAAGAATTGCCACAAGCTGATATGTTTCAGGAGAA  
GATATACAAGTTATTGAAAACATGCATCATGTCAGCGTGAAAAAAGATTTCCAACATCTTTA  
CCATACAAGAGAAAAATAAGACACTGCAAGATAAACATGCTGATTACCAGACAAATGTGGAA  
ATTATATGTAAAGATTGTGGACAAGCTTGGGGAAATATGATGGTTCACCGAGGTCTTGACC  
TGCCTTGTCTAAAGATCAGAAATTTTGTGGTTGTTTTGAAGACAAGAAAGGAACAAAGGAA  
ATTTTTAAGAAATGGGTAGAACTGCCCATCAGGTTCCCCAGTTTTGACTATGCAGCTCATTG  
TCCTTCAAGTGATGAAGACTGA

>calidris\_pugnax-md5

ATGGCTGAGGAGTGCCGAGACGAGCGGTTCTCTACATGATCTCCTGCTTCAGGCCGCGG  
CTGAAGCAGGTCATCCGTGTGCAGCCGGTGCTGGACCTGCTCCCCTCGCTGAGCGCGGA  
GGAGAGGGGAGAAGGTGCGGGGCGGCCGCCGAGCGGCGCGGTGAGGTGGAGGGGGCGGA  
GGAGCTGCTGCGGGGCCGTGGAGCGGGGTCCCCGCGGCTGCGGATGGTTCCACGAGTTC  
CTGCAGGCGCTGGAGAACGGCGGCTGCAGCCTGGCAGCCTGCTACCTCAACCCAGCCT  
CAGCCTCCTGCCCTCGCCCGCCGAGGAGGCCGACCACGACCTCTGCGTGCACCTAGTGC  
AGCTGCTCCACGGCACACTGGTGGATAAAATGCTGCCCAGGCCGGTGGCTGAGAAGTGC  
CTAGAGATGGGCATTTTCCAGGAGGACGACCTGGATCGGATTCATACTGTTACTGACAATC  
GTGGGAACAGAGATGGTGCAAGGGAAGTGTGAGCAGAATAGTGCAGAAGAAAGATTGGT  
TCTCTCCTTTTTTGGTTGCTTTCGCTGAAACCGAACATGGAACCTTGAGATGATTTAAAT  
GGAATTACAGGAGGAACAGAGAATAGACAAAATGGGATGAACAATACAAATGAAGAAACAG  
AAGTTACAAGCCAACCAGGACATGCCGCAGTGGAGGATTTGAAACAGCAAGAAAATGTGA  
ATGATGGTTTCAGCAGTGAGAACACTGCATTGGAACATCTATTGGAACAATTCTGTAGTT  
CCAGAGTCAGATGTCTCCATAGGAGATGCAAGTGCCAGTAACTTGAATGAAAACCTGGGAC  
AGAGCTGTACAACCAGTGATTCAGATGAAGATGAAGCGGAGAGCAGAGTTTCACCTGAGC  
CAGAACTGACCCTGAGAGATTACCAGATGGAAGTTGCAAAGCCAGCCCTGAATGGGGAGA  
ATATCATAATATGTCTGCCTACAGGCAGTGGTAAAACCAGAGTGGCTGTTTACATTACCAAA  
GATCACTTGGATAAGAAGAGAAGAGCATCAGAGCCTGGAAAAGTTATAGTACTTGTTAATA  
AGGTACCGTTGGTAGAACAGCATTTACGAAAGGAGTTTAGTCCATTCTGAAGCGTTGGTA  
TCGGGTATTGGTTTAAAGTGGTGATTCTCAGCTGAAAATCTCATTTCCTGAAGTTGTCAGAA  
GAAATGATGTCATCATCAGTACAGCACAGATCCTTGAGAATTCAGTGTAAATTCAGGCGAA  
GATGATGAAGAAGGTGTCCACTTATCAGATTTTTCACTCATCATTATTGATGAGTGTCA  
CACGCAAAAGGAAGCTGTCTACAACAATATAATGCGACATTACTTGAAAGAAAAGAGGAAG  
AACAGGAACTGGCAAAAGAAAACAACCACTGATCCCACAGCCTCAGATCCTGGGACTTA  
CAGCCTCACCTGGTGTAGGAGGTGCAAAATCTAACACAAAAGCTGAAGAACATATTCTGAA  
AATCTGTGCCAATCTTGACGCGCATAGAATCATGACTGTAAAGAACATGCTTCCCAGTTGA  
AGAATCAGGTGAAAGAACCATATAAGAAGACTGTGATTGCAGATGACAACAGAAGGGATCC  
ATTTAGAGAGAGAATTACTGAGATCATGAGAGAGATTGAGAACTATTGCCAGCTCCATCCA  
AAATCTGAGTTTGGAACTCAGCCATATGAACAGTGGGTGATTAGAGAAGAGAAAAAGCTG  
CAAAAGAAGAAAAACGCAAGGAGCGTGTCTGTGCAGAACACTTGAAGAAATACAATGACGC



TCTCCAGATAAATGACACCATCCGAATGGTGGATGCATACAATCACCTAAATAATTTTTATA  
AGGAGGAGAAAAGTAAGAAGACAGTAAGGAGTGATGATGATGATGATGATGAACCAGCAG  
TATCAAAACAGGATGAAACAGATGAATTTCTAATAGGTTTATTTTCATGCAAAAAAGAAACAG  
CTGAAAGAGTTGGCTAAAAAGCCAGAATATGAAAACGAGAAGCTAATACAGTTGCGAAACA  
CTTTAATGGAGGAGTTCACAAAGACGGAAGAACCAAGAGGAATTATCTTCACAAAGACTCG  
GCTAAGTGCCTTTGCTCTTTTCCAGTGGATTAAGGATAACCCAAAATTTGAAGAAGTGGGA  
ATTAAGGCCCATTAACCTTATTGGTGCTGGACATAACAGTGAAAGTAAACCCATGACTCAGA  
ATGAGCAGCGGGAAGTCATTGATAAGTTCCGAGGTGGAAGTGTAATTTACTTATTGCTAC  
TACTGTAGCCGAGGAAGGCCTAGACATCAAAGAGTGTAACATCGTTATTTCGCTATGGCCTC  
GTCACCAATGAAATTGCTATGCTGCAGGCTCGTGGTTCGAGCTCGATCTGATGAGAGCACC  
TACGCGCTTGTTGGCTTCAAGTGCCTCAGGAGCTGTTGAACGTGAAGATGTTAATATTTTCC  
GTGAGAAAATGATGTATAAGGCCATTCAGCGTGTCCAGGACATGCCGCAGAAAGACTATTT  
AAATAAGATTGAGAATTTGCAGTTGCAAAGTATAGTGGAACAAATGAAGGCCAAAGAGA  
GATCAGCACAAGACATACAAGAAAAATCCTTCACTAGTAACATTCCTATGCAAAAATTGCCA  
CAAGCTGGTATGTTCTGGAGAAGACATACAGGTTATTGAAAACATGCATCATGTCAGTGTG  
AAAAAAGACTTCCAAAGTCTTTACCAAACAATAGAAAATAAGACACTGCAAGACAAGCATGC  
CGATTACCAGACAAATGGGGAAATTATATGTAAACAATGTGGACAAGCTTGGGGAAATATG  
ATGGTTCACCGAGGTCTTGACCTGCCTTGCTCTAAAGATTAGAAATTTTGTGGTTGTGTTTGA  
AGACAAGAAAACAACAAAGCACATTTTTAAGAAATGGGGAGAACTGCCCATCAAGTTCCT  
AGTCTTGATTATGCAGCTCATTGTCCTTCGAGCGATGAAGATTAA

>callipepla\_squamata-mda5

ATGTCCGAGGAGTGCCGAGACGAGCGCTTCCTCTACATGATCTCCTGTTTCAGGCAGCGG  
CTGAAGCGCTGCATCCGAGTGACGCCGGTGCTGGACTGGCTGCCCTCGCTGAGCGCGGA  
GGAGAAGGAGAGGGTGCGTGCTGCGGCGCAGCATCGCGGCGAGGTGGAGGGGGCCGA  
GGAGCTGCTGCGCGCTGTGGAGCGCGGCCCGCGGCCCGGCTGGTTCCCCGAGTTC  
CTGCTGGCGCTGAAGAAAGGCGGCTGCGACCTGGCCGCTTGCTACGTGAACCCTAGCCA  
GCTGCCCTCGCCCCGGGAGGAGGCCGACCACGATCTGTGCGTGACCTGGTGCAGCTGT  
TGCACGGCACGCTGGTGGATAACATGCAGACCAGGCAGGTGGCCGAGAAGTGCCTGCAG  
CTGGGCATCTTCCAGGAGGAGGACATGGTTCGGATTGATGCTGTTACTGACAGTCATGGG  
AACAGAGAAGGTGCAAGGGAGCTGTTGAGTAGGATAGTGCAAGAAGAAGGATTGGTTCTCT  
CAGTTTCTGGTTGCTCTGCGTGAAACTCAACATGAAAGCCTTGCAAGATGATTTAAGTGGA  
ATACAGGAGGAATAGAGAATAAAGAAGATGACTTGAAGGACAGAACAAGCAAAGAAACAGA  
AGCTGCAAGCCAACCAGGACATGCTGCAAAGGAGGATTTGAAGCAGCAAGAAAATTTGGA  
TGATAGCTTTGTCAGGGAGAGCAGTGATTGGAAACATCTGTTGGAAAGAACTCTGTAGTT  
TCAGAATCAGTTATCGCTGTAGAAGATACAAGTGTCAGTAACTTGAATGAAAGCCTGGGAC  
ACAGCAGCACAAACCAGTGATTCAGGTGAAGATGAAGCAGAGAGCAGAGCTTCACCTGAGC  
CAGATCTCACCTGAGAGATTATCAGATGGAAGTTGCAGAACCAGCGCTGAATGGGGAGA  
ATATTATAATATGTCTCCCTACAGGCAGTGGCAAACCCAGAGTGGCTGTTTACATTACCAAA  
GATCACTTGGATAAAAAAGAAAATAGCATCAGAGTCGGGAAAAGTTATAGTACTTGTTAATAA  
GGTACCGTTAGTGGAACAGCATTTACGAAGGGAGTTTAATCCATTCCCTGAAACGCTGGTAC  
CGGGTTATTGGTTTAAAGTGGTGATTCTGAGCTGAAAATTTCAATTCCTGAAGTTGTCAGAAG  
AAATGATGTCATCATCTGTACTGCACAGATCCTGGAGAATTCAGTGTAAATGCAACTGAAG  
ACGATGAAGGTGTCTACTTGTGAGATTTTTCACTCATGATTATTGATGAATGCCATCACACT  
CAAAAGGAAGGTGTTTACAACAACATAATGCGACGTTACTTGAAAGACAAGATCAAGAACA

GAAAGCTGGCAAAGAAAACAAACCTTTGATCCCGCAGCCTCAGATTCTGGGACTTACAGC  
CTCACCTGGAGTTGGTGGTGCAAGAACCTACTCAAAGCTGAAGAACATATTCTGAAGATT  
TGTGCCAATCTTGATGCATGCAAAATCATGACTGTTATAAAGCATGCCTCCCAGCTGAAGG  
ATCTGGTGAAGGAGCCATTTAAGAAGACTGTGATTGCAGATGACAAAAGAAAGGATCCGTT  
TAGAGAAAGAATTATTGAGATCATGAAAGAGATTGAAAAATATTGCCAGCTCTATCCAAAAT  
CTGAGTTTGGCTCTCAACCATATGAGCAGTGGGTGATTTCGGGAAGAGAGGAAAGCTGCAA  
AAGAAGAAAAACGCAAGGAACGCGTCTGTGCAGAACACTTGAAGAAATATAATGATGCACT  
GCAAATTAATGATACCATCCGTATGGTTGATGCATACAATCACCTAAATAACTTTTATAAGG  
AGCTGAAAAGGAAGAAGACAGTAGGGAGTGATGACGATGAAGAACCAATAGTATCAAAACA  
GGATGAAACAGATGAATTTCTATTAGGTTTATTTTCATGCAAAAAAGAAACAGCTGAAAGAGT  
TGGCTAGAAAGCCAGAATATGACAAATGAGAAGCTAATGAAGCTGCGAAACACTTTAATGGA  
AGAGTTCACAAAGACTGAAGAATCTAGAGGAATTATTTTCACAAAGACTCGGCCAAAGTGCC  
TTAGCTCTATACCACTGGATTATGGATAACCCAAAATTTGAAGAAGTGGGAATCAAAGCTCA  
TTATCTTATTGGCGCTGGACACAATAGTGAAACTAAACCTATGACTCAGAATGAGCAAAGG  
GAAGTCATTGATAAGTTCCGAGTTGGAAGTATAAATTTACTTATTGCTACTACTGTAGCTGA  
GGAAGGCCTAGACATTAAGAGTGTAACATTGTTATTCGCTATGGTCTGGTCACCAATGAA  
ATTGCTATGGTGCAGGCTCGTGGTAGAGCTCGAGCTGATGAAAGCACTTATGCACTTGTG  
GCTTCGTGTGGCTCAGGAGCTGTGGAGCGCGAAGATGTGAATGTTTTCCGTGAAAATATG  
ATGTATAAGGCCATTCAACGTGTCCAGAGGATGCCACCAGAAGAATATTTAAATAAGATTCA  
GGACTTCCAGTTGCAAAGTGTAAGTGGAAAACTAATGAAGGCAAAGAGAGATCAACATAAA  
ACATATAAGAAGAACCCTTCACTAATAACATTCCTATGTAAGAATTGTCACAAGCTGATATG  
TTCTGGAGAGGACATACAAGTAATTGAAAATATGCATCATGTCAAGTGTAAAAAAGATTTCC  
AACATCTTTACCATAAAAGAGAAAATAGGACACTGCAAGATAAGCATGATGATCACCAGACA  
AATGTGGAAATTATATGTAAAGATTGTGGACAAGCTTGGGGAAATATGATGGTTTTATCGAG  
GTCTTGATCTGCCTTGTCTAAAAATTAGAAATTTCTGTTGCTTTTGAAGACAAGAAAACA  
AAAAAGGATATTGTCAAGAAATGGGGAGAACTGCCCGTCAGGTTTCCTGACTTTAATTATG  
CAGCTCATTGTCCTTCAAGTGATGAAGATTAA

>calonectris\_borealis-mda5

ATGGCAGAGGAGTCCCGAGACGAGCGCTTCCGCTACATGATCTCCTGCTTCAGGCCGCG  
GCTGAAGCAGTTCATCCGGGTGCAGCCGGTGCTGGACCGGCTTCCCTCGCTGAGCGCAG  
AGGACAGGGAGAGGGTGCGGGCGGCCGCCCTGCTGCGGGGCGAGGTGGAGGGAGCGG  
AGGAGCTGCTGCGGGCCGTGGAGCGGGGGCCCCGCGGGTGCGGCTGGTTCCACGAATT  
CCTGCAGGCGCTGGAGCACGGCGGCTGCAGCCTGGCTACCTGCTACGTGAACCCCAGCC  
TCAGCCAGCTGCCCTCGCCGGCCGAGGAGGCCGACCACGACCTCTGTGTGCACTTGGTG  
CAGCTGCTCCACAGCACACTGGTGGATAAAATGCGGACCATGCAGGTGGCCGAGAAGTGC  
CTGCAGATGGGCATCTTCCAGGACGAGGACCTGGATCGGATCCACACTGTTACTGACAAT  
CGTGGGAACAGAGATGGTGCAAGGGAGCTATTGAGCAGAATAGTGCAGAAGAAAGATTGG  
TTCTCTCATTTTTTTGATTGCTCTGCGTGAAACCCAACATGGAGGCCTTGCAGATGATTTAAG  
CGGAAATACAGGCGGAACAGAGAATAGACAAAATGGGATGAAGAACAGTACAAACGAAGA  
AACAGAAGTTACAAGCCAGCCAGGATATGCAGTAGTGGAGGGTTTGAACAGCAAGAAAAT  
ATGAATGATAGTTTTCAGCAGTGAGAACAGTGTATTGGAAGCATCTATTGGAAGAATTCTGT  
AGTTTCAGAATTAGATGTCTCCATAGAAGATGGAAGAGTCAGTAACTTGAATGAAACCTG  
GGACAGAGCTGCACAACCAAGTGATTCAGATGAAGATGAAGTGGAGAGCAGAGCTTCACCT  
GAGCCAGATCTGACCCTCAGAGATTACCAGATGGAAGTTGCAAAGCCAGCACTGAATGGG

GAGAATATTATACTATGTCTTCCTACAGGCAGTGGTAAAACCAGAGTGGCTGTTTACATTAC  
CAAAGATCACCTGGATAAGAAGAAAAGAGCATCAGAGCCTGGAAAAGTTATAGTACTTGTT  
AATAAGGTACCGTTGGTAGAACAGCATTTACGAAAGGAGTTTAATCCATTCTGAAGCGTT  
GGTATCAGGTTATTGGTTTAAGTGGTGATTCTCAGCTGAAAATCTCATTTCTGAAGTTGTC  
AGAAGAAATGATGTCATCATCAGTACAGCACAGATCCTTGAGAATTCAGTGTAAATGCAGC  
CGAAGAAGATGAAGAAGGTGTCCACTTATCAGATTTTTCTACTCATCATTATTGATGAGTGC  
ATCACACTCAAAGGAAGGTGTCTACAACAATATTATGCGACGTTACTTAAACAAAAGATG  
AAGAACAAGAAGCTGGCAAAGAAAACAAACCAGTGATCCACAGCCTCAGATTCTGGGA  
CTTACAGCCTCACCTGGTGTAGGAGGTGCAACATCCTACTCAAAGCGGAAGAACATATTC  
TGAAAATTTGTGCCAATCTTGATGCATGTAGAATCATGACTGTTGAAGAGCATGCCTCCCAA  
CTGAAGAATCAGGTGAAGGAACCATATAAGAAGACTGTGATTGCAGATGACAAAAGAAGGG  
ATCCATTTAGAGAGAGAATTACTGAAATCATGACAGACATTCAAACCTATTGCCAGCTCCAT  
CCAAAATCTGAGTTTGGAAGTCAAGCATATGAACAGTGGGTGATTAGAGAAGAGAGAAGAG  
CTGCAAAGAAAGAAAAACGCAAGGAACGTGTCTGTGCAGAACACTTGAAGAAATACAATGA  
TGCTCTCCAGATAAATGACACCATCCGAATGGTGGATGCGTACAATCACCTAAATAACTTTT  
ATAAGGAGGAGAAAAAGTAAGAAGACAGTAAGGAGTGATGATGATGATGAACCATCAGTATC  
AAAACAGGATGAAACAGATGAATTTCTAATAGGTTTATTTTATTCAAAGAAACAGCTGA  
AAGAGTTGGCTAGAAAGCCAGAATATGAAAATGAGAAGCTAATACAGTTGCGAAACACTTT  
AATGGAGGAGTTCACGAAGACTGAGGAACCTAGAGGAATTATTTTACAAAGACTCGGCTA  
AGTGCCCTTTGCTCTATTCCAGTGGATTAAGGATAACCCAAAATTTGAAGAAGTGGGAATTAA  
GGCTCGTTATCTTATCGGTGCTGGACATAACAGTGAAATTAACCCATGACTCAGAATGAG  
CAAAGGGAAGTTATTGATAAATCCGAGGTGGAAATGTAAATTTACTTATTGCTACTACTGT  
AGCTGAGGAAGGCCTAGACATCAAAGAGTGTAACATTGTTATTGCTATGGCCTCGTCACC  
AATGAAATTGCTATGGTGCAGGCTCGCGGTGAGCTCGAGCTGATGAGAGCACCTATGCA  
CTTGTGGCTTCGAGTGGCTCAGGAGCTGTTGAACGTGAAGATGTTAATTTTTCCGTGAAA  
AAATGATGTATAAGGCCATTGAGCATGTCCAGAAGATGCCACAGGAGGAGTATTTAAATAA  
GATTCAGAGCTTCCAGTTGCAAAGTATAGTGGAAAAACAAATGAAGGCAAAGAGAGATCAG  
CGCAAGACATACAAGAAAAACCTTCACTAGTAACATTCTATGCAAAAATTGCCACAAGCT  
GATATGTTCTGGAGAAGACATACAAGTTATTGAAAACATGCATCATGTCAGTGTGAAAAAG  
ATTTCCAAAGTCTTTACCATACAAGAGAAAATAAGACACTGCAAGATAAGCATGCTGATTAC  
CAGACAAATGGGGAAATTATATGTAAAGATTGTGGACAAGCTTGGGGAAATATGATGGTTC  
ACCGAGGTCTTGACCTGCCTTGTCTAAAGATTAGAAATTTTGTGGTTGTGTTTGAAGACAAG  
AAAACAACAAAGCAAATTTTTAAGAAATGGGGAGAACTGCCATTAGGTTCCGTAGTTTTGA  
TTATGCAGCTCATTGGCCTTCAAGTGATGAAGATTAA

>calypte\_anna-mda5

ATGTCCCGTAGTTCCGGGCCGGCGGCAACGGCTGAGGAGTGCCAGGACGAGCGCTTCCT  
CTACATGATCTCCTGCTTCAGGCCGCGGATCAAGCAGGTTATCCGGGTGCAGCCGGTGCT  
GGACCACCTTCTCTCCCTGAGCACAGAGGAGAAGGAGAAGGTGCGGGCGGCCGCCCTGC  
AGCGGGGCGAGGTGGAGGGTGCAGGAGGAAGTGTGCGGGCCGTGGAGCGGGGGCCCC  
GCGGGTGCAGGTGGTTCCACGAGTTTCTGCAGGCGCTGGAGCACGCTGGCTGCAGCTTG  
GCCGCCTGCTATGTGAATCCGAGCCTCAGCCACCTCCCCTCGCCGGCCCAGGAGGCTGA  
CCACGACCTCTGCGTGCAGTTGGTGCAGCTGCTCCACGCCACGTTGGTGGATAAAATGCA  
GACCATCCAAGTGGCCGAGAAGTGTCTGCAGATGGGCATATTCCATGATGAGGATCTGGA  
TCGGATCCACACTGTTACTGACAATTGTGGGAACAGAGATGGTGCAAGAGAGCTACTGAG

AAGAATAGTGCAGAAGAAAGATTGGTTCTCTCCTTTTTTGTAGTGCTCTCCGTGAAACCCAAC  
ATGGACACCTTGCAGATGATTTAAGTGGAACCCAGGAGGAACAGAGAATAGACAAAATGG  
GGTGAAGAAGAGTTCAAATGAAGAAACAGAGACTACATGCCAACCAGAATATGCCATGGTG  
GAAGATTTGAAACAGCAAGAAAATGTGAAAGATAATTGCAGCAGTGAAAACAGTGAAGTGG  
GAATACCTATTGAAAAGAATTCTGTATTTTCAGAGTCGGATATCTCCATAGGAGATGAAAGT  
GTCAGTAACTTGGATGAAAACCTGGGACAAAGCTGCATAACCAGTGATTGAGATGAAGATG  
AAGTGGAGAGCAGAGCTTCACCTAAGCCAGATCTGATCCTGAGAGATTACCAGATGGAAG  
TTGCAAAGCCAGCACTGAATGGGGAGAATATTATAATATGTCTACCTACAGGCAGTGGTAA  
AACCAGAGTGGCTGTTTACATTACCAAAGATCACTTGGATAAAAAGAAAAGGGCCTCAGAG  
CCTGGAAAAGTTATAGTACTTGTTAATAAGGTACCATTGGTAGAACAGCATTTACAAACGGA  
GTTTAAACCATTCTGAAGCCGTGGTATCGGGTTATTGGTCTAAGTGGTGATTCTCAGCTG  
AAAATCTCATTCCCTGAAGTTGTCAGAAGAAATGATGTCATAATTAGTACAGCACAAATCCT  
AGAGAATTCAGTGTTAAATGCAGAAGAAGAAGATGAAGAAGGTGTCCACTTATCAGATTTTT  
CACTCATCATTATTGATGAGTGTATCATACTCAAAGGAAGGTGTCTACAACAATATAATG  
AGACGTTACTTAAAAGAAAAGATGATGAACAGGAAGCTGGCGAAAAGAAAACAAACCACTGA  
TCCCTCAGCCTCAGATTCTGGGACTTACAGCTTCCCCTGGCGTAGGAAGTGCAAAATCCTA  
CTCAAAGCTGAAGAACATATTCTGAAAATCTGTGCCAATCTTGATGCATGTAGAATCATGA  
CTGTTGAAGAGCACAGCTCCCAGCTGAAGAGTCAGGTGAAGGAACCATATAAGAAAAGTGT  
GGTTGCAGATGACAAAAGAAGGGATCCATTGAGAGAGAGAATTACTGAGATTATGACAGCC  
ATTCAAAAGTATTGCCAAGTTTATCCAAAATCTGAGTTTGGAACTCAGCCATATGAACAGTG  
GGTGATTAGAGAAGAGAGAGAAAAGCTGCAAAAAGAGAAAACGCAAGGAACGTGTCTGTGC  
AGAACACTTGAAGAAATATAACGATGCTCTCCAGATAAATGACACCATCCGAATGGTGGAT  
GCCTACAATCACCTGAACAAGTTTACAAGGAGGAGAAAAGTAAGAAGACAGTAAGGAGTG  
ATGATGATGATGATGATGCACCAGCAGTGTCAAACAGGATGAAACAGATACATTTTTTAATA  
GGTTTATTTTCATGCAAAAAGAAACAGCTAAAAGAGTTGACTAGAAAGCCAGAATATGAAAA  
TGAGAAGCTAATACAGTTGCGAAACACTTTAATGGAGGAGTTCACGAAGACCGACGAACCT  
AGAGGAATTATTTTTACAAAGACTCGTCTGAGTGCCTTTGCTCTATTCCAGTGGATTAAGGA  
TAACCCAAAATTTGAAGAAGTGGGAATTAAGCCCCATTACCTTATTGGTGCTGGACATAACA  
GTGAAACAAAACCCATGACTCAGAATGAGCAAAGAGAGGTTATTGATAAATTCCGAGGTGG  
AAATGTAAATCTACTTATTGCTACAAGTGTAGCTGAGGAGGGCCTAGACATCAAAGAGTGT  
AACATCGTTATTCGCTACGGCCTCGTCAACCAATGAAATTGCTATGATGCAGGCTCGTGGTC  
GAGCTCGAGCTGATGAGAGTACCTATGCACTTGTGGCTTCAAGTGGCTCACGAGCTATTGA  
ACGTGAAGATGTTAATATTTTCCGTGAGCAAATGATGTATAAAGCCATTCAGCGCATCCAGA  
AGATGCCTCAGGAAGAGTATTTAAATAAGATTGAGGATTTCCAGTTGCAAAGTATAGTGGAA  
AAAAAATGAAGGCAAAAAGAGATCAGCACAAAGACATACAAGAAAAACCCCTTCACTAATAAC  
ATTCCTTTGCAAAAATTGCCACAAGCTGATATGTTCTGGAGAAGACATACAAGTTATTGAAA  
ATATGCATCATGTCAGTGTGAAAAAAGATTTCCAAAGTCTTTACCATACAAGAGAAAAATAAG  
ACACTGCAAGATAAGGATGCTGATTACCTGACAAATGGGGAAATTATATGCAGAGATTGTG  
GACAAGCTTGGGGAAATTTGATGGTTCACCGAGGTCTTGACCTGCCTTGTCTAAAGATCAA  
AAATTTTGTAGTTGTGTTTGAAGACAAGAAAAACAACAAAGCATATTTTAAAGAAATGGCGAG  
AACTTCCCATCACATTCCTGAGTTTTGATTATGCAGCTCATTGTCCTTCAGAATATGAAGAC  
TGA

>camarhynchus\_parvulus-mda5

ATGGCAGAGGGCACCCGGGACGAGCGGTTCTCTACATGATCTCCTGCTTCAGGCCGCG

GCTGAAGCAGTTCATCCAGGTGCAGCCCGTGCTGGACCGGCTGCCCTCGCTGAGCGCGG  
AGGACCGGGACAGGGTGCTGGCGGCCGCCCTGCAGCGGGGCGCGGCGGGCGGGCGCCG  
AGGAGCTGCTGCGGGCCGTGGAGCGGGGGCCCCGCGGCTGCGGCTGGATCCCCGAGTT  
CCTGCAGGCGCTGGAGCACGGCGGCTGCAGCCTGGCCGCCTGCTACGCCAACCCCAGC  
CTCAGCCAGCTGCCCTCGCCGGCAGAGGAGGCCGAGCACGACCTCTGCGTGACCTGGT  
GCAGCTGCTGCACGGCACGCTGGTGGACAAGATGCGCGCCGGGCAGGTGGCCGAGAAG  
TGCCTGCAGATGGGAATCTTCCAGGACGAGGACGTGGATCGGATCCAGACTGTTACTGAC  
AATCGTGGGAACAGGGATGGTGAAGGGAGCTACTGAGCAGAATAGTCCAGAAGAAAGAC  
TGGTTCTCTTCTTTTTTATTGCTCTCCGTGAAACCCAACATGAAGACCTTGACAGATGATTT  
AAGTGGAAATACAGGAGAGAATAAACAAAATGGGATGGAGCAGACTACGAACGAAGAAAC  
AGAAGTTACAAGCCAACCAGGATACGTCATAGAGGAGAATTTGAAACAGGAAGAAAATGTG  
GATGATAGTTTTAGCAGTGAGAACAGTCTGTTGGAAACATCCATAGAAAAGAATTCTGTGAT  
GTCAGAGTCAGATGTTTCCATAGGAGATGGAAGTGTGAGTAAGTTGAATGGAACTGGAGC  
TGCACAACCAAGTGATTCAGATGAAGTGGAGAGGAGAGCCTCACCTGAGCCAGATCTGACC  
CTGAGAGATTACCAGATGGAAGTTGCAAAGCCAGCATTGAATGGGGAGAATATTATCATAT  
GTCTCCCTACAGGCAGTGGTAAAACCAGAGTGGCTGTTTACATTACCAAAGATCACTTGA  
TAAGAAAAAAGAGCATCAGAGCCTGGAAAAGTCATAGTACTTGTTAATAAGGTTCCGTTG  
GTAGAACAGCATTTAAAAAGAGAGTTTAGTCCATTCTGAAGCGTTGGTATCAGGTTATTGG  
TTTAAGTGGTGATTCTCAGCTCAAATCTCATTTCTGAAGTTGTCAGAAGAAATGATGTCA  
TCATCAGTACAGCACAGATCCTTGAGAATTCAGTGTAAATGCATCCAAAGAAGATGAAGAA  
AGTGTCCACTTATCAGATTTTTCCCTCATCATCATCGATGAGTGTGATCATACTCAAAGGA  
AGGTGTCTACAATAACATAATGAGACGTTACTTAAAAGAAAAGATGAAGAACAGGAAGCTG  
GCAAAGAAAACAAACCATTGATCCCGCAGCCTCAGATTCTGGGACTTACAGCCTCACCTG  
GTGTAGGAGGTGCAACATCCTACTCAAAGCTGAAGAGCATATTCTGAAAATCTGTGCCAA  
TCTTGATGCATGTAGAATTATGACTGTTGAAGAGCATGCCTCCCAGCTAAAGAATCAGGTG  
AAGGAACCATCTAAGAAGACTGTGATTGCAGATGATAAAAAAAGGGATCCATTTAAGAGA  
GAATCACTGAGATCATGACAGAAATACAAAATATTGCCAGCTGCATCCGAAGTCTGAGTT  
TGGAACCTCAGACATATGAACAGTGGGTGATCAGAGAAGAGAGAAGAGCTGCAAAAGAAGA  
AAAACCCAGGGAACGTGTCTGTGCAGAGCACTTGAAGAAATACAATGATGCTCTCCAGATA  
AATGACACCATCCGAATGGTGGATGCCTACAATCACCTAAATAACTTCTATAAAGAGGAGA  
AAAGTAAGAAGACAGTAAGGAGTGATGATGATGATGATGATGATGATGAGCCAGCAGTATC  
AAAACAGGATGAAACAGATAAATTTCTAATAGGTTTATTTTCATGCAAAAAAGAAACAGCTGA  
AAGAGTTGACTAGAAAGCCAGAAAATGAAAATGAGAAGCTAATGGAGTTGAGAAATACTTT  
AATGGAGGAGTTCACGAAGACTGAAGAACCTAGAGGAATCATTTTCACAAAGACTCGTCTA  
AGTGCCTTTGCTCTTTTCCAGTGGATTAAGGACAACCCAAAATTTGAAGAAGTAGGAATTAG  
AGCCCATTATCTTATCGGCTCTGGACATAAGAGTGAAATGAAGCCCATGACTCAGAATGAG  
CAAAGGGAAGTTATTGATAAATTTGATGTGGAAGTGTAATTTACTAATTGCTACTACTGT  
AGCTGAGGAAGGCCTGGACATCAAAGAGTGTAACATCGTTATTCGCTACGGCCTTGTGACA  
AATGAAATTGCTATGGTGCAGGCTCGTGGTAGAGCTCGAGCTGATGAAAGCACCTATGCTC  
TTGTGGCTTCAAGTGGCTCAGGGGCTGTTGAACGTGAAAATGTTAATACTTTTCGCGAGAA  
AATGATGTATACAGCCATTACGCGTGTCCAGAAGATGCCACAGGAAGAGTATTTAAATAAG  
ATTCAGAGTTTCCAGGTCCAAAGTGTAGTGGAAAAACAAATGAAGGTGATGAGAGAACAGC  
ACAAGACATACAAGAAAAATCCTTCACTAATAAAATTCTTATGCAAAAATTGCTCCAAGCCG  
ATATGTTCTGGAGAAGACATACAAGTTATTGAAGACATGCATCATGTCAGTGTGAAAAAAGA

TTTCCAAAGTCTTTATCATACAAGAGAAAATAAAACACTGCAAGATAAGCATGCTGATTACC  
AGACAAATGGGGAAATTATATGCAAAGACTGTGGACAAGCTTGGGGAAATATGATGGTTCA  
CCGAGGTCTTGACCTGCCCTGTCTAAAGATCAGAAATTTTGTGGTCGTGTTTGCAGACAAG  
AAAACAACAAACAATATTTTTAAGAAATGGGGAGACCTGCCCATCAGGTTTCCTAGTTTTGA  
TTATGCAGCTCATTGTCCTTCAAGTGATGAAGATTAA

>casuarius\_casuarius-mda5

ATGTCGGCGGAGTCCGGAGCCGAGCGCTTCCTCTACATGATCCTGTGCTTCAGGGCGCG  
GCTGAAGCGCGTCATCCGCGTGACGCCGGTGCTGGACTGGCTGCCCTCGCTGAGCGCCG  
AGGAGCGGGAGCGGGTGCGGGCCGCGGCGCTGCAGCAGGGCGAGGTGGAGGCGGCGG  
AGCTGCTGCTGCGCGCCGTGGAGCGGGGGCCCCGCGACCACTTCCCCGAGTTCCTGCAG  
GCGCTGGAGCGCGGCGGCTGCGGCCTGGCCGCCTGCTACGTGAACCCAGCCAGCTGC  
CCTCGCCGGCGGAGGAGGCTGAAAACGACCTCTGCGTGCACTTGGTGCAGCTGCTCCAC  
GGCACGCTGGTGGATAACATGCGTGCCACGCAGGTGGCCGAGAAGTGCCTGCAGATGGG  
CATCTTTCCAGGTCGAGGAGTGAGCGGATCCAGACCGTTACTGAAAGTCGTGGGAATAG  
AGATGGTGCAGGGAGCTGCTAAGTAGAATAGTTCAGAAGAAGGACTGGTTCTCCCCTTTT  
TTGATTGCTTTGCGTGAAACCCAGCATGAAGACCTTGCAAATGATTTAAGTGGAATACAAG  
AGGAGTAGAAAATAGAGAAAATGGGATGAATAACAGGACAAATGAAGAAGCAGAAGTCGC  
AATGCAACCGGGACATGCCGTAGTGAGAAATTTCAAACAGCAAGAAAATATGAATGATAGT  
TTAGGCAGTGAGAGCATTGTTTCGGAAATATCTGTTGGAGAGAATTCTGTAGCTTCAGAGT  
CTGATGTCTCTGTAGGAGATGGAAGTGTCAAGTAATGTGAATGAAAACCTGGGACAGAGCA  
GCAGCACAACCAGTGATTCAGATGAAGATGAAGTGGAGAGCAGAGCTTCACCTGAGCCAG  
AGCTGATCCTGAGAGATTACCAGATGGAAGTTGCAAACACAGCATTGAATGGGGAGAATAT  
TATAATATGTCTCCCTACAGGCAGTGGTAAAACCAGAGTGGCTGTTTACATTACCAAAGATC  
ACTTGGAATAAGAAGAGAAGAGCATCAGAGCCTGGAAAAGTTATAGTACTTGTTAATAAGGT  
ACCATTGGTGGAAACAGCATTACGAAAGGAGTTTCATCCATTCTGAAGCGTTGGTATCAG  
GTTATTGGTTTAAGTGGTGATTGTCAGCTGAAAATCTCATTTCTGAAGTTGTCAAAAGAAA  
TGATGTCATAATCAGTACAGCCCAGATCCTTGAGAATTCAGTGTAAATGCAACTAAAGAAG  
ATGAGGAAGGTGTCCATTTATCAGATTTTTCACTTATCATTATTGATGAATGTCATCACACTC  
AAAAGGAAGGTGTCTACAACAATATAATGCGACGTTACTTAAAAGAAAAGATGAAGAATGG  
GAAGCTGGCAAAGAAAACAGACCATTCTGTTCCACAGCCTCAGATTCTGGGACTTACAGCC  
TCACCTGGTGTAGGAGGTGCAACATCCTATTTGAAAGCTGAAGAACATATTCTGAAAATCT  
GTGCCAATCTTGATGCATGTAGAATCATGACTGTTGAAGAGCATGCCTCCCAACTGAGGAA  
TCAGGTGAAGGAACCATATAAGAAGACTGTGATTGCGGATGACAAAAGAAGGGATCCATTT  
AGAGAGAAAATTATTGAGATCATGACAGACATTCAAACCTATTGCCAGCTCCATCCAAAATC  
TGAGTTTGGAACCTCAGCCATATGAACAGTGGGTGATTAGAGAGGAGAAAAAAGCGGCAAA  
AGAAGAAAAACGCAAGGAACGTGTCTGTGCAGAACATCTGAAGAAATACAATGATGCTTTG  
CAAATAAATGACACTATTCGAATGGTTGATGCATACAATCACCTACGTAACCTTTTATAAGGA  
GGAAAAAAGCAAAAAAACAGTAGTGAGTGATGATGAGGATGAACCAGCAGTATCCAAACAG  
GATGAAACAGATGAATTTCTAATGGGTTTATTCAATGCAAAGAAGAAACAGCTGAAAGAGTT  
GGCTAGAAAGCCCGAATATGAAAATGAGACTCTAACAAAGTTGCGAAACACTTTAATGGAG  
GAGTTCACAAAGACTGTTGAACCGAGAGGAATTATTTTCACAAAGACCCGGCAAAGTGCCT  
TTGCTCTGTTCCAGTGGAATTAAGGATAACACAAAATTTGAAGAAGTGGGAATTAAGGCCCA  
TTATCTTATTGGCGCTGGACACAACAGTGAACTAAACCCATGACTCAGAATGAGCAAAGG  
GAAGTCATTGGTAAATTCCGAGATGGAAGTGTAACCTTACTCATTGCTACTACTGTAGCTGA

GGAAGGCCTGGACATCAAGGAGTGTAACATTGTTATTCGCTATGGCCTTGTCACCAATGAA  
ATTGCTATGTTGCAGGCTCGTGGTCGAGCTCGAGCTGATGAGAGCACCTATGCACTTGTG  
GCTTCAAGCGACTCAGGAGCTGTTGAACGTGAGGATGTTAATAGTTTCCGTGAGAAAATGA  
TGTATAAGGCCATTCAAGCGTGTCCAGAAGATGCCACAGAAAGAGTACTTAAACAAGATTCA  
GACCTTCCAGTTGCAAAGTATAATGGAAAAAAGAATGAAGGCAAAGAGAGATCAGTGTAAG  
ACATATAAGAAAAATCCTTCACTAATAAAATTCCCTATGCAAAAATTGCCACAAGCTGATATGT  
TCAGGAGAAGATATACAAGTTATTGAAAACATGCATCACGTCAAGTGTAAGAAGATTTTCA  
AAGCCTTTACCATAACAAGAGAAAATAAGACACTGCAAGATAAACATGCTGATTACCAGACAA  
ATGGGGAAATTATATGTAAAGACTGTGGACAAGCTTGGGGAAATATGATGGTTCCACCGAGG  
TCTTGACCTGCCTTGCCTAAAGATTAAAAATTTTGTGGTTGTGTTTGAAGACAAGAAAAACA  
TAAAGCAAATTTTAAAGAAATGGGGAGAACTGCCAGTCAGGTTCCCTGTTTTTATTATGCA  
GGTCATTGTCTTCAAGTGATGAAGATTAA

>catharus\_ustulatus-mda5

ATGGCAGACAGCACCCGGGACGAGCTGTTCTCTACATGATCTCCTGCTTCAGGCCGCGG  
CTGAAGCAGTTCATCCAGGTGCAGCCCGTGCTGGACCGGCTGCCGTGCTGAGCGCGGA  
GGACAGGGACAGGGTGCGAGCGGCCGCGGTGCAGCGGGGCGAGGCGGAGGGCGCCGA  
GGAGCTGCTGCGGGGCCGTGGAGCGGGGGCCCCGCGGCTGCGGCTGGGTCCGCGAGTTC  
CTGCTGGCGCTGGAGCAGGGCGGCTGCGGCCTGGCCGCCTGCTACGCCAGCCCCAGCC  
TGAGCCAGCTGCCCTCGCCGGAGGAGGAGGCCGAGCACGACCTGTGCGTGCAGCTGCTG  
CAGCTGCTGCACGGCACGCTGGTGGACAGGATGCGCGCCGTGCAGGTGGCCCAGAAGTG  
CCTGGAGATGGGAATCTTCCAGGACGAGGACATGGAACGGATCCAGACTGTAAGTGACAA  
TCGTGGGAACAGAGATGGTGCAAGGGAAGTACTGAGCAGAATAGTCCAGAAGAAACATTG  
GTTCTCTTCTTTTTTGGTTGCTCTCCGTGAAACCAACATGAAGACCTTGCATGTGATTAA  
GTGGAAATACAGGAGAGAATAAACAAAAATGGGATGGAGCAGACTACAAATGGAGAAACAG  
AAGTTAGAAGCCAACCAGAATACGCCATACAGGAGAATTTGAAACAGGAAGAAAATGTGGA  
CGATAGTTTCAGCAGTGAGAACAGTGTGTTGGAACATCCATAGAAAAGAATTCTGTGCTG  
TCAGAGTCAGATGTCTCCATAGGAGATGGAAGTGTGAGTAACTTGAATGACAACCTGGGAC  
AGAGCTACACAACCAAGTGATTCAGATGGAGAGGAGAGGAGAGCCTCACCTGAGCCAGATC  
TCACCCTGAGAGATTACCAAATGGAAGTTGCAAAACCAGCACTGAATGGGGAGAATATTAT  
AATATGCCTCCCTACGGGCAGTGGTAAAACCAGAGTGGCTGTTTACATTACCAAAGATCAC  
TTGGATAAGAAGAAAAGAGCATCAGAGCCTGGAAAAGTCATAGTACTTGTAAATAAGGTTT  
CATTGGTAGAACAGCATTTACAAAGAGAGTTTACTCCATTCTGAAGCGTTGGTATAAGGTT  
ACTGGTTTAAGTGGTGATTCTCAACTGAAAATCTCATTTTCTGAAGTTGTCAGAAGAAATGA  
TGTCATCATCAGTACAGCACAGATCCTTGAGAATTCAGTGTAAATGCATCCAAGGAAGAG  
GAAGACAGTGTCCACTTATCAGATTTTTCCCTCATCATTATCGATGAGTGTATCACACTCA  
AAAGGAAGGTGTCTACAACAATATAATGCGACGTTACTTAAAAGAGAAGATGAAGAACAGG  
AAGCTGGCAAAAGAAAACAAACCACTGATCCACAGCCTCAGATTCTGGGACTTACAGCCT  
CACCTGGTGTAGGAGGTGCAACGTCCTACTCAAAAGCTGAAGAACATATTCTGAAAATCTG  
TGCCAATCTTGATGCATGTAGAATTATGACTGTTGAAGAGCATGCCTCCAGCTAAAGAAT  
CAGGTGAAGGAACCGTCTAAGAAGACTGTGATTGCAGATGACAAAAAAGGGATCCATTTA  
AAGAGAAAATTACTGAGATCATGACAGAAATACAAAATCTATTGCCAGCTGCATCCAACTGT  
GAGTTTGGAACTCAGACATATGAACAGTGGGTGATCAGAGAAGAGAGAAGAGCTGCAAAA  
GAAGAAAAACGCAGGGAACGTGTCTGTGCAGAACACTTGAAGAAGTACAACGATGCTCTC  
CAGATAAATGACACCATCCGAATGGTGGATGCCTACAATCACCTAAATAACTTTTATAAAGA

GGAGAAAAGTAGGAAGACAGTAAGGAGTGATGATGATGAGGAGGAGGAACCAGCAGTATC  
AAAACAGGATGAAACAGATGAATTTCTATTAGATTTATTTTCATGCAAAAAAGAAACAACTGAA  
AGAGTTGACTGGAAAACCAGAAAATGAAAATGAGAAGCTAATAAAGTTGAGAAATACTTTAA  
TGGAGGAGTTCACGAAGACTGAAGAACCTCGAGGAATCATTTTTACAAAGACTCGTTTAAG  
TGCCTCTGCTCTATACCATTGGATTAAGGACAACCCAAAATTTGAAGAAGTGGAATTAGG  
GCCCATTATCTTATTGGCTCTGGACATAAGAGTGAAATGAAGCCCATGACTCAGAACGAGC  
AAAGGGAAGTTATTGATAAATTTTCGACATGGAAATATAAATTTACTAATTGCTACTACTGTAG  
CTGAAGAAGGCCTGGACATCAAAGAGTGTAACATTGTTATTCGCTATGGCCTCGTCACCAA  
TGAAATTGCTATGGTGCAGGCTCGCGGTAGAGCTCGATCTGATGAAAGCACCTATGCTCTT  
GTGGCTTCAAGTGGCTCAGGGGCTGTTGAACGTGAAGATGTTAATATTTTTTCGTGAGAAAA  
TGATGTATAAGGCCATTCAGCGAGTCCAGAAGATGCCACAGGAAGAGTATTTAAATAAGAT  
TCAGAGTTTCCAGTTGCAAAGTATAGTGGA AAAACAAATGAAGGCCAAAGAGAGATCAGTGC  
AAGACATACAAGAAAAATCCTTCACTAATAAAATTCTTATGCAAAAATTGCTCCAAGCCGAT  
ATGTTCTGGAGAAGACATACAAGTTATTGAAGACATGCATCATATCAGTGTGAAAAAAGATT  
TCCAAAGTCTTTATCATACAAGAGAAAAATAAAACACTGCAAGATAAGAATGCTGATTACCAG  
ACAAATGGGGAAATTATATGCAAAGACTGTGGACAAGCTTGGGGAAATATGATGGTTCACC  
GAGGTCTTGACCTGCCTTGTCTAAAGATTAGAAATTTTGTGGTTGTGTTTGCAGACAAGAAA  
ACAACAAAGCACGTTTTTAAAAAGTG GGGGAGAGCTGCCCATCAAGTTTCCTAGTTTTGATTA  
TGCAGCTCATTGTCCTTCGAGTGATGAAGATTAA

>charadrius\_alexandrinus-mda5

ATGGCGGAGGAGTCCCGAGACGAGCGCTTCCTCTACATGATCTCCTGCTTCAGGCCGCGG  
CTGAAGCAGGTCATTCAGGTGCAGCCGGTGCTGGACCGGCTTCCTCGCTGAGCGCGGA  
GGACCGGGAGAGGGTGCGGGCGGCCGCCCTGCAGCGGGGCGACGTGGATGGGGCGGA  
GGAGCTGCTGCGGGCCGTGGAGCGGGGGCCCCGCGGGTGCGGCTGTTCCACGAGTTC  
CTGCAGGCGCTGGAGCAGGGGGGCTGCAGCCTGGCTGCCTGCTATGTGAACCCACGCCT  
CAACCAGCTGCCGTGCCAGCCGAGGAGGCCGACCATGACCTCTGTGTGCACTTGGTGC  
AGCTGCTCCACAGCACACTGGTGGATAGAATGCAGACCATGCAGGTGGCTGAGAAGTGCC  
TGCAGATGGGCATCTTCCAGGATGACGACCTGGATCGGATCCACGCTGTTACTGACAATC  
ACGGGAACAGAGATGGTGCAAGGGAGCTACTGAGCAGAATAGTGCAAGAAGAAAGACTGGT  
TCTCTCCTTTTTTGTAGTGCTTTGCGTGAAACCCAACATGGAGACCTTGCAAGTGAATTAAGC  
GGAAATACAGAAGGAACAGAGAATAGACAAAATGGAATGAAAAACAGTACAAGTGAAGAAA  
CAGAAGTTACAAGCCAACCAGGATACGCTGTAGTGAAAGATTTGAAACAAGAAGAAAATGT  
GAACGATAGTTTCAGCAGTGAGAACAGTGTAAGTGGAAACATCTATTGGAAAGAATTCTGGA  
GTTTCAGAGTCAGATGTCTCCATAGAAGATGGAAGTGTTGGTAACTTGAATGAAAACCTGG  
GACAGAGCTGCACTACCACTGATTGAGATGAAGATGAACTGGAGAGCAGAGCTTCGCCTG  
AGCCAGATCTGATCCTGAGAGATTACCAGATGGAAGTTGCAAAGCCAGCACTGAATGGGG  
AGAATATCATAATATGTCTGCCTACAGGCAGTGGTAAAACCAGAGTGGCTGTTTACATTACC  
AAAGATCACTTGGATAAGAAGAAAAGAGCATCAGAGCTTGGAAGTTATAGTACTTGTTAA  
TAAGGTACCATTGGTAGAACAGCATTTACGAAAGGAGTTTAATCCATTCCTGAAGCGTTGG  
TATCAGGTTATTGGTTTAAAGTGGTGATTCTCGGCTGAAAATCTCATTTCCTGAAGTTGTCAG  
AAGAAATGATGTCATCATCAGTACAGCACAGATCCTTGAGAATTCAGTGTAAATGCAGCC  
GAAGAAGATGAAGAAGGTGTCCACTTATCAGNNNNNNNNNNNNNNNTTATCGATGAGTGT  
CATCACACTCAAAGGAAGGTGTCTACAACAATATAATGCGACGTTACTTAAAGAAAAGAG  
GAAGAACAGGAAGCTGGAAAAAGAAAACAAACCAGTGATCCACAGCCTCAGATTCTGGG



ACTTACAGCCTCACCTGGTGTAGGAGGTGCAAAATCCAACCTCAAAAGCTGAAGAACATATT  
CTGAAAATCTGTGCCAATCTTGATGCACGTAGAATCATGACTGTTGAAGAGCATGCCTCCC  
AATTGAAGAATCAGGTGAAGGAACCGTATAAGAAGACTGTGATTGCAGATGACAAAAGAAG  
GGATCCATTTAGAGAGAAAAATTACTGAGATCATGAGAGACATTCAAAACTATTGCCAACTCT  
ATCCAAAATCTGAGTTTGGAACCTCAGCCATATGAACAGTGGGTGATTAGAGAAGAGAAAAA  
AGCTGCAAAAGAAGAAAAACGCAAGGAACGTGTCTGTGCAGAACACTTGAAGAAATACAAT  
GATGCTCTCCAGATAAATGACACCATCCGAACAGTGGATGCATACAATCACCTAAATAACTT  
TTATAAGGAGGAGAAAAAGTAAGAAGACAGTAAGGAGTGATGATGATGATGAACCAGCA  
GTATCAAAACAGGATGAAACAGATGAATTTCTAATAGGTTTATTTTCATGCAAAGAAGAAACA  
GTTGAAAGAGTTGGCTAGAAAGCCAGAATATGAAAATGAGAAGCTAATACAGTTGCGAAAC  
ACTTTAATGGAGGAGTTCACGAAGACTGAAGAACCTAGAGGAATTATTTTCACAAAGACTC  
GGCTAAGTGCCTTTGCTCTATTCCAGTGGATTAAGGATAACCCAAAATTTGAAGAAGTGGG  
AATTAAGGCCCATTTATCTTATTGGTGCTGGACATAACAGTGAAGTTAAACCCATGACTCAGA  
ATGAGCAAAGGGAAGTCATTGATAAATTCCGAGGTGGAAGTGTAATTTACTTATTGCTACT  
ACTGTAGCTGAGGAAGGCCTAGACATCAAAGAGTGTAACATCGTTATTCGCTATGGCCTCG  
TCACCAATGAAATTGCTATGGTGCAGGCTCGCGGTCGAGCTCGAGCTGATGAGAGCACCT  
ATGCACTTGTGGCTTCGAGTGTCTCAGGAGCTGTTGAACGTGAAGATGTTAATATTTTCCG  
TGAGAAAATGATGTATAAGGCCATTCAGCGTGTCCAGAACATGCCGCAGGAAGAGTATTTA  
AAGAAGATTGAGAATTTGCAGTTGCAAAGTATAGTGGA AAAACAAATGAAGGCAAAGAGAG  
ACCAGCACAAAACATACAAAAAAAATCCTTCACTAGTAACATTGCTATGCAAAAATTGCCAC  
AAGCTGGTATGTTCTGGAGAAGACATACAAGTTATTGAAAACATGCATCATGTCAGTGTGAA  
AAAAGACTTCCAACTCTTTACAATACAAGAGAAAATAAGACACTGCAAGATAAGCATGCCG  
ATTACCAGACAAACGGGGAAATTATATGTAAAGATTGTGGACAAGCTTGGGGAAATATGAT  
GGTTCACCGAGGTCTTGACCTGCCTTGTCTAAAGATCCGAAATTTTGTGGTTGTGTTTGAA  
GACAAGAAAACAACGAAGCACATTTTTTAAGAAATGGGGAGAACTGCCCGTCAGGTTTCCTA  
GTTTAGATTATGCAGCTCATTGTCTTCAAGTGATGAAGATTAG

>chiroxiphia\_lanceolata-mda5

ATGGAAGAGGGGGACCGTGACGAGAGGTTCTCTACATGATCTCCTGCTTCAGGCCGCGG  
CTGAAGCAGTTCATCCAGGTGCAGCCCGTGCTGGACCAGCTCCCCTCGCTGAGCGCGGA  
GGAGAGGGGAGAAGGTGCGGGCGGCCCTCCTGCAGGGGGGCGAGGTGGCGGGGGCCGA  
AGAGCTGCTGCGGGCCGTGGAGCGGGGACCCCGCGGCTGCGGCTGGTTCCACGAGTTT  
CTGCAGGCACTGGAGCACGGCGGCTGTAGCCTGGCCGCTGCTACGCCAACCCAGCCT  
CAGCCAGCTGCCCTCGCCGGCCGAAGAGGCCGACCACGACCTCTGCGTGCACCTGGTGC  
AGCTGCTCTACAGCACGCTGGTGGACAGGATGCGGGCCGTGCAGGTGGCCGAGAAGTGC  
CTGGAAATGGGCATCTTCAAGGAGGAGGACCTGGAGCGGATCCAGACTGTTACTGACAAT  
CGTGGGAACAGAGAGGGTGCAAGGGAGCTTCTGAGCAGAATAATGCAGAAGAAAGATTGG  
TTCTCTCCTTTTTTGATTGCTCTCCGTGAAACCCAACATGGAGACCTGGCAGATGATTTAAG  
TGGAATACAGGAGGAACAGAGAATAGACAAAATGAGATGAAGAACAGTACAAATGAAGAA  
ACAGAAATTACAAGCCAACCAGGATATGCCACGGTGGAGGATTTGAAACAGCAAGAAAATG  
TGAATGATAGTTTCATCAGTGAGAACAGTGTATTGGAACATCCATGGGAGAGAATTCTGTA  
GATTCAGATTCAGATGTCTCCATAGGAGATGGAAGTGTCCGTAACCTTCAGTGAAAACCTGG  
GCCAGAGCTGCACAACCAGCAATTCAGATGAAGAGGAGAGGAGAGCTTCACCTGAGCCAG  
ATCTGACCCTGAGAGATTACCAGATGGAAGTTGCAAAGCCAGCACTGAATGGGGAGAATAT  
TATAATATGTCTCCCTACAGGCACTGGTAAAACCAGAGTGGCTGTTTACATTACCAAAGATC

ACTTGGATAAGAAGAAAAGAGCATCAGAGCCTGGAAAAGTCATAGTACTTGTTAATAAGGT  
ACCACTGGTACAACAGCATTTAGAATCAGAGTTTCATCCATTCTGAAGCGTTGGTATCAG  
GTTATTGGTTTAAGTGGTGATTGTCAACTGAAAATCTCATTTCTGAAGTTGTCAGAAGAAA  
TGATGTCATCATCAGTACAGCACAAATCCTTGAGAATTCAGTATAAATGCAGACAAAGAAG  
ATGAAGAAGGTGTCCACTTATCAGATTTTTCCCTTGTCATTATTGATGAGTGTATCACACG  
CAGAAGGAAGGTGTCTACAACAATATAATGCGACGTTACTTAAAAGAAAAGATGAAGAACA  
GGAAGCTGGCAAAAGAAAACAAACCACTGATCCCACAGCCTCAGATTCTGGGACTTACAG  
CCTCACCTGGTGTAGGAGGCGCAAGATCCTACGCAAAAGCTGAAGACCATATTCTGAAAAT  
CTGTGCCAATCTTGATGCATGTAGAATTATGACTGTTGAAGAGCATGAGGACCAGTTAAAG  
AATCAGGTGAAGGAGCCGTCCAAGAAGACTGTGGTTGCAAATGACAAAAAAGGGATCCA  
TTTAGAGAGAAAATTACTGAGATCATGACAGAAATACAAAATCTATTGCCAGCTCCATCCAAA  
ATCCGAGTTTGGAAGTACAGACATATGAACAGTGGGTGATCAGAGAAGAGAGAAGAGCTGC  
AAAAGAAGAAAAACGCAAGGAACGTGTCTGTGCAGAACACTTGAAGAAATACAATGATGCT  
CTCCTGATAAATGACAGTATCCGAATGGTGGATGCATACAATCACCTAAATAACTTTTATAA  
GGAGGAGAAAAGTAAGAAGACAGTAAGGAGTGATGATGATGATGATGATGAACCAGCTGT  
ATCAAAACAGGATGAAACAGATGAATTTCTAATAGGTTTATTTTCATGCAAAAAAGAAGTGGC  
TGAAAAAGTTGGCTGGAAAGCCAGAACATGAAAATGAGAATCTAATACAGTTGCGAAATAC  
TTAATGGAGGAGTTTACGAAGACTGAGGAACCCAGAGGAATTATTTTCACAAAGACTCGT  
CTAAGTGCCTTTGCTCTATTCCAGTGGATTCAAGACAATCCAAAATTTAAAGAAGTGGGAAT  
TAAGGCCCATTTATCTTATCGGCTCTGGACATAACAGTGAAATGAAACCCATGACTCAGAAT  
GAGCAAAGGGAAGTTATTGATAAATTCCGATGTGGAAATGTCAATTTACTTATCGCTACTAC  
TGTAAGTGTGAGGAAGGCTTGGACATCAAAGAGTGTAACATCGTTATTCGCTATGGCCTTGTC  
ACCAATGAAATTGCTATGGTGCAGGCTCGTGGTGCAGCTCGAGCTGATGAAAGCACCTAT  
GCTCTTGTGGCTCCGAGTGGCTCAGGAGCTGTTGAACGTGAAGATGTTAATATTTTCCGTG  
AGAAAATGATGTATAAGGCCATTACAGCGTGTCCAGAAGATGCCACAGGAAGAGTATTTAAA  
TAAGATTGAGAATTTCCAGTTGCAAAGTATAGTGGAACAAATGAAGGCAAAGAAAGATC  
AGCGCAAGACATACAAGAAAAATCCTTCACTAATAACATTCTTATGCAAAAATTGCCACAAA  
ACGATATGTTCTGGAGAAGACATACAAGTTATTGAGTACATGCATCATGTGAGTGTGAAAAA  
AGATTTCCAAAGCCTTTATCATACAAGAGAAAATAAGACACTGCAAGATAAGCATGCTGATT  
ACCAGACAAATGGGGAAATTATATGTAAAGATTGTGGACAAGCTTGGGGAAATATGATGGT  
TCACCGAGGCCTTGACCTACCTTGTCTGAAGATTAGAAATTTTGTGGTTGTGTTTGCAGACA  
AGAAAACAACAAAGCAAATTTTTTAAGAAATGGGGAGAACTGCCCATCAGGTTTCCTAGTTTT  
GATTATGCAGCTCATTGTCCTTCAAGTGATGAAGATTAA

>chlamydotis\_macqueenii-mda5

ATGGCAGCCCAATCTCGGGACGAGCGCTTCCTCTACATGATCTCCTGCTTCAGGCCGCGG  
CTGAAGCAGTTCATCCGTGTGCAGCCGGTGCTGGATCGGCTTCCCTCGCTGAGCGCCGA  
GGACAGGGAGAAGGTGCGGGTGGCCGCCCTGCAGCGGGGCGAGGTGGAGGGGGCGGA  
GGAGCTGCTGCGGGCCGTGGAGCGGGGGCCCCGCGGGTGCGGCTGGTTCCACGAGTTC  
CTGCAGGCGCTGGAGCACGGCGGCTGCAGCCTGGCCGCTGCTACGTGAACCCAGCCT  
CAGCCAGCTGCCCTCGCCGGCCGAGGAGGCCGACCACGACCTCTGCGTGCATTGGTGC  
AGCTGCTCCACAGCACGCTGGTGGACAAAATACAGAGCGTGCAGGTGGCTGAGAAGTGC  
CTGCAGATGGGCATCATCCAGGAGGAAGACCTGGATCGGATCCACACTGTAAGTACAAT  
CATGGTAACAGAGATGGTGCAAGGGAGCTACTGAGCAGAATAGTGCAGAAGAAAGATTGG  
TTCTCTCCTTTTTTGATTGCTCTGCGTGAAACCCAACATGGAAGCCTTGCAGATGACTTAAG

CGGAAATACAGGAGGAACAGAGAACAGACAGAATGAGATGAACAGTACAAACGAAGAAAC  
AGAAGTTACAAGCCAACCAGAATACGCTGTAGTGGAGGATTTGAAACAGCAAGAAAATGTG  
AATGATAGTTTCAACAGTGAGAACAGTGTATTGGAAACATCTATTGGAAAGAATTCTGTAGT  
TTCAGAGTCAGATGTCTCCATAGGAAATGGAAGCATCAGTTACTTGAATGAAAACCTGGGA  
CAGAGCTGCACAACCAGTTCAGATGAAGATGAAGTGGAGAGCAGAGCTTCCCCTGAGCCA  
GATCTGATCGTGAGAGATTACCAGATGGAAGTTGCAAAGCCAGCACTGAATGGGGAGAAT  
ATTATAATATGTCTCCCTACAGGCAGTGGTAAACTAGAGTGGCTGTTTACATTACCAAAGA  
TCACTTGGATAAGAAGAAAAGAGCATCAGAGCTTGGAAAAGTTATAGTACTTGTTAATAAGG  
TACCATTGGTGGAAACAACATTTACGAAAGGAGTTCAATCCATTCTTGAAGCATTGGTATCAG  
GTTATTGGTTTAAGTGGTGATTCTCAGCTGAAAATCTCATTTCTGAAGTTGTCAGAAGAAA  
TGATGTCATAATCAGTACAGCACAGATCCTTGAGAATTCAGTGTAAATGCAGCCGAAGAA  
GGTGAAGAAGGTGTCCACTTATCAGATTTTTCACTCATCATTATTGATGAGTGTATCACAC  
TCAAAGGAAGGTGTCTACAACAATATAATGCGACGTTACTTAAAAGAAAAGATGAAGAACA  
GGAACTGGCAAAGAAAACAAACCACTGATCCCACAGCCTCAGATTTTGGGACTTACAGC  
CTCACCTGGTGTAGGAGGTGCAACATCCTACTCAAAGCTGAAGAACATATTCTGAAAATC  
TGTGCCAATCTTGATGCATGTAGACTCATGACTGTTGAAGAGCATGCCTCCCAATTGAAGA  
ATCAGGTGAAGGAACCATATAAGAAGACTGTGATTGCAGATGACAAAAGAAGGGATCCATT  
TAGAGAGAGAATTACTGAGATCATGACAGACATTCAAACCTATTGCCAGCTCCATCCAAAT  
CTGAGTTTGGAACTCAGCCATATGAACAGTGGGTAATTAGAGAAGAGAGAAGAGCTGCAAA  
AGAAGAGAAACGCAAGGAACGCGTCTGTGCAGAACACTTGAAGAAATACAATGATGCTCTC  
CAGATAAATGATACCATCAGAATGGTGGATGCATACAATCACCTAAATAACTTTTATAAGGA  
GGAGAAAAGTAAGAAGACAGTAAGGAGTGATGATGATGATGATGAACCAGCAGTATCA  
AAACAAGATGAAACAGATGAATTTCTAATAGGATTATTTAATGCAAAAAGAAACAGCTGAA  
AGAGTTGGCTAGAAAGCCAGAATATGAAAATGAGAAGCTAATACAGTTGCGAAACACTTTA  
ATGGAGGAGTTCACGAAGACTGAGGAACCTAGAGGAATTATTTTCACAAAGACTCGTCTAA  
GTGCCCTTTGCTCTATTCCAGTGGATTAAGGATAACCCAAAATTTGAAGAAGTGGGAATTAAG  
GCCCATTATCTTATTGGTGTGGACATAACAGTGAAATTAACCCATGACTCAGAATGAGCA  
AAGGGAAGTTATTGATAAATCCAAGGTGGAAATGTAAATTTACTTATTGCTACTACTGTAG  
CTGAGGAAGGCCTAGACATCGAAGAATGTAACATCGTTATTGCTATGGCCTTGTCACCAA  
TGAAATTGCTATGGTGCAGGCTCGTGGTGCAGCTCGAGCTGATGAGAGCACCTATGCACT  
TGTGGCTTCAAGTGGCTCAGGAGCTGTTGAACGTGAAGATGTTAATATTTTCCGTGAGAAA  
ATGATGTATAAGGCCATTACGCGCGTCCAGAAGATGCCAAAGGAAGAGTATTTAAATAAGA  
TTCAGAATTTCCAGTTGCAAAGTATAGTGGAAAAACAAATGAAGGCAAAGAGAGATCAACG  
CAAGACATACAAGAAAAATCCTTCACTAATAACATTCTATGCAAAAATTGCCACAAGCTGA  
TATGTTCTGGAGAAGACATACAAGTTATTGAAAACATGCATCATGTCAAGTGTAAAAAAGAT  
TTCCAAAGTCTTTACCATACAAGAGAAAAATAAGACACTGCAAGATAAGCATGCCGATTACCA  
GACAAATGGGGAAATTATATGTAAAGATTGTGGACAAGCTTGGGGAAATATGATGGTTTAC  
CGAGGTCTTGACCTGCCATGTCTAAAGATTAGAAATTTTGTGGTTGTGTTTGAAGACAAGAA  
AACAACAAAGCAAATTTTAAAGAAATGGGGAGAACTGCCTGTCAGGTTCCCTAGTTTTGATT  
ATGCAGCTCATTGTCTTCAAGTGATGAAGATTAA

>chungaburmeisteri-mda5

ATGGCAGACGGGTCCCGGGACGAGCGCTTCTCTACATGATCTCCTGCTTCAGGCCGCG  
GCTGAAGCAGTTCATTCGGGTGCAGCCGGTGCTGGACCGGCTCCCCTCGCTGAGCGCGG  
GGGACAGGGAGAAGGTGCGGGCGGCTGCCCTGCAGCGCGGCGAGGTGGAGGGGGCGG

AGGAGCTGCTGCGGGCCGTGGAGCGGGGGCCCCGCGGGTGCGGCTGGTTCCACGAGTT  
CCTGCAGGCGCTGGAGCACGGTGGCTGCAGCCTGGCCGCTTGCTACGTGAACCCCAGCC  
TCAGCCATCTGCCCTCGCCGGCCGAGGAGGCCGACCACGACCTCTGCGTGCACTTGGTG  
TATCTGCTCCACAGCACACTGGTGGATAAAATGCAGACCACGCAGGTGGCCGAGAAGTGC  
CTGCAGATGGGCATCTTCCAGGACGAGGACTTGGATCGGATCCCACTGTTACTGACAAT  
CGTGGGAACAGAGATGGTGC AAGGGAGCTATTGAGCAGAATAGTGCAGAAGAAAGACTGG  
TTCTCTCCTTTTTT GATTGCTCTGCGTGAAACCCAACATGGAGACCTTGCAAGATGATTTAAG  
CGGAAATACAGGAGGAGCAGAGAATAGACCAAATGAGATGAAGAACAGTAGAAATGAAGA  
AACAGAAGTTACAAGCCAACCAGGATATGCTGTATTGGAGGATCTGAATCAGCAAGAAAAT  
ACGAATGATAGTTTCAGCAGTGAGAACAGTGTATTGGAAACATCTATTGGAAAGAATTCTGT  
AGTTTCAGAGTCAGATGTCTCCATAGGAGATGAAAGTGTCAGTAACTTGAATGAAAACCTG  
ACACAGAGCTGCACAACCAGTGATTCCGATGAAGATGAAGTGGAGAACAGAGCTTCACCT  
GAGCCAGATCTGATCCTGAGAGATTACCAGATGGAAGTTGCAAAGCCAGCACTGAATGGG  
GAGAATATTATAATATGTCTCCCTACAGGCAGTGGTAAAACCAGAGTGGCTGTTTACATTAC  
CAAAGATCACTTGGATAAGAAGAAAAGAGCATCAGAGCCTGGAAAAGTTATAGTACTTGTT  
AATAAGGTACCATTGGTAGAACAGCATTTACGAAAGGAGTTTAATCCATTCCCTGAAGCGTTG  
GTATCAAGTTATTGGTTTAAGTGGTGATTCTCAGCTGAAAATCTCATTTCCCTGAAGTTGTCA  
GACGGAATGATGTCATCATCAGTACAGCACAGATTCTTGAGAATTCAGTGTTAAATGCAGC  
CAAAGAAGATGAAGAAGGTGTCCACTTATCAGATTTTTCTACTCATCATTATCGATGAGTGT  
ATCACACTCAAAGGAAGGTGTCTACAACAATATAATGCGACGTTATTTAAAAGAAAAGATG  
AAGAACAGGAAGCTGGCAAAGAAAATAAACCCTGATCCACAGCCTCAGATTCTGGGAC  
TTACAGCCTCACCTGGTGTAGGAGGTGCAACATCCTACTCAAAGCTGAAGAACACATTCT  
GAAAATCTGCGCCAATCTTGATGCATGTAGGATCATGACTGTTGAAGAGCATGCCTCTCAA  
TTGAAGAATCAGGTGAAGGAACCATATAAGAAGACTGTGATTGCAGATGACAAAAGGAAGG  
ATCCATTTAGAGAGAGAATTACTGAGATCATGACAGACATTCAGAACTATTGCCAGCTCCAT  
CCAAAATCTGAGTTTGGAAGTCAAGCATATGAACAGTGGGTGATTAGAGAGGAGAGAAGA  
GCTGCAAAGAAAGAAAACGTAAGGAACGTGTCTGTGCAGAACACTTGAAGAAATACAATG  
ATGCTCTCCAGATAAATGACACCATCCGAATGGTGGATGCATACAATCACCTAAATACTTT  
TATAAGGAGGAGAAAAGTAAGAAGACAGTAAGGAGTGATGATGATGATGATGATGATGAAC  
CGGCAGTATCAAACAGGATGAAACAGATGAATTTCTAATAAATTTATTTAATTCAAAAAGA  
GACAGCTGAAAGAGTTGGCTAGAAAGCCAGAATATGAAAATGAGAAGCTAATACAGTTGCG  
AAACACTTTAATGGAGGAGTTCACGAAGACTGAGGAACCTAGAGGAATTATTTTCACAAAG  
ACTCGGCTAAGTGCCTTTGCTCTGTTCCAGTGGATTAAGGATAACCCAAAATTTGAAGAAG  
TGGGAATTAAGGCCATTATCTTATCGGTGCTGGACATAACAGTGAATTAACCCATGACT  
CAGAATGAGCAAAGGGAAGTTATTGATAAATTCGAGGTGGAATATAAATTTACTTATTGC  
TACTACTGTAGCTGAGGAAGGCCTAGACATCAAAGAATGTAACATCGTTATTCGCTATGGC  
CTCGTCACCAATGAAATTGCTATGGTGCAGGCTCGCGGTGAGCTCGAGCTGATGAAAGC  
ACCTATGCACTTGTGGCTTCAAGTGCCTCAGGAGCTGTTGAACGTGAAGATGTTAATATTTT  
CCGTGAGAAAATGATGTATAAGGCCATTCAGCGTGTCCAGAAGATGCCACAGGAAGAGTAT  
TTAAATAAGATTCAGAATTTCCAGTTGCAAAGTATAGTGGAAAAACAAATGAAGGCAAAGAG  
AGATCAGCACAAAGACATACAAGAAAAATCCTTCACTAATAACATTCCTATGCAAAAATTGCC  
ACAAGCTGATATGTTCTGGAGAAGACATACAAGTTATTGAAAACATGCATCATGTCAGTGTG  
AAAAAAGATTTCAAAGTCTTTACCATACAAGAGAAAATAAGACACTGCAAGATAAACATGC  
CGATTACCAGATAAATGGGGAAATTATATGTAAAGATTGTGGACAAGCTTGGGGAAATATG

ATGGTTCACCGAGGTCTTGACCTGCCTTGTCTAAAGATTAGAAATTTTGTGGTTGTGTTTGA  
AGACAAGAAAACAACAAAGCAAATTTTTAAGAAATGGGGAGAACTGCCTGTCAGGTTCCCT  
AGTTTTGATTATGCAGCTCATTGTCCTTCAAGTGATGAAGATTAA

>cicinnurus\_regius-mda5

ATGGCAGACAGCACCCGGGACGAGCTGTTCTGTACATCATCTCCTGCTTCAGGCCGCGG  
CTGAGGCAGTGGATCCAGGTGCAGCCCGTGCTGGACCGGCTCCCCTCGCTGAGCGCGGA  
GGACAAGGAGAGGGTGCGTGC GGCCGCCCTGCAGCGGGGCCAGGCGGCGGGGGCGGA  
GGAGCTGCTGCGGGCCGTGGAGCGGGGGCCCCGCGGCTGCGGCTGGATCCGCGAGTTC  
CTGCAGGCGCTGGAGCACGGCGGCTGCAGCCTGGCCGCCTGCTACGCCAACCCAGCCT  
GAGCCAGCTGCCCTCGCCGGCAGAGGAGGCCGAGCACGACCTCTGCGTGCACCTGGTGC  
AGCTGCTCCACGGCACGCTGGTGGACAGGATGCGGACCGTGACGGTGGCCGAGAAGTGC  
CTGGAGATGGGCATCTTCCGGGACGAGGACATGGATCAGATCCAGACTGTTGCTGACAAT  
CGTGGGAACAGAGATGGTGCAGAGGAGCTACTGAGCAGAATAGTGAGAAGAAAGATTG  
GTTCTCTTCTTTTTTATTGCTCTCCGTGAACTCAACATGAAGACCTTGACAGATGATTTAA  
GCGGAAATACAGGAGGAACAGAGAATAAACAAAATGGGATGGAGAAGAGTACAAACAAAG  
AAGCAGAAGTTACAAGCCAACCAGGATACATCACAGCAGAGAATTTGAAACAGGAAGAAAA  
TGTGGATGATAGTTTCAGCAGTGAGAACAGTGTATTGAAACATCCACAGAAAAGAATTCT  
GTGGTGTGACAGTCAGATGTCTCCATAGGAGATGGAAGTGTGAGTAACCTTGAATGAAAACC  
TGGGACAGAGCTGCACAACCAGTGATTCAGATGAAGGGGAGAGGAGAGCCTCACCTGAG  
CCAGATCTGACCCTGAGAGATTATCAGATGGAAGTTGCAAAGCCAGCACTGAATGGGGAG  
AATGTTATAATATGTCTCCCTACAGGCAGTGGTAAAACCAGAGTGGCTGTTTACATTACCAA  
AGATCACTTGGATAAGAAGAGAAGAGCATCAGAGCCTGGAAAAGTCATAGTACTTGTTAAT  
AAGGTGCCATTGGTAGAACAGCATTACAAACAGAGTTTAGTCCATTCCCTGAAGCGTTGGT  
ATCAGGTTATTGGTTTAAAGTGGTGAATCTCAGCTGAAAATCTCATTTCCCTGAAGTTGTCAGA  
AGAAATGATGTCATCATCAGTACAGCACAGATCCTTGAGAATTCAGTGTAAATGCATCCAA  
GGAAGATGAAGAAGGTGTCCACTTATCAGATTTTTCCCTCATCATTATCGATGAGTGTGATC  
ACACTCAAAAGGAAGGTGTCTACAACAATATAATGCGACGTTACTTAAAAGAAAAGATGAAG  
AACAGGAAGCTGGCAAAAGAAAACAAACCACAGATCCACAGCCTCAGATTCTGGGACTG  
ACAGCCTCACCTGGTGTAGGAGGTGCAACATCCTACTCAAAGCTGAGGAGCATATTCTGA  
AAATCTGTGCCAATCTTGATGCATGTAGAATTATGACTGTTGAAGAGCATGTCTCCAGCTA  
AAAAATCAGGTAAAGGAACCGTCTAAGAAGACTGTGATTGCAGATGACAAAAAAGGGATC  
CATTTAAAGAGAGAATTACTGAGATCATGACAGAAATACAAAATTATTGCCAGTTGCATCCA  
AAATCTGAGTTTGGAAGCTCAGACATATGAACAGTGGGTGATCAGAGAAGAGAAAAGAGCTG  
CAAAAGAAGAAAAACGCAGGGAACGTGTCTGTGCAGAACACTTGAAGAAATACAATGATGC  
TCTCCAGATAAATGACACCATCCGAATGGTGGATGCCTACAATCACCTAAATAACTTTTATA  
AAGAGGAGAAAAGTAAGAAAACAGTAAGGAGTGATGATGATGATGATGATGAACCAGCAGT  
ATCAAAACAGGATGAAACAGATGAATTTCTAATAGGTTTATTTATGCAAAAAAGAAACAGC  
TGAAAGAGTTGACGGGAAAGCCAGAAAATGAAAATGAGAAGCTAATAAAGTTGAGAAATAC  
TTAATGGAGGAGTTACAAAGACTGAGGAACCTCGAGGAATTATTTTACAAAGACTCGT  
CTAAGTGCCCTTTGCTCTATTCCAGTGGATTAAGGACAACCCGAAATTTGAAGAAGTGGGAA  
TTAGGGCCCATTTATCTTATCGGCTCTGGACATAACAGTGAGATGAAGCCCATGACTCAGAA  
TGAGCAAAGGGAAGTTATTGATAAATTCGACGTGGAAATGTAAATTTACTAATTGCTACTA  
CCGTAGCTGAGGAAGGCCTGGACATCAAAGAGTGTAACATTGTTATTCGCTATGGCCTTGT  
CACCAATGAAATTGCTATGCTGCAGGCTCGTGGTGCAGCTCGAGCTGATGAAAGCACCTAT

GCTCTTGTGGCTTCAAGTGGCTCAGGGGCTGTTGAACGTGAAGATGTTAATATTTTTCTGTG  
AGAAAATGATGTATAAGGCCATTACGCGTGTCCAGAAGATGCCACAGGAAGAGTATTTAAA  
CAAGATTCAGAGCTTCCAGTTGCAAAGTATAGTGGAAAAGCAAATGAAGGCAAAGAGAGAT  
CAGCGCAAGACATACAAGAAAAATCCTTCACTAATAAAATTCTTATGCAAACTTGCTACAA  
GCCGGTATGTTCTGGAGAAGACATACAAGTTATTGAAGACATGCATCATGTCAGTGTGAGA  
AAAGATTTCCAAAGTCTTTATCAAACAAGAGAAAATAAACTCTGCAAGATAAGCGTGCTGA  
TTACCAGACCAATGGGGAAATTATATGTAAACATTGTGGACAAGCTTGGGGAAATATGATG  
GTACACCGAGGTCTTGACCTGCCTTGTCTAAAGATTAGAAATTTTGTGGTTGTGTTTGCAGA  
CAAGAAAACAACAAAGCAAATTTTTAAGAAATGGGGAGAACTGCCCATCAGGTTTCCTGGT  
TTTGATTATGCAGCTCATTGTCCTTCAAGTGATGAAGATTAA

>colinus\_virginianus-md5

ATGTCCGAGGAGTGCCGAGACGAGCGCTTCCTCTACATGATCTCCTGTTTCAGGCAGCGG  
CTGAAGCGCTGCATCCGAGTGCAGCCGGTGCTGGACTGGCTGCCCTCGCTGAGCGCGGA  
GGAGAAGGAGAGGGTGCGTGCTGCGGCACAGCAGCGCGGCGAGGTGGAGGGGGCCGA  
GGAGCTGCTGCGCGCTGTGGAGCGCGGCCCCCGCGGCTCCGGCTGGTTCCCCGAGTTC  
CTGCTGGCGCTGAAGAAAGGCGGCTGCGACCTGGCCGCTTGCTACGTGAACCCTAGCCA  
GCTGCCCTCGCCCCGGGAGGAGGCCGACCACGATCTGTGCGTGCACCTGGTGCAGCTGT  
TGCACGGCACGCTGGTGGATAACATGCAGACCAGGCAGGTGGCCGAGAAGTGCCTGCAG  
CTGGGCATCTTCCAGGAGGAGGACATGGTTCGGATTGATGCTGTTACTGACAGTCGTGGG  
AACAGAGAAGGTGCAAGGGAGCTGTTGAGTAGGATAGTGCAGAAGAAGGATTGGTTCTCT  
CAGTTTCTGGTTGCTCTGCGTGAACTCAACATGAAAGCCTTGCAGATGATTTAAGTGGAA  
ATACAGGAGGAATAGAGAATAAAGAAGATGACTTGAAGGACAGAACAAGCAAAGAAATGGA  
AGCTGCAAGCCAACCAGGACGTGCTGCAAAGGAGGATTTGAAGCAGCAAGAAAATTTGGA  
TGATAGTTTTGTGTCAGGGAGAGCAGTGTATTGGAACATCTGTTGGAAGAAGTCTGTAGTTT  
CAGAATCAGTTATCGCTGAAGGAGATACAAGTGTGAGTTACTTGAATGAAAGCCTGGGACA  
CAGCAGCACAACCAGTGATTGAGGTGAAGATGAAGCAGAGAGCAGAGCTTCACCTGAGCC  
AGATCTCATCCTGAGAGATTATCAGATGGAAGTTGCAGAACCAGCGCTCAATGGGGAGAAT  
ATTATAATATGTCTCCCTACAGGCAGTGGCAAACAGAGTGGCTGTTTACATTACCAAAGA  
TCACTTGGATAAAAAGAAAATAGCATCAGAGTCAGGAAAAGTTATAGTACTTGTTAATAAGG  
TACCGTTAGTGAACAGCATTTACGAAGGGAGTTTAATCCATTCTGAAACGCTGGTACCG  
GGTTATTGGTTTAAGTGGTGATTCTGAGCTGAAAATTTCAATTCCTGAAGTTGTCAGAAGAA  
ATGATGTCATCATCTGTACTGCACAGATCCTGGAGAATTCAGTGTAAATGCAACTGAAGAC  
GATGAAGGTGTCTACTTGTGAGATTTTTCACTCATGATTATTGATGAATGCCATCACACTCA  
AAAGGAAGGTGTTTACAACAACATAATGAGACGTTATTTGAAAGACAAGATCAAGAACAGAA  
AGCTGGCAAAAAGAAAACAAACCTTTGATCCCACAGCCTCAGATTCTGGGACTTACAGCCTC  
ACCTGGAGTTGGTGGTGCAAGAACCTACTCAAAGCTGAAGAACATATTCTGAAGATTTGT  
GCCAATCTTGATGCATGCAAAATCATGACTGTTATAAAGCATGCCTCCCAGCTGAAGGATC  
TGGTGAAGGAGCCATTTAAGAAGACTGTGATTGCAGATGACAAAAGAAAGGATCCATTTAG  
AGAAAGAATTATTGAGATCATGAAAGAGATTGAAAAATATTGCCAGCTCTATCCAAAATCTG  
AGTTTGGCTCTCAACCATACGAACAGTGGGTGATTTCGGGAAGAGAAGAAAGCTGCAAAAG  
AAGAAAAACGCAAGGAGCGTGTCTGTGCAGAACACTTGAAGAAATATAATGATGCTCTGCA  
AATTAATGATACCATTCGTATGGTTGATGCGTACAATCACCTAAATAACTTTTATAAGGAGCT  
GAAAAGGAAGAAGACAGTAGGGAGTGATGACGATGAAGAACCAATAGTATCAAAACAGGA  
TGAAACAGATGAATTTCTATTAGGTTTATTTTCATGCAAAAAAGAAACAGCTGAAAGAGTTGA

CTAGAAAGCCAGAATATGACAATGAGAACTAATGAAGCTGCGAAACACTTTAATGGAAGA  
GTTACAAAGACTGAAGAATCTAGAGGAATTATTTTCACAAAGACTCGGCAAAGTGCCTTA  
GCTCTATACCACTGGATTATGGATAACCCAAAATTTGAAGAAGTGGGAATCAAAGCTCATTA  
TCTTATTGGTGGTGGACACAATAGTGAACTAAACCTATGACTCAGAATGAGCAAAGGGAA  
GTCATTGATAAATTCGAGTTGGAAGTATAAATTTACTTATTGCTACTACTGTAGCTGAGGA  
AGGCCTAGACATTAAAGAGTGTAACATTGTTATTCGCTATGGTCTGGTCACCAATGAAATTG  
CTATGGTGCAGGCTCGTGGTTCGAGCTCGAGCTGATGAAAGCACTTACGCACTTGTGGCTT  
CAAGTGGCTCAGGAGCTGTGGAGCGCGAAGATGTGAATGTTTTCCGTGAAAATATGATGTA  
TAAGGCCATTCAACGTGTCCAGAGGATGCCACCAGAAGAATATTTAAATAAGATTCAGGAC  
TTCCAGTTGCAAAGTGTAGTGAAAACTAATGAAGGCAAAGAGAGATCAACATAAAATATA  
TAAGAAGAACCCTTCACTAATAACATTCCTATGTAAGAATTGTACAAGCTGATATGTTCTG  
GAGAGGACATACAAGTAATTGAAAGTATGCATCATGTCAGTGTAAAAAAGATTTCCAACAT  
CTTTACCATAAAAGAGAAAATAGGACACTGCAAGATAAGCATGATGATCACCAGACAAATGT  
GGAAATTATATGTAAAGATTGTGGACAAGCTTGGGGAAATATGATGGTTTATCGAGGTCTT  
GATCTGCCTTGTCTAAAAATTAGAAATTTCTGTTGCTTTTGAAGACAAGAAAAACAAAAA  
GGATATTGTCAAGAAATGGGGAGAACTGCCCCGTCAGGTTTCCTGACTTTAATTATGCAGCT  
CATTGTCTTCAAGTGATGAAGATTAA

>colius\_striatus-mds5\_partial

NNCTACATGAACCCCAGCCTCAGCCAGCTGCCCTCGCCCGCCGAGGAAGCCGACCACGA  
CCTCTGCGTGCCTTGGTGCAGCTGCTCCACAGAACATTGGTAGAGAGAATGCGGGCCGT  
GCAGGTGGCCGAGAAGTGCCTGCAGATGGACATCCTCCAGGACGAGGACCTGGATCGGA  
TCCACACTGTTACAGACCATCGTGGGAACAGAGAAGGTGCGCGGGAGCTCTTGAGCAGAA  
TAGTGCAGAAGAAAGATTGGTTCTCTCTTTTTTGGTTGCTCTACGTGAAACCCAACATGGA  
CACCTTGCAGATGATTTAAGCGGAAATACAGGAGGAACAGAAAATAGAGAAGATGTGATAA  
AGAGCAGTACAAATAAAGAAACAGAAGGTACAACCCAACCTGGATATACCACAGCAGAGGA  
TTTGAAACAGCAAGAAAATGTGAATGACAGTTTCAGCAGTGAGAACAGTATATTGAAACAA  
CTATTCAAATAATTCTGCAGTTTCAGAGTCAGATATCTCCATAAGAGATGGAAGTGTCAAT  
AATGTTAATAAAAACCTGGGACAAAGTTGCTGCACAACCAGTGATTCAGATGAAGATGAAG  
TGGAGAGCAGAGCTTCACCTGAGCCAGATCTGATCCTGAGAGATTACCAGATGGAAGTTG  
CAAAACCAGCACTGAATGGAGAGAATATTATAATATGTCTCCCTACCGGCAGTGGTAAAC  
CAGAGTGGCTGTTTACATTACCAAAGATCATTTGGATAAGAAGAAAATAGCTTCAGAGACTG  
GAAAAGTTATAGTACTTGTTAATAAGGTACCGTTGGTAGAACAGCATTTACGGAAGGAGTTT  
AATCCATTCCTGAAGCGTTGGTATCAGGTTACTGGTTTAAGTGGCGATTCTCAGCTGAAAAT  
CTCGTTTTCTGAAGTTGTCAAGAGAAATGATGTCATCATCAGTACAGCACAGATCCTTGAG  
AATTCAGTGTTAAATGCAGCCAAAGAAGATGAAGAAGGTGTACATTTATCAGATTTTTCTGCT  
CATCATTATCGATGAGTGTATCACACTCAAAAAGAAGGTGTCTACAACAATATAATGCGAC  
GTTACTTAAAAGAAAAGATGAAGAACAGGAAGCTGGCAAAAAGAAAACAAACCACTGATCCA  
GCAGCCTCAGATTCTGGGACTTACAGCCTCACCTGGTGTAGGAAGTGCAAGAAATTACTCA  
AAAGCTGAAGAACATATTCTGAAAATCTGTGCGAATCTTGATGCATGTAGAATCATGACTGT  
CATAGAGCATGCCTCTCAATTGAAGAATCAGGTGAAGGAACCATATAAGAAAACCTGTAATT  
GCAGATGACAAAAGAAAGGATCCATTTAGAGAGAAAATTACTGAGATCATGAGAGACATTC  
AAAATTATTGCCAACTCTGTCCAAAATCTGAGTTTGGAACTCAGCCATATGAACAGTGGGTG  
ATTAGAGAAGAAAAAAGCTGCAAAAAGAAACGCAAGGAACGTGTATGTGCAGAAC  
ACTTGAAGAAGTACAATGATGCTCTCCAGATAAATGACACCATCCGAATGGTGGATGCATA

TAATCACCTAAATAACTTTTTATAAGGAGGAGAAAAGTAAAAAGACAGTAAGGAGTGATGATG  
ATGATGATGGTGATGAACCAGCAGTCTCAAAGCAGGATGAAACAGATGAATTTCTTATAGG  
TTTATTTTCATGCAAAAAAGAAACAGCTGAAAGAGTTGGCTAGAAATCCAGAATATGAAAATG  
AGAACCTAATAAAGTTGCGAAACACTTTAATGGAGGAGTTCACGAAGACTAAGGAACCTAG  
AGGAATTATTTTCACCAAGACTCGGCTAAGTGCCTGTGCTCTATTCCAGTGGAATTAAGGAC  
AACCCAAAATTTGCAGAAGTGGAATTAAGGCCATTATCTTATCGGTGCTGGACATAACA  
GTGAAGTTAAACCCATGACTCAGAATGAGCAAAGAGAAATTATTGATAAATTCGAGGTGG  
AAATGTAAATTTACTTATTGCTACTACTGTAGCTGAAGAAGGCCTAGACATCAAAGAGTGTA  
ACATCGTTATCCGCTATGGCCTTGTCACCAATGAAATTGCTATGGTGCAGGCTCGTGGTCG  
GGCTCGAGCTGATGAGAGCACCTATGCCCTAGTGGCTTCAAGTGGCTCAGGAGCTGTTGA  
ACGTGAAGATGTTAATGTTTTCCGTGAGCAAATGATGTATAAGGCCATTCAGCGTGTCCAA  
AAGATGCCACAGGAAGAGTATTTAAAGAAGATTCACAATTTCCAGTTGCAAAGTATAATGGA  
AAAACAAATGAAGACAAAGAGAGATCAGTGCAAGGCATACAAGAAAAATCCTTCACTAATAA  
ATTTCTATGCAAAAATTGCCACAAGCTGGTATGTTCTGGAGAAGACATACAAGTTATTGAG  
AACATGCATCATGTGAGTGTAAGGATTTCCAAAATCTTACCATACAAGAGCAAATAA  
GACATTGCAAGATAAGAATGATGATCACCAGATAAATGGGGAAATTATATGTAAAGAATGTG  
GACAAGCTTGGGGAAATATGATGGTTCACCAAGGTCTTGATCTGCCTTGTCTGAAGATTAA  
AAATTTTGTGGTTGTGTTTGAACACAAGAAAACAAGAAAGGATATTTTTAAGAAATGGGGAG  
ATTTGCCCATCAAGTTCCTAGTTTGATTATGCAGCTCATTGTCCTTCAAGCGATGAAGAT  
TAA

>columba\_livia-mda5

ATGGGAGAAGAGTCCCGAGACGAACGCTTCCTCTACATGATCTCCTGCTTCAGGCCGCGG  
CTGAAGCAGTTCATCCGGGTGGAGCCGGTGCTGGACCGGCTTCCTTGCTGAGCGCGGA  
GGACAGGGAGAAGGTGCGGGCGGCCGCCCGGCAGCGGGGCGAGGTGGAGGGGGCGGA  
GGAGCTGCTGCGGGCCGTGGAGCGGGGACCCCGCGGGTGCGGCTGGTTCCACGAGTTC  
CTGCAGGCGCTGGAGCACAGTGGCTGCAGCCTGGCTGCCTGCTACGTGAACCCAGCCT  
CAGCCAGCTGCCATCGCCAGCCGAGGAGGCCGACCATGACCTCTGCGTGCACTTGGTGC  
AGCTGCTCTACAGCACGCTGGTGGATAAAATGCAGACCGTGCAAGTGGCCGAGAAGTGCC  
TGCAGATGGGCATCTTCCAGGAGGAGGACCTCGATCAGATCCCACTGTTACTGACAATCA  
TGGGAACAGAGGTGGTGAAGGGAAGTACTGAGCAGAGTAGTGCAAGAAGGATTGGTT  
CTCTCCTTTTTTGATTGCTCTACGTGAAACCCGACATGGAGACCTTGCAAGATGATCTAAGTG  
GAAATACAGGAGGAACAGAGAATGGACAAAATGAGATGAAGAACAGTACAAATGAAGTAAG  
AGAAGTTATAAGCCCACCAGGATATGCCATTGTGGAGGATTTGAAACAGCAAGAAAATGTG  
AATGATAGTTTCAGCAGTGAGAACAGTGTACTGGAACATCTACTAGAAGGAATTCTGTAGT  
TTCTGAGTCAGATGTCTCCATAGGAGATGGAAGTGTGAGTAAGTGAAGAAAAGTGGGA  
CACAGCTGCACAACCAGTGATTCAGATGAAGGTGAAATGGAAAGCAGATCTTACCTGAGC  
CAGATCTGATCCTGAGAGATTACCAGATGGAAGTTGCAAAGCCAGCACTGAATGGGGAGA  
ATATTATAATATGTCTCCCTACAGGCAGTGGTAAAACCAGAGTGGCTGTTTACATTACTAAA  
GATCACTTGGATAAGAAGAAAAGAGCATCGGAGCCTGGAAAAGTTATAGTACTTGTTAATA  
AGGTACCATTGGTAGAACAACATTTACGAAAGGAGTTTAAATCCATTCTGAAGCGTTGGTAT  
CGGGTTATTGGTTTAAAGTGGCGATTCTCAGCTGAAAATCTCATTTCTGAAGTTGTCAGAAG  
AAATGATGTCATCATCAGTACAGCACAGATCCTTGAGAATTCAGTGTAGATGCAGCCAAG  
GAAGATGAAGAAGGTGTCCACTTATCAGATTTTTCACTCATCATTATTGATGAATGTCATCA  
CACTCAGAAGGAAGGTGTCTACAATAATATAATGCGACGTTACTTAAAAGAAAAGATGAAGA



ACAGGAAGCTAGCAAAAGAAAACAAACCACTGATCCCACAGCCTCAGATTCTGGGACTTAC  
AGCCTCACCTGGTGTAGGAGGTGCAACATCCAACCTCAAAAGCTGAAGAACATATTCTGAAA  
ATCTGTGCCAATCTCGATGCGTGTAGAATCATGACTGTTGAAGAGCATGCCTCCCAATTGA  
AGAATCAAGTGAAGGAACCATATAAGAAGACTGTGATTGCAGATGACAAAAGAAGGGATCC  
ATTTAGAGAGAGAATTACTGAGATCATGACTGATATTCAAAACTATTGCCAGCTTCATCCAA  
AATCTGAGTTTGGAACCTCAGCCATATGAACAGTGGGTGATTAGAGAAGAGAAAAAAGCTGC  
AAAAGAAGAAAAACGCAAGGAACGTGTCTGTGCGGAACACCTGAAGAAATATAACGATGCT  
CTCCAGATAAATGACACCATCCGAATGGTGGATGCGTACAATCACCTAAAGAACTTTTATAA  
GGAGGAGAAAAAGTAAGAAGACAGTAAGGAATGATGATGATGACGATGATGATGAACCAGC  
AGTATCAAAACAGGATGAAACAGATGAATTTCTAATAGGTTTATTTTCATGCAAAAAAGAAGC  
AGCTGAAAGAGTTGGCTAGAAAGCCAGAATATGAAAATGAGAAGCTAATACAGTTGCGAAA  
CACTTTAATGGAGGAGTTCACAAAGACCGAGGAACCTAGAGGAATTATTTTCACGAAGACT  
CGGCTCAGTGCCTTTGCTCTGTTCCAGTGGATTAAGGATAACCCAAAATTTGAAGAAGTGG  
GAATTAAGGCCATTATCTTATTGGTGCTGGACATAACAGTGAAATGAAACCCATGACTCA  
GAATGAGCAAAGGGAAGTTATTGATAAATTCCGAGGTGGTAATGTAAATTTACTTATTGCTA  
CTACTGTAGCTGAGGAAGGCCTAGACATCAAAGAATGTAAACATCGTTATTGCTATGGCCT  
CGTCACCAATGAAATTGCCATGGTGCAGGCTCGTGGTCGAGCTCGTGCTGATGAGAGCAC  
CTATGCACTTGTGGCTTCAAGTGGCTCAGGAGCCGTTGAACGTGAAGATGTTAATATTTTC  
CGTGAGAAAATGATGTATAAGGCCATTCAACGTGTCCAGAAGATGCCGCGGGAAGAGTATT  
TAAATAAGATTCAAGATTTCCAGTTGCAAAGTATAGTGGAIAAAAAAAAAATGAAGACAAAGAGA  
GATCAGTGCAAGACATACAAGAAAAATCCTTCACTAATAACATTCCTGTGCAAAAATTGCTA  
CAAGCTGATATGTTCTGGAGAAGACATACAAGTTATTGGAAACATGCATCATGTGAGTGTA  
AAAAAGATTTCCAAAGTCTTTACCATACAAGAGAAAAATAAGACACTGCAAGATAAGCATGCT  
GATTACCAGACAAATGGGGAAATTATATGTAAAGACTGTGGACAAGCTTGGGGAAACATGA  
TGGTTACAGAGGTCTTGACCTGCCTTGTCTAAAATTAGAAATTTTGTGGTTGTGTTTGAA  
GACAAGAAAAACAACAAAGCAAATTTTTAAGAAATGGGGAGAACTGCCCATTAGGTTCCCTA  
ATTTTGATTATGCAGCTCATTGCCCTTCAAGTGATGAAGATTAG

>corapipo\_altera-md5

ATGGAAGAGGGAGACCGGGACGAGAGGTTTCTCTACATGATCTCCTGCTTCAGGCTGCGG  
CTGAAGCAGTTCATCCAGGTGCAGCCCGTGCTGGACCAGCTCCCTTCGCTGAGCGCGGA  
GGAGAGGGGAGAAGGTGCGGGGCGGCCCTCCTGCAGGGGGGCGAGGTGGCGGGGGCCGA  
GGAGCTGCTGCGGGCCGTGGAGCGGGGACCCCGCGGCTGCGGCTGGTTCCACGAATTT  
CTGCAGGCACTAGAGCACGGCGGCTGTAGCCTGGCCGCCTGCTACGCCAACCCAGCCT  
CAGCCAGCTGCCCTCGCCGGCCGAAGAGGCTGACCACGACCTCTGCGTGACCTGGTGC  
AGCTGCTCTACAGCACGCTGGTGGACAGGATGCGGGCCGTGCAGGTGGCCGAGAAGTGC  
CTGGAAATGGGCATCTTCAAGGAGGAGGACCTGGAGCGGATCCAGACTGTTACTGACAAT  
CGTGGGAACAGAGAGGGTGCAAGGGAGCTTCTGAGCAGAATAATGCAGAAGAAAGACTG  
GTTCTCTCCTTTTTTAATTGCTCTCCGTGAAACCCAACATGGAGACCTGGCAGATGATTTAA  
GTGGAAATACAGGAGGAACAGAGAATAGACAAAATGAGATGAAGAACAGTACAAATGAAGA  
AACAGAAATTACAAGCCAACCAGGATATGCCACAGTGGAGGACCTGAAACAGCAAGAAAAT  
GTGAATGATAGTTTCATCAGTGAGAACAGTGTATTGGAAACATCCATGGGAGAGAATTCTG  
TAGATTACAGATCAGATGTCTCCATAGGAGATGGAAGTGTCTGTAACCTCAGTGAAAACCT  
GGGCCAGAGCTGCACAACCAGCAATTCAGATGAAGAGGAGAGGAGAGCTTCACCTGAGC  
CAGATCTGACCCTGAGAGATTACCAGATGGAAGTTGCAAAGCCAGCACTGAATGGGGAGA

ATATTATAATATGTCTCCCTACAGGCACTGGTAAAACCAGAGTGGCTGTTTACATTACCAAA  
GATCACTTGGATAAGAAGAAAAGAGCATCAGAGCCTGGAAAAGTCATAGTACTTGTTAATA  
AGGTACCACTGGTACAACAGCATTTAGAATCAGAGTTTCATCCATTCTGAAGCGTTGGTAT  
CAGGTTATTGGTTTAAGTGGTGATTGTCAACTGAAAATCTCATTTTCCTGAAGTTGTCAGAAG  
AAATGATGTCATCATCAGTACAGCACAAATCCTTGAGAATTCATAATAATGCAGACAAAG  
AAGATGAAGAAGGTGTCCACTTATCAGATTTTTCCCTTATCATTATTGATGAGTGTATCAC  
ACGCAGAAGGAAGGTGTCTACAACAATATAATGCGACGTTACTTAAAAGAAAAGATGAAGA  
ACAGGAAGCTGGCAAAGAAAACAAACCACTGATCCCACAGCCTCAGATTCTGGGACTTAC  
AGCCTCACCTGGTGTAGGAGGCGCAAGATCCTACGCAAAGCTGAAGACCATATTCTGAA  
AATCTGTGCCAATCTTGATGCATGTAGAATTATGACTGTTGAAGAGCATGAGGACCAGCTA  
AAGAATCAGGTGAAGGAACCATCCAAGAAGACTGTGGTTGCAAATGACAAAAAAGGGATC  
CATTTAGAGAGAAAATTACTGAGATCATGAAAGAAATACAAAACCTATTGCCAGCTCCATCCA  
AAATCCGAGTTTGGAACTCAGACATATGAACAGTGGGTGATCAGAGAAGAGAGAAGAGCT  
GCAAAGAAGAAAAGCGCAAGGAACGTGTCTGTGCAGAACACTTGAAGAAATACAATGATG  
CTCTCCTGATAAATGACAGTATCCGAATGGTGGATGCATACAATCACCTAAATAACTTTTAT  
AAGGAGGAGAAAAGTAAGAAGACAGTAAGGAGTGATGATGATGATGATGATGATGAACCA  
GCTGTATCAAAACAGGATGAAACAGATGAATTTCTAATAGGTTTATTTTCATGCAAAAAAGAA  
GTGGCTGAAAAAGTTGGCTGGAAAGCCAGAACATGAAAATGATAATCTAATAAAGTTGCGA  
AATACTCTAATGGAGGAGTTCACGAAGACTGAGGAACCCAGAGGAATTATTTTCACAAAGA  
CTCGTCTAAGTGCCCTTTGCTCTATTCCAGTGGATTCAAGACAACCCAAAATTTAAAGAAGTG  
GGAATTAAGGCCCATTTATCTTATCGGCTCTGGACATAACAGTGAAATGAAACGCATGACTC  
AGAATGAGCAAAGGGAAGTTATTGATAAATCCGATGTGGAAATGTAAATTTACTTATCGCT  
ACTACTGTAGCTGAGGAAGGCTTGGACATCAAAGAGTGTAACATCGTTATTAGCTATGGCC  
TTGTCACCAATGAAATTGCTATGGTGCAGGCTCGTGGTTCGAGCTCGAGCTGATGAAAGCA  
CCTATGCTCTTGTGGCTCCGAGTGGCTCAGGAGCTGTTGAACGTGAAGATGTTAATATTTT  
CCGTGAGAAAATGATGTATAAGGCCATTACGCGTGTCCAGAAGATGCCACAGGAAGAGTAT  
TTAAATAAGATTGAGAATTTCCAGTTGCAAAGTATAGTGGAAAAACAAATGAAGGCAAAGAA  
AGATCAGCGCAAGACATACAAGAAAAATCCTTCACTAATAACATTCTTATGCAAAAATTGCC  
ACAAAACGATATGTTCTGGAGAAGACATACAAGTTATTGAGTACATGCATCATGTCAGTGTG  
AAAAAAGATTTCCAAAGCCTTTATCATACAAGAGAAAATAAGACACTGCAAGATAAGCATGC  
CGATTACCAGACAAATGGGGAAATTATATGTAAAGATTGTGGACAAGCTTGGGGAAATATG  
ATGGTTCACCGAGGCCTTGACCTACCTTGTCTGAAGATTAGAAATTTTGTGGTTGTGTTTGC  
AGACAAGAAAACAACAAAGCAAATTTTTAAGAAATGGGGAGAACTGCCCGTCAGGTTTCCT  
AGTTTTGATTATGCAGCTCATTGTCTTCAAGTGATGAAGACTAA

>corvus\_moneduloides-md5

ATGGCAGACAGCACCCGGGACGAGCTGTTCTGTACATGATCTCCTGCTTCAGACCGCGG  
CTGAAGCAGTGCATCCAGGTGCAGCCCGTGCTGGACCGGCTCCCCTCGCTGAGCGCGGA  
GGACAGGGAGAGGGTGCGTGCGGCCGCCCTGCAGCGGGGCCAGGCGGCGGGGGCGGA  
GGAGCTGCTGCGGGCCGTGGAGCGGGGGCCCCGCGGCTGCGGCTGGATCCGCGAGTTC  
CTGCAGGCGCTGGAGCACGGCGGCTGCAGCCTGGCCGCTGCTACGCCAACCCAGCCT  
GAGCCAGCTGCCCTCGCCGGCAGAGGAGGCCGAGCACGACCTCTGCGTGACCTGGTGC  
AGCTGCTCCACGGCACGCTGGTGGACAGGATGCGGACCGTGACGGTGGCCGAGAAGTGC  
CTGGAGATGGGCATCTTCCAGGACGAGGACATGGATCGGATCCAGACAGTTGCTGACAA  
CGTGGGAACAGAGATGGCGCGAGGGAACCTACTGAGCAGAATAGTGCAGAAGAAAGATTG

GTTCTCTTCTTTTTTGGTTGCTCTCCGTGAAACTCAACATGAAGACCTTGCAGATGATTTAA  
GCGGAAATACAGGAGGAACAGAAAATAAACAAAATGGGATGGAGAAGAGTACAAACGAAG  
AAGCAGAAGTTACAAGCCAACCAGGATACCTCAGAGCAGATAATTTGAAACAGGAAGAAAA  
TGTGGATGATAGTTTCAGCAGTGAGAACAGTGTATTGAAACATCCATAGAAAAGAATTCT  
GTGGTGTGAGACTCAGATGTCTCCATAGGAGATGGAAATGTCAGTAACTTGAATGAAAACC  
TGGGACAGAGCTGCACAACCAGTGATTCAGATGAAGGGGAGAGGAGAGCCTCACCTGAG  
CCAGATCTGACCCTGAGAGATTACCAGATGGAAGTCGCAAAGCCAGCGCTGAATGGGGAG  
AATATTATAATATGTCTCCCTACGGGCAGTGGTAAAACCAGAGTGGCTGTTTACATTACCAA  
AGATCACTTGGATAAGAAGAGAAGAGCATCAGAGCCTGGAAAAGTCATAGTACTTGTTAAT  
AAGGTGCCATTGGTAGAACAGCATTTACAAACAGAGTTCAGCCCATTCTGAAGCGTTGGT  
ATCAGGTTATTGGTTTAAAGTGGTGATTCTCAGCTGAAAATCTCATTTCTGAAGTTGTCAGA  
AGAAATGATGTCATCATCAGTACAGCACAGATCCTTGAGAATTCAGTGTAAATGCATCCAA  
GGAAGATGAAGAAGGTGTCCACTTATCAGATTTTTCCCTCATCATTATCGATGAGTGCCATC  
ACACTCAAAGGAAGGTGTCTACAACAATATAATGCGACGTTACTTAAAAGAGAAGATGAA  
GAACAAAAAGCTGGCAAAAGAAAACAAACCACAGATCCCACAGCCTCAAATTCTGGGACTG  
ACAGCCTCACCTGGTGTAGGAGGTGCAACATCCTACTCAAAGCTGAAGAGCATATTCTGA  
AAATCTGTGCCAATCTTGATGCATGTAAAATTATGACTGTTGAAGAGCATGTCTTCCAACCTG  
AAGAATCAGGTAAAGGAGCCCTCTAAGAAGACTGTGATTGCAGATGACAAAAAAGGGGATC  
CATTTAAAGAGAGAATTACTGAGATAATGACAGAAATACAAAATTATTGCCAGTTGCATCCA  
AAATCTGAGTTTGGAACTCAGACATATGAACAGTGGGTGATCAGAGAAGAGAGAAGAGCTG  
CAAAAGAAGAAAAACGCAGGGAACGTGTCTGTGCAGAACACTTGAAGAAATACAATGATGC  
TCTCCAGATAAATGACACCATCCGAATGGTGGATGCCTATAATCACCTAAATAACTTCTATA  
AAGAGGAGAAAAAGTAAGAAGACAGTAAGGAGTGATGATGATGATGATGATGATGATGA  
TGAACCAGCAGTATCAAACAGGATGAAACAGATGAATTTCTAATGGGTTTATTTTCATGCAA  
AAAAGAATCAGCTGAAAGAGTTGACTAGACAGCCAGAAAATGAAAATGAGAAGCTAATAAA  
GTTGAGAAATACTCTAATGGAGGAGTTCACAAAGACTGAGGAACCTCGAGGAATTATTTTC  
ACAAAGACTCGTCTAAGTGCCTTTGCTCTATCCCAGTGGATTAAGGACAACCCAAAATTTGA  
AGAAGTGGGAATTAAGGCCATTATCTTATCGGCTCTGGTCATAACAGTGAGATGAAGCCC  
ATGACTCAGAATGAACAAAGGGAAGTTATTGATAAATTTTCGACGTGGAATGTAAATTTACT  
AATTGCTACTACTGTAGCTGAGGAAGGCCTGGACATCAAAGAGTGTAACATTGTTATTCGC  
TATGGCCTCGTCACCAATGAAATTGCTATGCTGCAGGCTCGTGGTCGAGCTCGAGCTGAT  
GAAAGCACCTATGCTCTTGTGGCTTCAAGTGGCTCAGGGGCTGTTGAACGTGAAGATGTTA  
ATATTTTTTCGTGAGAAAATGATGTATAAGGCCATTCAGCGTGTCCAGAAGATGCCACAGGA  
AGAGTATTTAAATAAGATTCAGAGTTACCAGTTGCAAAGTATAGTGGAAAAGCAAATGAAGG  
CAAAGAGAGATCAGCGCAAGACATACAAGAAAAATCCTTCACTGATAAAATTCTTATGCAAA  
ACTTGCTACAAGCCAGTATGTTCTGGAGAAGACATACAAGTTATTGAAGACATGCATCATGT  
CAGTGTGAGAAAAGATTTCCAAAGTCTTTATCATACAAGAGAAAATAGAACACTGCAAGATA  
AGCATGCTGATTACCAGACCAATGGGGAAATTATATGTAAACACTGTGGACAAGCTTGGGG  
AAATATGATGGTACACCGAGGTCTTGACCTGCCTTGCTAAAGATTAGAAATTTTGTGGTTG  
TGTTTGCAGACAAGAAAACAACAAAGCAAATTTTAAAGAAATGGGGAGAACTGCCCATCAG  
GTTTCCTGTTTTTATTATGCAGCTCATTGTCCTTCAAGTGATGAATATTAA

>cuculus\_canorus-md5

ATGGCGGAGCAGKGCCGGGACGAGCGCTTCCTCTACATGATCTCGTGCTTCAGGCCGCG  
GCTGAAGCAGTTCATCCGCGTGCAGCCGGTGCTGGMCCGCCTGCCGTGCTGGGCGCG

GAGGAGCGGGAGCGGGTGCGGGCGGCCGCCCTGCAGCGCGGCGAGGTGGCGGGCGCG  
GAGGAGCTGCTGCGGGCGGTGGAGCGCGGCCCCCGCGGCTGCGGCTGGTTCCACGAGT  
TCCTCCAGGCGCTGGAGCACGGCGGCKGCAGCCYGGCCGCCMGCTACGTGAACCCAG  
CCTCAGCCACCTGCCCTCGCCCGCCGAGGAGGCCGACCACGACCTCTGCGTGACCTGG  
TGCAGCTGCTCCACAGCACGCTGGTGGATAGAATGCGGGCSGTGCCGGTGGCCGAGAAG  
TGCCTGGAGTTGGGCGTCTTGCAAGACGAAGACCTGGATCGGATCCACACTGTTACTGAC  
AGTCGTGGGAACAGAGATGGTGAAGGGAGCTATTGAGCAGAATAGTGCAGAAGAAAGGT  
TGGTTTTCTCCTTTTTTATTGCTCTGCGTGAAACCCAAACATGGAGACCTTGCAGATGATTT  
AAGCGGAAATACAGGAGGAACAGAGAACAGACAAAATGGGATGAAGAAGAGTACAAACAA  
AGAAACAGAAGTTACCAGCCCACCAGGATATCCCCTAGTAGAGGATTTGGAACATCAAGAA  
AATGTGCATGATAGTTTCAGCAGTGAGAAGAGTGTATTGGAAACATCCATTAGAAAGAATTC  
TGTAAGATTCAGGCTCTGATGTCTCCATAGGAGATGGAAGTGTGAGTAACCTAAACGAAAAC  
CTGGGACAGAGCTGCACAACCTAGCGATTGAGATGAAGATGAAGTGGAGACCAGAGCTTCA  
CCTGAGCCGGCCTTGATTCTGAGAGATTACCAGATGGAAGTTGCAAAGCCAGCACTGAAT  
GGGGAGAACGTTATAATCTGTCTCCCTACAGGCAGTGGTAAAACCAGAGTGGCTGTTTACA  
TTACCAAAGATCACTTGGATAAGAAGAAAAGAGCATCAAAGCCTGGAAAAGTTATAGTACTT  
GTTAATAAGGTACCATTGGTAGAACAGCATTTACGAAAGGAGTTTAATCCATTCTGAAGCG  
TTGGTATGAGGTTACTGGTTTGAGTGGTGATTCTCAGCTGAAAATCTCATTTCTGAAGTTG  
TCAGAAGAAATGATGTCATCATCAGCACAGCACAGATCCTGGAGAATTCAGTGTAAACGC  
AGCTAAAGAAGATGAAGAAGGTGTCCACTTATCAGATTTTTCACTTATCATTATCGATGAGT  
GTCATCACACTCAAAGGAAGGCGTCTACAATAACATAATGCGACGTTACTTAAAGAAAA  
GATGAAGAACAGGAAGCTGGCAAAGAAAACAAACCACTGACTCCACAGCCTCAGATTCTT  
GGACTTACAGCCTCACCTGGTGTAGGAGGTGCAACAACCAACTCAAAGCTGTAGAACATA  
TTTTGAAAATCTGTGCCAATCTTGATGCATGTAGAATCATGACTGTTGAAGAGCATGCCTCC  
CAGCTGAAGAATCAGGTGAAGGAACCGTATAAGAAGACTGTTATTGCAGATGACAAAAGAA  
GGGATCCATTTAGAGAGAGAATTACAGAGATCATGGCAGACATTCAAACCTATTGTCAGCT  
CCATCCAAAATCTGAGTTTGGAACCTAGCCATATGAACAGTGGGTGATTAGAGAAGAGAGA  
AGAGCTGCAAAAAGAAAAACGCAAGGAACGTGTCTGCGCAGAACACCTGAAGAAATAT  
AATGATGCTCTCAAATAAATGACACCATCCGAATGGTGGATGCATACAATCATCTAAATAA  
CTTCTATAAGGAGGAGAAAAAGTAAGAAGACAGTAAGGAGTGATGATGATGATGATGAT  
AAACCAGCAGTATCAAACAGGATGAAACAGATGAATTTCTAATAGGTTTATTTTCATGCAAA  
AAAGAAACAGCTGAAAGAGTTGACTAAAAAGCCAGAATATGAAAATGAGAAGCTAATACAG  
TTGCGAAACACTTTAATGGAAGAGTTCACGAAGACTGAGGAACCCAGAGGAATTATTTTCA  
CAAAGACTCGGCTAAGTGCCTTTGCTCTGTTCCAGTGGATTAAGGATAACCCAAAATTTGA  
AGAAGTGGGAATTAAGGCCATTATCTTATTGGTGTGACATAACAGTGAAGTTAAGCCC  
ATGACTCAGAATGCGCAAAGGGAAGTTATTGATAAATTCCGAGGTGGAAATGTAAATTTACT  
TATTGCGACTCCTGTAGCTGAGGAAGGCCTAGACATCAAAGAGTGTAACATCGTTATTTGC  
TATGGCCACGTCACCAATGAAATTGCTATGGTGCAGGCTCGTGGTCGAGCTCGAGCTGAT  
GAGAGCACCTATGCACTTGTGGCTTCAAGAAGCTCAGGAGCTGTTGAACGTGATGATGTTA  
ATACTTTCCGTGAGAAAATGATGTATAAGGCCATTGAGCATGTCCAGAAGATGCCACAAGA  
AGAGTATTTACATAAGATTCAGAATTTCCAGTTGCAAAGTATAGTGGAAAAAAAATGAAGG  
TAAAGAGAGATCAGCGCAAGACATACAAGAAAAATCCTTCACTAATAACATTCTTATGCAAA  
AATTGCCACAAGCCAGTATGTTCTGGAGAAGACATACAAGTTATTGAGAACATGCATCATAT  
CACTGTGAAAAAAGATTTCAAAGTCTTTACCATACAAGAGAAAAATAAGACACTGCAAGAGA

ACCATGCTGATTACCAGACAAATGGGGAAATTAAGTGTAAAGATTGTGGACAAGCTTGGGG  
GAATATGATGGTTCACCGAGGTCTTGACCTGCCTTGCCTAAAGATTAAAAATTTGTGGTTG  
TGTTTGAAGGCAAGGAAACAACAAGGACATTTTTAAGAAATGGGGAGAACTGTCTGTCAG  
GTTCCCTGATTTTAATTATGCAGCTCATTGTCCTTCAAGTGATGAAGATTAA

>cyanoderma\_ruficeps-md5

ATGGCAGAGAGCACCCGGGACGAGCGGTTTCCTGTACATAGTCTCCTGCTTCAGGCCGCG  
GCTGAGGCAGTTCATCCAGGTGCAGCCCGTGCTGGACCGGCTGCCGTGCTGAGCGCGG  
AGGACAGGGACAGGGTGCCTGCGGCCGCCAGCAGCGGGGCGCGATGGCGGGCGCGG  
AGGAGCTGCTGCGAGCCGTGGAGCGGGGGCCCCGCGGCTGCGGCTGGATCCGCGAGTT  
CCTGCAGGCGCTGGAGCACGGTGGCTGCAGCCTGGCCGCCTGCTACGCCAGCCCCAGC  
CTGAGCCAGCTGCCCTCGCCGGCACAGGAGGCCGAGCACGACCTGTGCGTGCACCTGGT  
GCAGCTGCTGCACGGAACGCTGGTGGACAGGATGCGCACCGTGCCGGTGGCCGAGAAGT  
GCCTGGAGATGGGACTCTTCCAGGACGATGACATGGATCGGATCCAGGCTGTTACTGACA  
ATCATGGAAACAGAGATGGTGCAAGGGAGCTACTGAGCAGAATAGTCCAGAAGAAAGATT  
GGTTCTCTTCTTTTTTGGTTGCTCTCCGTGAAACCCAACATGAAGACCTTGCAGATGATTTA  
AGTGGAATACAGGAGAGAATAAACAAAATGGGATGGAGCAGACTACAAACAAGAGACA  
GAAGTTACAAGCCAACCTGGACATGTCATGGAGGAGAATTTGAAACAGGAAAAAATGCGG  
ATGATAGTTTCAGCAGTGAGAACAGTGTGTTGAAACATCCACAGAGAAGAGTTCTATGGT  
GTCAGAGTCAGATGTCTCCATAGGAGATGGAAGTGTGAGTAACTTGAATGAAGACCTGGGA  
CAGAGCTGCACAACCAAGTGAATCAGATGAAGTGGAGAGGAGAGCCTCACCTCAGCCAGAT  
CTGACCCTGAGAGATTACCAGATGGAAGTTGCCAAGCCAGCACTGAATGGGGAGAATATT  
ATAATATGTCTCCCTACGGGCAGTGGTAAAACCAGAGTGGCTGTTTACGTTACCAAAGATC  
ACTTGGATAAGAAGAGAAGAGCATCAGAGCCTGGAAAAGTCGTAGTACTTGTTAATAAGGT  
TCCATTGGTAGAACAGCATTTACAAACAGAGTTCAGTCCATTTCCTGAAGCGTTGGTATCAG  
GTTATTGGTTTAAGTGGTGATTCTCAGCTGAAAATCTCATTTCTGAAGTTGTCAGAAAAA  
TGATGTCATCATCTGTACAGCACAGATCCTTGAGAATTCAGTGTAAATGCATCCAAGGAAG  
AAGAGGAAGGTGTCCACTTATCAGATTTTTCCCTCATCATTATTGATGAGTGTATCACACT  
CAAAAGGAATGTGTCTACAACAATATAATGCGACGTTACTTAAAAGAAAAGATGAAGAACAG  
GAAGCTGGCAAAAGAAAACAACCACTGATCCACAGCCTCAGATTCTGGGACTTACAGCC  
TCACCTGGTGTAGGAGGTGCAACGTCCCACTCGAAAGCTGAAGAGCATATTTTGAATCT  
GTGCCAATCTCGATGCATGTAGAATTATGACTGTTGAAGAGCATGCCTCCCAGCTAAAGAA  
TCAGGTGAAGGAACCGGCTAAGAAGACTGTAATTGCAGATGACAAAAAAGGAATCCATTT  
AAAGAGAGAATTAGTGAGATCATGACAGAAATACAAAATATTGCCAGCTGCATCCCAAGT  
CTGAGTTTGGAACTCAGACATACGAACAGTGGGTGATCAGAGAAGAGAGAAGAGCTGCAA  
AAGAAGAAAAGCGCAGGGAACGTGTCTGTGCAGAACACTTGAAGAAATACAATGATGCTCT  
CCAGATAAATGACACCATCCGAATGGTGGATGCCTACAATCACCTAAATAGCTTCTATAAAG  
AGGAGCAAAGTAAGAAGACAGTAAGGAGTGATGATGATGATTATGATGATGATGATGA  
TGATGAACCAGCAGTATCTAAACAGGATGAAACAGATGAATTTCTAATAGGTTTATTTAATG  
CAAAAAGAAACAGCTGGAAGAGTTGACTGGAAATCCAGAAAATGAAAATGAGAAGTTAAT  
AAAGTTGAGAAATACTTTAATGGAGGAATTCACAAAGACTAAGGAACCTCGAGGAATCATT  
TCACAAAGACTCGTCTAAGTGCCTCTGCTCTATTCCAGTGGATTAAGGACAACCCAAAATTT  
GAAGAAGTGGGAATTAGGGCTCATTATCTTATTGGCTCTGGACATAAGAGTGAAATGAAGC  
CCATGACTCAGAATGAACAAAGGGAAGTCATTGATAAATTTGACGTGGAAATGTAAATTTA  
CTAATTGCTACTACTGTAGCTGAGGAAGGCCTGGACATCAAAGAGTGTAATATCGTTATTC

GCTATGGCCTCGTCACCAATGAAATTGCTATGGTGCAGGCTCGTGGGAGAGCTCGAGCTG  
ATGAAAGCACCTATGCTGTTGTGGCTTCGACTGGCTCAGGGGCTATTGAATGTGAAGATGT  
TAATATTTTTTCGTGAGAAAATGATGTATAAGGCCATTTCAGCGTGTCCAGAAGATGCCACAG  
GAAGAGTATTTAAATAAGATTGAGAGTTTCCAGTTGCAAAGTATAGTGGAACAAATGAA  
GACAAAGAGGGATCAGCTCAAGACATACAAGAAAAATCCTTCACTTATAAAATTCTTATGCA  
AAAATTGCTCCAAGCCGATATGTTCCGGAGAAGACATCCAAGTTATTGAAAACATGCATCAT  
GTCAGTGTGAAAAAAGATTTCCAAAGTCATTATCATACAAGAGAAAATAAAACACTGCAGGA  
TAAGCAAGCTGATAATCAGACAAATGGGGAAATTATATGCAAAGACTGTGGACAAGCTTGG  
GGAAATATGATGGTTCACCGAGGTCTTGACCTGCCTTGTCTAAAGATTAGAAATTTTGTAGT  
TGTGTTTGCAGACAAGAAAACAACAAAGGAAATTTTAAAGAGATGGGGAGATCTGCCCATC  
AGGTTTCCTAGTTTTGATTATGCAGCTCACTGTCTTCAAGTGATGAAGATTAA

>dendrocopos\_noguchii-mda5

ATGGTAGAGTCCTCCCGAGACAAGCGCTTCCTCTACATGATCTCCTGCTTTAGGCCGCGG  
CTGAAGCAGTGCATCCGGGTGCAGCCGGTGCTGGACCAGCTTTTCTCGCTAAGCGCCGAA  
GAAAAGGAGAAGGTGCGGGTGGCCGCCTTGACGCGGGGCGATGTGGAGGGAGCAGAGG  
AACTGCTGCGGGCCGTGGAGCGGGGGCCCCGCGGCTGTGGCTGGTTCCTCGAGTTCCTG  
CAGGCGCTTGAGAACGGCGGGTGCAGCCTGGCCGCTGCTACATAAACCCCGAGCTCAG  
CCAGCTGCCCTCGCCGGCCGAGGAGGCCGACCATGACCTCTGCGTGCAGTTGGTGCAAC  
TACTCCACAGCACGCTGGTGGATAAAATACGGACCGTAGAATTGGCAGAGAAGTGCATGG  
AGATGGGCATCTTCCAGGAAGAGGACTTGGATCGGATCCATGCTGTTACTGACAATCGTG  
GGAACAGAGATGGTGCAAGGGAGCTATTGAGCAGAATAGTGCAGAAGAAGGACTGGTTCT  
CTCATTTTTTATTGCTCTGCGTGAAACCCAACACGGAAGCCTTGACAGATGAATTAAGTGG  
AAATACAAAAGGAACAGAGAACAGACAAAATGGGATGAAGAACAGTACAAATGAAGAATTG  
GAGGATTTGAAACAGCAGGAAAATGTGAATGATAGTTTCAACAGTGAGAACAATATATTGG  
AAACATCTGTTGGAAGAATTCTGTCAATTCAGAATCAGATGTCTTCACAGGAGATGGAAGT  
GTCAGCTTGAATGAAAACCTGGGACAGTCTTACAATACCAGTGATTACAGATGAAGATGAAG  
GGGAGAACAGAGCTTCACCAGAGCCAGATTTGATCCTGAGAGATTACCAGATGGAAGTTG  
CAAAGCCAGCCCTGAATGGAGAGAATATTATAATATGTCTTCTACAGGCAGTGGTAAAC  
CAGAGTGGCTGTTTACATTACCAAAGATCACTTGGATAAGAAGAAAAGAGCATTAGAGCCT  
GGAAAAGTTATAGTACTTGTTAACAAGGTCTCATTGGTAGAACAGCATTTACAAACGGAGTT  
TAATCCATTCTTGAAGCGCTGGTATCACGTTACTGGTTTAAGTGGTGATACTCAGCTGAAAA  
TCTCATTTTCTGAAGTTGTCAGAAGACATGATGTCATCATCAGTACAGCACAGATCCTAGAG  
AATTCATCTGATTAATGCAGCTAAAGAAGATGAAGAAGGTGTCCACTTATCAGATTTTTTCACT  
CATCATTATTGATGAATGTCATCACACGCAAAAGGAAGGTGTCTACAACAACATAATGCGAC  
GTTACTTAAAACAAAAGATTAAGAACAAGAAGCTAGCAAAAGAAAACAAGCCACTGATCCCA  
CAGCCTCAGATTCTGGGACTTACAGCCTCACCAGGTGTAGGAAGTGCAACATCTTCCTTAA  
AAGCTGAAGAACATATTCTGAGAATCTGTGCCAATCTTGATGCCCATAGAATCATGACTGTT  
GAAGAGCATGCCTCCCAGTTGAAGAATCAGGTGAAAGAACCATATAAAAAAACTGTGATTG  
CAGATGACAAAAGAAAGGATCCATTTAGAGAGAGAATTACTGAGATCATGACAGACATTCA  
AACTATTGCCAGCTCCATCCAAAATCTGAGTTTGGAAGTCAAGCCATATGAACAGTGGGTG  
ATTAGAGAAGAGAGAAGAGCTGCAAAAGAAAAAACCAGCAAGGAACGTGTCTGTGCAGAA  
CACCTGAAGAAATACAATGATGCTCTCCAGATAAATGACACCATCCGAATGATAGATGCATA  
CAATCACCTACGTGACTTTTTATAAGGAGGAGAAAAGTAAAAAGATGGTAAGGAGTGATGAC  
GATGATGATGATGAACCAGCAGTAACAAAACAGGATGAAACAGATGAATTTCTAATAGATTT

ATTTTCATGCAAAAAGGAAACAGCTGAAAGACTTGGCTAGAAATCCAGAATATGAAAATGAG  
AAGCTAATACAGCTGCGAAACACTTTAATGGAGGAGTTCACAAAGACTGAGGAACCTAGAG  
GAATTATTTTCACAAAGACTCGGCTAAGTGCCTTTGCTCTGTTCCAGTGGATTAAGGATAAC  
CCAAAATTTGAAGAAGTGGGAATTAAGGCCATTACCTCATCGGAGCTGGACATAACAGTG  
AACTAAACATATGACTCAGAATGCACAAAGGGATGTTATTGATAAATCCGAAGTGGAAAT  
GTAAATTTACTTATTGCTACCACTGTAGCTGAGGAAGGCCTAGATATCAAAGAGTGTAACAT  
TGTTATTCGCTATGGCCTCGTCACCAATGAAATTGCTATGATGCAGGCTCGTGCTGAGCT  
CGAGCTGCTGAGAGCACCTATGCACTTGTGGCTTCAGTTGGCTCAGGAGCTGTTGAACGT  
GAGGATGTTAATGTTTTCCGTGAGAAAATGATGTATAAGGCCATTCAACGTCTCCAGAAGAT  
GCCACAGGAAGAGTATTTAAATAAGATTCAGGAATTCCAGTTGCAAAGTGTACTGGAAAGA  
CGCATGAAGGCCAAAGAGAGATCAGCACAAAGACACACAAGAAAAATTCTTCCTTAATAAAATT  
CCTATGCAAAAATTGCCACAACTGATATGTTCTGGAGAAGATATTCAAGTTATTGAAAACA  
TGCATCATGTCAGTGTGAAAAAAGATTTCCAAAGTCTTTATCATACAAGAGAAAAATAAGACA  
CTGCAAGATAACCATGCTGATTACCAGACAAATGGGGAGATTATATGTAAAGACTGTGGAC  
AAGCTTGGGGAAATATCATGGTTCACCGAGGTCTTGACCTACCTTGTCTAAAGATTAGCAA  
TTTTGTGGTTGTGTTTGAAGACAAAAGCCAACAGAACATATTTTTAAAAAATGGAAAGATC  
TGCCTGTTAGTTTCCCTAGGTTTGATTATGCAGCTCATTGTTCTTCAAGTGATGAAGATTAA

>diphylloides\_magnificus-mda5

ATGGCAGACAGCACCCGGGACGAGCTGTTCTGTACATCATCTCCTGCTTCAGGCCGCGG  
CTGAGGCAGTGGATCCAGGTGCAGCCCGTGCTGGACCGGCTCCCCTCGCTGAGCGCGGA  
GGACAGGGAGAGGGTGCGTGCGGCCGCCCTGCAGCGGGGCCAGGCGGCGGGGGCGGA  
GGAGCTGCTGCGGGCCGTGGAGCGGGGGCCCCGCGGCTGCGGCTGGATCCGCGAGTTC  
CTGCAGGCGCTGGAGCACGGCGGCTGCAGCCTGGCCGCTGCTACGCCAACCCAGCCT  
GAGCCAGCTGCCCTCGCCGGCAGAGGAGGCCGAGCACGACCTCTGCGTGACCTGGTGC  
AGCTGCTCCACGGCACGCTGGTGGACAGGATGCGGACCGTGACGGTGGCCGAGAAGTGC  
CTGGAGATGGGCATCTTCCGGGACGAGGACATGGATCAGATCCAGACTGTTGCTGACAA  
CGTGGGAACAGAGATGGTGCGAGGGAGCTACTGAGCAGAATAGTGCAGAAGAAAGATTG  
GTTCTCTTCTTTTTTATTGCTCTCCGTGAACTCAACATGAAGACCTTGCAGATGATTTAA  
GCGGAAATACAGGAGGAACAGAGAATAAACAAAAATGGGATGGAGAAGAGTACAAACAAAG  
AAGCAGAAATTACAAGCCAACCAGGATACATCACAGCGGAGAATTTGAAACAGGAAGAAAA  
TGTGGATGATAGTTTCAGCAGTGAGAACAGTGTATTGAAACATCCACAGAAAAGAATTCT  
GTGGTGTGAGAGTCAGATGTCTCCATAGGAGATGGAAGTGTGAGTAACTTGAATGAAAACC  
TGGGACAGAGCTGCACAACCAAGTATTGAGATGAAGGGGAGAGGAGAGCCTCACCTGAG  
CCAGATCTGACCCTGAGAGATTACCAGATGGAAGTTGCAAAGCCAGCACTGAATGGGGAG  
AATGTTATAATATGTCTCCCTACAGGCAGTGGTAAAACCAGAGTGGCTGTTTACATTACCAA  
AGATCACTTGGATAAGAAGAGAAGAGCATCAGAGCCTGGAAAAGTCATAGTACTTGTTAAT  
AAGGTGCCATTGGTAGAACAGCATTTACAAACAGAGTTTAGTCCATTCCCTGAAGCGTTGGT  
ATCAGGTTATTGGTTTAAGTGGTATTCTCAGCTGAAAATCTCATTTCCCTGAAGTTGTCAGA  
AGAAATGATGTCATCATCAGTACAGCACAGATCCTTGAGAATTCAGTGTAAATGCATCCAA  
GGAAGATGAAGAAGGTGTCCACTTATCAGATTTTTCCCTCATCATTATTGATGAGTGTATC  
ACACTCAAAGGAAGGTGTCTACAACAATATAATGCGACGTTACTTAAAAGAAAAGATGAAG  
AACAGGAAGCTGGCGAAAAGAAAACAAACCACAGATCCCACAGCCTCAGATTCTGGGACTG  
ACAGCCTCACCTGGTGTAGGAGGTGCAACATCCTACTCAAAGCTGAGGAGCATATTCTGA  
AAATCTGTGCCAATCTTGATGCATGTAGAATTATGACTGTTGAAGAGCATGTCTCCAGCTA

AAAAATCAGGTAAAGGAACCGTCTAAGAAGACTGTGATTGCAGATGACAAAAAAGGGATC  
CATTTAAAGAGAGAATTACTGAGATCATGACAGAAATACAAAATTATTGCCAGTTGCATCCA  
AAATCTGAGTTTGGAACCTCAGACATATGAACAGTGGGTGATCAGAGAAGAGAAAAGAGCTG  
CAAAAGAAGAAAAACGCAGGGAACGTGTCTGTGCAGAACACTTGAAGAAATACAATGATGC  
TCTCCAGATAAATGACACCATCCGAATGGTGGATGCCTACAATCACCTAAATAACTTTTATA  
AAGAGGAGAAAAGTAAGAAGACAGTAAGGAGTGATGATGATGATGATGATGAACCAG  
CAGTATCAAAACAGGATGAAACAGATGAATTTCTAATAGGTTTATTTTCATGCAAAAAAGAAA  
CAGCTGAAAGAGTTGACGGGAAAGCCAGAAAATGAAAATGAGAAGCTAATAAAGTTGAGAA  
ATACTTTAATGGAGGAGTTCACAAAGACTGAGGAACCTCGAGGAATTATTTTCACAAAGACT  
CGTCTAAGTGCCTTTGCTCTATTCCAGTGGATTAAGGACAACCCGAAATTTGAAGAAGTGG  
GAATTAGGGCCCATTTATCTTATCGGCTCTGGACATAACAGTGAGATGAAGCCCATGACTCA  
GAATGAGCAAAGGGAAGTTATTGATAAATTTGACGTGGAAATGTAAATTTACTAATTGCTA  
CTACCGTAGCTGAGGAAGGCCTGGACATCAAAGAGTGTAACATTGTTATTCGCTATGGCCT  
TGTCACCAATGAAATTGCTATGCTGCAGGCTCGTGGTCGAGCTCGAGCTGATGAAAGCAC  
CTATGCTCTTGTGGCTTCAAGTGGCTCAGGGGCTGTTGAACGTGAAGATGTTAATATTTTTTC  
GTGAGAAAATGATGTATAAGGCCATTTCAGCGTGTCCAGAAGATGCCACAGGAAGAGTATTT  
AAACAAGATTCAGAGCTTCCAGTTGCAAAGTATAGTGGAAGGCAAATGAAGGCAAAGAGA  
GATCAGCGCAAGACATACAAGAAAAATCCTTCACTAATAAAATTCCTATGCAAAACTTGCTA  
CAAGCCGGTATGTTCTGGAGAAGACATACAAGTTATTGAAGACATGCATCATGTCAGTGTG  
AGAAAAGATTTCCAAAGTCTTTATCAAACAAGAGAAAATAAACTCTGCAAGATAAGCGTGC  
TGATTACCAGACCAATGGGGAAATTATATGTAAACATTGTGGACAAGCTTGGGGAAATATG  
ATGGTACACCGAGGTCTTGACCTGCCTTGTCTAAAGATTAGAAATTTTGTGGTTGTGTTTGC  
AGACAAGAAAACAACAAAGCAAATTTTAAAGAAATGGGGAGAACTGCCCATCAGGTTTCT  
GGTTTTGATTATGCAGCTCATTGTCCTTCAAGTGATGAAGATTAA

>dromaius\_novaehollandiae-mda5

ATGTCGGCGGAGTCCGGAGCCGAGCGCTTCTCTACATGATCCTGTGCTTCAGGGCGCG  
GCTGAAGCGCGTCATCCGCGTGCAGCCGGTGTGACTGGCTGCCCTCACTGAGCGCCG  
AGGAGCGGGAGCGGGTGCGGGCCGCGGCGCTGCAGCAGGGCGAGGTGGAGGCGGCGG  
AGCTGCTGCTGCGCGCCGTGGAGCGGGGGCCCCGCGACCGCTTCCCCGAGTTCTCTGCA  
GGCGCTGGAGCGCGGCGGCTGCGGCCTGGCCGCCTGCTACGTGAACCCAGCCAGCTG  
CCCTCGCCGGCGGAGGAGGCCGAAAACGACCTCTGCGTGCACCTTGGTGCAGCTGCTCCA  
CGGCACGCTGGTGGATAACATGCGTGCCACGCAGGTGGCCGAGAAGTGCCTGCAGATGG  
GCATCTTCCAGGTCGAGGATGTGGAGCGGATCCAGACTGTTACTGAAAGTCGTGGGAATA  
GAGATGGTGCAAGGGAGCTGCTAAGTAGAATAGTTCAGAAGAAGGACTGGTTCTCCCTTT  
TTTGATTGCTTTGCGTGAAACCCAGCATGAAGACCTTGCAAATGATTTAAGTGGAATACAA  
GAGGAGTAGAAAATAGAGAAAATGGGATGAATAACAGGACAAATGAAGAAGCAGAAGTCG  
CAATGCAGCTGGAACATGCTGTAGTGGAGGATTTCAAACAGCAAGAAAATATGAATGATAG  
TTTAGGCAGTGAGAGCATTGTTTCGGAAAGATCTGTTGGAGAGAATTCTGTAGCTTCAGAG  
TCTGATGTCTCTGTAGGAGATGGAAGTGTGAGTAATGCGAATGAAAACCTGGGACAGAGCA  
GCAGCACAACCAAGTGATTCAGATGAAGATGAAGTGGAGAGCAGAGCTTCACCTGAGCCAG  
AGCTGATCCTGAGAGATTACCAGATGGAAGTTGCAAACCAAGCATTGAATGGGGAGAATAT  
TATAATATGTCTCCCTACAGGCAGTGGTAAAACCAAGAGTGGCTGTTTACATTACCAAAGATC  
ACTTGGATAAGAAGAGAAGAGCATCAGAGCCTGGAAAAGTTATAGTACTTGTTAATAAGGT  
GCCATTGGTGGAACAGCATTTACGAAAGGAGTTTCATCCATTCTGAAGCGTTGGTATCAG



GTTATTGGTTTAAGTGGTGATTGTCAGCTGAAAATCTCATTTCTGAAGTTGTCAGAAGAAA  
TGATGTCATAATCAGTACAGCCCAGATCCTTGAGAATTCAGTGTAAATGCAACTAAAGAAG  
ATGAGGAAGGTGTCCATTTATCAGATTTTTCACTTATAATTATTGATGAATGTCATCACACTC  
AAAAGGAAGGTGTCTACAACAATATAATGCGACGTTACTTAAAAGAAAAGATGAAGAATGG  
GAAGCTGGCAAAAGAAAACAGACCATTTCGTTCCACAGCCTCAGATTCTGGGACTTACAGCC  
TCACCTGGTGTAGGAGGTGCAACATCCTATTTGAAAGCTGAAGAACATATTCTGAAAATCT  
GTGCCAGTCTTGATGCATGTAGAATCATGACTGTTGAAGAGCATGCCTCCCAACTGAGGAA  
TCAGGTGAAGGAACCATATAAGAAGACTGTGATTGCGGATGACAAAAGAAGGGATCCATTT  
AGAGAGAAAATTATTGAGATCATGACAGACATTCAAACTATTGCCAGCTCCATCCAAAATC  
TGAGTTTGGAAGTCAAGCATATGAACAGTGGATGATCAGAGAGGAGAAAAAAGCGGCAAA  
AGAAGAAAAACGCAAGGAACGTGTCTGTGCAGAACATCTGAAGAAATACAATGATGCTTTG  
CAATAAATGACACTATTCGAATGGTTGATGCATACAATCACCTACGTAACCTTTTATAAGGA  
GGAAAAAAGCAAAAAAACAGTAGTGAGTGATGATGAGGATGAACCAGCAGTATCAAAACAG  
GATGAAACAGACAAATTTCTAATGGGTTTATTCAATGCAAAGAAGAAACAGCTGAAAGAGTT  
GGCTAGAAAGCCCGAATATGAAAATGAGACTCTAACAAAGTTGCGAAACACTTTAATGGAG  
GAGTTCACAAAGACCGTTGAACCGAGAGGAATTATTTTCACAAAGACTCGGCAAAGTGCCT  
TTGCTCTGTTCCAGTGGATTAAGGATAACACAAAATTTGAAGAAAGTGGGAATTAAGGCCCA  
TTATCTTATTGGTGCTGGACACAACAGTGAACTAAACCCATGACTCAGAATGAGCAAAGG  
GAAGTCATTGGTAAATTCCGAGATGGAAGTGTAACCTTACTCATTGCTACTACTGTAGCTGA  
GGAAGGCCTGGACATCAAGGAGTGTAACATTGTTATTCGCTATGGCCTTGTCACCAATGAA  
ATTGCTATGTTGCAGGCCCGTGGTCGAGCTCGAGCTGATGAGAGCACCTATGCACTTGTG  
GCTTCAAGCGACTCAGGAGCTGTTGAACGTGAGAATGTTAATAGTTTCCGTGAGAAAATGA  
TGTATAAGGCCATTACAGCGTGTCCAGAAGATGCCACAGAAGGAGTATTTAAACAAGATTCA  
GACCTTCCAGTTGCAAAGTATAATGGAAGAAAGAAATGAAGGCAAAGAGAGATCAGTGTAAG  
ACATATAAGAGAAATCCTTCACTAATAAAATTCCTATGCAAAAATTGCCACAAGCTGATATG  
CTCAGGAGAAGATATACAAGTTATTGAAAACATGCATCACGTCAGTGTGAAAGAAGATTTTC  
AAAGCCTTTACCATACAAGAGAAAAATAAGACACTGCAAGATAAACATGCTGATTACCAGACA  
AATGGGGAAATTATATGTAAAGACTGTGGACAAGCTTGGGGAAATATGATGGTTACCGGAG  
GTCTTGACCTGCCTTGTCTAAAGATTAATAATTTTGTGGTTGTGTTTGAAGACAAGAAAACA  
ATAAAGCAAATTTTTTAAGAAATGGGGAGAACTGCCAGTCGGGTTCCCTGTTTTTGATTATGC  
AGGTCATTGTCCTTCAAGTGATGAAGATTAA

>egretta\_garzetta-mda5

ATGGCAGAGGAGCCCCGAGACGATCGCTTCCTCTATCTGATCGCCTGCTTCAGGCCGCGG  
CTGAAGCAGTTCATCCGGGTGCAGCCGGTGCTGGACCGGCTTCCTCGCTGGGCGCGGA  
GGAGAGGGGAGAAGGTGCGGGCGGCCGCCCTGCAGCGGGGCGAGGTGGAGGCGGCGGA  
GGAGCTGCTGCGGGCCGTGGAGCGGGGGCCCCGCGGGTGCGGCTGGTTCCACGAGTTC  
CTGCAGGCGCTGGAGCACGGCGGCTGCAGCCTGGCCGCCTGCTACGTGAACCCAGCCT  
CAGCCAGCTGCCCTCGCCAGCCGAGGAGGCCGACCACGACCTCTGCGTGCACTTGGTG  
AGCTGCTCCACAGCACGCTGGTGGATAGAATGCAGACCGTGCAGGTGGCCGAGAAGTGC  
CTGCAGATGGGCATCTTCCAGGATGAGGACCTGGATCGGATCCCACTGTTACTGACAAT  
CGTGGGAATAGAGATGGTGCAAGGGAGCTATTGAGCAGAATAGTGCAGAAGAAAGATTGG  
TTCTCTCCTTTTTTGATTGCTCTGCGTGAAACCCAACATGGAGACCTTGCAGATGATTTAAG  
TGGAATACAGGAGGAACAGAGAATAAACAAAGTGGGATGAAGAACAGTATGAATGGAGA  
AACAGAAGTGACAAGCCGACCAGGATATGCCATAGTGGAGGATTTGAAACAGCAAGAAAAT

GTGAATGATAGTTTCAGCAGGGAGAGCAGTGTATTGGAAACATCTATTGGAAAGAATTCTG  
TCGTTTCAGAGTCGGATGTCTCCATAGGAGATGGAAGCATCAGTAACTTGAATGAAAACCT  
GGGACAGAGCTGCACAACCAGTGATTGAGATGAAGATGAAGTGGAGAGCAGAGCTTCACC  
TGAGCCAGATCTGATCCTGAGAGATTACCAGATGGAAGTTGCAAAGCCAGCACTGAATGG  
GGAGAATATTATAATATGTCTCCCTACAGGCAGTGGTAAAACCAGAGTGGCTGTTTACATTA  
CCAAAGATCACTTGGATAAGAAGAAAAGAGCATCTGAGCCTGGAAAAGTTATAGTACTTGT  
TAATAAGGTACCACTGGTAGAACAGCATTTACGAAAGGAGTTTAATCCATTCTGAAGCGTT  
GGTATCAGGTTATTGGTTTAAGTGGTGATTCTCAGCTGAAAATCTCATTTCTGAAGTTGTC  
AGAAGAAATGATGTCATCATCAGTACAGCACAGATCCTTGAGAATTCAGTGTAAATGCAGC  
CAAAGAAGATGAAGAAGGCGTCCACTTATCAGATTTTTCACTCATCATTATCGATGAGTGTC  
ATCACACTCAGAAGGAAGGTGTCTACAACAATATAATGCGACGTTACTTAAAAGAAAAGATG  
AAGAACAGGAAGCTGGCAAAAGAAAACAAGCCACTGATCCACAGCCTCAGATTCTGGGA  
CTTACAGCCTCACCTGGTGTAGGAGGTGCAACATCTTACTCAAAGCTGAAGAACATATTC  
TGAAAATCTGTGCCAATCTTGATGCATGTAGAATCATGACTGTTGAAGAGCATGCCTCCCA  
ATTGAAGAATCAGGTGAAGGAACCATATAAGAAGACTGTGATTGCAGATGACAAAAGAAGG  
GATCCATTTAGAGAGAAAATTACTGAGATCATGACAGACATTCAAACCTATTGCCAGCTCCA  
TCCAAAATCTGAGTTTGGAACCTCAGCCATATGAACAGTGGGTGATTAGAGAAGAGAGAAAA  
GCTGCAAAAGAAGAAAAACGCAAGGAACGTGTTTGTGCAGAACACTTGAAGAAATACAACG  
ATGCTCTCCAGATAAATGACACCATCCGAATGGTGGATGCATACAATCACCTAAATAATTTT  
TATAAAGAGGAGAAAAAGTAAGAAGGCAGTAAGGAGTGATGATGATGATGATGAACCAG  
CAGTATCAAAACAGGATGAAACAGATGAATTTCTAATACATTTATTTCAAGCAAAAAAGAAAA  
AGCTGAAAGAGTTGGCTAGAAAGCCAGAATATGAAAATGAGAAGCTAATACAGTTGCGAAA  
CACTTTAATGGAGGAGTTCACGAAGACTGAGGAACCTAGAGGAATTATTTTACAAAGACT  
CGGCTAAGTGCCTTTGCTCTATTCCAGTGGATTAAGGATAATCCAAAATTTGAAGAAGTGG  
GAATTAAGGCCCATTTATCTTATTGGTGCTGGACATAACAGTGAAATTAACCCCATGACTCAG  
AATGAGCAAAGGGAAGTTATTGATAAATCCGAGGTGGAAATGTAAATTTACTTATTGCTAC  
TACTGTAGCTGAGGAAGGCCTAGACATCAAAGAGTGCAACATCGTTATTCGCTATGGCCTT  
GTCACCAATGAAATTGCTATGGTGCAGGCTCGCGGTGAGCTCGAGCTGATGAGAGCACC  
TATGCACTTGTGGCTTCGAGTGGCTCGGGAGCTGTTGAACGTGAAGATGTTAATATTTTCC  
GTGAAAAAATGATGTATAAGGCCATTGAGAGTGTCCAGAAGATGCCACAGGAAGAGTATTT  
AAATAAGATTCATAATTTCCAGTTGCAAAGTATAGTGAAAAACAAATGAAGGCAAGGAGAG  
ATCAGCACAAAGACGTACAAGAAAAATCCTTCACTAATAACATTCTTATGCAAAAATTGCCAC  
AAGCTGATATGTTCTGGAGATGACATACAAGTTATTGAAAACATGCATCATGTGAGCGTGAA  
AAAAGATTTCCAAAGTCTTTACCATACGAGGGAAAAATAAGACACTGCAAGATAAGCATGCC  
GATTACCAAACAAACGGGGAAATTATATGTAAAGATTGTGGACAAGCTTGGGGAAATATGA  
TGGTTCACCGAGGTCTTGACCTGCCTTGTCTGAAGATTAGAAATTTTGTGGTTGTGTTTGAA  
GACAAGAAAACAACAAAGCAAATTTTTAAGAAATGGGGAGAACTGCCCATCAGGTTCCCTA  
GTTTTGATTATGCAGCTCATTGTCCTTCAAGTGATGAAGATTAA

>empidonax\_traillii-mda5

ATGGAAGAGGGGGACCGGGACGAGCAGTTCTCTACATGATCTCCTGCTTCAGGCCGCG  
GCTGAAGCAGTTCATCCAGGTGCAGCCCGTGCTGGACCAGCTCCCCTCGCTGAGCGCGG  
AGGAGAGGGAGAAAGGTGCGGGCGGCCGTCTGCAGCGGGGCGAGGTGGCGGGGGCGG  
AGGAGCTGCTGCGGGCCGTGGAGCGGGGACCCCGCGGCTGCGGCTGTTCCACGAGTT  
CCTGCAGGCGCTGGAGCACGGCGGCTGTAGCCTGGCCGCCTGCTACGCCAACCCAGCC

TCAGCCAGCTGCCCTCGCCGGCCGAGGAGGCCGACACGACCTCTGCGTGACCTGGTA  
CAGCTGCTCCACAGCGCGCTGGTGGACAGGATGCAGCCCGTGAGGTGGCCGAGAAGTG  
CCTGGAAATGGGCATCTTCACGGAGGAGGACCTGGATCGGATCCACACTGCTACTGACAA  
TCGTGGGAACAAGGAGGGTGCAAGGGAACCTTCTGAGCAGAATAATGCGGAAGAAAGATTG  
GTTCTCTCCCTTTTTACTTGCTCTCCGTGAAACCCAACATGAAGACCTAGCAAATGAATTAA  
GTGGAGATACAGGAGGAACAGAGAATAGACAAAGTGAGATGAAGAACAGTACAAATGAAG  
AAACGGAAATTACAAGCCAACCACGATATGCCATAGTGGAGGATTTGAAACAGCAAGAAAA  
TGTGATTGATAGTTTCAGCAGTGAGAACAGTGTATTGGAAACATCCTTGGGAGAGAATTCT  
GTAGATTCAGAGTCAGATGTCTCCATAGGAGATGGAAGTGTCCGTAACCTTCAATGAAAAAC  
TGGGCCAGAGCTGCACAACCAGTGATTCAGATGAAGAGGAGAGGAGAGCTTCCCCTGAGC  
TAGATCTGACCCTGAGAGATTACCAGATGGAAGTTGCAAAGCCAGCACTGAATGGGGAGA  
ATATTATAATATGTCTCCCTACAGGCACTGGTAAAACCAGGGTGGCTGTTTACATTACCAAA  
GATCACTTGGATAAGAAGAAAAGAGTGTGAGAACCTGGAAAAGTCATAGTACTCGTTAATA  
AGGTACCATTGGTAGAACAGCATTTAGAATCAGAGTTTCATCCATTCTGAAGCATTGGTAT  
CAAGTTATTGGTTTAAGTGGTGATACTCAACTGAAAATCTCATTTCTGAAGTTGTCAGAAA  
AAATGATGTCATCATCTGTACAGCACAGATCCTTGAGAATTCATCATAAATGCAGACAAGG  
AAGATGAAGAAGGTGTCCACTTATCAGATTTTTCCCTTATCATTATTGATGAGTGTATCAC  
ACTCAGAAGGAAGGAGTCTACAACAATATAATGCGACGTTACTTAAAAGAAAAGATGAAGA  
ACAGGAAGCTGGCAAAAGAAAACAAACCACTGATCCCACAGCCTCAGGTTGTGGGACTTA  
CAGCCTCACCTGGTGTAGGAGGTGCAACATCCTACTCAAAGCTGAAGAGCATATTCTGAA  
AATCTGTGCCAATCTTGATGCATGTAGAATTATGACTGTTGAAGAGCATGCAGACCAGTTAA  
AGAATCAGGTGAAGGAGCCGTCTAAGAAGACTGTGGTTGCAAATGACAAAAAAGGGATC  
CATTTAGAGAGGAAATTACTGAGATCATGACAGAAATACAAAATATTGCCACCTCCATCCA  
AAATCTGAGTTTGGAACTCAGACATATGAACAGTGGGTGATCAAAGAAGAGAGAAGAGCTG  
CAAAAGAAGAAAAACGCAAGGAACGCGTCTGTGCAGAACACTTGAAGAAATACAATGATGC  
TCTCCTGATAAATGAGAGTATCCGAATGGTGGATGCATACAATCACCTAACTTTTTATG  
AGGAGGAAAAAAGTAAGAAGACAGCAAGGAGTGATGACGATGATGATGATGAACCAACTG  
TATCAAAACAGGATGAAACAGATGAATTTCTAATAGGTTTATTTTCATGCAAAAAAGAAGAGG  
CTGAAAAAGTTGGCTGGAAAGCCAGAACATGAAAATGAGAATCTCATACAGTTGCGAAATA  
CTTTAATGGAGGAGTTCACGAAGACTGAGGAACCTAGAGGAATTATTTTCACAAAGACTCG  
TCTAAGTGCCTTTGCTCTATTCCAGTGGATTCAAGACAACCCAAAATTTGAAGAAGTGGGAA  
TTAAGGCCCGTTATCTTATCGGCTCTGGACATAACAGTGAAATGAAACCCATGACTCAGAA  
TGAGCAAAGGGGAAGTTATTGATAAATTCCGATGTGGAAATGTAAATTTACTTATCGCTACAA  
CTGTAGCTGAGGAAGGTCTGGACATCAAAGAGTGTAACATTGTTATTCGCTATGGCCTGGT  
CACCAATGAAATTGCTATGGTGCAGGCTCGTGGCCGAGCTCGAGCTGATGAGAGCACTTA  
TGCTCTTGTGGCTCCTAGTGGATCAGGAGCTGTTGAACGTGAAGATGTTAATATTTTCCGT  
GAGAAAATGATGTATAAGGCCATTGAGCGTGTCCAGAATATGCCACAGGAAGAGTATTTAA  
ATAAGATTCATAATTTCCAGTTGCAAAGTATACTGGAAAAACAAATGAAGGCAAAGAGAGAT  
CAGCGCAAGACATACAAGAAAAATCCTTCACTAGTAACATTCTTATGCAAAAATTGCCACAA  
ACTGGTATGTTCTGGAGAAGACATACAAGTTATTGAGCACATGCATCATGTGAGTGTGAAA  
AAAGATTTCCAAAGCCTTTACCATACAAGAGAAAAATAAGACACTGCAAGATAAGCATGCCG  
ATTACCAGACAAACGGGGAAATTATATGTAAAGATTGTGGACAAGCTTGGGGAAATATGAT  
GGTTCACCGAGGCCTTGACCTACCTTGTCTGAAGATTAGAAATTTTGTGGTTGTGTTTGCA  
GACAAGAAAACAACAAAGCAAATTTTTAAGAAATGGGGAGAACTGCCCATTAGGTTTCCTA

GCTTTGATTATGCAGCTCATTGTCTTCAAGTGATGAAGATTAA

>eopsaltria\_australis-mda5

ATGGCAGAGGCCAGCCGGGACGAGCGCTTCCTCTACATGATCTCCTGCTTCAGGCCGCG  
GCTGAGGCGGTTTCATCCAGGTGCAGCCCGTGCTGGACCAGCTGCCCTCGCTGAGCGCGG  
AGGACAGGGAGAGGGTGCGGGCGGCCGCCGTGCAGCGGGGCGCGGTGGCGGGCGCGG  
AGGAGCTGCTGCGCGCCGTGGAGCGGGGGCCCCGCGGCTGCGGCTGGATCCGCGAGTT  
CCTGCAGGCGCTGGAGCACGGCGGCTGCGGCCTGGCCGCTGCTACGCCAACCCACG  
CTGAGCCAGCTGCCCTCGCCCGCCGAGGAGGCCGAGCACGACCTGTGCGTGCAGCTGGT  
GCAGCTGCTGCACGGCACGCTGGTGGACAGGATGCGCGCCGTGCAGGTGGCACACAAGT  
GCCTGGAGATGGGCATCTTCCAGGACGAGGACATGGATCGGATCCAGACTGTTACTGACA  
ATCATGGGAACAGAGATGGTGCAGGGGAGCTACTGAGCAGAATAGTCCAGAAAAAGATT  
GGTTCTCTTCTTTTTTGGTTGCTCTTCGTGAAACCCAACATGAAGACCTTGCAGATGATTTA  
AGTGGAATACAGGAGGAACAGAGAATAAACAAAACGGGATGGAGAAGAGTCCAAATGAA  
AAAACAGAAGTTACAAGCCAACCAGGATACGTCATAGAGGAGAATTTGAAACAGGAAGAAA  
ATGTGGATGATAGTTTCAGCAGCGAGAACAGTATATTGGAAACATCCATAGAAAAGAATTCT  
GTGGTGTGAGAGTCAGATGCCTCCATAGGAGATGGAAGTGTGAGTAAGTGAATGAAAATC  
TGGAGCAGAGCTGCACAACGAGTGATTCAGATGAAGGGGAGAGGAGAGCCTCACCTGAG  
CCAGATCTGATCCTGAGAGATTACCAAATGGAAGTTGCAAAGCCAGCACTGAATGGGGAG  
AATATTATAATATGTCTCCCTACGGGCAGTGGTAAAACCAGAGTGGCTGTTTACATTACCAA  
AGATCATTTGGATAAGAAGAAAAGAGCATCAGAGCCTGGAAAAGTCATAGTACTTGTTAATA  
AGGTGCCATTGGTAGAACAGCATTACAAAAAGAGTTTAGTCCATTCTGAAGCATTGGTAT  
CAGGTTACTGGTTTAAAGTGGTATTCTCAGCTGAAAATCTCATTTCTGAAGTTGTCAGAAG  
AAATGATGTCATCATCAGTACAGCACAGATCCTTGAAAATTCAGTGTAAATGCATCCAAGG  
AAGATGAAGAAGGTGTCCACTTATCAGATTTTTCCCTCATCATTATCGATGAGTGTATCAC  
ACTCAAAGGAGGGTGTCTACAACAATATAATGCGACGTTACTTAAATGAAAAGATGAAGAA  
CAAGAAGCTGGCAAAGAAAACAAACCACTGATCCACAGCCTCAGATTCTGGGACTTACA  
GCCTCACCTGGTGTAGGAGGTGCAACATCCTACTCAAAGCTGAAGAGCATATTCTGAAAA  
TCTGTGCCAATCTTGATGCATGTAGAATTATGACTGTTGAAGAGCATGCCTCCCAGCTAAA  
GAATCAGGTGAAGGAACCGTCTAAGAAGACTGTGATTGCAGATGACAAAAAAGGGATCCA  
TTTAAAGAGAGAATTATTGAGATCATGACAGAAATACAGAACTATTGCCAGCTGCATCCAAA  
ATCTGAATTTGGAAGTCAACATATGAACAGTGGGTGATCAGAGAAGAGAGAAGAGCTGCC  
AAAGAAGAAAAACGCAGGGAACGTGTCTGTGCAGAACACTTGAAGAAATACAATGATGCTC  
TCCAGATAAATGACACCATCCGAATGGTGGATGCCTACAATCACCTAAATAACTTCTATAAA  
GAGGAGAAAAAGTAAGAAGACAGTAAGAAGTGATGATGATGATGATGAACCAGCAGTAT  
CAAAACAGGATGAAACAGATGAATTTCTAATAGGTTTATTTAATGCAAAAAAGAAACAGCTG  
AAAGAGTTGAGTGGAAAGCCAGAAAATGAAAATGAGAAGCTTATAAAGTTGAGAAATACTTT  
AATGGAGGAGTTCACAAAGACTGAGGAACCTCGAGGAATCATCTTCACAAAGACTCGTCTA  
AGTGCCCTTTGCTCTATTCCAGTGGATTAAGGACAACCCAAAATTTGAAGAAGTGGGAATTA  
GGGCCCATATCTTATTGGCTCTGGACATAACAGTGAAATGAAGCCTATGACTCAGAATGA  
GCAAAGGGAAGTTATTGATAAATTCGACATGGAAGTGTAAATTTACTCATTGCTACTACTG  
TAGCTGAGGAAGGCCTGGACATCAAAGAGTGTAACATCGTTATTCGCTATGGCCTCGTCAC  
CAATGAAATTGCTATGATGCAGGCTCGTGGTAGAGCTCGAGCTGATGAAAGCACCTATGCT  
CTCGTGGCTTCGATTGGCTCAGGGTCTATTGAGCGTGAAGATGTTAATATTTTTCTGTGAGA  
AAATGATGTATAAGGCCATTCAGCGCGTCCAGAAGATGCCACAGGAGGAGTATCTAAATAA

GATTCAGAGTTTCCAGTTGCAAAGTATAGTGGAAAAAAAAATGAAGGCAAAGAGAGATCAG  
CACAAGACATACAAGAAAAATCCTTCACTAATAAAATTCTTATGCAAAAATTGCTCCAAGCC  
GATATGTTCTGGAGAAGACATACAAGTTATTGAAGACATGCATCATGTCAGTGTGAAAGAA  
GATTTCCAAAGTCTTTATCATAACAAGAGAAAAATAAAACACTGCAAGATAAGAATGCTGATTA  
CCAGACAAATGGGGAAATTATATGTAAAGACTGTGGACAAGCTTGGGGAAATATGATGGTT  
CACCGTGGTCTTGACCTGCCTTGTCTAAAGATTAGAAATTTTGTGGTTGTGTTTGCAGACAA  
GAAAGCAACAAAGAAAATTTTAAAGAAATGGGGAGAACTGCCCATCAGGTTTCCTAGTTTTG  
ATTATGCAGCTCATTGTCCTTCGAGTGATGAAGATTAA

>eremophila\_alpestris-mds5

ATGGCAGAGGGCACCCGGGACGAGCGGTTCTGTACACAATCTCCTGCTTCAGGCCGCG  
GCTGCGGCAGTACATCCAGGTGCAGCCCGTGCTGGACGGGCTCCCTCGCTGAGCGCGG  
AGGACAGGGACAGGGTGCGTACGGCCGCCCTGCAGCGCGGCCAGGTGGCGGGCGCGGA  
GGAGCTGCTGCGGGCCGTGGAGCGAGGGCCCCGCGGCTGCGGCTGGATCCGCGAGTTC  
CTGCAGGCGCTGGAGCGCGGGGGCTGCAGCCTGGCCGCCTGCTACGCCAACCCAGCC  
TGAGCCAGCTGCCCTCGCCGGCAGAGGAGAGCGAGCACGACCTGTGCGTGCACCTGGTG  
CAGCTGCTGCACGGCACCCCTGGTGGACAGGATGCGCGCCGTGCCGGTGGCCGAGAAGT  
GCCTGGAGATGGGAATCTTCCAGGACGACGACATGGATCGGATCCAGACTGTTACTGACA  
ATCGTGGGAACAGAGATGGTGCAAGGGAGCTACTGAGCAGAATAGTCCAGAAGAAAGATT  
GGTTCTCTTCTTTTTTGTGTTGCTCTCCGTGAAACCCAGCATGAAGACCTTGCAAATGATTTA  
AGTGGAAATACAGGAGAGAATAAAACAAAATGGGATGGAGCAAACCACAAATGAAGAGACA  
GAAGTCGGAAGCCAACCTGGATACCTCATAGAGGAGAATTTGAAACAGGAAGAAAATGTG  
GATGATAGTTTTCAGCAGTGAGAACAGTGTGTTGGAAACATCCATTGAAAAGAATTCTGTGG  
TGTCAGAGTCAGATGTCTCCATAGGAGATGGGAATGTCAGTAACTTGTATGAAGACCTGGG  
ACAGAGCTGCACAACCAAGTGATTGAGATGAAGTGGAGAGGAGAGCCTCACCTCAGCCAGA  
TCTGACCCTGAGAGATTACCAGATGGAAGTTGCAAAGCCAGCACTGAATGGGGAGAATATT  
ATAATATGTCTCCCTACAGGCAGTGGTAAAACCAGAGTGGCTGTTTACATTACCAAAGATCA  
CTTGGATAAGAAGAAAAGAGCATCAGAGCCTGGAAAAGTCATAGTACTTGTTAATAAGGTT  
CCATTGGTAGAACAGCATTTACAAACAGAAATTTAGTCCATTTCTGAAGCGTTGGTATCAGGT  
TACTGGTTTAAAGTGGTGATTGTCAGCTGAAAATCTCATTTCTGAAGTTGTCAAAGAAATG  
ATGTCATCATCTGTACAGCACAGATCCTTGAGAATTCAGTGTTAAATGCATCCACGGAAGAT  
GAAGAAGGTGTCCACTTATCAGATTTTTCCCTCATCATTATTGATGAGTGTATCACACTCA  
AAAGGAAGGTGTCTACAACAATATAATGCGGCGCTACTTGAAAGAAAAGATGAAGAACAGG  
AAGCTGGCAAAAAGAAAACAAACCCCTGATCCACAGCCTCAGATTCTGGGACTCACAGCCT  
CACCTGGTGTAGGAGGTGCAACATCCTACTCAAAAGCTGAAGAACATATTCTGAAAATCTG  
TGCCAATCTCGATGCATGTAGAATTATGACTGTAGAAGAGCATGCCTCCAGCTAAAGAAT  
CAGGTGAAGGAACCAGCTAAGAAGACAGTGATTGCAGATGACAAAAAAGGGATCCATTTA  
AAGAGAAAATTACTGAGATCATGACAGAAATACAAAACCTACTGCCAGCTGTATCCCAAGTCT  
GAGTTTGGAAGTCAAGACATATGAACAGTGGGTGATCAGAGAAGAGAGAAGAGCTGCAAAA  
GAAGAAAAACGCAGGGAACGTGTCTGTGCAGAACACTTGAAGAAATACAATGATGCTCTCC  
AGATAAATGACACCATCCGAATGGTGGATGCCTACAATCACCTAAATAACTTCTATGAAGAG  
GAGAAAAAGTAAGAAGACAGTCAGGAGTGATGAGGATGATGATGATGATGATGAACCAGCA  
GTATCTAAACAGGATGAAACAGATGAATTTCTAATAGGTTTATTTTCATGCAAAGAAGAAACA  
GCTGGAAGAGTTGACTGGAAAGCCAGAAAATGAAAATGAGAAGCTAACAAAGTTGAGAAAT  
ACTTTAATGGAGGAGTTCACAAAGATTGAGGAACCTCGAGGAATCATTTTCACAAAGACTC

GTCTGAGTGCCTTTGCTCTATTCCAATGGATTAAGGACAACCCAAAATTTGCAGAAGTGGG  
AATTAGGGCCCATTATCTTATTGGGTCTGGACATAAGAGTGAAACGAAGCCCATGACTCAG  
AATGAGCAAAGGGAAGTTATTGATAAATTTGCACGTGGAAATCTAAATTTACTGATTGCTAC  
TACTGTAGCTGAGGAAGGCCTGGACATCAAAGAGTGTAACATTGTTATTTCGCTATGGCCTC  
GTCACCAATGAAATTGCTATGGTGCAGGCTCGTGGTAGAGCTCGAGCTGATGAAAGCACC  
TATACTCTTGTGGTTTTCGAGTGGCTCAGGGGCTGTTGAACGTGAAGATGTTAATATGTTTC  
GTGAGAAAATGATGTATAAGGCCATTACAGCGTGTCCAGAAGATGCCACAGGAAGAGTATTT  
AGATAAGATTGAGAGTTTCCAGTTGCAAAGTATAGTGGAACGAATGAAGGCAAAGAGA  
GATCAGCTCAAGACATATAAGAAAAATCCTTCCTTAATAAAATTCTTATGCAAAAATTGCTAC  
AAGTCAATATGTTCTGGAGAAGACATACAAGTTATTGAAGACATGCATCATGTCTGTGTGAA  
AAAAGATTTCCAAAGTCATTATCATACAAGAGAAAATAAAACACTGCAGGATAAGCATGCTG  
ATTACCAGACAAATGGGGAAATCATATGCAAAGACTGTGGACAAGCTTGGGGAAATATGAT  
GGTTCACCGAGGTCTTGACCTGCCTTGTCTAAAGATTAGAAATTTTGTGGTTGTGTTTGCAG  
ACAAGAAAACAACAAAGCAAGTTTTTAAGAAATGGGGAGATCTGCCCATCAGGTTTCCTAG  
TTTGGATTATGCAGCTCATTGTCCTTCAAGTGATGAAGATTAA

>erythrura\_gouldiae-mda5

ATGGCAGAGGGCACCCCGACGAGCGGTTCTCTACATGATCGCCTGCTTCAGGCCGCG  
GCTGAAGCAGATCATCCGCGTGAGAGCCCGTGCTGGACCAGCTCCCCTCGCTGAGCGCGG  
AGCAGAGGGAGCGGGTGCGCGCGGCCGCCCTGCAGCGCGGCGCGGCGGGCGCGCGG  
AGGAGCTGCTGCGCGCCGTGGAGCGGGGGCCCCGCGGCTGCGGCTGGGTCCGCGAGTT  
CCTGCAGGCGCTGGAGCGCGGCGGCTGCGGCCTGGCCGCCTGCTACGCCAACCCACGC  
CTGAGCCAGCTGCCCTCGCCGGCAGAGGAGGCCGAGCACGACCTCTGCGTGACCTGGT  
GCAGCTGCTGCACGGCACGCTGGTGGACAGGATGCGCGCCGTGCAGGTGGCCGAGAAG  
TGCCTGCAGGTGGGAATCTTCCAGGACGAGGACGTGGATCGGATCCAGACTGTTACTGAC  
AATCGTGGGAACAGAGATGGTGAAGGGAGTTACTGAGCAGAATAGTCCAGAAGAAAGAT  
TGGTTCTCTTCTTTTTTGATTGCTCTCCGTGAAACCCAGCATGAAGACCTTGCAGATGATTT  
AAGTGGAAATACAGGAGAGAATAAACAAAATGGGATGGAGCAGACTACAAATGAAGAAACA  
GAAGTTACAAGCCAACCAGGAAACGTCATAGAGGAGAATGTGAAACTGGAAGAAAATGTG  
GATGATAGTTTTCAGCAGTGAGAGCAGTCTGTTGGAAACATCCGTGCAAAAGAATTCTGTGG  
TGTCAGAGTCAGATGTCTCCATAGGAGATGGAAGTGTTAATAATTTGAATGAAAATCTGGAA  
CAGAGCTGCACAGCCAATGATTCAGATGAAGTGGAGAGGAGAGCCTCACCTGAGCCAGAT  
CTGACCCTGAGAGATTACCAGATGGAAGTGGCAAAGCCAGCATTGAATGGGGAGAATATT  
ATAATATGTCTCCCTACGGGCAGTGGTAAAACCAGAGTGGCAGTTTACATAACCAAAGATC  
ACTTGGACAAGAAGAAAAGAGCATCAGAGCCTGGAAAAGTCATAGTACTTGTTAATAAGGT  
TCCACTGGTAGAACAGCATTTAAAAACAGAGTTTGGTCCATTCTGAAGCGTTGGTATCAG  
GTTATTGGTTTAAGTGGTGATTCTCAGCTGAAAATCTCATTTCTGAAGTTGTCAGAAGGAA  
TGATGTCATCATCAGTACAGCACAGATCCTTGAGAACTCACTTTTAAATGCATCCAAGGAAG  
ATGAAGAAAGTGTCCACTTATCAGATTTTTCCCTCATCATCATCGATGAGTGTATCACACT  
CAAAAGGAAGGTGTCTACAATAATATAATGAGACGTTACTTAAAAGAAAAGATGAAGAACAG  
GAAGCTGGCAAAAGAAAACAAACCACTGATCCCACAGCCCCAGATTCTGGGACTTACAGC  
CTCACCTGGTGTAGGAAGTGCAACATCCTACTCAAAGCTGAAGAGCATATTCTGAAAATC  
TGTGCCAATCTTGATGCATGTAGAATTATGACTGTTGAAGAGCATGCCTCCCAGCTAAAGA  
ATCAGGTGAAGGAACCATCTAAGAAGACTGTGATTGCAGATGACAAAAAAGGGATCCATT  
TAAAGAGAAAATTACTGAGATCATGACAGAAATACAAAACCTATTGCCAGCTGCATCCAAGC

CTGAGTTTGGAACTCAGACATATGAACAGTGGATGATCAGAGAAGAGAAAAGAGCTGCAAA  
AGAAGAAAAACGCAGGCAACGTGTCTGTGCAGAGCACTTGAAGAAATACAATGATGCTCTC  
CAGATAAATGACACCATCCGAATGGTGGATGCCTACAATCTCCTAAATAACTTCTATAAAGA  
GGAGAAAAGTAAGAAGACAGTAAGGAGTGATGATGACGATGATGATAAACCAGCAGTATCA  
AAACAGGATGAAACAGATGAATTTCTAATAGGTTTATTTTCATGCAAAAAAGAAACAGCTGAA  
AGAGTTGACTAGAAAACCAGAAAATGAAAATCAGAAGCTCATGGAGTTGAGAAATACTTTAA  
TGGAGGAGTTCACAAAGACTGAGGAACCTCGAGGAATCATTTTCACAAAGACTCGTCTAAG  
TGCCTTTGCTCTTTTCCAGTGGATTAAGGACAACCCAAAATTTGAAGAAGTGGGAATTAAG  
GCCCATTATCTTATTGGCTCTGGACATAAGAGTGAAATGAAGCCCATGACTCAGAATGAGC  
AAAGGGAAGTAATTGATAAATTTGATGTGGAATGTAAATTTACTAATTGCTACTACTGTA  
GCTGAGGAAGGCCTGGACATCAAAGAGTGTAACATTGTTATTTCGCTATGGCCTCGTCACCA  
ATGAAATTGCCATGGTGCAGGCTCGTGGTAGAGCTCGGGCTGATGAAAGCACCTATGCTC  
TTGTTGCTTCAAGTGGCTCAGGGGCTGTTGAACGTGAAAATGTAAATATTTTTCGTGAGAAA  
ATGATGTATAAGGCCATTGAGCATGTCCAGAAGATGCCACAGGAAGAGTATTTAAATAAGA  
TTCAGAGTTTCCAGTTGCAAAGTGTAAGTGGAAAAACAAATGAAGGTGATGAGAGATCAGCG  
CAAGACATACAAGAAAAATCCTTCACTAATAAAATTTCTTATGCAAAAATTGCTCCAAGTCGAT  
ATGTTCTGGAGAAGACATACAAGTTATTGAAGACATGCATCATGTTAGTGTGAAAAAAGATT  
TCCAAAGTCTTTATCATATAAGAGAAAAATAAAACCCTGCAAGATAAGCGTGCTGATTACCAG  
ACAAATGGGGAAATTACATGCAAAGACTGTGGGCAAGCTTGGGGAAATATGATGGTTCCACC  
GAGGTCTTGACCTGCCTTGTCTAAAGATTAGAAATTTTGTGGTTGTGTTTGCAGACAAGAAA  
ACAACAAATGATATTTTTTAAGAAATGGGGAGACCTACCCATTAGGTTTCCTAGTTTTGATTAT  
GCAGCTCATTGTCCTTCAAGTGATGAAGATTAA

>eudypes\_moseleyi-mda5

ATGGCAGAGGAGTCCCGAGACGAGCGCTTCCTCTACCTGATCTCCTGCTTCAGGCCGCGG  
CTGAAGCAGTTCATCCGGGTGCAGCCGGTGCTGGACCTGCTTCCCTCGCTGAGCGCTGG  
GGAGAAGGAGAAGGTGCGGGCGGCCGCGCTGCAGCGGGGCGAGGTGGAGGGGGCGGA  
GGAGCTGCTGCGGGTCGTGAGCGGGGGCCCCGCGGGTGCGGCTGGTTCCACGAGTTC  
CTGCAGGCGCTGGAGCAAGGTGGCTGCAGCCTGGCCGCCTGCTACGTGAACCCAGCCT  
CAGCCAGCTGCCCTCGGCGGCCGAGGAGGAGGACCATGACCTCTGCGTGCATTGGTGC  
AGCTGCTCCACAGCACACTGGTGGATAGAATGCAGACCATGCAGGTGGCTGAGAAGTGCC  
TGCAGATGGGCATCTTCCAGGACGAGGACCTGGATCGGATCCACACTGTTACTGACAATC  
GTGGGAACAGAGATGGTGCAAGGGAGCTATTGAGCAGGATTGTGCAGAAGAAAGATTGGT  
TCTCTCCTTTTTTATTGCTCTGCGTGAAACCCAACATGGAGGCCTTGAGATGATTTAAGC  
GGAAATACAGGAGGAACAGAGAATAGACAAAATGAGATGAAGAACAGTACAAATGAAGAAA  
CGAAAGTTACAAGCCAACCAGGATATGCCATAGTGGAGGATCTGAAACAGCAAGAAAATGT  
GAATGATAGTTTCAGCAGTGAGAACAGTGTATCGGAAACATCTATTGGAAAGAATTCTATAG  
TTTCAGAGTCCGATGTCTCCACAGGAGATGGAAGTGTCAGTAACTCGAATGAAAACCTGGG  
ACAGAGCTGCACAACCAGTGATTCAGATGAAGATGAAGTGGAGAGTAGAGCTTCACCTGA  
GCCAGATCTGATCCTGAGAGATTACCAGATGGAAGTTGCAAAGCCAGCACTGAATGGGGA  
GAATATTATAATATGTCTCCCTACAGGCAGTGGTAAAACCAGAGTGGCTGTTTACATTACCA  
AAGATCACTTGGATAAGAAGAAAAGAGCATCAGAGCCTGGAAGTTATAGTACTTGTTAAT  
AAGGTACCATTGGTAGAACAGCATTTACGAAAGGAGTTTAAATCCATTCCCTGAAGCGTTGGT  
ATCAGGTTATTGGTTTAAAGTGGTGATTCTCAGCTGAAAATCTCATTTCCCTGAAGTTGTCAGT  
AGAAATGATGTCATCATCAGTACAGCACAGATCCTTGAGAATTCACTATTAAATGCAGCCGA

AGAAGATGAAGAAGGTGTCCACTTATCAGATTTTTCTACTCATCATTATCGATGAGTGTGATC  
ACACTCAAAGGAAGGTGTCTACAACAATATAATGCGACGTTACTTAAAAGAAAAGATGAAG  
AACAGGAAGCTGGCAAAGAAAACAAACCACTGATCCACAGCCTCAGATTCTGGGACTTA  
CAGCCTCACCTGGTGTAGGAGGTGCAACATCCTACTCAAAGCTGAAGAACATATTCTGAA  
AATCTGTGCCAATCTTGATGCATTTAGAATCATGACTGTTGAAGAGCATGCCTCCCAGTTGA  
AGAATCAGGTGAAGGAACCGTATAAGAAGACGGTGATTGCGGATGACAAAAGAAGAGATC  
CATTTAGAGAGAGAATTACTGAGATCATGACAGACATTCAAACCTATTGCCAGCTCCATCCA  
AAATCTGAGTTTGGAACCTCAGACATATGAACAGTGGGTGATTAGAGAAGAGAGAAAAGCTG  
CAAAGAAGAAAAACGCAAGGAACGTGTCTGTGCAGAACACTTGAAGAAATACAATGATGC  
TCTCCAGATAAATGACACCATCCGAATGGTGGATGCGTACAATCACCTAAATAACTTTTATA  
AGGAGGAGAAAAGTAAGAAAACAGTAAGGAGTGATGATGATGATGATGAACCAGCAG  
TATCAAACAGGATGAAACAGATGAATTTCTAATAGGTTTATTTTCATGCAAAAAGAAGCAG  
CTGAAAGAATTGGCTAGAAAGCCAGAATACGAAAATGAGAAGCTAATACAGTTGCGAAAGA  
CTCTGATGGAGGAGTTCACGAAGACTGAGGAACCTAGAGGAATTATTTTCACAAAGACTCG  
GCTAAGTGCCCTTGCTCTATTGCAGTGGATTAAGGATAACCCAAAATTTGAAGAAGTGGGA  
ATTAAGGCCAGTTATCTTATTGGTGGTGGACATAACAGTGAAATTAACCCATGACTCAGAA  
TGAGCAAAGGGAAGTTATTGACAAATTCCGAGGTGGAAATGTAAATTTACTTATTGCTACTA  
CTGTAGCTGAGGAAGGCCTAGACATCAAAGAGTGTAACATCGTTATTCGCTATGGCCTCGT  
CACCAATGAAATTGCTATGGTGCAGGCTCGTGGTCGAGCTCGAGCTGATGAGAGCACCTA  
TGCACTTGTGGCTTCGAGTGGCTCAGGAGCTGTTGAACGTGAAGATGTTAATATTTTCCGT  
GAGAAAATGATGTATAAGGCCATTCAGCGTGTCCAGAAGATGCCGCAGGAAGAGTATTTAA  
ATAAGATACAGAATTTCCAGTTGCAAAGTATAGTGGAACAAATGAAGGCCAAGAGAGA  
TCGGCACAAGACATACAAGAAAAATCCTTCACTAATAACATTCCTATGCAAAAATTGCCACA  
AGCTGGTATGTTCTGGAGAAGACATACAAGTTATTGAAAACATGCATCATGTGAGTGTGAAA  
AAAGATTTCCAAAGTCTTTACCATACAAGAGAAAATAAGACACTGCAAGATAAGCATGCCGA  
TTACCAGACAAATGGGGAAATTATATGTAAAGATTGTGGACAAGCTTGGGGAAATATGATG  
GTTACCGAGGCCTTGACCTGCCTTGTCTAAAGATTAGAAATTTTGTGGTTGTGTTTGAAGA  
CAAGAAAACAACAAAGCATATTTTAAAGAAATGGGGAGAACTGCCCCTCAGGTTCCCTAGT  
TTTGATTATGCAGCTCATTGTCCTTCAAGTGATGAAGATTAA

>eudypula\_minor-mda5

ATGGCAGAGGAATCCCGAGACGAGCGCTTCCTCTACTTGATCTCCTGCTTCAGGCCGCGG  
CTGAAGCAGTTCATCCGGGTGCAGCCGGTGCTGGACCTGCTTCCCTCGCTGAGCGCTGG  
GGAGAGGGAGAAGGTGCGGGCGGCCGCGCTGCAGCGGGGCGAGGTGGAGGGGGCGGA  
GGAGCTGCTGCGGGTCTGTCGAGCGGGGGCCCCGCGGGTGCGGCTGGTTCCACGAGTTC  
CTGCAGGCGCTGGAGCAAGGTGGCTGCAGCCTGGCCGCTGCTACGTGAATCCCAGCCT  
CAGCCAGCTGCCCTCGGCGGCCGAGGAGGAGGACCATGACCTCTGCGTGCACTTGGTGC  
AGCTGCTCCACAGCACACTGGTGGATAGAATGCAGACCATGCAGGTGGCTGAGAAATGCC  
TGCAGATGGGTATCTTCCAGGACGAGGACCTGGATCGGATCCCACTGTTACTGACAATC  
GTGGGAACAGAGATGGTGCAAGGGAGCTATTGAGCAGGATTGTGCAGAAGAAAGATTGGT  
TCTCTCCTTTTTTATTGCTCTGCGTGAAACCCAGCATGGAGGCCTTGCAAGATGATTTAAG  
CGGAAATACAGGAGGAACAGAGAATAGACAAAATGAGATGAAGAACAGTACAAATGAAGAA  
ACGGAAGTTACAAGCCAACCAGGATATGCCATAGTGGAGGATCTGAAACAGCAAGAAAAT  
GTGAATGATAGTTTTCAGCAGTGAGAACAGTGTATTGGAAACATCTATTGGAAAGAATTCTAT  
AGTTTCAGAGTCAGATGTCTCCACAGGAGATGGAAGTGTGAGTAACTCGAATGAAAACCTG



GGACAGAGCTGCACAACCAGTGATTCAGATGAAGATGAAGTGGAGAGTAGAGCTTCACCT  
GAGCCAGATCTGATCCTGAGAGATTACCAGATGGAAGTTGCAAAGCCAGCACTGAATGGG  
GAGAATATTATAATATGTCTCCCTACAGGCAGTGGTAAAACCAGAGTGGCTGTTTACATTAC  
CAAAGATCACTTGGATAAGAAGAAAAGAGCATCAGAGCCTGGAAAAGTTATAGTACTTGTT  
AATAAGGTACCATTGGTAGAACAGCATTTACGAAAGGAGTTTAATCCATTCCCTGAAGCGTTG  
GTATCAGGTTATTGGTTTAAGTGGTGATTCTCAGCTGAAAATCTCATTTCCCTGAAGTTGTCA  
GTAGAAATGATGTCATCATCAGTACAGCACAGATCCTTGAGAATTCAGTGTTAAATGCAGCC  
GAAGAAGATGAAGAAGGTGTCCACTTATCAGATTTTTCACTCATCATTATCGATGAGTGTCA  
TCACACTCAAAGGAAGGTGTCTACAACAATATAATGCGACGTTACTTAAAAGAAAAGATGA  
AGAACAGGAAGCTGGCAAAGAAAACAAACCACTGATCCACAGCCTCAGATTCTGGGAC  
TTACAGCCTCACCTGGTGTAGGAGGTGCAACATCCTATTCAAAGCTGAAGAACATATTCT  
GAAAATCTGTGCCAATCTTGATGCATTTAGAATCATGACTGTTGAAGAGCATGCCTCCCAGT  
TGAAGAATCAGGTGAAGGAACCGTATAAGAAGACGGTGATTGCAGATGACAAAAGAAGAG  
ATCCATTTAGAGAGAGAATTACTGAGATCATGACAGACATTCAAACCTATTGCCAGCTCCAT  
CCAAAATCTGAGTTTGGAAGTCAAGACATATGAACAGTGGGTGATTAGAGAAGAGAGAAAAG  
CTGCAAAGAAAGAAAAACGCAAGGAACGTGTCTGTGCAGAACACCTGAAGAAATACAATGA  
TGCTCTCCAGATAAATGACACCATCCGAATGGTGGATGCATACAATCACCTAAATAACTTTT  
ATAAGGAGGAGAAAAAGTAAGAAAACAGTAAGGAGTGATGATGATGATGATGATGAACCAGC  
AGTATCAAACAGGATGAAACAGATGAATTTCTAATAGGTTTATTTTCATGCAAAAAAGAAGC  
AGCTGAAAGAATTGGCTAGAAAGCCAGAATACGAAAATGAGAAGCTAATACAGTTGCGAAA  
GACTCTGATGGAGGAGTTCACGAAGACTGAGGAACCTAGAGGAATTATTTTCACAAAGACT  
CGGCTAAGTGCCCTTGCTCTATTGCAGTGGATTAAGGATAACCCAAAATTTGAAGAAGTGG  
GAATTAAGGCCAGTTATCTTATTGGTGCTGGACATAACAGTGAAATTAACCCATGACTCAG  
AATGAGCAAAGGGAAGTTATTGACAAATCCGAGGTGGAAATGTAAATTTACTTATTGCTAC  
TACTGTAGCTGAGGAAGGCCTAGACATCAAGGAGTGTAACATCGTTATTTCGCTATGGCCTC  
GTCACCAATGAAATTGCTATGGTGCAGGCTCGTGGTGCAGCTCGAGCTGACGAGAGCACC  
TATGCACTTGTGGCTTCGAGTGGCTCAGGAGCTGTTGAACGTGAAGATGTTAATATTTTCC  
GTGAGAAAATGATGTATAAGGCCATTACAGCGTGCCAGAGGATGCCGCAGGAAGAGTATTT  
AAATAAGATACAGAATTTCCAGTTGCAAAGTATAGTGGAAAAACAAATGAAGGCCAAAGAGA  
GATCGGCACAAGACATACAAGAAAAATCCTTCACTAATAACATTCCTATGCAAAAATTGCCA  
CAAGCTGGTATGTTCTGGAGAAGACATACAAGTTATTGAAAACATGCATCATGTCAGTGTG  
AAAAAAGATTTCCAAAGTCTTTACCATACAAGAGAAAATAAGACACTGCAAGATAAGCATGC  
CGATTACCAGACAAATGGGGAAATTATATGTAAAGATTGTGGACAAGCTTGGGGAAATATG  
ATGGTTCACCGAGGCCCTTGACTTGCCCTGTCTAAAGATTAGAAATTTTGTGGTTGTGTTGA  
AGACAAGAAAACAACAAAGCATATTTTTAAGAAATGGGGAGAACTGCCTGTCAGGTTCCCT  
AGTTTTGATTATGCAGCTCATTGTCCTTCAAGTGATGAAGATTAA

>eupsittula\_pertinax-mda5

ATGGCAGAGGAGTTGCGAGACGAGCGGTTCTCTACATGATCTCGTGCTTCAGGCCGCGG  
CTGAAGCAGTTCATCCGAGTGACAGCCGGTGCTGGACCGGCTCCCTTCGCTCAGCGCGGA  
CGACAGGGAGAAGGTGCGGGCGGGCCGCGCTGCAGCGGGGCGAGGTGGAAGGGGCGGA  
GGAGCTGCTGCGGGCCGTGGAGCGGGGGCCCCGCGGGTGTGGCTGGTTCCACGAGTTC  
TTGCAGGCGCTGGAGCACGGCGGCTGTGGCATGGCCGCTTGCTACGTGAACCCAGCCT  
CAGCCAGCTGCCCTCGCCGGCTGAGGAGGCCGACCACGACCTCTGCGTGCATTTGGTGC  
AGCTGCTCCATAGCACGCTCGTGGATAGTATGCGGACCGTGACAGGTGGCCGAGAAGTGC

CTGCAGATGGGCATCTTCCAGGATGAGGACCTGGATGGGATCCATACTGTTACTGACAATC  
GTGGGAACAGAGAAGGTGCAAGGGAGCTATTGAGCAGATTAGTGCAGAAGAAAGATTGGT  
TCTCTCGGTTTTTGATTGCTTTGCGTGAAACCCAACATGGAGGCCTTGCAGATGATTTAAGT  
GGAAATACAGGAGGAACAAAGGATAAACAAAATGGGATGAAGAACAGTACAAACAAAGAAA  
TAGAAGTTACAAGCCAACCAGGTTATGCCATACTGGAGGATTTGAAGCAGCAGGAAAATAT  
GAATGATAGTTTTAGCAGTGAAGAACAATTTATTGGAAACATCTATTGGAAAGAATTCTTTAG  
TTTCAGAGTCAGATGTCTCTATAGGATTTGGAAGTGTGAGTAACTTGAATGAAAACCTGGGA  
CAGAGCTGCACAAGCAGTGATTGAGATGAAGAGGAGAGCAGAGCTTCACCTGAGCCAGAT  
CTGGTCCTGAGAGATTACCAGATGGAAGTTGCAAAGCCAGCACTGAATGGGGAGAATATTA  
TAATATGTCTCCCTACAGGCAGTGGTAAAACCAGAGTGGCTGTTTACATTACCAAAGATCAT  
TTGGATAAAAAGAAAAGAGCATCAGAGCCTGGAAAAGTTATAGTCCTTGTTAATAAGGTACC  
ATTGGTAGAACAGCATTACGAAAGGAGTTTAGTCCATTCCCTGAAGCGCTGGTATCACATTA  
TTGGTTTAAAGTGGTGATTCTCAGCTGAAAATATCATTTCCTGAAGTTGTCAGAAGAAATGAT  
GTCATCATCTGTACAGCACAGATCCTTGAGAATTCAGTCTAAATGCAGACAAAGAAGATG  
AAGAAGGTGTCCACTTATCAGATTTTTCTACTCATCATTATTGATGAGTGTGATCACACTCAA  
AAGGAAGGTGTCTACAACAACATAATGCGACGTTACTTAAAAGAAAAGAAGAAGAACAGGA  
AGCTGGCAAAAAGAAAACAAACCACTGATCCCGCAGCCTCAGATTCTGGGACTTACAGCCTC  
ACCTGGTGTAGGAGGTGCAACATCCTATTCCAAAGCTGAAGAACATATTCTGAAAATCTGT  
GCTAATCTTGATGCATGTAGAATCATGACTGTTGAGGAGCATGCCTCCCAGCTGAAGAATC  
AGGTGAAGGAACCTTTTAAGAAGACTGTGATTGCAGATGACAAAAAAAGGATCCATTTAG  
AGAGAGAGTAACTGAGATCATGACAGAGATTCAAAACTATTGCCAGCTTCATCCAAAATCT  
GAGTTTGGAACCTCAGCCATATGAGCAGTGGGTGATTAGAGAAGAGAAAAAGCTGCAAAA  
GAAGAAAAACGCAAGGAACGTGTCTGTGCAGAACACCTGAAGAAATACAATGATGCTCTCC  
AGATAAATGATACCATCCGAATGGTAGATGCGTACAATCACCTGAATAACTTTTATAAGGAT  
GAGAAAAAGTAAGAAGACAGAAAGGAGTGATGATGATGACGATGCACCAGCAGTATCAAAA  
CAGGATGAAACAGATTTATTTCTAATAGGTTTATTTTCATGCAAAAAAGAAACAGCTGAAAGA  
GTTGGCTAGAATGCCAGAATATGAAAATGAAAAGCTAACACAGTTGCGAAACACTTTAATG  
GAGGAGTTACGAAGACTGAGGCACCTAGAGGAATTATTTTACAAAGACCCGGCTAAGT  
GCTTTTGCCCTATTCCAGTGGATTAAGGATAACCCAAAATTTGAAGAAGTGGGAATTAAGG  
CCCATTATCTTATTGTTCTGGACATAACAGTGAAATGAAACCCATGACGCAGAATGAGCA  
GCGGGAAGTTATTGATAAATCCGAGGTGGAAATTTGAATTTACTTATTGCTACTACTGTAG  
CTGAGGAAGGCCTAGACATCAAAGAGTGTAACATTGTTATTTCGCTATGGCCTCGTCACCAA  
TGAAATTGCTATGGTGCAGGCTCGTGGTCGAGCTCGAGCTGATGACAGCACCTATGCACT  
TGTGGCTTCGAGTGGCTCAGGAGCTGTTGAACGTGAAGATGTTAATATTTTCCGTGAGAAA  
ATGATGTATAAAGCCATTACGCATGTCCAGAAGATGCCACAGGAGGAGTATTTAAAGAAGA  
TTCAGAATTACCAGTGTCAAAGTATAGTGGAAAAAGAAATGAAGGCAAAGAGACATCAGCA  
CAAGACATACAAGAAAAATCCTTCACTAATATCATTCCCTATGCAAAAATTGCCACAAGCTGG  
TATGTTCTGGGGAAGATATACGAGTTATTGAAAACATGCATCATGTCAGTGTGAAAAGAGAT  
TTCCAAAGTCTTTACCATACAAGAGAAAATAAGACGCTGCAAGATAAGAATGCTGATGACCA  
GACAAATGGAGAAGTTATATGTAAAGATTGTGGACAAGTTTGGGGAATATGATGGTTCAC  
CGAGGTCTTGATCTGCCTTGTCTAAAGATTATAAATTTTGTGATTGTGTTTGAAGACAAGAA  
AACAAGAAAAGAAATTTTAAAGAAATGGAGAGAGCTGCCCATCAAGTTCCTGGTTTTGATT  
ATGCAGCTCATTGTCCTTCAAGTGATGAAGATTAA

>falco\_peregrinus-mda5

ATGGCAGGGGAGTCCCGGGACGAGCGGTTCTCTACCTCATCTCCTGCTTCAGGCCGCG  
GCTGAAGCAGTTCATCCGGGTGCAGCCGGTGCTGGACCAGCTGCCCTCGCTGAGCGCGG  
AGGAGAGGGAGAAGGTGCGGGCGGCCGCGCTGCAGCGGGGCGAGGTGGCGGGGGCGG  
AGGAGCTGCTGCGGGCCGTGGAGCGGGGCCCCCGCGGTTGCGGCTGGTTTCACGAGTT  
CCTGCAGGCGCTGGAGCACGGCGGCTGCAGCCTGGCCGCCTGCTACGTGAACCCCAGCC  
TCAGCCACCTGCCGTGCGCGGCCGAGGAGGCCGACCACGACCTCTGCGTGCACCTTGGTG  
CAGCTGCTCCACGGCACGCTGGTGGATAGAATGCAGACCATGCAGGTGGCCGAGAAGTG  
CCTGCAGAAGGGCATCTTCCAGGATGAGGACCTGGATCGGATCCAGACTGTTACTGACAA  
TCGTGGGAACAGAGATGGTGCAAGGGAGCTACTGAGCAGAATAGTGCAGAAGAAAGATTG  
GTTCTCACCTTTTTTGGTTGCTCTGCGTGAAACCCAACATGGAGACCTTGCAGATGATTTAA  
GCGGAAATACAGGAGGAAGAGAGAATACACAAAATGAGATGAAAAGCAGTACAAATGAAG  
AAACGGAAATTAAGGCCAACCCAGGATATGCTGAAATGGAGAATCTGAAACAGCAAGAAAA  
TACGAATGATAGTTTCAGCAGTGAGAACTGTGTATTGAAACATCCATTGAAAGGATTCT  
GTAGTTTCAGAGTCCGATGTCTCCATAGGAGATGGAAGGTTCCGTAACCTTGAATGAAAACC  
TGGGACAGAGCTGTACAACCACTGATTCAGATGAAGATGAAATGGAGAGCAGAGCTTCAC  
CTGAGCCAGAAATGATCCTGAGAGATTACCAGATGGAAGTTGCAAAGCCAGCACTGAATG  
GGGAGAATATTATAATATGTCTCCCTACAGGCAGTGGTAAAACCAGAGTGGCTGTTTACAT  
TACCAAAGATCACTTGGATAAGAAGAAAAGAGCATCAGAGCTTGGAAAAGTTATAGTACTT  
GTTAATAAGGTACCATTGGTAGAACAGCATTTACGAAAGGAGTTTAATCCATTCTGAAGCG  
TTGGTATCAGGTTATTGGTTTAAGTGGTGATTCTCAGCTGAAAATCTCATTTCTGAAGTTG  
TCAGAAGGAATGATGTCATCATCAGTACAGCACAGATCCTTGAGAATTCAGTGTTAAATGCA  
GCTGAAGAAGATGAAGAAGGTGTTCACTTATCAGATTTTTCACTCATCATTATTGATGAGTG  
TCATCATACTCAAAGGAGGGTGTCTACAACGATATAATGCGACGTTACTTAAAAGAAAAGA  
TGAAGAACAGGAAGCTGGCAAAAGAAAACAAACCACTGATCCCACAGCCTCAGATTCTGG  
GACTTACAGCCTCACCTGGTGTAGGAGGTGCAACATCCTACTCAAAGCTGAAGAGCATAT  
TCTGAAAATCTGTGCCAACCTTGATGCATGCAGAATCATGACTGTTGAAGAGCATGTCTCC  
CAGTTGAAGAATCAGGTGAAGGAACCATATAAGAAGACTGTGATTGCAGATGACAAAAGAA  
GGGATCCATTTAGAGAGAGAATTACTGAGATCATGACAGACATTCAAACCTATTGCCAGCT  
CTATCCAAAATCTGAGTTTGGAACTCAGCCATATGAACAGTGGGTGGTTAGAGAAGAGAAA  
AAAGCTGCAAAAGAAGAAAAACGTAAGGAGCGTGTCTGTGCAGAGCACTTGAAGAAATACA  
ATGATGCTCTCCAGATAAATGACACTATCCGAATGGTAGATGCGTACAATCATCTAAATAAC  
TTCTATAAGGAGGAGAAAAGTAAGAAGACAGTAAGGAGCGATGATGATGATGATGATGAAC  
CAGCAGTATCAAACAGGATGAAACAGATGAATTTCTAATAGGTTTATTTTCATGCAAAAAAG  
AAACAGCTGAAAGAGTTGGCTAGAAAGCCAGAATATGAAAATGAGAAGCTAATACAGTTGC  
GAAACACTTTAATGGAGGAGTTCACGAAGACTAAGGAACCTAGAGGAATTATTTTCACAAA  
GACTCGGCTAAGTGCCGTTGCTCTGTTCCAGTGGATTAAGGATAACCCAAAATTTGAAGAA  
GTGGGAATTAAGCCCATTACCTTATTGGTGCTGGACATAACAGTGAAATGAAACCCATGA  
CTCAGAATGAGCAAAGGGAAGTTATTGATAAATTCCGAGGTGGAAATGTAAATTTACTTATT  
GCTACTACTGTAGCTGAGGAGGGCCTAGACATCAAAGAGTGTAACATCGTTATTTCGCTATG  
GCCTTGTCACCAATGAAATTGCTATGGTGCAGGCTCGTGGTTCGAGCTCGAGCTGATGAGA  
GCACCTATGCACTTGTGGCTTCCAGTGGCTCAGGAGCTGTTGAACGTGAAGATGTTAATAT  
TTTCCGTGAGAAAATGATGTATAAGGCCATTACGCGTGTCCAGAAGATGCCACAGGAGGA  
GTATTTGAATAAGATTGAGAATTTCCAGTTGCAAAGTATAGTGGAAAAACAAATGAAGGCCAA  
AAAGAGATCAGTGCAAAATATACAAGAAAAATCCTTCACTAATAACATTCCTATGCAAAAATT

GCCACAAGCTGATATGTTCTGGAGAAGACATCCAAGTTATTGAAAAAATGCATCATGTCAGT  
GTGAAAAATGATTTCCAAAGTCTTTACCATACAAGAGAAAAATAAGACACTGCAAGATAAGCA  
TGCCGATTACCAGACAAATGGGGAAATAATATGTAAAGATTGTGGACAAGCTTGGGGAAAT  
ATGATGGTTCACCGAGGTCTTGACCTACCTTGTCTAAAGATTAGAAATTTTGTGGTTGTGTT  
TGAAGACAAGAAAACAACAAAGAACATTTTTAAGAAATGGGGAGAACTGCCTGTCACATTC  
CCTACTTTTGATTATGCAGCTCATTGTCCTTCAAGTGATGAAGATTAA

>ficedula\_albicollis-mda5

ATGGCAGAGGGCACCCGGGACGAGCGGTTCTCTACATGATCTCGTGCTTCAGGCCGCG  
GCTGAAGCAGTTCATCCAGGTGCAGCCCGTGCTGGACCGGCTGCCCTCGCTGAGCGCCG  
AGGACAGGGACAGGGTGCGGGCGGCCGCCGAGCAGCGCGGCGCGGCGGGCGCGG  
AGGAGCTGCTGCGGGCCCTGGAGCGCGGGCCCCGCGGCCGCGGCCGCCCCCGCGAGTT  
CCTGCAGGCGCTGGAGCAGGGCGGCTGCGGCCTGGCCGCTGCTACGCCAACCCACGC  
CTGAGCCTGCTGCCCTCGCCGGCCAGGAGGCCGAGCACGACCTGTGCGTGACAGCTGGT  
GCAGCTCCTGCACGGCACGCTGGTGGACAGGATGCGCGCCCTGCAGGTGGCCGGGAAG  
TGCCTGGAGATGGGAATCTTCCAGGACGAGGACATGGATCGGATCCAGACTGTTACTGAC  
AATCGTGGCAACAGAGATGGTGAAGGGAGCTACTGAGCAGAATAGTCCAGAAGAAAGAT  
TGGTTCTCTTCTTTTTGGTTGCTCTCCGTGAAACCCAACATGAAGACCTCGCATGTGATTT  
AAGTGGAAATACAGGAGGAACAGAGAATAAACAAAAATGGGATGGAGCAGACTACAGATGA  
AGAAACAGAAGTTACAAGTCAACCAGGATATGTCATAGAGCAGAATTTGAAACAGGAAGAA  
AATGTGGATGATAGTTTCAGCAGTGAGAGCAGTGTGTTGAAACATCCATAGAAAAGAATT  
CTGTGGTGTGAGAGTCAGATGTCTCCGTAGGCGATGGAAGTGTGAGTAACCTGAATGAAAG  
CCTGGGACAGAGCTACACAACCAAGTGATTCAGATGAAGAGGAGAGGAGAGCCTCACCTGA  
GCCAGATCTGACCCTGAGAGATTACCAGATGGAAGTTGCAAAGCCAGCACTGAATGGAGA  
GAATATTATAATATGTCTCCCTACGGGCAGTGGTAAACTAGAGTGGCTGTTTACATTACCA  
AAGATCACTTGGATAAGAAGAAAAGAGCATCAGAGCCTGGAAAAGTCATAGTACTTGTTAA  
TAAGGTTCCATTGGTAGAACAGCATTACAAAGAGAGTTTAGTCCATTCTGAAGCGTTGGT  
ATCAGGTTACTGGTTTAAGTGGTGATTCTCAGCTGAAAATCTCATTTCTGAAGTTGTCAGA  
AGAAATGATGTCATCATCAGTACAGCTCAGATCCTTGAGAATTCAGTTAAATGCATCCAA  
GGAAGAGGAAGAAAGTGTCCACTTATCAGATTTTTCCCTCATCATTATTGATGAATGTCATC  
ACACTCAAAGGAAGGTGTCTATAACAATATAATGCGACGTTACTTAAAAGAAAAGATGAAG  
AACAGGAAGCTGGCAAAAGAAAACAAACCACTGATTCCACAGCCTCAGATTCTGGGACTTA  
CAGCCTCACCTGGTGTAGGAGGTGCAACATCCTACTCAAAGCTGAAGAGCATATTCTGAA  
AATCTGTGCCAATCTTGATGCATGTAGAATTATGACTGTTGAAGAGCATGCCCCCAGCTA  
AAGAATCAGGTGAAGGAACCATCTAAGAAGACTGTGATTGCAGATGACAAAAAAGGGATC  
CATTTAAAGAGAGAATTATTGACATCATGACAGAAATACAAAACCTATTGCCAGCTACATCCA  
AAGTCTGAGTTTGGAACCTCAGACATACGAACAGTGGGTGATGAGAGAAGAGAGAAGAGCT  
GCAAAAGAAGAAAAACGCAGGGAACGTGTCTGTGCGGAACACTTGAAGAAATACAATGAT  
GCTCTCCAGATAAATGACACCATCCGAATGGTGGATGCCTACAATCACCTAAATAACTTTTA  
TAAAGAGGAGAAAAGTAAGAAGACAGTAAGGAGTGATGATGATGATGATGAACCAGCA  
GTGTCAAAACAGGATGAAACAGATGAATTTCTATTAGATTTATTTTCATGCAAGAAAGAAACA  
GCTGAAAGAGTTGACTGGAAAGCCAGAAAATGAAAATGAGAAGCTAATAAAGTTGAGAAAC  
ACTTTAATGGAGGAGTTCACAAAGACTGAGGAACCTCGAGGAATCATTTTCACAAAGACTC  
GTCTAAGTGCCTTTGCTCTATTCCAGTGGATTAAGGACAACCCAAAATTTGAAGAAGTGGG  
AATTAGGGCCCATTATCTTATTGGCTCTGGACACAAGAGTGAAATGAAGCCCATGACTCAG

AATGAGCAAAGGGAAGTTATTGATAAATTTTCGACATGGAAATATAAATTTACTAATTGCTACT  
ACTGTAGCTGAGGAAGGCCTGGACATCAAAGAGTGTAACATCGTTATTCGCTATGGCCTCG  
TCACCAATGAAATTGCTATGGTGCAGGCTCGCGGTAGAGCTCGGTCTGATGAAAGTACCTA  
TGCTCTTGTGGCTTCAAGGGGCTCAGGGGCTGTTGAACGTGAAGATGTTAATATTTATCGT  
GAGAAAATGATGTACAAGGCCATTCAGCGTGTCCAGAAGATGCCACAGGAAGAGTATTTAA  
ATAAGATTCAGAGTTTCCAGTTGCAAAGTATAGTGGA AAAACAAATGAAGACAAAGAGAGAT  
CAGTGCAAGACATACAAGAAAAATCCTTCACTAATAAAATTCTTATGCAAAAATTGCTACAA  
GCCGATATGTTCTGGAGAAGACATACAAGTTATTGAAGACATGCATCATATCAGTGTGAAAA  
AAGATTTCCAACTCTTTATCATACAAGAGAAAAATAAAACGCTGCAAGATAAGCATGCTGAT  
TACCAGACAAATGGGGAAATTATATGCAAAGACTGTGGACAAGCTTGGGGAAATATGATGA  
TTCACCGAGGTCTTGACCTGCCTTGTCTAAAGATTAAAAATTTTGTGGTTGTGTTTGCAGAC  
AAGAAAACAACAAAGCAAATTTTTAAGAAATGGGGGGAGCTGCCCATCAGGTTTCCTAGTT  
TTGATTATGCAGCTCATTTTCCTTCAAGTGATGAAGATTAA

>fregetta\_grallaria-md5

ATGGCAGAGGCGTCCCGAGACGAGCGCTTCCTCTACTTGATCTCCTGCTTCAGGCCGCGG  
CTGAAGCAGTTCATCCGGGTGCAGCCGGTGTCTGGACCGGCTTCCTCGCTGAGCGCAGA  
GGAGAGGGAGAGGGTGCGGGCGATCGCCCTGCAGCGGGGCGAGGTGGAGGGGGCGGG  
GGAGCTGCTGCGGGCCGTGGAGCGGGGGCCCCGCGGGTGCGGCTGTTCCACGAATTC  
CTGCAGGCGCTGGAGTACGGCGGCTGCAGCTTGGCTACCTGCTACGTGAACCCTAGCCT  
CAGCCAGCTGCCCTCGCCGGCCGAGGAGGCCGACCACGACCTCTGCGTGCACCTGGTG  
AGCTGCTCCACAGCACACTGGTGGATAAAATGCAGACCATGCAGGTGGCCGAGAAGTGCC  
TGCAGATGGGCATCTTCCAGGATGAGGACCTGGATCGGATCCCACTGTTACTGACAATC  
GTGGGAACAGAGAAGGTGCAAGGGAGCTATTGAGCAGAATAGTGCAAGAAGAAAGATTGGT  
TCTCTCCTTTTTTGGATTGCTCTGCGTGAAACCCAACATGGAGGCCTTGCAGATGATTTAAGT  
GGAAATACAGGAGGAACAGAGAATACACAAAATGGGATGAAGAACAGTACAAACGAAGAA  
ACAGAAGTTACAAACCAACCAGGATATGCCGTAGTGGAGGATTTGAAACAACAAGAAAATA  
TGAATGATAGTTTCAGCAGTGAGAACAGTTTATTGGAAGCATCTGTTGGAAAGAATTCTGTA  
GTTTCAGAGTCAGATGTCTCCATAGGAGATGGAAGTGTGAGTAACTTGAATGAAAACCTGG  
GACAGAGCTGCACAACCAGTGATTCAGATGAAGATGAAGTGGAGAGCAGAGCTTCACCTG  
AGCCAGATCTGATCCTGAGAGATTACCAGATGGAAGTTGCAAAGCCAGCATTGAATGGGG  
AAAATATTATAATATGTCTTCTACAGGCAGTGGTAAAACCAGAGTGGCTGTTTACATTACC  
AAAGATCACCTGGATAAGAAGAAAAGAGCATCAGAGCCTGGAAAAGTTATAGTACTTGTTA  
ATAAGGTACCGTTGGTAGAACAGCATTTACGAAAGGAGTTTAATCCATTCTGAAGCGTTG  
GTATCAGGTTATTGGTTTAAGTGGTGATTCTCAGCTGAAAATCTCATTTCTGAAGTTGTCA  
GAAGAAATGATGTCATCATCAGTACAGCACAGATCCTTGAAAATTCAGTGTTAAATGCAGCC  
GAAGAAGATGAAGAAGGCGTCCACTTATCAGATTTTTCACTCATCATTATCGATGAGTGTCA  
TCACACTCAAAGGAAGGTGTCTACAACAATATAATGAGACGTTACTTAAAAGAAAAGATGA  
AGAACAGGAAGCTGGCAAAGAAAACAAACCGCTGATCCACAGCCTCAGATTCTGGGAC  
TTACGGCCTCACCTGGTGTAGGAGGTGCAACATCCTACTTAAAAGCTGAAGAACATATTCT  
GAAAATCTGTGCCAATCTTGATGCATGTAGAATCATGACTGTTGAAGAGCATGCTTCCCAA  
CTGAAGAATCAGGTGAAGGAACCGTATAAGAAGACTGTGATTGCAGATGACAAAAGAAGG  
GATCCATTTAGAGAGAGAATTACTGAGATCATGACAGACATTCAAAGTATTGCCAGCTCTA  
TCCAAAATCTGAATTTGGAACCTAGCCATATGAACAGTGGGTGATTAGAGAAGAGAGAAGN  
NCTGCAAAGAAAGAAAAACGCAAGGAACGCGTCTGTGCAGAACACTTGAAGAAATACAATG

ATGCTCTCCAGATAAATGACACCATCCGAATGGTGGATGCGTACAATCACCTAAATAACTTT  
TATAAGGAGGAGAAAAAGTAAGAAGACAATAAGGAGTGATGATGATGATGAACCAGCAGTAT  
CAAAACAGGATGAAACAGATGAATTTCTAATAGGTTTATTTACACAAAAAAGAAACAGCTG  
AAAGAGTTGGCTAGAAGGCCAGAATATGAAAATGAGAAGCTAATACAGTTGCGAAACACTT  
TAATGGAGGAGTTCACGAAGACTGAAGAACCTAGAGGAATTATTTTCACAAAGACTCGGCT  
AAGTGCCTTTGCTCTATTCCAGTGGATTAAGGATAACCCAAAATTTGAAGAAGTGGGAATTA  
AGGCCCATTTATCTTATCGGTGCTGGACATAACAGTGAAATTAACCCATGACTCAGAACGA  
GCAAAGGGAAGTTATTGATAAATCCGAGGTGGAAATGTAAATTTACTTATTGCCACTACTG  
TAGCTGAGGAAGGCCTAGACATCAAAGAGTGTAACATCGTTATTCGCTATGGTCTCGTCAC  
CAATGAAATTGCTATGGTGCAGGCCCGCGGTGAGCTCGAGCTGATGAAAGCACCTATGC  
ACTTGTGGCTTCAAGTGGCTCAGGAGCTGTTGAACGTGAAGATGTTAATATTTTCCGTGAA  
AAAATGATGTATAAGGCCATTCAGCATGTTGAGAAGATGCCACAGGAGGAGTATTTAAGTA  
AGATTCAGAATTTCCAAGTGCAAAGTATAGTGGAACAAATGAAGGCAAAGAGAGATCA  
GCGCAAGACATACAAGAAAAATCCTTCACTAGTAACATTCCTATGCAAAAATTGCCACAAGC  
TGATATGTTCTGCAGAAGACATACAAGTTATTGAAAACATGCATCATGTCAGTGTGAAAAAA  
GATTTCCAAAGTCTTTATCATACAAGAGAAAAATAAGACACTGCAAGATAAGCATGCCGATTA  
CCAGACAAATGGAGAAATTATATGTAAAGATTGTGGACAAGCTTGGGGAAATATGATGGTT  
CACCGAGGTCTTGACCTGCCTTGTCTAAAGATTAGAAATTTTGTGGTTGTGTTTGAAGACAA  
GAAAACAACAAAGCAAATTTTTAAGAAATGGGGGGAAGTGGCCATCAGTTTTCTAGTTTTG  
ATTATGCAGCTCATTGGCCTTCAAGTGATGAAGATTAA

>fulmarus\_glacialis-mda5\_partial

NNCTGCAGCCTGGCTACCTGCTACATGAACCCAGCCTCAGCCAGCTGCCCTCGCCGGC  
CGAGGAGGCCGACCACGACCTCTGCGTGCACCTTGGTGCAGCTGCTCCACAGCACACTGG  
TGGATAAAATGCAGACCATGCAGGTGGCCGAGAAGTGCCTGCAGATGGGCATCTTCCAGG  
ACGAGGACCTGGATCAGATCCACACTGTTACTGACAATCGTGGGAACAGAGATGGTGCAA  
GGGAGCTATTGAGCAGAATAGTGCAGAAGAAAGATTGGTTCTCTACTTTTTTGATTGCTCTG  
CGTGAAACCCAACATGGAGGCCTTGCAGATGATTTAAGCGGAAATACAGGAGGAACAGAG  
AATAGACAAAATGGGATGAAGAACAGTACAAACGAAGAAACAGAAGTTACAAGCCAACAG  
GATATGCCATAGTGGAGGATTTGAAACAGCAAGAAAATGTGAATGATAGTTTCAGCAGTGA  
GAATAGTGTATTGGAAGCATCTATTGAAAGAATTCTGTAGTTTCAGAATTAGATGTCTCCA  
TAGGAGATGGAAGTGTCAAGTAACCTGAATGAAACGCTGGGACAGAGCTGCACAACCAGTG  
ATTCAGATGAAGATGAAGTGGAGAGCAGAGCTTCACCTGAGCCAGATCTGATCCTGAGAG  
ATTACCAGATGGAAGTTGCAAAGCCAGCATTGAATGGGGAGAATATTATAATATGTCTCCCT  
ACAGGCAGTGGTAAAACCAGAGTGGCTGTTTACATTACCAAAGATCACCTGGATAAGAAGA  
AAAGAGCATCAGAGCCTGGAAGTTATAGTACTTGTTAATAAGGTACCGTTGGTAGAACA  
ACATTTACGAAAGGAGTTTAATCCATTCCTGAAGCGTTGGTATCAGGTTATTGGTTTAAGTG  
GTGATTCTCAGCTGAAAATCTCATTTCTGAAGTTGTCAGAAGAAATGATGTCATCATCAGT  
ACAGCACAGATCCTTGAGAATTCAGTGTAAATGCAGCCGAAGAAGATGAAGAAGGTGTCC  
ACTTATCAGATTTTTCACTTATCATTATTGATGAGTGTATCACACTCAAAGGAAGGTGTCT  
ACAACAATATAATGCGACGTTACTTAAAAGAAAAGATGAAGAACAGGAAGCTGGCAAAAAGA  
AAACAAACCACTGATCCCACAGCCTCAGATTCTGGGACTTACAGCCTCACCTGGTGTAGGA  
GGTGCAACATCCTACTCAAAGCAGAAGAACATATTCTGAAAATTTGTGCCAATCTTGATGC  
ATGTAGAATCATGACTGTTGAAGAGCATGCCTCCCAACTGAAGAATCAGGTGAAGGAACCG  
TATAAGAAGACTGTGATTGCAGATGACAAAAGAAGGGATCCATTTAGAGAGAGAATTACTA

AGATCATGACAGACATTCAAAACTATTGCCAGCTCCATCCAAAATCTGAGTTTGGAACTCAG  
CCATATGAACAGTGGGTGATTAGAGAAGAGAGAAGAGCTGCAAAAGAAGAAAAACGCAAG  
GAACGTGTCTGTGCAGAACACTTGAAGAAATACAATGATGCTCTCCAGATAAATGATACCAT  
CCGAATGGTGGATGCGTACAATCACCTAAGTAACTTTTATAAGGAGGAGAAAAAGTAAGAAG  
ACAGTAAGGAGTGATGATGATGATGAACCAGCAGTATCAAAACAGGATGAAACAGATGAAT  
TTCTAATAAATTTATTTCAATTCAAAAAAGAAACAGCTGAAAGAGTTGGCTAGAAAGCCAGAA  
TATGAAAATGAGAAGCTAATACAGTTGCGAAACACTTTAATGGAGGAGTTCACGAAGACTG  
AGGAACCTAGAGGAATTATTTTCACAAAGACTCGGCTAAGTGCCCTTGCTCTATTCCAATGG  
ATTAAGGATAACCCAAAATTTGAAGAAGTGGGAATTAAGGCCATTATCTTATCGGTGCTG  
GACATAACAGTGAAATTAACCCATGACTCAGAATGAGCAAAGGGAAGTTATTGATAAATTC  
CGAGGTGGAAATGTAAATTTACTTATTGCTACTACTGTAGCTGAGGAAGGCCTAGACATCA  
AAGAGTGTAACATCGTTATTCGCTATGGCCTCGTCACCAATGAAATTGCTATGGTGCAGGC  
TCGCGGTGAGCTCGAGCTGATGAGAGCACCTATGCACTTGTGGCTTCGAGTGGCTCAGG  
AGCTGTTGAACGTGAAGATGTTAATATTTTCCGTGAAAAAATGATGTATAAGGCCATTGAGC  
ATGTCCAGAAGATGCCACGGGAAGAGTATTTAAATAAGATTCAAAATTTCCAGTTGCAAAGT  
ATAGTGGAAAAAATGAAGGCCAAAGAGAGATCAGCGCAAGACATACAAGAAAAACCCCTT  
CACTAGTAACATTCCTATGCAAAAATTGCCACAAGCTGATATGTTCTGGAGAAGACATACAA  
GTTATTGAAAACATGCATCATGTTAGTGTGAAAAAAGATTTCCAAAGTCTTTACCATACAAG  
AGAAAATAAGACCCTGCAAGATAAGCATGTTGATTACCAGACAAATGGGGAAATTATATGTA  
AAGACTGCGGACAAGCTTGGGGAAATATGATGGTTACCCGAGGTCTTGACCTGCCTTGTCT  
AAAGATTAGAAATTTTGTGGTTGTGTTTGAAGACAAGAAAAACAACAAAGCAAATTTTTAAGA  
AATGGGGAGAACTGCCTGTTAGGTTCCCTAGTTTTGATTATGCAGCTCATTGGCCTTCAAG  
TGATGAAGATTAA

>gallus\_gallus-mda5

ATGTCGGAGGAGTGCCGAGACGAGCGCTTCCTCTACATGATCTCCTGCTTCAGGCCGCGG  
CTGAAGCGCTGCATCCGGGTGCAGCCGGTGCTGGACTGGCTGCCCTCGCTGAGCGCAGA  
GGAGAAGGACAAGGTGCGGGCGGCCGCGCTGCAGCGCGGCGAGGTGGAGGGGGCCGA  
GGAGCTGCTATGCGCCGTGGAACGTGGCCGCCGCGACCCCGGATGGTTCACTGAATTCC  
TGCTGGCGCTGAAGAAAGGCGGCTGTGACCTGGCCGCTTGCTACGTGAACCCAGCCAG  
TTGCCCTCGCCTCAGGAGGAGGACGACCACGATCTCTGTGTGCACTTGGTGCAGCTGCTG  
CACGGCACGCTGGTGGATAACATGCAGACCAGACAGGTGGCCGAGAAGTGTCTGGAGCT  
GGGCATCTTCCAGGAGGAGGACCTGGTTGGGATTGAGACTGTTATTGAGAGTCGTGGGAA  
CAGAGACGGTGCAAGGGAGCTGTTGAGCAGAATAGTGCAGAAGAAGGACTGGTTCTCTCA  
GTTTTTGGTTGCTCTGCGAGAAACCCAACATGAAAGCCTTGCAAGTGAAGTGGAAAT  
ACAGGAGGAACAGAGGATAAAGACTATGAGTTGAAGAACAACACAGGCAAAAAACAGAA  
GCTGCAAGCCAACCAAGTATATGTAACGGAGGATTTGAAACAGCAAGAAAATTTGGATGACA  
GTTTTGTCAGAGAGAGCAGTGTATTGGAAACATCTGTTGGAAAGAACTCTGTAATTCAGAA  
TCAGTTGCTGTAGGAGATGCAAGTGTGAGTAACCTGAACGAAAACCTGGGACAGAGCAGC  
ACGACCAGTGATTCAGGTGAAGATGAAGCAGAGGGCAGAGCTTCACCTGAGCCAGATCTC  
ACCCTGAGAGATTACCAGATGGAAGTTGCAAAACCAGCACTGAATGGGGAGAATATTATAA  
TATGTCTCCCTACAGGCAGTGGCAAACCAAGAGTGGCTGTTTACATTACCAAAGATCACTT  
GGATAAGAAGAGAAAAGCATCAGAGCAAGGAAAAGTTATAGTACTTGTTAATAAGGTACCG  
TTAGTGGAAACAGCATTTACGAAAGGAGTTTAAATCCATTCTGAAACACTGGTATCAAGTTAT  
TGGCTTAAGTGGTGATTCTGAGCTGAAAATCTCGTTTCCTGAAGTTGTCAAAAGATATGATG

TCATCATCTGTACAGCACAGATCCTGGAGAATTCCTGCTAAATGCAACTGAAGAAGATGA  
AAGTGTCCGCTTGTGAGATTTTTCTACTCATCATTATTGATGAGTGCCATCACACTCAAAAGG  
AAGGTGTTTACAACAATATCATGCGACGTTACTTAAAAGAAAAGATCAAGAACAGAAAGCAG  
GCAAAAGAGAACAAACCTTTGATTCCACAGCCGCAGATTCTGGGACTTACAGCCTCACCTG  
GAGTTGGAGGTGCAAGATCCAACCTCAAAAGCTGAAGAACATATTCTGAAAATCTGTGCCAA  
TCTTGATGCATGCAGAATCATGACTGTAAAGAGCATGCATCCCAACTGAAGAATCAGGTG  
AAGGAACCATTTAAGAAGACTGTGATTGCAGATGACAAAAGAAGGGATCCATTTAGAGAAA  
GAATTATTGAGATCATGCAAGATATTCAAAAATATTGCCAGCTCTATCCAAAATCTGAGTTT  
GGATCTCAGCCATATGAACAGTGGGTGATTAGGGAAGAGAGAAGAGCTGCAAAAGAAGAA  
AAACGCAAGGAACGTGTCTGTGCAGAACACTTGAAGAAATATAATGATGCTCTGCAAATTA  
ATGATACCATTCGAATGGTTGATGCATACAATCACCTAAATAACTTTTATAAGGAGCTAAAA  
AGGAGGAAGACAGCGGAGAGTGATGATGATGAAGAACCATTAGTATCAAAACAGGATGAA  
ACAGATGAATTTTTAATGCGTTTATTTTCATGCAAAAAAGAAACAACCTGAAAGAGTTGGCTAG  
AAAACCAGAATATGACAATGAGAAGCTAATGAAGCTCCGGAATACTTTAATGGAAGAGTTC  
ACAAAGACTGAAGAACCTAGAGGGATTATTTTCACGAAGACTCGACAAAGTGCCTTAGCTT  
TATACCACTGGATTATGGATAATCCAAAATTTGAAGAAGTGGGAATCAAAGCTCATTTTCTT  
ATTGGTGCTGGACACAATAGTGAACTAAACCTATGACTCAGAATGAGCAAAGGGAAGTCA  
TTGATAAATTCGAGGTGGAAGTATAAATTTACTTATTGCTACTACTGTAGCTGAGGAAGGC  
CTAGACATCAAAGAGTGTAACATTGTTATTCGCTATGGTCTGGTCACCAATGAAATTGCTAT  
GGTGCAGGCCCGGGGTCGAGCTCGAGCTGATGAGAGCACTTATGCACTTGTGGCTTCAAG  
TGGCTCAGGAGCTGTTGAACGTGAAGATGTAAATATTTTCCGTGAAAATATGATGTATAAGG  
CCATTCGACGTGTCCAAGAGATGCCGCCAGAAGAGTATTTAAATAAGATTCAGGACTTCCA  
GTTGCAAAGCATAGTGGA AAAACAAATGAAGGCAAAGAGAGATCAGCGTAAGACATATAAG  
AAAAACCCTTCACTAATAACATTCTGTGCAAGAATTGCCACAAGTTGATATGTTCTGGAGA  
AGATATACAAGTTATTGAAAATATGCATCATGTGAGTGTGAAAAAAGATTTCCAACATCTTTA  
CCATAAAAGAGAAAAACAGGACATTGCAAGACAAGCATGCTGATTACCAGACAAACGTGGAA  
ATTATATGTAAAGATTGTGGACAAGTTTGGGGAAATATGATGGTTTATCGAGGTCTTGACCT  
GCCTTGTCTAAAGATTAGAAATTTTGTGGTTGCTTTTGAAGACAAGAAAAACAAGGAAA  
TTTTCAAGAAATGGGGAGAACTGCCCATCATATTTCTGATTTTGATTATGCATCTCATTGT  
CCTTCAAGTGATGAAGATTAA

>geothlypis\_trichas-md5

ATGGCAGAGGGCACCCGGGACGAGCGGTTCTCTACATGATCTCCTGCTTCAGGCCGCG  
GCTGAAGCAGTACATCCAGGTGCAGCCCGTGCTGGACCGGCTGCCCTCGCTGAGCGCGG  
AGGACCGGGACAGGGTGCCTGCGGCCGCCCTGCAGCGGGGCGCGGCGGGCGCGCCG  
AGGAGCTGCTGCGGGCCGTGGAGCGGGGGCCCCGCGGCTGCGGCTGGATCCGCGAGTT  
CCTGCAGGCGCTGGAGCACGGCGGCTGCAGCCTGGCCGCCTGCTACGCCAACCCAGC  
CTCAGCCAGCTGCCCTCGCCGGCAGAGGAGGCCGAGCATGACCTCTGCGTGCACCTGGT  
GCAGCTGCTGCACGGCACGCTGGTGGACAGGATGCGCGCCGAGCAGGTGGCCGAGAAG  
TGCCTGCAGATGGGAATCTTCCAGGACGAGGACGTGGATCGGATCCAGACTGTTACTGAC  
AATCGTGGGAACAGAGATGGTGCAAGGGAGCTACTGAGCAGAATAGTCCAGAAGAAAGAC  
TGGTTCTCTTCTTTTTTATTGCTCTCCGTGAAACCCAAACATGAAGACCTTGCAGATGATTT  
AAGTGGAATACAGCAGAGAATAAACAAGTGGGATGGAGCAGACTACGAATGAAGAAAC  
AGAAGTTACAAGCCAACCAGGATACGTCATAGAGGAGAATTTGAAACAGGAAGAAAATGTG  
AATGATAGTTTCAGCAGTGAGAACAGTCTGTTGGAACATCCATAGAAAAGAATTCTGTGAT



GGCAGACTCAGATGTCTCCATAGGAGATGGAAGTGTCAGTAACTTGAATGGAAACCTGGAA  
CAGAGCTGCACAACCAGTGATTGAGATGAAGTTGAGAGGAGAGCCTCACCTGAGCCAGAT  
CTGACCCTGAGAGATTACCAGATGGAAGTTGCAAAGCCAGCATTGAATGGGGAGAATATTA  
TCATATGTCTCCCTACAGGCAGTGGTAAAACCAGAGTGGCTGTTTACATTACCAAAGATCA  
CTTGGATAAGAAGAAAAGAGCATCAGAGCCTGGAAAAGTCATAGTACTTGTTAATAAGGTT  
CCATTGGTAGAGCAGCATTTAAAAAGAGAGTTTAGTCCATTCTGAAGCGCTGGTATCAGG  
TTATTGGTTTAAGTGGTGATTCTCAGCTGAAAATCTCATTTCTGAAGTTGTCAGAAGAAAT  
GATGTCATCATCAGTACAGCACAGATCCTTGAGAATTCAGTGTAAATGGGTCCAAGGAAG  
ATGAAGAAAGTGTCACCTTATCAGATTTTTCCCTCATCATCATCGATGAGTGTATCATACT  
CAAAAGGAAGGTGTCTACAATAACATAATGCGACGTTACTTAAAAGAAAAGATGAAGAACA  
GGAAGCTGGCAAAAGAAAACAAACCACTGATCCCACAGCCTCAGATTCTGGGACTTACAG  
CCTCACCTGGTGTAGGAGGTGCAACATCCTACTCAAAGCTGAAGAGCATATTCTGAAAAT  
CTGTGCCAATCTTGATGCATGTAGAATTATGACTGTTGAAGAGCATGCCTCCCAGCTAAAG  
AATCAGGTGAAGGAACCGTCTAAGAAGACTGTGATTGCAGATGACAAAAAAGGGATCCAT  
TTAAAGAGAGAATCACTGAGATCATGACAGAAATACAGAACTATTGCCAGCTGCATCCAAA  
GTCTGAGTTTGGAAGTACAGACATATGAACAGTGGGTGATCAGAGAAGAGAGAAGAGCTGC  
GAAAGAAGAAAAACGCAGGGAACGTGTCTGTGCAGAGCACTTGAAGAAATACAATGATGCT  
CTCCAGATAAATGACACCATCCGAATGGTGGATGCCTACAATCACCTAAATAACTTTTATAA  
AGAGGAGAAAAGTAAGAAGACAGTAAGGAGTGATGATGATGATGATGATGAACCAGC  
AGTATCAAAACAGGATGAAACAGATGAATTTCTAATAGGTTTATTTTCATGAAAAAAGAAAC  
AGCTGAAAGAGTTGACTAGAAAGCCAGAAATGAAAATGAGAAGCTAACGAAGTTGAGAAA  
TACTTTAATGGAGGAGTTCACAAAGATTGAAGAACCTCGAGGAATCATTTTCACAAAGACTC  
GTCTAAGTGCCCTTTGCTCTTTTCCAGTGGATTAAGGACAACCCAAAATTTGAAGAAGTGGG  
AATTAAGGCCCATTTATCTTATCGGCTCTGGACATAAGAGTGAAATGAAGCCCATGACTCAG  
AATGAGCAAAGGGGAAATTATTGATAAATTTGATGTGGAAATGTAAATTTACTAATTGCTACT  
ACTGTAGCTGAGGAAGGCCTGGACATCAAAGAGTGTAACATCGTTATTCGCTATGGCCTCG  
TCACCAATGAAATTGCTATGGTGCAGGCTCGTGGTAGAGCTCGAGCTGATGAAAGCACCTA  
TGCTCTTGTGGCTTCAAGTGGTTCAGGGGCTGTTGAACGTGAAAATGTTAATATTTTTCGTG  
AGAAAATGATGTATAAGGCCATTGAGCGTGTCCAGAAGATGCCACAGGAAGAGTATTTAAA  
TAAGATTCAGAGTTTCCAGTTGCAAAGTATAGTGGA AAAACAAATGAAGGTGGTGAGAGAT  
CAGCGCAAGACATACAAGAAAAATCCTTCACTAATAAAATTTCTTATGCAAAAATTGCTCCAA  
GCCGATATGTTCTGGAGAAGACATACAAGTTATTGAAGACATGCATCATGTGAGTGTGAAA  
AAAGATTTTCAAAGTCTTTATCATACAAGAGAAAATAAAACACTGCAAGATAAGCATGCTGA  
TTACCAGACAAATGGGGAAATTATATGCAAAGACTGTGGACAAGCTTGGGGAAATATGATG  
GTTACCCGAGGTCTTGACCTGCCTTGCTAAAGATCAGAAATTTTGTTGGTTGTGTTTGCAGA  
CAAGAAAACAACAACAATATTTTTAAGAAATGGGGAGACCTGCCCATCAGGTTTCCTAGTT  
TTGATTATGCAGCTCATTTTCCTTCAAGTGATGAAGATTAA

>guaruba\_guarouba-mda5

ATGGCAGAGGAGTTGCGAGACGAGCGGTTCTCTACATGATCTCGTGCTTCAGGCCGCGG  
CTGAAGCAGTTCATCCGAGTGACAGCCGGTGCTGGACCGGCTCCCTTCGCTCAGCGCGGA  
CGACAGGGAGAAGGTGCGGGCGGCCGCGCTGCAGCGGGGCGAGGTGGAAGGGGCGGA  
GGAGCTGCTGCGGGCCGTGGAGCGGGGGCCCCGCGGGTGTGGCTGGTTCCACGAGTTC  
TTGCAGGCGCTGGAGCACGGCGGCTGTGGCATGGCCGCTTGCTACGTGAACCCACCCCT  
CAGCCAGCTGCCCTCGCCAGCTGAGGAGGCCGACCACGACCTCTGCGTGCAATTTGGTGC

AGCTGCTCCATAGCACGCTCGTGGATAGTATGCGGACCGTGCAGGTGGCCGAGAAGTGC  
CTGCAGATGGGCATCTTCCAGGATGAGGACCTGGATGGGATCCATACTGTTACTGACAATC  
GTGGGAACAGAGAAGGTGCAAGGGAGCTATTGAGCAGATTAGTGCAGAAGAAAGATTGGT  
TCTCTCGGTTTTTTGATTGCTTTGCGTGAAACCCAACATGGAGGCCTTGCAGATGATTTAAGT  
GGAAATACAGGAGGAACAAAGGATAAACAAAATGGGATGAAGAACAGTACAAACAAAGAAA  
TAGAAGTTACAAGCCAACCAGGTTATGCCATACTGGAGGATTTGAAGCAGCAGGAAAATAT  
GAATTATAGTTTTCAGCAGTGAGAACAATTTATTGGAAACATCTATTGGAAAGAATTCTTTAGT  
TTCAGAGTCAGATGTCTCTATAGGATTTGGAAGTGTCAGTAACTTGAATGAAAACCTGGGA  
CAGAGCTGCACAAGCAGTGATTCAGATGAAGAGGAGAGCAGAGCTTCACCTGAGCCAGAT  
CTGGTCCTGAGAGATTACCAGATGGAAGTTGCAAAGCCAGCACTGAATGGGGAGAATATTA  
TAATATGTCTCCCTACAGGCAGTGGTAAAACCAAGAGTGGCTGTTTACATTACCAAAGATCAT  
TTGGATAAAAAGAAAAGAGCATCAGAGCCTGGAAAAGTTATAGTCCTTGTTAATAAGGTACC  
ATTGGTAGAACAGCATTTACGAAAGGAGTTTAGTCCATTCTGAAGCGCTGGTATCACATTA  
TTGGTTTAAAGTGGTGATTCTCAGCTGAAAATATCATTTCCTGAAGTTGTCAGAAGAAATGAT  
GTCATCATCTGTACAGCACAGATCCTTGAGAATTCAGTGCTAAATGCAGACAAAGAAGATG  
AAGAAGGTGTCCACTTATCAGATTTTTCTACTCATCATTATTGATGAGTGTATCACACTCAA  
AAGGAAGGTGTCTACAACAACATAATGCGACGTTACTTAAAAGAAAAGAAGAAGAACAGGA  
AGCTGGCAAAAAGAAAACAAACCACTGATCCCGCAGCCTCAGATTTTGGGACTTACAGCCTC  
ACCCGGTGTAGGAGGTGCAACATCCTATTCCAAAGCTGAAGAACATATTCTGAAAATCTGT  
GCTAATCTTGATGCATGTAGAATCATGACTGTTGAGGAGCATGCCTCCCAGCTGAAGAATC  
AGGTGAAGGAACCTTTTAAGAAGACTGTGATAGCAGATGACAAAAAAAAGGATCCATTTAG  
AGAGAGAGTAACTGAGATCATGACAGAGATTCAAACTATTGCCAGCTTCATCCAAAATCT  
GAGTTTGGAACCTCAGCCATATGAGCAGTGGGTGATTAGAGAAGAGAAAAAAGCTGCAAAA  
GAAGAAAAACGCAAGGAACGTGTCTGTGCAGAACACCTGAAGAAATACAATGATGCTCTCC  
AGATAAATGATACCATCCGAATGGTAGATGCGTACAATCACCTGAATAACTTTTATAAGGAT  
GAGAAAAAGTAAGAAGACAGAAAGGAGTGATGATGATGACGATGCACCAGCAGTATCAAAA  
CAGGATGAAACAGATTTATTTCTAATAGGTTTATTTTCATGCAAAAAAGAACAGCTGAAAGA  
GTTGGCTAGAATGCCAGAATATGAAAATGAAAAGCTAACACAGTTGCGAAACACTTTAATG  
GAGGAGTTCACGAAGACTGAGGCACCTAGAGGAATTATTTTACAAAGACCCGGCTAAGT  
GCTTTTGCTCTATTCCAGTGGATTAAGGATAACCCAAAATTTGAAGAAGTGGGAATTAAGGC  
CCATTATCTTATTGGTTCTGGACATAACAGTGAAATGAAACCCATGACGCAGAATGAGCAG  
CGGGAAGTTATTGATAAATTCCGAGGTGGAAATTTGAATTTACTTATTGCTACTACTGTAGC  
TGAGGAAGGCCTAGACATCAAAGAGTGTAACATTGTTATTGCTATGGCCTCGTCACCAAT  
GAAATTGCTATGGTGCAGGCTCGTGGTCGAGCTCGAGCTGATGATAGCACCTATGCACTT  
GTGGCTTCGAGTGGCTCAGGAGCTGTTGAACGTGAAGATGTTAATATTTTCCGTGAGAAAA  
TGATGTATAAAGCCATTCAGCATGTCCAGAAGATGCCACAGGAGGAGTATTTAAAGAAGAT  
TCAGAATTACCAGTGTCAAAGTATAGTAGAAAAAGAAATGAAGGCAAAGAGACATCAGCAC  
AAGACATACAAGAAAAATCCTTCACTAATATCATTCCCTATGCAAAAATTGCCACAAGCTGGT  
ATGTTCTGGGGAAGACATACGAGTTATTGAAAACATGCATCATGTCAGTGTGAAAAGAGAT  
TTCCAAAGTCTTTACCATACAAGAGAAAATAAGACGCTGCAAGATAAGAATGCTGATTACCC  
GACAAATGGAGAAGTTATATGTAAAGATTGTGGACAAGCTTGGGGAAATATGATGGTTCAC  
CGAGGTCTTGATCTGCCTTGTCTAAAGATTATAAATTTTGTGATTGTGTTTGAAGACAAGAA  
AACAAGAAAAGAAATTTTTAAGAAATGGAGAGAGCTGCCCATCAAGTTCCTGGTTTTGATT  
ATGCAGCTCATTGTCCTTCAAGTGATGAAGATTAA

>haliaeetus\_leucocephalus-mda5

ATGGCAGCGGAGACCCGAGACGAGCGCTTCCTCTACATGATCTCCTGCTTCAGGCCGCGG  
CTGAAGCAGGTCATCCGCGTGCAGCCGGTGCTGGACCGGCTTCCCTCGCTGAGCGCGGA  
GGAGAGGGAGAAGGTGCGGGCGGCCGCCCTGCAGCGGGGCGAGGTGGAGGGGGCGGA  
GGAGCTGCTGCGGGCCGTGGAGCGGGGGCCCCGCGGGTGCGGCTGGTTCCACGAGTTC  
CTGCAGGCGCTGGAGCACGGCGGCTGCAGCCTGGCCGCCTGCTACGTGAACCCAGCCT  
CAGCCAGCTGCCCTCGCCGGCCGAGGAGGCCGACCACGACCTCTGCGTGCACTTGGTG  
AGCTGCTCCACAGCACGCTGGTGGATAAAATGCAGACCATGCAGGTGGCCGAGAAGTGCT  
TGCAGATGGGCATCTTCCAGGACGAGGACCTGGATCGGATCCACACTGTTACTGACAATC  
GTGGGAACAGAGATGGTGCAAGGGAGCTACTGAGCAGAATAGTGCATAAGAAAGATTGGT  
TCTCTCCTTTTTGATTGCTCTGCGTGAAACCCAGCATGGAGGCCTTGAGATGATTTAAG  
CGGAAATACAGGAGGAACAGAGAATAGACAAGATGGGATGAAGAACAGTACAAATGAAGA  
AACAGAAGTTATAAGCCAACCAGGATATGCCGTAGTAGAGGATTTGAAACAGCAAGAAAAC  
GTGAATGAAAGTTTCAGCAGTGAGAACAGTGTATTGGAAGCATGTATTGGAACGAATTCTG  
TAGTTTCAGAGTCAGATGTCTCCATAGGAGATAGAAGTGTCAGTAACATGAATGAAAACCTA  
GGACAGAGCTGCACAACCAGTGATTGAGATGAAGATGAAATGGAGAGCAGAGCTTCACCT  
GAGCCAGATCTGATCCTGAGAGATTACCAGATGGAAGTTGCAAAGCCAGCACTGGATGGG  
GAGAATATTATAATATGTCTCCCTACAGGCAGTGGTAAAACCAGAGTGGCTGTTTACATTAC  
CAAAGATCATTGAGATAAGAAGAAAAGAGCATCAGAGCCCGGAAAAGTTATAGTACTTGT  
AATAAGGTACCATTGGTAGAGCAGCATTTACGAAAGGAGTTTAATCCATTCTGAAGCGTT  
GGTATCAGGTTATTGGTTTAAGTGGCGATTCTCAGCTGAAAATCTCATTTCTGAAGTTGTC  
AGAAGAAATGATGTCATCATCAGTACAGCGCAGATCCTTGAGAATTCATTGTTAAATGCAGC  
CAAAGAAGATGAAGAAGGTGTCCAGTTATCAGATTTTCACTCATCATTATCGATGAGTGTC  
ATCACACTCAAAGGAAGGTGTCTACAACAATATAATGCGACGTTACTTAAAAGAAAAGATG  
AAGAACAGGAAGCTGGCAAAAGAAAACAAACCACTGATCCACAGCCTCAGATTCTGGGA  
CTTACAGCCTCACCTGGTGTAGGAGGTGCAACATCCTACTCAAAGCTGAAGAACATATTC  
TGAAAATCTGTGCCAATCTTGATGCATGTAGAATCATGACTGTTGAAGAGCATGCCTCCCA  
ATTGAAAAATCAGGTGAAGGAACCATATAAGAAGACTGTGATTGCAGATGACAAAAGAAGG  
GATCCATTTAGAGAGAGAATTACTGAGATCATGACAGACATTCAAACCTATTGCCAGCTCCA  
TCCAAAATCTGAGTTTGGAACCTAGCCATATGAACAGTGGGTGATTAGAGAAGAGAGAAGA  
GCTGCAAAAGAAGAAAAACGCAAGGAACGTGTGTGTGCAGAACACTTGAAGAAATACAATG  
ATGCTCTCCAGATAAATGACACCATCCGAATGGTGGATGCGTACAATCACCTAAATAACTTT  
TATAAGGAGGAGAAAAGTAAGAAGACAGTAAGGAGTGATGATGATGATGATGATGAAC  
CAGCAGTATCAAACAGGATGAAACAGATGAATTTCTAATAGCTTTATTTTCATGCAAAAAG  
AAACAGCTGAAAGAGTTGGCTAGAAAGCCAGAATATGAAAATGAGAAGCTAATACAGTTGC  
GAAACACTTTAATGGAGGAGTTCACGAAGACTGAAGAACCTAGAGGAATTATTTTCACAAA  
GACTCGGCTAAGTGCCCTTTGCTTTATTCCAGTGGATTAAGGATAACCCAAAATTTGAAGAAG  
TGGGAATTAAGGCCATTATCTTATCGGTGCTGGACATAACAGTGAAATTAACCCATGACT  
CAGAATGAGCAAAGGGAAGTTATTGATAAATCCGAAGTGGAATGTAAATTTACTTATTGC  
TACTACTGTAGCTGAGGAAGGCCTAGACATCAAAGAATGTAACATCGTTATTCGCTATGGC  
CTCGTCACCAATGAAATTGCTATGGTGCAGGCTCGTGGTTCGAGCTCGAGCTGATGAGAGC  
ACCTATGCACTTGTGGCTTCGAGTGGCTCAGGAGCTGTTGAACGCGAAGATGTTAATATTT  
TCCGTGAGAAAATGATGTATAAGGCCATTCAGCGTGTCCAAAAGATGCCACAGGAAGAGTA  
TTTAAATAAGATTCAGAATTTCCAGTTGCAAAGTATAGTGGA AAAACAAATGAAGGCAAAGA

GAGATCAGCGCAAGACATACAACAAAAATCCTTCACTAATAACATTCTTATGCAAAAATTGC  
CACAAGCTGGTATGTTCTGGAGAAGACATACAGGTTATTGAAAACATGCATCATGTCAGTG  
TGAAAAAAGATTTCCAAAGTCTTTACCATACAAGAGAAAAATAAGACACTGCAAGATAAGCGT  
GCCGATTACCAGATAAATGGGGAAATTATATGTAAAGATTGTGGACAAGCTTGGGGAAATA  
TGATGGTTCACCGAGGTCTTGACCTGCCTTGTCTAAAGATTAGAAATTTTGTGGTTGTGTTT  
GAAGACAAGAAAACAACAAAGCAAATGTTTAAGAAATGGGGAGAACTGCCTGTCAAGTTCC  
CTAATTTTGATTATGCAGCTCATTGTCCTTCAAGTGATGAAGATTAA

>hemignathus\_wilsoni-mda5

ATGGCAGAGGGCACCCGGGACGAGCTGTTCTCTACATGATCTCCTGCTTCAGGCCGCGG  
CTGAAGCAGTTCATCCAGGTGCAGCCCGTGTTGGACCGGCTCCCCTCGCTGAGCGCGGA  
GGACAAGGACAGGGTGCGTGCGGCCGCCCTGCAGAGGGGCGCGGCTGCGGGCGCGGA  
GGAGCTGCTGCTGGCCGTGGAGCGGGGGCCCCGCGGCTGCGGCCCCGATCCGCGAGTTC  
CTGCAGGCGCTGGAGCACGGCGGCTGCAGCCTGGCCGCCTGCTACGCCAACCCCAGCCT  
GAGCCAGCTGCCCTCGCCAGAAGAGGAGGCCGAGCACGACCTCTGCGTGCACCTGGTGC  
AGCTGCTGCACGGCACGCTGGTGGACAGGATGCGCACCGTGCAGGTGGCCGACAAGTGC  
CTGCAGATGGGAATCTTCCAGGACGAGGACGTGGATCGGATCCAGACTGTTACTGACAAT  
CGTGGGAACAGAGATGGTGCAAGGGAGCTACTGAGCAGAATAGTCCAGAAGAAATACTGG  
TTCTCTTCTTTTTTGGTTGCTCTCCGTGAAACGCAACATGAAGACCTTGCGATGATTAAAG  
TGGAATAACAGGAGAGAATAAAGAAAATGGGATGGAGCAGACTACGAACGAAGAAACAGA  
AGTTACAAGCCAACCAGGATACATCATAGAGGAGAATTTGAAACAGGAAGAAAATGTGGAG  
GATAGTTTCAGCAGTGAGAGCAGTCTGTTGGAAACATCCATAGAAAAGAATTCTGTGATGT  
CAGAGTCAGATGTCTCCACAGGAGAGGGAAGTGTGAGTAACTTGAACGGAAACCTGGAGG  
AGAGCTGCACAACCAGTGATTCAGATGAAGTTGAGAGGAGAGCCTCACCTGAACCAGATC  
TGACTCTGAGAGATTACCAGATGGAAGTTGCAAAGCCAGCCTTGAATGGGGAGAATATTAT  
CATATGTCTTCTACAGGCAGTGGTAAAACCAGAGTGGCTGTTTACATTACCAAAGATCACT  
TGGATAAGAAAAAAGAGCATCAGAGCCTGGAAAAGTCATAGTACTTGTTAAACAAGGTTCC  
ATTGGTAGAACAGCATTTAAAAAGAGAGTTTAGTCCATTCCTGAAGCATTGGTATCAGGTTA  
TTGGTTTAAAGTGGTGATTCTCAGCTGAAAATCTCATTTCCTGAAGTTGTCAGAAGAAATGAT  
GTCATCATAAGTACAGCACAGATCCTTGAGAATTCAGTGTAAATGCATCCAAAGAAGATGA  
AGAAAGTGTCTACTTATCAGATTTTTCCCTCATCATCATCGATGAGTGCCATCACACTCAA  
AGGAAGGTGTCTACAATAATATAATGAGACGTTACTTAAAAGAAAAGATGAAGAACAGGAA  
GCTGGCAAAAGAAAACAACCACTGATCCCACAGCCTCAGATTCTGGGACTTACAGCCTCA  
CCTGGTGTAGGAGGTGCAACATCCTACTCAAAGCTGAAGAGCATATTCTGAAAATCTGTG  
CCAATCTTGATGCATGTAGAATTATGACTGTTGAAGAGCATGCCTCCCAGCTAACGAATCA  
GGTGAAGGAACCGTCTAAGAAAACCTGTGATTGCAGATGATAAAAAAAGGGATCCATTTAA  
GAAAAAATTACTGAGATCATGACAGAAATACAAAACCTATTGCCAGCTGCATCCGAAGTCTGA  
GTTTGGAACCTCAGACATATGAACAGTGGGTGATCAGAGAAGAGAGAAGAGCTGCGAAAGA  
AGAAAAACGCAGGGAACGTGTCTGTGCAGAGCACTTGAAGAAATACAATGATGCTCTCCAG  
ATAAATGACACCATCCGAATGGTGGATGCCTACAATCACCTAAATAACTTCTATAAAGAGGA  
GAAAAGTAAGAAGACAGTAAGGAGTGATGATGATGATGATGATGAACCAGCAGTATCAAAA  
CAGGATGAAACAGATGAATTTCTAATAGGTTTATTTACGCAAAAAATAAACAGCTGAAAGA  
GTTGACTACAAAGCCAGAAAATGAAAATGAGAAGCTAACGAAGTTGAGAAATACTTTAATG  
GAGGAGTTCACGAAGACTGAAGAACCTCGAGGAATCATTTTCACAAAGACTCGTCTAAGTG  
CCTTTGCTCTATTCCAGTGGATTAAGGACAACCCAAAATTTGAAGAAGTGGGAATTAAGGC

CCATTATCTTATCGGCTCTGGACACAAGAGTGAAATGAAGCCCATGACTCAGAATGAGCAA  
AGGGAAGTTATTGATAAATTTTCGATGTGGAAATGTAAATTTACTAATTGCTACTACTGTAGCT  
GAGGAAGGCCTGGACATCAAAGAGTGTAACATCGTTATTCGCTATGGCCTCGTCACCAATG  
AAATTGCTATGGTGCAGGCTCGTGGTAGAGCTCGAGCTGATGAAAGCACCTATGCTCTTGT  
GGTTTCAAGTGGCTCAGGGGCTGTTGAACGTGAAAATGTTAATATTTTTTCGTGAGAAAATG  
ATGTATAAGGCCATTCAGCGTGTCCAGAAGATGCCACAGGAAGAGTATTTAAAGAAGATTC  
AGAGTTTTCCAGTTGCAAAGTATAGTGGAAAAACAAATGAAGGTGGTGAGACATCAGCGCAA  
GACATACAAGAAAAATCCTTCACTAATAAAATTCTTATGCAAAAATTGCTCCAAGCCGATAT  
GTTCTGGAGAAGACATACAAGTTATTGAAGGCATGCATCATGTCAGTGTGAAAAAAGATTTTC  
CAAAGTCTTTATCATACAAGAGAAAAATAAAACGCTGCAAGATAAGCATGCTGATTACCAGAC  
AAATTGGGAAATTATATGCAAAGACTGTGGACAAGCTTGGGGAAATATGATGGTTCACCGA  
GGTCTTGACCTGCCTTGTCTAAAGATCAGAAATTTTGTGGTTGTGTTTGCAGACAAGAAAAAC  
GACAAACAATATTTTTTAAGAAATGGGGAGACCTGCCCATCAGGTTTCCTAGTTTTGATTATG  
CAGCTCATTGTCCTTCAAGTGATGAAGATTAG

>herpetotheres\_cachinnans-mda5

ATGGCCGCGGAGTCCCGAGACGAGCGCTTCCTCTACCTGATCTCCTGCTTCAGGCCGCG  
GCTGAAGCAGTTCATTCGGGTGCAGCCGGTGTGGACCAGCTTCCCTCGCTGGGCGCGG  
AGGAGCGGGAGAAGGTGCGGGCGGCCGCCCTGCAGCGGGGCGAGGTGGAGGGGGCAG  
AGGAGCTGCTGCGGGCCGTGGAGCGGGGGCCCCGCGGCTGCGGCTGGTTTCACGAGTT  
CCTGCAGGCGCTGGAGCACGGCGGCTGCAGCCTGGCCGCTGCTACGTGAACCCAGCC  
TCAGCCAGCTGCCGTGCGCGGCCGAGGAGGCCGACCACGACCTCTGCGTGCACTTGGTG  
CAGCTGCTCCACGGCACGCTGGTGGATAGAATGCAGACCATGCAGGTGGCCGAGAAGTG  
CCTGCAGAAGGGCATCTTCCAGGACGAGGACCTGGATCGGATCCAGACTGTTACAGACAA  
TCGTGGGAACAGAGATGGTGCAAGGGAGCTACTGAGCAGAATAGTGCAGAAGAAAGATTG  
GTTCTCACCTTTTTTGGTTGCTCTGCGTGAAACCCAACATGGAGACCTTGCAGATGATTTAA  
GTGGAATACAGGAGGAAGAGAGAATAGACAACATGGGATGAAGAACAGTACAAATGAAG  
AAACAGAAATTACAAGCCAAGCAGGATATGCTGTAGTGGAGAATTTGAAACAGCAAGAAAA  
TATGAGTGATAGTTTCAGCAGTGAGAACAGTGTATTGGAGACACCTATTGGAAAGGATTCT  
GTAGTTTCAGAGTCCGGTGTCTCCATAGGAGATGGACGTGTCAGTAACCTTGAATGAAAACC  
TGGGACAGAGCTGCACAACCAAGTATTGATGAAGATGAAGTGGAGAGCAGAGCTTCAC  
CTGAGCCAGAACTGATCCTGAGAGATTACCAGATGGAAGTTGCAAAGCCAGCACTGAATG  
GGGAGAATATTATAATATGTCTCCCTACAGGCAGTGGTAAAACCAGAGTGGCTGTTTACAT  
TACCAAAGATCACTTGGATAAGAAGAAAAGAGCATCAGAGCTTGGAAAAGTTATAGTACTT  
GTTAATAAGGTACCGTTGGTAGAACAGCATTTACGAAAGGAGTTTAACCCATTTCCTGAAGC  
GTTGGTATCAGGTTATTGGTTTAAGTGGTGATTCTCAGCTGAAAATCTCATTTCTGAAGTT  
GTCAGAAGAAATGATGTCATCATCAGTACAGCACAGATCCTTGAGAATTCAGTGTAAATGC  
AGCTGAAGAAGATGAAGAAGGTGTCCACTTATCAGATTTTTCACTCATCATTATTGATGAGT  
GTCATCATACTCAAAGGAGGGTGTCTACAACAATATAATGCGACGTTACTTAAAAGAAAAG  
ATGAAGAACAGGAAACTGGCAAAAGAAAACAAACCACTGATTCCACAGCCTCAGATTCTGG  
GACTTACAGCCTCACCTGGTGTAGGAGGTGCAACATCCTACTCAAAGCTGAAGAACATAT  
TCTGAAAATCTGTGCCAACCTTGACGCATACAGAATCATGACTGTTGAAGAGCATGTCTCC  
CAGTTGAAGAATCAGGTGAAGGAACCGTATAAGAAGACTGTGATTGCAGATGACAAAAGAA  
GGGATCCATTTAGAGAGAGAATTACTGAGATCATGACAGACATTCAAACCTATTGCCAGCT  
CCATCCAAAATCTGAGTTTGGAACTCAGCCATATGAACAGTGGGTGATTAGAGAAGAGAAA

AAAGCTGCAAAAAGAAGAAAAACGCAAGGAACGTGTCTGTGCAGAGCACTTGAAGAAATACA  
ATGATGCTCTCCAGATAAATGACACCATCCGAATGGTAGATGCGTACAATCATCTAAATAAC  
TTTTATAAGGAGGAGAAAAAGTAAGAAGACAGTAAGGAGTGATGATGATGATGATGATGATG  
ATGAACCAGCAGTATCAAAACAGGATGAAACAGATGAATTTTTAATAGGTTTATTTTCATGCA  
AAAAAGAAACAGCTGAAAGAGTTGGCTAGAAAGCCAGAATATGAAAATGAGAAGCTAATAC  
AGTTGCGAAACACTTTAATGGAGGAGTTCACGAAGACTGAGGAACCTAGAGGAATTATTTT  
CACAAAGACTCGGCTAAGTGCCTTTGCTCTATTCCAGTGGATTAAGGATAACCCGAAATTT  
GAAGAAGTGGGAATTAAGCCCCATTATCTTATTGGTGCTGGACATAACAGTGAAATTAAACC  
CATGACTCAGAATGAGCAAAGGGAAGTTATTGATAAATTCCGAGGTGGAAATGTAAATTTAC  
TTATTGCTACTACTGTAGCTGAGGAAGGCCTAGACATCAAAGAGTGTAACATTGTTATTCGC  
TATGGCCTCGTCACCAATGAAATTGCTATGGTGCAAGGCTCGTGGTCGAGCTCGAGCTGAT  
GAGAGCACCTATGCACTTGTGGCTTCCAGTGGTTCAGGAGCTGTTGAACGTGAAGATGTTA  
ATATTTTCCGTGAGAAAATGATGTATAAGGCCATTGAGCGTGTCCAGAAGATGCCGCAGGA  
AGAGTATTTGAATAAGATTCAGAATTTCCAGTTGCAAAGTATAGTGGAACAAATGAAGG  
CAAAGAGAGATCAGCGCAAGATATACAAGAAAAATCCTTCACTAATAACATTCCTATGCAAA  
AATTGCCACAAGCTGATATGTTCTGGAGAAGACATACAAGTAATTGAAAACATGCATCATGT  
CAGTGTGAAAAAAGATTTCCAAAGTCTTTACCATACAAGAGAAAAATAAGACACTGCAAGATA  
AGCATGCAGATTACCAGACAAATGGGGAAATTATATGTAAAGATTGTGGACAAGCTTGGGG  
AAATATGATGGTTCACCGAGGTCTTGACCTACCTTGTCTAAAGATTAGAAATTTTGTGGTTG  
TGTTTGAAGACAAGAAAAACAACAAAGAACATTTATAAGAAATGGGGAGAACTGCCTGTCAC  
ATTCCCTACTTTTGATTATGCAGCTCATTGTCCTTCAAGTGATGAAGATTAA

>himantopus\_himantopus-mda5

ATGGCAGTGGAGTCCCGAGACGAGCGCTTCCTCTACATGATCTCCTGCTTCAGGCCGAGG  
CTGAAGCAGGTCATACGGGTGCAGCCGGTGCTGGACCGGCTTCCCTCGCTGAGCGCGGA  
GGAGCGGGAGAGGGTGCGGGCGGCCGCCGTGCAGCGGGGCGAGGTGGAGGGGGCGGA  
GGAGCTGCTGCGGACCGTGAGCGGGGCCCCCGGGTGCGGCTGGTTCCACGAGTTC  
CTGCAGGCGCTGGAGCACGGCGGCTGCAGCCTGGCTGCTTGTATGTGGACCCCAACCT  
CAGCCAGCTGCCCTCGCCAGCCGAGGAGGCCGACCACGACCTCTGCGTGCACTTGGTG  
AGCTGCTCCACAGCACGCTGGTGGATAAAATGCAGACCATGCAGGTGGCTGAGAAGTGCC  
TGCAGATGGGCATCTTCCAGGACGATGACCTGGATCGGATCCCACTGTTACTGACAGAC  
ACGGGAACAGAGATGGTGCAAGGGAGCTATTGAGCAGAATAGTGAGAAGAAAGACTGGT  
TCTCTCCTTTTTTGTAGTGCTTTGCGTGAAACCCAGCATGGAGACCTTGCAGATGATTTAAGC  
GGAAATACAGGAGGAACAGAGAATAGACAAAATGGAATGAAGAACAGTACAAGTGAAGAAA  
CAGAAGTTACAAGCCAACCAGGATACGCTGTAGTGAAGGATTTGAAACAAGAAGAAAATGT  
GAATGATAGTTTTAGCAGTGAGAACAGTGTATTGAAACATCTATTGAAAGAATTCTGGA  
GTTTCAGAGTCAGATGTTTCCATAGGAGATGGAAGTGTTGGTAACTTGAATGAAAACCTGG  
GACAGAGCTGCACAACCAGTGATTCAGATGAAGATGAACTGGAGAGCAGAGCTTCACCTG  
AGCCAGATCTGATCCTGAGAGATTACCAGATGGAAGTTGCAAAGCCAGCACTGAATGGGG  
AGAATATCATAATATGTCTGCCTACAGGCAGTGGTAAAACCAGAGTGGCTGTTTACGTTAC  
CAAAGATCACTTGGATAAGAAGAAAAGAGCATCAGAGCTTGGAAAAGTTATAGTACTTGTTA  
ATAAGGTACCGCTGGTAGAACAGCATTTACGAAAGGAGTTTAATCCATTCCTGAAGCGTTG  
GTATCGGGTTATTGGTTTAAGTGGTGATTCTCGGCTGAAAATCTCATTTCTGAAGTTGTCA  
GAAGAAATGATGTCATCATCAGTACAGCACAGATCCTTGAGAATTCAGTTCAATGCAGC  
CGAAGAAGATGAAGAAGGTGTCCACTTATCAGATTTTTCACTCATCATTATTGATGAGTGTC

ATCACACTCAAAGGAAGGCGTCTACAACAATATAATGCGACGTTACTTAAAAGAAAAGAG  
GAAGAACAGGAAGCTGGCAAAAGAAAACAAACCACTCATCCCACAGCCTCAGATTCTGGG  
ACTTACAGCCTCACCTGGTGTAGGAGGTGCAACATCCAACTCAAAGCTGAAGAACATATT  
CTGAAAATCTGTGCCAATCTTGATGCACGTAGAATCATGACTGTTGAAGAGCATGCTGCCC  
AATTGAAGAATCAAGTGAAGGAACCATATAAGAAGACTGTGATTGCAGATGACAAAAGAAG  
GGATCCATTTAGAGAGAGAATTACTGAGATCATGAGAGACATTCAAACCTATTGCCAACTCT  
ATCCAAAATCTGAGTTTGGAACTCAGCCATATGAACAGTGGGTGATTAGAGAAGAGAAAAA  
AGCTGCAAAAGAAGAAAAACGCAAGGAACGTGTCTGTGCAGAACACTTGAAGAAATACAAT  
GATGCACTCCAGATAAATGACACTATCCGAACCGTGGATGCATACAATCACCTAAACAACCT  
TTTATAAGGAGGAGAGAAAAGTAAGAAGACAGTAAGGAGTGATGATGATGATGATGAACC  
AGCAGTATCAAAACAGGATGAAACAGATGAATTTCTAATAGGTTTATTTTCATGCCAAAAAGA  
AACAGCTGAAAGAGTTGGCTAGAAAGCCAGAATATGAAAATGAGAAGCTAATACAGTTGCG  
AAACACTTTAATGGAGGAGTTCACGAAGACCGAAGAACCTAGAGGAATTATTTTCACAAAG  
ACTCGGCTAAGTGCCTTTGCTCTATTCCAGTGGATTAAGGATAACCCAAAATTTGAAGAAGT  
GGGAATTAAGGCCCATTTATCTTATTGGTGCTGGACATAACAGTGAAATTAACCCCATGACTC  
AGAATGAGCAAAGGGAAGTCATTGATAAATTCCGAGGTGGAAGTGTAATTTACTTATTGCT  
ACTACTGTAGCTGAGGAAGGCCTAGACATCAAAGAGTGTAACATCGTTATTCGCTATGGCC  
TCGTACCAATGAAATTGCTATGGTGCAGGCTCGTGGTGCAGCTCGAGCTGATGAGAGCA  
CCTATGCACTTGTGGCTTCAAGTGTCTCAGGAGCTGTTGAACGTGAAGATGTTAATATTTTC  
CGTGAGAAAATGATGTATAAGGCCATTACAGCGTGTCCAGAACATGCCGCAGGAAGAGTATT  
TAAAGAAGATTCAGAATTTGCAGTTGCAAAGTATAGTGGA AAAACAAATGAAGGCCAAAGAG  
AGATCAGCACAAAGACATACAAAAAAATCCTTCACTAGTAACATTCCATTGCAAAAATTGCC  
ACAAGCTGGTATGTTCTGGAGAAGACATACAAGTTATTGAAAACATGCATCATGTCAGTGT  
GAAAAAAGACTTCCAACTCTTTACAATACAAGAGAAAATAAGACGCTGCAAGATAAGCATG  
CCGATTACCAGACAAATGGGGAAATTATATGTAAAGATTGTGGACAAGCTTGGGGAAATAT  
GATGGTTACCGAGGTCTTGACCTGCCTTGTCTAAAGATTAGAAATTTTGTGGTTGTGTTTG  
AAGACAAGAAAACAACAAGCACATTTTTTAAGAAATGGGGAGAAGCTGCCTGTCAGGTTTCC  
TAGTTTAGATTATGCAGCTCATTGTCTTCAAGTGATGAAGATTAA

>hirundo\_rustica-md5

ATGGCAGAGGGCACCCGCGACGAGCGGTTCTCTACATGCTCTCCTGCTTCAGGCCGCG  
GCTGAAGCAGTTCATCCAGGCGCAGCCCGTGCTGGACCGGCTCCCGTCGCTGAGCGCGG  
AGGACAGGGACAGGGTGCGTGCGGCCGTCGCGCAGCGCGGCGCGGCGGGCGCGCGG  
AGGAGCTGCTGCGGGCCGTGGAGCGGGGGCCCCGCGGCGGCGGCTGGATCCGCGAGTT  
CCTGCAGGCGCTGGAGCACGGTGGCTGCGCCCTGGCCGCCTGCTACGCCAACCCAGCC  
TGAGCCAGCTGCCCTCGCCGGCGCAGGAGGCCGAGCACGACCACTGCGTGCGCCTGGT  
GCAGCTGCTGCACGGCACGCTGGTGGACAGGATGCGCACCGTCCCCGTGGCCGAGAAGT  
GCCTGGAGATGGGAATCTTCCAGGACGAGGACGTGGATCGGATCCAGGCTGTTACTGACA  
ATCATGGGAACAGAGATGGTGCAAGGGAGCTACTGAGCAGAATAGTCCAGAAGAAAGACT  
GGTTCTCGTCTTTTTTAGTTGCTCTCCGTGAGACCCAACATGAAGACCTTGCAGATGATTTA  
AGTGGAAATACAGGAGAGAATAAAGAAAATGGGATGGAGCAGACTACAAACAAAGAGACA  
GAAGTTGCATGCCAACCTGGATACGTCATAGAGGAGAATTTGAAACGGGAAGAAAATGTG  
GATGATAGTTTCAGCAGTGAGAACAATGTGTTGAAACATCCATAGAAAAGAATTCTGTGG  
TGTCAGAGTCAGATGTCTCCATAGGAGATGGAAGTGTGAGTAACCTGAACGAAAACCTGGG  
AGAGAGCTGCACAACCAGTGATTGAGATGAAGTGGAGAGGAGAGCCTCACCTCAGCCAGA

CCTGACCCTGAGAGATTACCAGATGGAAGTTGCAAAGCCAGCACTGAACGGGGAAAATAT  
TATAATATGTCTCCCTACGGGCAGTGGTAAAACCAGAGTGGCTGTTTACATTACCAAAGAT  
CACTTGGATAAGAAGAAAAGAGCATCAGAGCCTGGAAAAGTCATAGTACTTGTTAATAAGG  
TTCCATTGGTAGAACAGCATTTACAAACAGAGTTTGGTCCATTCTGAAGCGTTGGTATCAG  
GTTATTGGTTTAAGTGGTGACTCTCAGCTGAAAATCTCATTTCTGAAGTTGTCAGAAAGAA  
TGATGTCATCATCAGTACAGCACAGATCCTTGAGAATTCAGTGTTAAATGCATCCAAAGAAG  
ATGAAGAAAGTGTCCATTTATCAGATTTTTCCCTCATCATTATCGATGAGTGTATCACACT  
CAAAAGGAAGGTGTCTACAACAATATAATGCGACGTTACTTAAAAGAAAAGATGAAGAACA  
GGAGGCTGGCAAAAGAAAATAAACCCTGATCCCACAACCTCAGATTCTGGGTCTTACAGC  
CTCACCTGGTGTAGGAAGTGCAACATCCTACTCGAAAGCAGAAGAGCATATTTTGAAAATC  
TGTGCCAATCTCGATGCATGTAGAATTATGACTGTTGAAGAGCATGCCTCCCAGCTAAAGA  
ATCAGGTGAAGGAACCGTCTAAGAAGACTGTGATTGCAGATGACAAAAAAGGGATCCATT  
TAAAGAGAGAATTACTGAGATCATGACAGAAATACAAAATCTATTGCCAGCTGCATCCCAAGT  
CTGAGTTTGGAACTCAGACATATGAACAGTGGGTGATCAGAGAAGAAAGAGAGCTGCAAA  
AGAAGAAAAACGCAGGGAACGTGTCTGTGCAGAACACTTGAAGAAATACAACGATGCTCTC  
CAGATAAATGACACCATCCGAATGGTGGATGCCTACAATCACCTAATGAACTTTTATAAAGA  
GGAGAAAAGTAAGAAGACAGTAAGGAGTGATGATGAGGAGGAGGAGGATGATGGTCAACC  
AGTAGTATCTAAACAGGATGAAACAGATGAATTTCTAATAGGTTTATTTTCATGCAAAAAAGA  
AACAGCTGGAAGAGTTGACTAGAAAGCCAGAAAATGAAAATGAGAAGCTAATAAAGTTGAG  
AAATACTTTAATGGAGGAGTTCACAAAGACTGAGGAACCTCGAGGAATCATTTTCACAAAG  
ACACGTCTAAGTGCCTTTGCTCTATTCCAGTGGATAAAGGACAACCCAAAATTTGAAGAAGT  
GGGAATTAGGGCCCATTATCTTATTGGCTCTGGACATAAAAGTGAAATGAAGCCCATGACT  
CAGAATGAGCAAAGGGAAGTTATTGATAAATTCGACAGGGAAATGTAAATTTACTAATTGC  
TACTACTGTAGCTGAGGAAGGCCTGGACATCAAGAGTGTAACATCGTTATTCGCTATGGC  
CTCGTCACCAATGAAATTGCAATGGTGCAGGCTCGTGGTAGAGCTCGAGCTGATGAAAGC  
ACCTATGCTCTTGTGGCTTCGGGTGGCTCAGGGGCTGTGGAACGGGAAGATGTTAATATTT  
TTCGTGAGAAAATGATGTATAAGGCCATACAGCGTGTCCAGAAGATGCCACAGGAAGAGTA  
TTTAAAGAAGATTGAGAGTTTCCAGTTGCAAAGTATAGTGGA AAAACAAATGAAGACAAAGA  
GAGAACAGCTCAAGACATACAAGAAAAATCCTTCACTAATAAAAATTCTTATGCAAAAATTGC  
TCCAAGCTGATATGTTCCGGAGAAGACATACAAGTTATTGAAAACATGCATCATGTCAAGTGT  
GAAAAAAGATTTCCAAAGTCATTATCATACAAGAGAAAATAAAACACTGCAGGATAAGCATG  
CCGATTACCAGACAAATGGGGAAATTATATGCAAAGACTGTGGACAAGCTTGGGGAAATAT  
GATGGTTCACCGAGGTCTTGACCTGCCTTGTCTAAAGATTAGAAATTTTGTCAATTGTGTTTG  
AAGACAAGAGAGCAACAAAGCAAATTTTTAAGAAATGGGGAGATCTGCCCATCAGGTTTCC  
TAGTTTTGATTATGCAGCTCATTGTCTTCAAGTGATGAAGATTAA

>hydrobates\_tethys-mda5

ATGGCAGAGGAGTCCCGGGACGAGCGCTTCCTCTACCTGATCTCCTGCTTCAGGCCGCG  
GCTGAAGCAGTTCATCCGGGTGCAGCCGGTGCTGGACCGGCTTCCCTCGCTGAGCGTAG  
GGGAGAGGGAGAAGGTGCGGGCGGCCGCCCTGTACGGGGGCGAGGTGGAGGGGGCGG  
AGGAGCTGCTGCGGGTCGTGGAGCGGGGGCCCCGCGGGTGCGGCTGGTTCAACGAATT  
CCTGCAGGCGCTGGAGTACGGTGGCTGCAGCCTGGCTACCTGCTACGTGAACCCCAGCC  
TCAGCCAGCTGCCCTCGCCGGCGGAGGAGGCCGACCACGACCTCTGCGTGCAGTTGGTG  
CAGCTGCTCCACAGCACACTGGTGGATAAAATGCAGACCATGCAGGTGGCCGAGAAGTGC  
CTGCAGATGGGCATCTTCCAGGACGAGGACCTGGATCGGATCCACACTGTTACTGACAAT



CGTGGGAACAGAGATGGTGCAAGGGAGCTATTGAGCAGAATAGTGCAGAAGAAAGATTGG  
TTCTCTCCTTTTTTTGATTGCCCTGCGTGAAACCCAACATGGAGGCCTCGCAGATGATTTAA  
GCGGAAATACAGGAGGAGCAGAGAATAGACAAAATGAGATGAAGAACAGTACAAACGAAG  
AAACAACAGTTACAAGCCAACCAGGATATGCCGTAGTGGAGGATTTGAAACTGCAAGAAAA  
TGTGAATGATAGTTTCAGCAGTGAGAACAGTGTATTGAAAGCATCTATTGGAAAGAATTCTG  
TAGTTTCAGAATCAGATGTCTCCATAGGAGATGGAAGTGTGAGTAACCTGAATGAAAACCT  
GGGACAGAGCAGCACAAACCAGTGATTGAGATGAAGATGAAGTGGAGAGCAGAGCTTCACC  
TGAGCCAGATCTGATCCTGAGAGATTACCAGATGGAAGTTGCAAAGCCAGCGCTGAATGG  
GGAGAATATTATAATATGTCTCCCCACAGGCAGTGGTAAAACCAGAGTGGCTGTTTACATT  
ATCAAAGATCACTTGGATAAGAAGAAAAGAGCATCAGAGCCTGGGAAAGTTATAGTACTTG  
TTAATAAGGTACCGTTGGTAGAACAGCATTTACGAAAGGAGTTTAATCCATTCTGAAGCAT  
TGGTATCAGGTTATTGGTTTAAAGTGGTGATTCTCAGCTGAAAATCTCATTTCCTGAAGTTGT  
CAGGGGAAATGATGTCATCATCAGTACAGCACAGATCCTTGAGAATTCAGTGTACATGCA  
GCCGAAGAAGATGAAGAAGGTGTCCACTTGTGAGATTTTTCACTCATCATTATCGATGAGT  
GTCATCACACTCAAAGGAAGGCGTCTACAACAATATAATGCGACGTTACTTGAAAGAAAA  
GATGAAGAACAGGAAGCTGGCAAAGAAAACAAACCACTGATCCCACAGCCTCAGATTCTG  
GGACTTACAGCCTCACCTGGTGTAGGAGGTGCAACATCCTACTCAAAGCTGAAGAACATA  
TTCTGAAAATCTGTGCCAATCTTGATGCATGTAGAATCATGACTGTTGAAGAGCATGCCTCC  
CAATTGAAGAATCAGGTGAAGGAACCGTATAAGAAGACTGTGATTGCAGATGACAAAAGAA  
GGGATCCATTTAGAGAGAGAATTACTGAGATCATGACAGACATTCAAACCTATTGCCAGCT  
CCATCCAAAACCTGAGTTTGGAACCTCAGCCATATGAACAGTGGGTGATTAGAGAGGAGAGA  
AGAGCTGCAAAAAGAAAAACGCAAGGAACGTGTCTGTGCAGAACTTGAAGAAATACA  
ATGATGCTCTCCAGATAAATGACACCATCCGAATGGTGGATGCGTACAATCACCTAAATAA  
CTTTTATAAGGAGGAGAAAAAGTAAGAAGACAGTAAGGAGTGATGATGATGAACCAGCA  
GTATCAAAACAGGATGAAACAGATGAATTTCTAATGGGTTTGTTCATGCAAAAAAGAAACA  
GCTGAAGGAGTTGGCTAGAAAGCCAGAATATGAAAATGAGAAGCTAATACAGTTGCGAAAC  
ACTTTAATGGAGGAGTTCACGAAGACTGAGGAACCTAGAGGAATTATTTTCACAAAGACTC  
GGCTAAGTGCCTTTGCTCTATTCCAGTGGATTAAGGATAACCCAAAATTTGAAGAAGTGGG  
AATTAAGGCCCATATCTTATTGGCGCTGGACATAACAGTGAAATTAACCCATGACTCAGA  
ATGAGCAAAGGGAAGTTATTGATAAATTCCGAGGTGGAAATGTAACTTACTTATTGCTACT  
ACTGTAGCTGAGGAAGGCCTAGACATCAAGGAGTGTAACATCGTTATTCGCTATGGCCTCG  
TCACCAATGAAATTGCTATGGTGCAGGCTCGCGGTGAGCTCGAGCTGATGAGAGCACCT  
ATGCACTTGTGGCTTCGAGTGGCTCAGGAGCTGTTGAACGTGAAGATGTTAATATTTTCCG  
TGAAAAAATGATGTATAAGGCCATTCAGCATGTCCAGAAGATGCCGCAGGAAGAGTATTTA  
AATAAGATTCAGAATTTCCAGTTGCAAAGTATAGTGGAACAAATGAAGGCAAAGAGAG  
ATCAGCGCAAGACATACAAGAAAAATCCTTCACTAGTGACATTCCTATGCAAAAATTGCCAC  
AAGCTGGTATGTTCTGGAGAAGACATACAAGTTATTCAAACATGCATCATGTGAGTGTGAA  
AAAAGATTTCCAAAGTCTTTACCATACAAGAGAAAAATAAGACACTGCAAGATAAGCATGCCG  
ATTACCAGACAAATGGGGAAATTATATGTAAAGATTGTGGACAAGCTTGGGGAAATATGAT  
GGTTCACCGAGGTCTTGACCTGCCTTGTCTAAAGATTAGAAATTTTGTGGTTGTGTTTGAAG  
ACAAGAAAACAAAGCAAATTTTTTAAGAAATGGGGAGAACTGCCCATCAGGTTCCCTAGTTTT  
GATTATGCAGCTCATTGGCCTTCAAGCGATGAAGATTAA

>junco\_hyemalis-md5

ATGGCAGAGGGCACCCGGGACGAGCTGTTCCCTCTACATGATCTCCTGCTTCAGGCCGCGG

CTGAAGCAGTTCATCCAGGTGCAGCCCGTGCTGGACCGGCTGCCCTCGCTGAGCGCCGA  
GGACCGGGACAGGGTCCGTGCGGCCGCCGAGCAGCGGGGCGCGGCGGGCGGGCGCCGA  
GGAGCTGCTGCAGGCCGTGGAGCGGGGGCCCCGCGGCCGCGGCCCGATCCGCGAGTTC  
CTGCAGGCGCTGGAGCACGGCGGCTGCAGCCTGGCCGCCTGCTACGCCAACCCAGCCT  
GAGCCAGCTGCCCTCGCCGGCAGAGGAGGCCGAGCACGACCTCTGCGTGCACCTGGTGC  
AGCTGCTGCACGGCACGCTGGTGGACAGGATGCGCGCCGGGCGCGGTGGCCGAGAAGTG  
CCTGCAGATGGAGATCTTCCAGGACGAGGACGTGGAGCGGATCCAGACTGTTATTGACAA  
TCGTGGGAACAGAGATGGTGCAAGGGAGCTACTGAGCAGAATAGTCCAGAAGAAAGACTG  
GTTCTCTTCTTTTTTATTGCCCTCCGTGAAACCCAAACATGAAGACCTTGACAGATGATTAA  
GTGGAAATACAGGAGAGAATAAACAAAATGGGATGGAGCAGACTACGAGTGAAGAAACAG  
AAGTTACAAGCCAACCAGGATACGTACAGAGGAGAATTTGAAACAGGAAGAAAATGTGGA  
TGACAGTTTCAGCAGTGAGAGCAGTCTGTTGGAACATCCATAGAAAAGAATTCTGTGATG  
TCAGAGTCAGATGTCTCCATAGGAGATGGAAGTGTGAGTAACTTGAATGGAACTTGGAAC  
AGAGCTGCACAACCAGTGATTCAGATGAAGTGGAGAGGAGAGCCTCACCTGAGCCAGATC  
TGACCCTGAGAGATTACCAGATGGAAGTTGCAAAGCCAGCGTTGAATGGGGAGAATATTAT  
CATATGTCTCCCTACAGGCAGTGGTAAAACCAGAGTGGCTGTTTACATTACCAAAGATCAC  
TTGGATAAGAAGAGAAGAGCATCAGAGCCTGGAAAAGTCATAGTACTTGTTAATAAGGTTC  
CATTGGTAGAACAGCATTTAAAAAGAGAGTTTAGTCCATTCCCTGAAGCGTTGGTATCAGGTT  
ATTGGATTAAGTGGTGATTCTCAGCTGAAAATCTCATTTCCCTGAAGTTGTCAGAAGAAATGA  
TGTCATCATCAGTACAGCACAGATCCTTGAGAATTCAGTGTAAATGCATCCAAGGAAGATG  
AGGAAAGTGTCCACTTATCAGATTTTTCCCTCATCATCATCGATGAGTGTGATCATACTCAA  
AAGGAAGGTGTCTACAATAACATAATGAGACGTTACTTAAAAGAAAAGATGAAGAACAGGA  
AGCTGGCAAAAAGAAAACAAGCCGCTGATCCCACAGCCTCAGATTCTGGGACTTACAGCCT  
CACCTGGTGTAGGAGGTGCAACATCCTACTCAAAGCTGAAGAGCATATTCTGAAAATCTG  
TGCCAATCTTGATGCATGTAGGATTATGACTGTTGAAGAGCATGCCTCCCAGCTAAAGAAT  
CAGGTGAAGGAACCATCTAAGAAGACTGTGATTGCAGATGATAAAAAAGGGATCCATTTA  
AAGAGAGAATCACTGAGATCATGACAGAAATACAGAACTATTGCCAGCTGCATCCGAAGTC  
TGAGTTTGGAACCTCAGACATATGAACAGTGGGTGATCAGAGAAGAGAGAAGAGCTGCGAA  
AGAAGAAAAACGGAGGGAACGTGTCTGTGCAGAGCACTTGAAGAAATACAATGATGCTCTC  
CAGATAAATGACACCATCCGAATGGTGGATGCCTACAATCACCTAAATAACTTCTATAAAGA  
GGAGAAAAGTAGGAAGACAGTAAGGAGTGATGATGATGATGATGATGAACCAGCAGTATC  
AAAACAGGATGAAACAGATGAATTTCTAATAGGTTTATTTTCATGCAAAAAAGAAACAGCTGA  
AAGAGTTGACTAGAAATCCAGAAAATGAAAATGAAAAGCTAACGAAGTTGAGAAATACTTTA  
ATGGAGGAGTTCACGAAGACTGAAGAACCTCGAGGAATCATTTTCACAAAGACTCGTCTAA  
GTGCCTCTGCTCTTTTCCGGTGGATTAAGGACAACCCAAAATTTGAAGAAGTGGGAATTAA  
GGCCCATTATCTTATTGGCTCTGGACATAAGAGTGAAACAAAGCCCATGACTCAGAATGAG  
CAAAGGGAAGTTATTGATAAATTTGATGTGGAAATGTAAATTTACTAATTGCTACTACTGTA  
GCTGAGGAAGGCCTGGACATCAAAGAGTGTAACATCGTTATTCGCTACGGCCTCGTCACC  
AATGAAATTGCTATGGTGCAGGCTCGCGGTAGAGCTCGAGCTGATGAAAGCACCTATGCT  
CTTGTGGCTTCAGATGGCTCAGGGGCTGTTGAACGTGAGAATGTTAATATTTTTCGTGAGA  
AAATGATGTACAAGGCGATTACGCGTGTCCAGAAGATGCCACAAGAAGAGTATTTAAATAA  
GATTCAGAGTTTCCAGTTGCAAAGTATAGTGGAAAAACAAATGAAGATGGTGAGAGATCAG  
CGCAAGACATACAAGAAAAATCCTTCACTAATAAAAATTCTTATGCAAAAAGTCTCCAAGCC  
GATATGTTCTGGAGAAGACATACAAGTTATTGAAGACATGCATCATGTGAGTGTGAAAAAG

ATTTCCAAAGTCTTTATCATACAAGAGAAAATAAAACACTGCAAGATAAGCATGCTGATTAC  
CAGACAAATGGGGAAATTATATGCAAAGACTGTGGACAAGCTTGGGGAAATATGATGGTTC  
ACCGAGGTCTTGACCTGCCTTGTCTAAAGATCAGAAATTTTGTGGTTGTGTTTGCAGACAA  
GAAAACAACAAACAATATTTTTAAGAAATGGGGAGACCTGCCCATCAGGTTTCCTAGTTTTG  
ATTATGCAGCTCATTGTCCTTCAAGTGATGAAGATTAA

>lamprotornis\_superbus-mda5

ATGGCAGAGGGCACCCGGGACGAGCTGTTCTCTACATGATCTCCTGCTTCAGGCCGCGG  
CTGAAGCGGTTTCATCCAGGTGCAGCCCGTGCTGGACCGGCTGCCGGCGCTGAGCGCGGA  
CGACAGGGACAGGGTGCGAGCGGCCGCCAGCAGCGGGGCGCGGCGGGCGGGCGCCGA  
GGAGCTGCTGCGGGCCGTGGAGCGGGGGCCCCGCGGCTGCGGCTGGATCCGCGAGTTC  
CTGCAGGCCCTGGAGCAGGGCGGCTGCGGCCTGGCCGCCTGCTACGCCAACCCAGCC  
TGAGCCAGCTGCCCTCGCCGGCAGAGGAGGCCGAGCACGACCTGTGCGTGACGCTGGTG  
CAGCTGCTGCACGGCACGCTGGTGGACAGGATGCGCGCCGTGCCGGTGGCCGAGAAGT  
GCCTGGAGATGGGAATCTTCCAGGACGAGGACATGGATCGGATCCAGACTGTTACTGACA  
ATCGTGGAACAGAGATGGTGCAAGGGAGCTACTGAGCAGAATAGTCCAGAAGAAAGATT  
GGTTCTCTTCTTTCTTGGTTGCTCTCCGTGAAACCCAACATGAAGACCTTGCAATGACTTA  
AGTGGAAATACAGGAGAAAATAAACAAAATGGGATGGAGCAGACTACAAATGAAGAAACAG  
AAGTTACAAGCCAACCAGGATACGTCACAGAGGAGAATGTGAAACAGGAAGAAAATGTGG  
ATGATAGTTTCAGCAGTGAGAACAGTGTGTTGGAAACATCCATAGAAAATAATTCTGTGGCA  
TCAGAGTCAGATGTCTCCGTAGGAGATAGAAGCGTCAGTAACTTGAATGAAAACCTGGGAC  
AGAGCTACACAACCAGTGATTCAGATGAAGAGGAGAGGAGAGCCTCACCTGAGCCAGATC  
TGACCCTGAGAGATTACCAGATGGAAGTTGCAAAGCCAGCACTGAATGGGGAGAATATTAT  
AATATGTCTCCCTACGGGCAGTGGTAAAACCAGAGTGGCTGTTTACATTACCAAAGATCAC  
TTGGATAAGAGGAAAAGAGCATCAGAGCCTGGAAAAGTCATAGTACTTGTTAATAAGGTTT  
CATTGGTAGAACAGCATTTACAAAGAGAGTTTAGTCCATTCTGAAGCGTTGGTATCAGGTT  
ACTGGTTTAAGTGGTGATTCTCAGCTGAAAATCTCATTTCTGAAGTTGTCAGAAGAAATGA  
TGTCATCATCAGTACAGCACAGATCCTTGAGAATTCAGTGTAAATGCATCCAAGGAAGAG  
GAAGAAAGTGTCCACTTATCAGATTTTTCCCTCATCATTATCGATGAGTGTATCACACTCA  
AAAGGAAGGTGTCTACAACAATATAATGCGACGTTACTTAAAAGAAAAGATGAAGAACAGG  
AAACTGGCAAAAAGAAAACAAACCACTGATCCACAGCCTCAAATTCTGGGACTTACAGCCT  
CACCTGGTGTAGGAGGTGCAACATCCTACTCAAAGCTGAAGAGCATATTCTGAAAATCTG  
TGCCAATCTTGATGCATGTAGAATTATGACTGTTGAAGAGCATGCCTCCCAATTGAAGAATC  
GGGTGAAGGAACCTTCTAAAAAACTGTGATTGCAGATGACAAAAAAGGGATCCATTTAA  
AGAGAAAATTACTGAGATCATGACAGAAATTCAAAACCTATTGCCAGCTGCATCCAAAGTCTG  
AGTTTGGAACCTCAGACATATGAACAGTGGGTGATCAGAGAAGAGAGAAGAGCTGCAAAAG  
AAGAAAAACGCAGGGAACGTGTCTGTGCAGAGCACTTGAAGAAATACAATGATGCTCTCCA  
GATAAATGACACCATCCGAATGGTGGATGCCTACAATCACCTAAATAACTTTTATAAGGAGG  
AGAAAAGTAAGAAGACAATAAGGAGTGATGATGATGATGATGATGAACCAGCAGTATCAAA  
ACAGGATGAAACAGATGAATTTCTAATAGATTTATTTTCATGCAAAAAAGAAACAGCTGAAAG  
AGTTGACAGGAAAGCCAGAATATGAAAATGAGAAATTAATAAAGTTGAGAAATACTTTAATG  
GAGGAATTCACAAAGACTGAGGAACCTCGAGGAATCATTTTCACAAAGACTCGTCTAAGTG  
CCTTTGCTCTATTCCAGTGGATTAAGGACAACCCAAAATTTGAAGAAAGTGGGAATTAGGGC  
CCATTATCTTATTGGCTGTGGACATAAGAGTGAAATGAAGCCCATGACTCAGAATGAGCAA  
AGGGAAGTTATTGATAAATTTGACATGGAAGTATAAATTTACTAATTGCTACTACTGTAGCT

GAGGAAGGCCTGGACATCAAAGAGTGTAACATCGTTATTCGCTACGGCCTCGTCACCAAT  
GAAATTGCTATGGTGCAGGCTCGTGGTAGAGCTCGATCTGATGAAAGCACCTATGCTCTTG  
TGGCTTCAAGTGGCTCAGGGGCTGTTGAACGTGAAGATGTGAATATTTTTTCGTGAGAAAAT  
GATGTATAAGGCCATTCAGCGTGTCCAGAAGATGCCACAGGAAGAGTATTTAAATAAGATT  
CAGAGTTTCCAGTTGCAAAGTATAGTGGAAAAACAAATGAAGGCAAAGAGAGATCAGTGCA  
AGACATACAAGAAAAATCCTTCACTGATAAAATTCTTATGCAAAAATTGCTACAAGCCGATA  
TGTTCTGGAGAAGACATACAAGTTATTGAAGACATGCATCATATCAGTGTGAAAAAAGATTT  
CCAAAGTCTTTATCATACAAGAGAAAAATAAAACACTGCAAGATAAGCATGCCGATTACCAAA  
CAAATGGGGAAATTATATGCAAAGACTGTGGACAAGCTTGGGGAAATATGATGGTTACCCG  
AGGTCTTGACCTGCCTTGTCTGAAGATTAGAAATTTTGTGGTTGTGTTTGCAGACAAGAAAA  
CAACAAAGCAAATTTTTAAGAAATGGGGAGAGCTGCCCATCAGGTTTCTAGTTTTGATTAT  
GCAGCTCATTATCCTTCAAGTGATGAAGATTAA

>lepidothrix\_coronata-mda5

ATGGAAGAGGGGGACCGGGACGAGAGGTTCTCTACATGATCTCCTGCTTCAGGCCGCG  
GCTGAAGCAGTTCATCCAGGTGCAGCCCGTGCTGGACCAGCTCCCCTCGCTGAGCGCGG  
AGGAGAGGGAGAAAGGTGCGGGCGGCCCTCCTGCGGGGGGGCGCTGTGGCGGGGGCCG  
AGGAGCTGCTGCGGGCCGTGGAGCGGGGGCCCCGCGGCTGCGGCTGGTTCCACGAGTT  
TCTGCAGGCACTGGAGCAGGGCGGCTGTAGCCTGGCCGCCTGCTACGCCAACCCCAGCC  
TCAGCCAGCTGCCCTCGCCGGCCGAAGAGGCCGACCACGACCTCTGCGTGCACCTGGTG  
CAGCTGCTCTACAGCACGCTGGTGGACAGGATGCGGGCCGTGCAGGTGGCCGAGAAGTG  
CCTGGAAATGGGCATCTTCAAGGAGGAGGACCTGGAGCGGATCCAGACTGTTACTGACAA  
TCGTGGGAACAGAGAGGGTGCAAGGGAGCTTCTGAGCAGAATAATGCAGAAGAAAGATTG  
GTTCTCTCCTTTTTTATTGCTCTCCGTGAAACCCAACATGGAGACCTGGCAGATGATTTAA  
GTGGAAATACAGGAGGAACAGAGAATAGACAAAATGAGATGAAGAACAGTACAAATGAAGA  
AACAGAAATTACAAGCCAACCAGGATATGCCACAGTGGAGGATTTGAAACAGCAAGAAAAT  
GTGAATGATAGTTTCATCAGTGAGAACAGTGTATTGGAAACATCCATGGGAGAGAATTCTG  
TAGATTCAGAGTCAGATGTTTCCATAGGAGATGGAAGTGTCCGTAACCTTCAGTGAAAACCT  
GGGTCAGAGCTGCACAACCAGCAATTCAGATGAAGAGGAGAGGAGAGCTTCACCTGAGCC  
AGATCTGACCCTGAGAGATTACCAGATGGAAGTTGCAAAGCCAGCACTGAATGGGGAGAA  
TATTATAATATGTCTCCCTACAGGCACTGGTAAAACCAGAGTGGCTGTTTACATTACCAAAG  
ATCACTTGGATAAGAAGAAAAGATCATCAGAGCCTGGAAAAGTCATAGTACTTGTTAATAAG  
GTACCACTGGTACAACAGCATTTAGAATCAGAGTTTCATCCATTCTGAAGCGTTGGTATCA  
GGTTATTGGTTTAAGTGGTGATTGTCAACTGAAAATCTCGTTTCCTGAAGTTGTCAGAAGAA  
ATGATGTCATCATCAGTACAGCACAAATCCTTGAGAATTCAGTATAATGCAGACAAAGAA  
GATGAAGAAGGTGTCCACTTATCAGATTTTTCCCTTATCATTATTGATGAGTGTGCATCACAC  
GCAGAAGGAAGGTGTCTACAACAATATAATGCGACGTTACTTAAAAGAAAAGATGAAGAAC  
AGGAAGCTGGCAAAAGAAAACAAACCACTGATCCACAGCCTCAGATTCTGGGACTTACAG  
CCTCACCTGGTGTAGGAGGTGCAAGATCCTACTCAAAGCTGAAGACCATATTCTGAAAAT  
CTGTGCCAATCTTGATGCATGTAGAATTATGACTGTTGAAGAGCATGAGGACCAGTTAAAG  
AATCAGGTGAAGGAGCCGTCCAAGAAGACTGTGGTTGCAAATGACAAAAAAGGGATCCA  
TTTAGAGAGAAAATTACTGAGATCATGACAGAAATACAAAACCTATTGCCAGCTCCATCCAAA  
ATCCGAGTTTGGAACTCAGACATATGAACAGTGGGTGATCAGAGAAGAGAGAAGAGCTGC  
AAAAGAAGAAAAACGCAAGGAACGTGTCTGTGCAGAACACTTGAAGAAATACAATGATGCT  
CTCCTGATAAATGACAGTATCCGAATGGTGGATGCATACAATCACCTAAATAACTTTTATAA

GGAGGAGAAAAGTAAGAAGACAGTAAGGAGTGATGATGATGATGATGAACCAGCTGTATC  
AAAACAGGATGAAACAGATGAATTTCTAATAGGTTTATTTTCATGCAAAAAAGAAGTGGCTGA  
AAAAGTTGGCTGGAAAGCCAGAACATGAAATGAGAATCTAATACAGTTGCGAAATACTTTA  
ATGGAGGAGTTCACGAAGACTGAGGAACCTAGAGGAATTATTTTCACAAAGACTCGTCTAA  
GTGCCTTTGCTCTATTCCAGTGGATTCAAGACAACCCAAAATTTAAAGAAGTGGGAATTAAG  
GCCCATTATCTTATCGGCTCTGGACATAACAGTGAATGAAACCCATGACTCAGAATGAGC  
AAAGGGAAGTTATTGATAAATTCCGATGTGGAAATTTAAATTTACTTATTGCTACTACTGTAG  
CTGAGGAAGGCTTGGACATCAAAGAGTGTAACATCGTTATTTCGCTATGGCCTTGTACACAA  
TGAAATTGCTATGGTGCAGGCTCGTGGTTCGAGCTCGAGCTGATGAGAGCACCTATGCTCT  
TGTGGCTCCGAGTGGCTCAGGAGCTGTTGAACGTGAAGATGTCAATATTTTCCGTGAGAAA  
ATGATGTATAAGGCCATTTCAGCGTGTCCAGAAGATGCCACAGGAAGAGTATTTAAATAAGA  
TTCAGAATTTCCAGTTGCAAAGTATAGTGGAAAAACAAATGAAGGCCAAAGAAAGATCAGCG  
CAAGACATACAAGAAAAATCCTTCACTAATAACATTCTTATGCAAAAATTGCCACAAAACGA  
TATGTTCTGGAGAAGACATACAAGTTATTGAGAACATGCATCATGTCAAGTGTGAAAAAAGAT  
TTCCAAAGCCTTTATCATACAAGAGAAAATAAGACACTGCAAGATAAGCATGCCGATTACCA  
GACAAATGGGGAAATTATATGTAAAGATTGTGGACAAGCTTGGGGAAATATGATGGTTCAC  
CGAAGCCTTGACCTACCTTGTCTGAAGATTAGAAATTTTGTGGTTGTGTTTGCAGACAAGAA  
AACAACAAAGCAAATTTTAAAGAAATGGGGAGAACTGCCCATCAGGTTTTCTAGTTTTGATT  
ATGCAGCTCATTGTCCTTCAAGTGATGAAGATTAA

>leptosomus\_discolor-mda5

ATGGCGGGGGAGTGCCGAGACGAGCGCTTCCTCTACATGATCGCCTGCTTCAGGCCGCG  
GCTGAAGCAGTTCATCCGGGTGCAGCCGGTGCTGGACCTGCTTCCCTCGCTGAGCGCCG  
AGGACAGGGAGAAGGTGCGGGCGGCCGCCCGGCAGCGGGGCGAGGKGGAGGGGGCGG  
AGGAGCTGCTGCGGGCCGTGGAGCGGGGTCCCCGCGGGTGCGGCTGGTTCCACGAGTT  
CCTGCAGGCGCTGGAGSGCGGTGGCTGCAGCCYGGCCGCCTGCTACGTGAACCCAGCC  
TCAGCCAGCTGCCCTCGCCGGCCGAGGAGGCTGACCACGACCTCTGCGTGCATTTGGTG  
CAGCTGCTCCACAGCACCTTGGTGGACAAAATGCAGGCCGTGCAGGTGGCCGAGAAGTG  
CCTGCAGATGGGAATCTTCCAGGACGAGGACCTGGATCGGATCCACACTGTTACTGAACA  
CTGTGGGAACAGAGATGGTGAAGGGAGCTATTGAGCAGAATAGTGCAGAAGAAAGATTG  
GTTCTCGCCTTTTTTATTGCTCTGCGTGAAACCCAACATGGAAGCCTTGCAGATGATTTAA  
GCGGAAATACAGGAGGAACAGAGAATAGACAAAATGGGATGAAGAAAAGTACAAACGAAG  
AAACAGAAGTTACAGACCAACCAGGATATGCCGTAGTGAGGATTTGAAAGAGCAAGAAA  
GTGTGAGTGATAGTTTCAGCAGTGAGAACAGTGTATTGGAAACGTCTATTGGAGAGAATTC  
TGTAATTTTCAGATTTCTTCATAGAAGATGGAAGTGTCAAGTGAAGTGGAGAGCAGAGCTTCACCTGAGC  
CAGATCTGATCCTGAGAGATTACCAGATGGAAGTTGCAAAGCCAGCACTGAATGGGGAAA  
ATATTATAATATGTCTCCCTACAGGCTCTGGTAAAACCAGAGTGGCTGTTTACATTACCAAA  
GATCACTTGGATAAGAAGAAAAGAGCATCAGAGCCTGGAAAAGTTATAGTACTTGTTAATAA  
GGTACCGTTGGTAGAACAAACATTTACAAAAGGAGTTTAAATCCATTCTGAAGCGTTGGTATC  
AGGTTATTGGTTTAAAGTGGTGATTCTCAGCTGAAAATCTCATTTCTGAAGTTGTCAGAAGA  
AATGATGTCATCATCAGTACAGCACAGATCCTTGAGAATTCAGTGTAAATGCAACCAAAGA  
AGATGAAGAAGGGGTCCACTTATCAGATTTTTCACTCATCATTATCGATGAGTGCCATCACA  
CTCAAAGGAAGGTGTCTACAACAATATAATGCGACGTTACTTAAAAGAAAAGATGAAGAAC  
AGGAAGCTGGCAAAAGAAAACAAACCTCTGATCCCACAGCCTCAGATTCTGGGACTTACAG

CCTCACCTGGTGTAGGAGGTGCAACATCCTACTCAAAGCTGAAGAACATATTCTGAAAAT  
CTGTGCCAATCTTGATGCATGTAGAATCATGACTGTCTGAAGAGCATGCCTCCCAATTGAAG  
AATCAGGTGAAGGAACCGTATAAGAAGACTGTGATTGCAGATGACAAAAGAAGGGATCCAT  
TTAGGGAGAGAATTACTGAGATCATGACAGACATTCAAAGTATTGCCAGCTCCATCCAAA  
ATCTGAGTTTGAACCCAGCCGTATGAACAGTGGGTGATTAGAGAAGAGAGAAAAAGCTGC  
TAAAGAACAAAAACGCAAGGAACGTGTCTGTGCAGAACACTTGAAGAAATACAATGATGCT  
CTCCAGATAAATGACACCATCCGAATGGTGGATGCATACAATCACCTCAATAACTTTTACAA  
GGAGGAGAAAAAGTAAGAAGACAATAAGGAGTGATGATGATGATGATGATGATGAACCAGC  
AGTATCAAAACAGGATGAAACAGATGAATTTCTGATAGGTTTATTTTCATGCAAAAAAGAAAC  
AGCTGAAAGAGTTGGCTAGAAAGCCAGAGTATGAAAATGAGAAGCTAACACAGTTGCGAAA  
CACTTTAATGGAGGAGTTCACGAAGACCGAGGAACCTAGAGGAATTATTTTCACAAAGACT  
CGTCTAAGTGCCTTTGCTCTGTTCCAGTGGATTAAGGATAACCCAAAATTTGAAGAAGTGG  
GAATTAAGGCCATTATCTTATTGGTGGTGGACATAACAGTGAAATTAACCCATGACTCAG  
AATGAGCAAAGGGAAGTTATCGATAAATCCGAGGTGGAAATGTAAATTTACTTATTGCTAC  
TACTGTAGCCGAGGAAGGCCTAGACATCAAAGAGTGTAACATCGTTATTTCGCTATGGCCTC  
GTCACCAATGAAATTGCTATGGTGCAGGCCCGCGGTGAGCTCGATCTGATGAGAGCACC  
TATGCACTTGTGGCTTCAAGTGGCTCAGGAGCTGTTGAACGTGAGGATGTTAATATTTTCC  
GTGAGAAAATGATGTATAAGGCCATTACGCGTGTCCAGAAGATGCCGCGGGAAGAGTATTT  
GAATAAGATTCAGAATTTCCAGTTGCAAAGTGTAGTGGAACAAATGAAGGCAAAGAGA  
GATAAGTGCAAGACATACAAGAAAAATCCTTCACTAATAACATTCCTATGCAAAAATTGCCA  
CAAGCTGGTATGTTCTGGAGAAGACATACAAGTTATTGAAAATATGCATCATGTCAGTGTGA  
AAAAAGATTTCCAAAGTCTTTACCATACGAGAGAAAAACAAGACACTGCAAGATAAGCATGC  
CGATTACCAGACAAATGTCGAAATTATATGTAAAGACTGTGGACAAGCTTGGGGAAATATG  
ATGGTTCACCGAGGTCTTGACCTGCCTTGTCTAAAGATTAGAAATTTTGTGGTTGTGTTTGA  
AGACAAGAAAAACAACAAAGCAAATTTTTAAGAAATGGGGAGAACTGCTTGTGAGGTTCCCT  
AGTTTTGATTATGCAGCTCATTGTCTTCAAGTGATGAAGATTAA

>lichenostomus\_cassidix-mda5

ATGGCGGAGGGGAGCCGGGACGAGCGGTTCTCTACATGATCTCCTGCTTCAGGCCGCG  
GCTGAAGCAGTTCATCCAGGTGCAGCCCGTGTGGACCGGCTGCCGTGCTGAGCGCGG  
AGGACAGGGAGCGGGTGCGGGCGGCCGCCCTGCAGCGGGGCGAGGTGGCGGCGGCGG  
AGGAGCTGCTGCGGGCCGTGGAGCGCGGGCCCCGCGGCTGCGGCTGGATCGGCGAGTT  
CCTGCAGGCGCTGGAGCACGGCGGCTGCAGCCTGGCCCTCTGCTACGCCAACCCAGCC  
TGAGCCAGCTGCCCTCGCCGGCAGAGGAGAACGAGCACGACCAAGTGCCTGCACCTGGTG  
CAGCTGCTGCACGGCACTCTGGTGGACAGAATGCGGGCCGCGCAGGTGGCCGAGAAGTG  
CCTGGAGATGGGCATCTGCCAGGACGAGGACGTGGATCGGATCCAGGCTGTTACTGACA  
CTCGTGGAACAGAGAGGGTGCAAGGGAGCTACTGAGCAGAATAGTGCAAAAGAAAGACT  
GGTTCTCTTCTTTTTTGTGTTGCTCTCCGTGAAACCCAACATGAAGACCTTGCAGATGAATTA  
AGTGGAAATACAGGAGGAACAGAGAATAAACAAAATGGGATGGAGAACAGTACAAATGAA  
GAAACAGAAGTTACAAGCCAACCAGGATATGTCATAGCGGAGAAATTTGAAACTGGAAGAAA  
ATGTGGATGATAGTTTCTGCAGTGAGAGCAGTATATTGAAACATCCATAGAAAAGAATTCT  
GTGGTGTGAGAGTCAGATGTCTCTATTGGGGATGGAAGTGTGAGTAAGTGAATGAAAACC  
TGGGACAGAGCTGCACAACCAAGTATTGAGATGACATGGAGAGGAGAGCTTCACCTGAGC  
CAGATCTGACTCTGAGAGATTACCAGATGGAAGTTGCCAAGCCAGCACTGAATGGGGAGA  
ATATTATAATTTGTCTCCCTACAGGCAGTGGTAAAACCAGAGTGGCTGTTTACATTACCAA

GATCACTTGGATAAGAAGAAAATAGCATCAGAGCCTGGAAAAGTCATGGTACTTGTTAATAA  
GGTGCCATTGGTAGAACAGCATTTACATGGAGAGTTTAATCCATTCTGAAGCGTTGGTAT  
CGGGTTACTGGTTTAAGTGGTGATTCTCAGCTAAAAATCTCATTTCTGAAGTTGTCAGAAG  
AAATGATGTCATCATTAGTACAGCACAAATCCTTGAGAATTCAGTGTCAAATGCAGCCAAGG  
AAGATGAAGAAAGTGTCCACTTATCAGATTTTTCCCTCATCATTATCGATGAGTGTATCAC  
ACTCAAAGGAAGGTGTCTACAACAATATAATGCGACGTTACTTAAAGGAAAAGATGAAGA  
ACATGAAGCTGGCAAAAGAAAACAAACCACTGATCCCACAGCCTCAGATTCTGGGACTTAC  
AGCCTCACCTGGTGTAGGAGATGCAACATCCTACTCAAAGCTGAAGAGCATATTCTGAAA  
ATCTGTGCCAATCTTGATGCATGTAGAATTATGACTGTTGAAGAGCATGCCTCCAGCTAAA  
GAATCAGGTGAAGGAACCATCTAAGAAGACTGTGATTGCAGATGACAAAAAAGGGATCCA  
TTTAGAGAGAGAATTAGTGAGATCATGACAGAAATACAAAATCTATTGCCAGCTGCATCCAAA  
ATCTGAGTTTGGAACTCAGACATATGAACAGTGGGTGATCAGAGAAGAGAAAAGAGCTGCA  
AAAGAAGAAAACGCAAGGAACGTGTTTGTGCAGAGCACTTGAAGAAATACAATGATGCTC  
TCCAGATAAATGACACTATACGAATGGTGGATGCCTACAATCACCTAAATAACTTTTATAAA  
GAGGAGAAAAGTAAAAAGACAGTAAGGAGTGATGATGAAGATGATGATGAAGAACCAGCA  
GTATCAAAACAGGATGAAACAGATGAATTTCTAATAGGTTTATTTTCATGCAAAAAAGAAACA  
GCTGAAAGAGTTGACTGGAAAGCCAGAATATGAAAATGAGAAGCTAATGAAGTTGCGAAAT  
ACTTTAATGGAGGAGTTCACGAAGACTGAGGAACCTCGAGGAATTATTTTCACAAAGACTC  
GTCTAAGTGCCTTTGCTCTAGTCCAGTGGATTAAGGACAACCCAAAATTTGAAGAAGTGGG  
AATTAAGGCCCATATCTTATTGGCTCTGGAAATAGCAGTGAAGTGAAGCCCATGACTCAG  
AATGAGCAAAGGGAAGTTATTGATAAATTTGGAAGAGGAAATGTAAATTTACTTATTGCTAC  
TACTGTAGCTGAGGAAGGCCTGGACATCAAAGAGTGTAACATCGTTATTCGCTATGGCCTC  
GTCACCAATGAAATTGCTATGGTGCAGGCTCGTGGTGCAGCTCGAGCTGATGAAAGCACC  
TATGCTCTTGTGGCTTCAGCTGGCTCAGGGGCTGTTGAACGTGAAGATGTTAATAATTTTC  
GTGAGAAAATGATGTATAAGGCCATTACAGCGTGTCAGGAGATGCCACAGGAAGAGTATTT  
AAATAAGATTCAGAGTTTCCAGTTGCAAAGTATAGTGGAAAAAAAATGAAGGCCAAACAGA  
GATCAGCACAAGACATACAAGAAAAATCCTTCACTTATAAAATTCTTATGCAAAAATTGCTC  
CAAGCTGATATGTTCTGGAGAAGACATACAAGTTATTGAAGGCATGCATCATGTCAGTGTG  
AAAAAAGATTTCCAAAGTCTTTATCATACAAGAGAAAATAAGACACTGCAAGATAAGCATGC  
TGATTACCAGACAAATGGGGAAATTATATGTAAAGATTGTGGACAAGTTTGGGGAAATATGA  
TGGTTACCGAGGTCTTGACCTGCCTTGTCTAAAGATAAGAAATTTTGTAGTTGTGTTTACA  
GACAAGAAAACAACAAAGGAAATTTTTAAGAAATGGGGAGATCTGCCCATCAGGTTTCCTA  
GTTTGGATTATGCAGCTTATTGTCCTTCAAGTGATGAAGATTAA

>limosa\_lapponica-md5

ATGGCGGAGGAGTGCCGAGACGAGCGGTTCTCTACATGATCTCCTGCTTCAGGCCGCG  
GCTGAAGCAGTTCATCCGGGTGCAGCCGGTGCTGGACCGGCTTCCCTCGCTGAGCGCGG  
AGGAGAGGGAGAAGGTGCGGACGGCCGCCCTGCAGCGCGGTGAGGTGGAGGGGGCCG  
AAGAGCTGCTGCGGGCCGTGGAGCGGGGTCCCCGCGGCTGCGGCTGGTTCCACGAGTTT  
TTGCAGGCGCTGGAGCACGGCGGCTGCGGGCTGGCTGCCTGCTACATGAACCCAGCCT  
CAGCCTGCTGCCCTCGCCGGCCGAGGAGGCCGACCACGACCTCTGTGTGCACTTAGTGC  
AGCTGCTCCACAGCACACTGGTGAATAAAATGCTGCCCAGGCAGGTGGCTGAGAAGTGCC  
TACAGATGGGCATCTTCCAGGATGACGACCTGGATCGGATCCCACTGTTACTGACAATCG  
TGGGAACAGAGATGGTGAAGGGAATTTAGAGAGAATAGTGCAGAAGAAAGATTGGTT  
CTCTCCTTTTTTGGTTGCTTTGCGTGAAACCCAACACGGAGACCTTGCAGATGATTTAAGTG

GAATTACAGGAGGAACAGAGAATAGACAAAATGGGATGAACAATACAAATGAAGAAACAGA  
AGTTACAAGCCAACCAGGAGATGCCGCAGTGGAGGATTTGAAACAGCAAGAAAATGTGAA  
TGATGGTTTCAGCAGTGAGAACATTGTATTGGAAACATCTATTGGAAATAATTCTGTAGTTC  
CAGAGTCAGATGTCTCCATAGGAGATGCAAGTGTGAGTAACTTGAATGAAAACCTGGGACA  
GAGCTGTACAACCAGTGATTGAGATGAAGATGAAGTGGAGAGCAGAGTTTCACCTGAGCC  
AGATCTGACCCTGAGAGACTACCAGATGGAAGTTGCAAAGCCAGCACTGAATGGGGAGAA  
TATCATAATATGTCTGCCTACAGGCAGTGGTAAAACCAGAGTGGCTGTTTACATTACCAAAG  
ATCACTTGGATAAGAAGAAAAGAGCATCAGAGCCTGGAAAAGTTATAGTACTTGTTAATAAG  
GTACCGTTGGTAGAACAGCATTTACGAAAGGAGTTTAGTCCATTCTGAAGCGTTGGTATC  
AGGTTATTGGTTTAAGTGGTGATTCTCAGCTGAAAATCTCATTTCTGAAGTTGTCAGAAGA  
AATGATGTCATCATCAGTACAGCACAGATCCTTGAGAATTCAGTGTAAATGCAGCTGAAGA  
TGATGAAGAAGGTGTCCACTTATCAGATTTTTCTCATCATTATTGATGAGTGTGATCACA  
CACAAAAGGAAGCTGTCTACAACAATATAATGCGACGTTACTTAAAAGAGAAGAGGAAGAA  
CAGGAAGCTGGCAAAGAAAACAAACCACTGATCCACAGCCTCAGATTCTGGGACTTACA  
GCCTCACCTGGTGTAGGAGGTGCAACATCTAACTCAAAAGCTGAAGAACATATTCTGAAAA  
TCTGTGCCAATCTTGACGCGTGTAGAATCATGACTGTTAAAGAACATGCTTCCCAGTTGAA  
GAATCAGGTGAAGGAACCATATAAGAAGACTGTGATTGCAGATGACAAAAGAAGGGATCCA  
TTTAGAGAGAGAATTACTGAGATAATGAGAGAGATTCAGAACTATTGCCAGCTCCATCCAAA  
ATCTGAGTTCGGAAGTACGCCATATGAACAGTGGGTGATTAGAGAAGAGAAAAAGCTGCA  
AAAGAAGAAAAACGCAAGGAACGCGTCTGTGCAGAACACTTGAAGAAATACAATGATGCTC  
TCCAGATAAATGACACCATCCGAATGGTGGATGCATACAATCACCTAAATAACTTTTATAAG  
GAGGAGAAAAAGTAAGAAGACAGTAACGAGTGATGATGATGATGATGAACCAGCAGTAT  
CAAAACAGGATGAAACAGATGAATTTCTAATAGGTTTATTTTCATGCAAAAAAGAAACAGCTG  
AAAGAGTTGGCTAAAAAGCCAGAATATGAAAACGAGAAGCTAATACAGTTGCGAAACACTT  
TAATGGAGGAGTTCACGAAGACGGAAGAACCTAGAGGAATTATTTTCACAAAGACTCGGCT  
AAGTGCCTTTGCTCTTTTCCAGTGGATTAAGGATAACCCAAAATTTGAAGAAGTGGGAATTA  
AGGCCCATTATCTTATTGGTGCTGGACATAACAGTGAAATTAACCCATGACTCAGAATGA  
GCAGAGGGGAAGTCATTGATAAGTTCCGAGGTGGAAGTGTAATTTACTTATTGCTACTACT  
GTAGCCGAGGAAGGCCTAGACATCAAAGAGTGTAACATCGTTATTCGCTATGGCCTCGTCA  
CCAATGAAATTGCTATGCTGCAGGCTCGCGGTGAGCTCGAGCTGATGAGAGCACCTACG  
CGCTTGTTGGCTTCAAGCGCCTCAGGAGCTGTTGAACGTGAAGATGTTAATTTTTCCGTGA  
GAAAATGATGTATAAGGCCATTGAGCGTGTCCAGAACATGCCGCAGAAAGACTATTTAAAT  
AAGATTGAGAATTTGCAGTTGCAGAGTATAGTGGAACAAATGAAGGCAAAGAGAGATC  
AGCACAAGACATACAAGAAAAATCCTTCACTAGTAACATTCCTATGCAAAAATTGCCACAAG  
CTGGTATGTTCTGGAGAAGACATACAAGTTATTGAAAACATGCATCATGTCAGTGTGAAAAA  
AGACTTCCAAAGTCTTTACCAAACAAGAGAAAATAAGACACTGCAAGACAAGCATGCCGAT  
TACCAGACAAATGGGGAAATTATATGTAAACAATGTGGACAAGCTTGGGGAAATATGATGG  
TTCACCGAGGTCTTGACCTGCCTTGTCTAAAGATTAGAAATTTTGTGGTTGTGTTTGAAGAC  
AAGAAAACAACAAAGCACATTTTAAAGAAATGGGGAGAACTGCCCATCAGGTTCCCTAGCC  
TTGATTATGCAGCTCATTGTCTTCAAGTGATGAAGATTAA

>lonchura\_striata\_domestica-md5

ATGGCAGAGGGCACCCGGGACGAGCGGTTCTGTACATGATCTCCTGCTTCAGGCCGCG  
GCTGAGGCAGATCATCCAGGCGCAGCCCGTGCTGGACCAGCTCCCCGCGCTGAGCGCGG  
AGGACAGGGACAGGGTGCGTGCGGCCGCGCTGCAGCGCGGCGCGGCGGGCGCGG



AGGAGCTGCTGCGGGCCGTGGAGCGCGGCCCCCGCGGCCGCGGCTGGATCCGCGAGTT  
CCTGCTGGCGCTGGAGCGCGGCGGCTGCGGCCTGGCCGCCTGCTACGCCAACCCCAGC  
CTGAGCCAGCTGCCCTCGCCGGCGGAGGAGGCCGAGCACGACCTCTGCGTGCACCTGGT  
GCAGCTGCTGCACGGCACGCTGGTGGACAGGATGCGCGCCGTGCAGGTGGCCGAGAAG  
TGCTTGCAGATGGGAATCTTCCAGGACGAGGACGTGGATCGGATCCAGACTGTTACTGAC  
AATCGTGGGAACAGAGATGGTGC AAGGGAGTTACTGAGCAGAATAGTCCAGAAGAAAAGAT  
TGGTTTTCTTCTTTTTTGATTGCTCTTCGTGAAACCCAGCATGAAGACCTTGCAGATGATTT  
AAGTGGAAATACAGGAGAGAGTAAACAAAATGGGATGGAGCAGACTACAAATGAAGAAACA  
GAAGTTACAAGCCAACCAGGAAACGTCATAGAGGAGAATTTGAAACAGGAAGAAAATGTGG  
ATGATAGTTTCTGCAGTGAGAGCAGTCTGTTGAAACATCCATAGAAAAGAATTCTGTGGT  
GTCAGAGTCAGATGTCTCCACAGGAGATGGAAGTGT CAGTAACTCGAATGAAAATCTGGAA  
CAGAGCTGTACAACCAGTGATT CAGATGAAGTGGAGAGGAGAGCCTCACCTGAGCCAGAT  
CTGACCCTGAGAGATTACCAGATGGAAGTGGCAAAGCCAGCACTGAATGGGGAGAATATT  
ATAATATGTCTCCCTACAGGCAGTGGTAAAACCAGAGTGGCAGTTTACATTACCAAAGATC  
ACTTGGATAAGAAGAAAAGAGCATCAGAGCCTGGAAAAGTCATAGTACTTGTTAATAAGGT  
TCCGCTGGTAGAACAGCATTAAAAACAGAGTTTAGTCTATTCCTGAAACGTTGGTATCAGG  
TTATTGGTTTAAGTGGTGATTCTCAGCTGAAAATCTCATTTCTGAAAGTTGTCAGAAGAAAT  
GATGTCATCATCAGTACAGCACAGATCCTTGAGAACTCACTTTTAAATGCATCCAAGGAAGA  
TGAAGAAAGTGTCCACTTATCAGATTTTTCCCTCATCATCATCGATGAGTGT CATCACACTC  
AAAAGGAAGGTGTCTACAATAATATAATGAGACGTTACTTAAAAGAAAAGATGAAGAACAGG  
AAGCTGGCAAAGGAAAACAAACCACTGATCGCACAGCCTCAGATTCTGGGACTTACAGCCT  
CACCTGGTGTAGGAGGTGCAACATCCTACTCAAAGCTGAAGAGCATATTCTGAAAATCTG  
TGCCAATCTTGATGCATGTAGAATTATGACTGTTGAAGAGCATGCCTCCCAGCTAAAGAAT  
CAGGTGAAGGAACCATCTAAGAAGACTGTGATTGCAGATGACAAAAAAGGGATCCATTTA  
AAGAGAAAATTACTGAGATCATGACAGAAATACAAAAC TATTGCCAGCTGCATCCAAAGCCT  
GAGTTTGGA ACTCAGACATATGAACAGTGGGTGATCAGAGAAGAGAAAAGAGCTGCAAAA  
GAAGAAAAACGCAGGGAACGTGTCTGTGCAGAGCACTTGAAGAAATACAATGATGCTCTCC  
AGATAAATGACACCATCCGAATGGTGGATGCCTACAATCTCCTAAATAACTTTTATAAAGAG  
GAGAAAAAGTAAGAAGACAGTAAGGAGTGATGATGATGATGATGATAAACCAGCAGTAT  
CAAACAGGATGAAACAGATGAATTTCTAATAGGCTTATTT CATGCAAAAAAGAAACAGCTG  
AAAGAGTTGACTAAACAACCAGAAAATGAAAATGAGAAGCTCATGAAGTTGAGAAATACTTT  
AATGGAGGAGTTCACAAAGACTGAGGAACCTCGAGGAATCATATTCACAAAGACTCGTCTA  
AGTGCCTTTGCTCTTTTCCAGTGGATTAAGGACAACCCAAAATTTGAAGAAGTGGGAATTAA  
GGCCCATTATCTTATTGGCTCTGGACATAAGAGTGAAATGAAGCCCATGACTCAGAATGAG  
CAAAGGGAAGTAATTGATAAATTTGATGTGGAAATGTAAATTTACTAATTGCTACTACTGTA  
GCTGAGGAAGGCCTGGACATCAAGGAGTGTAACATTGTTATTCGCTATGGCCTCGTCACCA  
ATGAAATTGCCATGGTGCAGGCTCGTGGTAGAGCTCGGGCTGATGAAAGCACCTATGCTC  
TTGTTGCTTCAAGTGGCTCAGGGGCTGTTGAACGTGAAAGTGTTAATATTTTTCTGAGAAA  
ATGATGTATAAGGCTATTCAGCGTGTCCAGAAGATGCCACAGGAAGAGTATTTAAATAAGA  
TTCAGAGTTTCCAGTTGCAAAGTGTAGTGGA AAAACAAATGAAGGTGATGAGAGATCAGCG  
CAAGACATAACAAGAAAAATCCTTCACTAATAAAATTTCTTATGCAAAAATTGCTCCAAGTCGAT  
ATGTTCTGGAGAAGACATACAAGTTATTGAAGACATGCATCATGTTAGTGTGAAAAAAGATT  
TCCAAAATCTTTATCATATAAGAGAAAACAAAACACTGCAAGATAAGCATGCTGATTACCAG  
ACAAATGGGGAAATTATATGCAAAGACTGTGGACAAGCTTGGGGAAATATGATGGTTCACC

GAGGTCTTGACCTGCCTTGTCTAAAGATTAGAAATTTTGTGGTTGTGTTTGCAGACAAGAAA  
ACAACAAATGGTATTTTTTAAGAAATGGGGAGACCTGCCATTAGGTTTCCTAGTTTTGATTA  
TGCAGCTCATTGTCCTTCAAGTGATGAAGATTAA

>lorius\_garrulus-mda5

ATGGCAGGGGAGTTGCGAGATGAGCGTTTCCTCTACATGATCTCGTGCTTCAGGCCGCGG  
CTGAAGCAGTTCATCCGGGTGCAGCCGGTGCTGGACCGGCTCCCTTCGCTCAGTGTGGA  
GGACAGGGAGAAGGTGCGGGGCGGCTGCGCGGCAGAGGGGCGAGGTGGAAGGGACGGA  
GGAGCTGCTGCGGGTCTGTGGAGCGGGGACCCCGCGGGTGTGGCTGGTTCCACGAGTTCT  
TGCAGGCGCTTGAGCACAGCGGCTGCGGCATGGCCGCCTGCTACGTGAACCCACGCCTC  
AGCCAGCTGCCGTCTCCGGCCGAGGAGGCTGACCACGACCTCTGCGTGCAATTGGTGCA  
GCTGCTTCACAGCACTCTCGTGGATAGTATGCGGACCGTGCAAGGTGGCCGAGAAGTGCCT  
GCAGATGGGCATCTTCCAGGATGAGGACCTGGACGGGATCCATACTGTTACTGACAGTCG  
TGAAACAGAGAAGGTGCAAGGGAGCTATTGAGCAGATTAGTGCAGAAGAAAGATTGGTT  
CTCTCGTTTTTTGATTGCTCTGCGTGAAACCCAGCATGGAGGCCTTGCAAGATGATTTAAGT  
GGAAATATAGGAGGAACAAAGGATAAACAAAATGGGATGAAGAAAAGTGTAATGAAGAAA  
CGGAAGTTACAAGCCAACCAGATTATGCCATAGTGGAGGACTTGAAGCAGCAGGAAAATAT  
GAATGATAGTTTCAGCAGTGAGAACAAATTTATTGGAAACATCTATTGGAAAGAATTCTGTAG  
TTTCAGAGTCAGATGTCTCTACAGGAGTTGGAAGTGTCAGTAACTTGAATGAAACCCTGAG  
ACAGAGCTGCACAAGCAGTGATTGAGATGAAGAGGAGAGCAGAGCTTCACCTGAGCCAGA  
TCTGGTCCTGAGAGATTACCAGATGGAAGTTGCAAAGCCAGCACTGAATGGGGAGAATATT  
ATAATATGTCTCCCTACAGGCAGTGGTAAAACCAGAGTGGCTGTTTACATTACCAAAGATCA  
TTTGGATAAAAAGAAAAGAGCATCAGAGCCTGGAAAAGTTATAGTCCTTGTTAATAAGGTGC  
CATTGGTAGAACAGCATTTACGAAAGGAGTTTAGTCCATTCCCTGAAGCGCTGGTATCACAT  
TATTGGTTTAAAGTGGTGATTCTCAGCTGAAAATCTCATTTCCCTGAAGTTGTGAGAAGAAATG  
ATGTCATCATCTGTACAGCACAGATCCTTGAGAATTCAGTCTAAATGCAGACAAAGAAGAT  
GAAGAAGGTGTCCACTTATCAGATTTTTTCACTCATCATTATTGATGAGTGTATCACACTCA  
AAAGGAAGGTGTCTACAACAACATAATGCGACGTTACTTAAAAGAAAAAAGAAGAACAGG  
AAATTGGCAAAAGAAAACAAACCACTGATACCACAGCCTCAGATTCTGGGACTTACAGCCT  
CACCTGGTGTAGGAGGTGCAACATCCTATTCCAAAGCTGAAGAACATATTCTGAAAATCTG  
TGCCAATCTTGATGCATGTAGAATCATGACTGTTGAGGAGCATGCCTCCCAACTGAAGAAT  
CAGGTGAAGGAACCTTTTAAGAAGACTGTGATTGCAGATGACAAAAAAGGGATCCATTTA  
GAGAGAGAATAACTGAGATCATGACAGAGATTCAAACTATTGCCAGCTTCATCCAAAATCT  
GAGTTTGGAACTCAGCCATATGAACAGTGGGTGATCAGAGAAGAGAAAAAAGCTGCAAAA  
GAAGAAAAACGCAAGGAACGTGTCTGTGCAGAACACCTGAAGAAATATAATGATGCTCTCC  
AGATAAATGATACCATCCGAATGGTAGATGCATACAATCACCTGAATAACTTTTATAAGGAT  
GAGAAAAGTAAGAAGACAGTAAGGAGTGGTGATGATGATGATGATGCACCAGCAGTATCAA  
AACAGGATGAAACAGATTTATTTCTAATAAGTTTATTTACGCAAAAAAGAAACAGCTGAAG  
GAGTTGGCTAGAATGCCAGAATATGAAAATGAGAAGCTAACACAGTTGCGAAACACTTTAA  
TGGAGGAGTTCACGAAGACTGAGGCACCTAGAGGAATTATTTTCACAAAGACCCGGCTAA  
GTGCCTTTGCTCTATTCCAGTGGATTAAGGATAACCCAAAATTTGAAGAAGTGGGAATTAAG  
GCCATTATCTTATTGGTGCTGGACATAACAGTGAAATGAAACCCATGACTCAGAATGAGC  
AACGGGAAGTTATTGATAAATTCCGAGGTGGAAATTTGAATTTACTTGTTGCTACTACTGTA  
GCTGAGGAAGGCCTAGACATCAAAGAGTGTAACATTGTTATTTCGGTACGGCCTCGTCACCA  
ATGAAATTGCTATGGTGCAGGCTCGTGGTCGAGCTCGAGCTGATGAGAGCACCTATGCAC

TTGTCGCTTCGAGTGGCTCAGGAGCTGTTGAACGTGAAGATGTTAATATTTTCCGTGAGAA  
AATGATGTATAAAGCCATTTCAGAATGTCCAAAAGATGCCACAGGAAGAGTATTTAAAGAAGA  
TTCAGAATTTCCAGTGTCAAAGTATAGTGGAAAAAGAAATGAAGGCAAAGAGACATCAGCA  
CAAGACATACAAGAAAAATCCTTCACTAATAACATTCCTATGCAAAAATTGCCACAAGCTGG  
TATGTTCTGGGGAAGACATACGAGTTATTGAAAACATGCATCATGTCAGTGTGAAAAGAGA  
TTTCCAAAGTCTTTACCATACAAGAGAAAATAAGACACTGCAAGATAAGAATGCTGATTACC  
AGACAAATGGAGAAGTTATATGTAAAGATTGTGGACAAGCTTGGGGAAATATGATGGTTCA  
CCGAGGTCTTGACCTGCCTTGTCTAAAGATTATAAATTTTGTGATTGTGTTTGAAGACAAGA  
AGACAAGAAAAGAAATTTTAAAGAAATGGAGCGAGCTGCCCATCAAGTTCCCTGGTTTTGA  
TTATGCAGCTCATTGTCCTTCAAGTGATGAAGATTAA

>malurus\_cyaneus\_samueli-mda5

ATGGCAGCGGGCACCCGGGACGAGCGGTTCTCTACATGATCTCCTGCTTCAGGCCGCG  
GCTGAAGCAGTTCATCCGGGTGCAGCCCGTGCTGGACCGGCTCCCCTCGCTGAGCGCGG  
AGGACCGGGAGCGGGTGCGGGCGGCCGCCCTGCAGCGGGGCGAGCTGGCGGGGGCGG  
AGGAGCTGCTGCGGGCCGTGGAGCGGGGGCCCCGCGGCTGCGGCTGGATCCGCGAGTT  
CCTGCAGGCGCTGGAGCACAGCGGCTGCGACCTGGCCGCCTCCTACGCCAACCCAGCC  
TGAGCCTGCTGCCCTCGCCGGCAGAGGAGGCCGAGCACGACCTGTGCGTGCACCTGGTG  
CAGCTGCTGCACGTCACTCTGGTGGACAGAATGCGGACCGCGCAGGTGGCCCAGAAGTG  
CCTGGAGATGGGCATCTTCCAGGACGAGGACATGGATCGGATCCAGACTGTTACTGACAA  
TCGTGGGAACAGAGATGGTGCAAGGGAGCTACTGAGCAGAATAGTGCAGAAGAAGGATTG  
GTTCTCTACTTTTTTTGATTGCTCTCCGTGAAACCCAGCATGAAGACCTTGCAGATGATTTAA  
GGGGAAATACAGGAGGAACAGAGAATAACAAAGTGGGATGGAGAACAGTACAAATGAAG  
AAGCAGAAGTTACAAGCCAACCAGGATATGTTGTAGCAGAGAGCTTGAAAGAGGAAGAAAA  
TGTGGATGATAGTTCCAGCAGTGACAGCAGTGTACTGGAAACATCCACAGAAAAGAATTTT  
ATGGTGTGAGAGTCAGATGTCTCCATAGGAGATGGAAGTGTGAGTAACTTGAACGAAACCC  
TGGGACAGAGCTGCACAACCAGTGATTCAGATGAAGCAGAGAGGAGAGCTTCACCCGAGC  
CAGATCTGACCCTGAGAGATTACCAGATGGAAGTTGCAAAGCCAGCACTGAATGGGGAGA  
ATATTATAATTTGTCTCCCTACAGGCAGTGGTAAAACCAGAGTGGCTGTTTACATTACCAA  
GATCACTTGGATAAGAAGAAAAGAGCATCAGAGCCTGGAAAAGTCATAGTACTTGTTAATA  
AGGTGCCATTGGTAGAACAGCATTTACAAAGAGAGTTTAATCCATTCTGAAGCGTTGGTA  
TCAGGTTACTGGTTTAAAGTGGTGATTCTCAGCTGAAAATCTCATTTCCTGAAGTTGTCAAAA  
GAAATGATGTTATCATCAGTACAGCACAGATCCTTGAGAATTCAGTGTAAATGCAGCCAAG  
GAAGATGAAGAAGGTGTCCACTTATCAGATTTTTCCCTAATCATTATCGATGAGTGTGATCA  
CACACAAAAGGAAGGTGTCTACAACAATATAATGCGACGTTACTTAAAAGAAAAGAGGAAG  
AACAGGAAGCTGGCAAAAAGAAAACAAACCACTGATCCACAGCCTCAGATTCTGGGACTTA  
CAGCCTCACCTGGTGTAGGAGGTGCAACATCCTATTCAAAGCTGAAGAGCATATTCTCAA  
AATCTGTGCCAATCTTGATGCATGTAGAATTATGACTGTTGAAGAGCATGCCTCTCAGCTAA  
AGAATCAGGTGAAGGAGCCATCTAAGAAGACTGTGATTGCAGATGACAAAAAAGGGATCC  
ATTTAGAGAGAGAATTATTGAGATCATGACAGAAATACAAAACCTATTGCCAGCTGCATCCAA  
AATCTGAGTTTGGAACTCAGACATATGAACAGTGGGTGATCAGAGAAGAGAGAAGAGCTG  
CAAAAGAAGAAAAACGCAAGGAGCGTGTGTTGTGCAGAACATTTGAAGAAATACAATGATGC  
TCTCCAGATAAATGACACTATACGAATGGTGGATGCCTACAATCACCTAAATAACTTCTATA  
AAGAGGAGAAAAGTAAGAAGACAGTAAGGAGTGATGATGATGATGATGATGATGAACCTCC  
AGTATCAAAACAGGATGAAACAGATGAATTTCTAATAGGTTTATTTTCATGCAAAAAAGAAAC

AGTTGAAAGAGTTGACTGGAAAGCCAGAAAATGAAAATGAGAAGCTAATAAAGTTGCGAAA  
TACTTTAATGGAGGAGTTCACGAAGACTGAGGAGGCTCGAGGAATTATTTTCACAAAGACT  
CGTCTAAGTGCCTTTGCTCTATGCCAGTGGGTTAAGGACAACCCTAAATTTGAAGAAGTGG  
GAATTAAGGCCCATTAACCTTATTGGCTGTGGACATAACAGTGAAATGAAGCCCATGACTCA  
GAATGAGCAAAGGGAAGTTATTGATAAATTTGACGAGGAAATATAAATTTACTTATTGCTA  
CTACTGTAGCTGAGGAAGGCCTGGACATCAAAGAGTGTAACATCGTTATTCGTTATGGACT  
CGTCACCAATGAAATTGCTATGGTGCAGGCTCGTGGTCGAGCTCGAGCTGATGAAAGCAC  
ATATGCTCTTGTGGCTTCGAGTGGCTCAGGGGCTGTTGAACGTGAAGATGTTAATAATTTT  
CGTGAGAAAATGATGTATAAGGCCATTGAGCGTGTCCAGAAGATGCCACAGGAAGAGTATT  
TAAATAAGATTCAGAGTTTCCAGTTGCAAAGTATAGTGAAAAACAAATGAAGGCCAAAGAGA  
GATCAGCATAAGACATAACAAGGAAAATCCTTCACTAATAAAATTTCTGTGCAAAAATTGCTA  
CAAGCCAATATGTTCTGGAGAAGATATACAGGTTATTGAAGAAATGCATCATGTCAGTGTGA  
AAAAAGATTTCCAAGATCTTTACCATACAAGAGAAAAATAAGACACTGCAAGATAAGCATGCT  
GATTACCAGACAAATGGGGAAATTATTTGTAAAGATTGTGGACAAGCTTGGGGAAATATGA  
TGGTTCACCGAGGTCTTGACCTGCCTTGTCTAAAGATTAGAAATTTTGTGGTTGTGTTTGCA  
GACAAGAAAACAACAAAGAAAATTTTAAGAAATGGGGAGAACTGCCCATCAGGTTTCCTA  
GTTTTGATTATGCAGCTCATTGGCCTTCAAGTGATGAAGATTAA

>manacus\_vitellinus-md5

ATGGAAGAGGGGGACCGGGACGAGAGGTTCTCTACATGATCTCCTGCTTCAGGCCGCG  
GCTGAAGCAGTTCATCCAGGTGCAGCCCGTGTGGACCAGCTCCCCTCGCTGAGCGCGG  
AGGAGAGGGAGAAAGGTGCGGGCGGCCCTCCTGCAGGGGGGCGCTGTGGCGGGGGCCG  
AGGAGCTGCTGCGGGCCGTGGAGGGGGGgcCCCGCGGCTGCGGCTGGTTCCACGAGTTT  
CTGCAGGCACTGGAGCACGGCGGCTGTAGCCTGGCCGCCTGCTACGCCAACCCACAGCT  
CAGCCAGCTGCCCTCGCCGGCCGAAGAGGCCGACCACGACCTCTGCGTGCACCTGGTGC  
AGCTGCTCTACAGCACGCTGGTGGACAGGATGCGGGCCGTGCAGGTGGCCGAGAAGTGC  
CTGGAATGGGCATCTTCAAGGAGGAGGACCTGGAGCGGATCCAGACTGTTACTGACAAAT  
CGTGGGAACAGAGAGGGTGCAAGGGAGCTTCTGAGCAGAATAATGCAGAAGAAAGATTGG  
TTCTCTCCTTTTTTGATTGCTCTCCGTGAAACCCAACATGGAGACCTGGCAGATGATTTAAG  
TGGAATACAGGAGGAACAGAGAATAGACAAAATGAGATGAAGAACAGTACAAATGAAGAA  
ACAGAAATTACAAGCCAACCAGGATATGCCACAGTGGAGGATTTGAAACAGCAAGAAAATG  
TGAATGATAGTTTCATCAGTGAGAACAGTGTATTGGAACATCCATGGGAGAGAATTCTGTA  
GATTCAGAGTCAGATGTCTCCGTAGGAGATGGAAGTGTCCGTAACCTTCAGTGAAAACCTGG  
GCCAGAGCTGCACAACCAGCAATTCAGATGAAGAGAAGAGGAGAGCTTCACCTGAGCCAG  
ATCTGACCCTGAGAGATTACCAGATGGAAGTTGCAAAGCCAGCACTGAATGGGGAGAATAT  
TATAATATGTCTCCCTACAGGCACTGGTAAAACCAGAGTGGCTGTTTACATTACCAAAGATC  
ACTTGATAAGAAGAAAAGAGCATCAGAGCCTGGAAAAGTCATAGTACTTGTTAATAAGGT  
ACCACTGGTACAACAGCATTTAGAATCAGAGTTTCATCCATTCTGAAGCGTTGGTATCAG  
GTTATTGGTTTAAGTGGTGATTGTCAACTGAAAATCTCATTTCTGAAGTTGTCAGAAGAAA  
TGATGTCATCATCAGTACAGCACAAATCCTTGAGAATTCAGTGATAAATGCAGACAAAGAAG  
ATGAAGAAGGTGTCCACTTATCAGATTTTTCCCTTATCATTATTGATGAGTGTCATCACAG  
CAGAAGGAAGGTGTCTACAACAATATAATGCGACGTTACTTAAAAGAAAAGATGAAGAACA  
GGAAGCTGGCAAAAAGAAAACAAACCACTGATCCCACAGCCTCAGATTCTGGGACTTACAG  
CCTCACCTGGTGTAGGAGGCGCAAGATCCTACTCAAAGCTGAAGACCATATTCTGAAAAT  
CTGTGCCAATCTTGATGCATGTAGAATTATGACTGTTGAAGAGCATGAGGACCAGTTAAAG

AATCAGGTGAAGGAGCCGTCCAAGAAGACTGTGGTTGCAAATGACAAAAAAGGGATCCA  
TTTAGAGAGAAAATTACTGAGATCATGACAGAAATACAAAACCTATTGCCAGCTCTATCCAAA  
ATCCGAGTTTGGAACTCAGACATATGAACAGTGGGTGATCAGAGAAGAGAGAAGAGCTGC  
AAAAGAAGAAAAACGCAAGGAACGTGTTTGTGCAGAACACTTGAAGAAATACAATGATGCT  
CTCCTGATAAATAACAGTATCCGAATGGTGGATGCATACAATCACCTAAATAACTTTTATAA  
GGAGGAGAAAAGTAAGAAGACAGTAAGGAGTGATAGTGATGATGATGACGATGAACCAGC  
TGTATCAAAACAGGATGAAACAGATGAATTTCTAATAGGTTTATTTTCATGCAAAAAAGAAGT  
GGCTGAAAAAGTTGGCTGGAAAGCCAGAACATGAAAATGAGACTCTAATAAAGTTGCGAAA  
TACTTTAATGGAGGAGTTCACGAAGACTGAGGAACCTAGAGGAATTATTTTCACAGAGACT  
CGTCTAAGTGCCTTTGCTCTATTCCAGTGGATTCAAGACAACCCAAAATTTAAAGAAGTGG  
GAATTAAGGCCCATATCTTATCGGCTCTGGACATAACAGTGAAATGAAACCCATGACTCA  
GAATGAGCAAAGGGAAGTTATTGATAAATTCCGATGTGGAAATTTAAATTTACTTATTGCTA  
CTACTGTAGCTGAGGAAGGCTTGGACATCAAAGAGTGTAACATCGTTATTTCGCTATGGCCT  
TGTCACCAATGAAATTGCTATGGTGCAGGCTCGCGGTGAGCTCGAGCTGATGAGAGCAC  
CTATGCTCTTGTGGCTCCGAGTGGCTCAGGAGCTGTTGAACGTGAAGATGTTAATATTTTC  
CGTGAGAAAATGATGTATAAGGCCATTACGCGTGTCCAGAAGATGCCACAGGAAGAGTATT  
TAAACAAGATTGAGAATTTCCAGTTGCAAAGTATAGTGGAAAAACAAATGAAGGCAAAGAAA  
GATCAGCGCAAGACATACAAGAAAAATCCTTCACTAATAACATTCTTATGCAAAAATTGCCA  
CAAAACGATATGTTCTGGAGAAGACATACAAGTTATTGAGAACATGCATCATGTCAGTGTGA  
AAAAAGATTTCCAAAGCCTTTATCATACAAGAGAAAAATAAGACACTGCAAGATAAGCATGCC  
GATTACCAGACAAATGGGGAAATTATATGTAAAGATTGTGGACAAGCTTGGGGAAATATGA  
TGGTTCACCGAAGCCTTGACCTACCTTGTCTGAAGATTAGAAATTTTGTGGTTGTGTTTGCA  
GACAAGAAAACAACAAAGCAAATTTTAAAGAAATGGGGAGAACTGCCCATCAGGTTTCCTA  
GTTTTGATTATGCAGCTCATTGTCCTTCAAGTGATGAAGATTAA

>megadyptes\_antipodes-mda5

ATGGCAGAGAGTCCCGAGACGAGCGCTTCCTCTACCTGATCTCCTGCTTCAGGCCGCGG  
CTGAAGCAGTTCATCCGGGTGCAGCCGGTGCTGGACCTGCTTCCCTCGCTGAGCGCTGG  
GGAGAGGGGAGAAGGTGCGGGGCGGCCGCGTTGCAGCGGGGCGAGGTGGAGGGGGCGGA  
GGAGCTGCTGCGGGTTCGTCGAGCGGGGGCCCCGCGGTGCGGCTGGTTCCACGAGTTC  
CTGCAGGCGCTGGAGCGAGGTGGCTGCAGCCTGGCCGCCTGCTACGTGAACCCAGCCT  
CAGCCAGCTGCCCTCGGCGGCCGAGGAGGAGGACCATGACCTCTGCGTGCACCTTGGTGC  
AGCTGCTCCACAGCACACTGGTGGATAGAATGCAGACCATGCAGGTGGCTGAGAAGTGCC  
TGCAGATGGGCATCTTCCAGGACGAGGACCTGGATCGGATCCACACTGTTACTGACAATC  
GTGGGAACAGAGATGGTGCAAGGGAGCTACTGAGCAGGATTGTGCAGAAGAAAGATTGGT  
TCTCTCCTTTTTTGATTGCTCTGCGTGAAACCCAACATGGAGGCCTTGCAAGATGATTTAAGC  
GGAAATACAGGAGGAACAGAGAATAGACAAAATGAGATGAAGAACAGTACAAATGAAGAAA  
CGAAAGTTACAAGCCAACCAGGATATGCCATAGTGGAGGATCTGAAACAGCAAGAAAATGT  
GAATGATAGTTTTAGCAGTGAGAACAGTGTATCGGAAACATCTATTGGAAAGAATTCTATAG  
TTTCAGAGTCCGATGTCTCCACAGGAGATGGAAGTGTGAGTAACTCGAATGAAAACCTGGG  
ACAGAGCTGCACAACCAGTGATTGAGATGAAGATGAAGTGGAGAGTAGAGCTTCACCTGA  
GCCAGATCTGATCCTGAGAGATTACCAGATGGAAGTTGCAAAGCCAGCACTGAATGGGGA  
GAATATTATAATATGTCTCCCTACAGGCAGTGGTAAACCAGAGTGGCTGTTTACATTACCA  
AAGATCACTTGGATAAGAAGAAAAGAGCATCAGAGCCTGGAAGTTATAGTACTTGTTAAT  
AAGGTACCATTGGTAGAACAGCATTACGAAAGGAGTTTAAATCCATTCTGAAGCGTTGGT

ATCAGGTTATTGGTTTAAGTGGTGATTCTCAGCTGAAAATCTCATTTCTGAAGTTGTCAGT  
AGAAATGATGTCATCATCAGTACAGCACAGATCCTTGAGAATTCATTATTAATGCAGCCGA  
AGAAGATGAAGAAGGTGTCCACTTATCAGATTTTTCTCATCATTATCGATGAGTGTATC  
ACACTCAAAAGGAAGGTGTCTACAACAATATAATGCGACGTTACTTAAAAGAAAAGATGAAG  
AACAGGAAGCTGGCAAAAGAAAACAAACCACTGATCCACAGCCTCAGATTCTGGGACTTA  
CAGCCTCACCTGGTGTAGGAGGTGCAACATCCTACTCAAAAGCTGAAGAACATATTCTGAA  
AATCTGTGCCAATCTTGATGCATTTAGAATCATGACTGTTGAAGAGCATGCCTCCCAGTTGA  
AGAATCAGGTGAAGGAACCGTATAAGAAGACGGTGATTGCGGATGACAAAAGAAGAGATC  
CATTTAGAGAGAGAATTACTGAGATCATGACAGACATTCAAACTATTGCCAGCTCCATCCA  
AAATCTGAGTTTGGAACCTCAGACATATGAACAGTGGGTGATTAGAGAAGAGAGAAAAGCTG  
CAAAAGAAGAAAACGCAAGGAACGTGTCTGTGCAGAACACTTGAAGAAATACAATGATGC  
TCTCCAGATAAATGACACCATCCGAATGGTGGATGCGTACAATCACCTAAATAACTTTTATA  
AGGAGGAGAAAAGTAAGAAAACAGTAAGGAGTGATGATGATGATGATGAACCAGCAG  
TATCAAAACAGGATGAAACAGATGAATTTCTAATAGGTTTATTTTCATGCAAAAAGAAGCAG  
CTGAAAGAATTGGCTAGAAAGCCAGAATACGAAAATGAGAAGCTAATACAGTTGCGAAAGA  
CTCTGATGGAGGAGTTCACGAAGACTGAGGAACCTAGAGGAATTATTTTCACAAAGACTCG  
GCTAAGTGCCCTTGCTCTATTGCAGTGGATTAAGGATAACCCAAAATTTGAAGAAGTGGGA  
ATTAAGGCCAGTTATCTTATTGGTGCTGGACATAACAGTGAAATTAACCCCATGACTCAGAA  
TGAGCAAAGGGAAGTTATTGACAAATTCCGAGGTGGAATGTAAATTTACTTATTGCTACTA  
CTGTAGCTGAGGAAGGCCTAGACATCAAAGAGTGTAACATCGTTATTCGCTATGGCCTCGT  
CACCAATGAAATTGCTATGGTGCAGGCTCGTGGTCGAGCTCGAGCTGATGAGAGCACCTA  
TGCACTTGTGGCTTCGAGTGGCTCAGGAGCTGTTGAACGTGAAGATGTTAATATTTTCCGT  
GAGAAAATGATGTATAAGGCCATTACAGCGTGTCCAGAAGATGCCGCAGGAAGAGTATTTAA  
ATAAGATACAGAATTTCCAGTTGCAAAGTATAGTGGA AAAACAAATGAAGGCAAAGAGAGA  
TCGGCACAAGACATACAAGAAAAATCCTTCACTAATAACATTCCTATGCAAAAATTGCCACA  
AGCTGGTATGTTCTGGAGAAGACATACAAGTTATTGAAAACATGCATCATGTGAGTGTGAAA  
AAAGATTTCCAAAGTCTTTACCATACAAGAGAAAATAAGACACTGCAAGATAAACATGCCGA  
TTACCAGACAAATGGGGAAATTATATGTAAAGATTGTGGACAAGCTTGGGGAAATATGATG  
GTTACCCGAGGCCTTGACCTGCCTTGTCTAAAGATTAGAAATTTTGTGGTTGTGTTTGAAGA  
CAAGAAAACAACAAAGCATATTTTTAAGAAATGGGGAGAACTGCCCCGTCAGGTTCCCTAGT  
TTTGATTATGCAGCTCATTGTCCTTCAAGTGATGAAGATTAA

>melanerpes\_aurifrons-mda5

ATGGTAGAGTCGTCCCGAGACGAGCGCTTCCTCTACATGATCTCCTGCTTTAGGCCGCGG  
CTGAAGCAGTGCATCCGGGTGCAGCCGGTGCTGGACCAGCTTTTCTCGCTAAGCGCCGAA  
GAAAAGGAGAAGGTGCGGGTGGCCGCCTTGACGCGGGGCGATGTGGAGGGGGCAGAGG  
AACTGCTGCGGGCCGTGGAGCGGGGTCCCCGCGGCTGTGGCTGGTTCCTCGAGTTCCTG  
CAGGCGCTTGAGAACGGCGGGTGCAGCCTGGCCGCCTGCTACATAAACCCAGCCTCAG  
CCAGCTGCCCTCGCCGGCCGAGGAGGCCGACCATGACCTCTGCGTGCAGTTGGTGCAAC  
TACTCCACAGCACGCTGGTGGATAAAAATACGGACCGTAGAATTGGCAGAGAAGTGCATGG  
AGATGGGCATCTTCCAGGAAGAGGATCTGGATCGGATCTATGCTGTTACTGACAATCGTGG  
GAACAGAGATGGTGAAGGGAGCTATTGAGCAGAATAGTGCAGAAGAAGGACTGGTTCTC  
TCATTTTTTGTCTGCTCTGCGTGAAACCCAACATGGAAGCCTTGCAAGATGAATTAAGTGGA  
ATACAAAAGGAACAGAGAACAGTCAAAATGGGATGAGGAACAGTACAAATGAAGAATTGGA  
GGATTTGAAACAGCAAGAAAATGTGAATGATAGTTTCAACAGTGAGAACAAATATATTGAAA

CATCTGGTGGAAAGAACTCTGTCATTTTCAGACTCAGGTGTCTCCACAGGAGATGGAAGTGT  
CAGTAGCTTGAATGAAAACCTGGGACAGTCCTACAATACCAGTGATTCAGATGAAGATGAA  
GGGGAGAACAGAGCTTCACCGGAGCCAGATTTGATCCTGAGAGATTACCAGATGGAAGTT  
GCAAAGCCAGCCCTGAATGGAGAGAATATTATAATATGTCTTCCTACAGGCAGTGGTAAAA  
CCAGAGTGGCTGTTTACATTACCAAAGATCACTTGGATAAGAAGAAAAGAGCGTTAGAGCC  
TGGAAAAGTTATAGTACTTGTTAACAAGGTCTCGTTGGTAGAACAGCATTACAAACGGAGT  
TTAATCCATTCTTGAAGCGCTGGTATCACGTTACTGGTTTAAGTGGTGATACTCAGCTGAAA  
ATCTCATTTCTGAAGTTGTCAGAAGACATGATGTCATCATCAGTACAGCACAGATCCTAGA  
GAATTCAGTGATAAATGCAGCTAAAGAAGATGAAGAAGGTGTCCACTTATCAGATTTTTTCAC  
TTATCATTATTGATGAATGTCATCACACTCAAAAGGAAGGTGTCTACAACAACATAATGCGA  
CGTTACTTAAACAAAAGATTAAGAACAAGAAGCTAGCAAAAGAAAACAAACCACTGATCCC  
ACAGCCTCAGATTCTGGGACTTACAGCCTCACCAGGTGTAGGAGGTGCAACATCTTCCTTA  
AAAGCTGAAGAACATATTCTGAGAATCTGTGCCAATCTTGATGCCCATAGATTTATGACTGT  
TGAAGAGCATGCCTCCAGTTGAAGAATCAGGTGAAAGAGCCATATAAAAAAACTGTGATT  
GCAGATGGCAAAGAAAGGATCCATTTAGAGAGAGAATTACTGAGATCATGACAGACATTC  
AAAATATTGCCAGCTCCATCCAAAATGTGAGTTTGGAACCTCAGCCATATGAACAGTGGGT  
GATTAGAGAAGAGAGAAGAGCTGCAAAAGAAAAAAACCGCAAGGAACGTGTCTGTGCAGA  
ACACCTGAAGAAATACAATGATGCTCTCCAGATCAATGATACCATCCGAATGATAGATGCAT  
ACAATCACCTACGTGACTTTTATAAGGAGGAGAAAAGTAAAAAGATGGTAAGGAGTGATGA  
TGATGATGATGATGACAAACCAGCAGTAACAAAACAGGATGAAACAGATGAATTTCTAATAG  
GTTTATTTTCATGCGAAAAGGAAACAGCTGAAAGAGTTGGCTAGAAATCCAGAATATGAAAAT  
GAGAAGCTAATAAAGCTGCGAAACACTTTAATGGAGGAGTTCACAAAGACTGAAGAACCTA  
GAGGAATTATTTTCACAAAGACTCGGCTAAGTGCCCTTTGCTCTGTTCCAGTGGATTAAGGAT  
AACCCAAAATTTGAAGAAGTGGAATTAAGGCCATTACCTCATCGGTGCTGGACATAACA  
GTGAAACTAAACATATGACTCAGAATGCACAAAGGGATGTTATTGATAAATTCGAAGTGGA  
AATGTAAATTTACTTATCGCTACCACTGTAGCTGAGGAAGGCCTAGATATCAAAGAGTGTA  
CATTGTTATTCGCTATGGCCTTGTACCAATGAAATTGCTATGATACAGGCTCGTGGTCTGA  
GCTCGAGCTGCTGAGAGCACCTATGCACTTGTGGCTTCAGTTGGCTCAGGAGCCACTGAA  
CGTGAGGATGTTAATGTTTTCCGTGAGAAAATGATGTATAAGGCCATTCAACGTCTCCAGA  
AGATGCCACAGGAAGAGTATTTAAATAAGATTGAGGAATTCCAGTTGCAAAGTGTAAGTGA  
AAGACGCATGAAGGCAAAGAGAGATCAACACAAGACACACAAGAAAAATTCTTCATTAATA  
AAATTCCTATGCAAAAATTGCCACAACTGATATGCTCTGGAGAAGATATTCAAGTTATTGA  
AAACATGCATCATGTGAGTGTAAGAAAGATTTCCAAAGTCTTTATCATACAAGAGAAAATA  
AGACACTGCAAGATAACCATGCTGGTTACCAGACAAATGGGGAGATTATATGTAAAGACTG  
TGGACAAGCTTGGGGAAATATCATGGTTCACCGAGGTCTTGACCTACCTTGTCTAAAGATT  
AGCAATTTTGTGGTTGTGTTTGAAGACAAAAAGCCAACAGAAGATATTTTTAAAAAATGGAA  
AGATCTGCCTGTAAAGTTCCTAGGTTTGATTATGCAGCTCATTGTTCTTCAAGTGATGAAG  
ATTGA

>melopsittacus\_undulatus-mda5

ATGGCAGGGGAGTTGCGAGATGAGCGTTTCCTCTACATGATCTCGTGCTTCAGGCCGCGG  
CTGAAGCAGTTCATCCGGGTGCAGCCGGTGCTGGACCGGCTCCCTTCGCTCAGTGTGGA  
GGACAGGGAGAGGGTGCGGGCGGCTGCGCTGCACCGGGGCGAGGTGGAAGGGGCGGA  
GGAGCTGCTGCGGGCCGTGGAGCGGGGACCCCGCGGCTGTGGCTGGTTCCACGAGTTC  
TTGCAGGCGCTTGAGCACAGCGGCTGCGGCATGGCCGCCTGCTACGTGAACCCAGCCT

CAGCCAGCTGCCCTCTCCGGCCGAGGAGGCCGACCACGACCTCTGCGTGCAATTGGTGC  
AGCTGCTTCACAGCACTCTCGTGGATAGTATGCGGACCGTGACAGGTGGCCGAGAAGTGCC  
TGCAGATGGGCATCTTCCAGGATGAGGACCTGGACGGGATCCATACTGTTACTGACAGTC  
GTGGGAACAGAGAAGGTGCAAGGGAGCTATTGAGCAGATTAGTGCAGAAGAAAGATTGGT  
TCTCTCGTTTTTTGATTGCTCTGCGTGAAACCCAGCATGGAGGCCTTGCAGATGATTTAAGT  
GGTAATATAGGAGGAACAAAGGATAAACAAAATGGAATGAAGAAAAGTACAAATGAAGAAA  
CAGAAGTTACAAGCCAACCATGTTATGCCATAGTGGAGGACTTGAAGCAGCAGGAAAATAT  
GAATGATAGTTTTAGCAGTGAGAACAATTTATTGGAAACATCTATTGGAAAGAATTCTGTAC  
TTTCAGAGTCAGATGTCTCTACAGGAGTTGGAAGTGTGCGTAACTTGAATGAAAACCTGAG  
ACAGAGCTGCACAAGCAGTGATTCAGACGAAGAGGAGAGCAGAGCTTCACCTGAGCCAGA  
TTTGGTCCTGAGAGATTACCAGATGGAAGTTGCAAAGCCAGCACTGAATGGGGAGAATATT  
ATAATATGTCTCCCTACAGGCAGTGGTAAAACCAGAGTGGCTGTTTACATTACCAAAGATCA  
TTTGGATAAAAAGAAAAGAGCATCAGAGCCTGGAAAAGTTATAGTCCTTGTTAATAAGGTAC  
CATTGGTAGAACAGCATTTACGAAAGGAGTTTAGTCCATTCTGAAGCGCTGGTATCACGT  
TATTGGTTTTAAGTGGTGATTCTCAGCTGAAAATCTCATTTCTGAAGTTGTCAGAAGAAATG  
ATGTCATCATCTGTACAGCACAGATCCTTGAGAATTCAGTCTAAATGCAGACAAAGAAGAT  
GAAGAAGGTGTCCACTTATCAGATTTTTCACTCATCATTATTGATGAGTGTATCACACTCA  
AAAGGAAGGTGTCTACAACAACATAATGCGACGTTACTTAAAAGAAAAAAGAAGAACAGG  
AAATTGGCAAAAGGAAACAAACCACTGATACCACAGCCTCAGATTCTGGGACTTACAGCCT  
CACCTGGTGTAGGAGGTGCAACATCCTATTCCAAAGCTGAAGAACATATTCTGAAAATCTG  
TGCCAATCTTGATGCATGCAGAATCATGACTGTTGAGGAACATGCCTCCCAACTGGAGAAT  
CAGGTGAAGGAACCTTTTTAAGAAGACTGTGATTGCAGATGACAAAAAAGGGATCCATTTA  
GAGAGAGGATAACTGAGATCATGACAGAGATTCAAACTATTGCCAGCTTCATCCAAAATC  
TGAGTTTGGAACTCAGCCATATGAACAGTGGGTGATCAGAGAAGAGAAAAAAGCTGCAAAA  
GAAGAAAAACGCAAGGAACGTGTCTGCGCAGAACACCTGAAGAAATATAATGATGCTCTCC  
AGATAAATGATACCATCCGAATGGTAGATGCATACAATCACCTGAATAACTTTTATAAGGAT  
GAGAAAAGTAAGAAGACAGTAAGGAGTGGTGATGATGATGATGATGCACCAGCAGTATCAA  
AACAGGATGAAACAGATTTATTTCTAATAAATTTATTTTCATGCAAAAAAGAACAGCTGAAG  
GAGTTGGCTAGAATGCCAGAATATGAAAATGAGAAGCTAACACAGTTGCGAAACACTTTAA  
TGGAGGAGTTCACGAAGACTGAGGCACCTAGAGGAATTATTTTCACAAAGACCCGGCTAA  
GTGCCTTTGCTCTATTCCAGTGGATTAAGGATAACCCAAAATTTGAAGAAGTGGGAATTAAG  
GCCATTATCTTATTGGTGCTGGACATAACAGTGAAATGAAACCCATGACTCAGAATGAGC  
AACGGGAAGTTATTGATAAATTCCGAGGTGGAAATTTGAATTTACTTGTTGCTACTACTGTA  
GCTGAGGAAGGACTAGACATCAAAGAGTGTAACATTGTTATTCCGGTATGGCCTTGTACCA  
ATGAAATTGCTATGGTGCAGGCTCGTGGTGCAGCTCGAGCTGATGACAGCACCTATGCAC  
TTGTCGCTTCAAGTGGCTCAGGAGCTGTTGAACGTGAAGATGTTAATATTTTCCGTGAGAA  
AATGATGTATAAAGCCATTGAGAATGTCCAAAAGATGCCACAGGAAGAGTATTTAAAGAAGA  
TTCAGAATTTCCAATTGCAAAGTATAGTGGAAAAAGAAATGAAGGCAAAGAGACATCAGCA  
CAAGACACTCAAGAAAAATCCTTCGCTAATAACATTCTATGCAAAAATTGCCACAAGCTGG  
TATGTTCTGGGGAAGACATACGAGTTATTGAAAACATGCATCATGTCAGTGTGAAAAGAGA  
TTTCCAAAGTCTTTACCATACAAGAGAAAATAAGACACTGCAAGATAAGAATGCTGATTACC  
AGGCAAATGGAGAAGTTATATGTAAAGATTGTGGACAAGCTTGGGGAAATATGATGGTTCA  
CCGAGGTCTTGACCTGCCTTGTCTAAAGATTATAAATTTTTGTGATTGTGTTTGAAGACAAGA  
AGACAAGAAAGGAAATTTTTAAGAAATGGAGCGAGCTGCCCATCGAGTTCCTGGTTTTGA



TTATGCAGATCATTGTCCTTCAAGTGATGAAGACTAA

>melospiza\_melodia-mda5

ATGGCAGAGGGCAGCCGGGACGAGCTGTTCTCTACATGATCGACTGCTTCAGGCCGCG  
GCTGAAGCAGTTCATCCAGGTGCAGCCCGTGCTGGACCGGCTGCCCTCGCTGAGCGCCG  
AGGACCGGGACAGGGTCCGTGCGGCCGCCGAGCAGCGGGGCGCGGCGGCGGGCGCCG  
AGGAGCTGCTGCAGGCCGTGGAGCGGGGGCCCCGCGGCCGCGGCCCGATCCGCGAGTT  
CCTGCAGGCGCTGGAGTACGGCGGCTGCAGCCTGGCCGCCTGCTACGCCAACCCAGCC  
TGAGCCAGCTGCCCTCGCCGGCAGAGGAGGCCGAGCACGACCTCTGCGTGACCTGGTG  
CAGCTGCTGCACGGCACGCTGGTGGACAGGATGCGCGCCGGGCCGGTGGCCAGAAAT  
GCCTGCAGATGGAGATCTTCCAGGACGAGGACGTGGAGCGGATCCAGACTGTTATTGACA  
ATCGTGGGAACAGAGATGGTGCAAGGGAGCTACTGAGCAGAATAGTCCAGAAGAAAGCCT  
GGTTCTCTCCTTTTTTGATTGCTCTCCGTGAAACCCAACATGAAGACCTTGCAGATGATTTA  
AGTGGAATACAGGAGAGAATAAACAAAGTGGGATGGAGCAGACTACGAATGAAGAAACA  
GAAGTTACAAGCCAACCAGGATACGTCACAGAGGAGAATTTGAAACAGGAAGAAAATGTG  
GATGACAGTTCCAGCAGTGAGAACAGTCTGTTGGAAACATCCATAGAAAAGAATTCTGTGA  
TGTCAGAGTCAGATGTCTCCATAGGAGATGGAAGTGTCAGTAGCTTGAATGGAAACCTGGA  
ACAGAGCTGCACTACCAGTGATTCAGATGAAGTGGAGAGGAGAGCCTCACCTGAGCCAGA  
TCTGACCCTGAGAGATTACCAGATGGAAGTTGCAAAGCCAGCATTGAATGGGGAGAATATT  
ATCATATGTCTCCCTACAGGCAGTGGTAAAACCAGAGTGGCTGTTTACATTACCAAAGATC  
ACTTGGATAAGAAGAGAAGAGCATCAGAGCCTGGAAAAGTCATAGTACTTGTTAATAAGGT  
TCCATTGGTAGAACAGCATTTAAAAAGAGAGTTTAGTCCATTCTGAAGCGTTGGTATCAG  
GTTATTGGTTTAAAGTGGTGATTCTCGGCTGAAAATCTCATTTCTGAAGTTGTCAGAAGAAA  
TGATGTCATCATCAGTACAGCACAGATCCTTGAGAATTCAGTGTTAAATGCATCCAAGGAAG  
ATGAGGAAAGTGTCCACTTATCAGATTTTTCCCTCATCATCATCGATGAGTGTATCATACT  
CAAAAGGAAGGTGTCTACAATAACATAATGAGACGTTACTTAAAAGAAAAGATGAAGAACA  
GGAAGCTGGCAAAAGAAAACAAACCACTGATCCCACAGCCTCAGATTCTGGGACTTACAG  
CCTCACCTGGTGTAGGAGGTGCAACATCCTACTCAAAGCTGAAGAGCATATTCTGAAAAT  
CTGTGCCAATCTTGATGCATGTAGGATTATGACTGTTGAAGAGCATGCCTCCCAGCTAAAG  
AATCAGGTGAAGGAACCATCTAAGAAGACTGTGATTGCAGATGATAAAAAAGGGATCCAT  
TTAAAGAGAGAATCACTGAGATCATGACAGAAATACAGAACTATTGCCAGCTGCATCCGAA  
GTCTGAGTTTGGAACTCAGACATATGAACAGTGGGTGATCAGAGAAGAGAGAAGAGCTGC  
GAAAGAAGAAAAACGGAGGGAACGTGTCTGTGCAGAGCACTTGAAGAAATACAATGATGC  
TCTCCAGATAAATGACACCATCCGAATGGTGGATGCCTACAATCACCTAAATAACTTCTATA  
AAGAGGAGAAAAGCAAGAAGACAGTAAGGAGTGATGATGATGATGATGAACCAGCAG  
TATCAAAACAGGATGAAACAGATGAATTTCTAATAGTTTTATTTTCATGCAAAAAAGAAACAG  
CTGAAAGAGTTGACTAGAAATCCAGAAAATGAAAATGAAAAGCTAACGAAGTTGAGAAATA  
CTTTAATGGAGGAGTTCACGAAGACTGAAGAACCTCGAGGAATCATTTTCACAAAGACTCG  
TCAAAGTGCCTCTGCTCTTTTCCAGTGGATTAAGGACAACCCAAAATTTGAAGAAGTGGGA  
ATTAAGGCCCATTTATCTTATTGGCTCTGGACATAAGAGTGAAACGAAGCCCATGACTCAGA  
ATGAGCAAAGGGAAATTATTGATAAATTTTCGATGTGGAAATGTAAATTTACTAATTGCTACTA  
CTGTAGCTGAGGAAGGCCTGGACATCAAAGAGTGTAACATCGTTATTCGCTACGGCCTCGT  
CACCAATGAAATTGCTATGGTGCAGGCTCGCGGTAGAGCTCGAGCTGATGAAAGCACCTA  
TGCTCTTGTGGTTTCAAGTGGCTCAGGGGCTGTTGAACGTGAAAATGTTAATTTTTTCGTG  
AGAAAATGATGTACAAGGCCATTCAGCGTGTTTCAAGATGCCACAGGAAGAGTATTTTAA

AAAGATTCAGATTTTCCAGTCGCAAAGTATAGTGAAAAACAAATGAAGGTGGTGAGAGAT  
CAGCGCAAGACATACAAGAAAAATCCTTCACTAATAAAATTCTTATGAAAAATTGCTCCAA  
GCCGATATGTTCTGGAGAAGACATACAAGTTATTGAAGACATGCATCATGTCAGTGTGAAA  
AAAGATTTCCAAAGTCTTTATCATAACAAGAGAAAATAAAACACTGCAAGATAAGCATGCTGA  
TTACCAGACAAATGGGGAAATTATATGCAAAGACTGTGGACAAGCTTGGGGAAATATGATG  
GTTTCATCGAGGCCTTGACCTGCCTTGTCTAAAGATCAGAAATTTTGTGGTTGTGTTTGCAGA  
CAAGAAAACAACAACAATATTTTTTAAGAAATGGGGAGACCTGCCCATCAGGTTTCCTAGTT  
TTGATTATGCAGCTCATTGTCCTTCAAGTGATGAAGATTAA

>merops\_nubicus-mda5

ATGGCAGGGGACCCCCGGGACGAGCGCTTCTCTACATGATCTCCTGCTTCAGGCCGCG  
GCTGAAGAAGTTCATCCGGGTGCAGCCGGTGCTAGACCGGCTCCCCTCGCTGAGCGCCG  
AGGAGCGGGAGAAGGTGCGGGCGGCCGCCCTGCAGCGCGGCGAGGTGGAGGGGGCGG  
AGGAGCTGCTGCGGGCCGTGGAGCGGGGCCCCCGCGGGTGCGGCTGGTTCCACGAGTT  
CCTGCAGGCGCTGGAGCACGGCGGCTGCGGCCTGGCCGCCTGCTACGTGAACCCAGC  
CTGAGCCAGCTGCCCTCGCCGGCCGAGGAAGACGACCACGACCTCTGCGTGCACCTTGGT  
GCAGCTGCTCCACAGCACGCTGGTGGACAGAATGCAGGCGGTGCAGTTGGCCGAGAAGT  
GCCTGGAGATGGGCCTCTTCCAGGACGAGGACCTGGATCGGATCCACACTGTTACTGAGA  
ATCGTGGAATAGAGATGGTGCAAGGGAGCTATTGAGCAGAATAGTGCAGAAGAAAAATT  
GGTTCTCTCATTTTTTGGAGAGCTCTGCGTGAAACCAAGCATGGAAGCCTTGACAGATGATTT  
AAGTGGAATACAGGAGGACTAGAGGATGGACAAAATGGGATGAATAACAGTACAAACAAA  
GCAACAGAAGTTACAAGCCAACCAGAATATGCCATAGAGGAGGATTTGAAACAGCCAGAAA  
ATGCGAATCGTACTTTTCAGCAGTGAGAACAGTGTATTGAAACACCTGTTGGAAAGAATTC  
CGTAGTTTCAGAGTCCCGTGTCTCCATAGAAGATGGAAGTATCAGTAACCTGAATGAGAAC  
CTGGGAGAGAGCTCCACAACCAGTGATTTCAGATGAAGATGAAGTGGAGAGCAGAGCTTCA  
CCTGAGCCAGATCTCATCCTGAGAGATTACCAGATGGAAGTTGCAAAGCCAGCACTGAATG  
GAGAGAATATTATAATATGCCTCCCTACAGGCAGTGGTAAACTAGGGTGGCTGTTTACAT  
TACCAAAGATCACTTGGATAAGAAAAAAGAGTATCAAAGCCTGGAAAAGTTATAGTACTTG  
TTAATAAGGTACCGTTGGTAGAACAGCATTTACGGAAGGAGTTTAAGCCATTCCCTGAAGCG  
TTGGTATCAGGTTATTGGCTTAAGTGGTGATTCTCAACTGAAAATCTCATTTCCCTGAAGTTG  
TCAGAAGAAATGATGTCATCATCAGTACAGCACAGATCCTTGAGAATTCAGTGTAAATGCA  
GCTGAAGAAGACGAAGAAGGTGTCCACTTATCAGATTTTTCACTCATCATCATTGATGAGTG  
TCACCACACTCAAAAGGAAGGTGTTTACAACAATGTAATGCGACGTTACTTAAGAGAAAAG  
ATGAAGAACAACAAGCTGGCAAAAGAGAACAAACCACTGATCCCACAGCCTCAGATTCTGG  
GACTCACAGCCTCACCTGGTGTAGGAGGTGCAACATCCAACCTCAAAAGCTGAAGAACACAT  
TCTGAAAATCTGTGCCAACCTTGATGCATGTAGAATCATGACTGTTGAAGAGCACGCCTCC  
CAACTGAAGAATCAGGTGAAAGAACCTTATAAGAAGACTGTGATTGCAGATGACGAAAGAA  
GGGATCCATTTAGAGAGAGAATTACTGAGATCATGACAGACATTCAAACTATGGCCAGCT  
CCATCCAAAAGCTGAGTTTGGAACTCAGCCTTATGAACAGTGGGTGATTAGAGAAGAGAGA  
AGAGCTGCAAAAGAAGTAAAACGCAAGGAACGCGTCTGTGCAGAACACCTGAAGAAATAC  
AATGATGCTCTCCAGATAAATGACACCATCCGAATGGTAGATGCGTACAATCACCTAAATAA  
CTTTTATAAGGAGGAGAGAAAAGTAGGAAGACAGTAAGGAGTGATGATGATGATGAACCAGCA  
GTTTCAAAACAGGATGAAACAGATGATTTTTTAATGGGTTTATTTTCATGCAAAAAAGAAGCA  
GCTAAAGAATTGGCTAGAAGGCCAGAATATGAAAATGAGAAGTTAAAGAGTTGCGAAAC  
ACTTTAATGGAGGAGTTCACGAAGACTGAGGAACCTAGAGGGATTATTTTCACAAAGACTC

GGCTAAGTGCCTTTGCTCTATTCCAGTGGATTAAGGATAACCCAAAATTTGAAGAAGTGGG  
AATTAAGGCCCATATCTTATTGGTGCTGGACATAACAGTGAACTAAACCCATGACTCAGA  
ATGAGCAAAGGGAAGTTATCGATAAATTCCGCAGTGGAAATGTAAATTTGCTTATTGCTACT  
AGTGTAGCTGAGGAAGGCCTAGACATCAAAGAGTGTAACATCATTATTTGCTATGGCCTCA  
TCACTAATGAAATTGCTATGTTGCAGACTCGTGGTCGAGCTCGAGCTGATGAGAGCACCTA  
TGCACTTGTGGCTTCAAGTGGCTCAGGAGCTGTTGAACGTGACTACGTTAATATGTTCCGT  
GAGAAAATGATGTACAAGGCCATTTCAGCGCGTCCAGAAGATGCCACGGGAAGAGTATTTA  
CGTAAGATTTCAGACTTTCCAGTTGCAAAGTATCGTGGAAAAAAAAAATGAAAGCAAAAAGAG  
ATCAGCACAAAGACATTCAAGAAAAATCCTTCACTAATAACATTCCTATGCAAAAATTGCCAC  
AAGCTGATATGTTCTGGAGAAGACATACAAGTTATTGAAAACATGCATCATGTCAGTGTGAA  
AAAGGATTTCCAAAGCCTTTACCATACAAGAGAAAATAAGACACTTCAAGACAAGCATGCC  
GATCACCAGACAAATGGGGAATTTATATGTAAAGACTGTGGACAAGCGTGGGGAAATATGA  
TGGTTCACCGAGGTCTTGATCTGCCTTGTCTAAAGATTAGAAATTTTGTGGTTGTGTTTGAA  
GACAAGAAAACAACAAAGCACATTTTAAAGAAATGGGGAGAACTGCCCGTTAGGTTCCCTA  
GTTTGGATTATGCAGCTCATTGTCTTCAAGTGATGAAGACTAA

>mesitornis\_unicolor-mda5

ATGGCAGAGGAGTCCCGAGACGAGCGCTTCCTCTACATGATCTCCTGCTTCAGGCCGCGG  
CTGAAGCAGTTCATCCGGGTGCAGCCGGTGCTGGACCGGCTTCCCTTACTGAGCAGAGAG  
GAGAGGGAGAAGGTGCGGGCGGCGGCCCTGCAGCGGGGCGAGGTGGCGGGGGCGGAG  
GAGCTGCTGCGGGCCGTGGAGCGGGGACCCCGCGGGTGCGGCTGGTTCCACGAGTTCC  
TGCAGGCGCTGGAGCAGAGTGGCTGCAGCCTGGCCGCCTGCTACATGAACCCACGCCTC  
AGCCAGCTGCCCTCGCCAGCCGAGGAGGCCGACCACGACCTCTGTGTGCACTTGTTGCA  
GCTGCTCCACAGCTCACTGGTGGATAGAATGCGCACCGTGCAAGTGGCCGAGAAGTGTCT  
GCAGATGGGCATCTTCCAGGAGGAGGACCTGGATCGGATCCCACTGTTACTGAAAATCA  
TGGAACAAAGATGGTGCAAGGGAGCTATTGAGCAGAATAGTGCAAGAAGAAAGATTGTT  
CTCTCCTTTTTTGATTGCTCTGCGTGAAACCCAAACATGGAGACCTTGCAGATGATTAAAGT  
GAAATACAGGAGGAACAGAGAACAGACAAAATGGGATGAAGAAGAGTACAAATGAAGAAA  
CAGAAGTTACAGGTCAACCAGGATATGCCATAGTGGAGGATTTGAAACAGCAAGAAAATAT  
GAATGATAGTTTTAGCAATGAGACCAGTGTGTTGGAAACAACATAATGGAAAGAATTCCATA  
GTTTCAGAGTCGGATGTCTCCATAGGAGATGGAAGCGTCAGTAACTTGAATGAAAACCTGG  
GACAGAGCTGCACGACCAATGAAGATGAAGTGGAGAGCAGAGCTTCACCTGAGCCAGATC  
TGATCCTGAGAGATTACCAGATGGAAGTTGCAAAGCCAGCACTGAATGGGGAGAACATTAT  
TATATGTCTCCCTACAGGCAGTGGTAAAACCAGAGTGGCTGTTTACATTACCAAAGATCACT  
TAGATAAGAAGAAAAGAGCATCAGAGCCTGGAAAAGTTATAGTACTTGTTAATAAGGTACC  
GTTAGTAGAACAGCATTACGAAAGGAGTTTAAATCCATTCCCTGAAGCGCTGGTATCAGGTT  
ATCGGTTTAAAGTGGTGATTCTCAGCTGAAAATCTCATTTCCCTGAAGTTGTCAGAAGAAATGA  
TGTCATCATCAGCACAGCACAGATCCTTGAGAATTCAGTGTAAATGCAGCCAAAGAGGAT  
GAAGAAGGTGTCCACTTATCAGATTTTTCACTCATCATTATTGATGAGTGTATCACACTCA  
GAAGGAAGGTGTCTACAACAATATAATGCGACGTTACTTAAAAGAAAAGATGAAGAACAGG  
AAGCTGGCAAAAAGAAAACAAACCACTGACCCACAGCCTCAGATTCTGGGACTTACAGCCT  
CACCTGGTGTAGGAGGTGCAACATCCAACCTCAAAGCTGAAGAACATATTCTGAAAATCTG  
TGCCAATCTTGATGCGTGTAGAATCATGACTGTTGAAGAGCATGCCTCCAGCTGAAGAAC  
CAGGTGAAGGAACCGTATAAGAAGACTGTGATTGCAGATGACAAAAGAAGGGATCCATTTA  
GAGAGAGAATTACTGAGATCATGACAGACATTCAAACTATTGCCAGTTCTATCCAAAATCC

GAGTTTGGAAGCTCAGCCATATGAACAGTGGGTGATTAGAGAAGAAAGAAAAGCTGCAAAAG  
AAGAAAAGCGCAAGGAACGTGTCTGTGCAGAACACTTGAAGAAATACAATGATGCTCTGCA  
GATAAATGACACCATCCGAATGGTGGATGCATACAATCACCTAAATAACTTTTATAAGGAGG  
AGGAAAGTAAGAAGACGGTAGGGAGTGATGACGATGATGATGATGAACCAGCAGTATCAA  
AACAGGATGAAACAGATGAATTTCTTATAGGTTTATTTTCATGCAAAAAAGAACTGCTGGAA  
GAGTTGGCTAGAAAGCCGGAATATGAAAATGAGAAGCTCATACAGTTGCGAAACACTTTAA  
TGGAGGAATTCACAAAGACTGAGGAACCTAGAGGAATTATTTTCACAAAGACTCGGCTTAG  
TGCCTTTGCTCTATTCCAGTGGATTAAGGATAACCCAAAATTTGAAGAAGTGGGAATTAAGG  
CCCATTATCTTATTGGAGCTGGACATAACAGTGAAATTAAACCCATGACTCAGAATGAGCAA  
AGAGAAGTTATTGATAAATTCCGAGGTGGAATGTAAATTTACTTATTGCTACCACTGTAGC  
TGAGGAAGGCCTAGACATCAAGGAGTGTAACATCGTTATTTCGCTATGGCCTTGTACCAAT  
GAAATTGCTATGATGCAGGCTCGTGGTCGAGCTCGAGCTGATGAGAGCACCTATGCACTT  
GTGGCCTCAAGTGGCTCAGGAGCTGTTGAACGTGAAGATGTTAATATTTTCCGTGAGAAAA  
TGATGTACAAGGCCATTGAGCGTGTCCAGAAGATGCCACAGGAAGAGTATTTAAATAAGAT  
TCAGAATTTCCAGTTGCAAAGTATAGTGGAAAAACAAATGAAGGCCAAAGAGAGATCAGCAC  
AAGACATACAAGAAAAATCCTTCACTAATAACATTCTATGCAAAAAATTGCCACAACTGAT  
ATGTTCTGGAGAAGACATACAAGTTATTGAACACATGCATCATGTGAGTGTAAGAAGATT  
TCCAAAGTCTTTACCATACAAGAGAAAAACAAGACACTGCAAGATAAGCATGCCGATTACCA  
GACAAATGGGGAAATTATATGTAAAGATTGTGGACAAGCTTGGGGAAATATGATGGTTTAC  
CGAGGTCTTGACCTGCCTTGTCTAAAGATTAGAAATTTTGTGGTTGTGTTTGAAGACAAGAA  
AACAAACAAAGCAAATTTTTTAAGAAATGGGGAGAAGCTGCCCATCAGGTTCCCTAGTTTTGATT  
ATGCAGCTCATTGTCTTCAAGTGATGAAGATTAA

>mixornis\_gularis-md5

ATGGCAGAGAGCACCCGGTACGAGCGGTTCTGTACGTAATCTCCTGCTTCAGGCCGCGG  
CTGAGGCAGTTCATCCAGGTGCAGCCCGTGCTGGACCGGCTGCCGTGCTGAGCGCGGA  
GGACAGGGACAGGGTGCGAGCAGCCGCCAGCAGCGGGGCGCGATGGCGGGCGCGGA  
GGAGCTGCTGCGGGCCGTGGAGCGGGGGCCCCGCGGCTGCGGCTGGATCCCCGAGTTC  
CTGCAGGCGCTGGAGCACGGTGGCTGCAGCCTGGCCGCTGCTACGCCAGCCCCAGCCT  
GAGCCAGCTRCCCTCGCCGGCACAGGAGGCCGAGCACGACCTGTGCGTGCACCTGGTGC  
AGCTGCTGCACGGCACGCTGGTGGACAGGATGCGCACCGTGCCGGTGGCCGAGAAGTGC  
CTGGAGATAGGAATCTTCCAGGACGAGGACATGGATCGGATCCAGGCTGTTACTGACAAT  
CATGGGAACAGAGATGGTGCAGGGGAGCTACTGAGCAGAATAGTCCAGAAGAAAGATTGG  
TTCTCTTCTTTTTTGGTTGCTCTCCGTGAAACCCAAACATGAAGACCTTGACAGATGATTTAAG  
TGGAAATACAGGAGAGAAATAACAAAATGGGATGGAGCAGACTACAAACAAAGAGACAGAA  
GTTACAAGCCAACCTGGACACGTCATGGAGGAGAATTTGAAACAGGAAGAAAATGTGGAT  
GATAGTTTCAGCAGTGAGAACAGTGTGTTGGAAACATCCACAGAAAAGAGCTCTATGGTGT  
CAGAGTCAGATGTCTCCATAGGAGATAGAAGTGTGAGTAACCTGAATGAAGACGTGGGACA  
GAGCTGCACAACCAAGTGATTCAGATGAAGTGGAGAGAAGAGCCTCACCTCAGCCCGATCT  
GACCCTGAGAGATTACCAGATGGAAGTTGCCAAGCCAGCACTGAATGGGGAGAATATTATA  
ATATGTCTCCCTACGGGCAGTGGTAAACCAAGAGTGGCTGTTTACATTACCAAAGATCACT  
TGGATAAGAAGAGAAGAGCATCAGAGCCTGGAAAAGTCATAGTACTTGTTAATAAGGTTCC  
ATTGGTAGAACAGCATTTACAAGCAGAGTTTAGTCCATTCTGAAGCGTTGGTATCGGGTT  
ATTGGTTTAAGTGGTGATTCTCAGCTGAAAATCTCATTTCTGAAGTTGTCAGAAGAAATGA  
TGTCATCATCTGTACAGCACAGATCCTTGAGAATTCACTGTTAAATGCATCCAAGGAAGAAG

AAGAAGGTGTCCACTTATCAGATTTTTCCCTCATCATTATTGATGAGTGTTCATCACAACCTCAA  
AAGGAATGTGTCTACAACAATATAATGCGACGTTACTTAAAAGAAAAGATGAAGAACAGGAA  
GYTGGCAAAGAAAACAAACCACTGATCCACAGCCTCAGATTCTGGGACTTACAGCCTCA  
CCTGGTGTAGGAGGTGCAACATCCTACTCAAAAGCTGAAGAGCATATTTTGAAAATCTGTG  
CCAACCTCGATGCATGTAGAATTATGACTGTTGAAGAGCATGCCTCCCAGCTAAAGAATCA  
CGTGAAGGAACCGTCTAAGAAGACTGTGATTGCAGATGACAAAAAAGAGATCCATTTAAA  
GAGAGAATTAGTGAGATCATGACAGAAATACAAAATTATTGCCAGCTACATCCCAAGTCTGA  
GTTTGGAACCTCAGACATATGAACAGTGGGTGATCAGAGAAGAGAGAAGAGCTGCAAAAGA  
GGAAAAGCGCAGGGAACGTGTCTGTGCAGAACACTTGAAGAAATACAATGATGCTCTCCA  
GATAAATGACACCATCCGAATGGTGGATGCCTACAATCACCTAAATAACTTCTATAAAGAGG  
AGAAAAGTAAGAAGACAGTAAGGAGTGATGATGATGATGATTATGATGATGATGAAGA  
ACCAGCAGGATCTAAACAGGATGAAACAGATGAATTTCTAATAGGTTTATTTAATGCAAAAA  
AGAAACAGCTGGAAGAGTTGACTGGAAATCCAGAAAATGAAAATGAGAAGTTAATAAAGTT  
GAGAAATACTTTAATGGAGGAGTTCACAAAGACTGAGGAACCTCGAGGAATCATTTTCACA  
AAGACTCGTCTAAGTGCCTCTGCTCTATTCCAGTGGATTAAGGACAACCCAAAATTTGAAG  
AAGTGGGAATTAGGGCTCATTATCTTATTGGCTCTGGACATAAGAGTGAAATGAAACCCAT  
GACTCAGAATGAACAAAGGGAAGTCATTGATAAATTTTCGACGTGGAAATGTAAATTTACTAA  
TTGCTACTACTGTAGCTGAGGAAGGCCTGGACATCAAAGAGTGTAATATTGTTATTTCGCTAT  
GGCCTCGTCACCAATGAAATTGCTATGGTGCAGGCTCGTGGTAGAGCTCGAGCTGACGAA  
AGCACCTATGCTGTTGTGGCTTCGACTGGCTCAGGGGCTATTGAATGTGAATATGTTAATC  
TTTTTCGTGAGAAAATGATGTATAAGGCCATTACAGCGTGTCCAGAAGATGCCACAGGAAGA  
GTATTTAAATAAGATCGAGAGTTTCCAGTTGCAAAGTGTAAGTGGAAAAACAAATGAAGGCAA  
AGAGGGATCAGCTCAAGACATACAAGAAAAATCCTTCACTTATAAAATTTCTATGCAAAAAT  
TGCTCCAAGCYGATATGTTCCGGAGAAGACATCCAAGTTATTGAAAACATGCATCATGTCA  
GTGTGAAAAAAGATTTCCAAAGTCATTATCATACAAGAGAAAATAAAACACTGCAGGATAAG  
CAAGCTGATTACCAGACAAATGGGGAAATTATATGCAAAGACTGTGGACAAGCTTGGGGAA  
ATATGATGGTTCACCGAGGTCTTGACCTGCCTTGTCTAAAGATTAGAAATTTTGTAGTTGTG  
TTTGCAGACAAGAAAACAATAAGCAAATTTTAAAGAGATGGGGAGATCTGCCCATCAGGT  
TTCCTAGTTTTGATTATGCAGCTCATTGTCTTCAAGTGATGAAGATTAA

>molothrus\_ater-mda5

ATGGCAGAGGGCACCCGGGACGAGCAGTTCCTCTACATGATCTCCTGCTTCAGGCCGCG  
GCTGAAGCAGTTCATCCAGGTGCAGCCCGTGCTGGACCGGCTGCCCTCGCTGAGCGCGG  
AGGACCGGGACAGGGTGCGTGCGGCCGCCCTGCAGCGGGGCGCGGCGGGCGGCCG  
AGGAGCTGCTGCGGGCCGTGGAGCGGGGGCCCCGCGGCTGCGGCTGGATCCGCGAGTT  
CCTGCAGGCGCTGGAGCACGGCGGCTGCAGCCTGGCCGCTGCTACGCCAACCCACAGC  
CTCAGCCAGCTGCCCTCGCCGGCAGAGGAGGCCGAGCATGACCTCTGCGTGACCTGGT  
GCAGCTGCTGCACGGCACGCTGGTGGACAGGATGCGCGCCGGGCAGGTGGCCGAGAAG  
TGCCTGCAGATGGGAATCTTCCAGGACGAGGACGTGGATCGGATCCAGACTGTTACTGAC  
AATCATGGGAACAGAGATGGTGCAAGGGAGCTACTGAGCAGAATAGTCCAAAAGAAAGAC  
TGGTTCTCTTCTTTTTGATTGCTCTCCGTGAAACCCAACATGAAGACCTTGACAGATGATTT  
AAGTGGAAATACAGGAGAGAATAAACCAAGTGGGATGGAGCAGACTATGAATGAAGAAAC  
AGAAGTTACAAGACAACCAGGATACGTCATACAGGAGAATTGAAACAGGAAGAAAATGTG  
GATGATAGTTTCAGCAGTGAGAGCAGTCTGTTGGAAACATCCATAGAAAAGAATTCTGTGA  
TGACAGAGTCAGATGTCTCCATAGGAGATGAAAGTGTCAGTAACTTGAATGGAAGCCTGGA

ACAGAGCTGCACAACCAGTGATTGAGATGAAGTGGAGAAGAGAGACTCACCTGAGCCAGA  
TCTGACCCTGAGAGATTACCAGATGGAAGTTGCAAAGCCAGCATTGAATGGGGAGAATATT  
ATCATATGTCTCCCTACAGGCAGTGGTAAAACCAGAGTGGCTGTTTACATTACCAAAGATC  
ACTTGGATAAGAAGAAAAGAGCATCAGAGCCTGGAAAAGTCATAGTACTTGTTAACAAGGT  
TCCATTGGTAGAACAGCATTAAAAAGAGAGTTTGGTCCATTCCCTGAAGCGTTGGTATCAG  
GTTATTGGTTTAAGTGGTGATTCTCAGCTGAAAATCTCATTTCCTGAAGTTGTCAGAAGAAA  
TGATGTCATCATCAGTACAGCACAGATCCTTGAGAATTCAGTGTAAATGCATCCAAGGAAG  
ATGAAGAAAGTGTCCACTTATCAGATTTTTCCCTCATCATCATCGATGAGTGTATCATACT  
CAAAAGGAAGGTGTCTACAATAACATAATGAGACGTTACTTAAAAGAAAAGATGAAGAACA  
GGAAGCTGGCAAAAGAAAACAAACCACTGATCCCACAGCCTCAGATTCTGGGACTTACAG  
CCTCACCTGGTGTAGGAGGTGCAACATCCTACTCAAAGCTGAAGAGCATATTCTGAAAAT  
CTGTGCCAATCTTGATGCATGTAGAATTATGACTGTTGAAGAGCATGCCTCCCAGCTAAAG  
AATCAGGTGAAGGAGCCGTCTAAGAAGACTGTGATTGCAGATGACAAAAAAGGGATCCAT  
TTAAAGAGAGAATCACTGAGATCATGACAGAAATACAGAGCTATTGCCAGCTGCATCCAAA  
GTCTGAGTTTGGAACTCAGACATATGAGCAGTGGGTGATCAGAGAAGAGAGAAGAGCTGC  
GAAAGAAGAAAAACGCAGGGAACGTGTCTGTGCAGAGCACTTGAAGAAATACAATGATGCT  
CTCCAGATAAATGACACCATCCGAATGGTGGATGCCTACAATCACCTAAATAACTTTTATAA  
AGAGGAGAAAAGTAAGAAGACAGTAAGGAGTGATGATGATGATGATGATGATGAACCAGC  
AGTATCAAAACAGGATGAAACAGATGAATTTCTAATAGGTTTATTCCATGCAAAAAAGAAAC  
AGCTGAAAGAGTTGACTAGAAATCCAGAAAATGAAAATGAGAAGCTAACAAAGTTGAGAAA  
TACTTTAATGGAGGAGTTCACGAAGACTGAAGAACCTAGAGGAATCATTTTCACGAAGACT  
CGTCTAAGTGCCTTTGCTCTTTACCAGTGGATTAAGGACAACCCAAAATTTGAAGAAGTGG  
GAATTAAGGCCCATCATCTTATCGGCTCTGGACATAAGAGTGAAACGAAGCCGATGACTCA  
GAATGAGCAAAGGGAAATTATTGATAAATTTGATGTGGAATGTAAATTTACTAATTGCTA  
CTACTGTAGCTGAGGAAGGCCTGGACATCAAAGAGTGTAACATCGTTATTCGCTATGGCCT  
CGTCACCAATGAAATTGCTATGGTGCAGGCTCGTGGTAGAGCTCGAGCTGATGAAAGCAC  
CTATGCTCTTGTGGCTTCAAGTGGCTCAGGGGCTGTTGAACGTGAAAATGTTAATATTTTTC  
GTGAGAAAATGATGTATAAGGCCATTACAGCGTGTCCAGAAGATGCCACAGGAAGAGTATTT  
AAATAAGATTCAGGGTTTCCAGTTGCAAAGTATAGTGGAAAAACAAATGAAGGTGGTGAGA  
GATCAGCGCAAGACATACAAGAAAAATCCTTCACTAATAAAATTTCTATGCAAAAATTGCTC  
CAAGCCGATATGTTCTGGAGAAGACATACAAGTTATTGAAGACATGCATCATGTGAGTGTG  
AAAAAAGATTTCCAAAGTCTTTATCATACAAGAGAAAAATAAAACACTGCAAGATAAGCATGC  
TGATTACCAGACAAATGGGGAAATTATATGCAAAGACTGTGGGCAAGCTTGGGGAAATATG  
ATGGTTCACCGAGGTCTTGACCTGCCTTGCTAAAGATCAGAAATTTTGTGGTTGTGTTTGC  
AGACAAGAAAACAACAACAATATTTTTAAGAAATGGGGAGACCTGCCCATCAGGTTTCCTA  
GTTTTGATTATGCAGCTCATTGTCCTTCAAGTGATGAAGATTAA

>nannopterum\_brasilianum-mda5

ATGGCAGAGGCGTCCCGAGACGAGCGCTTCCTCTACATGATCTCCTGCTTCAGGCCGCGG  
CTGAAGCAGTTCATCCGGGTGCAGCCGGTGTGGACCGGCTGCCCTCGCTGAGCGCCAA  
GGACAGGGAGAAGGTGCGGGGCGGTGGCCCTGCAGCAGGGCGAGGTGGAGGGGGCAGA  
AGAGCTGCTGCGGGCCGTGGAGCGGGGACCCCGCGGGTGCAGGCTGGTTCCACGAGTTC  
CTGCAGGCACTGGAGCACGGCGGCTGCAGCCTGGCCGCCTGCTACGTGAACCCAGCCT  
CAGCCAGCTGCCCTCGCCGGCCGAGGAGGCCGACCACGACCTCTGCGTGCACCTTGGTGC  
AGCTGCTCCACAGCACGCTGGTGGACAGAATGCAGACCATGCAGGTGGCCGAGAAGTGC

CTGCAGATGGGCATCTTCCAGGACGAGGACCTGGATCGGATCCACACTGTTACTGACAAT  
CGTGGGAACAGAGACGGAGCAAGGGAGCTGTTGAGCAGAATAGTGCAGAAGAAAGATTG  
GTTCTCTCCTTTTTTATCGCTCTGCGTGAAACCCAACACGGAGGCCTTGCAGATGATTTA  
AGTGGAAATACAGGAGGAACAGAGAATAGACAGAATGGGGTGAAGGACAATACAAATGAA  
GAAACAGAAGTTACAAGCCAACCAGAATATGCTGTAATGAAGGATTGCAACAGCAAGAAA  
ATTTGAATAGTAGTTTCAGCAGTGAGAACAGTGTATTGGAACATCTATTGGAAGAATTCT  
GTAGTTTCAGAGTCAAATGTCTCCATCGGAGATGAAAGTGTGAGTAACCTTGAATGAAAACCT  
GGGACAGAGCTGCACAACCAGTCATTGAGATGAAGATGAAATGGAGAGCAGAGCTTCACC  
TGAGCCTGATCTGATCCTGAGAGATTACCAGATGGAGGTTGCAAGGCCAGCACTGAATGG  
GGAGAATATTATAATATGCCTCCCTACAGGCAGTGGTAAAACAGAGTGGCTGTTTACATT  
ACCAAAGATCACTTGGATAAGAAGAAAAGAGCATCAGAGCCTGGGAAAGTTATAGTACTTG  
TTAATAAGGTACCGTTGGTAGAACAGCATTACGAAAGGAATTTAATCCATTCTGAAGCGT  
TGGTATCAAGTTACTGTTTTAAGTGGTGATTCTCAGCTGAAAATCTCATTTCCTGAAGTTGT  
CAGAAGAAATGATGTCATCATCAGTACAGCACAGATCCTTGAGAATTCAGTGTAAATGCAG  
CCGAAGAAGATGAAGAAGGTGTCCACTTATCAGACTTTTCACTCATCATTATTGATGAGTGT  
CATCACACTCAAAAGGAAGGTGTCTACAACAATATAATGCGACGTTACTTAAAAGAAAAGAT  
GAAGAACAGGAAGCTGGCAAAAGAAAACAAACCACTGATCCCACAGCCTCAGATTCTGGG  
ACTTACAGCCTCACCTGGTGTGGGAGGTGCAACATCCTACTCAAAGCTGAAGAACATATT  
CTGAAAATCTGTGCCAATCTGGATGCATATAGGATCATGACTGTGCAAGAGCACGCCTCCC  
AACTGAAGAATCAAGTGAAGGAACCATATAAGAAGACTGTGATCGCAGATGACAAAAGAAG  
GGATCCATTTAGAGAAAGAATTACTGAGATCATGACAGACATTCAAACCTATTGCCAGCTCC  
ATCCAAAATCTGAGTTTGGAACTCAGCCATATGAACAGTGGGTGATCAGAGAAGAGAGAAG  
AGCTGCAAAAGAAGAAAAACGCAAGGAACGTGTCTGTGCAGAACACTTGAAGAAATACAAT  
GATGCTCTCCAGATAAATGACACCATCCGAATGGTGGATGCGTACAATCACCTAAATAACT  
TTTATAAGGAGGAGAAAAGTAAGAAGACCGTAAGGAGCGATGATGATGATGATGAACC  
AGCAGTATCAAAACAGGATGAAACAGATGAATTTCTAATAGGTTTATTTTCATGCAAAAAAGA  
AACAGCTGAAAGAATTGGCTAGAAAGCCAGAATATGAAAATCAGAAGCTAATACAGTTGCG  
AAACACTTTAATGGAAGAGTTCACGAAGACAGAGGAACCTAGAGGAATTATTTTCACAAAG  
ACTCGGCTAAGTGCCTTTGCTCTATTCCAGTGGATTAAGGATAACCCAAAATTTGAAGAAGT  
GGGAATTAAGGCCCATTTATCTTATTGGTGCTGGACATAACAGTGAAATTAACCCATGACTC  
AGAATGAGCAAAGGGAAGTTATTGATAAATTCCGAGGTGGGAATATAAATTTACTTATTGCT  
ACTACTGTAGCTGAGGAAGGCCTGGACATCAAAGAGTGTAACATCGTTATTCGCTATGGCC  
ATGTCACCAATGAAATTGCTATGGTGCAGGCTCGCGGTCGAGCTCGAGCTGATGAGAGCA  
CCTATGCACTTGTGGCTTCGAGTGGCTCAGGAGCTATTGAACGTGAAGATGTTAATATTTT  
CCGAGAGAAAATGATGTACAAGGCCATTGACGCTGTCCAGAACATGCCACAGGAAGAGTA  
TTTAAATAAGATTCAGAATTTCCAGTTGCAAAGTATAATGGAAAAACAAATGAAGGCAAAGA  
GAGACCAGCGCAAGACATACAAGAAAAATCCTTCACTAATAACATTCTATGCAAAAATTGC  
CACAAGCTGGTATGTTCTGGAGAAGATATACAAGTTATTGAAAACATGCATCATGTCAGTGT  
GAAAAAAGATTTCCAAAGTCTTTACCATACAAGAGAAAATAAGACACTGCAAGATAAGCATG  
CTGATTACCAGACAAATGGGGAAATTATATGTAAAGATTGTGGACAAGCTTGGGGAAATAT  
GATGGTTCACCGAGGCCTTGACCTGCCTTGTGTAAAGATTAGAACTTTGTGGTTGTGTTT  
GAAGACAAGAAAACAATAAAGCAAATTTTTAAGAAATGGGGAGAACTGCCCGTCACGTTCC  
CTAGTTTTGATTATGCAGCTCATTGTCCTTCAAGTGATGAAGATTAA

>neopelma\_chrysocephalum-mda5

ATGGAAGAGGGGGACCGGGACGAGCGGTTCTCTACATGATCTCCTGCTTCAGGTCGCG  
GCTGAAGCAGTTCATCCAGGTGCAGCCCGTGCTGGACCAGCTCCCCTCGCTGAGCGCGG  
AGGAGAGGGAGAAGGTGCGGGCGGCCGCCCTGCAGCGAGGCGGGGTGGCGGGGGCCG  
AGGAGCTTCTGCGGGCCGTGGAGCGGGGGCCCCGCGGCTGCGGCTGGTTCCACGAGTT  
TCTGCAGGCGCTGGAGCACGGCGGCTGTAGCCTGGCCGCCTGCTACGCCAACCCAGCC  
TCAGCCAGCTGCCCTCGCCGGCCGAAGAGGCCGACCACGACCTCTGTGTGCACCTGGTG  
CAGCTGCTCCACAGCACGCTGGTGGACAGGATGCGGACCGTGAGGTGGCCGAGAAGTG  
CCTGGAAATGGGCATCTTCAAGGAGGAGGACCTGGATCGGATCCACACTGTTACTGACAA  
TCGTGGGAACAGAGAGGGTGCAAGGGAGCTTCTGAGCAGAATAGTGCAGAAGAAAGATTG  
GTTCTCTCCTTTTCTGATTGCTCTCCGTGAAACCCAACATGGAGACCTGGCAAATGATTAA  
GTGGAAATACAGGAGGAACGGAGAATAGACAAAATGAGCTGAAGAACAGTACAAATGAAG  
AAACAGAAATTACAAGCCAACCAGGATATGTCATAATGGAGGATTTGAAACAGCAAGAAAA  
TGTGAATGATAGTTTCATCAGTGAGAGCAGTGTATTGAAACATCCATGGGAGAGAATTCT  
GTAGATTCAGAGTCAGATGTCTCCATAGGAGATGGAAGTGTCCGTAACCTTCAGTGAAAACC  
TGGGCCAGAGCTGCACAACCAGTGATTCAGATGAAGAGGAGAGGAGAGCTTCACCTGAGC  
CAGATCTGACTCTGAGAGATTACCAGATGGAAGTTGCAAAGCCAGCACTAAATGGGGAAAA  
TATTATAATATGTCTCCCTACAGGCACTGGTAAAACCAGAGTGGCTGTTTACATTACCAAAG  
ATCACTTGGATAAGAAGAAAAAGAGCATCAGAGCCTGGAAAAGTCATAGTACTTGTTAATAA  
GGTACCACTGGTACAACAGCATTTAGAAATCAGAGTTTCATCCATTCTGAAGCGTTGGTAT  
CAGGTTATTGGTTTAAAGTGGTGATTCTCAACTGAAAATCTCATTTCTGAAGTTGTCAGAAG  
AAATGATGTCATCATCAGTACAGCACAAATCCTTGAGAATTCAGTGATAAATGCAGACAAAG  
AAGATGAAGAAGGTGTCCACTTATCAGACTTTTCCCTTATCATTATTGATGAGTGTATCAC  
ACTCAGAAGGAAGGTGTCTACAACAATATAATGCGTCGTTACTTAAAAGAAAAGATGAAGAA  
CAGGAAGCTGGCAAAAGAAAACAAACCACTGATCCCACAACCTCAGATTCTGGGACTTACA  
GCCTCACCTGGTGTAGGAGGTGCAAAATCGTACTCAAAAGCTGAAGACCATATTCTGAAAA  
TCTGTGCCAATCTTGATGCATGTAGAATTATGACTGTTGAAGAGCATGAGGACCAGTTAAA  
GAATCAGGTGAAGGAGCCGTCCAAGAAGACTGTGGTTGCAAATGACAAAAAAGGGATCC  
ATTTAGAGAGGAAATTACTGAGATCATGACAGAAATACAAAACCTATTGCCAGTTCCATCCAA  
AATCTGAGTTTGGAACCTCAGACATATGAACAGTGGGTGATCAGAGAAGAGAGAAGAGCTG  
CAAAAGAAGAAAAACGCAAGGAACGTGTCTGTGCAGAACACTTGAAGAAATACAATGATGC  
TCTCCTGATAAATGACAGTATCCGAATGGTGGATGCATACAATCACCTAAATAACTTTTATA  
AGGAGGAGAAAAGTAAAAAGACAGTAAGGAGTGATGACGATGATGATGATGATGAACCAG  
CTGTATCAAAACAGGATGAAACAGATGAATTTCTAATAGGTTTATTTACATACAAAAAAGAAGT  
TGCTGAAAAAGTTGGCTGGAAAGCCAGAACATGAAAATGAGAATCTAATACAGTTGAGAAA  
TACTTTAATGGAGGAGTTCACGAAGACTGAGGAACCTAGAGGAATTATTTTACAAAGACT  
CGTCTAAGTGCCTTTGCTCTATTCCAGTGGATTCAAGACAACCCAAAATTTAAAGAAGTGG  
GAATTAAGGCCATTATCTTATCGGCTCTGGACATAACAGTGAAATGAAACCCATGACTCA  
GAATGAGCAAAGGGAAGTTATTGATAAATTCCGATGTGGAAATGTAAATTTACTTATTGCTA  
CTACTGTAGCTGAGGAAGGCTTGGACATCAAAGAGTGTAACATCGTTATTGCTATGGCCT  
TGTCATAATGAAATTGCTATGGTGCAGGCTCGTGGTCGAGCTCGAGCTGATGAGAGCAC  
CTATGCTCTTGTGGCTCCGAGTGGCTCAGGAGCTGTTGAACGTGAAGATGTTAATATTTTC  
CGTGAGAAAATGATGTATAAGGCCATTACGCGTGTCCAGAAGATGCCACAGGAAGAGTATT  
TAAATAAGATTAGAAATTCCAGTTGCAAAGTATAGTGGAAAAACAAATGAAGGCCAAAGAAA  
GATCAGCGCAAGACATACAAGAAAAATCCTTCACTAATAACATTCTTATGCAAAAATTGCCA



CAAAACGATATGTTCTGGAGAAGACATACAAGTTATTGAGTACATGCATCATGTCAGTGTGA  
AAAAAGATTTCCAAAACCTTTACCATACAAGAGAAAAATAAGACACTGCAAGATAAGCATGCC  
GATTACCAGACAAATGGGGAAATTATATGTAAAGATTGTGGACAAGCTTGGGGAAATATGA  
TGGTTCACCGAGGCCTTGACCTACCTTGTCTGAAGATTAGAAATTTTGTGGTTGTGTTTGCA  
GACAAGAAAACAACAAAGCAAATTTTAAAGAAATGGGGAGAACTGCCCCGTCAGGTTTCCTG  
ATTTTGATTATGCAGCTCACTGTCCTTCAAGTGATGAAGATTAA

>nestor\_notabilis-mda5

ATGGCAGCGGAGTTGCGAGACGAGCGGTGCCTCTACATGATCTCGTGCTTCAKGCCGCG  
GCTGAAGAAGTTCAKCCGGGTKCAGCCGGTGCTGGACCGGCTCCCCCTCGCTCAGCGTGG  
AGGACAGGGAGAAGGTGCGGGCGGCCGCGCTGCAGCGGGGCGAAGTGGAAGGGGCGG  
AGGAGCTGCTGCGGGCCGTGGAGCGGGGGCCCCGCGGGGGCGGCTGGTTCCGCGGCT  
CCGcGCGGGGGCTGGAGCACGGCGGCTGCGGCATGGCCGCCTGCTACGTGAACCCCGAG  
CCTCAGCCAGCTGCCCTCGCCAGCCGAGGAGGCCGACCACGACCTCTGCGTGCAGCTGG  
TGCAGCTGCTTCACAGCACACTGGTGGATAGTATGCGGACCGTGCAGGTGGCCGAGAAGT  
GCCTAGAGATGGGCATCTTCCAGGATGAGGACCTGGATGGGATCCATACTGTTACTGACA  
ACCGTGGAACAGAGAAGGTGCAAGGGAACCTATTGAGCCGACTAATGCAGAAGAAAGATT  
GGTTCTCTCGTTTTTTGATTGCTCTGCGTGAAACCCAACATGGAGGCCTTGCAGATGATT  
GAGTGGAATATAGGAGGAACAGAAGATAAACAATAATGGGATGAAGAACAGTATGAACAAA  
GAAAGAGAAGTTAAAAGCCAACAGGTTATGCCATAGTGGAGGATTTGAAGCAGCAAGAAA  
ATATGAATGATAGTTTTCAGCAGTGAGAACAATTTATTGGAAACATCTATTGGAAAGAATTCT  
GTAGTTTTCAGAGTCAGATGTCTCTATAGGAGTTGGATGTATCAGTAACTTCAATGAAAACCT  
GGGTCAAAGCTGCACAACCAAGTGATTCAGATGAAGAGGAGAGCAGAGCTTACCTGAGCC  
AGATCTGGTCCTGAGAGATTACCAAATGGAAGTTGCAAAGCCAGCACTGAATGGGGAGAA  
TATTATAATATGTCTCCCTACAGGCAGTGGTAAAACCAAGAGTGGCTGTTTACATTACCAAAG  
ATCATTGGATAAGAAGAAGAGAGCATCAGAGCCTGGAAAAGTTATAGTCCTTGTTAATAAG  
GTACCATTGGTAGAACAGCATTACGAAAGGAGTTTAATCCATTCCCTGAAGCGTTGGTATCA  
TGTTATTGGTTTAAGTGGTGATTCTCAGCTGAAAATCTTATTTCCCTGAAGTTGTCAGAAGAA  
ATGATGTCATCATTTGTACAGCACAGATCCTTGAAAATTCAGTCTAAATGCAGACAAAGAA  
GATGAAGAAGGTGTCAACTTATCAGATTTTTCACTCATCATTATTGATGAGTGTGCATCACAC  
TCAAAGGAAGGTGTCTACAATAACATAATGCGATGTTACTTAAAAGAAAAAGAGAAGAACA  
GGAAGCTGGCAAAAAGAAAAACAACCACTGATCCCACAGCCTCAGATTCTGGGACTTACAG  
CCTCACCTGGTGTAGGAGGTGCAACTTCTACTCCAAAGCTGAAGAACATATTCTGAAAAT  
TTGTGCCAGTCTTGATGCATGTAGAATCATGACTGTTGAGGAGCATGCCTCCAGCTGAAG  
AGTCAGGTGAAGGAACCTTTTAAAGAAGACTGTGATTGCAGATGACAAAAGAAGGGATCCAT  
TTAAAGAGAGAATAACTGAGATCATGACAGAGATTCAAAACTATTGCCAGCTCCATCCAAAA  
TCTGAGTTTGGAACTCAGCCGTATGAACAGTGGGTGATTAGAGAAGAGAAAAAAGCTGCAA  
AAGAAGAAAAACGCAAGGAACGTGTCTGTGCAGAACACCTAAAGAAATACAATGATGCTCT  
CCAGATAAATGATACCATCCGAATGATGGATGCGTACAATCACCTGAATAACTTTTATAAGG  
AGGAGAAAAGTAGGAAGACAGTAAGAAGTGATGATGATGATGGTGAACCAGCAGTAT  
CAAAACAGGATGAAACAGATTTATTTCTAATAGATTTATTTTCATGCAAAAAAGAAACATCTGA  
AAGAGTTGGCTAGAAAGCCAGAATATGAAAATGAGAAGCTAATAAAGTTGCGAAACACTTT  
AATGGAGGAGTTCACGAAGACTGAGGCACCTAGAGGAATTATTTTCACAAAGACACGGCTA  
AGTGCCCTTTGCTCTATTCCAGTGGATTAAGGATAACCCCAAATTTGAAGAAGTGGGAATTAA  
GGCCCATCATTTTATTGGTGCTGGACATAACAGTGAAATGAAACGCATGACTCAGAATGAG

CAAAGGGAAGTTATTGATAAATTCCGAGGTGGAAATCTGAACTTACTTATTGCTACTACTGT  
AGCGGAGGAAGGCCTAGACATCAAAGAGTGTAACATTGTTATTTCGCTACGGCCTCGTCAC  
CAATGAAATTGCTATGGTGCAGGCTCGTGGTTCGAGCTAGAGCTGATGAGAGTACCTATGC  
ACTTGTGGCTTCGGTTGGCTCAGGAGCTGCTGAACGTGAAGAAGTTAATATTTTCCGTGAG  
CAAATGATGTATAAAGCCATTCAGCGTATCCAGAAAATGCCACAGGATGAGTATTTAAAGAA  
GATCCAGAATTTCCAATGCCAAAATATAGTGGAAAAAGAAATTAAGGCAAAGAGACATCAG  
CACAAGACATACAAGAAAAATCCTTCAATAATAACATTCCCTATGCAAAAATTGCCACAAGCT  
GGTATGTTCTGGAGAAGACATACGAATTATTGAGAACATGCATCATGTCAGTGTGAAAAGA  
GATTTTCAAAGGCTTTACCATACAAGAGAAAATAAGACACTGCAAGATAAGAATGCTGATTA  
CCAGACAAATAGAGAAATTATTTGTAAAGATTGTGGACAAGCTTGGGGGAGCATGATGGTT  
CACCGAGGTCTTGACCTGCCTTGTCTAAAGATTATAAATTTTGTGATTGTGTTTGAAGACAA  
AAAGACAACAAAAGAAATTTTAAAGAAATGGAGAGAGCTGCCCTTCAAGTTCCTAGTTTTG  
ATTATGCAGCTCATTGTCTTTCAAGTGATGAAGATTAA

>nipponia\_nippon-mda5

ATGGCAGAGGAGTCCCGAGACGAGCGCTTCCTCTACATGATCTCCTGCTTCAGGCCGCGG  
CTGAAGCAGTTCATCCGGGTGCAGCCGGTGTCTGGACCGGCTTCCTCGCTGAGCGCAGA  
GGAGAGGGAGAGGGTGCGGGCGGCCGCCCTGCAGCGGGGCGAGGTGGAGGGGGCGGA  
GGAGCTGCTGCGGGCCGTGGAGCGGGGACCCcGGGGCTGCGGCTGGTTCCGGGAGTTC  
CTGCAGGCGCTGGGCCGCGGCGGCTGCAGCCTGGCCGCCTGCTACGTGAACCCAGCC  
TCAGCCAGTTGCCCTCGCCGGCCGAGGAGGCCGACCACGACCTCTGCGTGCACCTTGGTG  
CAGCTGCTCCACAGCACACTGGTGGATAGAATGCAGACCATACAGGTGGCCGAGAAGTGC  
CTGCAGATGGGCATATTCCAGGACGAGGACCTGGATCGGATCCCACTGTTACTGAGTAT  
CATGGGAACAGAGATGGTGAAGGGAGCTATTGAGCAGAATAGTGCAGAAGAAAGACTGG  
TTCTCTCCTTTTTTATTGCTCTGCGTGAAACCCAACATGGAGACCTTGCAGATGATTTAAG  
CGGAAGTACAGGAGGAACAGAGAATAGACAAAATGGGATGAAGAATAGTACAAACGAAGA  
AACAGAAGTTACAAGCCAACCAGGATATGCCATAGTGGAGGATTTGAAACAGCAAGAAGAC  
GTGAATGATAGTTTCAGCAGTGAGAACAGTGTATTGGAACATCTATTGGAAGAATTCTGT  
AGTTTCAGAGTCAGATGTCTCCATAGGAGATGGAAGTGTGAGTAACTTGAATGAAAACCTG  
GGACAGAGCTGCACAACCAAGTGATTGAGATGACAGTGAATTGGAGAGCAGAGCTTCACCT  
GAGCCAGATCTGATCCTGAGAGATTACCAGATGGAAGTTGCAAAGCCAGCACTGAATGGG  
CAGAATATTATAATATGTCTCCCTACCGGCAGTGGTAAAACCAGAGTGGCTGTTTACATTAC  
CAAAGATCACTTGGATAAGAAGAAAAGAGCATCAGAGCCTGGAAAAGTTATAGTACTTGTT  
AATAAGGTACCGTTGGTAGAACAGCATTTACGAAAGGAGTTTAATCCATTCTGAAGCGTT  
GGTATCAGGTTATTGGTTTAAAGTGGTGAATTCTCAGCTGAAAATCTCATTTCTGAAGTTGTC  
AGAAGAAATGATGTCATCATCAGTACAGCACAGATCCTTGAGAATTCAGTGTAAATGCAGC  
CAAAGAAGATGAAGAAGGTGTCTACTTATCAGATTTTTTCACTCGTCATTATCGATGAGTGT  
ATCACACTCAAAGGAAGGTGTCTACAACAATATAATGCGACGTTACTTAAAAGAAAAGATG  
AAGAACAGGAAGCTGGCGAAAGAAAACAAACCACTGATCCCACTGCCTCAGATTCTGGGA  
CTTACAGCCTCACCTGGTGTAGGAGGTGCAACATCCTACTCAAAGCTGAAGAACATATTC  
TGAAAATCTGTGCCAATCTTGATGCATGTAGAATCATGACTGTTTCAGGAGCATGCCTCCCA  
ACTGAAGAATCAGGTGAAGGAACCGTATAAGAAGACTGTGATTGCAGATGACAAAAGAAGG  
GATCCATTTAGAGAGAGAATTACTGAGATCATGACAGACATTCAAACACTATTGCCAGCTCCA  
TCCAAAATCTGAGTTTGAAGTCAAGCGTATGAACAGTGGGTGATTAGAGAAGAGAGAAGA  
GCTGCAAAAGAAGAAAAGCGCAAGGAACGTGTCTGTGCAGAACACTTGAAGAAATACAATG

ATGCTCTCCAGATAAATGACACCATCCGGATGGTGGATGCATACAATCACCTAAATAACTTT  
TATAAGGAGGAGAGAAAAGTAAGAAGACAGTAAGGAGTGATGATGATGATGATGATGAACCAG  
CAGTGTCAAAACAGGATGAAACAGATGAATTTCTAATAGGTTTATTTTCATGCAAAAAAGAAA  
CAGCTGAAAGAGTTGGCTAGAAAAGCCAGAATATGAAAATGAGAAGCTAATACAGTTGCGAA  
ACACTTTAATGGAGGAGTTCACGAAGACTGAGGAACCTAGAGGAATTATTTTCACAAAGAC  
TCGGCTAAGTGCTTTTGCTCTATTCCAGTGGATTAAGGATAACCCAAAATTTGAAGAAGTGG  
GAATTAAGGCCCATATTATCTTATCGGTGCTGGACATAACAGTGAAATTAACCCCATGACTCAG  
AATGAGCAAAGGGAAGTTATTGATAAATCCGAGGTGGAAATGTAAATTTACTTATTGCTAC  
AACTGTAGCTGAGGAAGGCCTAGACATCAAAGAGTGCAACATTGTTATTTCGCTATGGCCTC  
GTCACCAATGAAATTGCTATGGTGCAGGCTCGTGGTTCGAGCTCGAGCTGATGAGAGCACC  
TATGCACTTGTGGCTTCGAGTGGCTCAGGAGCTGTTGAACGTGAAGATGTTAATATTTTCC  
GTGAGAAAATGATGTATAAGGCCATCCAGAGTGTCCAGAAGATGCCACAAGAAGAGTATTT  
AAATAAGATTCCAGAATTTCCAGTTGCAAAGTATAGTGGA AAAACAAATGAAGGCAAAGAGA  
GATCAGCGCAAGACATACAAGAAAAATCCTTCACTAATAACATTCCTATGCAAAAATTGCCA  
CAAGCTGATATGTTCTGGAGAAGACATACAAGTTATTGAAAACATGCATCATGTCAGTGTGA  
AAAAAGATTTCCAAAGTCTTTACCATACAAGAGAAAAATAAGACACTGCAAGATAAGCATGCA  
GATTACCAGACAAATGGGGAAATCATATGTAAAGATTGTGGACAAGCTTGGGGAAATATGA  
TGGTTCACCGAGGTCTTGACCTGCCTTGTCTAAAGATTAGAAATTTTGTGGTTGTGTTTGAA  
GACAAGAAAACAACAAAGCAAATTTTTAAGAAATGGGGAGAACTGCCCATCAGGTTCCCTA  
GTTTTGATTATGCAGCTCATTTTCCTTCAAGTGATGAAGATTAA

>numida\_meleagris-mda5

ATGTCGGAGGAGTGCCGAGACGAGCGCTTCCTCTACATGATCTCCTGCTTCAGGCCGCGG  
CTGAAGTGCTGCATCCGCGTGCAGCCGGTGCTGGACTGGCTGCCCTCGCTGAGCGCAGA  
GGAGAAGGAGAGGGTGCGGGCGGCAGCGCTGCAGCGCGGCGAGGTGGAGGGGGCCGA  
GGAGCTGCTGCGCGCCGTGGAGCGCGGCCCCCGTGGCCCCGGCTGGTTCCATGAGTTC  
CTGCTGGCGCTGAAGAAAGGCGGCTGCGACCTGGCCGCTTGCTACGTGAACCCAGCCA  
GCTGCCCTCGCCCCGGGAGGAGGCCGACCATGACCTCTGCGTGCACCTGGTGCAGCTGC  
TGTACGGCACGCTGGTGGATAACATGCAGACCAGGCAGGTGGCCGAGAAGTGCCTGCAG  
CTGGGCATCTTCCAGGAGGAGGACCTGGGTCTGGATTGATGCTGTTACTGACAGTCATGGG  
AACAGAGGTGGTGCAAGGGAAGTGTGAGCAGAATAGTGCAGAAGAAGGATTGGTTCTCT  
CCGTTTTTGA CTGCTCTGCGTGAAACTCAACATGAAAGCCTTGCAAGATGATTTAAGTGGAA  
ATACAGGAGGAACAGAGAATGAAGAAAATGAGTTGAAGAATAGTACAAGGAAAGAAACAGA  
AGATGCAAGCGAACCAGGATATGCTGTAATGGAGGATATGAAACAGCAAGAAAATCTGGAT  
GATAGTTTTGTGAGAGAGAACAGTGTATTGGAACATCTATTGGAAGAGCTCTGAAGTTTC  
AGAATCAGTTGTGCTGTAGGAGGTGCAAGTGTGAGTAACCTGAATGAAAACCTGGGACAG  
AGCAGTGCGACCAAGTGAATCAGGTGAAGATGAAGCGGACAGCAGAGCTTCACCTGAGCCA  
GATCTCATCCTGAGAGATTACCAGATGGAAGTTGCAAAACCAGCACTGAATGGGGAGAATA  
TTATAATATGTCTCCCTACAGGCAGTGGCAAACTAGAGTGGCTGTTTACATTACCAAAGAT  
CACTTGGATAAGAAGAAAAAAGCATCAGAGCCAGGAAAAGTTATAGTACTTGTTAATAAGGT  
ACCGTTAGTGGAACAGCATTACGAAAGGAGTTTAATCCATTCCCTGAAACGCTGGTATCAG  
GTTATTGGTTTAAGTGGTGAATCTGAGCTGAAAATCTCATTTCCCTGAAGTTGTCAAAAGAAA  
TGATGTCATCATCTGTACAGCACAGATCCTGGAGAATTCAGTGTAAATGCAACTGAAGAG  
GATGAAGGTGTCCGCTTGTGAGATTTTTCACTCATCATTATTGATGAGTGCCATCACACTCA  
AAAGGAAGGTGTTTACAACAATATAATGCGACGTTACTTAAAGAAAAGATCAAGAACAGAA

AGCTGGCAAAAGAAAACAAACCTTTGACTCCGCAGCCTCAGATTCTGGGACTTACAGCCTC  
ACCTGGAGTCGGAGGTGCAAGAACCAACTCAAAAGCTGAAGAACATATTCTGAAAATCTGT  
GCCAATCTTGATGCATGCAGAATAATGACTGTAAAGAGCATGCCTCCCAACTGAAGAATC  
AGGTGAAGGAGCCATTTAAGAAGACTGTGATTGCAGATGACAAAAGAAGGGATCCATTTAG  
AGAAAGAATTATTGAGATCATGAAAGACATTCAAAAATATTGTCAGCTTTATCCAAAATCTGA  
GTTTGGATCTCAGCCATATGAACAATGGGTTGTTAGGGAAGAGAAAAGAGCTGCAAAAGAA  
GAAAAACGCAAGGAACGTGTCTGTGCAGAACACTTGAAGAAATATAATGATGCACTCCAAA  
TTAATGATACCATTCTGAATGGTTGATGCATACAATCACCTAAATAACTTTTATGAGGAGCTA  
AAAAGGAAGAAGACAGTAGAGAGTGATGATGATGAAGAACCCTTAGTATCAAAACAGGATG  
AAACAGATGAATTTTTAATAGGTTTATTTTCATGCAAAAAAGAAAACAGCTGGAAGAGTTGGCT  
AGAAAGCCAGAATATGACAATGAGAAGCTAATGAAGCTGCGAAACACTTTAATGGAAGAGT  
TCACAAAGACTGAAGAATCTAGAGGAATTATTTTCACAAAGACTCGGCAAAGTGCCTTAGCT  
CTATACCACTGGATTATGGATAACCCAAAATTTGAAGAAGTGGAATCAAAGCTCATTATCT  
TATTGGTGCTGGACAGAATAGTGAACTAAACCTATGACTCAGAATGAGCAAAGGGGAAGTC  
ATTGATAAATTCCGAGGTGGAAGTATAAATTTACTTATTGCTACTACTGTAGCTGAGGAAGG  
CCTAGACATCAAAGAGTGTAACATTGTTATTCGCTACGGTCTGGTCACCAATGAAATTGCTA  
TGGTACAGGCCCCGTGGTCGAGCTCGAGCTGATGAGAGCACTTATGCACTTGTGGCTTCAT  
GTGGCTCAGGAGCTGTTGAACGCGAAGATGTAAATATTTTCCGTGAAAATATGATGTATAA  
GGCCATTACGCGTGTCCAGGAGATGCCGCCTGACAAGTATTTAGATAAGATTACAGGGCTTC  
CAGTTGCAAAGTATAGTAGAAAAACAAATGAAAGCAAAGAGAGATCAGCGTAAGACATACA  
AGAAAAACCCCTTCACTAATAAAAATTCCTATGCAAGAATTGCCACAAGCTGATATGTTCTGGA  
GAAGATATACAAGTCATTGAAAATATGCATCATGTCAGTGTGAAGAAAGATTTCCAACATCT  
TTACCATAAAAGAGAAAAATAAGACACTGCAAGATAAGCATGCTGATTACCAGGCAAATGTG  
GAAATTATATGTAAAGATTGTGGACAAGCTTGGGGAAATATGATGGTTTATCGAGGAGCTTGA  
CCTGCCTTGTCTAAAGATTAGAAATTTTGTGGTGGCTTTTGAAGACAAAAAAATAACAAAGG  
AAATTTTCAAGAAATGGGGAGAACTACCCATCAGTTTTCTGATTTTGATTATGCAGCTCAT  
TGTCTTCAAGTGATGAAGATTAA

>oceanites\_oceanicus-mda5

ATGGCAGAGGCGTCCCGAGACGAGCGCTTCCTCTACATGATCTCCTGCTTCAGGCCGCGG  
CTGAAGCAGTTCATCAGGGTGCAGCCGGTGTGACCGGCTTCCCTTGTGAGCGCAGC  
GGAGAGGGAGCAGGTGCGGGCCGTGCGCCCTGCAGCGGGGCGAGGTGGAGGGGGCGGA  
GGAGCTGCTGCGGGCCGTGGAGCGGGGGCCCCGCGGGTGC GGCTGTTCCACGAATTC  
CTGCAGGCGCTGGAGCACGGCGGCTGCAGCTTGGCTACCTGCTACGTGAACCCTAGCCT  
CAGCCAGCTGCCCTCGCCGGCCGAGGAGGCCGACCACGACCTCTGCGTGCACCTGGTGC  
AGCTGCTCCACAGCACACTGGTGGATAAAATGCAGACCATGCAGGTGGCCGAGAAGTGCC  
TGCAGATGGGCATCTTCCAGGATGAGGACCTGGATCGGATCCACACTGTTACTGACAATC  
GTGGAAACAGAGATGGTGCAAGGGAGCTATTGAGCAGAATAGTGAGAAGAAAGATTGGT  
TCTCTCCTTTTTTGGTTGCTCTGCGTGAAACCCAACATGGAGGCCTTGCAGATGATTTAAGT  
GGAAATACGGGAGGAATAGAGAATACACAAAATGGGATGAAGAACAGTACAAATGAAGAAA  
CAGTAGTTACAAACCAACCAGGATATGCTGTAGTGGAGGATTTGAAACAACAAGAAAATGT  
GAATGATAGTTTCAGCAGTGAGAACAGTTTATTGGAAGCATCTGTTGGAAGAATTCTGTAG  
TTTCAGAGTCAGATGTCTCCATAGGAGATGGAAGTGTCAGTAACTTGAATGAAAACCTGGG  
ACAGAGCTGCACAACCAGTGATTGAGATGAAGATGAAGTGGAGAGCAGAGCTTCACCTGA  
GCCAGATCTGATCCTGAGAGATTACCAGATGGAAGTTGCAAAGCCAGCACTGAATGGGGA

GAATATTATAATATGTCTCCCTACAGGCAGTGGTAAAACCAGAGTGGCTGTTTACATTACCA  
AAGATCACCTGGATAAGAAGAAAAGAGCATCAGAGCCTGGAAAAGTTATAGTACTTGTTAA  
TAAGGTACCGTTGGTAGAACAGCATTTACGAAAGGAGTTTAATCCATTCTGAAGCGTTGG  
TATCAGGTTATTGGTTTAAAGTGGTGATTCTCAGCTGAAAATCTCATTTCTGAAGTTGTCAG  
AAGAAATGATGTCATCATCAGTACAGCACAGATCCTTGAAAATTCAGTGTAAATGCAGCYG  
AAGAAGATGAAGAAGRTGTCCATTTATCAGATTTTTCACTCATCATTGTCGATGAGTGTCAT  
CACACTCAAAGGAAGGTGTCTACAACAATATAATGAGACGTTACTTAAAAGAAAAGATGAA  
GAACAGGAAGCTGGCAAAAGAAAACAAACCGCTGATCCACAGCCTCAGATTCTGGGACT  
TACAGCCTCACCTGGTGTAGGAGGTGCAACATCCTACTTAAAAGCTGAAGAACATATTCTG  
AAAATCTGTGCCAATCTTGATGCATGTAGAATCATGACTGTTGAAGAGCATGCTTCCCACT  
GAAGAATCAGGTGAAGGAACCGTATAAGAAGACTGTGATTGCAGATGACAAAAGAAGGGA  
TCCATTTAGAGAGAGAATTACTGAGATCATGACAGACATTCAAACCTATTGCCAGCTCCATC  
CAAATCTGAGTTTGGAACTCAGCCATATGAACAGTGGGTGATTAGAGAAGAGAGAAGAGC  
TGCAAAAGAAGAAAAACGCAAGGAACGTGTCTGTGCAGAACACTTGAAGAAATACAATGAT  
GCTCTCCAGATAAATGACACCATCCGAATGGTGGATGCGTACAATCACCTAAATAACTTTTA  
TAAGGAGGAGAAAAGTAAGAAGACAATAAGGAGTGATGATGATGATGAACCAGCAGTATCA  
AAACAGGATGAAACAGATGAATTTCTAATAGGTTTATTTACACAAAAAAGAAACAGCTGAA  
AGAGTTGGCTAGAAGGCCAGAATACGAAAATGAGAAGCTAATACAGTTGCGAAATACTTTA  
ATGGAGGAGTTCACGAAGACTGAGGAACCTAGAGGAATTATTTTCACAAAGACTCGACTAA  
GTGCCTTTGCCCTATTCCAGTGGATTAAAGATAACCCAAAATTTGAAGAAGTGGGAATTAAG  
GCCCATTATCTTATCGGTGCTGGACATAACAGTGAAATTAACCCCATGACTCAGAACGAGC  
AAAGGGAAGTTATTGATAAATTCCGAGGTGGGAATGTAAATTTACTTATTGCCACTACTGTA  
GCTGAGGAAGGCCTAGACATCAAAGAGTGTAACATCGTTATTCGCTATGGTCTTGTCACCA  
ATGAAATTGCTATGGTGCAGGCCCGCGGTGCGAGCTCGAGCTGATGAAAGCACCTATGCAC  
TTGTGGCTTCAAGTGGCTCAAGAGCTGTTGAACGTGAAGATGTTAATATTTTCCGTGAAAAA  
ATGATGTATAAGGCCATTACAGCATGTCCAGAAGATGCCACAGGAGGAGTATTTAAATAAGA  
TTCAGAATTTCCAAGTGCAAAGTATAGTGGAACAAATGAAGGCAAAGAGAGATCAGCG  
CAAGACATACAAGAAAAATCCTTCACTAGTAACATTCCTATGCAAAAATTGCCACAAGCTGA  
TATGTTCTGGAGAAGACATACAAGTTATTGAAAACATGCATCATGTGAGTGAAAAAAGAT  
TTCCAAAGTCTTTATCATACAAGAGAAAAATAAGACACTGCAAGATAAGCATGCCGATTACCA  
GACAAATGGGGAAATTATATGTAAAGATTGTGGACAAGCTTGGGGAAATATGATGGTTCAC  
CGAGGTCTTGACCTGCCTTGTCTAAAGATTAATAATTTTGTGGTTGTGTTTGAAGACAAGAA  
AACAACAAAGCAAATTTTAAAGAAATGGGGAGAACTGCCCATCAGGTTTCCTAGTTTTGATT  
ATGCAGCTCATTGGCCTTCAAGTGATGAAGATTAA

>odontophorus\_gujanensis-mda5

ATGTCCGAGGAGTGCCGAGACGAGCGCTTCCTCTACATGATCTCCTGTTTCAGGCAGCGG  
CTGAAGCGCTGCATCCGAGTGACGCCGGTGCTGGACTGGCTGCCCTCGCTGAGCGCAGA  
GGAGAAGGAGAGGGTGCGTGCGGCGGCGCTGCAGCGCGGAGAGGTGGAGGGGGCCGA  
GGAGCTGCTGCGCGCCGTGGAGCGCGGACCCCGCGACCCCGGCTGGTTCACCGAGTTC  
CTGCTGGCGCTGGAGAAAGGCGGCTGCGACCTGGCCGTTTGCTACGTGAACCCTAGCCA  
GCTGCCCTCGCCCCGGGAGGAGGCCGACCACGATTTGTGCGTGACCTGGTGCAGCTGT  
TGCACGGCACGCTGGTGGATAACATGCAGACCAGGCAGGTGGCCGAGAAGTGCCTGCAG  
TTGGGCATCTTCCAGGAGGAGGACATGATTCCGATTGATGCTGTTACTGACAGTCATGGGA  
ACAGAGAAGGTGCAAGGGAGCTGTTGAGCAGAATAGTGCAGAAGAAGGATTGGTTCTCTC

AGTTTTTGGTTGCTCTGCGTGAACTCAACATGAAAACCTTGCAGATGATTTAAGTGGAAT  
ACAGGAGGAATAGAGGATAATGAAAATGAGTTGAAGGACAGTACAAGCAAAGAAACAGAA  
GCTGCAAGCCAACCAGAACATGCTGCAAAGGAGGATCTGAAGCAGCAAGAAAATTTGGAT  
GATAGCTTTGTCAGGGAGAGCAGTGTATTGAAACATCTGTTGAAAGAACTCTGTAGTTT  
CAGAATCAGTTGTCAGTGTAGGAGATACAAGTATCAGTAACTTGAATGAAAACCTGGGACA  
GAGCAGCACAAACCAGTGATTGAGGTGAAGATGAAGCAGAAAGCAGAGCTTCACCTGAGCC  
AGATCTCATCCTGAGAGATTACCAGATGGAAGTTGCAAACCCAGCACTGGATGGGGAGAAT  
ATTATAATATGTCTCCCTACAGGCAGTGGCAAACCCAGAGTGGCTGTTTACATTACCAAAGA  
TCACCTGGATAAAAAGAAAAAAGCATCAGAGTCAGGAAAAGTTATAGTACTTGTTAATAAGG  
TACCATTAGTGGAACAGCATTTACGAAGGGAGTTTAATCCATTCCTGAAACGCTGGTATCG  
GGTTATTGGTTTAAAGTGGTGATTCTGAGCTGAAAATTTCAATTCCTGAAGTTGTCAGAAGAA  
ACGATGTCATCATCTGTACTGCACAGATCCTGGAGAATTCAGTGTAAATGCAACTGAAGA  
CGATGAAGGTGTCCACTTGTGAGATTTTTCACTCATCATTATTGATGAATGCCATCACACTC  
AAAAGGAAGGTGTTTATAACAACATAATGCGACGTTACTTAAAAGAAAAGATCAAAAACAAA  
AAGCTGGCAAAAGAAAACAAACCTTTGATCCCGCAGCCTCAGATTCTGGGACTTACAGCCT  
CACCTGGAGTTGGCGGTGCAAGAACCCTACTCAAAGCTGAAGAACATATTCTGAAGATCTG  
TGCCAATCTTGATGCATGCAAAATCATGACTGTTACAGAGCATGCCTCCAGCTGAAGGAT  
CAGGTGAAGGAGCCATTTAAGAAGACTGTGATTGCAGATGACAAAAGAAGGGATCCATTTA  
GAGAAAGAATTATTGAAATCATGAAAGAGATTGAAAAATATTGCCAGCTATATCCAAAATCT  
GAGTTTGGCTCTCAACCATACGAACAGTGGGTGATTCCGGAAGAGAGGAAAGCTGCAAAA  
GAAGAAAAACGTAAGGAACGCGTCTGTGCAGAACACTTGAAGAAATATAATGATGCACTGC  
AAATTAATGATACCATCCGTATGGTTGATGCGTACAATCACCTAAATAACTTTTATAAGGAG  
CTGAAAAGGAAGAAGACAGTAGGGAGTGATGACGATGAAGAACCATTAGTATCAAAACAG  
GATGAAACAGACGAATTTCTATTAGGTTTATTTTCATGCAAAAAAGAAACAGCTGAAAGAATT  
GGCTAGAAAGCCAGAATATGACAATGAGAATCTAATGAAGCTGCGAAACACTTTAATGGAA  
GAGTTCACAAAGACTGAAGAATCTAGAGGAATTATTTTCACAAAGACTCGGCAAAAGTGCCCT  
TAGCTCTATACCACTGGATTATGGATAACCCAAAATTTGAAGAAGTGGAATCAAAGCTCAT  
TATCTTATTGGTGCTGGACACAATAGTGAACTAAACCTATGACTCAGAAATGAACAAAGGGA  
AGTCATTGATAAATCCGAGTTGGAAGTATAAATTTACTTATTGCTACTACTGTAGCTGAGG  
AAGGCCTAGACATTAAAGAGTGTAACATTGTTATTCGTTATGGTCTGGTCACCAATGAAATT  
GCTATGGTGCAGGCCCGTGGTTCGAGCTCGAGCTGATGAAAGCACTTATGCACTTGTGGCT  
TCATGTGGCTCAGGAGCTGTGGAGCGCGAAGATGTGAATGTTTTCCGTGAAAATATGATGT  
ATAAGGCCATTGAGCGTGTCCAGAGGATGCCACCAGAAGAATATTTAAATAAGATTGAGGA  
CTTCCAGTTGCAAAGTGTAATGGAAAAACAAATGAAGGCCAAAGAGAGATCAGCATAAAACC  
TATAAGAAGAACCCTTCACTAATAACATTCTGTGTAAGAATTGTCACAAGCTGATATGTTC  
TGGAGAGGACATACAAGTTATTGAAAATATGCATCATGTCAGTGTAAGAAAAAGATTTCCACC  
ATCTTTACCATAAAAAGAGAAAAATAGGACACTGCAAGAAAAGCATGCTGATTACCAGACAAAT  
GTGGAATTATATGTAAAGATTGTGGACAAGCTTGGGGAAATATGATGGTTTATCGAGGTC  
TTGATCTGCCTTGTCTAAAAATTAGAACTTCGTGGTTGCTTTTGAAGACAAGAAAACAAAA  
AAGGATATTGTCAAGAAATGGGGAGAACTGCCTGTCAGGTTTCCTGACTTTAATTATTCAGC  
TCATTGTCCTTCAAGTGATGAAGATTAA

>opisthocomus\_hoazin-mda5

ATGGCAGAGCAGCCCCAGGACGAGCGCTTCCTCTACCTGATCTCCTGCTTCAGGCCGCGG  
CTGAAGCAGTTCATCCGGGTGCAGCCGGTGCTGGACCGGCTTCCTCGCTGAGCGCGGC

GGACAGGGAGAAGGTGCGGGCGGCCACCCTGCAGCGGGGCGAGGTGGAGGGGGCGGA  
GGAGCTGCTGCGGGCCGTGGAGCGGGGGCCCCGCGAGTGCGGCTGGTTCCACGAGTTC  
CTGCAGGCTCTGGAGCACGGCGGCTGCAGCCTGGCCGCCTGCTACGTGAACCCCAGCCT  
CAGCCAGCTGCCCTCGCCGGCTCAGGAGGCGGACCACGACCTCTGCGTGCACTTGGTGC  
AGCTGCTCCATAGCACGCTGGTGGACAGAATGCAGACCGTGCAGGTGGCCGAGAAGTGC  
CTGCAGATGGGCATCTTCCAGGACGAGGACCTGGATCGGATCCATGCTGTGACTGACAAT  
CGTGGGAACAGAGATGGTGAAGGAGCTATTGAGCAGAATAGTGCAGAAGAAAGATTGG  
TTCTCTCCTTTTTTGATTGCTCTGCGTGAAACCCAACATGGAGGCCTTGCAGATGATTTAAG  
TGGAATACAGGAGGAACAGAGAATACACAAAATGGAATGAAGAACAGTACAAAAGAAGAA  
ACAGAAGTTGCAAGCCAACCAGGATATGCTGTAGTGGAAGATTTGAAACAGCAAGAAAATG  
TGAATGATCATTTTCATCAGTGAGAACAGTGTATTGGAACATCTATTGTAGTTTCAGAGTCA  
GATGTCTCCATAGGAGATGGAAGTGTGAGTAACCTGAATGAAAACCTGGGACAGAGCTGCA  
CAACCAGTGATTCAGATGGAGATGAAGTGGAGAGCAGAGCTTCACCTGAGCCAGATCTGA  
TCCTGAGAGATTACCAGATGGAAGTTGCAAAGCCAGCACTGAATGGGGAGAATATTATAAT  
ATGTCTCCCTACAGGCAGTGGTAAAACCAGAGTGGCTGTTTACATTACCAAAGATCACTTG  
GATAAGAAGAAAAGAGCATCAGAGCCTGGAAAAGTTATAGTGCTTGTTAATAAGGTACCAT  
TGGTAGAACAGCATTTACGAAAGGAGTTAATCCATTCCTGAAGCGTTGGTATCAGGTCAC  
TGGTTTAAGTGGTGATTCTCAGCTGAAAATCTCATTTCTGAAGTTGTCAGAAGAAATGATG  
TCATCATCAGTACAGCACAGATCCTGGAGAATTCAGTGTTAAATGCAGCCAAAGAAGATGA  
AGAAGGTGTCCACTTATCAGATTTTTCACTCATCATTATCGATGAATGTCATCACTCAAA  
AGGAAGGTGTCTACAACAACATAATGCGACGTTACTTAAAAGAAAAGATGAAGAACAGCAA  
GCTGGCAAAAGAAAACAAACCACTGATCCCACAGCCTCAGATTCTGGGACTTACAGCCTCA  
CCTGGTGTAGGAGGTGCAACATCCTACTTAAAAGCTGAGGAACATATTTTGAAAATCTGTG  
CCAATCTTGATGCGTGTAGAATCATGACTGTTGAAGAGCACACCTCCCAACTGAAGAATCA  
GGTGAAGGAACCGTATAAGAAGACTGTGATTGCAGACGACAAAAGAAGGGATCCATTTAGA  
GAGAGGATTACTGAGATCATGACAGACATTCAAACCTATTGCCAGCTCCATCCAAAATCTG  
AGTTTGGAACTCAGCCATATGAACAGTGGGTGATTAGAGAAGAGAGAAGAGCTGCAAAAG  
AAGAAAAACGTAAGGAACGCGTCTGTGCAGAACACCTGAAGAAGTACAATGATGCTCTCCA  
GATAAATGACACCATCCGAATGGTGGATGCGTACAATCACCTAAATAACTTTTATAAGGAG  
GAGAAAAGTAAGAAGACAGTAAGGAGTGATGATGATGATGATGATGAGCCAGCAGCATCA  
AAACAGGATGAAACAGATGAGTTTCTAATAGGTTTATTTAATGCAAAAAAGAAACAGCTGAA  
AGAGTTGGCTAGAAAGCCAGAATATGAAAATGAGAAGCTAATACAGTTGCGAAATACTTTAA  
TGGAGGAGTTCACGAAGACTGAGGAACCCAGAGGAATTATTTTCACAAAGACTCGGCTAAG  
TGCCTTTGCTCTATTCCAGTGGATTAAGGATAACCCAAAATTTGAAGAAGTGGGAATTAAGG  
CCCATTATCTTATCGGTGCTGGACATAACAGTGAAATGAAACCCATGACTCAGAATGAGCA  
AAGGGAAGTTATTGATAAATCCGAGGTGGAAATGTAAATTTACTTATTGCTACTACTGTAG  
CTGAGGAAGGCCTAGACATCAAAGAGTGTAACATCGTTATTTCGCTACGGCCTCGTCACCAA  
TGAAATTGCTATGGTGCAGGCTCGCGGTGAGCTCGAGCTGATGAGAGCACCTATGCACT  
TGTGGCTTCAGCGGCTCAGGAGCTGTTGAACGTGAAGATGTTAATATTTTCCGTGAGCAA  
ATGATGTATAAGGCCATTCAGCGTGTCCAGAGGATGCCGCAGGAAGAGTATTTAAATAAGA  
TTCAGGATTTCCAGTTGCAAAGTATAGTAGAAAAACAAATGAAGGCAAAGAGAGATCAGCG  
CAAGACACACAAGAAAAATCCTTCACTAATAACATTCTATGCAAAAATTGCCACAAGCTGG  
TATGTTCTGGAGAAGACATACAAGTTATTGAAAACATGCATCATGTGAGTGAAAAAGGAT  
TTCCAAAGTCTTTACCATACAAGAGAAAAATAAGACACTGCAAGATAAGCATGCCGATTACCA

GACAAATGGGGAAATTATATGTAAAGATTGTGGACAAGCTTGGGGAAATATGATGGTTCAC  
CGAGGTCTTGACCTGCCTTGTCTAAAGATTAGAAATTTTGTGGTTGTGTTTGAAGACAAGAA  
ACAACAAAGCAAATTTTAAAGAAATGGGGAGAACTGCCCATCAGATTCCCTGGTTTTGATT  
ATGCAGCTCATTGTCCTTCAAGTGATGAGGATTAA

>otus\_sunia-mds5

ATGGCGAAGGAGTCCCGAGACGAGCGCTTCCTCTACATGATCTCCTGCTTCAGGCCGCGG  
CTGAAGCAGGTCATCCGGGTGCAGCCGGTGCTGGACCAGCTTCCCTCGCTGAGCGCGGA  
GGAGAGGGGAGAAGGTGCGGGCGGCCGCCCTGCAGCGGGGAGAGGTGGAGGGGGCGGA  
GGAGCTGCTGCGGGCCGTGGAGCGGGGCCCGCGGGTGCGGCTGGTTCCACGAGTTC  
CTGCAGGCGCTGGAGCACGGCGGCTGCAGCCTGGCCGCCTGCTACGTGAACCCAGCCT  
CAGCCAGTTGCCCTCGCCGGCCGAGGAAGCCGACCACGACCTCTGCGTGCACTTGGTGC  
AGCTGCTCCACAGCACACTGGTGGATAGAATGCAGACCATGCAGGTAGCCGAGAAGTGCC  
TAGAGATGGGCATCTTCCAGAACGAGGACATGGACCGGATCCCACTGTTACTGACAATC  
GTGGGAACAGAGAGGGTGCAAGGGAGCTATTGAGCAGAATAGTGCAAGAAGAAAGATTGGT  
TCTCTTCTTTTTTATTGCTCTGCGTGAAACCCAACATGGAGGCCTTGCAGATGATTTGAGT  
GGAAATACAGGAGGAACAGAGAATAGCCAAAATGGGATGAAGAACTGTACAAATGAAGAAA  
CAGAAGTTGCAAGCCAAACAGGATATGCTGTAGTAGAGGACTTGAAACATCAAGAAAATGT  
GAATGATAGTTTTAGCAGTGAGAACAGTGTTTTGGAAACATCTGTTGGAAAGAATTCTGTAG  
TTTCAGAGTCAGATGTCTCCTTAGGAGATGGAAGTGTCAGTAACTTGATGAAAACCTGGG  
ACAGAGCTGCACAACCAGCGATACAGATGAAGATGAAGTGGAGAGCAGAGCTTCACCTGA  
GCCAGATCTGATCCTGAGAGATTACCAGATGGAAGTTGCAAAGCCAGCACTGAATGGGGA  
GAATATTATCATATGTCTCCCTACAGGCAGTGGTAAACCAGAGTGGCTGTTTACATTACCA  
AAGATCACTTGGATAAGAAGAAAAGAACATCAGAGCCCCGGAAGTTATAGTACTTGTTAAT  
AAGGTACCACTGGTAGAACAAACATTTACGAAAGGAGTTTACTCCATTCCCTGAAGCGTTGGT  
ATCAGGTTATTGGTTTAAAGTGGTGATTCTCAGCTGAAAATCTCATTTCCTGAAGTTGTCAGA  
AGAAATGATGTCATCATCAGTACAGCACAGATCCTTGAGAATCACTGTTAAATGCAGCCAA  
AGAAGATGAAGAAGGTGTCCACTTATCAGATTTTTCACTTATCATTATCGATGAGTGTATC  
ACACTCAAAGGAAGGTGTCTACAACAATATAATGCGGCGTTACTTAAAGAAAAGATGAA  
GAACAGGAAGCTGGCAAAGAAAACAAACCACTGATCCCGCAGCCTCAGATTCTGGGACT  
TACAGCCTCACCTGGTGTAGGCGGTGCAACATCCTACTCAAAGCTGAAGAACATATTCTG  
AAAATCTGTGCCAATCTTGATGCATGTAGAATCATGACTGTTGAAGAGCATGCCTCCCAGC  
TGAAGAATCAGGTGAAGGAACCATATAAGAAGACTGTGATTGCAGATGACAAGAGAAGGG  
ATCCATTCAGAGAGAGAATTACTGAGATCATGACAGACATTCAAACCTATTGCCAGCTCCAT  
CCAAAATCTGAGTTTGGAACTCAGCCATATGAACAGTGGGTGATCAGAGAAGAGAGGAAA  
GCTGCAAAAGAAGAAAAACGCAAGGAACGTGTCTGTGCAGAGCACTTGAAGAAATACAATG  
ATGCTCTCCAGATAAATGACACCATCCGAATGGTGATGCGTACAATCACCTAAATAACTTT  
TATAAGGAGGAGAAAAGTAAGAAGATGGTAAGGAGTGATGATGACGATGATGATGAACCA  
GCAGTATCGAAACAGGATGAAACAGATGAATTTCTAATAGGTTTATTTTCATGCAAAAAAGAA  
ACAGCTGAAAGAGTTGGCTAGAAAACCAGAATATGAAAATGAGAAGCTAATACAGTTGCGA  
AACACTTTAATGGAGGAGTTCACGAAGACTGAAGAACCTAGAGGAATTATTTTACAAAGA  
CTCGGCTAAGTGCCCTTTGCTCTATTCCAGTGGATTAAGGATAACCCAAAATTTGAAGAAGT  
GGGAATTAAGGCCCATTTATCTTATCGGTGCTGGACATAACAGTGAAATTAACCCCATGACT  
CAGAATGAGCAAAGGGAAGTTATTGATAAATCCGAGGTGAAATGTAAATTTACTTATTGC  
TACTGCTGTAGCTGAGGAAGGCCTAGACATCAAAGAGTGTAACATTGTTATTAGCTATGGC



CTCATCACCAATGAAATTTCTATGGTGCAGGCTCGTGGTCGAGCTCGAGCTGATGAGAGTA  
CCTATGCACTTGTGGCTTCAAGTGGCTCAGGAGCTGTTGAACGTGAAGATGTTAATATTTT  
CCGTGAGAAAATGATGTATAAGGCCATTTCAGCGTGTCCAGAAGATGCCGCAGGAAGAGTA  
TTTAAAGAAGATTGATAATTTCCAGTGGCAAAGCATAGTAGAAAAACAAATGAAGGCAAAGA  
GAGATCAGTGCAAGCCATACAAGAAAAATCCTTCACTAATAACATTCTTATGCAAAAATTGC  
CACAAGCTGATCTGTTCTGGAGAAGACATACAAGTTATTGAAAAGATGCATCATGTCAGTGT  
GAAAAAAGACTTCCAAAGTCTTTACCATACAAGAGAAAAATAAGACACTGCAAGATAAACATG  
CCGATTACCAGACAAATGGAGAAATTATATGTAAAGATTGTGGACAAGCTTGGGGAAATAT  
GATGGTTACCGAGGTCTTGACCTGCCTTGCCTAAAGATTAGAAATTTTGTGGTTGTGTTTG  
AAGACAAGAAAAACAACAAAGCAAATTTTTAAGAAATGGGGAGAACTGCCCATCATGTTCCC  
TAGTTTTGATTATGCATCTCATTGTCCTTCAAGTGATGAAGATTAA

>pandion\_haliaetus-mda5

ATGGCAGAGGAGTCCCGGGACGAGCGCTTCCTCTACATGATCTCCTGCTTCAGGCGGCG  
GCTGAAGCAGTTCATCCGGGTGCAGCCGGTGTGACCGGCTTCCCTCGCTGAGCGCGG  
AGGAGAGGGAGAAAGTGCGGGCGGCCGCCCTGCAGCGGGGCGAGGTGGAGGGGGCGG  
AGGAGCTGCTGCGGGCCGTGGAGCGGGGGCCCCGCGGATGCGGCTGGTTCCACGAGTT  
CCTGCAGGCGCTGGAGCACGGCGGCTGCAGCCTGGCCGCCTGCTACGTGAACCCTAGCC  
TCAGCCAGCTGCCCTCGCCGGCCGAGGAGGCCGACCACGACCTCTGCGTGCACCTTGGTG  
CAGCTGCTTCACAGCACACTGGTGGATAGAATGCAGACCATGCAGGTGGCCGAGAAGTGC  
TTGCAGATGGGCATCTTCCAGGACGAGGACCTGGATCGGATCCACACTGTTACTGACAAT  
CGTGGGAACAGAGATGGTGCAAGGGAGCTACTGAGCAGAATCGTGCAGAAGAAAGATTGG  
TTCTCTCCTTTTTTGATTGCTCTGCGTGAAACCCAAACATGGAGGCCTTGCTGATGATTTAAG  
TGGAACACAGGAGGAACAGAGAATAGACAAAATGGGATGAAGAACAGTACAAACGAAGA  
AACAGAAGTTAGAAGCCCACCAGGATATGCCATAGTGGAGGATCCGAAACAGCAAGAAAA  
CATGAATGAAAGTTTCAGCAGTGAGAACAGTGTTTTGGAAACATCTATTGGAAAGAATTCTG  
TAGTTTCAGAGTCAGATGTCTCCATAGGAGACAGAAGTGTCAGTAACTTGAATGAAAACCT  
AGGACAGAGCTGCAGCTGCACAACCAGTGATTCAGATGAAGATGAAATGGAGAGCAGAGC  
TTCACCTGAGCCAGATCTGATCCTAAGAGATTACCAGATGGAAGTTGCAAAGCCAGCACTG  
AATGGGGAAAATATTATAATATGTCTCCCTACAGGCAGTGGTAAAACCAGAGTGGCTGTTT  
ACATTACCAAAGATCATTTGGATAAGAAGAAAAGAGTATCAGAGCCTGGAAAAGTTATAGTA  
CTTGTTAATAAGGTACCaTTGGTAGAACAGCATTTACGAAAGGAGTTTAATCCATTCCCTGAA  
GCGTTGGTATCAAGTTATTGGTTTAAGTGGCGATTCTCAGCTGAAAATCTCATTTCCCTGAAG  
TTGTCAGAAGAAATGATGTCATCATCAGTACAGCACAGATCCTTGAGAATTCGTTGTTAAAT  
GCAGCCAAAGAAGATGAAGAAGGCGTCCAGTTATCAGATTTTTCACTCATCATTATCGATG  
AGTGTCATCACACTCAAAAGGAAGGTGTCTACAACAATATAATGCGACGTTACTTAAAAGAA  
AAGATGAAGAACCGGAAGCTGGCAAAAGAAAACAAACCACTGATCCCACAGCCTCAGATTC  
TGGGACTTACAGCCTCACCTGGTGTAGGAGGTGCAACATCCTACTCAAAAGCTGAAGAACA  
TATTCTGAAAATCTGTGCCAATCTTGATGCATGTAGAATCATGACTGTTGAAGAGCATGCCT  
CCCAATTGAATAATCAGGTGAAGGAACCATATAAGAAGACTGTGATTGCAGATGACAAAAG  
AAGGGATCCATTTAGAGAGAGAATTACTGAGATCATGACAGACATTCAAACTATTGCCAG  
CTCCATCCAAAATCTGAGTTTGAACTCAGCCATATGAACAATGGGTGATTAGAGAAGAGA  
GAAGAGCTGCAAAAGAAGAAAAACGCAAGGAACGTGTGTGTGCAGAACACTTGAAGAAAT  
ACAATGATGCTCTCCAGATAAATGACACCATCCGAATGGTGGATGCGTACAATCACCTAAA  
TAACTTTTATAAGGAGGAGAGAAAAGTAAGAAGACAGTAAGGAGTGATGATGATGATGATGAT

GATGAACCAACAGTATCAAAACAGGATGAAACAGATGAATTTCTAATAGCTTTATTTTCATGC  
AAAAAAGAAACAGCTGAAAGAGTTGGCTAGAAAGCCAGAATATGAAAATGAGAAGCTAATA  
CAGTTGCGAAACACTTTAATGGAGGAGTTCACGAAGACTGAGGAACCTAGAGGAATTATTT  
TCACAAAGACTCGGTAAAGTGCCTTTGCTCTATTCCAGTGGATTAAGGATAACCCAAAATTT  
GAAGAAGTGGGAATTAAGGCCATTATCTTATCGGTGCTGGACATAACAGTGAAATTAAC  
CCATGACTCAGAATGAGCAAAGGGAAGTTATTGATAAATCCGAAGTGGAAATGTAAATTTA  
CTTATTGCTACTACTGTAGCTGAGGAAGGCCTAGACATCAAAGAATGTAACATCGTTATTG  
CTATGGCCTCGTCACCAATGAAATTGCTATGGTGCAGGCTCGCGGTCGAGCTCGAGCTGA  
TGACAGCACCTATGCACCTTGTGGCTTCGAGTGGCTCAGGAGCTGTTGAACGTGAAGATGTT  
AATATTTTCCGTGAGAAAATGATGTATAAGGCCATTCAGCGTGTCCAAAAGATGCCGCAGA  
AAGACTATTTAAATAAGATTCAGAATTTCCAGTTGCAAAGTATAGTGGAACAAATGAAG  
GCAAAGAGAGATCAGCGCAAGACAAACAACAAAATCCTTCACTAATAACATTCCTATGCAA  
AAATTGCCACAAGCTGATATGTTCTGGAGAAGACATACAAGTTATTGAAAACATGCATCATG  
TCAGTGTGAAAAAAGATTTCCAAAGTCTTACCATACAAGAGAAAAATAAGACACTGCAAGAT  
AAGCATGCCGATTACCAGATAAATGGGGAAATTATATGTAAAGATTGTGGACAAGCTTGGG  
GAAATATGATGGTTCACCGAGGTCTTGACCTGCCATGTCTAAAGATTAGAAATTTTGTGCTT  
GTGTTTGAAGACAAGAAAACAACAAAGCAAATGTTTAAAGAAATGGGGAGAACTGCCTGTCA  
GGTCCCTAGTTTTGATTATGCAGCTCATTGTCTTCAAGTGATGAAGATTAA

>paradisaea\_rubra-md5

ATGGCAGACAGCACCCGGGACGAGCTGTTCTGTACATCATCTCCTGCTTCAGGCCGCGG  
CTGAAGCAGTGGATCCAGGTGCAGCCCGTGCTGGACCTGCTCCCCTCGCTGAGCGCGGA  
GGACAGGGAGAGGGTGCGTGCGGCCGCCCTGCAGCGGGGCCAGGCGGCGGGGGCGGA  
GGAGCTGCTGCGGGCCGTGGAGCGGGGGCCCCGCGGCTGCGGCTGGATCCGCGAGTTC  
CTGCAGGCGCTGGAGCACGGCGGCTGCAGCCTGGCCGCCTGCTACGCCAACCCAGCCT  
GAGCCAGCTGCCCTCGCCGGCAGAGGAGGCCGAGCACGACCTCTGCGTGCACCTGGTGC  
AGCTGCTGCACGGCACGCTGGTGGACAGGATGCGGACCGTGCAGGTGGCCGAGAAGTGC  
CTGGAGATGGGCATCTTCCGGGACGAGGACATGGATCAGATCCAGACTGTTGCTGACAAT  
CGTGGGAACAGAGATGGTGCAAGGGAGCTACTGAGCAGAATAGTGCAGAAGAAAGATTGG  
TTCTCTTCTTTTTTGAATTGCTCTCCGTGAAACTCAACATGAAGACCTTGCAGATGATTTAAG  
CGGAAATACAGGAGGAACAGAGAATAAACAAAATGGGATGGAGAAGAGTACCAACAAAGA  
AGCAGAAGTTACAAGCCAACCAGGATACATCACAGCGGAGAATTTGAAACAGGAAGAAAAAT  
GTGGATGATAGTTTCAGCAGTGAGAACAGTGTATTGAAACATCCATAGAAAAGAATTCTG  
TGGTGTGAGAGTCAGATGTCTCCATAGGAGATGGAAGTGTGAGTAACTTGAATGAAAACCT  
GGGAGAGAGCTGCACAACCAAGTGAATCAGATGAAGGGGAGAGGAGAGTCTCACCTGAGC  
CAGATCTGACCCTGAGAAATTACCAGATGGAAGTTGCAAAGCCAGCACTGAATGGGGAGA  
ATGTTATAATATGTCTCCCTACAGGCAGTGGTAAAACCAAGAGTGGCTGTTTACATTACCAAA  
GATCACTTGGATAAGAAGAGAAGAGCATCAGAGCCTGGAAAAGTCATAGTACTTGTTAATA  
AGGTGCCATTGGTAGAACAGCATTTACAAACAGAGTTCAGTCCATTCTGAAGCGTTGGTA  
TCAGGTTATTGGTTTAAAGTGGTGATTCTCAGCTGAAAATCTCATTTCTGAAGTTGTCAGAA  
GAAATGATGTCATCATCAGTACAGCACAGATCCTTGAGAATTCAGTGTAAATGCATCCAAG  
GAAGATGAAGAGGGTGTCCACTTATCAGATTTTTCCCTCATCATTATCGATGAGTGTATCA  
CACTCAAAAGGAAGGTGTCTACAACAATATAATGCGACGTTACTTAAAAGAAAAGATGAAGA  
ACAGGAAGCTGGCAAAGAAAACAAACCACAGATCCCACAGCCTCAGATTCTGGGACTGA  
CAGCCTCACCTGGTGTAGGAGGTGCAACATCCTACTCAAAGCTGAGGAGCATATTCTGAA

AATCTGTGCCAATCTTGATGCATGTAGAATTATGACTGTTGAAGAGCATGTCTCCCAGCTAA  
AAAATCAGGTAAAGGAACCGTCTAAGAAGACTGTGATTGCAGATGACAAAAAAGGGATCC  
ATTTAAAGAGAGAATTACTGAGATCATGACAGAAATACAAAATTATTGCCAGTTGCATCCAA  
AATCTGAGTTTGGAACCTCAGACATATGAACAGTGGGTGATCAGAGAAGAGAAAAGAGCTGC  
AAAAGAAGAAAAACGCAGGGAACGTGTCTGTGCAGAACTTGAAGAAATACAATGATGCT  
CTCCAGATAAATGACACCATCCGAATGGTGGATGCCTACAATCACCTAAATAACTTTTATAA  
AGAGGAGAAAAAGTAAGAAGACAGTAAGGAGTGATGATGATGATGATGATGAACCAGCAGT  
ATCAAAACAGGATGAAACAGATGAATTTCTAATAGGTTTATTTTCATGCAAAAAAGAAACAGC  
TGAAAGAGTTGACGGGAAAGCCAGAAAATGAAAATGAGAAGCTAATAAAGTTGAGAAATAC  
TTAATGGAGGAGTTCACAAAGACTGAGGAACCTCGAGGAATTATTTTCACAAAGACTCGT  
CTAAGTGCCTTTGCTCTATTCCAGTGGATTAAGGACAACCCGAAATTTGAAGAAGTGGGAA  
TTAGGGCCCCATTATCTTATTGGCTCTGGACATAACAGTGAGATGAAGCCCATGACTCAGAA  
TGAGCAAAGGGAAGTTATTGATAAATTTGACGTGGAAATGTAAATTTACTAATTGCTACTA  
CCGTAGCTGAGGAAGGCCTGGACATCAAAGAGTGTAACATTGTTATTGCTATGGCCTTGT  
CACCAATGAAATTGCTATGCTGCAGGCTCGTGGTCGAGCTCGAGCTGATGAAAGCACCTAT  
GCTCTTGTGGCTTCAAGTGGCTCAGGGGCTGTTGAACGTGAAGATGTTAATATTTTTCTGTG  
AGAAAATGATGTATAAGGCCATTACGCGTGTCCAGAAGATGCCACAGGAAGAGTACTTAA  
CAAGATTCAGAGTTTCCAGTTGCAAAGTATAGTGGAAGCAAATGAAGGCAAAGAGAGAT  
CAGCGCAAGACATACAAGAAAAATCCTTCACTAATAAAATTCTTATGCAAACTTGCTACAA  
GCCAGTATGTTCTGGAGAAGACATACAAGTTATTGAAGACATGCATCATGTCAAGTGTGAGA  
AAAGATTTCCAAAGTCTTTATCAAACAAGAGAAAATAAACTCTGCAAGATAAGCGTGCTGA  
TTACCAGACCAATGGGGAAATTATATGTAAACACTGTGGACAAGCTTGGGGAAATATGATG  
GTACACCGAGGTCTTGACCTGCCTTGTCTAAAGATTAGAAATTTGTGGTTGTGTTTGCAGA  
CAAGAAAACAACAAAGCAAATTTTTAAGAAATGGGGAGAACTGCCCATCAGGTTTCCTGGT  
TTTGATTATGCAGCTCATTGTCCTTCAAGTGAGGAAGATTAA

>parotia\_lawesii-mda5

ATGGCAGACAGCACCCGGGACGAGCTGTTCTGTACATCATCTCCTGCTTCAGGCCGCGG  
CTGAAGCAGTGGATCCAGGTGCAGCCCGTGCTGGACCGGCTCCCCTCGCTGAGCGCGGA  
GGACAGGGAGAGGGTGCGTGCGGCCGCCCTGCAGCGGGGCCAGGCGGCGGGGGCGGA  
GGAGCTGCTGCGGGCCGTGGAGCGGGGGCCCCGCGGCTGCGGCTGGATCCGCGAGTTC  
CTGCAGGCGCTGGAGCACGGCGGCTGCAGCCTGGCCGCCTGCTACGCCAACCCAGCCT  
GAGCCAGCTGCCCTCGCCGGCAGAGGAGGCCGAGCACGACCTCTGCGTGCACCTGGTGC  
AGCTGCTCCACGGCACGCTGGTGGACAGGATGCGGACCGTGCAAGTGGCCGAGAAGTGC  
CTGGAGATGGGCATCTTCCGGGACGAGGACATGGATCAGATCCAGACTGTTGCTGACAA  
CGTGGGAACAGAGATGGTGCAGAGGGAGCTACTGAGCAGAATAGTGCAAGAGAAAGATTG  
GTTCTCTTCTTTTTTATTGCTCTCCGTGAACTCAACATGAAGACCTTGCAAGATGATTTAA  
GCGGAAATACAGGAGGAACAGAGAATAAACAAAATGGGATGGAGAAGAGTACAAACAAAG  
CAGAAGTTACAAGCCAACCAGGATACATCACAGCGGAGAATTTGAAACAGGAAGAAAATGT  
GGATGATAGTTTCAGCAGTGAGAACAGTGTATTGGAAACATCCATAGAAAAGAATTCTGTG  
GTGTCAGAGTCAGATGTCTCCATAGGAGATGGAAGTGTCAGTAACTTGAATGAAAACCTGG  
GACAGAGCTGCACAACCAGTGATTCAGATGAAGGGGAGAGGAGAGCCTCACCTGAGCCA  
GATCTGACCCTGAGAGATTACCAGATGGAAGTTGCAAAGCCAGCACTGAATGGGGAGAAT  
GTTATAATATGTCTCCCTACAGGCAGTGGTAAAACCAGAGTGGCTGTTTACATTACCAAAGA  
TCACTTGGATAAGAAGAAAAGAGCATCAGAGCCTGGAAAAGTCATAGTACTTGTTAATAAG

GTGCCATTGGTAGAACAGCATTTACAAACAGAGTTTAGTCCATTCCCTGAAGCGTTGGTATC  
AGGTTATTGGTTTAAGTGGTGATTCTCAGCTGAAAATCTCATTTCCCTGAAGTTGTCAGAAGA  
AATGATGTCATCATCAGTACAGCACAGATCCTTGAGAATTCAGTGTAAATGCATCCAAGGA  
AGATGAAGAAGGTGTCCACTTATCAGATTTTTCCCTCATCATTATCGATGAGTGTGCATCACA  
CTCAAAGGAAGGTGTCTACAACAATATAATGCGACGTTACTTAAAAGAAAAGATGAAGAAC  
AGGAAGCTGGCAAAAGAAAACAAACCACAGATCCCGCAGCCTCAGATTCTGGGACTGACA  
GCCTCACCTGGTGTAGGAGGTGCAACATCCTACTCAAAAGCTGAGGAGCATATTCTGAAAA  
TCTGTGCCAATCTTGATGCATGTAGAATTATGACTGTTGAAGAGCATGTCTCCCAGCTAAAA  
AATCAGGTAAAGGAACCGTCTAAGAAGACTGTGATTGCAGATGACAAAAAAGGGATCCAT  
TTAAAGAGAGAATTACTGAGATCATGACAGAAATACAAAATTATTGCCAGTTGCATCCAAAA  
TCTGAGTTTGGAACCTCAGACATATGAACAGTGGGTGATCAGAGAAGAGAAAAAGAGCTGCAA  
AAGAAGAAAAACGCAGGGAACGTGTCTGTGCAGAACACTTGAAGAAATACAATGATGCTCT  
CCAGATAAATGACACCATCCGAATGGTGGATGCCTACAATCACCTAAATAACTTTTATAAAG  
AGGAGAAAAGTAAGAAGACAGTAAGGAGTGATGATGATGATGATGAACCAGCAGTATC  
AAACAGGATGAAACAGATGAATTTCTAATAGGTTTATTTTCATGCAAAAAAGAAACAGCTGA  
AAGAGTTGACGGGAAAGCCAGAAAATGAAAATGAGAAGCTAATAAAGTTGAGAAATACTTT  
AATGGAGGAGTTCACAAAGACTGAGGAACCTCGAGGAATTATTTTCACAAAGACTCGTCTA  
AGTGCCCTTTGCTCTATTCCAGTGGATTAAGGACAACCCGAAATTTGAAGAAGTGGAATTA  
GGGCCATTATCTTATCGGCTCTGGACATAACAGTGAGATGAAGCCCATGACTCAGAATGA  
GCAAAGGGAAGTTATTGATAAATTTGACGTGGAAATGTAAATTTACTAATTGCTACTACCG  
TAGCTGAGGAAGGCCTGGACATCAAAGAGTGTAACATTGTTATTCGCTATGGCCTTGTAC  
CAACGAAATTGCTATGCTGCAGGCTCGTGGTTCGAGCTCGAGCTGATGAAAGCACCTATGC  
TCTTGTGGCTTCAAGTGGCTCAGGGGCTGTTGAACGTGAAGATGTTAATTTTTTCGTGAG  
AAAATGATGTATAAGGCCATTTCAGCGTGTCCAGAAGATGCCACAGGAAGAGTATTTAAACA  
AGATTCAGAGTTTCCAGTTGCAAAGTATAGTGGAAGCAAATGAAGGCAAAGAGAGATCA  
GCGCAAGACATACAAGAAAAATCCTTCACTAATAAAATTCTTATGCAAACTTGCTACAAGC  
CGGTATGTTCTGGAGAAGACATACAAGTTATTGAAGACATGCATCATGTCAGTGTGAGAAA  
AGATTTCCAAAGTCTTTATCAAACAAGAGAAAATAAACTCTGCAAGATAAGCGTGCTGATT  
ACCAGACCAATGGGGAAATTATATGTAAACACTGTGGACAAGCTTGGGGAAATATGATGGT  
ACACCGAGGTCTTGACCTGCCTTGTCTAAAGATTAGAAATTTTGTGGTTCGTGTTTGCAGAC  
AAGAAAACAACAAAGCAAATTTTTAAGAAATGGGGGAGAACTGCCCATCAGGTTTCCTGGTTT  
TGATTATGCAGCTCATTGTCCTTCAAGTGATGAAGATTAA

>parus\_major-mda5

ATGGCAGAGGGCACCCGGGACGAGCGGTTCTCTACATGATCTCCTGCTTCAGGCCGCG  
GCTGAAGCAGTTCATCCAGGTGCAGCCCGTGCTGGACCGGCTCCCCTCGCTGAGCGCGG  
AGGACAGGGACAGGGTGCGGGCGGCCGCCCTGCAGCGCGGCGCGGCGGGCGCGCGG  
AGGAGCTGCTGCGGGCCGTGGAGCGCGGGCCCCGCGGCTGCGGCTGGATCCGCGAGTT  
CCTGCAGGCGCTGGAGCACGGTGGCTGCAGCCTGGCAGCCTGCTACGCCAACCCAGCC  
TGAGCCAGCTGCCATCGGCGGCAGAGGAGGCCGAGCACGACCTCTGCGTGCAGCTGGTG  
CAGCTGCTGCACGGCACGCTGGTGGACAGGATGCGCACCGTGCAAGTGGCCGCCAGGT  
GCCTGGAGATGGGCATCTTCCAAGAGGAGGACATGGATCGGATCCAGACTGCTACTGATA  
ATCGTGGAACAGAGATGGTGCAAGGGAGCTACTGAGCAGAATAGTCCAGAAGAAAGATT  
GGTTCTCTCTTTTTTGGTTGCTCTCCGTGAAACCCAACATGAGGACCTTGCAAGATGATTTA  
AGTGGAATACAGGAGAGAATAAACAAAATGGGACGGAGCAGACTACAAATGAAGAACT

GAAGTTAGAAGCCAACCAGGATATGACATAGAGGAGAATTTGAAACAGGAAGAAAATGTGG  
ATGATAGTTTCAGCAGTGAGAACAGTGTGTTGGAAACATCCATACAAGAGAATTCTGTGGT  
GTCAGACTCAGATGTCTCCATAGGAGATGGAAGCATCAGTAACTTAAATGAAAATCTGGGA  
CAGAGCTTCACAGCCACTGATTCAGATGAAGTGGAGAGGAGAGCCTCACCTCAGCCAGAT  
CTGACTCTGAGAGATTACCAGATGGAAGTTGCAAAGCCAGCACTGAATGGGGAGAATATTA  
TAATATGTCTCCCTACGGGCAGTGGTAAAACCAGAGTGGCTGTTTACATTACCAAAGATCA  
CTTGGATAAGAAGAAAAGGGCATCAGAGCCTGGAAAAGTCATAGTACTTGTTAATAAGGTT  
CCATTGGTAGAACAGCATTTACAAACAGAGTTTAGTCCATTCTGAAGCGCTGGTATCAGG  
TTATTGGTTTAAGTGGTGATTCTCAGCTGAAAATCTCATTTCTGAAGTTGTCAGAAGAAAT  
GATGTCATCATCAGTACAGCACAGATCCTTGAGAATTCAGTGTAAATGCATCCAAAGAAGA  
TGAAGAATATGTCCACTTATCAGATTTTTCTCTCATCATTATTGATGAATGTCATCACACTCA  
AAAGGAAGGTGTCTACAACAATATAATGCGACGTTACTTAAAAGAAAAGATGAAGAACAGG  
AAGCTGGCAAAAAGAAAACAAACCACTGATCCACAGCCTCAGATTCTGGGACTTACAGCCT  
CTCCTGGTGTAGGAGGTGCAACATCCTACTCAAAGCTGAAGAGCATATTCTGAAAATCTG  
TGCCAATCTTGATGCTTGTAGAATTATGACTGTTGAAGAGCATGCCTCCCAGCTGAAGAAT  
CAGGTGAAGGAACCAACTAAGAAGACTGTGATTGCAGATGACAAAAAAGGGATCCATTTA  
AAGAGAGAATTACTGAGATCATGACAGAAATACAAAACCTATTGCCAGCTGCATCCAAAGTCT  
GAGTTTGGAACTCAGACGTATGAACAGTGGGTGATCAGAGAAGAGAGAAGAGCTGCAAAA  
GAAGAAAAACGCAGGGAACGTGTCTGTGCAGAACACTTGAAGAAATACAATGATGCTCTCC  
AGATAAATGACACCATCCGAATGGTGGATGCCTACAATCACCTAGATAACTTTTATAAAGAG  
GAGAAAAGTAAGAAGACAGTAAGGAGTGATGATGATGATGATGATGATGAACCAGCAGTAT  
CAAAACAGGATGAAACAGATGAATTTCTAATAGGTTTATTTTCATGCAAAAAAGAAACAGCTG  
AAAGAGTTGACTGGAAATCCAGAAAATGAAAATGAGAAGCTAATAAAGTTGAGAAATACTTT  
AATGGAGGAGTTCACAAAGACTGAGGAACCTCGAGGAATCATTTTCACAAAGACTCGTCTA  
AGTGCCCTTTGCTCTATTCCAGTGGATTAAGGACAACCCAAAATTTGAAGAAGTGGGAATTA  
GGGCCCATTTATCTTATCGGCTCTGGACATAAGAGTGAAATCAAGCCCATGACTCAGAATGA  
GCAAAGGGAAGTTATTGATAAATTTGATGTGGAAATGTAAATTTACTAATTGCTACTACTG  
TAGCTGAGGAAGGACTGGACATCAAAGAGTGTAACATCGTTATTCGCTATGGCCTTGTCAC  
CAATGAAATTGCTATGGTGCAGGCTCGTGGTAGAGCTCGAGCTGATGAAAGCACTTATGCT  
CTTGTGGCTTCCAGTGGCTCAGGGGCTGTTGAACGTGAAGATGTTAATATTTTTCGTGAGA  
AAATGATGTATAAGGCCATTCAGCGTGTCCAGAAGATGCCACAGGAAGAGTATTTAAATAA  
GATTCACAGTTTCCAGTTGCAAAGTATAGTGGAAAAACAAATGAAGGCAAAGAGAGATCAG  
CGCAAGACATGCAAGAAAAATCCTTCACTAATAAAATTCTTATGCAAAAATTGCAACAAGCT  
GATATGTTCTGGAGAAGACATACAAGTTATTGAAGAAATGCATCATGTGAGTGTGAAAAAG  
ATTTCTAAGTCTTTATCATACAAGAGAAAATAAAACACTGCAAGATAAGAAATGCCGATTAC  
CAGACAAATGGAGAAATTGTATGCAAAGACTGTGGACAGGCTTGGGGAAATATGATGGTTC  
ACCGAGGTCTTGACCTGCCTTGTCTAAAGATTAGAAATTTTGTGGTTGTGTTTGCAGACAAG  
AAAACAACAAAGCAAATTTTTAAGAAATGGGGAGAACTGCCCATCAGGTTTCCTAGTTTTGA  
TTATGCAGCTCATTGTCCTTCAAGTGATGAAGATTAA

>passer\_montanus-md5

ATGGCAGAGGGCACCCGGGACGAGCGGTTCTCTACATGCTCTCCTGCTTCAGGCCGCG  
GCTGAAGCAGTTCATCCAGGTGCAGCCCGTGCTGGACCGGCTCCCTCGCTGAGCGCGG  
ACGACAGGGACAGGGTGCCTGCGGCCGCCGTGGAGCGGGGCGCGGCGGGCGCGG  
AGGAGCTGCTGCGGGCCGTGGAGCGGGGGCCCCGCGGCTGCGGCTGGATCCACGAGTT

CCTGCAGGCGCTGGAGCACGGCGGCTGCAGCCTGGCCGCCTGCTACGCCAACCCCAGC  
CTGAGCCAGCTGCCCTCGCCGGCAGAGGAGGCCGAGCACGACCTCTGCGTGACCTGGT  
GCAGCTGCTGCACGGCACGCTGGTGGACAGGATGCGCACCGTGACAGGTGGCCCACAAGT  
GCCTGGAGATGGGAATCTTCCAGGACGAGGACGTGGATCGGATCCAGGCTGTTACTGACA  
ATCGTGGGAACAGAGATGGTGCAAGGGAGCTACTGAGCAGAATAGTCCAGAAGAAAAGATT  
GGTTCTCTTCTTTTTTGGTTGCTCTCCGTGAAACCCAACATGAAGACCTTGCAGATGATTTA  
AGTGGAAATACAGGAGAGAATAAACAAAATGGGATGGAGCAGACTACGAACGAAGAAACA  
GAAGTTACCAGCCAACCAGGATACATCATAGAGGAGAATTTGAAACAGGAAGAAAATGTTG  
ATGATAGTTTCAGCAGTGAGAACAGTCTGTTGGAAACATCCACGGAAAAGAATTCTGTGAT  
GTCAGAGTCAGATGTCTCCATAGGAGATGGGAGTGTCACTAACTTGAATGAAAACCTGGAA  
CAGAGTTGCACAACCAGTGATTGAGATGAAGTGGAGAGGAGAGCCTCACCTGAGCCAGAT  
CTGACCCTGAGAGATTACCAGATGGAAGTTGCAAAGCCAGCATTGAATGGGGAGAATATTA  
TCATATGTCTCCCTACAGGCAGTGGTAAAACCAGAGTGGCTGTTTACATTACCAAAGATCA  
CTTGGATAAGAAGAAAAGAGCATCAGAGCCTGGAAAAGTCATAGTACTTGTTAATAAGGTT  
CCATTGGTAGAACAGCATTTTAAAAACAGAGTTTAGTCCATTCTGAAGCGTTGGTATCAGGT  
TATTGGTTTAAAGTGGTGATTCTCAGCTGAAAATCTCATTTCCTGAAGTTGTCAGAAGAAACG  
ATGTCATCATCAGTACAGCACAGATCCTTGAGAATTCAGTGTAAATGCATCCAAGGAAGAT  
GAAGAAAGTGTCCACTTATCAGATTTTTCCCTCATCATCATCGATGAGTGTATCACACTCA  
AAAGGAAGGTGTCTACAATAATATAATGAGACGTTACTTAAAAGAAAAGATGAAGAACAGGA  
AACTGGCAAAAGAAAACAAACCACTGATCCCACAGCCTCAGATTCTGGGACTTACAGCCTC  
ACCTGGTGTAGGAGGTGCAACATCCTACTCAAAGCTGAAGAGCATATTTTGAAAATCTGT  
GCCAATCTTGATGCATGTAGGATTATGACTGTTGAAGAGCATGCCTCCCAGCTAAAGAATC  
AGGTGAAAGAACCATCTAAGAAGACTGTGATTGCAGATGACAAAAAAGGGATCCATTTAA  
AGAGAGAATTATTGAGATCATGACAGAAATACAAAATCTATTGCCAGCTGCATCCGAGCTCT  
GAGTTTGGAACCTCAGACATATGAACAGTGGGTGATCAGAGAAGAGAAAAGAGCTGCAAAA  
GAAGAAAAACGCAGGGAACGTGTCTGTGCAGAGCACTTGAAGAAATACAACGATGCTCTC  
CAGATAAATGACACCATCCGAATGGTGGATGCCTACAATCACCTAAATACTTCTATAAAGA  
GGAGAAAAGTAAGAAGACAGTAAGGAGTGATGATGATGATGAACCAGCAGTATCAAAA  
CAGGATGAAACAGATGAATTTCTAATAGGTTTATTTTCATGCAAAAAAGAAACAGCTGAAAGA  
GTTGACTAAAAAGCCAGAAAATGAAAATGAGAAGCTAACGGAGTTGAGAAATACTTTAATG  
GAGGAGTTCACGAAGACTGGGGAACCTCGAGGAATCATTTTCACAAAGACTCGTCTAAGTG  
CCTGTGCTCTTTTCCAGTGGATTAAGGACAACCCAAAATTTGAAGAAGTGGGAATTAGGGC  
CCATTATCTTATCGGTGCTGGACATAAGAGTGAAATGAAGCCCATGACTCAGAATGAGCAA  
AGGGACGTTATTGATAAATTTTCGATGTGGAAATATAAATTTACTAATTGCAACTACTGTAGCT  
GAGGAAGGCCTGGACATCAAAGAGTGTAACATTGTTATTTCGCTATGCCCTCGTCACCAATG  
AAATTGCTATGGTGCAGGCTCGTGGTAGAGCTCGAGCTGATGAAAGCACCTATGCTCTTGT  
GGCTTCAAGTGGCTCAGGGGCTGTTGAACGTGAAAGTGTTAATATTTTTCGTGAGAAAATG  
ATGTATAAAGCCATTCAGCGTGTCCAGAAGATGCCACAGGAAGAGTATTTAAAAAAGATTC  
AGACTTTCCAGTTGCAAAGTATAGTGGAACAAATGAAGGTGATGAGAGATCAGCGCAA  
GACATACAAGAAAAATCCTTCACTAATAAAATCTTATGCAAAAATTGCTCCAAGCTGATATG  
TTCTGGAGAAGACATACAAGTTATTGAAGACATGCATCATGTCAGTGTGAAAAAAGATTTCC  
AAAGTCTTTATCATACAAGAGAAAATAAAGCACTGCAAGATAAGCGTGCTGATTACCAGACA  
AATGGGGAAATTATATGCAAAGACTGTGGACAAGCTTGGGGAAATATGATGGTTCACCGAG  
GTCTTGACCTGCCTTGTCTAAAAATCAGAAATTTTGTGGTTGTGTTAGCAGACAAGAAAACA

ACAAACAATATTTTTAAGAAATGGGGAGACCTGCCCATCAGGTTTCCTAGTTTTGATTATGC  
AGCTCATTGTCCTTCAAGTGATGAAGATTAA

>patagioenas\_fasciata-mds5

ATGGGAGAAGAGTCCCGAGACGAACGCTTCCTGTACATGATCTCCTGCTTCAGGCCGCGG  
CTGAAGCAGTTCATCCGGGTGGAGCCGGTGCTGGACCGGCTTCCCTCGCTGAGCGCGGA  
GGACAGGGAGAAGGTGCGGGGCGGCCGCCCGTCAGCGGGGCGAGGTGGAGGGGGCGGA  
GGAGCTGCTGCGGGGCCGTGGAGCGGGGACCCCGCGGGTGCGGCTGGTTCCACGAGTTC  
CTGCAGGCGCTGGAGCACAGTGGCTGCAGCCTGGCTGCCTGCTACGTGAACCCAGCCT  
CAGCCAGCTGCCATCGCCGGCCGAGGAGGCCGACCATGACCTCTGCGTGCACTTGGTGC  
AGCTGCTCCACAGCACGCTGGTGGATAGAATGCAGACCGTGACGGTGGCCGAGAAGTGC  
CTGCAGATGGGCATCTTCCAAGAGGAGGACCTGGATCGGATCCACACTGTTACTGACAAT  
CATGGGAACAGAGATGGTGCAGGGAGCTACTGAGCAGAATAGTGCAGAAGAAAGATTGG  
TTCTCTCCTTTTTTATTGCTCTGCGTGAAACCCAACATGGAGACCTTGAGATGATCTAAG  
TGGAATAGAGGAGGAACAGAGAATGGACAGAATGGGATGAAGAACAGTGCAATGAAGT  
AAGAGAAGTTATAAGCCAACCAGGATATGACATTGTGGAGGATTTGAAACAGCAAGAAAAT  
GTGAATGATAGTTTCAGCAGTGAGAACAGTGTACTGGAACATCTACTGGAAGGAATTCTG  
TAGTTTCTGAGTCAGATGTCTCCATAGGAGATGGAAGTGTGAGTAAGTTGAAAGAAAATCT  
GGGACACAGCTGCACAACCAGTGATTGAGATGAAGGTGAAATGGAGAGCAGATCTTCACC  
TGAGCCAGATCTGATCCTGAGAGATTACCAGATGGAAGTTGCAAACACAGCACTGAATGGA  
GAGAATATTATAATATGTCTCCCTACAGGCAGTGGTAAAACCAGAGTGGCTGTTTACATTAC  
CAAAGATCACTTGGATAAGAAGAAAAAGCATCAGAGCCTGGAAAAGTTATAGTACTTGTTA  
ATAAGGTACCATTGGTAGAACAAACATTTACGAAAGGAGTTTAATCCATTCCCTGAAGCATTGG  
TATCGGGTTATTGGTTTAAGTGGTGATTCTCAGCTGAAAATCTCATTTCCTGAAGTTGTCAG  
AAGAAATGATGTCATCATCAGTACAGCACAGATCCTTGAGAATTCAGTGTAGATGCAGCC  
AAAGAAGATGAAGAAGGTGTCCACTTATCAGATTTTTCACTCATCATTATCGATGAATGTCA  
TCACACTCAGAAGGAAGGTGTCTACAATAATATAATGCGACGTTACTTAAAAGAAAAGATGA  
AGAACAGGAAGCTAGCAAAAGAAAACAAACCACTGACCCACAGCCTCAGATTCTGGGAC  
TTACAGCCTCACCTGGTGTAGGAGGTGCAACGTCCAACCTCAAAGGCTGAAGAACATATTCT  
GAAAATCTGTGCTAATCTTGATGCATGTAGAATCATGACTGTTGAAGAGCATGCCTCCCAAT  
TGAAGAATCAAGTGAAGGAACCATATAAGAAGACTGTGATTGCAGATGACAAAAGAAGGGA  
TCCATTTAGAGAGAGAATTACTGAGATCATGACCGATATTCAAAACTATTGCCAGCTCCATC  
CAAAATCTGAGTTTGGAACTCAGCCATATGAACAGTGGGTGATTAGAGAAGAGAAAAAAGC  
TGCAAAAGAAGAAAAACGCAAGGAACGTGTCTGTGCAGAACACCTGAAGAAATATAACGAT  
GCTCTCCAGATAAATGACACCATCCGAATGGTGGATGCGTACAATCACCTAAAGAACTTTT  
ATAAGGAGGAGAGAAAAGTAAGAAGACAGTAAGGAATGATGATGATGATGATGGTGTATGATGA  
ACCAGCAGTATCAAAACAGGATGAAACAGATGAATTTCTAATAGGTTTATTTTCATGCAAAAA  
AGAAGCAGCTGAAAGAGTTGGCTAGAAAGCCAGAATATGAAAATGAGAAGCTAATACAGTT  
GCGAAACACTTTAATGGAGGAGTTCACGAAGACTGAGGAACCTAGAGGAATTATTTTCACA  
AAGACTCGGCTAAGTGCCCTTTGCTCTATTCCAGTGGATTAAGGATAACCCAAAATTTGAAGA  
AGTGGGAATTAAGGCCATTATCTTATTGGTGTGCTGGACATAACAGTGAATGAAACCCATG  
ACTCAGAATGAGCAAAGGGAAGTTATTGATAAATTCCGAGGTGGTAATGTAAATTTACTTAT  
TGCTACTACTGTAGCTGAAGAAGGCCTAGACATCAAAGAATGTAAACATCGTTATTCGCTATG  
GCCTCGTCACCAATGAAATTGCTATGGTGCAGGCTCGTGGTGCAGCTCGTGCTGATGAGA  
GCACCTATGCACTTGTGGTGTCAAGTGGCTCAGGAGCTGTTGAACGTGAAGATGTTAATAT

TTTCCGTGAGGAAATGATGTATAAGGCCATTACAGCGTGTCCAGAAGATGCCACGGGAAGA  
GTATTTAAATAAGATTTCAGGATTTCCAGTTGCAAAGTATAGTGGAAGAAAAAATGAAGACAA  
AGAGAGATCAGTGCAAGACATGCAAGAAAAATCCTTCACTAATAACATTCCTATGCAAAAAAT  
TGCCACAAGCTGATATGTTCTGGAGAAGACATACAAGTTATTGGAAACATGCATCATGTCA  
GTGTAAAAAAGATTTCCAAAGTCTTTACCATATAAGAGAAAAATAAGACACTGCAAGATAAG  
CATGCTGATTACCAGACAAATGGGGAAATTATATGTAAAGACTGTGGACAAGCTTGGGGAA  
ACATGATGGTTCACAGAGGTCTTGACCTGCCTTGTCTTAAAATTAGAAATTTTGTGGTTGTG  
TTTGAAGACAAGAAAACACCAAAGCAAATGTTTAAGAAATGGGGAGAACTGCCCATCAGGT  
TCCCTAATTTTAATTATGCAGCTCATTGCCCTTCAAGTGATGAAGATTAA

>pelecanoides\_urinatrix-mda5

ATGGCAGAGGAGTTCCAAGACGAGCGCTTCCTCTACATGATCTCCTGCTTCAGGCCGCGG  
CTGAAGCAGGTCATCCGGGTGCAGCCGGTGCTGGACCGGCTTCCCTCGCTGAGCGCAGG  
GGAGAAGGAGAAGGTGCGGGCGGCCGCCCTGCAGCGGGGCGAGGTGGAGGGAGCGGA  
GGAGCTGCTGCGGGCCGTGGAGCGGGGGCCCCGCGGGTGCGGCTGTTCAATGAATTC  
CTGCAGGCGCTCGAGAACGGCGGCTGCAGCCTGGCTACCTGCTACGTGAACCCAGCCT  
CAGCCAGCTGCCCTCGCCGGCCGAGGAGGCCGACCACGACCTCTGTGTGCACTTGGTGC  
AGCTGCTCCACAGCACACTGGTGGATAAAATGCAGACCATGCAGGTGGCCGAGAAGTGCC  
TGCAGATGGACATCTTCCAGGAAGAGGACCTGGATCGGATCCAAACTGTTACTGACAATCG  
TGGGAACAGAGATGGTGCAAGGGAGCTATTGAGCAGAATAGTGCAGAAGAAAGATTGGTT  
CTCTCCTTTTTTGATTGCTCTGCGTGAAACTCAACATGGAGGCCTTGCAGATGATTTAAGCG  
GAAATACAGGAGGAACAGAGAATAGACAAAATGGGATGAAGAACAGTACAAACGAAGAAA  
CAGAAGTTACAAGCCAACCAGGATATGCCATAGTGGAGAATTTGAAACAGCAAGAAAATGT  
GAATGATAGTTTCAGCAGTGAGAATAGTGTATTGGAAGCATCTATTGAAAGAATTCTGTAG  
TTTCAGATGTCTCCATAGGAGATGGAAGTGTCAAGTAACCTGAATGAAACCCTGGGACAGAG  
CTGCACAACCAGTGATTTCAGATGAAGATGAAGTGGAGAGCAGAGCTTCACCTGAGCCAGA  
TCTGACCCTCAGAGATTACCAGAAGGAAGTTGCAAAGCCAGCACTGAATGGGGAGAATATT  
ATAATATGTCTCCCTACAGGCAGTGGTAAAACCAGAGTGGCTGTTTACATTACCAAAGATCA  
CCTGGATAAGAAGAAGAGAGCATCAGAGCCTGGAAAAGTTATAGTACTTGTTAATAAGGTA  
CCATTGGTAGAACAGCATTTACGAAAGGAGTTTAATCCATTCTGAAGCGTTGGTATCAGG  
TCATTGGTTTAAGTGGTGATTCTCAGCTGAAAATCTCATTTCTGAAGTTGTCAGAAGAAAT  
GATGTCATCATCAGTACAGCACAGATCCTTGAGAATTCAGTGTAAATGCAGGTGAAGAAG  
ATGAAGAAGGTGTCCACTTATCAGATTTTTTCACTCATCATTATCGATGAGTGTATCACACT  
CAAAAGGAAGGTGTCTACAACAATATAATGCGACGTTACTTAAAAGAAAAGATGAAGAACA  
GGAAGCTGGCAAAAAGAAAACAAACCACTGATCCCACAGCCTCAGATTCTGGGACTTACAG  
CCTCACCTGGTGTAGGAGGTGCAACATCCTACTCAAAGCGGAAGAACATATTCTGAAAAT  
CTGTGCCAATCTTGATGCATGTAGAATCATGACTGTTGAAGAGCATGCCTCCCAGCTGAAG  
AATCAGGTGAAGGAACCATATAAGAAGACCGTGATTGCAGATGACAAAAGAAGGGATCCAT  
TTAGAGAGAGAATTACTGAGATCATGACAGACATTCAAACCTATTGCCAGCTCCATCCAAAA  
TCTGAGTTTGGAACCTCAGCCATATGAACAGTGGGTGATTAGAGAAGAGAGAAGAGCTGCAA  
AAGAAGAAAAACGCAAGGAACGTGTCTGTGCAGAACTTGAAGAAATACAATGATGCTCT  
CCAGATAAATGACACCATCCGAATGGTGGATGCGTACAATCACCTAAATAACTTTTATAAGG  
AGGAGAAAAGTAAGAAGACAGTAAGGAGTGATGATGATGATGAACCATTAGTATCAAAACA  
GGATGAAACAGATGAATTTCTAATAAGTTTATTTTATTTCATTCAAAAAAGAAACAGCTGAAAGAGT  
TGGCTAGAAAGCCAGAATATGAAAATGAGAAGCTAATACAGTTGCGAAACACTTTAATGGA



GGAGTTCACGAAGACTGAGGAACCTAGAGGAATTATTTTCACAAAGACTCGGCTAAGTGCC  
TTTGCTCTATTCCAGTGGATTAAAGATAACCCAAAATTCTGAAGAAGTGGGAATAAAGGCC  
GTTATCTTATCGGTGCTGGACATAACAGTGAAATTAACCCATGACTCAGAATGAACAAAG  
GGAAGTTATTGATAAATTCCGAGGTGGAAAAGTAAATTTACTTATTGCTACTACTGTAGCTG  
AGGAAGGCCTAGACATCAAAGAGTGTAACATCGTTATTTCGCTATGGCCTCGTCACCAATGA  
AATTGCTATGGTGCAGGCTCGCGGTTCGAGCTCGAGCTGATGAAAGCACCTATGCACTTGT  
GGCTTCGAGTGGCTCAGGAGCTGTTGAACGTGAAGATGTTAATATTTTCCGTGAAAAAATG  
ATGTATAAGGCCATTACAGCATGTCCAGAAGATGCCACGGGAGGAGTATTTAAATAAGATTC  
AGAATTTCCAGTTGCAAAGTATAGTGAAAAACAAATGAAGGCAAAGAGAGATCAGCGCAA  
GACATACAAGAAAAACCCCTTCACTAGTAACATTCCTATGCAAAAATTGCCACAAGCTGATAT  
GTTCTGGAGAAGACATTCAAGTTATTGAAAACATGCATCATGTCAGTGTGAAAAAAGATTTT  
CAAAGTCTTTACCATACAAGAGAAAAATAAGACACTGCAAGATAAGAATGCTGATTACCAGAC  
AATGGGGAAATTATATGTAAAGATTGTGGACAAGCTTGGGGAAATATGATGGTTCACCGT  
GGTCTTGACCTGCCTTGTCTAAAGATTAGAAATTTTGTGGTTGTGTTTGAAGACAAGAAAA  
AACAAAGCAAATTTTTTAAGAAATGGGGAGAACTGCCCATTAGGTTCCCTAGTTTTGATTATG  
CAGCTCATTGGCCTTCAAGTGATGAAGATTAA

>penelope\_pileata-mda5

ATGTCCGAGGAGTGCCGAGACGAGCGCTTCCTCTACATGATCTCGTGCTTCAGACCGCGG  
CTGAAGCGGTGCATCCGGGTGCAGCCGGTGCTGGACTGGCTGCCCTCGCTGCGCGCGGA  
GGACAAGGAGAGGGTGCGGGTGGCAGCTCTGCAGCGCGGCGAAGTGAGGGGGGCCGAG  
GAGCTGCTGCGCGCCGTGGAACGCGGCCCCACGGCCCCGGCTGGTTCCCTGAGTTCCT  
GCAGGCGCTGGAGAGGGGCGGCTGCGACCTGGCTGCCTGCTACGTGAACCCAGCCTCA  
GCCAGCTGCCCTCTCCAGCGAGGAGGCCGAGCACGACCTATGCGTGCCTTGGTGCAG  
CTGCTGCATGGCACGCTGGTGGATAGGATGCAGCCCAGGCAGGTGGCCGAGCAGTGCCT  
GGAGATGGGCATCTTCCAGGAGGAGGATCTGGTTCGGATTGATGCTGTTATTGACAACCAT  
GGGAACAGAGATGGTGCAAGGGAGCTGTTGAGCAGAGTAGTGCAAGAAGGATTGGTTC  
TCTCCTTTTTTGTCTCGCTCTGCGTAGAACCCAAACATGAAGGCCTTGCAGATGATTTAAGCG  
GAAATACAGGAGGAACAGAGAATAAAGAAAAATGAGATGAAGAACAGTACAAGCAAAGAAGC  
AGAAGATGCAAGCCAACCAGGACATGTCATAGTGGAAGATTTGAAACAGCAAGAAAATTTG  
GATGATAGTTTTGTGAGAAAGAACACTGTATTGGAACATCTGTTGGAAGAAGTCTATAGT  
TTCAGAATCAATTGTCACTGCAGGAGATGGAAGTGTGAGTAGCTTAAATGGAACCTGGGA  
CAGAGCAGCACAAACCAGTGATTCAGATGAAGATGAAGTAGAGAGAAGAGCTTCACCTGAG  
CCAGAGCTGATCCTGAGAGATTACCAGATGGAAGTTGCAAAGCCAGCACTGAATGGGGAG  
AATATTATAATATGTCTCCCTACAGGCAGTGGCAAAACCAGATTGGCTGTTTATATTACAA  
AGATCACTTGGATAAGAAGAAAAAAGCATCAGAGCCTGGAAAAGTTATCGTACTTGTTAACA  
AGGTACCATTAGTGGAACAGCATTTACGAAAGGAGTTAATCCATTCCTGAAACGTTGGTAT  
CAGGTTATTGGGTTAAGTGGTGATTCTCAGCTGAAAATCTCATTTTCATGAAGTTGTCAGAAG  
AAGTGATGTCATCATCTGTACAGCACAGATCCTGGAGAATTCAGTGTAAATGCAACTGAA  
GAAGGTGAAGAAGGTGTCCATTTATCAGATTTTTCACTCATCATTATTGATGAGTGTGATCA  
CACCCAAAAAGAAGGTGTCTACAACAATATAATGCGACGTTATTTAAAACAAAAGATCAAGA  
ACAGAAAGCTGGCAAAAGAAAACAAACCTCTGATTCCACAGCCTCAGATTCTGGGACTTAC  
AGCCTCACCGGGAGTAGGAGGTGCAAGAAACAACGCAAAAGCTGAAGAACATATTCTGAA  
AATCTGTGCCAGCCTTGATGCACGCAGAATCATGACTGTAAAGAGCATGCCTCCCAACTG  
GAGAATCAGGTGAAGGAACCATTTAAGAAGACTGTGATTGCAGATGACAAAAGAAGGGATC

CATTTAGAGAAAGAATTATTGAGATCATGACAGAAATTCAAAACTATTGCCAGCTCTATCCA  
AAATCTGAGTTTGGATCTCAGCCTTATGAACAGTGGGTGGTTAGAGAAGAGAAAAAGCTG  
CAAAAGAAGAAAAACGCAAGGAACGAGTCTGTGCAGAACACCTGAAGAAATATAATGATGC  
TCTGCAAATCAGTGACACCATCAGAATGGTCGATGCGTACAATCACCTAAACAACTTTTATA  
AGGATTTAAAAAGCAAGAAGACAGTAGAGAGTGATGATGATGAAGAGCCAGTAGTACTAAA  
ACAGGATGAAACAGATGAATTTCTAATAAATCTATTTTCATGCAAAAAAGAAACAGCTGAAAG  
AGTTGGCTAGAAAGCCAGAATATGAAAATGAGAAGCTACTGAAGTTGCGAAACACTTTAAT  
GGAGGAGTTCACAAAGACTGAAGAATCTAGAGGAATTATTTTCACAAAGACTCGGCAAAGT  
GCCTTTGCTCTGTTCCAGTGGATTACGGATAACCCAAAATTTAAAGAAGTGGGAATTAAG  
CTCATTACCTTATTGGTGCTGGACACAACAGTGAACTAAACCTATGACTCAGAATGAACAA  
AGGGAAGTCATCGATAAATTCCGAGGTGGAAGTGTAATTTACTTATCGCTACTACTGTAG  
CTGAGGAGGGCCTAGACATCAAAGAGTGTAACGTTGTTATTTCGCTATGGTCTGGTCACAAA  
TGAAATTGCTATGATGCAGGCCCGTGGTCGAGCTCGATCCAGTGAGAGCACCTATGCACT  
TGTGGCTTCAGCTGGCTCAGGAGCTGTTGAACGTGAAGATGTAATATGTTCCGTGAGAAA  
ATGATGTATAAGGCAATTCAACGTGTCCAGAACATGCCGCCAGAAGAGTATTTAGATAAGA  
TTGAAGACTTACAGTTGCAAAGTATAATGGAAAAGCAAATGAAGGCAAAGAGAGATCAGCG  
TAAGACATATATGAAAAATCCTTCAGTAGTAGCATTCTATGCAAGAATTGCCAGAAGATGA  
TATGTTTCAGGAGAAGATATACAAGTTATTGAAGACATGCATCATGTCAGTGTGAAAAAAGAT  
TTCCAACATCTTTACCACACAAGAGAAAAATAAGACACTGCAAGATAAACATGCTGATTATCA  
GACAAATGTGGAAATTATATGTAAAGATTGTGGACAAGCTTGGGGAAATATGATGGTTTATC  
GAGGTCTTGACCTGCCTTGTCTAAAGATTAGAAATTTTGTGCTTGTTTTTGGAGACAAGAAA  
ACAACCAAGGACATTTTCAAGAAATGGAAAGAACTGCTCATCAGCTTCCCTAAGTTTGATTA  
TGCAGCTCATTGTCCTTCAAGTGATGAAGATTAA

>phalacrocorax\_pelagicus-mda5

ATGGCAGAGGCGTCCCGAGACGAGCGCTTCCTCTACATGATCTCCTGCTTCAGGCCGCGG  
CTGAAGCAGTTCATCCGGGTGCAGCCGGTGTTGGACCGGCTGCCCTCGCTGAGTGCCGT  
GGACAGGGAGAAGGTGCGGGCGGTGGCCCTGCAGCAGGGCGAGGTGGAGGGGGCAGA  
GGAGCTGCTGCGGGCCGTGGAGCGGGGACCCCGCGGGTGCGGCTGGTTCCACGAGTTC  
CTGCAGGCACTGGAGCACGGCGGCTGCAGCCTGGCCGCCTGCTACGTGAACCCAGCCT  
CAGCCAGCTGCCCTCGCCGGCCGAGGAGGCCGACCACGACCTCTGCGTGCACTTGGTGC  
AGCTGCTCCACAGCACGCTGGTGGACAGAATGCAGACCATGCAGGTGGCCGAGAAGTGC  
CTGCAGATGGGCATCTTCCAGGACGAGGACCTGGATCGGATCCCACTGTTACTGACAAT  
CGTGGGAACAGAGATGGTGCAAGGGAGCTGTTGAGCAGAATAGTGCAGAAGAAAGATTGG  
TTCTCTCCTTTTTTGATCGCTCTGCGTGAAACCCAACACGGAGGCCTTGCAAGATGATTTAA  
GTGGAAATACAGGAGGAACAGAGAATAGACAGAATGGGGTGGAGGACAATACAAACGAAG  
AAACAGAAGTTACAAGCCAACCAGAATATGCTGTAATGAAGGATTCGAAACAGCAAGAAAA  
TTTGAATAGTAGTTTCAGCAGAGAGAACAGTGTATTGGAAACATCTATTGGAAAGAATTCTG  
TAGTTTCAGAGTCAGATGTCTCCATCGGAGATGAAAGTGTCAGTAACTTGAATGAAAACCT  
GGGACAGAGCTGCACAACCAGTCATTTCAGATGAAGATGAAATGGAGAGCAGAGCTTCACC  
TGAGCCTGATCTGATCCTGAGAGATTACCAGATGGAGGTTGCAAGGCCAGCACTGAATGG  
GGAGAATATTATAATATGCCTCCCTACAGGCAGTGGTAAAACCAGAGTGGCTGTTTACATT  
ACCAAAGATCACTTGGATAAGAAGAAAAGAGCATCAGAGCCTGGAAAAGTTATAGTACTTG  
TCAATAAGGTACCGTTGGTAGAACAGCATTTACGAAAGGAATTTAATCCATTCTGAAGCGT  
TGGTATCAAGTTACTGGTTTAAGTGGTGATTCTCAGCTGAAAATCTCATTTCTGAAGTTGT

CAGAAGAAATGATGTCATCATCAGTACAGCACAGATCCTTGAGAATTCAGTGTAAATGCAG  
CCGAAGAAGATGAAGAAGGTGTCCACTTATCAGACTTTTCACTCATCATTATTGATGAGTGT  
CATCACACTCAAAAGGAAGGTGTCTACAACAATATAATGCGACGTTACTTAAAAGAAAAGAT  
GAAGAACAGGAAGCTGGCAAAAGAAAACAAACCACTGATCCACAGCCTCAGATTCTGGG  
ACTTACAGCCTCACCTGGTGTGGGAGGTGCAACATCCTACTCAAAAGCTGAAGAACATATT  
CTGAAAATCTGTGCCAATCTGGATGCATATAGGATCATGACTGTGCAAGAGCACGCCTCCC  
AGCTGAAGAATCAAGTGAAGGAACCATATAAGAAGACTGTGATCGCAGATGACAAAAGAAG  
GGATCCATTTAGAGAAAAGATTACTGAGATCATGACAGACATTCAAACTATTGCCAGCTCC  
ATCCAAAATCTGAGTTTGGAACTCAGCCATATGAACAGTGGGTGATCAGAGAAGAGAGAAG  
AGCTGCAAAAGAAGAAAAACGCAAGGAACGTGTCTGTGCAGAACTTGAAGAAATACAAT  
GATGCTCTCCAGATAAATGACACCATCCGAATGGTGGATGCATACAATCACCTAAATAACTT  
TTATAAGGAGGAGAAAAGTAAGAAGACTGTAAGGAGCGATGATGATGATGATGAACCA  
GCAGTATCAAAACAGGATGAAACAGATAAATTTCTAATAGGTTTATTTTCATGCAAAAAAGAA  
ACAGCTGAAAGAATTGGCTAGAAAGCCAGAATATGAAAATCAGAAGCTAATACAGTTGCGA  
AACACTTTAATGGAAGAGTTCACGAAGACAGAGGAACCTAGAGGAATTATTTTCACAAAGA  
CTCGGCTAAGTGCCCTTTGCTCTATTCCAGTGGATTAAGGATAACCCAAAATTTGAAGAAGT  
GGGAATTAAGGCCATTATCTTATTGGTGTCTGGACATAACAGTGAAATTAACCCATGACTC  
AGAATGAGCAAAGGGAAGTTATTGATAAATTCCGAGGTGGGAATATAAATTTACTTATTGCT  
ACTACTGTAGCTGAGGAAGGCCTGGACATCAAAGAGTGTAAACATCGTTATTTCGCTATGGCC  
ACGTCACCAATGAAATTGCTATGGTGCAGGCTCGCGGTGCGAGCTCGAGCTGATGAGAGCA  
CCTATGCACTTGTGGCTTCGAGTGGCTCAGGAGCTATTGAACGTGAAGATGTTAATAATTT  
CCGTGAGAAAATGATGTATAAGGCCATTCAGCGTGTCCAGAACATGCCACAGGAAGAGTAT  
TTAAATAAGATTCAGAATTTCCAGTTGCAAAGTATAATGGAAAACAAATGAAGGCCAAAGAG  
AGACCAGCGCAAGACATACAAGAAAAATCCTTCACTAATAACATTCCTATGCAAAAATTGCC  
ACAAGCTGGTATGTTCTGGAGAAGATATACAAGTTATTGAAAACATGCATCATGTCAGTGTG  
AAAAAAGATTTCCAAAGTCTTTACCATACAAGAGAAAATAAGACACTGCAAGATAAGCATGC  
TGATTACCAGACAAATGGGGAAATTATATGTAAAGATTGTGGACAAGCTTGGGGAAATATG  
ATGGTTCACCGAGGCCTTGACCTGCCTTGTGTAAAGATTAGAACTTTGTGGTTGTGTTTG  
AAGACAAGAAAACAATAAAGCAAATTTTTAAGAAATGGGGGAGAACTGCCCGTCACGTTCCC  
TAGTTTTGATTATGCAGCTCATTGTCTTCAAGTGATGAAGATTAA

>phoenixopterus\_ruber-mda5

ATGGCTGAGGAGTCCCGAGACGAGCGCTTCCTCTACCTGATCTCCTGCTTCAGGCCGCGG  
CTGAAGCAGTTCATCCGGGTGCAGCCGGTGTCTGGACCAGCTTCCCTCGCTGAGCGCGGA  
GGAGAGGCAGAAAGGTGCGGACGGCCGCCCTGCAGCGGGGCGAGATGGAGGGGGCGGA  
GGAGCTGCTGCGGGCCGTGGAGCGGGGGCCCCGCGGGTGCAGGCTGTTCCACGAGTTC  
CTGCAGGCACTGGAGCAGGGTGGCTGCAGCCTGGCCGCCTGCTACGTGAACCCACGCCT  
CAGCCAGCTGCCCTCGCCGGCCGAGGAAGCCGACCACGACCTCTGTGTGCACTTGGTGC  
AGCTGCTCCACAGCACACTGGTGGATAAAATGCAGACCATGCAGGTGGCCGAGAAGTGCC  
TGCAGATGGGCATCTTCCAGGACGAGGACCTGGATCGGATCCCACTGTTACCAACAATC  
ATGGGAACAGAGATGGTGCAAGGGAGCTATTGAGCAGAATAGTGCAAGAAAGATTGGT  
TCTCTCCTTTTTTATTGCTCTGCGTGAAACCCAACATGGAGGCCTTGCAGATGATTTAAGC  
GGAAATACAGGAGGAACAGAGAATAGAGAAAATGTGATGAAGAACAGTACAAATGAAGAAA  
TGGAAGTTACAAGCCAACCAGGATATGCTGTAGTGGAGGATTTGAAACAGCAAGAAAATGT  
GAATGATAATTTACGAGTGAGAACAGTGTATTGAAACATCTGTTGAAAGAATTCTGTAG

TTTCAGAGTCAGATGTCTCCATAGGAGATGGAAGTGTTGATAACTTGAATGAAAACCTGGG  
ACAGAGCTGCACAACCAGTGATGCAGATGAAGATGAAGTGGAGAGCAGAGCTTCACCTGA  
GCCAGATCTGATCCTGAGAGATTACCAGATGGAAGTTGCCAAGCCAGCACTGAATGGGGA  
GAATATTATAATATGTCTCCCTACAGGCAGTGGTAAAACCAGAGTGGCTGTTTACATTACCA  
AAGATCACTTGGATAAGAAGAGAAGAGCATCAGAGCCTGGAAAAGTTATAGTACTTGTTAA  
TAAGGTACCGTTGGTAGAACAGCACTTACGAAAGGAGTTTAATCCATTCTGAAGCGTTGG  
TATCAGGTTACTGGTTTAAAGTGGTGATTCTCAGCTGAAAATCTCATTTCTCTGAAGTTGTCAG  
AAGAAATGATGTCATCATCAGTACAGCACAGATCCTTGAGAATTCATTGTTAAATGCTGTGC  
AAGAAGATGAAGAAGGTGTCCACTTATCAGATTTTTCTACTCATCATTATCGATGAGTGTAT  
CACACTCAAAGGAAGGTGTCTACAACAATATAATGCGACGTTACTTAAAAGAAAAGAAGAA  
GAACAGGAAGCTGGCAAAAGAAAACAAACCACTGATCCCACAGCCTCAGATTCTGGGACTT  
ACAGCTTCACCTGGTGTAGGAGGTGCAACATCCAACCTCAAAGCAGAAGAACATATTCTGA  
AAATCTGTGCCAATCTTGATGCACGTAGAATCATGACTGTTAAAGAGCATGCCTCCCAATTG  
GAGAATCAGGTGAAGGAACCATATAAGAAGACTGTCATTGCAGATGACAAAAGAAGGGATC  
CATTTAGAGAGAGAATTACTGAGATCATGACACACATTCAAACCTATTGCCAGCTCCATCCC  
AAATCGGAGTTTGGAACTCAGCCATATGAACAGTGGGTGATTAGAGAAGAGAGAAAAGCTG  
CAAAAGAAGAAAAACGCAAGGAACGTGTCTGTGCAGAACACTTGAAGAAATACAATGATGC  
TCTCCAGATAAATGACACCATCCGAATGGTGGATGCGTACAATCACCTAAATAACTTCTATA  
AGGAGGAGAAAAGTAAGAAGACAGTAAGGAGTGATGATGATGATGATGAACCACAGTAT  
CAAAACAGGATGAAACAGATGAATTTCTAATAGGTTTATTTTCATGCAAAAAAGAAACAGCTG  
AAAGAGTTGGCTAGAAAGCCAGAATATGAAAACGAGAAGCTAATACAGTTGCGAAACACTT  
TAATGGAGGAGTTCACGAAGACTGAGGAACCGAGAGGAATTATTTTCACAAAGACTCGGCT  
AAGTGCTTTGCTCTATTCCAGTGGATTAAGGATAACCCAAAATTTGAAGAAGTGGGAATTA  
AGGCCCATATCTTATTGGTGCTGGACATAACAGTGAAATTAACCCATGACTCAGAATGA  
GCAAAGGGAAGTCATTGATAAATTCGAGATGGACGTATAAATTTACTTATTGCTACTACTG  
TAGCTGAAGAAGGCCTAGACATCAAAGAGTGTAACATCGTTATTCGCTATGGCCTCGTCAC  
CAATGAAATTGCTATGGTGCAGGCTCGCGGTGAGCTCGAGCTGATGAGAGCACCTATGC  
ACTTGTGGCTTCGAGTGGCTCAGGAGCTGTTGAACGTGAAGATGTTAATATTTTCCGTGAG  
AAAATGATGTATAAGGCCATTGAGCGTGTCCAGAACATGCCACAGGAAGAGTATTTAAATA  
AGATTCAGAATTTCCAGTTGCAAAGTATAGTGGAAAACAAATGAAGGCAAAGAGAGATCA  
GTCCAAGACATACAAGAAAAATCCTTCACTAATAACATTCTATGCAAAAATTGCCACAAGC  
TGATATGTTCTGGAGAAGACATTCAAGTTATTGAAAACATGCATCATGTCAGTGTGAAAAAA  
GATTTCCAGAGTCTTTACCATACAAGAGAAAATAAGACACTGCAAGATAAGCATGCCGATTA  
CCAGACAAATGGGGAAATTATATGTAAAGATTGTGGACAAGCTTGGGGAAATATGATGGTT  
CACCGAGGTCTTGACCTGCCTTGTCTAAAGATTAGAAATTTTGTGGTTGTGTTGGAAGACA  
AGAAAACAAAAAAGGAAATTTTAAAGAAATGGGCAGAACTGCCCATCAGGTTTCCTAGTTTT  
GATTATGCAGCTCATTGTCTTCAAGTGATGAAGATTAA

>phylloscopus\_trochilus-mda5

ATGGCGCAGGGCAGCCGGGACGAGCTGTTCTCTACATGATCTCCTGCTTCAGGCCGCG  
GCTGAAGCAGTTCATCCAGGTGCAGCCCGTGCTGGACCGGCTGCCGTGCTGAGCGCAG  
AGGACAGGGACCGTGTGCGTGCGGCCGCCCTGCAGCGCGGCGCGGCGGGCGGCCG  
AGGAGCTGCTGCGCGCCGTGGAGCGGGGGCCCCGCGGCTGCGGCTGGATCCGCGAGTT  
CCTGCAGGCGCTGGAGCACGGTGGCTGCAGCCTGGCCGCCTGCTACGCCAACCCAGCC  
TGAGCCAGCTGCCCTCGCCGGCACAGGAGGCCGAGCACGACCTGTGCGTGACCTGGTG

CAGCTGCTGCACGGCACGCTGGTGGAAAGGATGCGCGCCGTGCCGGTGGCCGAGAAGT  
GCCTGGAGATGCAAATCTTCCAGGACGAGGACGTGGATCGGATCCAGACTGTTACTGACA  
ATCATGGGAACAGAGATGGTGCAAGGGAGCTACTGAGCAGAATAGTCCAGAAGAAAGATT  
GGTTCTCTTCTTTTTTCTTCTCCGTGAAACACAACATGAAGACCTCGCAGATGATTTA  
AGTGGAAATACAGGAGAGAATAAAACAAATTGGGATGGAGCAGACTGCAAATGAAGAGACA  
GAAGTTACAAGCCAACCTGGACACGTACAGAGGAGAATTTGAAACAGGAAGAAAATGTG  
GATGATAGTTTCAGCAGTGAGAACAGTGTGTTGGAAACATCCATAGAAAAGAATTCTGTGG  
TATCAGAATCAGATGTCTCCATAGGAGATGAAAGTGTGAGTAACTTGAATGAAAACCTGGG  
ACAGAGCTGCACAACCAGTGATTGAGATGAAGTGGAGAGGAGAGCCTCACCCAGCCAGA  
TCTGACCCTGAGAGATTACCAGATGGAAGTTGCAAAGCCAGCACTGAATGGGGAGAATATT  
ATAATATGTCTCCCTACGGGCAGTGGTAAAACCAGAGTGGCTGTTTACATTACCAAAGATC  
ACTTGGATAAGAAGAAAAGAGCATCAGAGCCTGGAAAAGTCATAGTACTTGTTAATAAGGT  
TCCATTGGTAGAACAGCATTTACAAAGAGAGTGGTCCATTCTGAAGCGTTGGTATCAG  
GTTATTGGTTTAAAGTGGTGATTCTCAGCTGAAAATCTCATTTCTGAAGTTGTCAGAAAGAA  
TGATGTCATCATCAGCACAGCACAGATCCTTGAGAATCACTGTTAAATGCATCCAAGGAA  
GATGAGGAAGGTGTCCGCTTATCAGATTTTTCCCTCATCATTATTGACGAGTGTGCATCACAC  
TCAAAAGGAAGGTGTCTACAACAATATAATGCGACGTTACTTAAAAGAAAAGGTGAAGAAC  
AGGAAGCTGGCAAAAGAAAACAAACCAGTGATCCACAGCCTCAGATTCTGGGACTTACA  
GCCTCACCTGGTGTAGGAGGTGCAACATCCTACTCAAAAGCTGAAGAGCATATTTTGAAAA  
TCTGTGCCAATCTCGATGCATGTAGAATTATGACTGTTGAAGAGCATGCCTCCCAGCTAAA  
GGATCAGGTGAAGGAACCGTCTAAGAAGACTGTGATTGCAGATGACAAAGAAAGAGATCC  
ATTTAAAGAGAAAAATTACTGAGATCATGACAGAAATACAAAACCTACTGCCAGCTGCATCCCA  
AGTCTGAGTTTGGAAGTCAAGACATATGAACAGTGGGTGATCAGAGAAGAGAGAAGAGCTG  
CAAAAGAGGAAAAACGCAGGGAACGTGTCTGTGCAGAGCACCTGAAGAAATACAATGATG  
CTCTCCAGATAAACGACACCATCCGAATGGTGGATGCCTACAATCACCTAAATAACTTCTAC  
AAAGAGGAGAAAAAGAAAGGAAGGCAGCAAGGAGTGATGATGGTGATGATGATGGTGAT  
GATGATGATGAACCAGCAGTATCTAACAGGATGAAACAGATGAATTTCTAATAGGTTTATT  
TCATGCAAAAAAGAAACAACCTGAAAGAGTTGACTGGAAAGCCAGAAAATGAAAATGAGAAG  
CTAACAAAGTTGAGAAGTACTTTAATGGAGGAGTTCACAAAGATTGAGGAACCTCGAGGAA  
TCATTTTACAAAGACACGTCTAAGTGCCTTTGCTCTATTCCAGTGGATTAAGGACAACCCA  
AAATTTGAAGAAGTGGGAATTAAGGCCATTATCTTATCGGCTCAGGACATAAGAGTGAAA  
TGAAGCCCATGACTCAGAATGAGCAAATGGAAGTTATTGATAAATTTGACGTGGAAATATA  
AATTTACTAATTGCTACTACTGTAGCTGAGGAAGGCCTGGACATCAAAGAGTGTAATTCGT  
TATTCGCTATGGGCTCGTCACCAATGAAATTGCTATGGTGCAGGCTCGTGGTAGAGCTCGA  
GCTGATGAAAGCACCTATGCTCTTGTGGCTTCAAGTGGCTCAGGGGCTGTTGAACGTGAA  
GATGTTAATATTTTTTCGTGAGAAAATGATGTATAAGGCCATTGAGCGTGTCCAGAACATGCC  
ACAGGAAGAGTATTTAAAAAAGATTGAGAGTTTCCAGTTGCAAAGTATACTGGAAAAACAAA  
TGAAGGCAAAGAGAGATCAGCTCAAGACATACAAGAAAAATCCTTCGCTAATAAAATTCTTA  
TGCAAAAATTGCTCCAAGCCGATATGTTCTGGAGAAGACATACAAGTTATTGAAGACATGC  
ATCATGTCAGTGTGAAAAAAGATTTCCAAAGTCATTATCATACAAGAGAAAATAAAACACTG  
CAGGATAAGCATGCTGATTACCAGACAAATGGGGAAATAATATGCAAAGACTGTGGACAAG  
CTTGGGGAAATATGATGGTTCACCGAGGTCTTGACCTGCCTTGTCTAAAGATTAGAAATTTT  
GTCGTTGTGTTTGCAGACAAGAAAAACAACAAACAAATTTTTAAGAAATGGGGGGATCTGC  
CCATCAGGTTTCCTAGTTTTGATTATGCAGCTCATTGTCCTTCAAGTGATGAAGATTAG

>picoides\_pubescens-mda5

ATGGTAGAGTCGTCCCGAGACGAGCGCTTCCTCTACATGATCTCCTGCTTTAGGCCGCGG  
CTGAAGCAGTGCATCCGGGTGCAGCCGGTGCTGGACCAGCTTTTCTCGCTAAGCGCCGAA  
GAAAAGGAGAAGGTGCGGGTGGCCGCCTTGCAGCGGGGCGATGTGGAGGGAGCAGAGG  
AACTGCTGCGGGCCGTGGAGCGGGGGCCCCGCGGCTGTGGCTGGTTCCTCGAGTTCCTG  
CAGGCGCTTGAGAACGGCGGGTGCAGCCTGGCCGCTGCTACATAAACCCAGCCTCAG  
CCAGCTGCCCTCGCCGGCCGAGGAGGCCGACCATGACCTCTGCGTGCAGTTGGTGCAGC  
TACTCCACAGCACACTGGTGGATAAAATACGGACCGTAGAATTGGCAGAGAAGTGCATGG  
AGATGGGCATCTTCCAGGAAGAGGACTTGGATCGGATCCATGCTGTTACTGACAATCGTG  
GGAACAGAGATGGTGCAAGGGAGCTATTGAGCAGAATAGTGCAGAAGAAGGACTGGTTCT  
CTCATTTTTTGGTTGCTCTGCGTGAAACCCAAACATGGAAGCCTTGCAGATGAATTAAGTGG  
AAATACAAAAGGAACAGAGAACAGGCCAAAATGGGATGAAGAACAGTACAAATGAAGAATTG  
GAGGATTTGAAACAGCAAGAAAATGTGAATGATAGTTTCAACAGTGAGAACAATATATTGGA  
AACATCTGTTGGAAGAATTCTGTCAATTCAGAATCAGATGTCTTCACAGGAGGTGGAAGT  
GTCAGCTTGAATGAAAACCTGGGACAGTCCTACAATACCAGTGATTCAGATGACGATGAAG  
GGGAGAACAGAGCTTCACCAGAGCCAGATTTGATCCTGAGAGATTACCAGATGGAAGTTG  
CAAAGCCAGCCCTGAATGGAGAGAATATTATAATATGTCTTCCTACAGGCAGTGGTAAAAC  
CAGAGTGGCTGTTTACATTACCAAAGATCACTTGGATAAGAAGAAAAAAGCATTAGAGCCT  
GGAAAAGTTATAGTACTTGTAACAAGGTCTCATTGGTAGAACAGCATTTACAAACGGAGTT  
TAATCCATTCTTGAAGCGCTGGTATCACGTTACTGGTTTAAGTGGTGATACTCAGCTGAAAA  
TCTCATTTTCTGAAGTTGTCAGAAGACATGATGTCATCATCAGTACAGCACAGATCCTAGAG  
AATGCACTGATAAATGCAGCTAAGAAGATGAAGAAGGTGTACACTTATCAGATTTTTTCACT  
CATCATTATTGATGAATGTCATCACACTCAAAGGAAGGTGTCTACAACAACATAATGCGAC  
GTTACTTAAACAAAAGATTAAGAACAAGAAGCTAGCAAAAGAAAACAAACCACTGATTCCA  
CAGCCTCAGATTCTGGGACTTACAGCCTCACCAGGTGTAGGAAGTGCAACATCTTCCTTAA  
AAGCTGAAGAACATATTCTGAGAATCTGTGCCAATCTTGATGCCCATAGAATCATGACTGTT  
GAAGAGCATGCCTCCAGTTGAAGAATCAGGTGAAAGAACCATATAAAAAAACTGTGATTG  
CAGATGACAAAAGAAAGGATCCATTTAGAGAGAGAATTACTGAGATCATGACAGACATTCA  
AACTACTGCCAGCTCCATCCAAAATCTGAGTTTGGAACTCAGCCATATGAACAGTGGGTG  
ATTAGAGAAGAGAGAAGAGCTGCAAAAGAAAAAAACGCAAGGAACGTGTCTGCGCAGAA  
CACCTGAAGAAATACAATGATGCTCTCCAGATAAATGACACCATCCGAATGATAGATGCATA  
CAATCACCTACGTGAGTTTTATAAGGAGGAGAAAAGTAAAAAGATGGTAAGGAGTGATGAC  
GATGATGATGACGAACCAGCAGTAACAAAACAGGATGAAACAGATGAATTTCTAATAGGTT  
TATTTTCATGCAAAAAGGAAACAGCTGAAAGAGTTGGCTAGAAATCCAGAATATGAAAATGA  
GAAGCTAATACAGCTGCGAAACACTTTAATGGAGGAGTTCACAAAGACTGAGGAACCTAGA  
GGAATTATTTTACAAAGACTCGGCTAAGTGCCCTTGCTCTGTTCCAGTGGATTAAGGATAA  
CCCAAAATTTGAAGAAGTGGGAATTAAGGCCATTACCTCATTGGAGCTGGACATAACAGT  
GAAACTAAACATATGACTCAGAATGCACAAAGGGATGTTATTGATAAATTCCGAAGTGGAAA  
TGTAATTTTACTTATTGCTACCACTGTAGCTGAGGAAGGCCTAGATATCAAAGAGTGTAACA  
TTGTTATTCGCTATGGCCTCGTCACCAATGAAATTGCTATGATGCAGGCTCGTGGTCGAGC  
TCGAGCTCCTGAGAGCACCTATGCACTTGTGGCTTCAGTTGGCTCAGGAGCTGTTGAACG  
TGAGGATGTTAATGTTTTCCGTGAGAAAATGATGTATAAGGCCATTCAACGTCTCCAGAAGA  
TGCCACAGGAAGAGTATTTAAATAAGATTTCAGGAATTCCAGTTGCAAAGTGTACTGGAAAG  
ACGCATGAAGGCAAAGAGAGATCAGCACAAAGACACACAAGAAAAATTCTTCATTAATAAAAT

TCCTATGCAAAAATTGCCACAACTGATATGTTCTGGAGAAGATATTCAAGTTATTGAAAAG  
ATGCATCATGTGAGTGTGAAAAAAGATTTCCAAAGTCTTTATCATACAAGAGAAAATAAGAC  
ACTGCAAGATAACCATGCTGATTCCCAGACAAATGGGGAGATTATATGTAAAGACTGTGGA  
CAAGCTTGGGGAAATATCATGGTTCACCGAGGTCTTGCCCTACCTTGTCTAAAGATTAGCA  
ATTTTGTGGTTGTGTTTGAAGACAAAAAGCCAACAAAAGATATTTTAAAAAATGGAAAGAT  
CTGCCTGTTAGTTTCCCTAGGTTTGATTATGCAGCTCATTGTTCTTCAAGTGATGAAGATTA  
A

>pipra\_filicauda-mda5

ATGGAAGAGGGGGACCGGGACGAGAGGTTCTCTACATGATCTCCTGCTTCAGGCCGCG  
GCTGAAGCAGTTCATCCAGGTGCAGCCCGTGCTGGACCAGCTCCCCTCGCTGAGCGCGG  
AGGAGAGGGAGAAAGGTGCGGGCGGCCCTCCTGCAGGGGGGCGCTGTGGCGGGGGCCG  
AGGAGCTGCTGCGGGCCGTGGAGCGGGGGCCCCGCGGCTGCGGCTGGTTCCACGAGTT  
TCTGCAGGCACTGGAGCACGGCGGCTGTAGCCTGGCCGCCTGCTACGCCAACCCAGCC  
TCAGCCAGCTGCCCTCGCCGGCCGAAGAGGCCGACCACGACCTCTGCGTGCACCTGGTG  
CAGCTGCTCTACAGCACGCTGGTGGACAGGATGCGGGCCGTGCAGGTGGCCGAGAAGTG  
CCTGGAAATGGGCATCTTCAAGGAGGAGGACCTGGAGCGGATCCAGACTGTTACTGACAA  
TCGTGGGAACAGAGAGGGTGCAAGGGAGCTTCTAAGCAGAATAATGCAGAAGAAAGATTG  
GTTCTCTCCTTTTTTGTGTTGCTCTCCGTGAAACCCAACATGGAGACCTGGCAGATGATTTAA  
GTGGAAATACAGGAGGAACAGAGAATAGACAAAATGAGATGAAGAACAGTACAAATGAAGA  
AACAGAAATTACAAGCCAACCAGGATATGCCACAGTGGAGGATTTGAAACAGCAAGAAAAT  
GTGAATGATAGTTTCATCAGTGAGAACAGTGTATTGGAAACATCCATGGGAGAGAATTCTG  
TAGATTACAGAGTCAGATGTCTCCATAGGAGATGGAAGTGTCCGTAACCTCAGTGAAAACCT  
GGGTCAGAGCTGCACAACCAGCAATTCAGATGAAGAGGAGAGGAGAGCTTCACCTGAGCC  
AGATCTGACCCTGAGAGATTACCAGATGGAAGTTGCAAAGCCAGCACTAAATGGGGAGAA  
TATTATAATATGTCTCCCTACAGGCACTGGTAAAACCAGAGTGGCTGTTTACATTACCAAAG  
ATCACTTGGATAAGAAGAAAAGAGCATCAGAGCCTGGAAAAGTCATAGTACTTGTTAATAA  
GGTACCACTGGTACAACAGCATTTAGAATCAGAGTTTCATCCATTCTGAAGCGTTGGTAT  
CAGGTTATTGGTTTAAAGTGGTGATTGTCAACTGAAAATCTCATTTCCTGAAGTTGTCAGAAG  
AAATGATGTCATCATCAGTACAGCACAAATCCTTGAGAATTCACTGATAAATGCAGACAAAG  
AAGATGAAGAAGGTGTCCACTTATCAGATTTTTCCCTTATCATTATTGATGAGTGTATCAC  
ACGCAGAAGGAAGGTGTCTACAACAATATAATGCGACGTTACTTAAAAGAAAAGATGAAGA  
ACAGGAAGCTGGCAAAGAAAACAAACCACTGATCCCACAGCCTCAGATTCTGGGACTTAC  
AGCCTCACCTGGTGTAGGAGGCGCAAATCCTACGCAAAGCTGAAGACCATATTCTGAAA  
ATCTGTGCCAATCTTGATGCATGTAGAATTATGACTGTTGAAGAGCATGAGGACCAGTTAAA  
GAATCAGGTGAAGGAGCCGTCCAAGAAGACTGTGGTTGCAAATGACAAAAAAGGGATCC  
ATTTAGAGAGAAAATTACTGAGATCATGACAGAAATACAAAACCTATTGCCAGCTCCATCCAA  
AATCCGAGTTTGGAACTCAGACATACGAACAGTGGGTGATCAGAGAAGAGAAAAGAGCTG  
CAAAAGAAGAAAAACGCAAGGAACGTGTCTGTGCAGAACACTTGAAGAAATACAATGATGC  
TCTCCTGATAAATGACAGTATCCGAATGGTGGATGCATACAATCACCTAAATAACTTTTATA  
AGGAGGAGAAAAGTAAGAAGACAGTAAGGAGTGATGATGATGATGAACCAGCTGTAT  
CAAAACAGGATGAAACAGATGAATTTCTAATAGGTTTATTTTCATGCAAAAAAGAAGTGGCTG  
AAAAAGTTGGCTGGAAAGCCAGAACATGAAAATGAGAATCTAATACAGCTGCGAAATACTT  
TAATGGAGGAGTTCACGAAGACTGAGGAACCTAGAGGAATTATTTTACAAAGACTCGTCT  
AAGTGCCTTTGCTCTATTCCAGTGGATTCAAGACAACCCAAAATTTAAAGAAGTGGGAATTA

AGGCCCATATCTTATCGGCTCTGGACATAACAGTGAAATGAAACCCATGACTCAGAATGA  
GCAAAGGGAAGTTATTGATAAATTCCGATGTGGAAATTTAAATTTACTTATTGCTACTACTGT  
AGCTGAGGAAGGCTTGGACATCAAAGAGTGTAACATCGTTATTCGCTATGGCCTTGTCAAC  
AATGAAATTGCTATGGTGCAGGCTCGTGGTCGAGCTCGAGCTGATGAGAGCACCTATGCT  
CTTGTGGCTCCGAGTGGCTCAGGAGCTGTTGAACGTGAAGATGTTAATATTTTCCGTGAGA  
AAATGATGTATAAGGCCATTCAGCGTGTCCAGAAGATGCCACAGGAAGAGTATTTAAATAA  
GATTCAGAATTTCCAGTTGCAAAGTATAGTGGAAAAACAAATGAAGGCAAAGAAAGATCAG  
CGCAAGACATACAAGAAAAATCCTTCACTAATAACATTCTTATGCAAAAATTGCCACAAAAC  
GATATGTTCTGGAGAAGACATACAAGTTATTGAGAACATGCATCATGTCAGTGTGAAAAAAG  
ATTTCCAAAGCCTTTATCATACAAGAGAAAATAAGACACTGCAAGATAAGCATGCCGATTAC  
CAGACAAATGGGGAAATTATATGTAAAGATTGTGGACAAGCTTGGGGAAATATGATGGTTC  
ACCGAAGCCTTGACCTACCTTGTCTGAAGATTAGAAATTTTGTGGTTGTGTTTGCAGACAAG  
AAAACAACAAAGCAAATTTTTAAGAAATGGGGAGAAGTGGCCGTCAGGTTTCCTAGTTTTGA  
TTATGCAGCTCATTGTCCTTCAAGTGATGAAGATTAA

>poecile\_atricapillus-mda5

ATGGCAGAGGGCACCCGGGACGAGCGGTTCTCTACATGATCTCCTGCTTCAGGCCGCG  
GCTGAAGCAGTTCATCCAGGTGCAGCCGGTGCTGGACCGGCTCCCTCGCTGAGCGCGG  
AGGACAGGGACCGGGTGCGGGCGGCCGCCCTGCAGCGCGGCGCGCGCGGGCGCGCGG  
AGGAGCTGCTGCGGGCCGTGGAGCGCGGGCCCCGCGGCTGCGGCTGGATCCGCGAGTT  
CCTGCAGGCGCTGGAGCACGGTGGCTGCAGCCTGGCCGCCTGCTACGCCAACCCAGCC  
TGAGCCAGCTGCCCTCGGCGGCAGAGGAGGCCGAGCACGACCTCTGCGTGCAGCTGGTG  
CAGCTGCTGCACGGCACGCTGGTGGACAGGATGCGCACCGTGCAGGTGGCCGCCAGGT  
GCCTGGAGATGGGCATCTTCCAGGAGGAGGACATGGATCGGATCCAGACTGCTACTGATA  
ATCGTGGAACAGAGATGGTGCAAGGGAGCTACTGAGCAGAATAGTCCAGAAGAAAGATT  
GGTTCTCATCTTTTTTGGTTGCTCTCCGTGAAACCCAACATGAGGACCTTGACAGATGATTTA  
AGTGGAATAACAGGAGAGAATAAAACAAAATGGGATAGAGCAGACTACAAACGAAGAAACAG  
AAGTTAGAAGCCAACCAGGATATGACATAGAGGAGAATTTGAAACAGGAAGAAAATGTGGA  
TGATAGTTTCAGCAGTGAGAACGGTGTGTTGGAACATCCATACAAGAGAATTCTGTGGTG  
TCAGAGTCAGATGTCTCCATAGGAGATGGAAGCGTCAGTAACCTAAATGGAAACCTGGGAC  
AGAGCTGCACAGCCACTGATTCAGATGAAGTGGAGAGGAGAGCCTCACCTCAGCCAGATC  
TGACCCTGAGAGATTACCAGATGGAAGTTGCAAAGCCAGCACTGAATGGGGAGAATATTAT  
AATATGTCTCCCTACGGGCAGTGGTAAAACCAGAGTGGCTGTTTACATTACCAAAGATCAC  
TTGGATAAGAAGAAAAGGGCATCAGAGCCTGGAAAAGTCATAGTACTTGTTAATAAGGTTC  
CATTGGTAGAACAGCATTTACAAACAGAGTTTAGTCCATTCTGAAGCGCTGGTATCAGGT  
TATTGGTTTAAAGTGGTGATTCTCAGCTGAAAATCTCATTTCTGAAGTTGTCAGAAGAAATG  
ATGTCATCATCAGTACAGCACAGATCCTTGAGAATTCAGTGTTAAATGCATCCAAGGAAGAT  
GAAGAATGTGTCCACTTATCAGATTTTTCCCTCATCATTATTGATGAATGTCATCACACTCAA  
AAGGAAGGTGTCTACAACAATATAATGCGACGTTACTTAAAAGAAAAGATGAAGAACAGGA  
AGCTGGCAAAAAGAAAACAAACCACTGATCCCACAGCCTCAGATTCTGGGACTTACAGCCTC  
ACCTGGTGTAGGAGGTGCAACATCCTACTCAAAGCTGAAGAGCATATTCTGAAAATCTGT  
GCCAATCTTGATGCATGTAGAATTATGACTGTTGAAGAGCACGCCTCTCAGCTGAAGAATC  
AGGTGAAGGAACCGTCTAAGAAGACTGTGATTGCAGATGACAAAAGAAGGGATCCATTTAA  
AGAAAGAATTACTGAGATCATGAGAGAAATACAAAACCTATTGCCAGCTGCATCCAAAGTCT  
GAGTTTGGAAGTCAAGACCTATGAACAGTGGGTGATCAGAGAAGAGAGAAGAGCTGCAAAA



GAAGAAAAACGCAGGGAACGTGTCTGTGCAGAACACTTGAAGAAATACAATGATGCTCTCC  
AGATAAATGACACCATCCGAATGGTGGATGCCTACAATCACCTAGATAACTTTTTATAAAGAG  
GAGAAAAGTAAGAAGACAGTAAGGAGTGATGATGATGATGATGATGAACCAGCAGTATCAA  
AACAGGATGAAACAGATGAATTTCTAATAGGTTTATTTTCATGCAAAAAAGAAACAGCTGAAA  
GAGTTGACTGGAAAGCCAGAAAATGAAAATGAGAAGCTAATAAAGTTGAGAAATACTTTAAT  
GGAGGAGTTCACAAAGACTGAGGAACCTCGAGGAATCATTTTCACAAAGACTCGTCTAAGT  
GCCTTTGCTCTATTCCAGTGGAATTAAGGACAACCCAAAATTTGAAGAAGTGGGAATTAGGG  
CCCATTATCTTATTGGCTCTGGACATAAGAGTGAAATCAAGCCCATGACTCAGAATGAGCA  
AAGGGAAGTTATTGATAAATTTTCGATGTGGAAATGTAAATTTACTAATTGCTACTACTGTAG  
CTGAGGAAGGACTGGACATCAAAGAGTGTAACATCGTTATTTCGCTATGGCCTTGTACCAA  
TGAAATTGCTATGGTGCAGGCTCGTGGTAGAGCTCGAGCTGATGAAAGCACCTATGCTCTT  
GTGGCTTCAAGTGGCTCAGGGGCTGTTGAACGTGAAGATGTTAATATTTTTTCGTGAGAAAA  
TGATGTATAAGGCCATTTCAGCGTGTCCAGAAGATGCCACAGGAAGAGTATTTAAATAAGAT  
TCAGAGTTTCCAGTTGCAAAGTATAGTGGAAAAACAAATGAAGGCAAAGAGAGATCAGCGC  
AAGACATGCAAGAAAAATCCTTCACTAATAAAATTCTTATGCAAAAAATTGCAACAAGCTGAT  
ATGTTCTGGAGAAGACATACAAGTTATTGAAGACATGCATCATGTGAGTGTGAAAAAAGATT  
TCCCAAGTCTTTATCATACAAGAGAAAAATAAAACACTGCAAGATAAGAATGCCGATTACCAG  
ACAAATGGGGAAATTGTATGCAAAGACTGTGGACAGGCTTGGGGAAATATGATGGTTCCACC  
GAGGTCTTGACCTGCCTTGTCTTAAGATTAGAAATTTTGTGGTTGTGTTTGCAGACAAGAAA  
ACAACAAAGCAAATTTTTAAGAAATGGGGAGAACTGCCCATCAGGTTTCCTAGTTTTGATTA  
TGCAGCTCATTTTCCTTCAAGTGATGAAGATTAA

>pseudopodoces\_humilis-md5

ATGGCAGAGGGCACCCGGGACGAGCGGTTCTCTACATGATCTCCTGCTTCAGGCCGCG  
GCTGAAGCAGTTCATCCAGGTGCAGCCCGTGCTGGACCGGCTCCCCTCGCTGAGCGCGG  
AGGACAGGGACAGGGTGCGGGCGGCCGCCCTGCAGCGCGGCGCGGCGGGCGCGCGG  
AGGAGCTGCTGCGGGCCGTGGAGCGCGGGCCCCGCGGCTGCGGCTGGATCCGCGAGTT  
CCTGCAGGCGCTGGAGCACGGTGGCTGCAGCCTGGCAGCCTGCTACGCCAACCCAGCC  
TGAGCCAGCTGCCATCGGCGGCAGAGGAGGCCGAGCACGACCTCTGCGTGCAGCTGGTG  
CAGCTGCTGCACGGCACGCTGGTGGACAGGATGCGCACCGTGCAGGTGGCCGCCAGGT  
GCCTGGAGATGGGCATCTTCCAGGAGGAGGACATGGATCGGATCCAGACTGCTACTGATA  
ATCGTGGGAACAGAGATGGTGCAAGGGAGTTACTGAGCAGAATAGTCCAGAAGAAAGATT  
GGTTCTCTTCTTTTTTGGTTGCTCTCCGTGAAACCCAACATGAGGACCTTGCAGATGATTTA  
AGTGGAATACAGGAGAGAATAAACAAAATGGGACAGAGCAGACTACAAATGAAGAACTG  
AAGTTAGAAGCCAACCAGGATATGACATAGAGGAGAATTTGAAACAGGAAGAAAATGTGGA  
TGATAGTTTTAGCAGTGAGAACAGTGTGTTGGAAACATCCATACAAGAGAATTCTGTGGTG  
TCAGAGTCAGATGTCTCCATAGGAGATAGAAGCGTCAGTAACTTAAATGAAAATCTGGGAC  
AGAGCTGCACAGCCACTGATTCAGATGAAGTAGAGAGGAGAGCCTCACCTCAGCCAGATC  
TGACCCTGAGAGATTACCAGATGGAAGTTGCAAAGCCAGCACTGAATGGGGAGAATATTAT  
AATATGTCTCCCTACGGGCAGTGGTAAAACCAGAGTGGCTGTTTACATTACCAAGGATCAC  
TTGGATAAGAAGAAAAGGGCATCAGAGCCTGGAAAAGTCATAGTACTTGTTAACAAGGTTT  
CATTGGTAGAACAGCATTTACAAACAGAGTTTAGTCCATTCTGAAGCGCTGGTATCAGGT  
TATTGGCTTAAGTGGTGATTCTCAGCTGAAAATCTCATTTCTGAAGTTGTCAGAAGAAATG  
ATGTCATCATCAGTACAGCACAGATCCTTGAGAATTCAGTGTAAATGCATCCAAGGAAGAT  
GAAGAATATGTCCACTTATCAGATTTTTCCCTCATCATTATTGATGAATGTCATCACACTCAA

AAGGAAGGTGTCTACAACAATATAATGCGACGTTACTTAAAAGAAAAGATGAAGAACAGGA  
AGCTGGCAAAAGAAAACAAACCACTGATCCCACAGCCTCAGATTCTGGGACTTACAGCCTC  
ACCTGGTGTAGGAGGTGCAACATCCTACTCAAAGCTGAAGAGCATATTCTGAAAATCTGT  
GCCAATCTTGATGCATGTAGAATTATGACTGTTGAAGAGCATGCCCCCAGCTGAAGAACC  
AGGTGAAGGAACCATCTAAGAAGACTGTGATTGCAGATGACAAAAAAGGGATCCATTTAA  
AGAGAGAATTACTGAGATCATGACAGAAATACAAAACCTATTGCCAGCTGCATCCAAAGTCT  
GAGTTTGGAACCTCAGACGTATGAACAGTGGGTGATTAGAGAAGAGAGAAGAGCTGCAAAA  
GAAGAAAAACGCAGGGAACGTGTCTGTGCAGAACACTTGAAGAAATACAATGATGCTCTCC  
AGATAAATGACACCATCCGAATGGTGGATGCCTACAATCACCTAGATAACTTCTATAAAGAG  
GAGAAAAGTAAGAAGACAGTAAGGAGTGATGATGATGATGATGATGAACCAGCAGTATCAA  
AACAGGATGAAACAGATGAATTTCTAATAGGTTTATTTTCATGCAAAAAAGAAACAGCTGAAA  
GAGTTGACTGGAAATCCAGAAAATGAAAATGAGAAGCTAATAAAGTTGAGAAATACTTTAAT  
GGAGGAGTTCACAAAGACTGAGGAACCTCGAGGAATCATTTTCACAAAGACTCGTCTAAGT  
GCCTTTGCTCTATTCCAGTGGATTAAGGACAACCCAAAATTTGAAGAAGTGGGAATTAGGG  
CCCATTATCTTATCGGCTCTGGACATAAGAGTGAAATCAAGCCCATGACTCAGAATGAGCA  
AAGGGAAGTTATTGATAAATTTTCGATGTGGAAATGTAAATTTACTAATTGCTACTACTGTAG  
CTGAGGAAGGACTGGACATCAAAGAGTGTAACATCGTTATTCGCTATGGCCTTGTCACCAA  
TGAAATTGCTATGGTGCAGGCTCGTGGTAGAGCTCGAGCTGATGAAAGCACCTATGCTCTT  
GTGGCTTCAAGTGGCTCAGGGGCTGTTGAACGTGAAGATGTTAATATTTTTTCGTGAGAAAA  
TGATGTATAAGGCCATTCGGCGTGTCCAGAAGATGCCACAGGAAGAGTATTTAAATAAGAT  
TCAGAGTTTCCAGTTGCAAAGTATAGTGGAAAAACAAATGAAGGCCAAAGAGAGATCAGCGC  
AAGACATGCAAGAAAAATCCTTCACTAATAAACTCTTATGCAAAAATTGCAACAAGCTGAT  
ATGTTCTGGAGAAGACATACAAGTTATTGAAGACATGCATCATGTGAGTGTGAAAAAAGATT  
TTCCAGGTCTTTATCATACAAGAGAAAATAAAACACTGCAAGATAAGAATGCTGATTCCAG  
ACAAATGGGGAAATTGTATGCAAAGACTGTGGACAGGCTTGGGGAAATATGATGGTTCACC  
GAGGTCTTGACCTGCCTTGTCTAAAGATTAGAAATTTTGTGGTTGTGTTTGCAGACAAGAAA  
ACAACAAAGCAAATTTTTTAAGAAATGGGGAGAAGTGGCCATCAGGTTTCCTAGTTTTGATTA  
TGCAGCTTATTGTCCTTCAAGTGATGAAGATTAA

>pseudorectes\_ferrugineus-mda5

ATGGCGGACAGCACCCGGGACGAGCTGTTTCTGTACCTGATCTCCTGCTTCAGGCCGCG  
GCTGAAGCAGTGCATCCAGGTGCAGCCCGTGCTGGACGGGCTGCCCTCGCTGAGCGCGG  
AGGACCGGGAGCGGGTGCGTGCGGCCGCCCTGCAGCGGGGCCAGGCGGCGGGGGCGG  
AGGAGCTGCTGCGGGCCGTGGAGCGGGGGCCCCGCGGCTGCGGCTGGATCCGCGAGTT  
CCTGCAGGCGCTGGAGCACGGCGGCTGCAGCCTGGCCGCCTGCTACGCCAACCCAGC  
CTGAGCCAGCTGCCCTCGCCGGCAGAGGAGGACGAGCACGACCTCTGCGTGCACCTGGT  
GCAGCTGCTCCACGGCACGCTGGTGGACAGGATGCGGACCGTGAGGTGGCCGAGAAGT  
GCCTGGAGATGGGCATCTTCCAGGAGGAGGACATGGATCGGATCCAGACTGTTACAGACA  
ATCGTGGGAACAGAGATGGTGCAAGGGAGCTCCTGAGCAGAATAGTGCAGAAGAAAGATT  
GGTTCTCTTCTTTTTTGATTGCTCTCCGTGAACTCAACATGAAGACCTTGCAGATGATTTA  
AGTGGAAATACAGGAGAGAATAAAACAAAATGGGATGGAGAAGGGTACAAACGAAGAACCA  
GAAGTTACAAGCCAACCAGGATACATCATAGCAGAGAATTTGAAACAGGAAGAAAATGTGG  
ATGATAGTTTCAGCAGTGAGAACAGTGTATTGGAAACATCCATAGAAAAGAATTCTGTGGT  
GTCAGAGTCAGATGTCTCCATAGGAGATGGAAGTGTGAGTAAGTGAATGAAAATCTGGGA  
CAGAGCTGCACAACCAGTGATTCAGATGAAGTGGAGAGGAGAGCCTCACCTGAGCCAGAT

CTGACCCTGAGAGATTACCAGATGGAAGTTGCAAAGCCAGCACTGAATGGGGAGAATATTA  
TAATATGTCTCCCTACGGGCAGTGGTAAAACCAGAGTGGCTGTTTACATTACCAAAGACCA  
CTTGGATAAGAAGAGAAGAGCATCAGAGCCTGGAAAAGTCATAGTACTTGTTAATAAGGTG  
CCATTGGTAGAACAGCATTTACAAACAGAGTTTGGTCCATTCTGAAGCGTTGGTATCAGG  
TACTGGTTTAAGTGGTGATTCTCAGCTGAAAATCTCATTTCTGAAGTTGTCAAAAGAAAT  
GATGTCATCATCAGTACTGCACAGATCCTTGAGAATTCGCTGTAAATGCATCCAAGGAAG  
ATGAAGAAGGTGTCCACTTATCAGATTTTTCCCTCATCATTATCGATGAGTGTATCACACT  
CAAAAGGAAGGTGTCTACAACAATATAATGCGACGTTACTTAAAAGAAAAGATGAAGAACA  
GGAAGCTGGCAAAAGAAAACAAACCACTGATCCCACAGCCTCAGATTCTGGGACTGACAG  
CCTCACCTGGTGTAGGAGGTGCAACATCCTACTCAAAGCTGAAGAGCATATTCTGAAAAT  
CTGTGCCAATCTTGATGCATGTAGAATTATGACTGTTGAAGAGCATGCCTCCCAGCTAAAG  
AATCAGGTAAAGGAACCGTCTAAGAAGACTGTGATTGCAGATGACAAAAAAGGGATCCAT  
TTAAGGAGAGAATTACTGAGATTATGACAGAAATACAAAATTATTGCCAGTTGCATCCAAAA  
TCTGAGTTTGGAACTCAGACATATGAACAGTGGGTGATCAGAGAAGAGAGAAGAGCTGCA  
AAAGAAGAAAAACGCAGGGAACGTGTCTGTGCAGAACACTTGAAGAAATACAATGATGCTC  
TCCAGATAAATGACACCATCCGAATGGTGGATGCCTACAATCACCTAAATAACTTTTATAAA  
GAGGAGAAAAAGTAAGAAGACAGTAAGGAGTGATGATGATGATGATGATGAACCAGCA  
GTATCAAAACAGGATGAAACAGATGAATTTCTAATAGGCTTATTTTCATGCAAAAAAGAAGAA  
GCTGAAAGAGTTGAGTGGAAAGCCAGAAAATGAAAATGAGAAGCTAATAAAGTTGAGAAAT  
ACTTTAATGGAGGAGTTCACAAAGACTGAGGAACCTCGAGGAATTATTTTCACAAAGACTC  
GTCTAAGTGCCTTTGCTCTCTTCCAGTGGATTAAGGACAACCCAAAATTTGAAGAAGTGGG  
AATTAGGGCCCCATTATCTTATCGGCTCTGGACATAACAGTGAGATGAAGCCCATGACTCAG  
AATGAGCAAAGGGAAGTTATTGATAAATTTGACAGTGGAATGTAAATTTACTAATTGCTAC  
TACTGTAGCTGAGGAGGGCCTGGACATCAAAGAGTGTAACATTGTTATTCGCTATGGCCTC  
GTCACCAATGAAATTGCTATGGTGCAGGCTCGTGGTTCGAGCTCGAGCTGATGAAAGCACC  
TATGCTCTTGTGGCTTCAAGTGGCTCAGGGGCTGTTGAACGTGAAGATGTTAATATTTTTTC  
GTGAGAAAATGATGTATAAGGCCATTACGCGTGTCCAGAAGATGCCACAGGAAGAGTATTT  
AAATAAGATTACAGAGTTTCCAGTTGCAAAGTATAGTGGAAAAACAAATGAAGGCAAAGAGA  
GATCAGCGCAAGACATACAAGAAAAATCCTTCACTAATAAAATTTCTTATGCAAAACTTGCTA  
CAAGGCGATATGTTCTGGAGAAGACATACAAGTTATTGAAGACATGCATCATGTCAAGTGTG  
AAAAAAGATTTCCAAAGTCTTTATCACACAAGAGAAAAATAAAACACTGCAAGATAAGCATGC  
TGATTACCAGACCAATGGGGAAATTATATGTAAAGACTGTGGACAAGCTTGGGGAAATATG  
ATGGTTCACCGAGGTCTTGACCTGCCTTGTCTAAAGATTAGAAATTTTGTGGTTGTGTTTGC  
GGACAAGAAAAACAACGAAGCAAATTTTTAAGAAATGGGGAGAACTGCCCATCAGGTTTCCT  
GGTTTTGATTATGCAGCTCATTGTCTTCAAGTGATGAAGATTAA

>psittacula\_krameri-md5

ATGGCAGCGGAGTTGCTAGATGAGCGGTTCTCTACATGATCTCGTGCTTCAGGCCTCGG  
CTGAAGCAGTTCATTGGGTGCAGCCGGTGCTGGACCGGCTCCCTTCGCTCAGCGCGGA  
GGACAGGGAGAAGGTGCGGGCGGTGCGCTGCAGCGAGGCGAGGTGGAAGGGGCGGA  
GGAGCTGCTGCGGGCCGTGGAGCGGGGACCCCGCGGGTGTGGCTGGTTCCACGAGTTC  
TTGCAGGCGCTCGAGCAGGGCGGCTGCGGCATGGCCGCCTGCTACGTGAACCCAGCCT  
CAGCCAGCTGCCCTCGCCGGCCGAGGAGGCCGACCACGACCTCTGCGTTCAATTGGTGC  
AGCTGCTCCACAGCACGCTTGTGGATAGTATGCGGACCGTGCAGGTGGCCGAGAAGTGC  
CTGCAGATGGGCATCTTCCAGGATGAGGATCTGGATGGGATCCATACTGTTACTGACTGC

CGTGGTAACAGAGAAGGTGCAAGGGAGCTATTGAGCAGATTAGTGCAGAAGAAAGATTGG  
TTCTCTCGGTTTTTTGATTGCTCTGCGTGAAACCCAACATGGAGGCCTTGCAGATGATTAA  
GTGGAAATATAGGAGGAACAAAGGATAAACAAAATGAGATGAAGAACAGTACAAACGAAGA  
AACAGAAGTTACAAGCCAACCAGATTATGCCATAGTGGAGGATTTGAAGCAGCAGGAAAAT  
ATGAATGATAGTTTCAGCAGTGAGAACAAATTTATTGGAAACATCTGTTGGAAAGAATTCTGT  
AGTTTCAGAGTCAGATGTCTCTATGGGAGTTGGAAGTGTCAGTAACTTGAATGAAAACCTG  
GGACAGAGCTGCACAAGCAGTGATTTCAGATGAAGAAGAGAGCAGAGCTTCACCTGAGCCA  
GATCTGGTCCTGAGAGATTACCAGATGGAAGTTGCAAAGCCAGCACTGAATGGGGAGAAT  
ATTATAATATGTCTCCCTACAGGCAGTGGTAAAACCAGAGTGGCTGTTTACATTACCAAAGA  
TCATTTGGATAAAAAAGAAAAGAGCATCAGAGCCTGGAAAAGTTATAGTCCTTGTTAATAAGG  
TACCATTGGTAGAACAGCATTACGAAAGGAGTTTAGTCCATTCTGAAGCGCTGGTATCA  
CATTATTGGTTTAAGTGGTGATTCTCAGCTGAAAATCTCATTTTCTGAAGTTGTCAGAAGAA  
ATGATGTCATCATCTGTACAGCACAGATCCTTGAGAATTCAGTCTAAATGCAGACAAAGAA  
GATGAAGAAGGTGTCCACTTATCAGATTTTTCACTTATCATTATTGATGAGTGTATCACAC  
TCAAAGGAAGGTGTCTACAACAACATAATGCGACGTTACTTAAAAGAAAAAAGAAGAACA  
GGAAGCTGGCAAAAGAAAACAAACCACTGATCCCACAGCCTCAGATTCTGGGACTTACAG  
CCTCACCTGGTGTAGGAGGTGCAACATCCTATTCCAAAGCTGAAGAACATATTCTGAAAAT  
CTGTGCCAATCTTGATGCATGTAGAATCATGACTGCTGAAGAGCATGCCTCCCAGCTGAAG  
AATCAGGTGAAGGAACCTTTTAAGAAGACTGTGATTGCAGATGACAAAAAAGGGATCCAT  
TTAGAGAGAGAATAACTGAGATCATGACAGAGATTCAAACCTATTGCCAGCTTCATCCAAAA  
TCTGAGTTTGGAACCTCAGCCATATGAACAGTGGGTGATCAGAGAAGAGAAAAAAGCTGCAA  
AAGAAGAAAAACGCAAGGAACGTGTCTGTGCAGAACACCTGAAGAAATACAATGATGCTCT  
CCAGATAAATGATACCATCCGAATGGTAGATGCATACAATCACCTGAATAACTTTTATAAGG  
ATGAGAAAAGTAAGAAGACAGTAAGGAGTGATGATGATGATGATGCACCAGCAGTATCAAA  
ACAGGATGAAACAGATTTATTTCTAATAGGTTTATTTTCATGCAAAAAAGAAACAGCTGAAAG  
AGTTGGCTAGAATGCCAGAATATGAAAATGAGAAGCTAACACAGTTGCGAAACACTTTAAT  
GGAGGAGTTCACGAAGACTGAGACACCTAGAGGAATTATTTTCACAAAGACCCGGCTAAGT  
GCCTTTGCTCTATTCCAGTGGATTAAGGATAACCCAAAATTTGAAGAAGTGGGAATTAAGG  
CCCATTATCTTATTGGTGCTGGACATAACAGTGAAATGAAACCCATGACTCAGAATGAGCA  
ACGGGAAGTTATTGATAAATTCGAGGTGGAAATTTGAATTTACTTATTGCTACTACTGTAG  
CTGAGGAAGGCCTAGACATCAAAGAGTGTAACATTGTTATTCGCTACGGCCTCGTCACCAA  
TGAAATTGCTATGGTGCAGGCTCGTGGTGCAGCTCGAGCTGATGAGAGCACCTATGCACT  
TGTGGCTTCGAGTGGCTCAGGGGCTGTTGAACGTGAAGATGTTAATATTTTCCGTGAGAAA  
ATGATGTATAAAGCCATTTCAGCATGTCCAGAAGATGCCACAGGAGGAGTATTTAAAGAAGA  
TTCAGAATTTCCAGTGTCAAAGTATAGTGGAAAAAGAAATGAAGGCCAAAGAGACATCAGCA  
CAAGACATACAAGAAAAATCCTTCACTGATAACATTCTTATGCAAAAATTGCCACAAGCTGG  
TATGTTCTGGGGAAGACATACGAGTTATTGAAAACATGCATCATGTCAGTGTGAAAAGAGA  
TTTCCAAAGTCTTTACCATACGAGAGAAAATAAGACACTGCAAGATAAAAATGCTGATTACC  
AGATAAATGGAGAAGTTATATGTAAAGATTGTGGACAAGCTTGGGGAAATATGATGGTTCA  
CCGTGGTCTTGACCTGCCTTGCTAAAGATTATAAATTTTGTGATTGTGTTTGAAGACAAGA  
AGACAAGAAAAGAAATTTTTAAGAAATGGAGAGAGCTGCCCATCAAGTTCCTGGTTTTGAT  
TACGCAGCTCATTGTCCTTCAAGTGATGAAGATTAA

>psittacus\_timneh-mda5

ATGGCAGGGGAGTTGCTAGACGAGCGGTTCTCTACATGATCTCGTGCTTCAGGCCGCGG

CTGAAGCAGTTCATCCGAGTGCAGCCGGTGCTGGACTGGCTCCCTTCGCTCAGCGCGGAA  
GACAGGGAGAAGGTGCGGGCGGCCGCGCTGCAGCGGGGCGAGGTGGAAGGGGCGGAG  
GAGCTGCTGCGGGCCGTGGAGCGGGGACCCCGCGGGTGTGGCTGGTTCCACGAGTTCTT  
GCAGGCGCTGGAGCACGGCGGCTGCGGCATGGCCGCTTGCTACGTGAACCCCAGCCTCA  
GTCAGTTGCCCTCCCCGGCCGAGGAGGCCGACCACGACCTCTGCGTGCAATTGGTACAG  
CTGCTCCATAGCACTCTCGTGGATAATATGCGGACCGTGCAGGTGGCCGAGAAGTGCCTG  
CAGATGGGCATCTTCCAGGATGAGGACCTGAATGGGATCCATACTGTTACTGACAATCGTG  
GGAACAGAGAAGGTGCAAGGGAGCTATTGAGCAGATTAGTGCAGAAGAAAGGTTGGTTCT  
CTCGCTTTTTGATTGCTCTGCGTGAAACCCAACATGGAGACCTTGCAATGACTTAGGTGG  
AAATATAGGAGGAACAAAGGATAAACAAAATGGGATGAAGAACAGTACAAACAAAGAAACA  
GAAGTTACAAGCCAACCAGGTTATGCCATACTGGAGGATTTGAAGCAGCAGGAAAATATGA  
ATGATAGTTTCAGCAGTGAGAACAGTTTATTGGAAACATCTATTGGAAGAATTCTGTAGTT  
TCAGAGTCAGATGTCTCTATAGGAGTTGGAAGTGTGAGTAACCTGAATGAAAACCTGGGGC  
AGAGCTGCACAAGCAGTGATTCAGATGAAGAGGAGAGCAGAGCTTCATCTGAGCCAGATC  
TGGTCCTGAGAGATTACCAGATGGAAGTTGCAAAGCCAGCACTGAATGGGGAGAATATTAT  
AATATGTCTCCCTACAGGCAGTGGTAAAACCAGAGTGGCTGTTTACATTACCAAAGATCATT  
TGGATAAAAAGAAAAGAGCATCAGAGCCTGGAAAAGTTATAGTCCTTGTTAATAAGGTACC  
ATTGGTGGAACAGCATTACAAAAGGAGTTTAGTCCATTCCTGAAGCGCTGGTATCGTGTT  
ATTGGTTTAAGTGGTGATTCTCAGCTGAAAATCTCATTTCTGAAGTTGTCAGAAGAAATGA  
TGTCATCATCTGCACAGCACAGATCCTTGAGAATTCAGTCTAAATGCAGACAAAGAAGAT  
GAAGAAGGTGTCCAGTTATCAGATTTTTCACTCATCATTATTGATGAGTGTATCACACTCA  
GAAGGAAGGTGTCTACAACAACATAATGCGACGTTACTTAAAAGAAAAAAGAAGAACAGG  
AAGCTGACAAAAGAAAACAAGCCTCTGATCCCACAGCCTCAGATTCTGGGACTTACAGCCT  
CACCTGGTGTAGGAGGTGCAACATCCTATTCCAAAGCTGAAGAACATATTCTGAAAATCTG  
TGCCAATCTTGATGCATGTAGAATCATGACTGTTGAGGAACATGCCTCCCAGCTGAAGAAT  
CAGGTGAAGGAACCTTTTAAGAAGACTGTGATTGCAGATGACAAAAAAGGGATCCATTTA  
GAGAGAGAATTACTGAGATCATGACAGAGATTCAAACTATTGCCAGCTTCATCCAAAATCT  
GAGTTTGGAACCAACCATATGAACAGTGGGTGATCAGAGAAGAGAAAAAAGCTGCAAAAG  
AAGAAAAACGCAAGGAACGTGTCTGTGCAGAACACCTGAAGAAATACAATGATGCTCTCCA  
GATAAATGATACTATCCGAATGGTAGATGCGTACAATCACCTGAACAACCTTTTATAAGGATG  
AGAAAAGTAAGAAGACAGTAAGGAGTGATGATGATGATGATACACCAGCAGTATCAAAACA  
GGATGGAACAGATTTATTTCTAATAGGTTTGTTCACGCAAAAAAAGAAGGAGCTGAAAAAGT  
TGGCTAGAATGCCAGAATATGAAAATGAGAAGCTGACACAGTTGCGAAACACTTTAATGGA  
AGAGTTCACAAAGACTGAGGCACCTAGAGGAATTATTTTCACAAAGACCCGGCTAAGTGCC  
TTTGCTCTATTCCAGTGGATTAAGGATAACCCAAAATTTGAAGAAGTGGAATTAAGGCCCA  
TTATCTTATTGGTGCTGGACATAACAGTGAAATGAAACCCATGACTCAGAATGAGCAACGG  
GAAGTTATTGATAAATTCCGAGGTGGAAATTTGAATTTACTTATTGCTACTACTGTAGCTGA  
GGAAGGCCTAGACATCAAAGAGTGTAACATTGTTATTCGCTATGGTCTCGTCACCAATGAA  
ATTGCTATGGTGCAGGCTCGTGGTCGAGCTCGAGCTGATGAGAGCACCTATGCACTTGTG  
GCTTCAAGTGGCTCAGGAGCTGTTGAACGTGAAGACGTTAATATTTCCGTGAGAAAATGA  
TGTATAAAGCCATTGAGCATGTCCAGAAGATGCCACAGGAGGAGTATTTAAAGAAGATTCA  
GAATTTCCAGTGTCAAAGTATAGTGGA AAAAGAAATGAAGACAAAGAGACTTCAGCACAAG  
ACATACAAGAAAAATCCTTCACTAATAACATTCTTATGCAAAAATTGCCACAAGCTGGTATG  
TTCTGGGGAAGACATACAAGTTATTGAAAACATGCATCATGTCAGTGTGAAAAGAGATTTC

AAAGTCTTTACCATACAAGAGAAAATAAGACCCTGCAAGATAAGAATGCTGATTACCAGACA  
AATGGAGAAGTTATATGTAAAGATTGTGGACAAGCTTGGGGAAATATGATGGTTCACCGAG  
GTCTTGACCTGCCTTGTCTAAAGATTATGAATTTTGTGATTGTGTTTGAAGACAAAAGACA  
AGAAAAGAAATTTTTAAGAAATGGGGAGAGCTGCCCATCAAGTTCCTGGTTTTGATTATGC  
AGCTCATTGTCCTTCAAGTGATGAAGATTAA

>pterocles\_gutturalis-mda5

ATGGCAGAGGATTCCCGAGACGAGTGCTTCCTCTACTTGATCTCCTGCTTCAGGCCGCGG  
CTGAAGCAGTTCATCCGGGTGCAGCCGGTGCTGGACCAGCTCCCCTCGCTGAGCGCAGA  
GGACAAGGAGAAGGTGCGGACGGCCGCCCTGCAGCGGGGCGATGTGGAGGGGGCGGA  
GGAGCTGCTGCGGGCCGTGGAGAGGGGACCCCGCGGGTGCGGCTGGTTCACGAGTTC  
CTGCAGGCCCTGGAACACGGTGGCTGCAGCCTGGCCGCTTGCTACCTGAACCCAGCCT  
CAGCCAGCTGCCCTCACCAGCCGAGGAGGCGGACCACGACCTCTGCGTGCACTTGGTGC  
AGCTGCTCCACAGCACACTGGTGGATAAAATGCAGGCCATGCAGGTGGCCGAGAAATGCC  
TGCAGATGGACATTTTCCAGGAGGAGGACCTGGATCGGATCCGCACTGTTACTGAAATC  
GTGGGAACAGAGATGGTGCAAGGGAGCTACTGAGCAGAATAGTGCAGAAGAAAGATTGGT  
TCTCTCCTTTTTTGGTTGCTCTGCGTGAAACCCAACATGGAGGCCTTGACAGATGATTTGAG  
TGGAAATACAGGAGGAACAGAGAATAGACAAAATGGGATGAAGAACAGTACAAACGGAGA  
AACAGAAGTTACAGGCCAACCAGGATATGCTGTAGTGAATGAAGAAAATGTGAATGATGGT  
TTCAGCAATGAGAACAGTGTATTGGAAGCATCTATTGGAAGAATTCTGTAGTTTCAGAGTC  
AGATGTCTCCATAGGAGATGGAAGTGTCAGTAACTTGAATGAAAACCTGGGACAGAGCTGC  
ACAACCAGTGAGTCAGATGACGATGAAGTGGAGAGCAGAGCTTCACCTGAGCCGGATCTG  
ATCCTGAGAGATTACCAGATGGAAGTGGCAAAGCCAGCACTGAATGGGGACAATATTATAA  
TATGTCTCCCTACAGGCAGTGGTAAACTAGAGTGGCTGTTTACATTACGAAAGATCACTT  
GGATAAGAAGAAAAGAGCATCAGAGCCTGGAAGGTTATCGTACTTGTTAATAAGGTACCA  
TTGGTAGAACAGCATTTTACGAAAGGAGTTTAAATCCATTCTGAAGCGTTGGTATCATGTTAT  
TGGTTTAAAGTGGTGATTCTCAGCTGAAAATCTCATTTCTGAAGTTGTCAGAAAAAATGATG  
TCATCATCAGTACAGCACAGATCCTTGAGAATTCAGTGTAAAGGCAGCCGAAGAAGATGA  
AGAAGGTGTCCACTTATCAGATTTTTCACTCATCATTATTGATGAGTGTATCATACTCAAAA  
GGAAGGTGTCTACAACAATATAATGCGACGTTACTTAAAAGAGAAGATGAAGAACAGGAAG  
CTGGCAAAGAAAACAAACCACTGATCCCACAGCCTCAGATTTTGGGACTTACAGCCTCAC  
CTGGTGTAGGAGGTGCAACATCCTACGCAAAGCTGAAGAACATATTCTGAAAATCTGTGC  
CAATCTTGATGCATGTAGAATCATGACTGTTGAAGAGCATGCCTCCCAACTGAAGAATCAG  
GTGAAGGAACCATTTAAGAAAATGTGATTGCTGATGACAAAAGAAGGGATCCATTACAGAG  
AGAAAATTACTGAGATCATGAAAGACATCCAAAATATTGCCAGCTTTACCCAAAATCTGAG  
TTTGGAACCTCAGCCATATGAACAGTGGGTGATTAGAGAAGAGAGAAAAGCTGCAAAAAGAG  
AAAAACGCAAGGAACGTGTCTGTGCAGAACACTTGAAGAAATACAATGATGCTCTACAGAT  
AAATGACACCATCCGAATGGTGGACGCGTACAACCACCTAAATGACTTTTATAAGGAGGAG  
AAAAGTAAGAAGACAGTAAGGAGTGATGATAATGATGATGATGAACCAGAAGTATCAAAAC  
AGGATGAAACAGATGAATTTCTAATAGGTTTATTTAATGCAAAAAAAAAACAGCTGAAAGAG  
TTGGCTAGAAAGCCAGAATATGAAAATGAGAAGCTAATACAGTTGCGAAACACTTTAATGG  
AGGAGTTCACGAAGACTGAGGAACCTAGAGGAATTATTTTCAAAAGACGCGGCTAAGTGC  
ATTTGCTCTATTCCAGTGGATTAAGGACAACCCAAAATTTGAAGAAGTGGGAATTAAGGCC  
CATTATCTTATTGGTGCTGGACATAACAGTGAAATGAAACCCATGACTCAGAATGAGCAAA  
GGGAAGTTATTGATAAATTCGAGGTGGAAATGTAAATTTACTTATTGCTACTACTGTAGCT

GAAGAGGGCCTAGACATTAAAGAGTGTAACATCGTTATTCGCTATGGCCTGGTCACCAATG  
AAATTGCTATGGTGCAGGCTCGTGGTCGAGCTCGAGCTGATGAGAGCACCTATGCACTTG  
TGGCTTCGAGTGGCTCAAGAGCTGTTGAACGTGAAGATGTTAATATTTTCCGTGAGAATAT  
GATGTATAAGGCCATTTCAGCGTGTCCAGAAGATGCCCCAGGAAGACTATTTAAAGAAGATT  
CAGAATTTCCAGTTGCAAAGTATAGTGGAAAAACAAATGAAGGCAAAGAGAGATCAGCACA  
AGACATACAAGAAAAATCCTTCACTAATAACATTCTATGCAAAAATTGCCACAAGTTGATAT  
GTTCTGGAGAAGACATACAAGTTATTGAAAACATGCATCATGTCAGTGTGAAAAAAGATTTT  
CAAAGCCTTTACCATACAAGAGAAAAATAAGACGCTGCAAGATAAGCATGCCGATTACCAGA  
CAATGGGGAAATTATATGTAAAGATTGTGGACAAGCTTGGGGAAATATGATGGTTCACCG  
AGGTCTTGACCTTCCTTGTCTTAAGATTAGAAATTTTGTGGTTGTGTTTGAAGACAAGAAAA  
CAACAAAGCAAATTTTTAAGAAATGGGGAGAACTGCCTGTCAGGTTCCCTAGTTTTGATTAT  
GCAGCTCATTGTCTTCAAGTGATGAAGATTAA

>pygoscelis\_adeliae-md5

ATGGCAGAGGAGTCCCGAGACGAGCGCTTCCTCTACYTGATCTCCTGCTTCAGGCCGCGG  
CTGAAGCAGGTCATCCGGGTGCAGCCGGTGCTGGACCTGCTTCCCTCGCTGAGCGCTGG  
GGAGAGGGAGAGGGTGCGGGCGGCCGCGCTGCAGGGGGGCGAGGTGGAGGGGGCGGA  
GGAGCTGCTGCGGGTCTGTCGAGCGGGGGCCCCGCGGGTGCGGCTGGGTCCACGAGTTC  
CTGCAGGCGCTGGAGTACGGTGGCTGCAGCCTGGCCGCTGCTACGTGAACCCAGCCT  
CAGCCAGCTGCCCTCGGCGGCCGAGGAGGCGGACCATGACCTCTGCGTGCACCTTGGTGC  
AGCTGCTCCACAGCACGCTGGTGGACAGAATGCAGACCATGCAGGTGGCTGAGAAGTGC  
CTGCAGATGGGCATCTTCCAGGACGAGGACCTGGATCGGATCCACACTGTTACTGACAAT  
CGTGGGAACAGAGATGGTGCAGGGAGCTATTGAGCAGAATTGTGCAGAAGAAAGATTGG  
TTCTCTCCTTTTTTGAATTGCTCTGCGTGAAACCCAACATGGAGGCCTTGCAGATGATTTAAG  
CGGAAATACAGAAGGAACAGAGAATAGACAAAATGAGATGAAGAACAGTACAAATGAAGAA  
ACGGAAGTTACAAGCCAACCAGGATATGCCACAGTGGAGGATCTGAAACAGCAAGAAAAT  
GTGAATGATAGTTTCAGCAGTGAGAACAGTGTATCGGAACTTCTATTGGAAAGAATTCTAT  
AGTTTCAGAGTCAGATGTCTCCACAAGAGATGGAAGTGTGAGTAACCTTGAATGAAAACGTG  
GGACAGAGCTGCACAACCAGTGATTGAGATGAAGATGAATTGGAGAGTAGAGCTTCACCT  
GAGCCAGATCTGATCCTGAGAGATTACCAGATGGAAGTTGCAAAGCCAGCACTGAATGGG  
GAGAATATTATAATATGTCTCCCTACAGGCAGTGGTAAAACCAGAGTGGCTGTTTACATTAC  
CAAAGATCACTTGGATAAGAAGAAAAGAGCATCAGAGCCTGGAAAAGTTATAGTACTTGTT  
AATAAGGTACCATTGGTAGAACAGCATCTACGAAAGGAGTTTAATCCATTCTGAAGCGTT  
GGTATCAGGTTATTGGTTTAAGTGGTGATTCTCAGCTGAAAATCTCATTTCTGAAGTTGTC  
AGTAGAAATGATGTCATCATCAGTACAGCACAGATCCTTGAGAATTCAGTTAAATGCAGC  
CGAAGAAGATGAAGAAGGTGTCCACTTATCAGATTTTTTCACTCATCATTATCGATGAGTGT  
ATCACACTCAAAGGAAGGTGTCTACAACAATATAATGCGACGTTACTTAAAAGAAAAGATG  
AAGAACAGGAAGCTGGCAAAGAGAACAAACCACTGATCCACAGCCTCAGATTCTGGGA  
CTTACAGCCTCACCTGGTGTAGGAGGTGCAACATCCTACTCAAAGCTGAAGAACATATTC  
TGAAAATCTGTGCCAATCTTGATGCATGTAGAATCATGACTGTTGAAGAGCATGCCTCCCA  
GTTGAAGAATCAGGTGAAGGAACCTTATAAGAAGACTGTGATTGCAGATGACAAAAGAAGA  
GATCCATTTAGAGAGAGAATTACTGAGATCATGACAGACATTCAAACCTATTGCCAGCTCCA  
TCCAAAATCTGAGTTTGGAACTCAGACATATGAACAGTGGGTGATTAGAGAAGAGAGAAAA  
GCTGCAAAAGAAGAAAAACGCAAGGAACGTGTCTGTGCAGAACACTTGAAGAAATACAATG  
ATGCTCTCCAGATAAATGACACCATCCGAATGGTGGATGCGTACAATCACCTAAATAACTTT

TATAAGGAGGAGAAAAAGTAAGAAAACAGTAAGGAGTGATGATGATGATGATGAACCAGCAG  
TATCAAAACAGGATGAAACAGATGAATTTCTAATAGGTTTATTTTCATGCAAAAAAGAAACAG  
CTGAAAGAATTGGCTAGAAAAGCCAGAATACGAAAATGAGAAGCTAATACAGTTGCGAAAGA  
CTCTGATGGAGGAGTTCACGAAGACTGAGGAACCTAGAGGAATTATTTTCACAAAGACTCG  
GCTAAGTGCCTTTGCTCTATTGCAGTGGATTAAGGATAACCCAAAATTTGAAGAAGTGGA  
ATTAAGGCCAGTTATCTTATTTGTGCTGGACCTAACAGTGAAATTAACCCATGACTCAGAA  
TGAGCAAAGGGAAGTTATTGATAAATTCCGAGGTGGAATGTAAATTTACTTATTGCTACTA  
CTGTAGCTGAGGAAGGCCTAGACATCAAAGAGTGTAACATCGTTATTCGCTATGGCCTCGT  
CACCAATGAAATTGCTATGGTGCAGGCTCGTGGTCGAGCTCGAGCTGATGAGAGCACCTA  
TGCACTTGTGGCTTCGAGTGGCTCAGGAGCTGTTGAACGTGAAGATGTTAATAATTTCCGT  
GAGAAAATGATGTATAAGGCCATTGAGCGTGTCCAGAAGATGCCGCAGGAAGAGTATTTAA  
ATAAGATACAGAATTTCCAGTTGCAAAGTATAGTGGA AAAACAAATGAAGGCAAAGAGAGA  
TCGGCACAAGACATACAAGAAAAATCCTTCACTAATAACATTCCTATGCAAAAATTGCCACA  
AGCTGGTATGTTCTGGAGAAGACATACAAGTTATTGAAAACATGCATCATGTCAGTGTGAAA  
AAAGATTTCCAAAGTCTTTACCATACAAGAGAAAATAAGACACTGCAAGATAAGCATGCCGA  
TTACCAGACAAATGGGGAAATTATATGTAAAGATTGTGGACAAGCTTGGGGAAATATGATG  
GTTACCCGAGGCCCTTGACCTGCCTTGTCTAAAGATTAGAAAATTTGTGGTTGTGTTTGAAGA  
CAAGAAAACAACAAAGCATATTTTTAAGAAATGGGGAGAACTGCCTGTCAGGTTCCCTAGT  
TTTGATTATGCAGCTCATTGTCCTTCAAGTGATGAAGATTAA

>pyrrhura\_perlata-mda5

ATGGCAGAGGACTTGCGAGACGAGCGGTTCTCTACATGATCTCGTGCTTCAGGCCGCGG  
CTGAAGCAGTTCATCCGAGTGACGCCGGTGCTGGACCGGCTCCCTTCGCTCAGCGCGGA  
CGACAGGGAGAAGGTGCGGGCGGCCGCGCTGCAGCGGGGCGAGGTGGAAGGGGCGGA  
GGAGCTGCTGCGGGCCGTGGAGCGCGGGCCCCGCGGGTGTGGCTGGTTCCACGAGTTC  
TTGCAGGCGCTGGAGCATGGCGGCTGCGGCATGGCCGCTTGCTACGTGAACCCAGCCT  
CAGCCAGCTGCCCTCGCCGGCTGAGGAGGCCGACCACGACCTCTGCGTGCATTTGGTGC  
AGCTGCTCCATAGCACGCTCGTGGATAGTATGCGGACCGTGACAGGTGGCCGAGAAGTGC  
CTGCAGATGGGCATCTTCCAGGATGAGGACCTGGATGGGATCCATACTGTTACTGAGAAT  
CGTGGGAACAGAGAAGGTGCAAGGGAGCTATTGAGCAGATTAGTGCAGAAGAAAGATTGG  
TTCTCTCGTTTTTTGATTGCTCTGCGTGAAACCCAACATGGAGGCCTTGCTGATGATTTAAG  
TGGAATACAGGAGGAACAAAGGATAAACA AAAATGGGATGAAGAACAGTACAAACAAGAA  
ATAGAAGTTACAAGCCAACCAGGTTATGCCATACTGGAGGATTTGAAGCAGCAGGAAAATA  
TGAATGATAGTTTCAGCAGTGAGAACAAATTTATTGGAAACATCTATTGGAAAGAATTCTTTA  
GTTTCAGAGTCAGATGTCTCTATAGGATTTGGAAGTGTGAGTAACTTGAATGAAAACCTGG  
GACAGAGCTGCACAAGCAGTGATTCAGATGAAGAGGAGAGCAGAGCTTCACCTGAGCCAG  
ATCTGGTCCTGAGAGATTACCAGATGGAAGTTGCAAAGCCAGCACTGAATGGGGAGAATAT  
TATAATATGTCTCCCTACAGGCAGTGGTAAAACCAGAGTGGCTGTTTACATTACCAAAGATC  
ATTTGGATAAAAAGAAAAGAGCATCAGAGCCTGGAAAAGTTATAGTCCTTGTTAATAAGGTA  
CCATTGGTAGAACAGCATTTACGAAAGGAGTTTAGTCCATTCTGAAGCGCTGGTATCACA  
TTATTGGTTTAAGTGGTGATTCTCAGCTGAAAATCTCATTTCTGAAGTTGTCAGAAGAAAT  
GATGTCATCATCTGTACAGCACAGATCCTTGAGAATTCAGTCTAAATGCAGACAAAGAAG  
ATGAAGAAGGTGTCCACTTATCAGATTTTTCTACTCATCATTATTGATGAGTGTATCACACT  
CAAAAGGAAGGTGTCTACAACAACATAATGCGACGTTACTTAAAAGAAAAGAAGAAGAAC  
GGAAGCTGGCGAAAGAAAACAAACCACTGATCCCGCAGCCTCAGATTCTGGGACTTACAG



CCTCACCTGGTGTAGGAGGTGCAACATCCTATTCCAAAGCTGAAGAACATATTCTGAAAAT  
CTGTGCTAATCTTGATGCATGTAGAATCATGACTGTTGAGGAGCATGCCTCCCAGCTGAAG  
AATCAGGTGAAGGAACCTTTTAAGAAGACTGTGATTGCAGATGACAAAAAAGGATCCAT  
TTAGAGAGAGAGTAAGTGAAGATCATGACAGAGATTCAAACTATTGCCAGCTTCATCCAAAA  
TCTGAGTTTGGAAGTCAAGCATATGAGCAGTGGGTGATTAGAGAAGAGAAAAAAGCTGCAA  
AAGAAGAAAAACGCAAGGAACGTGTCTGTGCAGAACACCTGAAGAAATACAATGATGCTCT  
CCAGATAAATGATACCATCCGAATGGTAGATGCGTACAATCACCTGAATAACTTTTATAAGG  
ATGAGAAAAGTAAGAAGACAGAAAGGAGTGATGATGATGACGATGCACCAGCAGTATCAAA  
ACAGGATGAAACAGATTTATTTCTAATAGGTTTATTTTCATGCAAAAAAGAAACAGCTGAAAG  
AGTTGGCTAGAATGCCAGAATATGAAAATGAAAAGCTAACACAGTTGCGAAACACTTTAATG  
GAGGAGTTACGAAGACTGAGGCACCTAGAGGAATTATTTTCACAAAGACCCGGCTAAGT  
GCTTTTGCTCTATTCCAGTGGATTAAGGATAACCCAAAATTTGAAGAAGTGGGAATTAAGGC  
CCATTATCTTATTGTTTCTGGACATAACAGTGAAATGAAACCCATGACTCAGAATGAGCAGC  
GAGAAGTTATTGATAAATTCCGAGGTGGAAATTTGAATTTACTTATTGCTACTACTGTAGCT  
GAGGAAGGCCTAGACATCAAAGAGTGTAACATTGTTATTCGCTATGGCCTCGTCACCAATG  
AAATTGCTATGGTGCAGGCTCGTGGTCGAGCTCGAGCTGATGACAGCACCTATGCACTTG  
TGGCTTCAAGTGGCTCAGGAGCTGTTGAACGTGAAGATGTTAATATTTTCCGTGAGAAAAT  
GATGTATAAAGCCATTTCAGCATGTCCAGAAGATGCCACAGGAGGAGTATTTAAAGAAGATT  
CAGAATTACCAGTGTCAAAGTATAGTGGAAAAAGAAATGAAGGCAAAGAGACATCAGCACA  
AGACATACAAGAAAAATCCTTCACTGATATCATTCTATGCAAAAATTGCCACAAGCTGGTA  
TGTCTCTGGGGAAGACATACGAGTTATTGAAAACATGCATCATGTCAGTGTGAAAAGAGATTT  
CCAAAGTCTTTACCATACAAGAGAAAAATAAGACGCTGCAAGATAAGAATGCTGATTACCAG  
ACAAATGGAGAAGTTATATGTAAAGATTGTGGACAAGCTTGGGGAAATATGATGGTTCACC  
GAGGTCTTGATCTGCCTTGTCTAAAGATTATAAATTTTGTGATTGTGTTTGAAGACAAGAAA  
ACAAGAAACGAAATTTTAAAGAAATGGGGAGAGCTGCCCATCAAGTTCCTGGTTTTGATTA  
TGCAGCTCATTGTCTTCAAGTGATGAAGATTAA

>recurvirostra\_avosetta-mda5

ATGGCGGTGGAGTCCCGAGACGAGCGCTTCCTCTACATGATCTCCTGCTTCAGGCCGAGG  
CTGAAGCAGGTGCATACGGGTGCAGCCGGTGCTGGACCGGCTTCCTCGCTGAGCGCGGA  
GGAGCGGGAGAGGGTGCGGGCGGCCGCCGTGCAGCGGGGCGAGGTGGAGGGGGCGGA  
GGAGCTGCTGCGGACCGTGAGCGGGGCCCCCGCGGGTGCGGCTGGTTCCACGAGTTC  
CTGCAGGCGCTGGAGCACGGCGGCTGCAGCCTGGCTGCTTGCTATGTGGACCCCAACCT  
CAGCCAGCTGCCCTCGCCAGCCGAGGAGGCCGACCACGACCTCTGCGTGCACTTGGTGC  
AGCTGCTCCACAGCACGCTGGTGGATAAAATGCAGACCATGCAGGTGGCTGAGAAGTGCC  
TGCAGATGGGCATCTTCCAGGACGATGACCTGGATCGGATCCACACTGTTACTGACAGAC  
ACGGGAACAGAGATGGTGCAAGGGAGCTATTGAGCAGAATAGTGCAGAAGAAAGACTGGT  
TCTCTCCTTTTTTGAAGTGTCTTTCGCTGAAACCCAGCATGGAGACCTTGCAGATGATTTAAGC  
GGAAATACAGGAGGAACAGAGAATAGACAAAATGGAATGAAGAACAGTACAAGTGAAGAAA  
CAGAAGTTACAAGCCAACCAGGATACACTGTAGTGAAGGATTTGAAACAAGAAGAAAATGC  
GAATGATAGTTTCAGCAGTGAGAACAGTGTATTGGAAACATCTATTGGAAAGAATTCTGGA  
GTTTCAGAGTCAGATGTTTCCATAGGAGATGGAAGTGTTGGTAACTTGAATGAAAACCTGG  
GACAGAGCTGCACAACCAGTGATTCAGATGAAGATGAACTGGAGAGCAGAGCTTCACCTG  
AGCCAGATCTGATCCTGAGAGATTACCAGATGGAAGTTGCAAAGCCAGCACTGAATGGGG  
AGAATATCATAATATGTCTGCCTACAGGCAGTGGTAAAACCAGAGTGGCTGTTTACATTACC

AAAGATCACTTGGATAAGAAGAAAAGAGCATCAGAGCTTGGAAAAGTTATAGTACTTGTTAA  
TAAGGTACCGCTGGTAGAACAGCATTTACGAAAGGAGTTTAATCCGTTCCCTGAAGCGTTGG  
TATCAGGTTATTGGTTTAAAGTGGTGATTCTCGGCTGAAAATCTCATTTCCTGAAGTTGTCAG  
AAGAAATGATGTCATCATCAGTACAGCACAGATCCTTGAGAATTCACCTCTTAAATGCAGCCG  
AAGAAGATGAAGAAGGTGTCCACTTATCAGATTTTTCACTCATCATTATTGATGAGTGTCAT  
CACACTCAAAGGAAGGTGTCTACAACAATATAATGCGACGTTACTTAAAGAAAAGAGGA  
AGAACAGGAAGCTGGCAAAAGAAAACAAACCACTGATCCCACAGCCTCAGATTCTGGGAC  
TTACAGCCTCACCTGGTGTAGGAGGTGCAACATCCAACCTCAAAGCTGAAGAACATATTCT  
GAAAATCTGTGCCAATCTTGATGCACGTAGAATCATGACTGTTGAAGAGCATGCCTCCCAA  
TTGAAGAATCAGGTGAAGGAACCATATAAGAAGACTGTGATTGCAGATGACAAAAGAAGGG  
ATCCATTTAGAGAGAGAATTACTGAGATCATGAGAGACATTCAAACCTATTGCCAACTCTAT  
CCAAAATCTGAGTTTGGAACTCAGCCGTATGAGCAGTGGGTGATTAGAGAAGAGAAAAAAG  
CTGCAAAAGAAGAAAAACGCAAGGAACGTGTCTGTGCAGAACACTTGAAGAAATACAATGA  
TGCGCTCCAGATAAATGACACTATCCGAACAGTGGATGCATACAATCACCTAAACAACCTTTT  
ATAAGGAGGAGAAAAAGTAAGAAGACAGTAAGGAGTGATGATGATGATGATGATGAACCAG  
CAGTATCAAAACAGGATGAAACAGATGAATTTCTAATAGGTTTATTTTCATGCCAAAAAGAAA  
CAGCTGAAAGAGTTGGCTAGAAAGCCAGAATATGAAAATGAGAAGCTAATACAGTTGCGAA  
ACACTTTAATGGAGGAGTTCACGAAGACTGAAGAACCTAGAGGAATTATTTTCACAAAGACT  
CGGCTAAGTGCCTTTGCTCTATTCCAGTGGATTAAGGATAACCCAAAATTTGAAGAAGTGG  
GAATTAAGGCCCATTAATCTTATTGGTGCTGGACATAACAGTGAAATTAACCCATGACTCAG  
AATGAGCAAAGGGAAGTCATTGATAAATCCGAGGTGGAAGTGTAATTTACTTATTGCTAC  
TACTGTAGCTGAGGAAGGCCTAGACATCAAAGAGTGTAACATCGTTATTCGCTATGGCCTC  
GTCACCAATGAAATTGCTATGGTGCAGGCTCGCGGTGCAGCTCGAGCTGATGAGAGCACG  
TATGCACTTGTGGCTTCAAGTGTCTCAGGAGCTGTTGAACGTGAAGATGTTAATATTTTCCG  
TGAGAAAATGATGTATAAGGCCATTGAGCGTGTCCAGAACATGCCGCAGGAAGAGTATTTA  
AAGAAGATTCAGAATTTGCAGTTGCAAAGTATAGTGGA AAAACAAATGAAGGCCAAAGAGAG  
ATCAGCACAAAGACATACAAAAAAATCCTTCACTAGTAACATTCCATTGCAAAAATTGCCAC  
AAGCTGGTATGTTCTGGAGAAGACATACAAGTTATTGAAAACATGCATCATGTCAAGTGTGAA  
GAAAGACTTCCAAACTCTTTACAATACAAGAGAAAATAAGACGCTGCAAGATAAGCATGCC  
GATTACCAGACGAATGGGGAAATTATATGTAAAGATTGTGGACAAGCTTGGGGAAATATGA  
TGGTTACCGAGGTCTTGACCTGCCATGTCTAAAGATTAGAAATTTTGTGGTTGTGTTTGAA  
GACAAGAAAACAACAAAGCACATTTTTTAAGAAATGGGGAGAACTGCCTGTCAGGTTTCCTA  
GTTTAGATTATGCAGCTCATTGTCCATCAAGTGATGAAGATTAA

>rhea\_america-mda5

ATGTCCGACGAGTCCCGAGCCGAGCGCTTCCTCTACTTGATCTCCTGCTTCAGGGCGCGG  
CTGAAGCGCGCCATCCGCGTGCAGCCCGTGTTGGACTGGCTGCCCTCGCTGGACGCCGA  
GGAGCGGGAGCGGGTGCGGGCGGCGGCGCTGCAGCAGGGCGAGGTGGAGGCGGCGGA  
GCTGCTGCTGCGCGCCGTGGAGCGGGGGCCCCGCGACTGCTTCCCCGAGTTCCTGCAG  
GCGCTGGAGCGCGGCGGCTGCGGCCTGGCCGCCTGCTACGTGAACCCACGCCTGAGCC  
AGCTGCCCTCGCCGGCGGAGGAGGCCACCGACTTGTGCGTGCATTTGGTGCAGCTG  
CTGCACGGCACGCTGGTGGATAACATGCGGGCCGTGCAGGTGGCCGAGAAGTGCCTGCA  
GAGGGGCATCTTCCAGGTGAGGACCTGGAACGGATCCAGACTGTTACTGAAAGTCGTGG  
GAATAGAGATGGTGAAGGGAGCTGTAAAGTAGAATAGTTCAGAAGAAGGACTGTTCTCC  
CCTTTTTTGGTTGTTTTGCGTGAAACCCAACATGAAGACCTTGCAGATGATTTAAGTGAAA

TACAGGAGGAGTGGAAAATGGAGAAAATGGGATGAATAACAGGACAAATGAAGAAACAGA  
AGTCACAAGACAATCAGAACATGCTGGAGTGGAGGATTTCAAACAGCAAGAAAATATGAAT  
GACAGTTTAGCCAGTGAGAGCAGTGTGTTGGAAAGATCTGTTGGAGAGAATTCTGTAGCTT  
CAGAGTCTGATGTCTCTATAGGAGATGGAAGTGTCAATAATGTGAATGAAAACCTGGGACA  
GAGCAGCAGCACAAACCAGTGATTGAGATGAAGATGAAGTGAAGAGCAGAGCTTCACCTGA  
GCCAGAACTGATCCTGAGAGATTACCAGATGGAAGTTGCAAACCCAGCATTGAATGGGGA  
GAATATTATAATATGTCTCCCTACAGGCAGTGGTAAAACCAGAGTGGCTGTTTATATTACCA  
AAGATCATTGATAAGAAGAGAAGAGCATCAGAGCCTGGAAAAGTTATAGTACTTGTTAA  
CAAGGTACCATTGGTGGAACAGCATTTACGAAAGGAGTTTCATCCATTCTGAGGCGCTGG  
TATCAGGTTATTGGTTTAAGCGGTGATTGTCAGCTGAAAATCTCATTTCTGAAGTTGTCAG  
AAGAAACGATGTCATAATCAGTACAGCACAGATCCTGGAGAATTCAGTCTAAATGCAACT  
AAAGAAGAAGAGGAAGGTGTCCGTTTATCAGATTTTTCACTTATCATTATTGATGAATGTCA  
TCACACTCAAAGGAAGGTGTCTACAACAATATAATGCGACATTACTTAAAAGAAAAGATGA  
AGAATGAGAAGCTGGCGAAAGAAAACTACTCATTCCACAACCTCAGATTCTGGGACTTAC  
AGCCTCACCTGGTGTAGGAGGTGCAACATCCTATTTGAAAGCTGAAGAACATATTCTGAAA  
ATCTGTGCAAACCTTGATGCATGTAGAATCATGACTGTTGAAGAGCATGCCTCCCAACTGA  
GGAATCAGGTGAAGGAACCATATAAGAAGACTGTGATTGCAGATGACAAAAGAAGGGATC  
CATTTAGAGAGAAAATTATCGAGATCATGACAGAAATTCAAAAGTATTGCCAGCTCCATCCA  
AAATCTGAGTTTGAACTCAGCCATATGAACAGTGGGTGATTAGAGAGGAGAAGAAAGCG  
GCAAAGAAGAAAAACGCAAGGAACGTGTCTGCGCAGAACACTTGAAGAAATACAACGAT  
GCTTTGCAAATAAATGACACTATTGGAATGGTTGATGCATACAATCACCTATGTAACTTTTAT  
AAGGAGGAAAAAAGTAAAAAACAATAGTGAGTGATGATGAGGATGAACCAGCAGTATCAA  
AACAGGATGAAACAGATGAATTTCTAATAGGTTTGTGTTATGCAAAAAAGAAACAGCTGAAA  
GAGTTGTCTGAAAACCTGAATATGAAAATGAGACACTAACAAAGTTGCGCGACACCTTAA  
TGGAGGAGTTCACGAAGACTGATGAACCAAGAGGAATTATTTTACAAAGACGCGGCAAAAG  
TGCTTTTGCTCTGTTTCAGTGGATTAAAGATAACAAAAAATTTGAAGAAGTGGGAATTAAGG  
CCCATTATCTTATTGGTGCTGGAAACAACAGTGAACTAAAGCTATGACTCAGAATGAGCA  
GAGGGAAGTCATTGGTAAATCCGAGATGGAAGTGTAACCTTACTCATTGCTACTACTGTA  
GCTGAGGAAGGCTTGGACATCAAGGAGTGTAACATTGTTATTCGCTATGGCCTTGTCACCA  
ATGAAATTGCTATGTTGCAGGCCCGTGGTCGAGCTCGAGCTGATGAGAGCACCTATGCAC  
TTGTGGCTTCAAGCAACTCAGGAGCAGTTGAACGTGAGGATGTTAATAGCTTCCGTGAGAA  
AATGATGTATAAGGCGATTGAGCGTGTCCAGAAGATGCCACGGAAAGAGTACTTAAACAAG  
ATTCAGACCTTCCAGTTGCAAAGTATAATGGAAAAAATGAAGACAAGGAGAGATCAAT  
GTAAGACATATACGAAAAGACCTTCACTAATAAAATTTCTTATGCAAAAATTGCTGCAAGTTG  
GTATGTTGAGGAGAAGATATACAAGTTATTGAAAACATGCATCATGTCAGTGTGAAAAAAGA  
TTTCAAAGCCTTTACCATACCAGAGAAAAATAAGACATTGCAAGATAAACATGCTGATTACC  
AGACAAATAGAGAAATTACATGTAAAGACTGTGGACAAGCTTGGGGAAATATGATGGTTCA  
CCGAGGTCTTGACCTGCCTTGTCTAAAGATTAAAAATTTTGTGGTTGTGTTTGAAGACAAGA  
AAACAACAAAGCAAATTTTAAAGAAATGGGGAGAACTGCTAGTCAGGTTCCCTGGTTTTGAT  
TATGCAGGGCATTGTCCTTCAAGTGATGAAGATTAA

>saxicola\_maurus-md5

ATGGCAGAGGGCACCCGGGACGAGCGGTTCTCTACATGATCTCGTGCTTCAGGCCGCG  
GCTGAAGCAGTTCATCCAGGTGCAGCCCGTGCTGGACCGGCTGCCCTCGCTGAGCGCCG  
AGGACCGGGACAGGGTGCGGGCGGCCGCCGAGCAGCGCGCGCGCGCGGGCGCGCGG

AGGAGCTGCTGCGGGCCCTGGAGCGCGGGCCCCGCGGCTGCGGCTGGGGCCGCGAGTT  
CCTGCAGGCGCTGGAGCAGGGCGGCTGCGGCCTGGCCGCCTGCTACGCCAACCCCAGC  
CTGAGCCTGCTGCCCTCGCCCCGCCGAGGAGGCCGAGCACGACCTGTGCGTGCAGCTGGT  
GCAGCTGCTGCACGGCACGCTGGTGGACAGGATGCGCGCCCTGCAGGTGGCCGGGAAG  
TGCCTGGAGATGGGAATCTTCCAGGACGAGGACATGGATCGGATCCAGACTGTTACTGAC  
AATCGTGGCAACAGAGATGGTGAAGGGAGCTACTGAGCAGAATAGTCCAGAAGAAAAAT  
TGGTTCTCTTCTTTTTTGGTTGCTCTCCGTGAAACCCAACATGAAGACCTCGCATGTGATTT  
AAGTGGAAATACAGGAGGAACAGAGAATAAACAAAATGGGATGGAGCAGACTACANATGA  
AGAAACAGAAGTTACAAGTCAACCAGGATATGCCATAGAGCAGAATTTGAAACAGAAAGAA  
AATGTGGATGATAGTTTCAGCAGTGAGAGCAGTGTGTTGGAACATCCATAGAAAATAATT  
CTGTGGTGTGAGAGTCAGATGTCTNCACAGGAGATGGAAGTAACTTGAATGAAAGCCTGG  
GACAGAGCTACACAACCAGTGATTCAGATGAAGAGGAGAGGAGAGCCTCACCTGAGCCAG  
ATCTGACCCTGAGAGATTACCAGATGGAAGTTGCAAAGCCAGCACTGAATGGAGAGAATAT  
TATAATATGTCTCCCTACGGGCAGTGGTAAACTAGAGTGGCTGTTTACATTACCAAAGATC  
ACTTGGATAAGAAGAAAAGAGCATCAGAGCCTGGAAAAGTCATAGTACTTGTTAATAAGGT  
TCCATTGGTAGAACAGCATTTACAAAGAGAGTTTAGTCCATTCCTGAAGCGTTGGTATCAG  
GTTACTGGTTTAAAGTGGTGAATTCTCAGCTGAAAATCTCATTTCTGAAGTTGTCAGAAGAAA  
TGATGTCATCATCTGTACAGCACAGATCCTTGAGAATTCAGTGTAAATGCATCCAAGGAAG  
AGGAAGAAAGTGTCCACTTATCAGATTTTTCCCTCATCATTATCGATGAGTGTATCACACT  
CAAAAGGAAGGTGTCTACAACAATATAATGCGACGTTACTTAAAAGAAAAGATGAAGAACA  
GGAAGCTGGCAAAAGAAAACAAACCACTGATCCCACAGCCTCAGATTCTGGGACTTACAG  
CCTCACCTGGTGTAGGAGGTGCAACATCCTACTCAAAGCTGAAGAGCATATTCTGAAAAT  
CTGTGCCAATCTTGATGCATGTAGAATTATGACTGTTGAAGAGCATGCATCCCAGCTAAAG  
AATCAGGTGAAGGAACCATCTAAAAAGACTGTGATTGCAGATGACAAAAAAGGGATCCAT  
TTAAAGAGAGAATTATTGAGATCATGACAGAAATACAAAATATTGCCAGCTACATCCAAAG  
TCTGAGTTTGGAACTCAGACATACGAACAGTGGGCGATCAGAGAAGAGAGAAGAGCTGCA  
AAAGAAGAAAAACGCAGGGAACGTGTCTGTGCAGAACACTTGAAGAAATACAATGATGCTC  
TCCAGATAAATGACACCATCCGAATGGTGGATGCCTACAATCACCTAAATAACTTTTATAAA  
GAGGAGAAAAAGTAAGAAGACAGTAAGGAGTGATGATGATGATGATGAACCAGCAGTAT  
CAAAACAGGATGAAACAGATGAATTTCTATTAGATTTATTTTCATGCAAGAAAGAAACAGCTG  
AAAGAGTTGACTAGAAAGCCAGAAAATGAAAATGAGAAGCTAATAAAGTTGAGAAACACTTT  
AATGGAGGAGTTCACAAANACTGAGGAACCTCGAGGAATCATTTTCACAAAGACTCGTCTA  
AGTGCCCTTTGCTCTATTCCAGTGGATTGAGGACAACCCAAAATTTGAAGAAGTGGGAATTA  
GGGCCCATTTATCTTATTGGCTCTGGACACAAGAGTGAAATGAAGCCCATGACTCAGAATGA  
GCAAAGGGAAGTTATTGATAAATTTGACATGGAAATATAAATTTACTAATTGCTACTACTGT  
AGCTGAGGAAGGCCTGGACATCAAAGAGTGCAACATAGTTATTTCGCTATGGCCTCGTCAC  
CAATGAAATTGCTATGGTGCAGGCTCGCGGTAGAGCTCGGTCTGATGAAAGTACCTATGCT  
CTTGTGGCTTCAAGTGGCTCAGGGGCTGTTGAACGTGAAGATGTTAATATTTATCGTGAGA  
AAATGATGTACAAGGCCATCCAGCGTGTCCAGAAGATGCCACAGGAAGAGTATTTAAATAA  
GATTCAGAGTTTCCAGTTGCAAAGTATAGTGGAAAAACAAATGAAGGCAAAGAGAGATCAG  
TGCAAGACATACAAGAAAAATCCTTCACTAATAAAAATTTCTTATGCAAAAATTGCTACAAGCC  
GATATGTTCTGGAGAAGACATACAAGTTATTGAAGACATGCATCATATCAGTGTGAAAAAG  
ATTTCCAAAGTCTTTATCATACAAGAGAAAATAAAACACTGCAAGATAAGCATGCTGATTAC  
CAGACAAATGGGGAAATTATATGCAAAGACTGTGGACAAGCTTGGGGAAATATGATGATTC

ACCGAGGTCTTGACCTGCCTTGTCTAAAGATTAAAAATTTTGTGGTTGTGTTTGCAGACAAG  
AAAACAACAAAGCAAATTTTTAAGAAATGGGGAGAGCTGCCCATCAGGTTTCCTAGTTTTGA  
TTATGCAGCTCATTTCCTTCAAGTGATGAAGATTAA

>scolopax\_mira-mda5

ATGGCAGAGGATTGCCGAGACGAGCGGTTCTCTACATGATCTCTTGCTTCAGGCCGCGG  
CTGAAGCGTTTCATCCAGGTGCAGCCGGTGCTGGACCGGCTTCCCTCGCTGAGCGCGGA  
GGAGAGGGGAGAAGGTGCGGGCAGCCGCCAGCAGCGCGGTCAGGTGGAGGGGGCGGA  
GGAGCTGCTGCGGGCCGTGGAGCGGGGTCCCCGCGGATGCGGCTGGTTCCACGAGTTTT  
TGCAGGCTCTGGAGTACGGCGGCTGCAGCCTGGCTGCCTGCTACGTGAACCCAGCCTC  
AGCCTGTTGCCCTCGCCGGCTGAGGAGGCCGACCATGATCTCTGTGTGATTTAGTGCAG  
CTGCTCCACGGCACACTGGTGGATAAAATGATGCCCAGGCAGGTGGCTGAGAAGTGCCTG  
CAGATGGGCATCTTTCAGGACGACGACCTGGATCGGATCTGCACTGTTACTGACAATCGT  
GGGAACAGAGACGGTGCAAGGGAACCTATTGAGCAGAATAGTGCAAAGAAAGATTGGTTC  
TCTCCTTTTTTGGTTGCTTTGCGTGAAACACAACATGGAGACCTTGCAGATGATTTAAGTGG  
AATTACAGGAGGAACAGATACTAGACAAAATGGGATGAACAATACAAATGAAGAAACAGAA  
GTTGCAAGCCAACCAGGATATGCTGCAGTAGAGGATTTGAAACAGCAAGAAAATGTGAATG  
ATGGTTTCAGCAATGAGAACACTGCATTGGAACATCTATGGGAAATAATTCTGTGATTCCA  
GAGTCAGATGTCTCCATAGGAGATGCAAGTGTCAAGTAACTTCAATGAAAACCTGGGACAGA  
GCTGTTCAACCAGTGATTCAGATGAAGATGAAGTGGAGAGCCAAGTTTCACCTGAGCCAGA  
TCTGACCCTGAGAGACTACCAGATGGAAGTTGCAAAGCCAGCACTGAATGGGGAGAATAT  
CATAATATGTCTGCCTACAGGCAGTGGTAAAACCAGAGTGGCTGTTTACATTACCAAAGAT  
CACTTGGATAAGAAGAAGAGAGCATCAGAGCCTGGAAAAGTTATAGTACTTGTTAATAAGG  
TACCATTGGTAGAACAGCATTTACGAAAGGAGTTTAGTCCATTCTGAAGCGTTGGTATCG  
CGTTACTGGTTTAAAGTGGTGATTCTCAGCTGAAGATCTCATTTCTGAAGTTGTCAGAAGAA  
ATGATGTCATCATCAGTACAGCACAGATACTTGAGAATTCAGTGTAAAGTGCAGCTGAAGAT  
GATGAAGAAGGTGTCCACTTATCAGATTTTTCACTCATCATTATTGATGAGTGTATCACAC  
ACAGAAGGAAGCTGTCTACAACAATATAATGCGACGTTACTTAAAAGAAAAGAGGAAGAAC  
AGGAAGCTGGCAAAAAGAAAACAAACCACTGATCCCACAGCCTCAGATTCTGGGACTTACAG  
CCTCACCTGGTGTAGGAGGTGCAAAATCTAACTCAAAGCTGAAGAACATATTCTGAAAAT  
CTGTGCCAATCTTGACGCGCATAGAATCATGACTGTAAAGAACATGCTTCCAGTTGAAG  
AATCAGGTGAAGGAACCATATAAGAAGACTGTGATTGCAGATGACAACAGAAGGGATCCAT  
TTAGAGAGAGAATTACTGAGATCATGAGAGAGATTGAGAACTATTGCCAGTTCCATCCAAAA  
TCTGAGTTTGGAAGTACGCCATATGAACAATGGGTGATTAGAGAAGAGAAAAAGCTGCAA  
AAGAAGTAAAACGCAAGGAACGTGTCTGTGCAGAACACTTGAAGAAATACAATGATGCTCT  
CCAGATAAATGACACCATCCGAATGGTGGATGCGTACAATCACCTAAATAACTTTTACAAG  
GAGGAGAAAAAGTAAGAAGACAGTAAGGAGTGATGATGATGATGAACCAACAGTATCAA  
AACAGGATGAAACAGATGAATTTCTAATAGGTTTATTTTCATGCAAAAAAGAAACAGCTGAAA  
GAGTTGGCTAAAAAGCCAGAATATGAAAACGAGAAGCTAATACAGTTGCGAAACACTTTAA  
TGGAGGAGTTCACGAAGACGGAAGAGCCTAGAGGAATTATTTTCACAAAGACTCGGCTAA  
GTGCCTTTGCTCTTTTCCAGTGGATTAAGGATAACTCAAATTTGAAGAAGTGGGAATTAAG  
GCCCATTACCTTATTGGTGCTGGACACAACAGTGAAATTAAGCCCATGACTCAGAATGAGC  
AGAGGGAAGTCATTGATAAGTTCCGAGGTGGAAGTATAAATTTACTTATTGCTACTACTGTA  
GCCGAGGAAGGCCTAGACATCAAAGAGTGTAACATCGTTATTCGCTATGGCCTCGTCACCA  
ATGAAATTGCTATGCTGCAGGCTCGCGGTGAGCTCGAGCTGATGAGAGCACCTACGCAC

TTGTGGCATCGAGTGCCTCAGGAGCTGTTGAACGTGAAGATGTTAATATTTTCCGTGAGAA  
AATGATGTATAAGGCCATTGAGCGTGTCCAGAACATGCCACAGAAAGACTATTTAAATAAGA  
TTGAGAATTTGCAGTTGCAAAGTATAGTGGAAAAACAAATGAAGGCAAAGAGAGATCAGCA  
CAAGACATACAACAAAAATCCTTCACTAGTAACATTCCTATGCAAAAATTGCCACAAGCTGG  
TATGTTCTGGAGAAGACATACAAGTTATTGAAAACATGCATCATGTCAGTGTGAAAAAGGAC  
TTCCAAAGTCTTTACCAACAAAAAGAAAATAAGACACTGCAAGACAAGCATGCCGATTACCA  
GACAAATGGGGAAATTATATGTAAACAATGTGGACAAGCTTGGGGAAATATGATGGTTCAC  
CGAGGTCTTGACCTGCCTTGTCTAAAAATTAGAAATTTTGTGGTTGTGTTTGAAGACAAGAA  
AACAAACAAAGCACATTTTAAAGAAATGGGGGAGAACTGCCCATCAGGTTCCCTAGTCTTGATT  
ATGCAGCTCATTGTCCTTCAAGTGATGAAGATTAA

>serinus\_canaria-md5

ATGGCAGAGGGGCACCCGGGACGAGCGGTTCTCTACATGATCTCCTGCTTCAGGCCGCG  
GCTGAAGCAGTTCATCCAGGTGCAGCCCGTGCTGGACCGGCTCCCCTCGCTGAGCGCGG  
AGGACAAGGACAGGGTGCGTGCGGCCGCCCTGCAGGGGGGCGCGGCGGGCGGGCGCGG  
AGGAGCTGCTGCGGGCCGTGGAGCGGGGGCCCCGCGGCTGCGGCTGGATCCGCGAGTT  
CCTGCAGGCGCTGGAGCATGGAGGCTGCAGCCTGGCCGTCTGCTACGCCAACCCAGCC  
TGAGCCAGCTGCCCTCGCCGGAAGAGGAGGCCGAGCACGACCTCTGCGTGCACCTGGTG  
CAGCTGCTGCACGGCACGCTGGTGGACAGGATGCGCACCGTGCAGGTGGCCGAGAAGTG  
CCTGCAGATGGGAATCTTCCAGGACGAGGACGTGGATCGGATCCAGACTGTTACTGACAA  
TCGTGGGAACAGGGATGGTGAAGGGAGCTACTGAGCAGAATAGTCCAGAAGAAAGACTG  
GTTCTCGTCTTTTTTGGTTGCTCTCCGTGAAACGCAACATGAAGACCTTGCCGATGATTTAA  
GTGGAAATACAGGAGAGAATAAAGAAAAATGGGATGGAGCAGACTACGAATGAAGAAACAG  
AAGTTCCAAGCCAACCAGGATACGTCACAGAGGAGAATTTGAAACAGGAAGAAAAATGTGGA  
TGATAGTTTTGAGCAGTGAGAGCAGTCTGTTGGAACATCCATAGAAAAGAATTCTGTGATG  
TCAGAGTCAGATGTCTCCATAGGAGATGGAAGTGTGAGTAACTTGAAGGGAAACCTGGAA  
GAGAGTTGCACAACCAGTGATTGAGATGAAGTGGAGAGGAGAGCCTCACCTGAACCAGAT  
CTGACCCTGAGAGATTACCAGATGGAAGTTGCAAAGCCAGCCTTGAATGGGGAGAATATTA  
TCATTTGTCTCCCTACAGGCAGTGGTAAAACAGAGTGGCTGTTTACATTACCAAAGATCA  
CTTGGATAAGAAAAAAGAGCATCAGAGCCTGGAAAAGTCATAGTACTTGTTAAACAAGGTT  
CCATTGGTAGAACAGCATTTTAAAAGAGAGTTTAGTCCATTCTGAAGCGTTGGTATCAGG  
TTATTGGTTTAAAGTGGTGATTCTCAGCTGAAAATCTCATTTCTGAAGTTGTGAGAAGAAAT  
GATGTCATCATAAGTACAGCACAGATCCTTGAGAATTCAGTGTAAATGCGTCCAAGGAAG  
ATGAAGAAAGTGTCCACTTATCAGATTTTTCCCTCATCATCATCGATGAGTGTATCACACT  
CAAAAGGAAGGTGTCTACAATAATATAATGAGACGTTACTTAAAAACAAAAAAGAAGACGT  
GAAGCTGGCAAAGAAAAACAAACCACTGATCCACAGCCTCAGATTCTGGGACTTACAGCC  
TCACCTGGTGTAGGAGGTGCAACATCCTACTCAAAGCTGAAGAGCATATTCTGAAAATCT  
GTGCCAATCTTGATGCATGTAGAATTATGACTGTTGAAGAGCATGCCTCCAGCTAAAGAA  
TCAGGTGAAGGAACCATCTAAGAAAATTGTGATTGCAGATGATAAAAAAAGGGATCCATTTA  
AAGAGAAAATTACTGAGATCATGACAGAAATACAAAATATTGCCAGCTGCATCCGAAGTCT  
GAGTTTGGAACTCAGACATATGAACAGTGGGTGATCAGAGAAGAGAGAAGAGCTGCGAAA  
GAAGAAAAACGCAGGGAACGTGTCTGTGCAGAGCACTTGAAGAAATACAACGATGCTCTC  
CAGATAAATGACACCATCCGAATGGTGGATGCCTACAATCACCTAAATAACTTCTATAAAGA  
GGAGAAAAGTAAGAAGACAGTAAGGAGTGATGATGATGATGATGATGAACCAGCAGTATCA  
AAACAGGATGAAACAGATGAATTTCTAATAGGTTTATTTTCATGCAAAAAAGAAACAGCTGAA

AGAGTTGACTACAAAGCCAGAAAATGAAAATGAGAAGCTAACGAAGTTGAGAAATACTTTAA  
TGGAGGAGTTCACAAAGACTGAAGAGCCTCGAGGAATCATTTTCACAAAGACTCGTCTAAG  
TGCCTTTGCTCTATTCCAGTGGATTAAGGAAAACCCAAAATTTGAAGAAGTGGGAATCAAG  
GCCCATTATCTTATCGGCTCTGGACACAAGAGTGAAATGAAGCCCATGACTCAGAATGAGC  
AAAGGGAAGTTATTGATAGATTTTCGATGTGGAAATGTAAATTTGCTAATTGCTACTACTGTA  
GCTGAGGAAGGCCTGGACATCAAAGAGTGTAACATCGTTATTCGCTATGGCCTCGTCACCA  
ATGAAATTGCTATGGTGCAGGCTCGTGGTAGAGCTCGAGCTGATGAAAGCACCTATGCTCT  
TGTGGTTTCAAGTGGCTCAGGGGCTGTTGAACATGAAAATGTTAATATTTTTTCGTGAGAAAA  
TGATGTATAAGGCCATTACGCGTGTCCAGAAGATGCCACAGGAAGAGTATTTAAAAAAGAT  
TCAGAGTTTCCAGTCGCAAAGTATAGTGGA AAAACAAATGAAGGTGATGAGAGATCAGCGC  
AAGACATACAAGAAAAATCCTTCACTAATAAAATTCTTATGCAAAAATTGCTCCAAGCCGAT  
ATGTTCTGGAGAAGACATACAAGTTATTGAAGACATGCATCATGTGAGTGTGAAAAAAGATT  
TCCAAAGTCTTTATCATACAAGAGAAAAATAAATCACTGCAAGATAAGCGTGCTGATTACCCG  
ACAAATGGGGAAATTATATGCAAAGACTGTGGACAAGCTTGGGGACATATGATGGTTCACC  
GAGGTCTTGACCTACCTTGTCTGAAGATCAGAAATTTTGTGGTTGTGTTTGCAGACAAGAAA  
TCAACGAACAATATTTTTAAGAAATGGGGAGAGCTGCCCATCAGGTTTCCTAGTTTTGATTA  
TGCAGCTCACTGTCTTCAAGTGATGAAGATTAG

>setophaga\_coronata-mda5

ATGGCAGAGGGCACCCGGGACGCGCGGTTCTCTACATGATCTCCTGCTTCAGGCCGCG  
GCTGAAGCAGTACATCCAGGTGCAGCCCGTGCTGGACCGGCTGCCCTCGCTGAGCGCGG  
AGGACCGGGACAGGGTGCGTGCGGCCGCCCTGCAGCGGGGCGCGGCGGCGGCCGCG  
AGGAGCTGCTGCGGGCCGTGGAGCGGGGGCCCCGCGGCTGCGGCTGGATCCGCGAGTT  
CCTGCAGGCGCTGGAGCACAGCGGCTGCAGCTTGCCGTCTGCTACGCCAACCCAGCC  
TCAGCCAGCTGCCCTCGCCGGCAGAGGAGGCCGAGCATGACCTCTGCGTGCACCTGGTG  
CAGCTGCTGCACGGCACGCTGGTGGACAGGATGCGCGCCGGGCAGGTGGCCGAGAAGT  
GCCTGCAGATGGGAATCTTCCAGGACGAGGACGTGGATCGGATCCAGACTGTTACTGACA  
ATCGTGGGAACAGAGATGGTGCAAGGGAGCTACTGAGCAGAATAGTCCAGAAGAAAGACT  
GGTTCTCTTCTTTTTTGATTGCTCTCCGTGAAACCCAACATGAAGACCTTGCAGATGATTTA  
AGTGGAATAACAGGAGAGAATAAAACAAAGTGGGATGGAGCAGACTACGAATGAAGAAACA  
GAAGTTACAAGCCAACCAGGATACGTCATAGAGGAGAATTTGAAACAGGAAGAAAATGTGG  
ATGATAGTTTCAGCAGTGAGAACAGTCTGTTGGAAACATCTATAGAAAAGAATTCTGTGATG  
GCAGACTCAGATGTCTCCATAGGAGATGGAAGTGTGAGTAACCTGAATGGAAACCTGGAAC  
AGAGTTGCACAACCAAGTGATTCAGATGAAGTTGAGAGGAGAGCCTCACCTGAGCCAGATC  
TGACCCTGAGAGATTACCAGATGGAAGTTGCAAAGCCAGCATTGAATGGGGAGAATATTAT  
CATATGTCTCCCTACAGGCAGTGGTAAAACGAGAGTGGCTGTTTACATTACCAAAGATCAC  
TTGGATAAGAAGAAAAGAGCATCAGAGCCTGGAAAAGTCATAGTACTTGTTAATAAGGTTT  
CATTGGTAGAGCAGCATTTAAAAAGAGAGTTTATTCCATTCTGAAGCGCTGGTATCAGGTT  
ATTGGTTTAAGTGGTGATTCTCAGCTGAAAATCTCATTTCTGAAGTTGTCAGAAGAAATGA  
TGTCATCATCAGTACAGCACAGATCCTTGAGAATTCAGTGTAAATGGATCCAAGGAAGAT  
GAAGAAAGTGTCCACTTATCAGATTTTTCCCTCATCATCATCGATGAGTGTATCATACTCA  
AAAGGAAGGTGTCTACAATAACATAATGCGACGTTACTTAAAAGAAAAGATGAAGAACAGG  
AAGCTGGCAAAAAGAAAACAAACCACTGATCCACAGCCTCAGATTCTGGGACTTACAGCCT  
CACCTGGTGTAGGAGGTGCAACATCCTACTCAAAGCTGAAGAGCATATTCTGAAAATCTG  
TGCCAATCTTGATGCATGTAGAATTATGACTGTTGAAGAGCATGCCTCCCAGCTAAAGAAT

CAGGTGAAGGAACCGTCTAAGAAGACTGTGATTGCAGATGACAAAAAAGGGATCCATTTA  
AAGAGAGAATCACTGAGATCATGACAGAAATACAGAACTATTGCCAGCTGCATCCAAAGTC  
TGAGTTTGGAACTCAGACATATGAACAGTGGGTGATCAGAGAAGAGAGAAGAGCTGCGAA  
AGAAGAAAAACGCAGGGAACGTGTCTGTGCAGAACACTTGAAGAAATACAATGATGCTCTC  
CAGATAAATGACACCATCCGAATGGTGGATGCCTACAATCACCTAAATAACTTTTATAAAGA  
GGAGAAAAGTAAGAAGACAGTAAGGAGTGATGATGATGATGATGATGAACCAGCAGTATCA  
AAACAGGATGAAACAGATGAATTTCTAATAGGTTTATTTACGCAAAAAAGAAACAGCTGAA  
AGAGTTGACTAGAAAGCCAGAAAATGAAAATGAGAAGCTAACGAAGTTGAGAAATACTTTA  
ATGGAGGAGTTCACAAAGACTGAAGAACCTCGAGGAATCATTTTCACAAAGACTCGTCTAA  
GTGCCTTTGCTCTTTTCCAGTGGATAAAGGACAACCCAAAATTTGAAGAAGTGGAATTAA  
GGCCCATTATCTTATTGGCTCTGGACATAAGAGTGAAATGAAGCCCATGACTCAGAATGAG  
CAAAGGGAAATTATTGACAAATTTGATGTGGAAATGTAAATTTACTAATTGCTACTACTGTA  
GCTGAGGAAGGCCTGGACATCAAAGAGTGTAACATCGTTATTCGCTATGGCCTCGTCACCA  
ATGAAATTGCTATGGTGCAGGCTCGTGGTAGAGCTCGAGCTGATGAAAGCACCTATGCTCT  
TGTGGCTTCAAGTGGCTCAGGGGCTGTTGAACGTGAAAATGTTAATATTTTTCTGAGAAA  
ATGATGTATAAGGCCATTACGCGTGTCCAGAAGATGCCACAGGAAGAGTATTTAAATAAGA  
TTCAGAGTTTCCAGTTGCAAAGTATAGTGGAAAAACAAATGAAGGTGGTGAGAGATCAGCG  
CAAGACATACAAGAAAAATCCTTCACTAATAAAATTTCTTATGCAAAAATTGCTCCAAGCCGA  
TATGTTCTGGAGAAGACATACAAGTTATTGAAGACATGCATCATGTCAGTGTGAAAAAGAT  
TTTCAAAGTCTTTATCATACAAGAGAAAAATAAAACACTGCAAGATAAGCATGCTGATTACCA  
AACAAATGGCGAAATTATATGCAAAGACTGTGGACAAGCTTGGGGAAATATGATGGTTCAC  
CGAGGTCTTGACCTGCCTTGTCTAAAGATCAGAAATTTTGTGGTTGTGTTTGCAGACAAGA  
AAACAACAAACAATATTTTTAAGAAATGGGGAGACCTGCCCATCAGGTTTCCTAGTTTTGAT  
TATGCAGCTCATTGTCTTCAAGTGATGAAGATTAA

>strigops\_habroptila-mda5

ATGGCAGCGGAGTTGCGAGACGAGCGGTTTCTCTACATGATCTCGTGCTTCAGGCCGCGG  
CTGAAGCAGTTCATCCGGGTGCAGCCGGTGCTGGACCGGCTCCCCTCGCTCAGCGCGGA  
CGACAGGGAGAAGGTGCGGGCGGGCCGCTCTGCAGCGGGGCGAGGTGGAAGGGGCGGA  
GGAGCTGCTACGGGCCGTGGAGCGGGGGCCCCGCGGGTGCGGCTGGTTCCACGAGTTC  
CTGCAGGCGCTGGAGCACGGCGGCTGCGGCATGGCCGCCTGCTACGTGAACCCAGCCT  
CAGCCAGCTGCCCTCGCCGGCCGAGGAGGACGACCACGACCTCTGCGTGCACCTTGGTGC  
AGCTGCTCCACAGCACACTGGTGGATAGTATGCGGACCGTGCAAGGTGGCCGAGAAGTGC  
CTGCAGATGGGCATCTTCCAGGATGAAGACCTGGATGGGATCCTTACTGTTACTGACAATC  
GTGGAAACAGAGAAGGTGCAAGGGAACCTGTTGAGCCGATTAGTGAGAAGAAAGATTGGT  
TCTCTCGTTTTCTGATTGCTCTGCGTGAAACCCAACATGGAGGCCTTGCAAGATGATTTGAG  
TGGAATATAGGAGGAACAGAAGATAAAACAAATGGGATGAAGAACAGTATAAACAAGGAA  
AGAGAAGTTAAAGGCCAACCAAGGTTATGCCATAGTGGAGGATTTGAAGCAGCAAGAAAATA  
TGAATGATAGTTTCAGCAGTGAGAACAATTTATTGGAACATCTATTGGAAGAATTCTGTA  
GTTTCAGAGTCAGATGTCTCTATAGGAGTTGGATGTGTGTCAGTAACTGAATGAAAACCTGG  
GTCAAAGCTGCACAACCAAGTGATTCAGATGCAGAGGAGAGCAGAGCTTCACCTGAGCCAG  
ATCTGGTCCTGAGAGATTACCAAATGGAAGTTGCAAAGCCAGCACTGAATGGGGAGAATAT  
TATAATATGTCTCCCTACAGGCAGTGGTAAAACCAGAGTGGCTGTTTACATTACCAAAGATC  
ATTTGGATAAGAAGAAGAGAGCATCAGAGCCTGGAAAAGTTATAGTCCTTGTTAATAAGGT  
ACCATTGGTAGAACAGCATTTACGAAAGGAGTTTAATCCATTTCTGAAGCGTTGGTATCACG



TTATTGGTTTAAGTGGTGATTCTCAGCTGAAAATCTCATTTCTGAAGTTGTCAGAAGAAAT  
GATGTCATCATCTGTACAGCACAGATACTTGAAAATTCAGTGCTAAATGCAGACGAAGAAG  
ATGGTGTCCACTTATCAGATTTTTCTCCTCATTATTGATGAGTGTATCACAACACTCAAAG  
GAAGGTGTCTACAACAACATAATGCGACGTTATTTAAAAGAAAAAAGAAGAACAGGAAGC  
TGGCAAAAGAAAAACAAACCACTGATCCACAGCCTCAGATTCTGGGACTTACAGCCTCACC  
TGGTGTAGGAGGTGCAACTTCCTACTCCAAAGCTGAAGAACATATTCTGAAAATCTGTGCC  
AATCTTGATGCATGTAGAATCATGACTGTTGAGGAGCATGCCTCCCAACTGAAGAATCAGG  
TGAAGGAACCTTTTAAGAAGACTGTGATTGCAGATGACAAAAGAAGGGATCCATTTAGAGA  
GAGAATAACTGAGATCATGACAGAGATTCAAACTATTGCCAGCTCCATCCAAAATCTGAGT  
TTGGAACCTCAGCCATATGAACAGTGGGTGATTAGAGAAGAGAAAAAGCTGCAAAAGAAGA  
AAACGCAAGGAACGTGTCTGTGCAGAACACCTGAAGAAATACAATGATGCTCTCCAGATA  
AATGATACCATCCGAATGGTGGATGCGTACAATCACCTGAATAACTTTTATAAGGAGGAGA  
AAAGTAAGAAGACAGTAAGGAGTGATGATGATGATGATGATGAACCAGCAGTATCAAACA  
GGATGAAACAGATTTATTTCTAATAGGTTTATTTTCATGCAAAAAGAAACAGCTGAAAGAGT  
TGGCTAGAAAGCCAGAATGTGAAAATGAGAAGCTAATACAGTTGCGAAACACTTTAATGGA  
GGAGTTCACGAAGACTGAGGCACCTAGAGGAATTATTTTCACAAAGACCCGGCTAAGTGC  
CTTTGCTCTATTCCAGTGGATTAAGGATAACCCAAAATTTGAAGAAGTGGGAATTAAGGCC  
CATCATCTTATTGGTGCTGGACATAACAGTGAAATGAAACGCATGACTCAGAATGAGCAAA  
GGGAAGTTATTGATAAATTCCGAGGTGGAATTTGAATTTACTTATTGCTACTACTGTAGCT  
GAGGAAGGCCTAGACATCAAAGAGTGTAACATTGTTATTCGCTACGGCCTCGTCACCAATG  
AAATTGCTATGGTGCAGGCTCGTGGTCGAGCTCGAGCTGATGAGAGCACCTATGCACTTG  
TGGCTTCGGTTGGCTCAGGAGCTGTTGAACGTGAAGATGTTAATATTTTCCGTGAGAAAAT  
GATGTATAAAGCCATTCAGCATGTCCAGAAAATGCCACAGGATGAGTATTTAAAGAAGATC  
CAGAATTTCCAGTGCCAAAATATAGTGGA AAAAGAAATTAAGGCAAAGAGACATCAGCACA  
AGACATACAAGAAAAATCCTTCACTATTAACATTCTATGCAAAAATTGCCACAAGCTGGTA  
TGTTCTGGAGAAGACATAAGAGTTATTGAGAACATGCATCATGTCAAGTGTA AAAAGAGATT  
CCAAAGTCTTTACCATACAAGAGAAAAATAAGACACTGCAAGATAAGGATGCTGATTACCAG  
ACAAATGGAGAAATTATATGTAAAGATTGTGGACAAGCTTGGGGAAATATGATGGTTCACC  
GAGGTCTTGACCTCCCTTGTCTAAAGATTATAAATTTTGTGATTGTGTTTGAAGACAAGAAG  
ATAACAAAAGAAATTTTTAAGAAATGGAGAGAACTGCCCATTAAGTTCCCTAGTTTTGATTAT  
ACAGCTCATTGTCCTTCAAGTGATGAAGATTAA

>spheniscus\_magellanicus-mda5

ATGGCAGAGGAGTCCCGAGACGAGCGCTTCCTCTACCTGATCTCCTGCTTCAGGCCGCGG  
CTGAAGCAGTTCATCCGGGTGCAGCCGGTGCTGGACCTGCTTCCCTCGCTGAGCGCTGG  
GGAGAGGGGAGAAGGTGCGGGCGGCCGCGCTGCAGCGGGGCGAGGTGGAGGGGGCGGA  
GGAGCTGCTGCGGGTCGTCGAGCGGGGGCCCCGCGGGTGCGGCTGGTTCCACGAGTTC  
CTGCAGGCGCTGGAGCAAGGTGGCTGCAGCCTGGCCGCCTGCTACGTGAACCCTAGCCT  
CAGCCAGCTGCCCTCGGCGGCCGAGGAGGAGGACCATGACCTCTGCGTGCACTTGGTG  
AGCTGCTCCACAGCACACTGGTGGATAGAATGCAGACCATGCAGGTGGCTGAGAAGTGCC  
TGCAGATGGGCATCTTCCAGGACGAGGACCTGGATCGGATCCCACTGTTACTGACAATC  
GTGGGAACAGAGATGGTGCAAGGGAGCTATTGAGCAGGATTGTGCAGAAGAAAGATTGGT  
TCTCTCCTTTTTTATTGCTCTGCGTGAAACCCAGCATGGAGGCCTTGCAAGATGATTTAAG  
CGGAAATACAGGAGGAACAGAGAATAGACAAAATGAGATGAAGAACAGTACAAATGAAGAA  
ACGGAAGTTACAAGCCAACCAGGATATGCCATAGTGGAGGATCTGAAACAGCAAGAAAAT

GTGAATGATAGTTTCAGCAGTGAGAACAGTGTATTGGAACATCTATTGGAAAGAATTCTAT  
AGTTTCAGAGTCAGATGTCTCCACAGGAGATGGAAGTGTGAGTAACTCGAACGAAAACCTG  
GGACAGAGCTGCACAACCAGTGATTGAGATGAAGATGAAGTGGAGAGTAGAGCTTCACCT  
GAGCCAGAGCTGATCCTGAGAGATTACCAGATGGAAGTTGCAAAGCCAGCACTGAATGGG  
GAGAATATTATAATATGTCTCCCTACAGGCAGTGGTAAAACCAGAGTGGCTGTTTACATTAC  
CAAAGATCACTTGGATAAGAAGAAAAGAGCATCAGAGCCTGGAAAAGTTATAGTACTTGTT  
AATAAGGTACCATTGGTAGAACAGCATTTACGAAAGGAGTTTAATCCATTCTGAAAGCGTTG  
GTATCAGGTTATTGGTTTAAGTGGTGATTCTCAGCTGAAAATCTCATTTCTGAAAGTTGTCA  
GTAGAAATGATGTCATCATCAGTACAGCGCAGATCCTTGAGAATTCAGTGTAAATGCAGC  
CGAAGAAGATGAAGAAGGTGTCCACTTATCAGATTTTTCTACTCATCATTATCGATGAGTGT  
ATCACACTCAAAGGAAGGTGTCTACAACAATATAATGCGACGTTACTTAAAAGAAAAGATG  
AAGAACAGGAAGCTGGCAAAGAAAACAAACCACTGATCCACAGCCTCAGATTCTGGGA  
CTTACAGCCTCACCTGGTGTAGGAGGTGCAACATCCTACTCAAAGCTGAAGAACATATTC  
TGAAAATCTGTGCCAATCTTGATGCATTTAGAATCATGACTGTTGAAGAGCATGCCTCCAG  
TTGAAGAATCAGGTGAAGGAACCGTATAAGAAGACGGTGATTGCGGATGACAAAAGAAGA  
GATCCATTTAGAGAGAGAATTACTGAGATCATGACAGACATTCAAACCTATTGCCAGCTCCA  
TCCAAAATCTGAGTTTGGAACCTCAGACATATGAACAGTGGGTGATTAGAGAAGAGAGAAAA  
GCTGCAAAAAGAAGAAAAACGCAAGGAACGTGTCTGTGCAGAACACTTGAAGAAATACAATG  
ATGCTCTCCAGATAAATGACACCATCCGAATGGTGGATGCGTACAATCACCTAAATAACTTT  
TATAAGGAGGAGAAAAAGTAAGAAAACAGTAAGGAGTGATGATGATGATGATGATGAACCAG  
CAGTATCAAACAGGATGAAACAGATGAATTTCTAATAGGTTTATTTTCATGCAAAAAAGAAG  
CAGCTGAAAGAATTGGCTAGAAAGCCAGAATATGAAAATGAGAAGCTAATACAGTTGCGAA  
AGACTCTGATGGAGGAGTTCACGAAGACTGAGGAACCTAGAGGAATTATTTTCACAAAGAC  
TCGGCTAAGTGCAATTTGCTCTATTGCAGTGGATTAAGGATAACCCAAAATTTGAAGAAGTG  
GGAATTAAGGCCAGTTATCTTATTGGTGCTGGACATAACAGTGAAATTAACCCCATGACTCA  
GAATGAGCAAAGGGAAGTTATTGACAAATTCCGAGGTGGAATGTAAATTTACTTATTGCTA  
CTACTGTAGCTGAGGAAGGCCTAGACATCAAAGAGTGTAACATCGTTATTCGCTATGGCCT  
CGTCACCAATGAAATTGCTATGGTGCAGGCTCGTGGTCGAGCTCGAGCTGATGAGAGCAC  
CTATGCACTTGTGGCTTCGAGTGGCTCAGGAGCTGTTGAACGTGAAGATGTTAATATTTTC  
CGTGAGAAAATGATGTATAAGGCCATTGAGCGTGTCCAGAAGATGCCGCGAGGAAGAGTATT  
TAAATAAGATACAGAATTTCCAGTTGCAAAGTATAGTGGAAAAACAAATGAAGGCAAAGAGA  
GATCGGCACAAGACATACAAGAAAAATCCTTACTAATAACATTCCTATGCAAAAATTGCCA  
CAAGCTGGTATGTTCTGGAGAAGACATACAAGTTATTGAAAACATGCATCATGTGAGTGTG  
AAAAAAGATTTCCAAAGTCTTACCATACAAGAGAAAATAAGACACTGCAAGATAAGCATGC  
CGATTACCAGACAAATGGGGAAATTATATGTAAAGATTGTGGACAAGCTTGGGGAAATATG  
ATGGTTCACCGAGGCCTTGACCTGCCTTGTCTAAAGATTAGAAATTTTGTGGTTGTGTTTGA  
AGACAAGAAAACAACAAAGCATATTTTTAAGAAATGGGGAGAACTGCCTGTCAGGTTCCCT  
AGTTTTGATTATGCAGCTCATTGTCCTTCAAGTGATGAAGATTAA

>sporophila\_hypoxantha-mda5

ATGGCAGAGGGCGCCCGGGACGAGCGGTTCTCTACATGATCTCCTGCTTCAGGCCGCG  
GCTGAAGCAGTTCATCCAGGTGCAGCCCGTGTGGACCGGCTGCCCTCGCTAAGCGCGG  
AGGACCGGGACAGGGTGCGGGCGGCCGCCCTGCAGCGGGGCGCGGCGGGCGGCCG  
AGGAGCTGCTGCGGGCCGTGGAGCGGGGGCCCCGCGGCTGCGGCTGGATCCGCGAGTT  
CCTGCAGGCGCTGGAGCACGGCGGCTGCAGCCTGGCCGCCTGCTACGCCAACCCAGC

CTCAGCCAGCTGCCCTCGCCGGCAGAGGAGGCCGAGCACGACCTCTGCGTGACCTGGT  
GCAGCTGCTGCACGGCACGCTGGTGGACAAGATGCGCGCCGGGCAGGTGGCGGAGAAG  
TGCCTGCAGATGGGAATCTTCCAGGACGAGGACGTGGATCGGATCCAGACTGTTGCTGAC  
AATCGTGGGAACAGAGATGGTGCAAGGGAGCTACTGAGCAGAATAGTCCAGAAGAAAGAC  
TGGTTCTCTTCTTTTTTATTGCTCTCCGTGAAACCCAACATGAAGACCTTGCAGATGATTT  
AAGTGGAATACAGGAGAGAATAAACAAAATGGGATGGAGCAGACTACGAATGAAGAAACA  
GAAATTACAAGCCAACCAGGATACGTCATAGAGGAGAATTTGAAACAGGAAGAAAATGTGG  
ATGATAGTTTCAGCAGTGAGAACAGTCTGTTGGAAACATCCATAGAAAAGAATTCTGTGATG  
TCAGAGTCAGATGTTTCCATAGGAGAKGGAAGTGTGAGTAACTTGAATGGAACTGGAGCT  
GCACAACCAGTGATTCAGATGAAGTGGAGAGGAGAGCCTCACCTGAGCCAGATCTGACCC  
TGAGAGATTACCAGATGGAAGTTGCAAAGCCAGCATTGAATGGGGAGAATATTATCATATG  
TCTCCCTACAGGCAGTGGTAAAACCAGAGTGGCTGTTTACATTACCAAAGATCACTTGGAT  
AAGAAAAAAGAGCATCAGAGCCTGGAAAAGTCATAGTACTTGTTAATAAGGTTCCATTGGT  
AGAACAGCATTAAAAAGAGAGTTTGGTCCATTCTGAAGCGTTGGTATCAGGTTATTGGTT  
TAAGTGGTGATTCTCAGCTGAAAATCTCATTTCTGAAGTTGTCAGAAGAAATGATGTCATC  
ATCAGTACAGCACAGATCCTTGAGAATTCATGTTAAATGCCTCCAAGGAAGATGAAGAAA  
GTGTCCACTTATCAGATTTTTCCCTCATCATCATCGATGAGTGTGTCATCACTCAAAGGAA  
GGTGTCTACAATAACATAATGAGACGTTACTTAAAAGAAAAGATGAAGAACAGGAAGCTGG  
CAAAAGAAAACAAACCACTGATCCACAGCCTCAGATTCTGGGACTTACAGCCTCACCTGG  
TGTAGGAGGTGCAACATCCTACTCAAAAGCTGAAGAGCATATTCTGAAAATCTGTGCCAAT  
CTTGATGCATGTAGAATTATGACTGTTGAAGAGCATGCCTCCCAGCTAAAGAATCAGGTGA  
AGGAACCATCTAAGAACTGTGATTGCAGATGATAAAAAAGGGATCCATTTAAAGAGAG  
ACTCACTGAGATCATGACAGAAATACAAAATATTGCCAGCTGCATCCGAAGTCTGAGTTT  
GGAATCAGACATATGAACAGTGGGTGATCAGAGAAGAGAGAAGAGCTGCRAAAGAAGAA  
AAACGCAGGGAACGTGTCTGTGCAGAGCACTTGAAGAAATACAATGATGCTCTCCAGATAA  
ATGACACCATCCGAATGGTGGATGCCTACAATCACCTRAATAACTTCTATAAAGAGGAGAA  
AAGTAAGAAGACAGTAAGGAGTGATGATGATGATGATGATGAGCCAGCAGTATCAAAACAG  
GATGAAACAGATGAATTTCTAATAGGTTTATTTTCATGCAAAAAAGAAACAGCTGAAAGAGTT  
GACTAGAAAGCCAGAAAATGAAAATGAGAAGCTAATGGAGTTGAGAAATACTTTAATGGAG  
GAGTTCACGAAGACTGAAGAACCTAGAGGAATCATTTTCACAAAGACTCGTCTAAGTGCCT  
TTGCTCTTTTCCAGTGGATTAAGGACAACCCAAAATTTGAAGAAGTGGGWATTAAAGCCCA  
TTATCTTATCGGCTCTGGACATAAGAGTGAAATGAAGCCCATGACTCAGAATGAGCAAAGG  
GAAGTTATTGATAAATTTTCGATGTGGAAGTGTAATTTACTGATTGCTACTACTGTAGCTGA  
GGAAGGCCTGGACATCAAAGAGTGTAACATCGTTATTCGCTACGGCCTTGTCCCAATGAA  
ATTGCTATGGTGCAGGCTCGTGGTAGAGCTCGAGCTGATGAAAGCACCTATGCTCTTGTG  
GCTTCAAGTGGCTCAGGGGCTGTTGAACGTGAAAATGTTAATACTTTTCGTGAGAAAATGA  
TGTATAAGGCCATTACAGCGTGTCCAGAAGATGCCACAGGAAGAATATTTAAATAAGATTCA  
GAGTTTCCAGTTGCAAAGTGTAGTGGAAAAACAAATGAAGGTGGTGAGAGATCAGCGCAA  
GACATACAAGAAAAATCCTTCACTAATAAAATTCTTATGCAAAAATTGCTCCAAGCCGATAT  
GTTCTGGAGAAGACATACAAGTTATTGAAGACATGCATCATGTGAGTGTGAAAAAGATTTT  
CAAAGTCTTTATCATACAAGAGAAAATAAAACACTACAAGATAAGCACGCTGATTACCAGAC  
AAATGGGGAAATTATATGCAAAGACTGTGGACAAGCTTGGGGAAATATGATGGTTCCACCGA  
GGTCTTGACCTGCCTTGTCTAAAGATCAGAAATTTTGTGGTTGTGTTTGCAGACAAGAAAAC  
AACAAACAATATTTTTAAGAAATGGGGAGACCTGCCCATCAGGTTTCCTAGTTTTGATTATG

CAGCTCATTGTCCTTCAAGTGATGAAGATTAA

>sterna\_hirundo-mda5

ATGGCAGAGGAGTGCCGAGACGAGCGGTTCTCTACATGATCTCCTGCTTCAGGCCGCGG  
CTGAAGCAGTTCATCCGGGTGCAGCCGGTGCTGGACCGGCTTCCCTCGCTGAGCCCGGA  
GGACAGGGAGAGGGTGCGGGCGGCCGCCCTGCAGCGCGGCGAGGTGGAGGGGGCAGA  
GGAGCTGCTGCGGGCCGTGGAGCGGGGTCCCCGCGGCTGCGGCTGGTTCCACGAGTTC  
CTGCAGGCGCTGGAGCAGGGCGGCTGCAGGCTGGCTGCCTGCTACGTGAACCCAGCCT  
CAGCCAGCTGCCCTCGGCGACCGAGGAGGCTGACCATGACCTCTGCGTGCACTTGGTGC  
AGCTGCTCCACAGCACACTGGTGGATAAAATGCAGACCGTGCAGGTGGCTGAGAAGTGCC  
TGCAGATGGGCATCTTCCAAGAGGACGACCTGGATCGGATCCCACTGTTACTGACAATC  
GTGGGAACAGAGATGGTGCGAGGGAGCTATTGAGCAGAATAGTGCAAGAAGAAAGACTGGT  
TCTCTCCTTTTTTGGTTGCTTTGCGTGAAACCCAACATGGAGACCTTGCAGATGATTTAAGC  
GGAAATACAGGAGAAACAGAGAATAGACAAAATGGGATGAAGAACAGTACAAACGAAGAAA  
CAGAAGTTACAAGCCAACTAGGATATGCTGTAGCGGAGGATTTGAAACAGCAAGAGAATGT  
GAATGGTAGTTTTCAGCAGCGAGAACAGTGTATCGGAAACATCTATTGGAAAGAATTCTCTA  
GTTCCAGAGTCAGATGTCTCCATAGGAGATGGAAGTGTGAGTAACTTGAATGAAAACCTGG  
GACAGAGCTGCACAACCACTGATTCAGAGGAAGATGAAGTGGAGAGCAGAGTTTCACCTG  
AGCCAGATCTGATCCTGAGAGATTACCAGATGGAAGTTGCAAAGCCAGCACTGAATGGGG  
AGAATATCATAATATGTCTGCCTACAGGCAGTGGTAAAACCAGAGTGGCTGTTTACATTACC  
AAAGATCACTTGGATAGGAAGAAAAGAGCATCTGAGCCTGGAAAAGTTATAGTACTTGTTA  
ATAAGGTACCGTTGGTAGAACAGCATTTACGAAAGGAGTTTAATCCATTCCCTGAAGCGTTG  
GTATCAGGTTATTGGTTTAAGTGGTGATTCTCAGCTGAAAATCTCATTTCCCTGAAGTTGTCA  
GAAGAAATGATGTCATCATCAGTACAGCACAGATCCTTGAGAATTCAGTGTAAATGCAGC  
CAAAGAAGATGAAGAAGGTGTCCACTTATCAGATTTTTTCACTCATCATTATTGATGAGTGT  
ATCACACGCAAAAGGAAGGTGTCTACAACAATATAATGCGACGTTACTTAAAAGAAAAGAG  
GAAGAACAGGAAGCTGGCAAAAGAAAACAAACCACTGATCCACAGCCTCAGATTCTGGG  
ACTTACAGCCTCACCTGGTGTAGGAGGTGCAACATCCAACCTCAAAGCTGAAGAACATATT  
CTGAAAATCTGTGCCAATCTTGACGCACGTAGAATCATGACTGTTAAAGAGCATGCCTCCC  
AACTGAAGAACCAGGTGAAGGAACCGTATAAGAAGACTGTGATTGCAGATGACAAAAGAAG  
GGATCCATTTAGAGAGAGAATTACTGAAATAATGAGTGAGATTCAAACCTATTGCCAGCTCT  
ATCCAAAATCTGAGTTTGGAACCTCAGCCATATGAACAGTGGGTGATTAGAGAAGAGAAAAA  
AGCTGCAAAAGAAGAAAAACGCAAGGAACGTGTCTGTGCAGAACACCTGAAGAAATACAAT  
GATGCTCTCCAGATAAATGATACCATCCGAATGGTGGATGCGTATAATCACCTAAATAACTT  
TTATAAGGAGGAGAAAAAGTAAGAAGACAGTAACGAGTGATGATGATGATGATGAACCA  
GCAGTATCAAAACAGGATGAAACAGACGAATTTCTAATAGGTTTATTTCAAGCAAAAAAGAA  
ACAGCTGAAAGAGTTGGCTAGAAAGCCAGAATATGAAAACGAGAAGCTAATACAGTTGCGA  
AACACTTTAATGGAGGAGTTCACGAAGACGGAAGAACCTAGAGGAATTATTTTCACAAAGA  
CTCGGCTAAGCGCCTTTGCTCTATTCCAGTGGATTAAGGACAACCCAAAATTTGAAGAAGT  
GGGAATTAAGGCCATTATCTTATTGGTGCTGGACATAACAGTGAAATTAACCCATGACTC  
AGAATGAGCAAAGGGAAGTCATTGATAAATTCCGAGGTGGAAGTGTAATTTACTTATTGC  
CACTACTGTAGCTGAGGAAGGCCTAGACATCAAAGAGTGTAACATCGTTATTCGCTATGGC  
CTCGTCACCAATGAAATTGCTATGCTGCAGGCTCGCGGTGAGCTCGAGCTGATGAGAGC  
ACCTATGCACTTGTGGCTTCAAGTGTCTCAGGAGCTGTTGAACGTGAAGATGTTAATTTTT  
CCGTGAGAAAATGATGTATAAGGCCATTGAGCGTGTCCAGAACATGCCACAGGAAGAGTAT

TTAGATAAGATTGAGAATTTGCAGTTGCAAAGTATCGTGAAAAACAAATGAAGGCAAAGA  
GAGATCAGCAGAAGACATACAAGAAAACCCCTTCATTAGTAACTTTCTATGCAAAAATTGC  
CACAAGCCGGTATGTTCTGGAGAAGACATACAAGTTATTGAAAACATGCATCATGTCAGTG  
TGAAAAAAGACTTCCAAACTCTTTACCATACAAAAGAAAATAAGACACTGCAAGATAAGCAT  
GCCGATTACCAGACAAATGGGGAAATTATATGTAAAGATTGTGGACAAGCTTGGGGAAATA  
TGATGGTTCACCGAGGTCTTGACCTGCCTTGTCTAAAGATTAGAAATTTTGTGGTTGTGTTT  
GAAGACAAGAAAACAACAAAGCACATTTTAAAGAAATGGGGAGAACTGCCCATCAAGTTCC  
CTAGCCTTGATTATGCAGCTCATTGTCCTTCAAGTGATGAAGATTAA

>strix\_occidentalis-mda5

ATGGCGAAGGAGTCCCGAGACGAGCGATTCTCTACATGATCTCCTGCTTCAGGCCGCGG  
CTGAAGCAGTTCATCCGGGTGCAGCCGGTGCTGGACCAGCTTCCCTCGCTGAGCGCGGA  
GGAGAGGGAGAAGGTGCGGGGCGGCCGCCCTGCAGCGGGGCGAGGTGGAGGGGGCGGA  
GGAGCTGCTGCGGGCCGTGGAGCGGGGCCCGCGGGTGCGGCTGTTCCACGAGTTC  
CTGCAGGCGCTGGAGCACGGCGGCTGCAGCCTGGCCGCCTGCTACGTGAACCCAGCCT  
CAGCCAGCTGCCCTCGCCGGCCGAGGAGGCCGACCACGACCTCTGTGTGCAATTGGTGC  
AGCTGCTCCACAGCACGCTGGTGGATAGAATGCAGACGATGCAGGTGGCCGAGAAGTGC  
CTAGAGATGGGCATCTTCCAGGACGAGGACATGGACCGGATCCACGCTGTTACTGACAAT  
CGTGGGAACAGAGAGGGTGCAAGGGAGCTATTGAGCAGAATAGTGCAGAAGAAAGATTGG  
TTCTCTCCTTTTTTGATTGCTCTGCGTGAAACCCAACATGGAAGCCTTGAGATGATTTAAG  
TGGAATACAGGAGGAACAGAGAATAGACAAAATGGGATGAAGAACTGTACAAACGAAGAA  
ACAGAAGTTGCAAGCCAACCAGGATATGCTGTAGTAGAGGACTTGAAACAGCAAGAAAATG  
TGAATGATAGTTTCAGCAGTGAGAACAGTGTTTTGGAACATCTGTTGGAAGAATTCTGTA  
GTTTCAGAGTCAGATGTCTCCTTAGGAGATGGAAGTGTGAGTAACTTGGATGAAAACCTGG  
GACAGAGCTGCACAACCAGCGATACAGATGAAGATGAAGTGGAGAGCAGAGCTTCACCTG  
AGCCAGATCTGATCCTGAGAGATTACCAGATGGAAGTTGCAAAGCCAGCACTGAATGGGG  
AGAATATTATCATATGTCTCCCTACAGGCAGTGGTAAAACCAGAGTGGCTGTTTATTATTACC  
AAAGATCACTTGGATAAGAAGAAAAGAGCATCAGAGCCCGGAAAAGTTATAGTACTTGTTA  
ATAAGGTACCACTGGTAGAACAACATTTACGAAAGGAGTTTACTCCATTCCCTGAAGCGTTG  
GTATCAGGTTATTGGTTTAAGTGGTGATTCTCAACTGAAAATCTCATTTCTGAAGTTGTCA  
GAAGAAATGATGTCATCATCAGTACAGCACAGATCCTTGAGAATTCAGTGTTAAATGCAGC  
CAAAGAAGATGAAGAAGGTGTCCACTTATCAGATTTTTCACTTATCATTATCGATGAGTGTC  
ATCACACTCAAAGGAAGGTGTCTACAACAATATAATGCGACGTTACTTAAAAGAAAAGATG  
AAGAACAGGAAGCTGGCAAAGAAAACAAACCACTGATCCCGCAGCCTCAGATTCTGGGA  
CTTACAGCCTCACCTGGTGTAGGCGGTGCAACATCCTACTCAAAGCTGAAGAACATATTC  
TGAAAATCTGTGCCAATCTTGATGCGTGGAATCATGACTGTGGAAGAGCATGCCTCCCA  
GCTGAAGAATCAGGTGAAGGAACCATATAAGAAGACTGTGATTGCAGATGACAAGAGAAG  
GGATCCATTTAGAGAGAGAATTACTGAGATCATGACAGGCATTCAAACCTATTGCCAGCTC  
CATCCAAAGTCTGAGTTTGGAACTCAGCCATATGAACAGTGGGTGATCAGAGAAGAGAGG  
AAAGCTGCAAAAAGAAGAAAACGCAAGGAACGTGTCTGTGCAGAGCACTTGAAGAAATACA  
ATGATGCTCTCCAGATAAATGACACCATCCGAATGGTGGATGCGTACAATCACCTAAATAA  
CTTTTATAAGGAGGAGAAAAGTAAGAAGATGGTAAGGAGTGATGATGACGATGATGATGAA  
CCAGCAGTATCAAACAGGATGAAACAGATGAATTTCTAATAGGTTTATTTTCATGCAAAAAA  
GAAACAGCTGAAAGAGTTGGCTAGAAAACCAGAATATGAAAATGAGAAGCTAATACAGTTG  
CGAAACACTTTAATGGAGGAGTTCACGAAGACTGAAGAACCTAGAGGAATTATTTTCACAA

AGACTCGGCTAAGTGCCTTTGCTCTATTCCAGTGGATTAAGGATAACCCCAAATTTGAAGA  
AGTGGGAATTAAGGCCCATTTATCTTATCGGTGCTGGACATAACAGTGAAATTAACCCATG  
ACTCAGAATGAGCAAAGGGAAGTTATTGATAAATTCCGAGGTGGAAATGTAAATTTACTTAT  
TGCTACTACTGTAGCTGAGGAAGGCCTAGACATCAAAGAGTGTAACATCGTTATTAGCTAT  
GGCCTCATCACCAATGAAATTGCTATGGTGCAGGCTCGTGGTCGAGCTCGAGCTGATGAG  
AGCACCTATGCACTTGTGGCTTCAAGTGGCTCAGGAGCTGTTGAACGTGAAGATGTTAATA  
TTTTCCGTGAGAAAATGATGTATAAGGCCATTGAGCGTGTCCAGAAGATGCCGCAGGAAGA  
GTATTTAAAGAAGATTGATAATTTCCAGTGGCAAAGTATAGTAGAAAAACAAATGAAGGCAA  
AGAGAGATCAGTGCAAGCCATACAAGAAAAATCCTTCACTAATAACATTCTTATGCAAAAAT  
TGCCACAAGCTGATATGTTCTGGAGAAGACATACAAGTTATTGAAAAGATGCATCATGTCA  
GTGTGAAAAAAGACTTCCAAAGTCTTTACCATACAAGAGAAAAATAAGACACTGCAAGATAAA  
CATGCCGATTATCAGACAAATGGAGAAATTATATGTAAAGATTGTGGACAAGCTTGGGGAA  
ATATGATGGTTCACCGAGGTCTTGACCTGCCTTGTCTAAAGATTAGAAATTTTGTGGTTGTG  
TTTGAAGACAAGAAAAACAACAAAGCAAATTTTAAAGAAATGGGGAGAACTGCCCATCATGTT  
CCCTAGTTTTGATTATGCAGCTCATTGTCCTTCAAGTGATGAAGACTAA

>struthio\_camelus-md5

ATGTCGGAGGAGTCCCGAGCCGAGCGCTTCCTCTACATGATTTCTGCTTCAGGCCGCGG  
CTGAAGCGCACCATCCGGGTGCAGCCGGTGCTGGACTGGCTGCCCTCGCTGAGCGCCGA  
GGAGCGGGAGCAGGTGCGGGCGGCGCTGCAGCGGGGCGAGGTGGAGGCGGCGGAGCT  
GCTGCTGCGCGCCGTGGAGCGGGGGCCCCRCGACCGCTTCCCCGAGTTCCTGCAGGCG  
CTGGAGCGCGGCGGCTGCAGCCTGGCCGCCTGCTACGTGAACCCCAGCCTCAGCCAGCT  
GCCCTCGCCGGCGGAGGAGGCCGACCACGACCTCTGCGTGCACCTTGGTGCAGCTGCTCC  
ACGGCACGCTGGTGGATAACATGCGGACCATGCAGGTGGCCGAGAAGTGCTGCAGATG  
GACATCTTCCAGGTGCAGGACCTGGAGCGGATCCAGACTGTTACTGAAAATCGTGGGAAC  
AGAGATGGTGCAGGGAAGTGTAAAGTAGAATAGTTCAGAAGAAGGACTGGTTCTCCCCTT  
TTTTGATCGCTTTGCGTGGAAACCCAACATGAAGACCTTGCAGATGATTTAAGTGGAATAC  
GGGAGGAATAGAAAATAGAGAAAACGAAATGAATAACAGGACAAATGAAGAAACAGAAGTC  
ACAAGGCAACCGGGACATGCTATAGTGGAGGATTTCAAACAGCAAGAAAAATATGAATGACA  
GGTTAGCCAGTGAGAGTAACGTTTTGGAAAGATCTATTGGAGAGAATTCTGTAGCTTCAGA  
GTCTGATGTCTGTATAGGAGATGGAAGTGTGAGTAACATGAATGCAAACCTGGCACAGAGC  
GGCAGCACAAACAGTGATTCAGATGAAGATGATATGGAAAGCAGAGCTTCACCTGAGCCA  
GATCTGACCCTGAGAGATTACCAGATGGAAGTTGCAAAACCAGCACTGAACGGGGAGAAT  
ATTGTCATATGTCTCCCTACAGGCAGTGGTAAAACCAGAGTGGCTGTTTACATTACCAAAG  
ATCACTTGGATAAGAAGAGAAGAGCATCAAAGCCTGGAAAAGTTATAGTACTTGTTAATAAG  
GTACCATTGGTGGAACAGCATTTACGAAAGGAGTTTTAGCCATTCTGAAGCGTTGGTATC  
AGGTTATTGGTTAAGTGGTGATTCTCAGCTGAAAATCTCATTTCTGAAGTTGTCAGAAGA  
AATGATGTCATAATCAGTACAGCACAGATCCTTGAGAATCACTGCTAAACGCAACTAAAGA  
AGATGAGGAAGGTGTCCGCTTATCAGATTTTTCACTTATCATTATTGATGAATGTCACCACA  
CTCAAAGGAAGGTGTCTACAACAATATAATGCGACGTTACTTAAAGAAAAGATGAAGAAT  
GAGAAGCTGGCAAAAGAAAACAGACCACTAATTCCACAGCCTCAGATTCTGGGACTTACAG  
CCTCACCTGGTGTAGGAGGTGCAACATCCTATTTGAAAGCTGAAGAACATATTCTGAAATT  
CTGTGCCAATCTTGATGCATGTAGAATCATGACTGTTGAAGAGCATGCCTCCCAACTGAGG  
AATCAGGTGAAGGAACCATATAAGAAGACTGTGATTGCAGATGACAAAAGAAGGGATCCGT  
TTAGAGAGAAAATTATCGAGATCATGACCGACATTCAAAACTATTGCCAGCTCCATCCAAAA

TCTGAGTTTGGAACTCAGCCATATGAGCAGTGGGTGATTAGGGAGGAGAAAAAGCGGCA  
AAAGAAGAAAAACGCAAGGAACGTGTGTGTGCAGAACACCTGAAGAAATACAATGATGCTT  
TGCAAATAAATGATACCATTCTGAATGGTTGATGCATACAATCACCTAAGTAACTTTTATAAG  
GAGGAAAAAAGCAAGAAAAACAATAGTGAGTGATGATGAGGATGAACCAGCAGTATCAAAAC  
AGGATGAAACAGATGAATTTCTAATAGGTTTATTTTATGCAAAAAAGAAACAGCTGAAAAAG  
TTGGCTAGAAATCCAGAATATGAAAATGAGACGCTAACACAGCTGCGAAATACTTTAATGG  
AGGAGTTCACCAAGACTGATGAACCAAGAGGAATTATTTTCACAAAGACCCGGCAAAGTGC  
CTTTGCTCTGTTTCAGTGGATTAAGGATAACACAAAATTTGAAGAAGTGGGAATTAAGCCC  
ATTATCTTATTGGCGCTGGACACAACAGTGAAATTAACCCCATGACTCAGAATGAGCAAAG  
GGAAGTCATTGGTAAATTCCGAAATGGAAGTGTAACCTTACTCATCGCTACTACTGTAGCTG  
AGGAAGGCCTGGACATCAAGGAGTGTAACATTGTTATTTCGCTATGGCCTTGTCACCAATGA  
AATTGCTATGTTGCAGGCCCGTGGTCGAGCTCGAGCTGATGAGAGCACCTATGCACTTGT  
GGCTTCAAGCAACTCAGGAGCTGTTGAACGTGAGGATGTTAATAGTTTCCGTGAGAAAATG  
ATGTATAACGCCATTTCAGCGTGTCCAGAAGATGCCACAGAAAGAGTATTTAAAAAAGATTCA  
GACCTTCCAGTTGCAAAGTATAATGGAIAAAAAAAAAATGAAGGCAAAGAGAGATCAGTGTAAG  
ACATATAAGAAAAATCCTTCACTAATAACATTCTATGCAAAAATTGCCACAAGCTGGTATG  
TTCAGGAGAAGATATACAAGTTATTGAAAACATGCATCATGTCAAGTGTAIAAAAAAGATTTCC  
AAAGCCTTTATGATAAAAGAGAAAAATAAGACACTGCAAGATAAACATGCTGATTACCAGACA  
AATGGGGAAATTATATGTAAAGACTGTGGACAAGCTTGGGGAAATATGATGGTTCACCGAG  
GTCTTGACCTGCCTTGCTAAAGATTAAAAATTTTGTGGTTGTGTTTGAAGACAAGAAAAACA  
ACAAAGCAAATTTTTTAAGAAATGGGGAGAACTGCCAGTCAGGTTCCCTGTTTTTGATTATGC  
AGGTCATTGTCTTCAAGTGATGAAGATTAA

>sturnus\_vulgaris-mda5

ATGGCAGAGGGGCACCCGGGACGAGCTGTTTCTCTACATGATCTCCTGCTTCAGGCCGCGG  
CTGAAGCGGTTTCATCCAGGTGCAGCCCGTGCTGGACCGGCTGCCGGCGCTGAGCGCGGA  
GGACAGGGACAGGGTGCGAGCGGCCCGCCAGCAGCGGGGCGCGGGCGGGCGGCCGA  
GGAGCTGCTGAGGGCCGTGGAGCGGGGGCCCCGCGGCTGCGGCTGGATCCGCGAGTTC  
CTGCAGGCGCTGGAGCAGGGCGGCTGCGGCCTGGCCGCTTGCTACGCCAACCCAGCCT  
GAGCCAGCTGCCCTCGCCGGCAGAGGAGGCCGAGCACGACCTGTGCGTGACGCTGGTG  
CAGCTGCTGCACGGCACGCTGGTGGACAGGATGCGCGCCGTGCCGGTGGCCGAGAAGT  
GCCTGGAGATGGGAATCTTCCAGGACGAGGACATGGATCGGATCCAGACAGTTACTGACA  
ATCATGGGAACAGAGATGGTGCAAGGGAGCTACTGAGCAGAATAGTCCAGAAGAAAGATT  
GGTTCTCTTCTTTCTTGGTTGCTCTCCGTGAAACCCAACATGAAGACCTTGCGTATGATTTA  
AGTGGAAATACAGGAGAGAATAAAACAAAATGGGATGGAGCAGACTACAAATGAAGAAACAG  
AAGTTACAAGCCAACCAGGATACGTACAGAGGAGAAATTTGAAACAGGAAGAAAAATGTGGA  
TGATAGTTTCCACAGTGAGAACAGTGTGTTGGAAACATCCATGGAAATAATTCTGTGGCAT  
CAGAGTCAGATGTCTCCGTAGGAGATAGAAGGGTCAATAACTTGGATGAAAACCTGGGAC  
AGAGCTACACAACCAGTGATTGAGATGAAGAGGAGAGGAGAGCCTCACCTGAGCCAGATC  
TGACCCTGAGAGATTACCAGATGGAAGTTGCAAAGCCAGCATTGAATGGGGAGAATATTAT  
AATATGTCTCCCTACAGGCAGTGGTAAAACCAGAGTGGCTGTTTACATTACCAAAGATCAC  
TTGGATAAGAAGAAAAGAGCATCAGAGCCTGGAAAAGTCATAGTACTTGTAAATAAGGTCC  
CATTGGTTGAACAGCATTTACAAAGAGAGTTTAGTCCATTCTGAAGCGTTGGTATAAGGTT  
ACTGGTTTAAGTGGTGATTCTCAGCTGAAAATCTCATTTCTGAAGTTGTCAGAAGAAATGA  
TGTCATCATCAGTACAGCACAGATCCTTGAGAATTCCTGTTAAATGCATCCAAGGAAGAG

GAAGAAAGTGTCCACTTATCAGATTTTTCCCTCATCATTATTGATGAGTGTCACTCA  
AAAGGAAGGTGTCTACAACAATATAATGCGACGTTACTTAAAAGAAAAGATGAAGAACAGG  
AAGCTGGCAAAAGAAAACAAACCACTGATCCACAGCCTCAAATTCTGGGACTTACAGCCT  
CACCTGGTGTAGGAGGTGCAACATCCTACTCAAAAGCTGAAGAGCATATTCTGAAAATTTG  
TGCCAATCTTGATGCATGTAGAATTATGACTGTTGAAGAGCATGCCTCCCAATTGAAGAATC  
GGGTGAAGGAACCATCTAAAAAACTGTGATTGCAGATGACAAAAAAGGGATCCATTTAA  
AGAGCGAATTACTGAGATCATGACAGAAATTCAAACTATTGCCAGCTGCATCCAAAGTCT  
GAGTTTGGAACCTCAGACATATGAACAGTGGGTGATCAGAGAAGAGAGAAGAGCTGCAAAA  
GAAGAAAAACGCAGGGAACGTGTCTGTGCAGAGCACCTGAAGAAATACAATGATGCTCTC  
CAGATAAATGACACCATCCGAATGGTGGATGCCTACAATCACCTAAATACTTTTATAAGGA  
GGAGAAAAGTAAGAAGACAGTAAGGAGTGATGATGATGATGATGAACCAGCAGTATCA  
AAACAGGATGAAACAGATGCATTTCTAATAGATTTATTTTCATGCAAAAAAGAAACAGCTGAA  
AGAGTTGACAGGAAAGCCAGAAAATGAAAATGAGAAATTAATAAAGTTGAGAAATACTTTAA  
TGGAGGAATTCACGAAGACTGAGGAACCTCGAGGAATCATTTTCACAAAGACTCGTCTAAG  
TGCCTTTGCTCTATTCCAGTGGATTAAGGACAACCCAAAATTTGAAGAAGTGGGAATTAGG  
GCCATTATCTGATCGGCTGTGGACATAAGAGTGAAATGAAGCCCATGACTCAGAATGAGC  
AAAGGGAAGTTATTGATAAATTTTCGACATGGAAGTATAAATTTACTAACTGCTACTACTGTA  
GCTGAGGAAGGCCTGGACATCAAAGAGTGTAACATCGTTATTCGCTACGGCCTCGTCACC  
AATGAAATTGCCATGGTGCAGGCTCGTGGTAGAGCTCGATCTGATGAAAGCACCTATGCTC  
TTGTGGCTTCAAGTGGCTCAGGGGCTGTTGAACGTGAAGATGTGAATATTTTTTCGTGAGCA  
AATGATGTATAAGGCCATTTCAGCGTGTCCAGAAGATGCCACAGGAAGAGTATTTAAATAAG  
ATTCAGAGTTTCCAGTTGCAAAGTATAGTGGA AAAACAAATGAAGGCCAAAGAGAGATCAGT  
GCAAGACATACAAGAAAAATCCTTCACTAATAAAATTTCTTATGCAAAAATTGCTACAAGCCA  
ATATGTTCTGGAGAAGACATACAAGTTATTGAAGACATGCATCATATCAGTGTGAAAGAAGA  
TTTCCAAAGTCTTTATCATACAAGAGAAAATAAAACACTGCAAGATAAGAATGCTGATTACC  
AAACAAATGGGGAAATTATATGCAAAGACTGTGGACAAGCTTGGGGAAATATGATGGTTCA  
CCGAGGTCTTGACCTGCCTTGTCTGAAGATTAGAAATTTTGTGGTTGTGTTTGCAGACAAG  
AAAACAACAAAGCAAATCTTTAAGAAATGGGGAGAGCTGCCCATCAGGTTTCCTAGTTTTG  
ATTATGCAGCTCATTATCCTTCAAGTGATGAAGATTAA

>sylvia\_atricapilla-md5

ATGGAAGAGAGCACCCGGGACGAGCGGTTTCCTGTACATGATCTCCTGCTTCAGGCCGCG  
GCTGAAGCAGTTCATCCAGGTGCAGCCCGTGCTGGACCAGCTCCCGTCGCTGAGCGCGG  
AGGACAGGGACAGGGTGCGTGCGGCCGCCAGCAGCGGGGCGCGGCGGGCGGCCG  
AGGAGCTGCTGCGGGCCGTGGAGCGGGGCCCCGCGGCTGCGGCTGGATCCGCGAGTT  
CCTGCAGGCGCTGGAGCGCGGGGGCTGCAGCCTGGCCGCCTGCTACGCCAACCCACGC  
CTGAGCCAGCTGCCCTCGCCGGCACAGGAGGCCGAGCACGACCTGTGCGCCCGCCTGGT  
GCAGCTGCTGCACGGCACGCTGGTGGACAGGATGCGCGCCGTGCCGGTGGCCGAGAAG  
TGCCTGGAGATGGGAATCTTCCAGGACGAGGACATGGATCGGATCCAGACTGTTTCTGAC  
AATCGTGGGAACAGAGATGGTGCAAGGGAGCTACTGAGCAGAATTGTCCAGAAGAAAGAT  
TGGTTCTCTTCTTTTTTGGTTGCTCTCCGTGAAACCCAAACATGAAGATCTTGCAGATGATTT  
AAGTGGAAATACAGGAGAGAATAAACAAAATGGGATGGAGGAGAATACAAATGAAGAGACA  
GAAGTTACAAGCCAACCTGGACACATCATAGAGGAGAATTTGAAGCAGGAAGAAAATGTGG  
ATGATAGTTTCAGCAGTGGGAGCAGTGTGTTGAAACATCCACAGAAAAGAATTCTACGGT  
GTCAGAGTCAGATGTCTCCATAGGAGATGGAAGTGTCATTAACCTGAATGAAGACCTGGGA



CAGAGCTGCACAACCAAGTGATTCAGATGAAGTGGAGAGGAGAGCCTCACCTCAGCCAGAT  
CTGACCCTGAGAGATTACCAGATGGAAGTTGCAAAGCCAGCACTGAATGGGGAGAATATTA  
TAATATGTCTCCCTACGGGCAGTGGTAAAACCAGAGTGGCTGTTTACATTACCAAAGATCA  
CTTGGATAAGAGAAGAGCATCAAAGCCTGGAAAAGTCATAGTACTTGTTAATAAGGTTCCAT  
TGGTAGAACAGCATTTACGAACAGAGTTTAGTCCATTCCCTGAAGCGTTGGTATCAGGTTATT  
GGTTTAAGTGGTGATTCTCAGCTGAAAATCTCATTTCCCTGAAGTTGTCAGAAAGAAATGATGT  
CATCATCTGTACAGCACAGATCCTTGAGAATTCAGTGTAAATGCATCCAAGGAAGATGAA  
GAAGGCGTCCACTTATCAGATTTTTCCCTCATCATTATCGATGAGTGTATCAGACTCAAAA  
GGAAGGTGTCTACAACAACATAATGCGACGTTACTTAAAAGAAAAGATTAAGAACAGGAGG  
CTGGCAAAAAGAAAACAAACCACTGATCCACAGCCTCAGATTCTGGGACTTACAGCCTCAC  
CTGGTGTAGGAGGTGCAACAACCAACTCGAAAGCTGAAGAGCACATTTTGAAAATCTGTGC  
CAATCTCGATGCAAGTAGAATTATGACTGTTGAGGAGCATACTTCCCAGCTAAAGAATCAG  
GTGAAGGAACCATCTAAGAAGACTGTGATTGCAGATGACAAAAAGAGGGATCCATTTAAAG  
AGAGAATTATTGAGGTCATGACAGAAATACAAAACCTATTGCCAGCTGCATCCCAAATCTGA  
GTTTGGAACCTCAGACATATGAACAGTGGGTGATCAGAGAAGAGAGAAGAGCTGCAAAAAGA  
AGAAAAGCGCAGGGAGCGTGTCTGTGCGGAACACTTGAAGAAATACAACGATGCTCTCCA  
GATCAATGACACCATCCGAATGGTGGATGCCTACAACCACCTAAATAACTTTTACGAAGAG  
GAGAAAAGTAAGAAGACAGTAAGGAGTGATGATGATGATGATGATGATGGGGATGATGAACCA  
GCAGTATCTAAACAGGATGAAACAGATGAATTTCTAATAGGTTTATTTTCATGCAAAAAAGAA  
ACAGCTGGAAGAGTTGACTGGAAAGCCAGAAAATGAAAATGAGAAGCTAATAAAGTTGAGA  
AATACTTTAATGGAGGAGTTCACAAAGACTGAGGAACCTCGAGGAATCATTTTACAAAGA  
CTCGTCTAAGTGCCCTTTGCTCTATTCCAGTGGATTAAGGACAACCCAAAATTTAAAGAAGTG  
GGAATTAGGGCCCATTATCTTATTGGCTCTGGACATAAGAGTGAAATGAAGCCCATGACTC  
AGAATGAGCAAAGAGAAGTTATTGATAAATTTGACGTGGAAATGTAAATTTACTAATTGCT  
ACTACTGTAGCTGAGGAAGGGCTGGACATCAAAGAGTGTAACATCGTTATACGCTACGGC  
CTCGTCACCAATGAAATTGCTATGGTGCAGGCTCGTGGTAGAGCTCGAGCTGATGAAAGC  
ACCTATGCTCTTGTGGCTTCGATTGGCTCAGGGGCTGTTGAACGTGAAGATGTTAATATGT  
TTCGTGAGAAAATGATGTATAAGGCCATTACAGCGTGTCCAGAAGATGCCACAGGAAGAGTA  
TTTAGAAAAGATTGAGAGTTTCCAGTTGCAAAGTGTAATGGAAAAACACATGAAGGCCAAAG  
AGAGATCAGCTCAAGACATACAAGAAAAATCCTTCACTAATAAAATTCTTATGCAAAAATTG  
CTCCAAGCCGATATGTTCTGGAGAAGACATACAAGTTATTGAAAACATGCATCATGTCACT  
GTGAAAAAAGATTTCCAAAGTCATTATCATACAAGAGAAAATAAAACGCTGCAGGATAAGCA  
AGCTGATTACCAGACAAATGGAGAAATTATATGCAAAGACTGCGGACAAGCTTGGGGAAAT  
ATGATGGTTCACCGAGGTCTTGACCTGCCTTGTCTAAAGATTAGAAATTTTGTGGTTGTGT  
TGCAGACAAGAAAACAACAAAGCAAATTTTAAAGAGATGGGGAGATCTTCCCATCAGGTTT  
CCTAGTTTTGATTATGCAGCTCATTGTCCTTCAAGCGATGAAGATTAA

>taeniopygia\_guttata-mda5

ATGGCAGACGGCACCCGGGACGAGCGGTTCCCTGTACATGATCTCCTGCTTCAGGCCGCG  
GCTGAAGCAGATCATCCAGGCGCAGCCCGTGCTGGACCAGCTCCCCTCGCTGAGCGCGG  
AGGACAAGGACAGGGTGCGTGCGGCCGCCCTGCAGCGCGGCGCGGCGGGCGCGG  
AGGAGCTGCTGCGGGCCGTGGAGCGGGGGCCCCGCGGCTGCGGCTGGATCCGCGAGTT  
CCTGCAGGCGCTGGAGCGCGGCGGCTGCAGCCTGGCCGCCTGCTACGCCAACCCACGC  
CTGAGCCAGCTGCCCTCGCCGGCAGAGGAGGCCGAGCACGACCTCTGCGTGCACCTGGT  
GCAGCTGCTGCACGGCACGCTGGTGGACAGGATGCGCGCCGTGCAGGTGGCCGAGAAG

TGCCTGCAGATGGGAATCTTCCAGGACGAGGACGTGGATCGGATCCAGACTGTTACTGAC  
AATCGTGGGAATAGAGATGGTGCAAGGGAGTTACTGAGCAGAATAGTCCAGAAAAAAGATT  
GGTTCTCTTCTTTTTTATTGCTCTCCGTGAAACCCAGCATGAAGACCTTGCAGATGATTTA  
AGTGGAAATACAGGAGAGAGTAAACAAAATGGGATGGAGCAGACTACAAATGAAGAAACA  
GAAGTTACAAGCCAGCCAGGAAACGTCATAGAGGAGAATTTGAAACAGGAAGAAAATGTG  
GATGATAGTTTCAGCAGTGAGAGCAGTCTGTTGGAAACATCCATAGAAAAGAATTCTGTGG  
TGTCAGAGTCAGATGTCTCCATAGGAGATGGAGGTGTCAGTAACTCGAATGAAAATCTGGA  
ACAGAGCAGCACAACCAGTGATTGAGATGAAGTGGAGAGGAGAGCCTCACCTGAGCCAGA  
TCTGACCCTGAGAGATTACCAGATGGAAGTGGCAAAGCCAGCATTGAATGGGGAGAATATT  
ATAATATGTCTCCCTACAGGCAGTGGTAAAACCAGAGTGGCAGTTTACATTACCAAAGATC  
ACTTGGATAAGAAGAAAAGAGCATCAGAGCCTGGAAAAGTCATAGTACTTGTTAATAAGGT  
TCCACTGGTAGAACAGCATTAAAAACAGAGTTTAGTCCATTCTGAAACGTTGGTATCAGG  
TTATTGGTTTAAGTGGTGATTCTCAGCTGAAAATCTCATTTCTGAAAGTTGTCAGAAGAAAT  
GATGTCATCATCAGTACAGCACAGATCCTTGAGAACTCACTTTTAAATGCATCCAAGGAAGA  
TGAAGAAAAGTGTCCACTTATCAGATTTTTCCCTCATCATCATCGATGAGTGTGTCATCACA  
CTC  
AAAAGGAAGGTGTCTACAATAATATAATGAGACGTTACTTAAAAGAAAAGATGAAGAACAGG  
AAGCTGGCAAAGGAAAACAAACCACTGATCCCACAGCCTCAGATTCTGGGACTTACAGCCT  
CACCTGGTGTAGGAGGTGCAACATCCTACTCAAAGCTGAAGAGCATATTCTGAAAATCTG  
TGCCAATCTTGATGCATGTAGAATTATGACTGTTGAGGAGCATGCCTCCAGCTAAAGAAT  
CAGGTGAAGGAACCATCTAAGAAGACTGTGATTGCAGATGACAAAAAAGGGATCCATTTA  
AAGAGAAAATTACTGAGATCATGACAGAAATACAAAACCTATTGCCAGCTGCATCCAAAGACT  
GAGTTTGGAACCTCAGACATATGAACAGTGGGTGATCAGAGAAGAGAAAAGAGCTGCAAAA  
GCAGAAAAACGCAGGGAACGTGTCTGTGCAGAGCACTTGAAGAAATACAATGATGCTCTC  
CAGATAAATGACACCATCCGAATGGTGGATGCCTACAATCTCCTAAATAACTTTTTATAAAG  
AGGAGAAAAGTAAGAAGACAGTAAGGAGTGATGATGATGATGATGATAAACCAGCAGTATCA  
AAACAGGATGAAACAGATGAATTTCTAATAGGCTTATTTTCATGCAAAAAAGAAACAGCTGAA  
AGAGTTGACTAGAAAACCAGAAAATGAAAATGAGAAGCTCATGAAGTTGAGAAATACTTTAA  
TGGAGGAGTTCACAAAGACTGAGGAACCTCGAGGAATCGTATTCACAAAGACTCGTCTAAG  
TGCTTTTGTCTTTTTCCAGTGGATTAAGGACAACCCAAAATTTGAAGAAGTGGGAATCAAG  
GCCATTATCTTATTGGCTCTGGACATAAGAGTGAAATGAAGCCCATGACTCAGAATGAGC  
AAAGGGAAGTAATTGATAAATTTGATGTGGAAATGTAAATTTACTAATTGCTACTACTGTA  
GCTGAGGAAGGCCTGGACATCAAAGAGTGTAACATTGTTATTCGCTATGGCCTCGTCACCA  
ATGAAATTGCCATGGTGCAGGCTCGTGGTAGAGCTCGGGCTGATGAAAGCACCTATGCTC  
TTGTTGTTTCAAGTGAATCAGGGGCTGTTGAACGTGAAAGTGTTAATTTATCGTGAGAAA  
ATGATGTATAAGGCTATTCAGCGTGTCCAGAAGATGCCACAGGAAGAGTATTTAAATAAGA  
TTCATAATTTCCAGTTGCAAAGTATAGTGGAACAAATGAAGGTGATGAGAGATCAGCG  
CAAGACATACAAGAAAAATCCTTCACTAATAAAATCTTATGCAAAAATTGCTCCAAGTCGAT  
ATGTTCTGGAGAAGACATACAAGTTATTGAAGACATGCATCATGTTAGTGTGAAAAAAGATT  
TCCAAAGTCTTTATCATATAAGAGAAAACAAAGCACTGCAAGATAAGCATGCTGATAACCAG  
ACAAATGGGGAAATTATATGCAAAGACTGTGGACAAGCTTGGGGAAATATGATGGTTCACC  
GAGGTCTTGACCTGCCTTGTCTAAAGATTAGAAATTTTGTGGTTGTGTTTGCAGACAAGAAA  
ATAACAAATGATATTTTTAAGAAATGGGGAGACCTGCCCATAGGTTTCCTAGTTTTGATTAT  
GCAAGTCATTGTCCTTCAAGTGACGAAGATTAA

>tauraco\_erythrolophus-md5

ATGGCCGAGGCGGCCCCGAGACGAGCGCTTCCTCTACATGATCTCCTGCTTCAGGCCGCG  
GCTGAAGCAGTTCATCCGGGTGCAGCCGGTGCTGGACCTGCTTCCCTCGCTGAGCGCGG  
AGGAGAGGGAGAAGGTGCGGGCGGCCGCCCTGCAGCGGGGCGAGGTGGCGGGGGCGG  
AGGAGCTGCTGCGGGCCGTGGAGCGGGGCCCCCGCGGGTGCGGCTGGTTCCACGAGTT  
CCTGCAGGCGCTGGAGCACGGCGGCTGCAGCCTGGCCGCCTGCTACGTGAACCCCAGCC  
TCAGCCAGCTGCCCTCGCCGGCCGAGGAGGCTGACAACGACCTTTGCGTGCACTTGGTG  
CAGCTGCTCCACAGCACGCTGGTGGATAGGATGCAGACCATGCAGGTTGCCGAGAAGTGT  
CTGCAGATGGGCATCTTCCAGGAGGAGGACCTGGATCGGATCCACACTGTTACTGACAAC  
CGTGGCAACAGAGATGGTGGAAAGGGAGCTATTAAGCAGAATAGTGCAAAAGAAAGATTGG  
TTCTCTCCTTTTCTGGTTGCTCTTCGTGAAACTCAGCATGGAGGCCTTGCAAGATGATTTAAG  
CGGAAACACAGGAGGAACAGAGAATAGACAAAATGGAATGAAGAACAGTACAAATGAAGA  
AACAGAAGTTACAAGCCAACAAGGATATGCCATAGTGGAGGATGTGAAACCACATGAAAT  
GTGAATGATAATTTAGTAGTGAGAACAGTGTATTGAAACATCTATGGGAAAGAATTCTGT  
AGTTTCAGAGTCAGATGTCTCCATAGGAGATGGAAGTGTGAGTAACCTTCAGTGAAATCCTG  
GGACAGAGCTGCACAACCAAGTGATTCCGATGAAGATGAAGTGGAGAGCAGAGCTTCACCT  
GAGCCAGATCTGATCCTGAGAGATTACCAGATGGAAGTTGCAAAGCCAGCACTGAATGGG  
GAGAATATTATAATATGTCTCCCTACAGGCAGTGGTAAAACCAGAGTGGCTGTTTACATTAC  
CAAAGATCACTTGGATAAGAAGAAAAGAGCATCAGAGCCTGGAAAAGTTATAGTACTTGTT  
AATAAGGTACCATTGGTAGAACAGCATTTAAGAAAGGAGTTTAATCCATTCTGAAGCGTTG  
GTATCAGGTTATTGGTTTAAGTGGTGATTCTCAATTGAAAATCTCATTTCTGAAGTTGTCA  
GAAGAAACGATGTCATCATCAGTACAGCACAGATCCTTGAGAATTCAGTGTTAAATGCAGC  
CAAAGAAGATGAAGAAGGTGTCCACTTATCAGATTTTTCTACTCATCATTATTGATGAGTGTC  
ATCACACTCAAAGGAAGGTGTCTACAACAATATAATGCGACGTTATTTAAAGAAAAGAAAG  
AAGAATGAAAAGCTAGCAAAGAAAACAAACCACTGATCCCACAGCCTCAGATTCTGGGAC  
TTACAGCTTCACCTGGTGTAGGAGGTGCAAAAACCAACTCAAAGCAGAACAACATATTCT  
GAAAATCTGTGCCAATCTTGATGCGCGTCAATCATGACTGTTCAAGAGCATGCCTCCCAA  
CTAAAGAATCAGGTGAAGGAACCATATAAGAAGACCGTGATTGCAGATGACAAAAGAAGGG  
ATCCATTTAGAGAGAGAATTACTGAGATCATGACAGATATTCAAAACCTATTGCCAGCTCCAT  
CCAAAATCTGAACTTGGAACCTAGCCATATGAACAGTGGGTGATTAGAGAAGAGAGAAAAG  
CTGCAAAAGAAGAAAAACGTAAGGAACGTGTCTGTGCAGAACACTTGAAGAAATACAATGA  
TGCTCTCCAGATAAATGACACCATCCGAATGGTAGATGCATACAATCACTTAAATAGCTTCT  
ATAAGGAGGAGAAAAGAAAAGAACAGTAAGGAGTGATGATGACGATGAACCAGCGGTAT  
CAAAACAGGATGAAACAGATGAATTTCTAATAGGTTTATTTTCATGCGAAAAAGAAACAACTG  
AAAGAGTTGGCTAGAAAGCCAGAATATGAAAACGAGAAGCTAATACAGTTGCGAAACACTT  
TAATGGAGGAGTTACGAAGACCGAGGAACCTAGAGGAATTATTTTCACAAAGACTCGGCT  
AAGTGCCTTTGCTCTATTCCAGTGGATTAAGGATAACCCAAAATTTGAAGAAGTGGAATTA  
AGGCCATTATCTTATTGGTGCTGGACATAACAGTGAAACTAAACCCATGACTCAGAATGA  
GCAAAGGGAAGTCATTGATAAATTCGAGGTGGAAGTGTAATTTACTTATTGCTACTACTG  
TAGCTGAGGAAGGCCTAGACATCAAAGAGTGTAACATCGTCATTGCTATGGCCTCGTCAC  
CAATGAAATTGCTATGATGCAGGCTCGTGGTCGAGCTCGAGCTGATGAGAGCACCTATACA  
GTTGTGGCTTCGAGTGGCTCAGGAGCTGTTGAACGTGAAGATGTGAATGTCTTCCGAGAG  
AACATGATGTATAAGGCCATTACAGCGTGTCCAGAACATGCCACAGGAAGAGTATTTAAATA  
AGATTCAGAATTTCCAGTTGCAAAGTATACTGGAAAAACAAATGAAGGCAAAGAGAGATCA  
GCGCAAGACATACAAGAAAAATCCTTCACTTATAACATTCCTATGCAAAAATTGCCACAAGC

TGATATGTTCTGGAGAAGATATTCAAGTTATTGAAAATATGCATCACGTCAGCGTGAAAAAA  
GATTTCCAAAGTCTCTACCCACACAAGAGAAAATAAGACACTGCAAGATAAGGACGCCGATT  
ACCAGACAAATGGGGAAATTATATGTAAAGATTGTGGACAAGCTTGGGGAAATATGATGGT  
TCACCGAGGTCTTGACCTGCCTTGTCTAAAGATTGAAATTTTGTAGTTGTGTTTGAAGACA  
AGAAAACAACAAAGCAAATTTTAAAGAAATGGGGAGAACTGCCAGTCAGGTTCCCTAGTTTT  
GATTATGCAGCTCATTGTCTTCAAGTGATGAAGATTAA

>tetrax\_tetrax-mda5

ATGGCAGCCGAATCCCGGGACGAGTGCTTCCTCTACATGATCTCCTGCTTCAGGCCGCGG  
CTGAAGCAGTTCATCCGGGTGCAGCCGGTGCTGGATCTCCTTCCCTCGCTGAGCGCCGAG  
GACAGGGAGAAGGTGCGGGCGGCCGCCCGGCAGCGGGGCGAGGTGGAGGGGGCGGAG  
GAGCTGCTGCGGGCCGTGGAGCGGGGGCCCCGCGGATGCGGCTGGTTCCACGAGTTCC  
TGCAGGCGCTGGAGAACGGCGGCTGCAGCCTGGCCGCCTGTTACGTGAACCCCAGCCTG  
AGCCAGCTGCCCTCCCCGGCCGAGGAGGCGGACCACGACCTCTGCGTGCACCTTGGTGCA  
GCTGCTCCACAGCACGCTGGTGGACAAAATGCAGAGCGTGCAGGTGGCCGAGAAGTGCC  
TGCAGATGGGCATCATCCAGGAGGAAGACCTGGATCGGATCCACACCGTTACCGACAATC  
ATGGGAACAGAGATGGTGCAAGGGAGCTATTGAGCAGAATAGTGCAGAAGAAAGATTGGT  
TCTCTCCTTTTTTGATTGCTCTGCGTGAAACCCAACATGGAGACCTTGCAGATGACTTAAGC  
GGAAATACAGGAGGAACAGAGAACAGACAGAATGGGATGCAGAACAGTACAAACGAAGAA  
ACAGAAGTTACAAGCCAACCAGAATACTCTGTAGTGGAGGATTTGGAACAGCAAGAAGATG  
TGAATGATAGTTTCAACAGTGAGAGCAGTGTATTGGAAAGATCTATTGGAAAGAATTCTGTA  
ATTTTCAGAGTCAGATGACTCCATAGGAAATGGAAGTGTGAGTTACTTGAATGAAAACCTGG  
GCCAGAGCTGCACAACCAAGTTCAGATGAAGATGAAGTGGAGAGCAGAGCTTCACCTGAGC  
CAGATCTGATCCTGAGAGATTACCAGATGGAAGTTGCAAAGCCAGCACTGAATGGGGAGA  
ATATTATAATATGTCTCCCTACAGGCAGTGGTAAAACCTAGAGTGGCTGTTTACATTACCAA  
GATCACTTGGATAAGAAGAAAAGAGCATCAGAGCTTGGAAAAGTTATAGTACTTGTTAATAA  
GGTACCATTGGTGGAAACAACATTTACGAAAGGAGTTCAATCCATTCTTGAAGCGTTGGTAT  
CAGGTTATTGGTTTAAGTGGTGATTCTCAGCTGAAAATCTCATTTCTGAAGTTGTCAGAAG  
AAATGATGTCATCATCAGTACAGCACAGATCCTTGAGAATTCAGTGTAAATGCAGCCGAA  
GAAGGTGAAGAAGGTGTCCACTTATCAGATTTTTCACTCATCATTATCGATGAGTGTATCA  
CACTCAAAAGGAAGGTGTCTACAACAATATAATGCGACGTTACTTAAAAGAAAAGATGAAGA  
ACAGAAAGCTGGCAAAAGAAAACAAACCACTGATCCCACAGCCTCAGATTTTGGGACTTAC  
AGCCTCACCTGGTGTAGGAGGTGCAAAATCCTACTCAAAAGCTGAAGAACATATTCTGAAA  
ATCTGTGCCAATCTTGATGCATGTAGACTCATGACTGTTGAAGAGCATGCCTCCCAATTGA  
AGAATCAGGTGAAGGAACCATATAAGAAGACTGTGATTGCAGATGACAAAAGAAGGGATCC  
ATTTAGAGAGAGAATTACTGAGATCATGACAGACATTCAAACTATTGCCAGCTCCATCCAA  
AATCTGAGTTTGGAACTCAGCCATATGAACAGTGGGTAAATTAGAGAAGAGAGAAGAGCTGC  
AAAAGAAGAGAAACGCAAGGAACGTGTCTGTGCGGAACACTTGAAGAAATACAATGATGCT  
CTCCAGATAAATGATACCATCAGAATGGTGGATGCATATAATCACCTAAATAACTTTTTATAA  
GGAGGAGAAAAGTAAGAAGACAGTAAGGAGTGATGATGATGATGATGATGAACCAGCAGT  
ATCAAAACAAGATGAAACAGATGAATTTCTAATAGGATTATTTAATGCAAAAAAGAAACAGC  
TGAAAGAGTTGGCTAGAAAGCCAGAATATGAAAATGAGAAGCTAATACAGTTGCGGAACAC  
TTAATGGAGGAGTTCACGAAGACTGAGGAACCTAGAGGAATTATTTTCAAAAGACTCGG  
CTAAGTGCCTTTGCACTATTCCAGTGGATTAAGGATAACCCAAAATTTGAAGAAGTGGGAAT  
TAAGGCCCATTTATCTTATTGGTGCTGGACATAACAGTGAAATTAAACCCATGACTCAGAATG

AGCAAAGGGAAGTTATTGATAAATTCCGAGGTGGAAATGTAAATTTACTTATTGCTACTACT  
GTAGCTGAGGAAGGCCTAGACATCAAAGAGTGTAACATCGTTATTCGCTATGGCCTTGTC  
CCAATGAAATTGCTATGGTGCAGGCTCGTGGTCGAGCTCGAGCTGATGAGAGCACCTATG  
CACTTGTGGCTTCAAGTGGCTCAGGAGCTGTTGAACGTGAAGATGTTAATATTTTCCGTGA  
GAAAATGATGTATAAGGCCATTACGCGTGTCCAGAAGATGCCACAGGAAGAGTATTTAAAT  
AAGATTCAGAATTTCCAGTTGCAAAGTATAGTGGAGAAACAAATGAAGGCAAAGAGAGATC  
AACGCAAGACGTACAAGAAAAATCCTTCACTAGTAACATTCTATGCAAAAATTGCCACAAG  
CTGATATGTTCTGGAGAAGACATACAAGTTATTGAAAACATGCATCATGTCAGCGTGAAAAA  
AGATTTCCAAAGTCTTTACCATACGAGAGAAAATAAGACACTGCAAGATAAGCATGCCGATT  
ACCAGACAAATGGGGAAATCGTATGTAAAGATTGTGGACAAGCTTGGGGAAATATGATGGT  
TCACCGAGGTCTTGACCTGCCTTGTCTAAAGATTAGAAATTTTGTGGTTGTGTTTGAAGACA  
AGAAAACAACAAAGCAAATTTTAAAGAAATGGGGAGAACTGCCCCGTCAAGTTCCTAGTTT  
GGATTATGCAGCTCATTGTCCTTCAAGTGATGAAGATTAA

>tyto\_alba-md5

ATGGCAAAGGAGTCCCGAGACGAGCGCTTCCTCTACATGATCTCCTGCTTCAGGCCGCGG  
CTGAAACAGTTCATCCGGGTGCAGCCGGTGCTGGACCAGCTCCCCTCGCTGAGCGCGGA  
GGAGAGGGGAGAAGGTGCGGGGCGGCCGCCCTGCAGCGGGGCGAGGTGGAGGGGGCGGA  
GGAGCTGCTGCGGGCCGTGGAGCGGGGGCCCCGCGGGTGCGGCTGTTCCACGAGTTC  
CTGCAGGCGCTGGAGCAGGGCGGCTGCAGCCTGGCCGCCTGCTACGTGAACCCAGCCT  
CAGCCAGCTGCCCTCGCCGGCCGAGGAGGCCGACCACGACCTCTGCGTGCACCTGGTG  
AGCTGCTCCACAGCACACTGGTGGAGAGAATGCAGACCATGCAGGTGGCCGAGAAGTGC  
CTACAGATGGGCATCTTCCAGGAGGAGGACCTGGACCGGATCCCACTGTTACTGACAAT  
CGTGGGAACAGAGATGGTGCAAGGGAGCTACTGAGCAGAATAGTGCAGAAGAAAGATTGG  
TTCTCTCCTTTTTTATTGCTCTGCGTGAAACCAACATGGAGACCTTGAGATGATTTAAG  
CGGAAATACGGGAGGAACAGAGAATAGACAAAATGGGATGAAGAACAGTACAAATGAAGA  
AACAGAAGTTACATGCCAACCAGGATATGCTGTAGTAGAGGATTTGAAACAGCAAGAAAAT  
GTGAATGATAGTTTCAGCAGTGAGAACAGTGTATTGGAATATCTATTGGAAATAATTCTTT  
GGTTTCAGAGTCAGATGTCTCCATAGGAGATGGAAGTGTGAGTAACTCAATGAAAACCTG  
GGGAAGAGCTTCACAACCAGTGATTGAGATGAAGAAGAAGAGGAGAGCAGAGCTTCACCT  
GAGCCAGATCTGATCCTGAGAGATTACCAGATGGAAGTTGCAAAGCCCGCACTGAATGGG  
GAGAATATTATCATATGTCTCCCTACAGGCAGTGGTAAAACCAGAGTGGCTGTTTACATTAC  
CAAAGATCACTTGGATAAGAAGAAAAGAGCATCAGAGCCTGGAAAAGTTATAGTACTTGTT  
AATAAGGTACCATTTGGTGGAAACAGCATTTACGAAAAGAGTTTAATCCATTCTGAAGCACTG  
GTATCAGGTTATTGGTTTAAAGTGGTGATTCTCAGCTGAAAATTTCAATTCCTGAAGTTGTCA  
GAAGAAATGATGTCATCATCAGTACAGCACAGATCCTTGAGAATTCAGTGTAAATGCAGAC  
AAAGAAGATGAAGAAGGTGTCCACTTATCAGATTTTTCACTCATCATAATCGATGAATGTCA  
TCACACTCAGAAGGAAGGTGTCTACAACAATATAATGCGACGTTACTTAAAAGAAAAGATGA  
AGAACAGGAAGTTGGCAAAAGAAAACAAGCCACTGATCCCACAGCCTCAGATTCTGGGAC  
TTACGGCCTCACCTGGTGTAGGAGGTGCAACATCCCCTTAAAAGCTGAAGAACATATTCT  
AAAAATCTGTGCCAATCTTGATGCATGTAGAATCATGACTGTTGAAGAGCATGCCTCCCAG  
TTGAAGAATCAGGTGAAGGAACCATATAAGAAGACTGTGATTGCAGATGACAAGAGAATGG  
ATCCATTTAGAGAGAGAATTACTGAGATCATGACAGACATTCAAACTATTGCCAGCTTCAT  
CCAAAATCTGAGTTTGGAACTCAGCCATATGAACAGTGGGTGATTAGAGAAGAGAGGAAAG  
CTGCAAAAGAAGAAAAACGCAAGGAACGTGTCTGTGCGGAACACTTGAAGAAATACAATGA

TGCTCTCCAGATAAATGACACCATCCGAATGGTGGATGCATACAATCACCTAAATAACTTTT  
ATAAGGAGGAGAGAAAAGTAAGAAGACAGTAAGGAGTGATGATGATGATGATGATGAACCAGT  
AGTATCAAAACAGGATGAAACGGATGAATTTCTAATAGGTTTATTTTCATGCAAAAAAGAAAC  
AGCTGAAAGAGTTGGCTAGAAAGCCAGAATATGAAAATGAGAAGTTAATACAGTTGCGAAA  
CACATTAATGGAGGAGTTCACGAAGACTGAAGAACCTAGAGGAATTATTTTCACAAAGACT  
CGGCTAAGTGCCCTTTGCTCTATTCCAGTGGATTAAAGATAACCCAAAATTTGAAGAAGTGG  
GAATTAAGGCCCATTTATCTCATTGGTGGCTGGCCATAACAGTGAAATTAACCCCATGACTCA  
GAATGAGCAAAGGGAAGTTATTGATAAATTCCGAGGTGGAAATGTAAATTTACTTATTGCTA  
CTACTGTAGCTGAGGAAGGCCCTAGACATCAAAGAGTGCAACATTGTTATTCGCTATGGCCT  
TGTCACCAATGAAATTGCTATGTTGCAGGCTCGTGGTCGAGCTCGGGCTGATGAGAGCAC  
CTATGCACTCGTGGCTTCGAGTGGCTCAGGAGCTGTTGAACGTGAAGATGTTAATATTTTC  
CGTGAGAAAATGATGTATAAGGCCATTCAACGTGTTGAGAAAATGCCACAGGAAGAATATT  
TATATAAGATTTCATAATTTCCAGTTGCAAAGTATAGTGGAACACAGATGAAGGTGAAGAGA  
GATCAACGCAAGACATACAAGAAAAATCCTTCACTGATAACATTCCTATGCAAAAATTGCCA  
CAAGCTAATATGTTCTGGAGAAGACATACAAGTTATTGAAAACATGCATCATGTGTCAGTGTGA  
AAAAAGATTTCCAAAGTCTTTACCATACAAGAGAAAAATAAGACATTGCAAGATAAGCATGCC  
GATTACCAGACAAATGGGGAAATTATATGTAAAGATTGTGGACAAGCTTGGGGAAATATGA  
TGGTTACCGAGGTCTTGACCTGCCTTGTCTAAAGATTAGGAATTTTGTGGTTGTGTTTGAA  
GACAAGAAAACAACAAAGCATATTTTAAAGAAATGGGGAGAACTGCCCATCATGTTCCCTA  
GTTTTGATTATGCAGCTCATTGTCCTTCAAGTGATGAAGATTAA

>upupa\_epops-md5

ATGGCAGAGACGTCCCGAGACGAGCGTTTCCTCTACATGATCTCCTGCTTCAGAGCGCGG  
CTGAAGCGGTTCAATTCGGGTGCAGCCGGTGCTGGACCGGCTCCCCTTGCTCAGCGCCGA  
GGAGAAGGAGAGAAAGTGCGGGCGGCCGCGGCGCAGCGGGGAGACGTGGCGGGGGCCGA  
GGAGCTGCTGCGGGCCGTGGAGCGGGGACCCCGCGGCTGCGGCTGGTTCCACGAGTTC  
CTGCAAGCACTGGAGTGCGGCGGCTGCAGCCTGGCAGCCTGCTACGTGAATCCCAGCCT  
CAGCCAACTGCCGTCGCCGGCCGAGGAGGCTGACCACGACCTCTGCGTGCACTTGGTGC  
AGCTGCTCCACAGCACGCTGGTGGATAGGATGCAGGCCGTACAGGTGGCCCAGAAGTGC  
CTGGAGATGGGCATCTTCCAGGAGGAAGACCTAGAGCGGATCTGTGCTGTTTCTGAGAAC  
CGTGGGAACAGAGATGGTGCAAGAGAGCTGTTGAGCAGAATAGTACAGAAGAAAGATTGG  
TTCTCTTCTTTTTTGCTTGCTCTGCGTGAAACCCAACACGGAGCCCTTGCAAGATGATTTAAG  
CGGAAATACAGGAGGAGAAAAGAAGATAGACAAAATGAAGTGAACAACAGTACAGACGAAGA  
AACAGAAGCTAGAAGTCAACCAGGATGTGCCGTAGGGGAAGATTTGAAACAGCAAGGAAA  
TGTGAATGATAATTTACCAGTGAGGACAGTGTTTTGGAAACTATTAGTCTGGAATCTGTTA  
GTAAAAATTCTGCAGTTTCAGagTCATATATCTTCACAGGAGGTGGAAGTGTGAGTAACCTG  
AATGAAAACCTGACACAGAGCAGCTCAACCAGTGACTCAGATGAAGATGAAGTGGAGAGC  
AGAGAGCCACCTCAGCCGGAGCTGATCCTGAGAGATTACCAGATGGAAGTTGCAAAGCCA  
GCACTGAATGGGGAGAATATTATAATATGTCTCCCTACAGGCAGTGGTAAACTAGAGTGG  
CTGTTTACATTACCAAAGATCACTTGGATAAGAAGAAAAGAGCATGTGAGCCTGGGAAAGT  
TATAGTACTTGTTAATAAGGTACCATTGGTAGAACAGCATTTACGAAAGGAGTTTAATCCAT  
TCCTGAAGCACTGGTATCGGGTTATTGGTTTAAAGTGGTGACACTCAGCTGAAAATCTCATT  
CCTGAAGTTGTCAGAAGATACGACGTGATCATCAGTACAGCACAGATCCTCGAGAATTCTC  
TGTTAAAGGCAACTGAAAAAGATGAAGAAGGTGTCCTTTATCAGATTTTTTCACTCATCATT  
ATTGATGAGTGTGATCACAACCTCAAAGGAAGGCGTCTACAACAATATAATGCGACGTTACTT

AAAAGAAAAGTTGAAGAACAGAAAGCTGGCAAAAGAAAACAAACCACTGATCCCACAGCCT  
CAGATTCTAGGACTCACAGCCTCACCTGGTGTCTGGAGGTGCAACATCCCACACAAAAGCT  
GAACAACATATTTTGAAGATCTGTGCCAATCTTGATGCCTGTAGAATCATGACTGTTGAAGA  
GCACACGTCTCAACTGAAGAACCAGGTGAAGGAACCATATAAGAAGACTGTGATTGCAGAC  
GACAAAAGAAGCGATCCGTTTAGAGAGCGAATTACTGAGATAATGACAGATATTCAAAATTA  
TTGCCAGCTCCAGCCAAAATCTGAGTTTGAAGCCAACCTTATGAACAGTGGGTGATTAGA  
GAAGAGAAGAGAGCTGCAAAAGAAGAGAAGCACAAGGAACGTGTCTGTGCAGAACATCTG  
AAGAAATACAATGATGCTCTTCAAATAAATGACACCATCCGAATGGTGGATGCGTACAATCT  
CCTGAATAACTTTTATAAGGAGGAGAAAATAAGAAGACTGTGAGGAGTGACGATGATGAT  
GATGAACCAGCAGTATCAAAACAGGATGAAACATACGAATTTCTAATGGGTTTATTCCATTC  
AAAGAAGAAACAGCTGAAAGAGTTGGCTAGTAAGCCAGAATATGAGAATGAGAAGCTAGTA  
ATGCTGCGAAACACTTTAATGGAGGAGTTCACAAAGACTGAAGAACCTAGAGGAATTGTTT  
TCACAAAGACGCGGCAAAGTGCCTTTTCTCTGTTCCAATGGATTAAAGATAACCCAAAATTT  
GAAGAAGTGGGAATTAAGGCCATTATCTCATCGGTGCTGGACATAACAGTGACACTAAAC  
GCATGACCCAGAATGAGCAAAGGGAAGTTATTGATAAATTCCGAAGTGGAATGTAAATTT  
ACTTATCGCTACTACTGTCTGCTGAGGAAGGCCTAGATATCAAAGAGTGTAACATCGTTATTC  
GCTATGGCCTCATCACCAATGAGATTGCTATGATGCAGGCTCGCGGTGAGCTCGAGCTG  
ATGTGAGCACCTATGCACTTGTGGCTCCAAGTAACCTCAAAGCTATTGTACGTGAAGATGT  
TAATATGTACCGTGAGAAAATGATGTATAAGGCCATTGAGCGTGTCCAGCAGATGCCAAAG  
GAAGACTATTTAAAGAAGATTCAGGCTTTCCAGTTGCAAAGCATAGTGGAAAAACAAATGAA  
GGCAAAGAGAGATGAGCGCAAAGCATACAAGAAAAACCCACTGCTGATAAAATTCCTATGC  
AAGAATTGCCACAAGCTGATAAGTTCTGGAGAAGACATACAAGTTATTGAAAACATGCATCA  
TGTCAGTGTGAAGAAAGATTTCCAAAGTCTTTACCATACAAGAGAAAAATAAGACAGACAATC  
ACGCTGATTACCGGACGAATGCAGAAATTATATGTAAAGACTGCGGACAAGCTTGGGGAAA  
TATGATGGTTCACCGAGGTCTTGATCTGCCTTGTCTAAAGATTAAGAATTTTGTGGTTGTGT  
TTGAAGACAAAAACCCAACAAAACAAATGTTTAAGAAATGGAATGAACTGAGCATCAGATTC  
CCTTCTTTTCGATTATGCAGCAAATTGTCCTTCAAGTGATGAAGATTAA

>uria\_lomvia-md5

ATGGCAGAGGGGTGCCGAGACGAGCGGTTTCTCTACATGATCTCCTGCTTCAGGCCGCG  
GCTGAAGCAGTTCATCCGGGTGCAGCCGGTGCTGGACCGGCTTCCCTCGCTGAGCCCGG  
AGGACAGGGAGAGGGTGCGGGCGGCCGCGCTGCAGCGCGGCGAGGTGGAGGGGGCGG  
AGGAGCTGCTGCGGGCCGTGGAGCGGGGTCCCCGCGGCTGCGGCTGGTTCCACGAGTT  
CCTGCAGGCGCTGGAGCAGGGCGGCTGCGGGCTGGCTGCCTGCTACGTGAACCCAGC  
CTCAGCCAGCTGCCCTCGCCGGCCGAGGAGGCCGACCTCTGCGTGCCTTGGT  
GCAGCTTCTCCACAGCACGCTGGTGGATAAGATGCAGACCGTGCAGGTGGCTGAGAAGTG  
CCTGCAGATGGGCATCTTCCAGGATGACGACCTGGATCGGATCCACACTGTTACTGACAAT  
CGTGGGAACAGAGATGGTGCAAGGGAGCTGTTGAGCAGAATAGTGCAGAAGAAAGACTG  
GTTCTCTCCTTTTTTGGTTGCTTTGCGTGAAACCCAACATGGAGACCTTGCAGATGATTTAA  
GTGGAAATACAGGAGAAACAGAGAATAGACAAAATGGGATGAAGAACAGTACAAACGAAG  
AAACAGAAGTTACAAGCCAACCAGGATATGCTGTAGCAGAGGATTTGAAACAGCAAGAAAA  
TGTGAATGGTAGTTTTGAGCAGTGAGAACAGTGTATCGGAAACATCTATTGAAAGAATTCT  
CTAGTTCCCGAGTCAGATGTCTCCATAGGAGATGGAAGTGTGAGTAACTTGAATGAAAACC  
TGGGACAGAGCTGCACAACCAGTGATTCAGAGGAAGATGAAGGGGAGAGCAGAGTTTCAC  
CTGAGCCAGATCTGATCCTGAGAGATTACCAGATGGAAGTTGCAAAGCCAGCACTGAATG

GGGAGAATATCATAATATGTCTGCCTACAGGCAGTGGTAAAACCAGAGTGGCTGTTTACAT  
TACCAAAGATCACTTGGATAAGAAGAAAAGAGCATCTGAGCCTGGAAAAGTTATAGTACTT  
GTTAATAAGGTACCGTTGGTAGAACAGCATTTACGAAAGGAGTTTAATCCATTCCCTGAAGC  
GTTGGTATCAGGTTATTGGTTTAAGTGGTGATTCTCAGCTGAAAATCTCATTTCCCGAAGTT  
GTCAGAAGAAATGACGTCATCATCAGTACAGCACAGATCCTTGAGAATTCAGTGTTAAATG  
CAGCCAAAGAAGATGAAGAAGGTGTCCACTTATCAGATTTTTCACTCATCATTATCGATGAA  
TGTCATCACACACAAAAGGAAGGTGTCTACAACAATATAATGCGACGTTACCTAAAAGAAAA  
GAGGAAGAACAGGAAGCTGGCAAAGGAAAACAAACCACTGATCCACAGCCGCAGATTCT  
GGGACTTACAGCCTCACCTGGTGTAGGAGGTGCAACATCCAACCTCAAAGCTGAAGAACA  
TATTCTGAAAATCTGTGCCAATCTTGACGCACGTAGAATCATGACTGTTAAAGAGCATGCCT  
CCCAACTGAAGAACCAGGTGAAGGAACCATATAAGAAGACTGTGATTGCAGATGACAAAAG  
AAGGGATCCATTTAGAGAGAGAATTACTGAAATCATGAGTGAGATTCAAACTATTGCCAG  
CTCTATCCAAAATCTGAGTTTGGAACCTCAGCCATATGAACAATGGGTGATTAGAGAAGAGA  
AAAAAGCTGCAAAAGAAGAAAAACGCAAGGAACGTGTCTGTGCAGAACACTTGAAGAAATA  
CAATGATGCTCTCCAGATAAATGACACCATCCGAATGGTGGATGCGTACAATCACCTAAAT  
AACTTTTATAAGGAGGAGAGAAAAGTAAGAAGACAGTAACGAGTGATGATGATGATGATG  
AACCAGCAGTATCAAAACAGGATGAAACAGATGAATTTCTAATGGGTTTATTTTCATGCAAAA  
AAGAAACAGCTGAAAGAGTTGGCTAGAAAGCCAGAATATGAAAATGAGAAGCTAGTACAGT  
TGCGAAACACTTTAATGGAGGAGTTCACGAAGACGGAAGAACCTAGAGGAATTATTTTCAC  
AAAGACTCGGCTAAGTGCCTTTGCTCTATTCCAGTGGATTAAGGACAACCCAAAATTTGAA  
GAAGTGGAATTAAGGCCATTATCTTATTGGTGCTGGACATAACAGTGAAATTAACCCAT  
GACTCAGAAATGAGCAAAGGGAAGTCATTGATAAATTCCGAGGTGGAAGTGTAATTTACTT  
ATTGCTACTACTGTAGCTGAGGAAGGCCTAGACATCAAAGAGTGTAACATCGTTATTCGCT  
ATGGCCTCGTCACCAATGAAATTGCTATGCTGCAGGCTCGCGGTGAGCTCGAGCTGATG  
AGAGCACCTATGCACTTGTGGCTTCGAGTGCCTCAGGAGCTGTTGAACGTGAAGATGTTAA  
TATTTTCCGTGAGAAAATGATGTATAAGGCCATTGAGCGTGTCCAGAACATGCCACAGGAA  
GAGTATTTAGAGAAGATTCAGAATTTGCAGTTGCAAAGTATCGTGGA AAAACAAATGAAGG  
CAAAGAGAGATCAGCAGAAGACATACAAGAAAACCCCTTCATTAGTAACTTTCCTATGCAAA  
AATTGCCACAAGCCGGTATGTTCTGGAGAAGACATACAAGTTATTGAAAACATGCATCATGT  
CAGTGTGCAAAAAGACTTCCAACTCTTTACCATACAAAAGAAAATAAGACACTGCAAGATA  
AGCATGCCGATTACCAGACAAATGGGGAAATTATATGTAAAGATTGTGGACAAGCTTGGGG  
AAATATGATGGTTCACCGAGGTCTTGATCTGCCTTGTCTGAAGATTAGAAATTTGTGGTTG  
TGTTTGAAGACAAGAAAACAACAAAGCACATTTTTAAGAAATGGGGAGAACTGCCCATCAG  
GTTCCCTAGTCTTGATTATGCAGCTCATTGTCCTTCAAGTGATGAAGATTAA

>zonotrichia\_albicollis-mda5

ATGGCAGAGGGCACCCGGGACGAGCTGTTCCCTATACATGATCTCCTGCTTCAGGCCGCGG  
CTGAAGCAGTTCATCCAGGTGCAGCCCGTGCTGGACCGGCTGCCCTCGCTGAGCGCCGA  
GGACCGGGACAGGGTCCGTGCGGCCGCGGAGCAGCGGGGCGCGGCGGGCGGCCGA  
GGAGCTGCTGCAGGCCGTGGAGCGGGGGCCCCGCGGCCGCGGCCCGATCCGCGAGTTC  
CTGCAGGCGCTGGAGTACGGCGGCTGCAGCCTGGCCGCTGCTACGCCAACCCAGCCT  
GAGCCAGCTGCCCTCGCCGGCAGAGGAGGCCGAGCACGACCTCTGCGTGACCTGGTG  
AGCTGCTGCACGGCACGCTGGTGGACAGGATGCGCGCCGGGCGCGGTGGCCGAGAAGTG  
CCTGCAGATGGAGATCTTCCAGGAGGAGGACGTGGAGCGGATCCAGACTGTTATTGACAA  
TCGTGGGAACAGAGATGGTGCAAGGGAGCTACTGAGCAGAATAGTCCAGAAGAAAGACTG



GTTCTCTTCTTTTTTATTGCCCTCCGTGAAACCCAACATGAAGACCTTGCAGATGATTTAA  
GTGGAAATACAGGAGAGAATAAACAAAATGGGATGGAGCAGACTACGAGTGAAGAAACAG  
AAGTTACAAGCCAACCAGGATACGTACAGAGGAGAATTTGAAACAGGAAGAAAATGTGGA  
TGACAGTTTCAGCAGTGAGAACAGTCTGTTGGAACATCCATAGAAAAGAATTCTGTGATG  
TCAGAGTCAGATGTCTCCATAGGAGATGGAAGTGTGAGTAACCTTGAATGGAACTTGGAA  
AGAGCTGCACAACCAGTGATTCAGATGAAGTGGAGAGGAGAGCCTCACCTGAGCCAGATC  
TGACCCTGAGAGATTACCAGATGGAAGTTGCAAAGCCAGCATTGAATGGGGAGAATATTAT  
CATATGTCTCCCTACAGGCAGTGGTAAAACCAGAGTGGCTGTTTACATTACCAAAGATCAC  
TTGGATAAGAAGAGAAGAGCATCAGAGCCTGGAAAAGTCATAGTACTTGTAAATAAGGTTT  
CATTGGTAGAACAGCATTTAAAAAGAGAGTTTAGTCCATTCTGAAGCGTTGGTATCAGGTT  
ATTGGATTAAGTGGTGATTCTCAGCTGAAAATCTCATTTCTGAAGTTGTCAGAAGAAATGA  
TGTCATCATCAGTACAGCACAGATCCTTGAGAATTAAGTGTAAATGCATCCAAGGAAGATG  
AGGAAAGTGTCCACTTATCAGATTTTCCCTCATCATCATCGATGAGTGTGATCATACTCAA  
AAGGAGGGTGTCTACAATAACATAATGAGACGTTACTTAAAAGAAAAGATGAAGAACAGGA  
AACTGGCAAAAGAAAACAAGCCACTGATCCACAGCCTCAGATTCTGGGACTTACAGCCTC  
ACCTGGTGTAGGAGGTGCAACATCCTACTCAAAGCTGAAGAGCATATTCTGAAAATCTGT  
GCCAATCTTGATGCATGTAGGATTATGACTGTTGAAGAGCATGCCTCCCAGCTAAAGAATC  
AGGTGAAGGAACCATCTAAGAAGACTGTGATTGCAGATGATAAAAAAAGGGATCCATTTAA  
AGAGAGAATCACTGAGATCATGACAGAAATTCAGAACTATTGCCAGCTGCATCCGAAGTCT  
GAGTTTGGAACTCAGACATATGAACAGTGGGTGATCAGAGAAGAGAGAAGAGCTGCGAAA  
GAAGAAAAACGGAGGGAACGTGTCTGTGCAGAGCACTTGAAGAAATACAATGATGCTCTC  
CAGATAAATGACACCATCCGAATGGTGGATGCCTACAATCACCTAAATAACTTCTATAAAGA  
GGAGAAAAGTAAGAAGACAGTAAGGAGTGTGATGATGATGATGAACCAGCAGTATCAAAA  
CAGGATGAAACAGATGAATTTCTAATAGGTTTATTTTCATGCAAAAAAGAAACAGCTGAAAGA  
GTTGACTAGAAATCCAGAAAATGAAAATGAAAAGCTAACGAAGTTGAGAAATACTTTAATGG  
AGGAGTTCACGAAGACTGAAGAACCTCGAGGAATCATTTTCACAAAGACTCGTCTAAGTGC  
CTCTGCTCTTTGCCAGTGGATTAAGGACAACCCAAAATTTGAAGAAGTGGGAATTAAGGCC  
CATTATCTTATTGGCTCTGGACATAAGAGTGAACAAAGCCCATGACTCAGAATGAGCAAA  
GGGAAGTTATTGATAAATTTGATGTGGAAATGTAAATTTACTAATTGCTACTACTGTAGCT  
GAGGAAGGCCTGGACATCAAAGAGTGTAAACATCGTTATTCGCTACGGCCTCGTCACCAAT  
GAAATTGCTATGGTGCAGGCTCGCGGTAGAGCTCGAGCTGATGAAAGCACCTATGCTCTT  
GTGGCTTCAGATGGCTCAGGGGCTGTTGAACGTGAGAATGTTAATATTTTTTCGTGAGAAAA  
TGATGTACAAGGCCATTACGCGTGTCCAGAAGATGCCACAGGAAGAGTATTTAAATAAGAT  
TCAGAGTTTCCAGTTGCAAAGTATAGTGGAAAAACAAATGAAGGTGGTGAGAGACCAGCGC  
AAGACATACAAGAAAAATCCTTCACTAATAAAATTCTTATGCAAAAACTGCTCCAAGCCGAT  
ATGTTCTGGAGAAGACATACAAGTTATTGAAGACATGCATCATGTGAGTGTGAAAAAAGATT  
TCCAAAGTCTTTATCATAACAAGAGAAAATAAAACACTGCAAGATAAGCATGCTGATTACCAG  
ACAAATGGGGAAATTATATGCAAAGACTGTGGACAAGCTTGGGGAAATATGATGGTTCACC  
GAGGTCTTGACCTGCCTTGTCTAAAGATCAGAAATTTTGTGGTTGTGTTTGCAGACAAGAAA  
ACAACAACAATATTTTTAAGAAATGGGGAGACCTGCCCATCAGGTTTCTAGTTTTGATTA  
TGCAGCTCATTGTCCTTCAAGTGATGAAGATTAA

>zosterops\_pallidus-mda5

ATGGCAGAGAGCAGCCGGGACGAGCGGTTCTGTACATGATCTCCTGCTTCAGGCCGCG  
GCTGAGGCGGTTTCATCCAGGTGCAGCCCGTGCTGGACCGGCTGCCGTGCTGGGCGCG

GAGGAGCGGGAGCGGGTGCGGGCGGCCGCGCAGCAGCGGGGAGAGGTGGCGGGCGCC  
GAGGAGCTGCTGCGGGCCGTGGAGCGGGGCCCCGCGGCTGCGGCTGGATCCGCGAGT  
TCCTGCAGGCGCTGGAGCACGGGGGCTGCAGCCTGGCCGCCTGCTACGCCAACCCCAGC  
ATGAGCCTGCTGCCCTCGCCGGCGCAGGAGGCCGAGCACGACCTGTGCGTGACCTGGT  
GCAGCTGCTGCACGGCACGCTGGTGGACAGGATGCGCGCCGTGCCCCTGGCCGAAAAGT  
GCCTGGAGATGGGAATCTTCCAGGACGAGGACATGGAGCGGATCCAGACTGTTACTGACA  
ATCGTGGAACAGAGATGGTGCAAGGGAGCTGCTGAGCAGAGTAGTCCAGAAGAAAGATT  
GGTTCTCGCCTTTTTTGGTTGCTCTCCGTGAAACCCAACATGAAGACCTTGCAGATGATTTA  
AGTGGTAATACAGGAGAGAATAAAACAAAATGGGATGGAGCAGACTACAAATGAAGAGACA  
GAAGTTACAAGCCAACCTGGACACGCCATAGAGGAGAATTCGAAACTGGAAGAAAATGTG  
GATGACAGTTTCAGCAGTGAGAACAGTGTGTTGGAAACATCTATAGAAAAGAATTCTATCGT  
GTCAGAGTCAGATGTCTCCATAGGAGATGGAAGTGTGAGTAACCTGAATGAAGACCTGGGA  
GAGAGCTGCACAACCAAGTGATTCAGATGAAGTGGAGAGGAGAGCCTCACCTCAGCCAGAT  
CTGACCCTGAGAGATTACCAGATGGAAGTTGCAAAGCCAGCACTGAGTGGGGAGAATATT  
ATAATATGTCTCCCTACGGGCAGTGGTAAAACCAGAGTGGCTGTTTACATTACCAAAGATC  
ACTTGGATAAGAAGAGAAGAGCATCAGAGCCTGGAAAAGTCATAGTACTTGTTAATAAGGT  
TCCATTGGTAGAACAAACATTTACAAACAGAGTTTAGTCCATTCCCTGAAGCGTTGGTATCAGG  
TTATTGGTTTAAGTGGTGATTCTCAGCTGAAAATCTCATTTCCCTGAAGTTGTCAGAAGAAAT  
GATGTCATCATCTGTACAGCACAGATCCTTGAGAATTCAGTGTAAATGCATCCAAGGAAGA  
TGAAGAAGGTGTCCACTTATCAGATTTTTCCCTCATCATTATCGATGAGTGTGTCATCACACTC  
AAAAGGAGGGTGTCTACAACAATATAATGCGACGTTACTTAAAAGAAAAGATGAAGAACAG  
GAAGCTGGCAAAAGAAAACAAACCACTGATCCACAGCCTCAGATTCTGGGACTTACAGCC  
TCACCTGGTGTAGGAGGTGCAAAAACCTCCTCGAAAGCTGAAGAGCATATTTTGAAAATCT  
GTGCCAATCTCGATGCATGTAGAATTATGACTGTTGAAGAGCATTCCCTCCCAGCTAAAGAA  
TCAGGTGAAAGAACCGTCTAAGAAGACTGTGATTGCAGATGACAAAAAAGGGATCCATTT  
AAAGAGAAAATTATTGAGATCATGACAGAAATACAAAACCTATTGCCAGCTGCATCCCAAGTC  
TGAGTTTGGAACCTCAGACATATGAGCAGTGGGTGATCAGAGAAGAGAGAAGAGCTGCAAA  
AGAAGAAAAGCGCAGGGAACGTGTCTGTGCAGAACACTTGAAGAAATACAATGATGCTCTC  
CAGATAAATGACACCATCCGAATGGTGGATGCCTACAATCACCTAAATAGCTTTTATAAAGA  
GGAGAAAAGTAAGAAGACAGTAAGGAGTGATGATGATGATGATGATGATAATGATGAA  
CCAGCAGTATCTAAACAGGATGAAACAGATGAATTTCTAATAGGTTTATTTTCATGCGAAAAA  
GAAACAGCTGGAAGAGTTGACTGGAAAGCCAGAAAATGAAAATGAGAAGTTAATAAAGTTG  
AGAAATACTTTAATGGAGGAGTTCACAAAGACTGAGGAACCTCGAGGAATCATTTTCACAA  
AGACTCGTCTAAGTGCCTTTGCTCTATTCCAGTGGATTAAGGACAACCCAAAATTTGAAGAA  
GTGGGAATTAGGGCTCATTATCTTATTGGCTCTGGACATAAGAGTGAAATGAAGCCCATGA  
CTCAGAATGAACAAAGGGAAGTCATTGATAAATTTGACGTGGAAATGTAAATTTACTAATT  
GCTACTACTGTAGCTGAGGAAGGCCTGGACATCAAGGAATGTAAACATCGTAATTCGCTATG  
GCCTCGTCACCAATGAAATTGCTATGGTGCAGGCTCGTGGTAGAGCTCGAGCTGATGAAA  
GCACCTATGCTCTTGTGGCTTCAACTGGCTCAGGGGCTGTTGAACGTGAAGATGTTAATAT  
GTTTCGTGAGAAAATGATGTATAAGGCCATTCAGCGTGTCCAGAAGATGCCACAGGAAGAG  
TATTTAAATAAGATTGAGAGTTTCCAGTACCAAAGTATAGTGGA AAAACAAATGAAGGCAAA  
GAAGGATCAGCTCAAGACATACAAGAAAAATCCTTCACTAATAAAATTCTTATGCAAAAATT  
GCTCCAAGCCGATATGTTCCGGAGAAGACATACAAGTTATTGAAAACATGCATCATGTCAG  
TGTGAAAAAAGATTTCCAAAGTCATTATCATACAAGAGAAAAACAAAACACTACAGGATAAGC

AAGCTGATTACCAGACAAATGGGGAAATTATATGCAAAGACTGTGGACAAGCTTGGGGAAA  
TATGATGGTTCACCGAAGTCTTGACCTGCCTTGTCTAAAGATTAGAAATTTTGTAGTTGTGT  
TTGCAGACAAGAAAACAACAAAGCAAATTTTTAAGAGATGGGGAGACCTGCCCATCAGCTT  
TCCTACTTTTGATTATGCAGCTCATTGTCCTTCAAGTGATGAAGATTAA

>accipiter\_nisus-rig1

ATGACGGCGGAGGAGAAGAGGAGCCTGCAGTGCTACAGGCGGTACATCGAGAAGAGCCT  
GAACCCCGTCTACATCCTGGGCAACATGACGGACTGGCTGTCCGACGAGGTGAAGGAGA  
GAGTCCGGAAGGAGGAGGAGAAGGGGGTGACGGCGGCCGCCGCGCTGTTCTCGACGC  
CATCCTGCAGCTGGAGGCGGAGGGCTGGCTGCGGGGCTTCCTGGACGCCCTGGTTGCAG  
CAGGGTACACCGGACTGGCAGAAGCAATTGAAAACCTGGGACTTCAGCAAACCTGGAAAAAC  
TAGAGTTGCACAGACAGCTGTTGAAGCGGATAGAAGCAACAATGCTAGAAGTTGATCCGGT  
AGCACTCATGCCGTACATAAACATGTGCCTGATAGAAAGGGAGTGTGAGGAGATCCTGCA  
GGTCAGCGAATACAGAAGCAAAGCAGCTGGGATAACTAACTCATTGAATGTCTCTGTCTGA  
TCGGATAAGGAAAACCTGGCCAAAAAGTCTTCAGCTAGCACTAGATAACACAGGATATTACA  
ATGCAAGTGAACCTGTGGGATATAAGAGAAGATAATGGCAAAGATGTGGATGGTGAAATGAC  
AGATGCCTGTGAGAACAGCTTTGAAACCGTGGTGACATTTTCTGAAGAAGCAGAATGTGAT  
AATAATCTCAGTGAATCTCTGTTCAGCTTCAGAAGGGATCTATCAGTCTTCACGTGTTTA  
TGAACCAAAGAAGGCTCGGAGCTACCAGACTGAACTTGCGCAGCCTGCTATCAACGGGAA  
AAACACATTGATATGTGCCCTACAGGATCTGGAAAAACCTTTGTGGCGATTCTGATTTGTG  
AACACCATTTCAAAACATGCCCTCAGGACAAAAGGCAAAAAGTTGCCTTTCTTGCAACCAA  
AGTGCCAGTGTACGAACAACAGAAAACCTGTATTCAAGCAGCATTTTGAAGAAGTGATAT  
TCTGTTCAAGGAATTAGTGGTGAAACAGTTGCAAATGTCTCCGTAGAAAAGGTTATACAGG  
ACAGTGACATCATTGTGCTAACACCCCGAGATTCTTGTAATAGCATTGAGGAAGGGATCCT  
TGGCTCCCTCTCCATCTTCACTCTGATGATATTTGATGAGTGCCACAACACTACGGGCAAT  
CACCTTACAATGTGTTAATGAGTAGATACCTGGAACAAAAATTTGACTGTGCAAGCCAGCT  
GCCTCAGATTGTAGGTTTAACTGCTTCTGTTGGAGTTGGTAATGCCAAGACCACCAAGGAA  
ACAATAGAGCACATCTGTACCCTCTGCTCCTACCTTGACATAAAGGCCATATCCACTGTCA  
GAGAGAACAACAGGATCTGCAGAGATTTGCAAACAAGCCAGAAACACATGTCAGATGGG  
TTAAATGCGAGTTCAGAATCACTTTGCAGACATTATCTCAGGTCTGATGTCTGAGACAGAG  
GCGTTGATGAGGAGGATTTACTCAGTGACACTATCTCCCAAATCAACAAGAATGATTTTG  
GAACACAGAAATATGAACACTGGATAATTGCCACTCAGAAGAAATGCAGGCTGTTGCAACT  
GGAAGATAAGGAGAAGGAAAGCAGCATTTGTAGACACCTTTTCATTTGCACTGAACACCTG  
CGGAAATTCAACGATGCTCTTATCATCAGTGAAGATGCCCGCATTGAAGATGCTTTAGCCT  
ACCTAACTGAATTTTTACAAATGTCAAAAATGGACCATATACAGAGTTAGAGAAGAACTG  
ACAGCCAAATTTCAAGAGAAAGAACCAGAACTGACTGCCCTTTCAAAGATGAGTCAAATG  
AGAATCCTAAGCTGGAAGAGCTTGCTTGATCCTGGAGGAAGCATACCGCTATAACCCAGA  
GACTCACACTCTTCTCTTTGCTAAGACAAGAGCCTTAGTAGCTGCTTTGAAAAAGTGGATAG  
AAGCAAACCTCTACTTAGCTACATAAAGCCAGGTGTGTTGATGGGTCGTGGAAGAAGAGA  
TCAAAAAACAGGTATGACCCTCCCAATGCAGAAGGGTGTGCTGGATGCATTCAAACCAAC  
AAAGAGAACAGACTGCTAATTGCTACATCTGTTGCTGATGAAGGCATTGATATTTCTGAGTG  
CAACCTTGTTGTGCTCTATGAATACTTCGGTAATGTCACCAAAATGATCCAAGTCAGAGGTC  
GTGGAAGGGCAAAAGACAGCAAGTGATCCTTGTGACAAGCAAAACAGAAGTGGTTGAGA  
ATGAGAAACACAACCGTTACAAGGAAGAAATGATGAATGAAGCTATTGAAAAGCTACAGAG  
TTGGGATGAAACAACATTTGCAAGAAAGATACATGACCTGCAAATGAAGGAAAAGGTATTA

AGAGATTCCAGGAAGAAAGAAACAAAAAGTAAGGTAGTGGAAGGGAAAAAAATCTTCTGT  
GTGGAAAATGCAAAGCATATGCCTGCAGTACAGATGACATCAGAGTTATAAAGGAATCTCA  
TCACACTGTCCTAGGAGACGCGTTCAAGGAGCGTTATATAACAAAGCCTCACCATAAACCA  
GTCCAGTTTGATTGTTTTGAGAAAAAAGCAAGATGTATTGCCAAAATACTAATTGCCAGCA  
TGA CTGGGGAATCATAGTGAAGTACAAAACATTTGATAATCTACCAGTGATCAAAATCAAAA  
GCTTTGTATTAGAGAATGTTGAAACTGGGACACAAATGGATTTTCAGAAATGGAAGAATATT  
AATTTTCTTTGAAGAATTTTGATGTTGAAGAAACATT CAGCTGA

>acridotheres\_javanicus-rig1

ATGACGGCGGAGGAGAAGCAGAACCTGCGCTGCTACCGGCGCTACATCGAGAGGAGCCT  
GAACCCCGTCTACGTCTCAGCAACATGACGGACTGGCTGTCCGACGAGGTGAAGGAGA  
GGGTT CGAAAGGAGGAGGAGAAGGGGGTGACGGCGGCCGCCGCGCTGTTCTGGATGC  
CGTGCTGCTGCTGGAGGCGGAGGGCTGGCTCCGGGGCTTCCTGGATGCCCTGGTTGCCG  
CAGGTTACACTGGATTGGCAGAAGCAATTGAAAAC TGGGACTTCAGCAAGCTGGAAAACT  
TGAGCTGCACAGGCAGCTGTTGAAGCGGATAGAAGCAACAATGCTAGAAATTGATCCTGTA  
GCAATCATGCCATACATAAACACATGCCTGATAGACAGGGATTGTGATGAGATACTGCAGA  
TCAGTGAATACAGAAGCAAAGCAGCTGGGATAACCAAAC TCAATTGAATGCCTCTGTGCTC  
TGACAAGGAAAACTGGCCCAAAAGTCTTCAGCTGGCACTGGATAATGCAGGATATTACAAT  
GCAAGTGAAC TGTGAATATAAGAGAAGATAATGGCAAAGATGTGCGATAGTGAAATGACAG  
ATGCCTCGGAGAATTACTTTGAAACCATGATGACATTTTCTGAAGAAGCAGAATGTGATAAT  
CTTGGTGAAAATCTCTCTCCAGTTTCAGAAAGCGCCTATGAGTCTTCATCTGTTTATAAACC  
AAAGAAGGCTCGGAGCTACCAGATTGAGCTTGCAGAGCCTGCTATTGATGGGAAAAACAC  
ATTGATTTGTGCCCCACAGGATCTGGAAAACTTTTGTGGCACTTCTGATTTGCGAACATC  
ATTTGCAAAACGTTCCCTCAGGACGAAAGGCCAAAAGTTGTCTTCCTTGCAACCAAAGTGCC  
AGTGTATGAGCAACAGAAAAATGTATTCAGGCAGCATTTTCGAAAGAAGTGGATACTCCGTT  
CAAGGAATTTGTGGTGAAACAGTAGCAAATATCTCTATAGAAAATGTTATACGGGACAGTGA  
CATCATCGTGCTAACTCCCCAGATTCTTGTGAATAGCATGGAGAAAGGGGTCCTTAGCTCC  
CTCTCCATCTTCACTCTGATGATATTTGATGAGTGCCACAACACTACAGGCAACCACTTA  
CAATGTGTTGATGACCAGATACCTGGATCAAAAATTTGACTCCTCTGCAACCACTGCCT  
CAGATTGTAGGTTTAACTGCTTCTGTTGGAGTTGGTAATGCCAAGAGCACTAATGAACTGT  
GGAGCACATCTGTACCCTCTGCTCCTACCTGGACATACAGGCCATATCCACTGTCAGAGAG  
AACAAACAAGATCTGCAAAGGTTTGGAACAAGCCAGAAACACATATCAGATGGGTAAAAA  
CGCGACCTCAGAATCACTTTGCAGACATTATCTCAGGTCTGATGTCTGAGACAGAGATGTT  
GATGAGGAAGATTTACTCAGTGGATACCATCTCCCAAATCAACAAGAATTACCTTGGAACA  
CAGAGATATGAACAATGGATAGTTTCTACTCAGAAGAAGTGTAGACTATTGCAACTGGAAG  
ATAAAGAGAAGGAGAGCAGTATTTGTAGAGACCTTTTCATTTGACTGAACACTTGCGGAAA  
TTCAACGATGCTCTGATTATCAGTGAAGATGCCCGCATAGAAGATGCTTTAGCCTACCTAAA  
TGAATTTTTCACAAATGTAAAAAATGGACCATATACAGAGTTGGAGAAGCAACTGACGGAG  
AAATTTCAAGAGAAAGAGCTAGAACTGACTGCCCTTTCAAAGATGAGTCAAATGAGAATC  
CAAAGTTGGAAGAGCTTGCTTGCATCCTGGACGAAGCATACCGCTACAACCCAGAGACTC  
GCACTATTCTCTTTGCCAAGACAAGAGCCTTAGTAGCTGCTTTGAAGAAGTGGATAGAAGC  
AAACCTTTACTTAGCCACATAAAGCCAGATGTGTTGATGGGTAAGGGAAGAAGAGACCAT  
AAACAGGTATGACCCTGCCAATGCAGAAGGGTGTACTGGATGCATT CAGAAACGACAAA  
GACATCAGACTGCTAATTGCTACATCTGTTGCTGATGAAGGCATTGATATTACTGCGTGCAA  
CCTTGTCGTGCTCTATGAATACTTTGGTAATGTCACCAAAATGATCCAAGTCAGAGGTCGT

GGAAGGGCAAGAGACAGCAAGTGCATCCTTGTGACAAGCAAAACAGAAGTGGTTGAGAAT  
GAAAACTAAACCGTTACAAGGAAGAAATGATGAATGCAGCTATTGAGAAGCTACAGAACT  
GGGATGAAACAACATTTGCAAGAACGATATGTGCGCCTGCAAAGGAGGGGAAAAGGTACTAC  
GAGATTCCAAGAAGAACGAAACAAAACCTGAAGTAGTGGAAGGGGAAAAAATCTTTTGTG  
TGGAAAATGCAAAGTGTATGTGTGCAGTACAGATGACATCAGAATTATAAAGGAATCTCATC  
ACACTGTCCTGGGTGACACGTTCAAGGAACGTTATATAACAAAACCCACAGGAAACCAGT  
TCAGTTTGACGATTTTCAGAAAAAAGCAAGATGCATTGCCGAAATGCTGAGTGCCAGCAT  
GACTGGGGGATCACAGTGAAGTACAAGACATTTGATAATCTACCAGTGATCAAAATCAAAA  
GCTTTGTACTAGAGGACATTGAACTGGGACACAAATGGATTCTCAGAAATGGAAAAATATT  
AATTTGTCTTTGAAGAATTTTGATGAAGAAGCATTTCAGCTGA

>aegyptius\_monachus-rig1

ATGACGGCGGAGGAGAAGCGGAGCCTGCAGTGCTACAGGCGGTACATCGAGAAGAGCCT  
GAACCCCATCTACATCCTGGGCAACATGACGGACTGGCTGTCCGACGAGGTGAAGGAGAG  
AGTCCGGAAGGAGGAGGAGAAGGGGGTGACGGCGGCCGCCGCGCTGTTCTTGACGCC  
ATCCTGCAGCTGGAGGCGGAGGGCTGGCTGCGGGGCTTCCTGGACGCCCTGGTTGCAGC  
AGGGTACACTGGACTGGCAGAAGCAATTGAAACTGGGACTTCAGCAAACTGGAAAACTA  
GAGTTGCACAGACAGCTGTTGAAGCGGATAGAAGCAACAATGCTAGAAGTTGATCCGGTA  
GCACTCATGCCGTACATAAACATGTGCCTGATAGAAAGGGAGTGTGAGGAGATCCTGCAG  
GTCAGCGAATACAGAAGCAAAGCAGCCGGGATAACTAACTCATTGAATGTCTCTGTGAT  
CGGATAAGGAAAACCTGGCCAAAAAGCCTTCAGCTAGCACTAGATAACACAGGATATTACAA  
TGCAAGTGAACGTGTGGGATATAAAAGAAGATAATGGCAAATATGTGGATGGTGAAATGACA  
GATGCCTCTGAGAACAGCTTTGAACTGTGGTGACGTTTTCTGAAGAAGCAGAATGTGATA  
ATAATCTCAGTGAAAATCTCTGTTTCAGCTTCAGAAGGGATCTATCAGTCTTCACCTGTTTAT  
GAACCAAAGAAGGCTCGGAGCTACCAGACTGAACTTGCGCAGCCTGCTATCGATGGGAAA  
AACACATTGATATGTGCCCTACAGGATCTGGAAAACTTTTGTGGCACTTCTGATTTGTGA  
ACACCATTTCCAAAACATGCCCTCAGGACAAAAGGCGAAAGTTGTCTTTCTTGCAACCAA  
GTGCCAGTGTACGAACAACAGAAAACCTGTATTCAAGCAGCATTTTGAAAGAAGTGGATATT  
CTGTTCAAGGAATTAGTGGTGAAACAGTTGCAAATGTCTCCGTAGAAAAGGTTATACAGGA  
CAGCGACATCATTGTGCTAACACCCCAAGATTCTTGTAATAGCATTGAGGAAGGGATCCTT  
AGCTCCCTCTCCATCTTCACTCTGATGATATTTGATGAGTGCCACAACACTACGGGCAATC  
ACCCTTACAATGTGTTAATGAGTAGATACCTGGAACAAAAATTTGACTCTGCAAGCCAGCTG  
CCTCAGATTGTAGGTTTAACTGCTTCTGTTGGAGTTGGTAATGCCAAGAGCACCAAGGAAA  
CGATAGAGCACATCTGTACCCTCTGCTCCTACCTTGACATACAGGCCATATCCACTGTCAG  
AGAGAACAAACAGGATCTGCAGAGATTTGCAAACAAGCCAGAAACATATGTCAGATGGGTT  
AAAATGCGAGTTCAGAATCACTTTGCAGACATTATCTCAGGTCTGATGTCTGAGACAGAGG  
CGTTGATGAGGAGGATTTACTCAGTGGACAATATCTCCCAAATCAATAAGAATGATTTTGG  
ACACAGAAATATGAACACTGGATAGTTGCCACTCAGAAGAAATGCAGGCTGTTGCAACTGG  
CAGATAAGGAGAAGGAGAGCAGCATTGTAGAGACCTTTTCATTTGCACTGAACACCTGCG  
GAAATTCAACGATGCTCTCATCATCAGTGAAGATGCCCGCATTGAAGATGCTTTAGCCTAC  
CTAACTGAATTTTTCACAAATGTCAAAAATGGACCATATACAGAGTTAGAGAAGAACTGAC  
AGCCAAATTTCAAGAGAAAGAACCAGAACTGACTGCCCTTTCAAAGATGAGTCAAATGAG  
AATCCTAAGCTGGAGGAGCTTGCTTGATCCTGGAGGAAGCATACCGCTATAACCCAGAG  
ACTCACACTCTTCTCTTTGCTAAGACAAGAGCCTTAGTAGCTGCTTTGAAGAAGTGGATAGA  
AGCAAACCCTCTACTTAGCCACATAAAGCCAGGTGTGTTGATGGGTCGTGGAAGAAGAGAT

CAAAAAACAGGTATGACCCTCCCAATGCAGAAGGGTGTGCTGGATGCATTCAAAACCAACA  
AAGAGAACAGACTGCTAATTGCTACATCTGTTGCTGATGAAGGCATTGATATTTCTGAGTGC  
AACCTTGTTGTGCTCTATGAATACTTCGGTAACGTCACCAAAATGATCCAAGTCAGAGGTC  
GTGGAAGGGCAAAAGACAGCAAGTGCATCCTTGTGACAAGCAAAATAGAAGTGGTTGAGA  
ATGAGAAACACAATCGTCACAAGGAAGAAATGATGAATGAAGCTATTGAAAAGCTACAGAG  
TTGGGATGAAACAACATTTGCAAGAAAGATACATGACCTGCAAATGAAGGAAAAGGTATTA  
CGAGATTCCAGGAAGAAAGAAACAAGAAGTAAGGTAGTGGAAGGGAAAAAAATCTTCTGT  
GTGGAAAATGCAAAGCATATGCCTGCAGTACAGATGACATCAGAGTTATAAAGGAATCTCA  
TCACACTGTCCTAGGATATGCGTTCAAGGAGCGTTATATAACAAAGCCTCACCAGAAACCA  
GTCCAGTTTGATTGTTTTGAGAAAAAAGCAAGATGTATTGCCAAAATACTAATTGCCAGCA  
TGA CTGGGGAATCGTAGTGAAGTACAAGACATTTGATAATCTACCA GTGATCAAAATCAAAA  
GCTTTGTATTAGAGAATGTTGAAACTGGGACACAAATGGATTTTCAGAAATGGAAGAATATT  
AATTTTCTTTAAAGAATTTTGATGTTGAAGAAACATCCAGCTGA

>agapornis\_roseicollis-rig1

ATGACGGCGGAGGAAAAGAGGAACCTGCAATGCTACAGGCGGTACATCGAGAAGAGCCT  
GAACCCCGTCTACATCCTGGGCAACATGACTGCCTGGCTGTCGGACGAGGAGAAGGAGC  
GAGTCCGTAAGGAGGAGGAGAAGGGGGTGACGGCGGCCGCCGCGCTGTTCTGGATAC  
CATCCTGTTGCTGGAGGCAGAGGGCTGGCTCCGGGGTTTCTGGATGCCCTGGTTGCAG  
CAGGTTACACTGGGCTGGCAGAAGCAATTGAAAATTGGGACTTCAGCAAGCTGGAAAACT  
GGAGTTGCACAGACAGCTGTTGAAGCGGATAGAAGCAACTATGCTAGAAGTTGATCCAGTA  
CCACTCATGCCTTACATAAACAAATGCCTGATAGAAAGGGAGTGTGAGGAGATCCTGCAGA  
TTAGCGAAAACAGAAGCAAAGCAGCGGGGATAACTAACTCATTGAATGTCTCTGTTCGATC  
AGATAAGGAAAACCTGGCCAAAAGCCTTCAGCTGGCACTGGATAACACAGGATATTACAAT  
GCAAGTGAAGTGTGGGATATGAGAGAAGATAATGGCAAAGACGTTGATGGTGAAATGACA  
GATGACTTTAAGAACAGCTTTGAAACCACAATGATGTTTTCTGAAGAGGCAGACTATGATAA  
TAATCTTAGTGAAAATCTCTGTTTCAGGTTTCAAGAGGTCTGTCAGTCTTCACCTGTTTATG  
AACCAAAGAAGGCTCGAAGCTACCAGACTGAACTTGCACAGCCTGCTATCAATGGGTATAA  
CACATTGATATGTGCCCCCACAGGATCTGGAAAACTTTTGTGGCAATAATGATTTGTGAAC  
ACCATTTCCAAAACATGCCCTCGGAACGAAAGGCCAAAAGTTGTCTTTCTTGCAACCAAAC  
GCCAGTGTATGAACAACAGAAAAATGTATTCAAGCAGCACTTTGAAAGAAGTGGATATTCT  
GTTCAAGGAATTAGTGGTGAAACAGTTGCAAATGTCTGTGTAGAAAGGGTTATACACGACA  
GTGACATCATTGTGCTAACACCCCAAGATTCTTGTGAATAGCATCGAGGAAGGGATCCTTAG  
CTCGCTCTCTATCTTCACTCTGATGATATTTGATGAGTGCCACAACACTATTGGCAACCACC  
CTTACAATGTGCTAATGAACAGATACCTGGAACAAAAATTTGACTCCTCAAGCCAACCTACCT  
CAGATTGTAGGTTTAACTGCTTCTGTTGGAGTTGGTAATGCCAAGACCATCAAGGAAACAA  
TAGAGTATGTCTGTACTGTCTGCGCCAACCTTGATGTACAGGCCATATCTACTGTCAGAGA  
GAACAAACAGGATCTGCAGAGATTTGGAACAGGCCAGAAATACATGTCAGATGGGTGAAA  
CCGAGAGCTCAAATCACTTTGCAGGGATTATCTCAGGCCTGATGTCTGAGACAGAGGCAT  
TGATGAGAAATAATTACTCAGTGGATACTATCTCCAGATCAACAAGACTGATTTTGGAAACA  
CAGAAATATGAACAGTGGATCGTTGCCACTCAGAAGAAATGCAGACTACTGCAACTGGCAG  
ATAAGGAGAAGGAGAGCAGCATTGTAGAGACCTTTTCATTTGCACTGAACACCTGCGGAA  
ATTCAATGATGCTCTCATCATCAGTGAAGATGCCCGCATTGAAGATGCTTTAGTCTACCTAA  
CTGATTTTTTTCAGAAATGTCAGAAATGGACCATATACAAAGCTAGAGAAGTATCTTACCGCC  
AAATTTCAAGAGAAAGAACCAAAACCTCTCTGCCCTTTCAAAAGATGAATCAAACGAGAATCC

CAAACCTGGAAGAGCTTGCTTGCATCCTGGATGAAGCATATCACTATAACCCACAGACTCGC  
ACTATTCTCTTTGCTAAGACAAGAGCCTTAGTAGCTGCTTTGAAGAAGTGGATAGAAGCAAA  
CCCTCTATTAAGCCACATAAAGCCAGGTATATTGATGGGTCATGGAAGAAGAGATCAAAAA  
ACAGGTATGACCCTCCCAATGCAGAAGGGTGTACTGGATGCATTCAAAACCAACAAAGACA  
CCAGACTACTAATTGCTACTTCTGTTGCTGATGAAGGCATTGATATTTCTGAGTGTAACCTT  
GTTGTGCTTTATGAATACTTTGGTAATGTCACCAAAATGATCCAAGTCAGAGGTCGTGGAA  
GGGCTAAAGACAGCAAGTGCATCCTGGTGACAAACAAAACAGAAGTGGTTGAGAAAGAAA  
AACACAACCGTTACAAGGAAGAAATGATGAATGAAGCTGTTGAAATGCTGCAGAATTGCGA  
TCAAAGAACATTTGCAAGAAAGATATATGCTTTGCAAATGAAGGAAAAGGTATTACGGGATT  
CCAGGAAGAAGGATCCACGAGACAAGGTAGATGAAGGAAAGAAAAATCTTCTGTGTGGAA  
AATGCAAAGCATTTGCCTGCAGTACAGATGACATCAGAATTATAAAGGAATCTCATCACACT  
GTCCTAGGAGACGCATTCAAGAAGCGGTATATAACAAAGCCTCACCTAAACCAGTCCAGT  
TCGATTATTTTGAGAAAAAAAGCAAGATGCATTGCCAAAATGCTAACTGCCAGCATGACTG  
GGGAATCATAGTGAAGTACAAGACATTGATAATCTACCAGTGATCAAAATCAAAAGCTTTG  
TAGTAGAGAACATTGAAACTAAGACACAAATGGATTTTCAGAAATGGAGAGATATTAATTTT  
TCTCTGAAGAATTTTGATGCTGAAGAACTGTCCAGCTGA

>alauda\_arvensis-rig1

ATGACGGCGGAGGAGAGGGGGGAACCTGCGCTGCTACCGGCGGTACATCGAGAGGATCCT  
GAACCCCGTGACATCCTCGGCAACATGACGGGCTGGCTGTCCGACGAGGTGAAGGAGA  
GGGTCCGCAAGGAGGAGGAGAAGGGGGTGACGGCGGCCGCCGCGCTGTTCTTGACGC  
CGTGCTGCTGCTGGAGACGGAGGGCTGGCTCCGGGCCTTCCTGGATGCCCTGGTTGCAG  
CAGGTTACACTGGAAGTGGCAGAAGCAATTGAAACTGGGACTTCAGCAAAGTGGAAAACT  
GGAGCTGCACAGGCAGTTGTTAAAGCGGATAGAAGCAACAATGCTAGAAATTGATCCTGTA  
GCAATCATGCCATACATAAACACATGCCTGATAGAGAGGGAGTGTGATGAGATCCTGCAGA  
TCAGTGAGTACAGAAGCAAAGCGGCCGGGATCACTAACTCATTGAATGCCTCTGTCGCTC  
GGATAAGGAAAACTGGCCCAAAAGCCTTCAGCTGGCATTGGATAATGCAGGATATTACAAT  
GCAAGTGAAGTCTGGAATGTAAGAGAAGATAATGGGAAAGATGATGATGTCGAAATGACAG  
ATGCCTCTGATAATCGCTTTGAAACCATGATGACATTTTTTGAAGAAGCAGAATGTGATAAT  
CTCAGTSAAAATCTCTCTTCGGTTTTAGAAAAGTGTCTGTGAGTCTTCATCTGTTTATGAACC  
AAAGAAGGCTAGGAGCTACCAGATTGAGCTTGCACAGCCTGCTATTGATGGGAAAAACACA  
TTGATTTGTGCCCCACAGGATCTGGAAAACTTTTTGTGGCGCTTCTGATTTGTGAACATCA  
TTTGCAAAACATTCCTTCAGGAAGAAAGGCAAAAGTTGTCTTCCTTGCAACCAAAGTGCCA  
GTGTATGAGCAACAGAAAAATGTATTCAGGCAGCATTTTGAAAGAAGTGGATATTCTGTTCA  
AGGAATTTGTGGTGAAACGGTTGCAAATATCTCTGTAGAAAATGTTATACAAGACAGTGACA  
TCATTGTGCTAACGCCACAGATTCTTCTGAATAGCTTGAGAAAGGGAACCTTAGTTCCCT  
CTCCATCTTCACTCTGATGATATTTGATGAGTGCCACAACACTACAGGCAACCACCCTTACA  
ATGTGTTGATGGCCAGATACCTGGATCAAAACTTGACTCCTCTGCAACCAAGCTGCCTCA  
GATTGTAGGTTTAACTGCTTCTGTTGGGGTTGGTAATGCCAAGAGCACTAATGAAACAGTA  
GAGCACATCTGTACCCTCTGCTCCTACCTTGACATTCAGGCCATATCCACTGTCAGAGAGA  
ACAAAGAAGATCTGCAAAGGTTTGAAACAAGCCAGAAACACATATCAGATGGGTTAAAT  
GCGAGCTCAGAATCACTTTGCAGACATTATCTCAGTTCTGATGTCTGAGACAGAGATGTTG  
ATGAGGAAGACTTACTCAGTGGATAACATCTCCCAAATCAACAAGAATTACTTTGGAACACA  
GAGATATGAACACTGGATAGTTTCCACTCAGAAAGAAATGCAGACTGTTACAAGTGAAGAT  
AAGGAGAAGGAGAGCAGTATTTGTAGAGACATTTTCATTTGACTGAACATTTGCGGAAATT

AAACGACGCTCTCATTATCAGTGAAGATGCCCGCATCGAAGATGCTTTAGCCTACCTAAAT  
GAATTTTTTCACAAACGTAAAAAATGGACCATATACAAAATTAGAGAAGCAACTGACGGAGAA  
ATTTCAAGAGAAAGAACCAGAGCTGACTGCCCTCTCAAAGATGAGTCAAATGAGAATCCC  
AAGTTGGAAGAGCTCACTTGCATCCTGGATGAGGCGTACCGCTATAACCCAGAGACTCGC  
ACAATTCTCTTTGCCAAGACAAGAGCCTTAGTAACTGCTTTGAAGAAGTGGATAGAAGCAA  
ACCCTGTACTTAGCCACATAAAGACAGATGTGTTGATGGGTAGGGGAAGAAGAGACTGTAA  
AACAGGTATGACCCTGCCAATGCAGAAGGAYGTACTGCATGCATTCAGAAATGACAAAGAC  
ATCAGACTGCTAATTGCTACATCTGTTGCTGATGAAGGCATTGACATTACTGAGTGTAACCT  
TGTGGTGCTCTATGAATACTTYGGTAATGTCACCAAAATGATCCAAGTTAGAGGTCGTGGA  
AGGGCAAAGGCAGCAAGTGCATCCTTGTGACAAGCAAAACAGAAGTGGTTGAGAATGAA  
AAGCTAAACAATTACAAGGAAGAAATGATGAATGCAGCTATCGAAAAGCTACAGAACTGGG  
ATGAAACAACATTTGCAAGAACGATACGTGGGCTGCAAATTAAGGAAAAAATGCTACGAGA  
TTCCAGGAAGAAAACCAACATAAAGTAGTGGAAGGGAAAAAATCTTTTGTGTGGAAAT  
GCAAAGCGTATGCCTGCAGTACAGATGACATCAGAATTATAAAGGAATCTCATCACACTGT  
CGTRGGTGACGCATTCAAGGAGCGTTACATAACAAAGTCCCACGAGAAACCACGTATGTTT  
GATGGTTTTGAGAAAAAATGCAAGATGCATTGCCGAAATACTGAGTGCCAGCATGACTGGG  
GGATCACAGTGAAGTACAAGACATTTGATAATTTACCAGTGATCAAAATCAGAAGCTTTGTA  
CTAGAGAATGTTGAAACTGGGACACAAATGGATTTTCAGAAATGGAAAAATCTTAATTTGTC  
TTTGAAGAATTTTGATGAGGAAACATCCAGCTGA

>alca\_torda-rig1

ATGACCGCGGAGGAGAAGAGGAGCCTGCAGTGCTACCGGCGGTACATCGAGAAGATCCT  
GAACCCCGTCTACATCCTGAGCAACATGACGGAATGGCTGTCTGACGAGGTGAAGGAGAG  
AGTGCGGAAGGAAGAGGAGAAGGGGGTGACGGCGGCCGCGCTGTTTCTGGATGCC  
ATCCTGCAGCTGGAAGTGGAGGGATGGCTCCGGGGCTTCATCGACGCCCTGGCTGCAGC  
AGGTTACACCGGACTGGCAGAAGCAATTGAAAAGTGGGACTTCAGCAAACTGGAAAAGCT  
GGAGCTGCACAGACAGCTGTTGAAGCGGATAGAAGCAACGATGCTAGAAATTGATCCGGT  
AGCGCTCATGCCCTACATAAACACGTGCCTGATAGAAAGGGAGTGTGATGAGATCCTGCA  
GATTTGTGAATACAGAAGCAAAACAGCTGGTATAACTAACTTATTGAATGTCTCTGTGCGAT  
CGGATAAGGAAAAGTGGCCGAAAAGCCTTCAACTGGCACTAGATAACACAGGATATTACAA  
TGCAAGCGAACTATGGGATATGAGAGAAGATAACGGCAAAGATGTTGATGGTGAAATCACA  
GATGCCTCTGAAAACACCTTTGAAACACGGTGACATTCTTTGAAGAAGCAGAATGTGATA  
ATAATCTCAGTGAAAATCTCTGTTTCACTTTAGAAGGGATTGATCAGCCTTCACCTGTTTAT  
GAACCAAAGAAGGCTCGGAGCTATCAGGTTGAACTTGCGCAGCCTGCTATCAATGGGAAA  
AACACAGTGATATGTGCCCCACAGGCTCTGGAAAACTTATGTGGCACTTATGATTTGTG  
AACACCATTTCCAAAATATGCCTGCAGGACGAAAGGCGAAAGTTGTCTTTCTTGCAACTAAA  
GTGCCAGTGATCGAACAACAGAAAAATGTATTCAAACAGCATTTTGAAAGAAGTGGATATTC  
TGTTCAAGGAATTAGTGGTGAAACAGTTGCAAATGTCTCTGTAGAAAAGATTATACAGGACA  
GTGACATCATTGTGCTGACGCCCCAGATTCTTGTGAATAGCATTGAGGAAGGGATCCTTAG  
CTCCCTCTCCATCTTCACTCTGATGATATTTGATGAGTGCCACAACACTACGGGCAACCAC  
CCTTACAATGTGTTAATGACCAGATACCTGGATCAAAAATTTGGCTCCTCTGCAACCAGCT  
GCCTCAGATTGTAGGTTTAACTGCTTCTGTTGGAGTTGGTAATGCCAAGAGCGTCAAGGAA  
ACGATCGAGCACATCTGTACCCTCTGCTCCTACCTTGACATACAGGCCATATCCACTGTCA  
GAGAGAACAAGAGGATCTGCAGAGATTGAGAAATACTCCAGAAACATATGTCAGATGGGT  
TAAAATGCGAGTTCAGAATCACTTTGTAGACATTATCTCAGGTCTGATGTCTGAGACAGAAA



TGATGATGAAGAAGATTTACTCCGTGGATACTGTCTCCCAAATCAACAAGAATGATTTTGGAA  
ACACAGAAATATGAACACTGGATAGTTGCGACTCAGAAGAAATGCAAACCTGTTGCAACTGG  
CAGACAAGGAGAAGGAGAGCAGCGTTTGTAGAGACCTTTTCATTTGCACTGAACACCTGC  
GGAAATACAACGATGCTCTCATCATCAGTGAAGATGCCCCGCATCGAAGATGCTTTAGCCTA  
CCTCACTGAATTTTTACAAATGTCAAAAACGGACCCTATACAGAGTTAGAGAAGCAACTGA  
CAGCCAAATTTCAAGAGAAAGAACCAGAACTGACTGCCCTTTCAAAGATGAATCAAATGA  
GAATCCCAAGCTGGAAGAGCTTGCTTGCATCCTGGATGAAGAATACCACTACAACCCACAG  
ACTCGCGCTCTTCTCTTTGCTAAGACAAGAGCCTTAGTAGCTGCTTTGAAGAAGTGGATAG  
AAGCAAACCTCTACTTAGCTACATAAAACCAGATGTGTTGATGGGTCGTGGAAGAAGAGA  
TCAAAAACAAGTATGACCCTCCCAATGCAGAAGGGGATACTGGATGCATTCAAACCAAC  
AAAGACAGCAGACTGCTAATTGCTACGTCAGTTGCTGACGAAGGCATTGATATTTCTGAAT  
GCAACCTTGTTGTGCTCTATGAATACTTCGGTAATGTCACCAAAATGATCCAAGTCAGAGGT  
CGTGGAAGGGCAAGAGACAGCAAGTGCATCCTTGTAACAAGCAAAACAGAAGTGGTTGAG  
AATGAGAAACACAACCGTTACAAGGAAGAAATGATGAATGAAGCTATTGAGAATCTACAGA  
ATTGGGATGAAAGAACATTTGCCAGAAAGATACATGACCTGCAAATGAAGGAAAAGGTATT  
ACGAGATTCCAGGAAGAAAGAAGCAAGACCTAAGGTAGTGGAAGGGAAAAAAATCTTCTG  
TGTGGAATAATGCAAAGCATATGCCTGCAGTACAGATGACATCAGAATTATAAAGGAATCTC  
ATCACACTGTCCTAGGAGACGCATTCAAGGAGCGCTACATAACAAAGCCTCACCGTAAAGC  
AATCCAGTTTGATTGTTTTGAGAAAAAAGCAAGATGCATTGCCAAAATACTAGTTGCCAGC  
ATGACTGGGGAATCACAGTGAAGTACAAGACATTTGATAATCTACCAGTGATCAAAATTAA  
AGCTTCGTAGTAGAGGACGCTGAAACTGGGACACTAATGGATTTTCAGAAATGGAAAAATA  
TTAATTTTTTCATTGAAGAATTTTGATGAGGAAGTGTCCAGCTGA

>alectura\_lathami-rig1

ATGACTGCCGAGGAGAAGCAGAGCCTGCGCTGCTACCGGCGGTACATCGAGAGGAGCCT  
GAACCCCGTCTACGTGCTGGGCAACATGGTGGACTGGCTGTCCGACGAGCTGCGGGAGA  
GGATCCGGAAGGAGGAGGAGAAGGGGGTGAGCGGGGCCCGCGATGTTCTGTGGACGC  
CGTGCTGACGCTGGAGGCCGAGGGCTGGTTCCGCGGGATGCTGGACGCGATGGTGGCC  
GCAGGTTACACAGGTCTGGCGGAAGCGATTGAGAACTGGGACTTCAGCAAACCTGGAAAA  
CTGGAGATACACAGGCAGCTGTTGAAGCGGATAGAAGCATCCATGTTAGAGGTGACCCCA  
GTAGCGCTCATGCCTTACATAAACAGCTGCCTGATAGACAGGGAGTGCGAAGAGATTGAG  
CAAATTAGTGAAAACAGAAGCAAAGCAGCAGGCATAACGAGACTCATTGAATGTCTCTGCC  
GGTCGGATAAGGAACACTGGCCAAAAAGCCTTCAGCTGGCCCTAGACAACACAGGATACT  
ACTATGCAAGTGAAGTGTGGGATATGAGAGACGATAATGACAAAGATGTTGACAGTGAAGT  
GACAGACACCTCTGAGGACAGCCCTAAAATGACGTAATCTGAAGAAGCAGAATATGATGGT  
AACCTCAGTGAGAATCTCGGTGCAGCTCCAGAGCGGATGGTTGAGTCTCCACCTGTTTATG  
AACCAAAGAAGGCTTGAGAGCTACCAGATTGAACTTGACAGCCTGCTATCAATGGGAAAA  
TACCTTAATATGTGCTCCTACTGGGTCTGGAAAAACCTTCGTGGCGCTTATGATTTGTGAAC  
ACCATTTCCAAACATGCCCCCGGGACGAAAGGGGAAGGTGGTCTTTCTTGCAACTAAAGT  
CCCAGTGTATGAGCAACAGAGAGACGTCTTCAAGCAGTATTTTGAAAGGCAGGGATACTCT  
GTTCAAGGAATTAGTGGTGAAACAGTTGCAAATATCTCTGTAGACATGGTTATACAGGACA  
GCGACATCATCGTAATGACTCCCCAGATCCTGGTGAACAGTTTTTGGGAACGGGACCCTTAC  
CTCCCTCTCCATTTTCACTCTGATGATTTTTGATGAGTGCCACAACACTACAGGCAACCATC  
CTTACAGTATGTTGATGGCCAGATACCTGGAGCAGAAATTTGACTCCCTTCAAGTCAGCT  
GCCGCAGATTCTAGGTTTGACTGCTTCTGTTGGAGTTGGTGGTGCCAAGAACATCGAGGA

AACAGTGGAGCACATCTGTACTCTCTGTTCCCTACCTTGACATACAGGTTGTATCCACTGTCA  
GAGAGAACATAGAGGATCTACAGAGATTTCGTGAACAAGCCAGAAACAAATGTCAGACTGGT  
CAAGACACGACTCCACAATCACTTTGCAGTCATCATCGCAGGTTTGATGTCTGAGACAGAG  
GCATTGATGAGGAAGATTTATTCAAGTGGATACCATCCCCCAAATAACACAAACGATTTTGG  
AACACAGAAGTATGAACACTGGATAGTTGTCACTCAGAGGAAATGCAGACTTTTGCAACTG  
AAGGACAAGGAGGAGGAAAGCAGGATGTGTAGAGCCCTTTTCATTTGCACTGAACACCTG  
CGGAAATTCAACGATGCCCTCATCATCAGTGAAGACGCACGCATCCAAGATGCTTTATCTT  
ACCTCACAGAGTTTTTTCACAAATGTCAGAAATGGACCATACACAGAATTGGAGCGGCACCT  
GACAGCCAAATTTCAAGAGAAAGAACCAGAGCTGACTGCCCTTTCAAAAGATGAATCGAAT  
GAGAATCCCAAACCTGGAGGAGCTTGCTTGCATCCTGGATGATGCATACCGCTATAACCCAC  
AGACTCGTACTCTTCTCTTTGCTAAGACCAGAGCCTTAGTAGCTGCTTTGAAGAAGTGGAT  
GGAGGAAAACCCGCTGCTTAGCTACATAAAGCCAGAAATTTTGATGGGGCGTGCGAGAAG  
AGATCAGAGGACAGGTATGACCCTCCCAAGCCAGAAAGGCATACTGGATGCATTCAAAAC  
CAACAAGGACAGCAGACTGCTCATTGCTACATCTGTTGCTGACGAAGGCATTGATATTGCC  
CAGTGCAACCTTGTCGTGCTCTATGAATACTTCGGTAACGTCACCAAATGATCCAAGTCA  
GAGGTCGTGGAAGGGCAACAAACAGCAAGTGCATCCTTGTAACAAACAAACCAGAAGTGG  
TTGAGAATGAGAAACACAACCGCTACAAGGAAGAAATGATGAACAAAGCTATTGAAGAGCT  
CCAGAAGTGGGACGAAGCAACGTTTGCAAGAAAGGTACACAGCCTGCAAATGAAGGAGAA  
GGTGTACGAGATTCCAGGAAGAAAGAAATAAGACCTAAGGTAAAGGAAGACAAAATGAAC  
CTCCTGTGTGGAAGTGCAAAGCATATGCCTGCAGTACAGATGACATCAGAGTTATACAGG  
AATCTCATCACACTGTCCTGGGAGAAGCATTCAAGGAGCGTTACATAACAAAGCCTCACAA  
GAAACCATTCGAGTTTGATGGTTTTGAGAAAAAATGCAAGATGTATTGCCAAAATAGCAATT  
GCCAGCATGACTGGGGAATCACGGTGAAGTACATGACATTTGACAACCTGCCAGTGATCA  
AAATCAAAAGCTTTGTGATGGAGAATGCTGCAACGGGGACACAGATGGACTTTTCAGAAGTG  
GAAAAGTATCAATTCTTCTTTGAAAAGATTTGATGTTGAAGAAATGTCTGGCTGA

>amazona\_aestiva-rig1

ATGACGGCGGAGGAGAAGAGGAACCTGCAATGCTACAGGCGGTACATCGAGAAGAGCCT  
GAACCCCGTCTACATCCTGGGCAACATGACGGCCTGGCTGTCGGACGAGCAGAAGGAGC  
GAGTCCGTAAGGAGGAGGAGAAGGGNGTGACGGCGGCGCGCGCTGTTCTGGATACC  
ATCTTGCTGCTGGAGGCAGAGGGCTGGCTCCGGGGCTTCCTGGATGCCCTGATTGCAGC  
AGGTTACACTGGGCTGGCAGACGCAGTTGAAAATTGGGACTTCAGTAAGCTGGAAAACT  
GGAGTTGCACAGACAGTTGTTGAAGAGGATAGAAGCAACCATGCTAGAAGTTGATCCGGTT  
GCACTCATGCCTTACATAAACACGTGCCTGATAGAAAGGGAGTGTGATGAGATCCTGCAGA  
TTAGCGAATACAGAAGCAAAGCAGCTGGGATAACTAACTCATTGAATGTCTCTGTGCATC  
AGATAAGGAGAACTGGCCAAAAAGCCTTCAGCTGGCACTGGATAACACAGGATATTACAAT  
GCAAGTGAACGTGTTGGATATGAGAGAAGATAACTGCAAAGACATTGATGGTGAAATGACAG  
ATGCCTTTAAGAACAGCTTTGAAACCACAATGACGTTTTCTGAAGAGGCAGAATGTGATAAT  
AATCTCAGTGAAAATCTCTGCTCAGGTTTACAAGAGGTCTATCAGTCTTCACCTGTTTATGA  
ACCAAANAAGGCTCGGAGCTACCAGACTGAACTTGCGCAGCCTGCTATCAATGGGTATAA  
CACATTGATATGTGCCCCCACAGGATCTGGAAAACTTTTGTGGCACTGATGATTTGTGAA  
CACCATTTCCAAAACATGCCCTCAGGACAAAAGGCCAAAAGTTGTCTTTCTTGCACTCAAAT  
GCCAGTGTATGAACAACAGAAAAATGTATTCAAGCAGCACTTTGAAAGAAGTGGATATTCT  
GTTCAAGGAATTAGCGGTGAAACAGTTGCAAATGTCTCTGTAGAAAAGGTTATACAGGACA  
GTGACATCATTGTGCTAACACCCAGATTCTTGTGAATAGCATCGAAGAAGGGATCCTTAG

CTCCCTCTCCATCTTCAGTCTGATGATATTTGATGAGTGCCACAACACTATGGGCAACCAC  
CCCTACAATGTGTTAATGACCAGATACCTGGAACAAAAATTTGACTCCTCTGCAAGCCAACT  
ACCTCAGATTGTAGGTTTAACTGCTTCTGTTGGAGTTGGTAATGCCAAGACCACCNAGGAA  
ACGATAGAGTACGTCTGTACTGTCTGCGCCAACCTTGACATACAGGCCATATCTACTGTCA  
GAGAGAACAAACAGGATCTGCAGAGATTTGGAAACAAACCAGAAATACATGTCAGATNTGT  
GAAAATGAGAGCTCAGAATCACTTTGCAGAGATAATTTCAAGGCCTGATGTCTGAGACAGAG  
GCATTGATGAGAAAGAATTACTCAGTGGATACTGTCTCCAGATCAATAGAAATGATTTTGG  
AACACAGAAATATGAACACTGGGTAGTTGCCACTCAGAAGAAATGTAGACTATTGCAACTG  
GAAGATAAGGAGAAGGAGAGCAGCATTTCAGAAACCTCTTCATTTGCACTGAGCACCTGC  
GGAAATTCAATGATGCTCTCATCATCAGTGAAGATGCCCGCATTGAAGATGCTTTAGCCTAT  
CTAACTGATTTTTTCAGAAATGTCAGAAATGGACCATATACAGAGTTAGAGAAGCAACTTAC  
AGCCAAATTTCAAGAGAAAGAACCAAACTGTTTGCCCTTTCAAAGATGAATCAAATGAGA  
ATCCCAAGCTGGAAGAGCTTGCTTGCATCCTGGATGAAGCATACCGCTATAACCCACAGAC  
TCGCACTATTCTGTTTGCAAAGACAAGAGCCTTAGTAGCTGCTTTGAAGAAGTGGATAGAA  
GCAAACCCCTCTATTTAGCCACATAAAGCCAGGTATATTGATGGGTCATGGAAGAAGAGATC  
AAAAACAGGTATGACCCTCCCAATGCAGAAGGGTGTACTGGATGCATTCAAACCAACAA  
AGACACCAGACTGCTAATTGCTACTTCTGTTGCTGATGAAGGCATTGATATTTCTGAGTGCA  
ACCTTGTTGTGCTCTATGAATACTTTGGTAATGTCACCAAAATGATTCAAGTCAGAGGTCGT  
GGAAGGGCTAAAGACAGCAAGTGCATCCTCCTGACAAACAAAACAGAAGTGGTTGAGAAA  
GAGAAACAGAACCGTTACAAGGAAGAAATGATGAATGAAGCTGTTGAAAAGCTACAGAATT  
GGGATAAAAGAACATTTGGAGGAAAGATACATGATTTGCAAATGAAGGAAAAGGTATTACG  
AGATTCCAGGAAGAAAGAAACGCGATACAAGGTAGTGGAAGGAAAGAAAAATCTTCTGTGT  
GGAAAGTGCAAAGCATTGCGCTGCAGTACAGACGACATCAGAATCATAAAGGAATCTCATC  
ACACTGTCATAGGAGATGCATTCAAGGAGCGGTATATAACAAAGCCTCACCATAAACCAGG  
CCAGTTTGAAGGTTTTGAGAAAAAAGCAAGATGCATTGTCAAATACTAACTGCCAGCATG  
ACTGGGGAATTATAGTGAAGTACAGGACATTTGATAATCTGCCAGTGATCAAATCAAAG  
CTTTGTAGTAGAAAACATTGCAACTGGGACACAAATGGATTTTCAGAAATGGAAGATATTA  
ATTTTCTCTGAAGAATTTGATGCTGAAGAAGTGTCCAGCTGA

>anas\_platyrrhynchus-rig1

ATGACGGCGGACGAGAAGCGGAGCCTGCAGTGCTACCGCCGCTACATCGAGCGGAGCCT  
CAACCCGGTCTACGTGCTGGGCAACATGACGGACTGGCTGCCCGACGAGCTGCGGGAGA  
GGATCCGCAAGGAGGAGGAGAGGGGGGTGAGCGGCGCCGCCGCGCTCTTCCTGGACGC  
CGTGCTGCAGCTGGAGGCCCGGGGGTGGTTCCGAGGGATGCTGGACGCGATGCTGGCC  
GCAGGTTACACAGGACTGGCAGAAGCAATTGAGAAGTGGGACTTCAGCAAAGTGGAAAAA  
CTGGAGTTACACAGACAGCTGTTGAAGCGGATAGAGGCAACAATGTTAGAAGTCGACCCA  
GTAGCGCTCATTCCCTATATAAGCACATGCCTGATAGACAGGGAGTGTGAAGAGATTGAGC  
AGATTAGTGAAAACAGAAGCAAAGCAGCAGGCATAACTAACTCATTGAATGTCTCTGTCTG  
GTCGGATAAGGAGCACTGGCCAAAAAGCCTTCAGCTGGCACTAGATACCACAGGATATTA  
CCGTGCAAGTGAAGTGTGGGATATAAGAGAAGATAATGCCAAAGATGTTGACAGTGAAATG  
ACAGATGCCTCTGAGGACTGCCTTGAAGCCAGTATGACATATTCTGAAGAAGCAGAACCTG  
ATGATAATCTCAGTGAAAATCTTGGTTGAGCTGCAGAAGGAATTGGCAAACCTCCACCTGT  
CTATGAAACAAAGAAGGCTCGGAGCTACCAGATTGAACTTGACAGCCTGCTATCAATGGG  
AAAAATGCCTTAATATGTGCCCTACTGGATCTGAAAAAAGTTCGTCTCAATTCTGATTTG  
CGAACACCATTTCAAAACATGCCTGCAGGACGAAAGGCGAAAGTTGTCTTTCTTGCAACT

AAAGTCCCAGTGTATGAACAGCAGAAAAATGTCTTCAAGCATCATTTTGAAGACAAGGATA  
CTCTGTTCAAGGAATTAGTGGTGAAAATTTTCAAATGTCTCTGTAGAAAAAGTTATAGAGG  
ATAGTGACATCATCGTAGTGACACCCAGATCCTGGTGAATAGCTTCGAGGATGGGACCCT  
TACCTCGCTCTCCATTTTCACTCTGATGATATTCGATGAGTGCCACAACACTACAGGCAACC  
ACCCTTACAATGTGTTAATGACCAGGTATCTGGAGCAGAAATTTAACTCTGCAAGTCAGCT  
GCCACAGATTTTAGGTTTGACTGCTTCTGTTGGAGTTGGTAATGCCAAGAACATTGAGGAA  
ACAATAGAGCACATCTGTAGTCTCTGCTCCTACCTTGACATACAGGCCATATCCACTGTCA  
GAGAGAACATACAAGAACTGCAAAGGTTTCATGAACAAGCCAGAAATAGATGTCAGATTGGT  
TAAGAGGCGAATTCACAATCCCTTTGCAGCCATTATCTCAAATTTGATGTCCGAGACAGAG  
GCACTGATGAGGACAATTTACTCAGTGGATACTCTCTCCAAAACAGCAAGAAAGATTTTCG  
GAACACAGAACTATGAACACTGGATAGTTGTCACTCAGAGGAAATGCAGACTGCTGCAACT  
AGAAGACAAAGAGGAGGAGAGCAGGATATGTAGAGCCCTTTTCATTTGCACTGAACACCTG  
CGGAAATACAATGATGCCCTCATCATCAGTGAAGATGCCCGCATCATAGATGCTTTATCCT  
ACCTGACCGAGTTTTTTCACAAATGTCAAGAATGGACCATACACAGAATTAGAGCAGCACCT  
GACGGCCAAATTTCAAGAGAAAGAACCAGAACTGATTGCCCTTTCAAAAGACGAAACAAAT  
GAGAATCCTAACTGGAAGAGCTTGTCTGCATCCTGGATGATGCGTACCGCTATAACCCAC  
AGACTCGCACTCTTCTCTTTGCTAAGACAAGAGCTTTAGTATCCGCTTTGAAGAAGTGTATG  
GAGGAAAACCCTATTCTTAACCTACATAAAGCCAGGTGTTTTGATGGGGCGCGGAAGAAGAG  
ATCAAACAACAGGTATGACCCTCCCAAGCCAGAAGGGTGTGCTGGATGCGTTCAAACCA  
GCAAGGACAACAGGCTGCTCATTGCTACATCTGTTGCTGATGAAGGCATTGATATTGTCCA  
GTGCAACCTTGTTGTGCTCTATGAATACTCCGGTAACGTGACCAAAATGATCCAAGTCAGA  
GGTCGTGGAAGGGCAGCAGGCAGCAAGTGCATCCTTGTGACAAGCAAAACAGAAAGTGGTT  
GAGAATGAAAAATGCAACCGTTATAAGGAAGAAATGATGAATAAAGCTGTTGAAAAGATCC  
AGAAATGGGATGAAGAAACATTTGCAAAAAAGATACATAATCTGCAAATGAAGGAAAGGGT  
GTTACGAGATTCCAGGAGGAAAGAAATAAAACCTAAAGTAGTGGAAGGCCAAAAGAACCTC  
CTGTGTGGAATGCAAAGCATATGCCTGCAGTACAGATGACATCAGGATTATAAAGGACT  
CCCATCACATTGTCCTAGGAGAAGCATTCAAGGAGCGTTATACAACAAAGCCTCATAAGAA  
ACCAATGCAGTTTGATGGTTTTGAGAAAAAAGCAAGATGTATTGCCGAAATAATAATTGCC  
AGCATGATTGGGGAATCACAGTGAAGTACCTGACATTTGACAATCTACCAGTGATCAAAAT  
CAAAAGCTTCGTAATGGAGAGTACTGCAACTGGAACACAAATGGACTTTCAGAAATGGAAA  
AGCATTAATTCTTCTTTGAAGAATTTTGATGTTGAAGAAATGTCCAACCTTGTAACCCACCATTT  
TAG

>anser\_cygnoides-rig1

ATGACGGCGGACGAGAAGCGGAGCCTGCAGTGCTACCGGCGGTACATCGAGCGGAGCCT  
CAACCCCGTCTACGTGCTGGGCAACATGGCGGACTGGCTGCCCGACGAGCTGCGGGAGA  
GGATCCGCAAGGAGGAGGAGAGGGGGGTGAGCGGCGCCGCGCGCTCTTTCTGGACGC  
CGTCCTGCAGCTGGAGGCCCGCGGCTGGTTCCGAGGGATGCTGGACGCAATGCTGGCCG  
CAGGTTACACAGGACTGGCAGAAGCAATTGAGAACTGGGACTTCAGCAAACTGGA AAAAC  
TGGAGTTACACAGACAGCTGTTGAAGCGGATAGAGGCAACAATGTTAGAAGTCGACCCAG  
TAGTGCTCATTCCCTACATAAACACCTGCCTGATAGACAGGGAGTGCGAAGAGATTGAGCA  
GATTAGTGAAAGCAGAAGCAAAGCAGCAGGCATAACTAACTCATTGAATGTCTCTGTCCG  
TCGGATAAGGAGCACTGGCCAAAAGCCTTCAGCTGGCACTAGATAACACAGGATATTACC  
GTGCAAGTGAAGTGTGGGATATGAGAGAAGATAATGCCAAAGATGTTGACAGTGAAATGAC  
AGATGCCTCTGAGGACTGCCTTGAAACAAGTATGACATATTCTGAAGAAGCAGAACCTGAT

GATAATCTCAGTGAAAATCTTGGTTCAGCTGCAGAAGGAATTGACAAGCCTCCACCTGTCT  
ATGAAGCAAAGAAGGCTCGGAGCTACCAGATTGAACTTGCACAGCCTGCTATCAATGGGA  
AAAATGCCTTAATATGTGCCCTACTGGATCTGGAAAACTTTCTGTCGCGCTTCTGGTTTGT  
GAACACCATTTCCAAAACATGCCTGCAGGACGAAAGGGGAAAAGTTGTATTTCTTGCAACAA  
AAGTCCCAGTGTATGAACAACAGAAAAATGTCTTCAAGCAACATTTTGAAAGACAAGGATAT  
TCCATTCAAGGAGTTAGTGGTGAATAATTTTCAAATGTCTCTGTAGAAAATGTTATAGAGGA  
CAATGACATCATCGTACTGACACCCCAGATCCTGGTGAATAGCTTCGAGGATGGGACCCTT  
ACCTCCCTCTCTGTTTTCACTCTGATGATATTCGATGAGTGCCACAACACTACAGGCAACCA  
CCCTTACAATGTGTTAATGACCAGGTATCTGGAGCAGAAAATTTAACTCCCTGCAAGTCAG  
CTGCCACAGATTTTAGGTTTGACTGCTTCTGTTGGAGTTGGTAATGCCAAGAACATTGAGG  
AAACAATAGAGCACATCTGTAGTCTCTGCTCCTACCTTGACATACAGGCCATATCCACTGTC  
AGAGAGAACATACAAGACCTGCAAAGGTTTCATGAACAAGCCAGAAAATAGATGTCAGATTGG  
TTAAGAGGCGAGTTCACAATCACTTTGCAGTCATTATCTCAGATTTGATGTCCGAGACAGA  
GGCACTGATGAGGAAGATTTACTCAGTGGGTACTGTCTCCCAAAACAGCAGGAAAAGATTTT  
GGAACACAGAAATATGAACACTGGATAGTTGTCACTCAGAGGAAATGCAGACTGTTGCAAC  
TAGAAGACAAGGAGGAGGAGAGCAGGATATGTAGAGCCCTTTTCATTTGCACTGAACACCT  
GCGGAAATACAATGATGCCCTCATCATCAGTGAAGATGCCCGCATCATAGATGCTCTATCC  
TACCTGACCGAGTTTTTCACAAATGTCAAGAATGGACCATACACAGAATTAGAACAGCACCT  
GACAGCCAAATTTCAAGAGAAAGAACCAGAACTGACTGCCCTTTCAAAAGACGAAACAAAT  
GAGAATCCTAACTGGAAGAGCTTGCCTGCATCCTGGATGATGCATACCGCTATAACCCAC  
AGACTCGCACTCTTCTCTTTGCTAAGACAAGAGCCTTAGTAGCTGCTTTGAAGAAGTGTAT  
GGAGGAAAACCCTATCCTTAGCTACATAAAGCCAGATGTTTTGATGGGGCGCGGAAGAAG  
AGATCAAAAAACAGGTATGACCCTCCCAAGCCAGAAGGGTGTACTGGATGCGTTCAAAACC  
AGCAAGGACAGCAGGCTGCTCATAGCTACATCCGTTGCTGATGAAGGCATTGATATTGCC  
AGTGCAACCTTGTTGTGCTCTATGAATACTCCGGTAATGTGACCAAAATGATCCAAGTCAG  
AGGTCGTGGAAGGGCAGCAGGCAGCAAGTGCATCCTTGTGACAAGCAAAACAGAAGTGGT  
TGAGAATGAAAAATGCAACCGTTATAAGGAAGAAATGATGAATAAAGCTATTGAAAAGCTCC  
AGGAATGGGATGAAGAAACATTTGCAAAAAAGATACATAACCTGCAAATGAAGGAAAAGGT  
GTTACGAGATTCCAAGAAGAAAGAAATAAAACCTAAAGTAGTGGAAGGCCAAAAGAACCTC  
CTGTGTGGAATAATGCAAAGCATATGCCTGCAGTACAGATGACATCAGAATTATAAAGGAAT  
CTCATCACATTGTCCTAGGAGAAGCATTCAAGGAGCGTTATATAACAAAGCCTCATAAGAAA  
CCAATGCAGTTTGATGTTTTGAGAAAAAAAGCAAGATGCATTGCCGAAATAATAATTGCCA  
GCATGACTGGGGAATCACAGTGAAGTACCTGACATTTGACAATCTACCCGTGATCAAAATC  
AAAAGCTTCGTGGTGCAGAGTGCTGCAACCGGGACACAAATGGACTTTGAGAGATGGAAA  
AGTATTAATTCTTCTTTGAAGAATTTTATGTTGAAGAAATGTCCAACCTGTACCCACCATT  
TAG

>antigone\_vipio-rig1

ATGACGGCGGAGGAGAAGAAGAGCCTGCAGTGCTACAGGCGGTACATCGAGAAGAGCCT  
GAACCCCGTCTACATCCTAAGCAACATGACGGACTGGCTGTCCGACGAGGTGAAGGAGAG  
AGTCCGGAAGGAGGAGGAGAAGGGGGTGACGGCGGCCGCCGCGCTGTTTGTGGATACC  
ATCCTGGAGCTGGAGGCGGAGGGCTGGCTGCGGGGCTTCCTGAACGCCCTGGTTGCAGC  
AGGTTACACTGGACTGGCAGAAGCAATTGAAAAGTGGGACTTCAGCAAACTGGAAAACTG  
GAACTGTACAGACAGCTGTTGAAGCGGATTGAAGCAACAATGCTAGAAGTTGATCCAGTAG  
CACTCATGCCCTACATAAACACGTGCCTGATAGAAAGGGAGTGTGATGAGATCCTGCAGAT

TAGCGAATACAGAAGCAAAGCAGCCGGGATAACTAAGCTCATTGAATGTCTCTGTGCGATCG  
GATAAGGAAAACCTGGCCAAAAAGCCTTCAGCTGGCACTAAATAACACAGGATATTACAATG  
CAAGTGAACCTGTGGGATATGAGAGAAGGAAACGGCAAAGATGTTGATGGTGAAGTGACAG  
ATGCCTCTGAGAACAGCTTTGAAACCATGATAACATTTTCTGAAGAAGCAGAACCTGATAAT  
AATCTCAGTGAAAATCTCTATTTCAGCTTCAGAAGGAATCTATCAGCCTTCACCTGTTTATGA  
ACCAAAGAAGGCTCGGAGCTACCAGATTGAACTTGCGCAGCCTGCTATCGATGGGAAAAA  
CACATTGATATGTGCCCCCACAGGATCTGGAAAAACTTTTGTGGCAGTTATGATTTGTGAAC  
ATCATTTCCAAACATGCCCCACAGGACGAAAGGCAAAAGTTGTTTTCTTGCAACTAAAGTG  
CCAGTGTACCAACAACAGAAAAACGTATTCAAGCAGCATTTTGAAAGAAGTGATATTCTGT  
TCAAGGAATTAGTGGTGAACAGTTGCAAATGTCTCTGTAGAAAAGGTTATACAGAACAGT  
GACATTGTTGTGCTGACGCCCCAGATTCTTGTAATAGCATTGAGGAAGGGATCCTTAGCT  
CCCTCTCCATCTTCACTCTGATGATATTTGATGAGTGCCACAACACTACAGGCAACCACCC  
TTACAGTGTGTTAATGACCAGATACCTGCAACAAAAATTTGACTCCTCTGCAACCAGCTGC  
CTCAGATTGTAGGTTTAACTGCTTCTGTTGGAGTTGGTAATGCCAAGAGCATCAAGGAAAC  
AATAGAGCACATCTGCACCCTCTGCTCCTACCTTGACATACAGGCCATATCCACTGTCAGA  
GAGAACAAAGAGGATCTGCAGAGATTTGGAAACAAGCCAGAAATGTATGTCAGATGGGTTA  
AAATGCGAGTTCAGAATCACTTTGCAGACATTATCTCAGGTCTGATGTCTGAGACAGAGGA  
GTTGATGAGGAAGATTTACTCAGTGGATAATATCTCTCAAATCAACAAGAATGATTTTGGAA  
CACAGAAATATGAGCACTGGATAGTTGCCACTCAGAAAAAATGCAGACTGTTGCAACTGGC  
AGATAAAGAGAAGGAGAGCAGCATTGTAGAGACCTTTTCATTTGCACTGAACACCTGCGG  
AAATTCAACGATGCTCTCATCATCAGTGAGGATGCCCGCATCGAAGATGCTTTATTCTACCT  
AACTGAATTTTTCATAAATGTCAAAAACGGACCATATACGGAGTTAGAGAAGCAACTGACAG  
CCAAATTTCAAGAGAAAGAACCAGAACTGATTGCCCTTTCAAAGATGAATCAAATGAGAAT  
CCCAAGCTGGAAGAGCTTGCTGCATCCTGGATGAAGCATACCGCTATAACCCACAGACT  
CGCACTCTTCTCTTTGCTAAGACAAGAGCCTTAGTAGCTGCTCTCAAGAAGTGATAGAAG  
CAAACCCTCTACTTAACCACATAAAACCAGGTGTGTTGATGGGTCGTGGAAGAAGAGATCA  
AAAAACAGGTATGACCCTCCCGATGCAGAAGGGTGTACTGGATGCATTCAAACCAACAAA  
GACAGCAGACTGCTAATTGCTACATCTGTTGCTGATGAAGGCATTGATATTTCTGAGTGCA  
ACCTTGTTGTGCTCTATGAATACTTCGGTAATGTCACCAAAATGATCCAAGTGAGAGGTCGT  
GGAAGGGCAAGAGACAGCAAGTGCATCCTTGTGACAAACAAAAAAGAAGTGTTGACAAT  
GAGAAACAGAACCATTATAAGGAAGAAATGATGAATGAAGCTATTGAAGAGCTACAGAATT  
GGGATGAAACAACATTTGCAAGAAAGATACATGACCTGCAAATGAAGGAAAAGGTATTAAG  
AGATTCCAGGAAGAAAGACACAAGATGTAAGGCAGTGGAAGGAAAAAAAAAATCTTCTCTGT  
GGAAAATGCAAAGCATATGCCTGCAGTACAGATGACATCAGAGTTATAAAGGAATCTCATC  
ACACTGTCCTAGGAGATGCGTTCAAGGAGCGTTATATAACAAAGCCTCACCAGAAACCAGT  
CCGTTTTGACTGTTTTGAGAAAAAAGCAAGATGCATTGCCAAAATACTAATTGCCAGCATG  
ACTGGGGAATCATAGTAAAGTACAAGACATTTGATGATCTACCAGTGATCAAATCAAAGC  
TTCGTAGTAGAGAATGCTGAAACTGGGGCACAAATGGATTTTCAGAAATGGAAAGATATTA  
ATTTTTCATTGAAGAATTTTGATGAAGAAACATCCAGCTGA

>aquila\_chrysaetos\_canadensis-rig1

ATGACGGCGGAGGAGAAGAGGAGCCTGCAGTGCTACAGGCGGTACATCGAGAAGACCCT  
GAACCCCATCTACATCCTGGGCAACATGACGGACTGGCTGTCCGACGAGGTGAAGGAGAG  
AGTCCGGAAGGAGGAGGAGAAGGGGGTGACGGCGGCCGCGCTGTTCTGACGCC  
ATCCTGCAGCTGGAGGCGGAGGGCTGGCTGCGGGGCTTCTGGACGCCCTGGTTGCAGC

AGGGTACACTGGACTGGCAGAAGCAATTGAAAACCTGGGACTTCAGCAAACCTGGAAAACTA  
GAGTTGCACAGACAGCTGTTGAAGCGGATAGAAGCAACAATGCTAGAAGTTGATCCGGTA  
GCACTCATGCCGTACATAAACATGTGCCTGATAGAAAGGGAGTGTGAGGAGATCCTGCAG  
GTCAGCGAATACAGAAGCAAAGCAGCCGGGATAACTAACTCATTGAATGTCTCTGTTCGAT  
CGGATAAGGAAAACCTGGCCAAAAAGCCTTCAGCTAGCACTAGATAACACAGGATATTACAA  
TGCAAGTGAACCTGTGGGATATAAGAGAAGATAATGGCAAAGATGTGGATGGTGAAATGACA  
GATGCCTCTGAGAACAGCTTTGAAACCATGGTGACGTTTTCTGAAGAAGCAGAATGTGGTA  
ATAATCTCAGTGAAAATCTCTGTTGAGCTTCAGAAGGGTTCTATCAGTCTTCACCTGTTTAT  
GAACCAAAGAAGGCTCGGAGCTACCAGACTGAACTTGCGCAGCCTGCTATCGATGGGAAA  
AACACATTGATATGTGCCCCCTACAGGATCTGGAAAACTTTTGTGGCACTTCTGATTTGTGA  
ACACCATTTCCAAAACATGCCCTCAGGACAAAAGGCCAAAAGTTGTCTTTCTTGCAACCAAA  
GTGCCAGTGTACGAACAACAGAAAACCTGTATTCAAGCAGCATTGTTGAAAGAAGTGGATATT  
CTGTTCAAGGAATTAGTGGTGAAACAGTTGCAAATGTCTCCGTAGAAAAGGTTATACAGGA  
CAGTGACATCATTGTGCTAACACCCCAGATTCTTGTGAATAGCATTGAGGAAGGGATCCTC  
AGCTCCCTCTCCATCTTCACTCTGATGATATTTGATGAGTGCCACAACACTACGGGCAATC  
ACCCTTACAATGTGTTAATGAGTAGATACCTGGAACAAAAATTTGACTCTGCAAGCCAGCTG  
CCTCAGATTGTAGGTTTAACTGCTTCTGTTGGAGTTGGTAATGCCAAGAGCACCAAGGAAA  
CGATAGAGCACATCTGTACCCTCTGCTCCTACCTTGACATACAGGCCATATCCACTGTCAG  
AGAGAACAACAGGATCTGCAGAGATTTGCAAACAAGCCAGAAACACATGTCAGATGGGTT  
AAAATGCGAGTTCAGAATCACTTTGCAGACATTATCTCAGGTCTGATGTCTGAGACAGAGG  
CGTTGATGAGGAGGATTTACTCAGTGGACACTATCTCCCAGATCAACAAGAATGATTTTGG  
AACACAGAAGTATGAACACTGGATAGTTGCCACTCAGAAGAAATGCAGGCTGTTGCAACTG  
GCAGATAAGGAGAAGGAGAGCAGCATTGTTAGAGACCTTTTCATTTGCACTGAACACCTGC  
GGAAATTCAACGATGCTCTCATCATCAGTGAAGATGCCCCGATTGAAGATGCTTTAGCCTA  
CCTAACTGAATTTTTTCACAAATGTCAAAAATGGACCATATACAGAGTTAGAGAAGAACTGA  
CAGCCAAATTTCAAGAGAAAGAACCAGAACTGACTGCCCTTTCAAAGATGAGTCAAATGA  
GAATCCTAAGCTGGAAGAGCTTGCTTGCATCCTGGAGGAAGCATACCGCTATAACCCAGA  
GACTCACACTCTTCTCTTTGCTAAGACAAGAGCCTTAGTAGCTGCTTTGAAGAAGTGGATA  
GAAGCAAACCCTCTACTTAGCCACATAAAGCCAGGTGTGTTGATGGGTCTGGAAGAAGA  
GATCAAAAAACAGGTATGACCCTCCCAATGCAGAAGGGTGTGCTGGATGCGTTCAAAACCA  
ACAAAGAGAACAGACTGCTAATTGCTACATCTGTTGCTGATGAAGGCATTGATATTTCTGAG  
TGCAACCTTGTTGTGCTCTATGAATACTTCGGTAATGTCACCAAAATGATCCAAGTCAGAGG  
TCGTGGAAGGGCAAAAGACAGCAAGTGCATCCTTGTGACAAGCAAAATAGAAGTGGTTGA  
GAATGAGAAACACAACCGTTACAAGGAAGAAATGATGAATGAAGCTATTGAAAAGCTACAG  
ACTTGGGATGAAACAACATTTGCAAGAAAGATACATGACCTGCAATGAAGGAAAAGGTAT  
TACGAGATTCCAGGAAGAAAGAAACAAGAAGTAAGGTAGTGGAAGGGAAAAAAATCTTCT  
GTGTGGAAGAAATGCAAAGCATATGCCTGCAGTACAGATGACATCAGAGTTATAAAGGAATCT  
CATCACACTGTCCTAGGAGATGCGTTCAAGGAGCGTTATATAACAAAGCCTCACCAGAAAC  
CAGTCCAGTTTGATTGTTTTGAGAAAAAAGCAAGATGTATTGCCAAAATACTAATTGCCAG  
CATGACTGGGGAATCATAGTGAAGTACAAGACATTTGATAATCTACCAGTGATCAAAATCAA  
AAGCTTTGTATTAGAGAATGTTGAAACTGGGACACAAATGGATTTTCAGAAATGGAAGAATA  
TTAATTTTTCTTTGAAGAATTTTGATGTTGAAGAAACATCCAGCTGA

>ara\_ararauna-rig1

ATGACGGCGGAGGAGAAGAGGAACCTGCAATGCTACAGGCGCTACATCGAGAAGAGCCT

GAACCCTGTCTACATCCTGGGCAACATGACAGCCTGGCTGTCGGACGAGGAGAAGGAGC  
GAGTCCGTAAGGAGGAGGAGAAGGGGGTGACGGCGGCCGCGCGCTGTTCTGGATAC  
CATCTTGCTGCTGGAGGCGGAGGGCTGGCTCCGGGGCTTCCTGGATGCCCTGGTTGCAG  
CAGGTTACACTGGGCTGGCAGAAGCAGTCGAAAATTGGGACTTCAGTAAGCTGGAAAAAC  
TGGAGTTGCACAGACAGTTGTTGAAGAGGATAGAAGCAACCATGCTAGAAGTTGATCCGGT  
CGCACTCATGCCTTACATAAACACGTGCCTGATAGAAAGGGAGTGTGATGAGATCCTGCAG  
ATTAGCGAATACAGAAGCAAAGCAGCTGGGATAACTAACTCATTGAATGTCTCTGTCTGAT  
CAGATAAGGAAAACTGGCCAAAAAGCCTTCAGCTGGCACTGGATAACACAGGATATTACAA  
TGCAAGTGAAGTATGGGATATGAGAGGAGATAACAGCAAAGATGTTGATGGTGAAATGACA  
GATGCCTTTAAGAACAGCTTTGAAACCACAATGATGTTTTCTGAGGAGGCAGAATGTGATA  
ATAATCTCAGTGAAAATCTCTGTTCCGGTTCAGAAAGAGTCTATCAGTCTTCGCCTGTTTAT  
GAACCAAAGAAGGCTCGGAGCTACCAGACTGAACTGGCACAGCCTGCTATCAATGGGTAT  
AACACATTGATATGTGCCCCACAGGATCTGGAAAACTTTTGTGGCACTGATGATTTGTG  
AACACCATTTCCAAAACATGCCCTCAGGACAAAAGGCCAAAAGTTGTCTTTCTTGCAACCAA  
CTGCCAGTGTATGAACAACAGAAAAATGTATTCAAGCAGCACTTTGAAAGAAGTGGATATTC  
TGTTCAAGGAATTAGCGGTGAAACAGTTGCAAATGTCTCTGTAGGAAAGGTTATACAAGAC  
AGCGACATCATTGTGCTAACACCCCAGATTCTTGTGAATAGCATCGAGGAAGGGATCCTTA  
GTTCCCTCTCCATCTTCACTCTGATGATATTTGATGAGTGCCACAACACTATGGGCAACCAC  
CCTTACAATGTGTTAATGACCAGATACCTGGACCAAAAATTTGACTCCTCTGCAAGCCAAC  
ACCTCAGATTGTAGGTTTAACTGCTTCTGTTGGAGTTGGTAATGCCACGACCACCAAGGAA  
ACAATAGAGTACGTCTGTACTGTCTGCGCCAGCCTTGACATACAGGCCATATCTACTGTCA  
GAGAGAATAAACAGGATCTGCAGAGATTTGGAAACAAACCAGAAATACATGTCAGATGGGT  
GAAAACGAGAGCTCAAATCACTTTGCAGGGATTATTTCAAGGCCTGATGTCTGAGACAGAG  
GCATTGATGAGAAAGAATTACTCAGTGGATACTATCTCCAGATCAGCAAAAATGATTTTGG  
AACACAGAAATATGAACACTGGGTAGTTGCCACTCAGAAGAAATGTAGACTATTGCAACTG  
GAAGATAAGGAGAAGGAGAGCAGCATTTCAGAGACCTTTTCATTTGCACTGAGCACCTGC  
GGAAATTCAATGATGCTCTCATCATCAGTGAAGATGCCCGCATTGAAGATGCTTTAGCCTA  
CCTAACTGATTTTTTCAGAAATGTCAGAAATGGACCATATACAGAGTTAGAGAAGCAACTTA  
CAGCCAAATTTCAAGAGAAAGAACCAAACTGTTAGCCCTTTCAAAGATGAAGCAAATGA  
GAATCCCAAGCTGGAAGAGCTTGCTTGCATCCTGGATGAAGCATACCACTATAACCCACAG  
ACTCGCACTATTCTCTTTGCAAAGACAAGAGCCTTAGTAGCTGCTTTGAAGAAGTGGATAG  
AAGCAAACCTCTATTTAGCCACATAAAGCCAGGTATATTGATGGGTCATGGAAGAAGAGA  
TCAAAAAACAGGTATGACCCTCCCAATGCAGAAGGATGTACTGGATGCATTCAAACCAAC  
AAAGACACCAGACTGCTAATTGCTACTTCTGTTGCTGATGAAGGCATTGATATTTCTGAGTG  
CAACCTTGTTGTGCTCTATGAATACTTTGGTAATGTCACCAAAATGATCCAAGTCAGAGGTC  
GTGGAAGGGCTAAAGACAGCAAGTGCATCCTCCTGACAAACAAAACAGAAGTGGTTGAGA  
AAGAGAAACAGAACCGTTACAAGGAAGAAATGATGAATGAAGCTGTTGAAGAGCTACAGAA  
TTGGGATAAAAGAACATTTGCAGGAAAGATACATGAATTGCAAAGGAAGGAAAAGGTATTA  
CGAGATTCCAGGAAGAAAGAAACGAGATACAAGGTAGTGGAAGGAAAGAAAAATCTTCTGT  
GTGGAAGTGCAAAGCATTGCGCTGCAGTACAGATGACATCAGAATCATAAAGGAATCTCA  
TCACACTGTCCTAGGAGATGCGTTCAAGGAGCGGTATATAACAAAGCCTCACCATAAACCA  
CGCCAGTTTGATGGTTTTGAGAAAAAAGCAAGATGCATTGCCAAAATATTAAGTCCAGC  
ATGACTGGGGAATTATAGTGAAGTACAGGACATTTGATAATCTACCAGTGATCAAATCAA  
AGCTTTGTAGTAGAAAACATTGCAACTGGAACACAAATGGATTTTCAGAAATGGAAAGATAT



TAATTTTTCTCTGAAGAATTTTGATGCTGAAGAACTGTCCAGCTGA

>aratinga\_solstitialis-rig1

ATGACGGCGGAGGAGAAGAGGAACCTGCAATGCTACAGGCGCTACATCGAGAAGAGCCT  
GAACCCTGTCTACATCCTGGGCAACATGACAGCCTGGCTGTCGGACGAGGAGAAGGAGC  
GAGTCCGTAAGGAGGAGGAGAAGGGGGTGACGGCGGCCGCCGCGCTGTTCTGGATAC  
CCTCTTGCTGCTGGAGGCGGAGGGCTGGCTCCGGGGCTTCCTGGATGCCCTGGTTGCAG  
CAGGTTACACTGGGCTGGCAGAAGCAGTTGAAAATTGGGACTTCAGTAAGCTGGAAAACT  
GGAGTTGCACAGACAGTTGTTGAAGAGGATAGAAGCAACCATGCTAGAAGTTGATCCAGTT  
GCACTCATGCCTTACATAAACATGTGCCTGATAGAAAGGGAGTGTGATGAGATCCTGCAGA  
TTAGCGAATACAGAAGCAAAGCAGCTGGGATAACTAACTCATTGAATGTCTCTGTGATC  
AGATAAGGAAAACTGGCCAAAAAGCCTTCAGCTGGCACTGGATAACACAGGATATTACAA  
GCAAGTGAAGTGTGGGATATGAGAGAAGATAACAGCAAAGATGTTGATGGTGAAATGACAG  
ATGCCTTTAAGAACAGCTTTGAAACCACAATGACGTTTTCTGAGGAGGCAGAATGTGATAAT  
AATCTCAGTGAAAATCTCTGTTGGGTTTCAGAAGAGGTCTATCAGTCTTCGCCTGTTTATGA  
ACCAAAGAAGGCTCGGAGCTACCAGACTGAACTGGCACAGCCTGCTATCAATGGGTATAA  
CACATTGATATGTGCCCCACAGGATCTGGAAAACTTTTGTGGCACTGATGATTTGTGAA  
CACCATTTCCAAAACATGCCCTCAGGACAAAAGGCAAAAGTTGTCTTTCTTGCAACCAA  
GCTGATGTATGAACAACAGAAAAATGTATTCAAGCAGCACTTTGAAAGAAGTGGATATTCT  
GTCCAAGGAATTAGCGGTGAAACAGTTGCAAATGTCTCTGTAGAAAAGGTTATACAAGACA  
GCGACATCATTGTGCTAACACCCCAGATTCTTGTGAATAGCATCGAGGAAGGGATCCTTAG  
TTCCCTCTCCATCTTCACTCTGATGATATTTGATGAGTGCCACAACACTATGGGCAACCACC  
CTTACAATGTGTTAATGACCAGATACCTGGACCAAAAATTTGACTCCTCTGCAAGCCAACTA  
CCTCAGATTGTAGGTTTAACTGCTTCTATTGGAGTTGGTAATGCCAAGACCACCAAGGAAA  
CAATAGAGTACGTCTGTACTGTCTGTGCCAGCCTTGACATACAGGCCATATCTACTGTCAG  
AGAGAACAAACAGGATCTGCAGAGATTTGAAACAAACCAGAAATACATGTCAGATGGGTG  
AAACCGAGAGCTCAAATCACTTTGCAGGGATTATTTTCAGGCCTGATGTCTGAGACAGAGG  
CATTGATGAGAAAGAATTACTCAGTGGATACTATCTCCAGATCAGCAAAAATGATTTTGA  
ACACAGAAATATGAACACTGGGTAGTTGCCACTCAGAAGAAATGTAGACTATTGCAACTGG  
AAGATAAGGAGAAGGAGAGCAGCATTTCAGAGACCTTTTCATTTGCACTGAACACCTGCG  
GAAATTCAATGATGCTCTCATCATCAGTGAAGATGCCCGCATTGAAGATGCTTTAGCCTAC  
CTAACTGATTTTTTCAGAAATGTCAGAAATGGACCATATACAGAGTTAGAGAAGCAACTTAC  
AGCCAAATTTCAAGAGAAAGAACCAAACTGTTAGCCCTTTCAAAGATGAAGCAAATGAG  
AATCCCAAGCTGGAAGAGCTTGCTTGCATCCTGGATGAAGCATACCACTATAACCCACAGA  
CTCGCACTATTCTTTGCAAAGACAAGAGCCTTAGTAGCTGCTTTGAAGAAGTGGATAGA  
AGCAAACCCTCTATTTAGCCACATAAAGCCAGGTATATTGATGGGTCATGGAAGAAGAGAT  
CAAAAAACAGGTATGACCCTCCCAATGCAGAAGGATGTACTGGATGCATTCAAACCAACA  
AAGACACCAGACTGCTAATTGCTACTTCTGTTGCTGATGAAGGCATTGATATTTCTGAGTGC  
AACCTTGTTGTGCTCTATGAATACTTTGGTAATGTCACTAAAATGATCCAAGTCAGAGGTG  
TGGAAGGGCTAAAGACAGCAAGTGCATCCTCCTGACAAACAAAACAGAAGTGGTTGAGAA  
AGAGAAACAGAACCGTTACAAGGAAGAAATGATGAATGAAGCTGTTGAAGAGCTACAGAA  
TGGGATAAAAGAACATTTGCAGGAGAGATACATGAATTGCAAAGGAAGGAAAAGGTATTAC  
GAGATTCCAGGAAGAAAGAAACGAGATACAAGGTAGTGGAAGGAAAGAAAAATCTTCTGTG  
TGGAAGGTGCAAAGCATTTGCCTGCAGTACAGATGACATCAGAATCATAAAGGAATCTCAT  
CACACTGTCCTAGGAGATGCGTTCAAGGAGCGGTATATAACAAAGCCTCACCATAAACCAT

GCCAGTTTGATGGTTTTGAGAAAAAAGCAAGATGCATTGCCAAAATATTAAGTCCACCAT  
GACTGGGGAATTATAGTGAAGTACAGGACATTTGATAATCTACCAGTGATCAAAATCAAAAG  
CTTTGTAGTAGAAAAACATTGCAACTGGAACACAAATGGATTTTCAGAAATGGAAAGATATTA  
ATTTTTCTCTGAAGAATTTTGATGCTGAAGAAGTGTCCAGCTGA

>asio\_otus-rig1

ATGACCGCGGAGGAGAAGAGGAACCTGCAGCGCTGCAGGCGGTACATCGAGAGGAGCCT  
GAACCCCATCTACGTCCTGAGCAACATGACGGACTGGCTGTCCGACGATGTGAAGGAGAG  
AGTCCGGAAGGAGGAGGAGAAGGGGGTGACGGCGGCTGCCGCGCTGTTTCTGGACGCC  
GTCCTGCAGCTGGAGGCGCAGGGCTGGCTCCGAGCCTTCCTGGACGCCCTGGTTGCAGC  
AGGTTACACTGGACTGGCAGAAGCAATTGAAAAGTGGGACTTCAGCAAAGTGGAAAACTG  
GAGTTGCACAGACAGCTCTTGAAGCGCATAGAAGCAACAATGCTAGAAGTTGATCCGGTA  
GCACTCATGCCTTACATAAACATGTGCCTGATAGAAAGGGAGTGTGATGAGATCCTGCAGA  
TTAGCGAATACAGAAGCAAAGCAGCTGGGGTAACTAACTCATTGAATGCCTCTGTGATC  
GGATAAGGAAAACTGGCCAAAAAGCCTTCAGCTGGCACTAGATAATGCAGGATACTACAAT  
GCAAGTGAGCTGTGGGATATGAGAGAAGATAATGGCAACGATGTTGATGGTGAAATGACA  
GACGTCTCTGAGAACAGCTTTGAAACCACAATTACATTTTTTGAAGAAGCAGAATGTGATAA  
TAATCTCAGTGAAAATCTTTGTTTCAGCTTCAGAAAGGGACCTGTCAGTCTTCACCTGTTTATG  
AACCAAAGAAGGCTTGGAGCTACCAGACTGAACTTGACACAGCCTGCTATCAATGGGAAAAA  
CACATTGATATGTGCCCCACAGGATCTGGAAAACTTTTGTGCAATTCTGATTTGTGAAC  
ACCATTTGCAAAACACGCCCTCAGGACAAAAAGCAAAAGTTGTCTTTCTTGCAACCAAAGT  
GCCAGTGTATGAACAACAGAAAAATGTATTCAGGCAGCATTTTGAAAGAAGTGGATATTCT  
GTTCAAGGAATTAGTGGTGAAACAGTTGCAAATGTTTCTGTAGAAAAGGTTATACAGGACA  
GTGACATCATTGTGCTAACACCCACAGATTCTTGTGAATAGCATTGAGGAGGGGATCCTTAG  
CTCCCTCTCCATCTTCACTCTTATGATATTTGATGAGTGCCACAACACCACGGGCAATCACC  
CTTACAATGTGTTAATGACCAGATACCTGCAACAAAAATTTGACTCCTCTGAAAGCCAGCTG  
CCTCAGATTGTAGGTTTAACTGCTTCTGTTGGAGTTGGTAATGCCAAGAGTGTCAAGGAAA  
CGATAGAGCACATCTGTACCCTCTGCTCCTACCTTGACATACAGGCCCTGTCCACTGTCAG  
AGAGAACAAAGAGGATCTGCAGAGATTGAGAAACAAGCCAGAAACATATGTCAGATGGGTT  
AAAATGCGAGTTCAGAATCACTTTGCAGACATTATCTCAGGTCTGATGTCTGAGACAGAGG  
CGCTGATGAGGAAGATTTACTTAGTGGATACTATCTCCCAAATCAACAAGAATGATTTTGA  
ACACAGAAATATGAACACTGGATAGTTGACACTCAGAAAAAATGCAGGCTGTTGCAACTGG  
AAGATAAGGAGAAGGAGAGCAGCATTGTAGAGACCTTTTCATTTGCACTGAGCACCTGCG  
GAAATTCAATGATGCTCTCATCATCAGTGAAGACGCCCCGATTGAAGACGCTTTAGCTTAC  
CTAACTGAATTTTTACAAATGTTAAAAATGGACCATATACAGAATTAGAGGAGCAACTAAC  
AGCCAAATTTCAAGAGAAAGAACCAAGCACTGACTTCCCTTTCAAAGATGAATCAAATGAGA  
ATCCCAAGCTGGAAGAGCTTGCTTGCATCCTGGATGAAGCATACCGCTATAACCCACAGAC  
TCGCACTCTTCTCTTTGCTAAGACAAGAGCCTTAGTAAGTGTCTTTGAAGAAGTGGATAGAA  
GCAAACCCTCTACTTAGCCACATAAAGTCAGATGTGTTGATGGGTCGTGGAAGAAGAGATC  
AAAAACAGGTATGACCCTCCCAATGCAGAAGGGTGTACTGGATGCATTCAAACCAACAA  
AGACAGCAGACTGCTAATTGCTACCTCTGTTGCTGACGAAGGCATTGATATTTCTGAGTGC  
AACCTTGTTGTGCTCTATGAATACTTTGGTAATGTCACCAAAATGATCCAAGTAAGAGGTGC  
TGGAAGGGCAAGAGGTAGCAAGTGCATCCTTGTGACAAGCAAAACAGAATTGGTTGAGAA  
TGAGAAACACAACCGTTACAAGGAAGAAATAATGAATGAAGCTATTGAAAAGCTACAGAATT  
GGGATGAAACAACATTTGCAAGAAAGATACATGACCTGCAAATGAAGGAAAAGGTATTACG

AGATTCCAGGAAGAAAGAAACAAGACGTACAGTAGTGGAAGGGAAAAAAATCTTCTGTGT  
GGAAAATGCAAAGCATATGCCTGTAGTACAGATGACATCAGAGTTATAAAGGAATCTCATC  
ACACTGTCCTAGGAGATGCGTTCAAGGAGCGTTACATAACAAAGCCTCACCAGAAACCAGT  
CCAGTTTGAAGTGTGTTTGAAGAAAAAAGCAAGATGCATTGCCAAAATACTAATTGCCAACATG  
ACTGGGGAATCATAGTGAAGTACAAGACATTTGATAACCTACCAGTGATCAAAATCAAAAG  
CTTTGTAGTAGAGAACGTTGAAACTGGGAGACAAATGGAACCTCAGAAATGGAAAAATATTA  
ATTTTTCTTTGAAGAATTTTGATGAAGAAACATCCAGCTGA

>aythya\_fuligula-rig1

ATGACGGCGGAGGAGAAGCGGGGCCTGCAGTGCTACCGCCGCTACATCGAGCGGAGCCT  
CAACCCGGTCTACGTGCTGGGCAACATGACGGAAGTGGCTGCCCGACGAGCTGCGGGAGA  
GGATCCGCAAGGAGGAGGAGAGGGGGGTGAGCGGCGCCGCGCGCTCTTCCTGGACGC  
CGTGCTGCAGCTGGAGGCCCGGGGGTGGTTCCGAGGGATGCTGGACGCGATGCTGGCC  
GCAGGTTACACAGGACTGGCAGAAGCAATTGAGAAGTGGGACTTCAGCAAAGTGGAAAA  
CTGGAGTTACACAGACAGCTGTTGAAGCGGATAGAGGCAACAATGTTAGAAGTCGACCCA  
GTAGCGCTCATTCCCTACATAAACACGTGCCTGATAGACAGGGAGTGCGAAGAGATCCAG  
CAGATTAGCGAAAACAGAAGCAAAGCAGCAGGCATAACTAACTCATTGAATGTCTCTGTC  
GGTCGGATAAGGAGCACTGGCCAAAAGCCTTCAGCTGGCACTAGATACCACAGGATATT  
ATAGTGCAAGTGAAGTGTGGGATATAAGAGAAGATAATGCCAAAGATGTTGACAGTGAAAT  
GACAGATGCCTCTGAGGACTGCCTTGAAGCCAGTATGACGTATTCTGAAGAAGCAGAACCT  
GATGATAATCTCAGTGAAAATCTTGGTTCAGCTGCAGAAGGAATTGGCAAACCTCCACCTG  
CCTATGAAACAAAGAAGGCTCGGAGCTACCAGATTGAAGTGCACAGCCTGCTATCGATGG  
GAAAAATGCCTTAATATGTGCCCTACTGGATCTGGAAAACTTTTCTCTCAATTCTGATTT  
GCGAACACCATTTCCAAACATGCCTGCAGGACGAAAGGCGAAAGTTGTCTTTCTTGCAAC  
TAAAGTCCCAGTGTATGAACAGCAGAAAAATGTCTTCAAGCACCATTTTGAAAGACAAGGAT  
ATTCTGTTCAAGGAATTAGTGGTGAAAATTTTCAAATGTCTCTGTGCAAAAAGTTATAGAG  
GATAGTGACATCATCGTAGTGACACCCAGATCCTGGTGAATAGCTTCGAGGACGGGTCC  
CTTACCTCGCTCTCCATTTTCACTCTGATGATATTCGATGAGTGCCACAACACTACAGGCAA  
CCACCCTTACAACGTGTTAATGACCAGGTATCTGGAGCAGAAATTTAACTCCTCTGCAAGT  
CAACTGCCACAGATTTTAGGTTTGAAGTGTCTTCTGTTGGAGTTGGTAATGCCAAGAACATTGA  
GGAAACAATAGAGCACATCTGTAGTCTCTGCTCCTACCTTGACATACAGGCCATATCCACT  
GTCAGAGAGAACATACAAGAAGTGCAAAAGGTTCAAGCAAGCCAGAAATAGATGTCAGAT  
TGGTTAAGAGACGAGTTCACAATCCCTTTGCAGTTATTATCTCAAATCTGATGTCCGAGACA  
GAGGCACTGATGAGGACAATTTACTCAGTGGATACTGTCTCCCAAACAGCAAGAAAGATT  
TTGGAACACAGAACTATGAACACTGGATAGTTGTCACTCAGAGGAAATGCAGACTGCTGCA  
GCTAGAAGACAAAGAGGAGGAGAGCAGGATATGTAGAGCCCTTTTCATTTGCACTGAACAC  
CTGCGGAAATACAATGATGCCCTCATCATCAGTGAAGATGCCCGCATCATAGATGCTTTAT  
CCTACCTGACCGAGTTTTTCAAAATGTCAAGAATGGACCATACAGAAATTAGAGCAACA  
CCTGACGGCCAAATTTCAAGAGAAAGAACCAGAACTGATTGCCCTTTCAAAGACGAAACA  
AATGAGAATCCTAACTGGAAGAGCTTGCCTGCATCCTGGATGATGCATACCGCTATAACC  
CACAGACTCGCACTCTTCTCTTTGCTAAGACAAGAGCCTTAGTATCTGCTTTGAAGAAGTGT  
ATGGAGGAAAACCCTATCCTTAGCTACATAAAGCCAGGTGTTCTGATGGGACGCGGAAGA  
AGAGATCAAACAACAGGTATGACCCTCCTAAGCCAGAAGGGTGTGCTGGATGCGTTCAA  
ACCAGCAAGGACAACAGGCTGCTCATTGCTACATCTGTTGCTGATGAAGGCATTGATATTG  
TCCAGTGCAACCTTGTTGTGCTCTATGAATACTCCGGTAACGTGACCAAAATGATCCAAGT

CAGAGGTCGTGGAAGGGCAGCAGGCAGCAAGTGCATCCTTGTGACAAGCAAAACAGAAGT  
GGTTGAGAATGAAAAATGCAACCGTTATAAGGAAGAAATGATGAATAAAGCTGTTGAAGAG  
ATCCAGAAATGGGATGAAGAAACATTTGCAAAAAAGATACATAATCTGCAAATGAAGGAAA  
GGGTGTTACGAGATTCCAGGAGGAAAGAAATAAAACCTAAAGTAGTGGAAGGCCAGAAGA  
ACCTCCTGTGTGGAATGCAAAGCATATGCCTGCAGTACAGATGACATCAGAATTATAAA  
GGAATCTCATCACATTGTCCTAGGAGAAGCATTCAAGGAGCGTTATATAACAAAGCCTCAT  
AAGAAACCAATGCAGTTTGTATGGTTTTGAGAAAAAAGCAAGATGTATTGCCGAAATAATAA  
TTGCCAGCATGACTGGGGAATCACAGTGAAGTACCTGACATTTGACAATCTACCAGTGATC  
AAAATCAAAAGCTTCGTAATGGAGAGTACTGCAACTGGAACACAAATGGACTTTTCAGAAAT  
GGAAAAGCATTAAATTCTTCTTTGAAGAATTTTGATGTTGAAGAAATGTCCAACCTTGTACCCA  
CCATTTTAG

>balearica\_regulorum-rig1

ATGACCGCCGAGGAGAAGAAGAGCCTGCAGTGCTACAGGCGGTACATCGAGAAGAGCCT  
GAACCCCGTCTACATCCTAAGCAACATGACGGACTGGTTGTCCGACGAGGTGAAGGAGAG  
AGTCCGGAAGGAGGAGGAGAAGGGGGTGACGGCGGCCGCGCTGTTTGTGGATACC  
ATCCTGGAGCTGGAGGCGGAGGGCTGGCTCCGGGGCTTCCTGAACGCCCTGGTTGCAGC  
AGGTTACACTGGACTGGCAGAAGCAATTGAAAAGTGGGACTTCAGCAAAGTGGAAAACTG  
GAACTGTACAGACAGCTGTTGAAACGGATTGAAGCAACAATGCTAGAAATTGATCCGGTAG  
CACTCATGCCCTACATAAACACGTGCCTGATAGAAAGGGAGTGTGATGAGATCCTGCAGAT  
TAGCGAATACAGAAGCAAAGCAGCCGGGATAACTAAGCTCATTGAATGTCTGTCTGTCGATCG  
GATAAGGAAAACTGGCCGAAAAGCCTTCAGCTGGCACTAGATAACACAGGATATTACAATG  
CAAGTGAAGTGTGGAATATGAGAGAAGAAGATGGCAAAGATGTTGATGGTGAAGTGACAG  
ATGCCTCTGAGAACAGCTTTGAAACCATGATAACGTTTTCTGAAGAAGCAGAACCTGATAAT  
AATCTCAGTGAAAATCTCTGTTTCAAGCTTCAGAAGAAATCTATCAGCCTTCACCTATTTATGA  
ACCAAAGGCGGTTTCGGAGCTACCAGATTGAACTTGCGCAGCCTGCTATCAATGGGAAAAA  
CACATTGATATGTGCCCCCACAGGATCTGGAAAAACTTTTGTGGCACTTATGATTTGTGAAC  
ATCATTTCCAAACATGCCCGCAGGACGAAAGGCCAAAAGTTGTTTTCTTGCAACTAAAGT  
GCCAGTGACGAACAACAGAAAAATGTATTCAAGCAGCATTGTTGAAAGAAGTGGATATTCT  
GTTCAAGGAATTAGTGGTGAACAGTTGCAAATGTCTCTGTAGAAAAGGTTATACAGAACA  
GTGACATCGTTGTGCTGACGCCCCAGATTCTTGTGAATAGCATTGAGGAAGGGATCCTTAG  
CTCCCTGTCCATCTTCACTCTGATGGTATTTGATGAGTGCCACAACACTACAGGCAACCAC  
CCTTACAGTGTGTTAATGACCAGATACCTGCAACAAAAATTTGACTCCTCTGCAACCAGCT  
GCCTCAGATTGTAGGTTTAACTGCTTCTGTTGGAGTTGGTAATGCCAAGAGCATCAAGGAA  
ACGATAGAGCACATCTGCACCCTCTGCTCCTACCTTGACATACAGGCCATATCCACTGTCA  
GAGAGAACAAGAGGATCTGCAGAGATTTGAAACAAGCCAGAAATGCATGTCAGATGGG  
TTAAAATGCAAGTTCAGAATCACTTTGCAGACATTATCTCAGGTCTGATGTCTGAGACAGAG  
GAGTTGATGAGGAAGATTTACTCAGTGGATAATATCTCTCAAATCAACAAGAATGATTTTGG  
AACACAGAAATATGAGCACTGGATAGTTGCCACTCAGAAAAAATGCAGACTGTTGCAACTG  
GCAGATAAAGAGAAGGAGAGCAGCCTTTGTAGAGACCTTTTCATTTGCACTGAACACCTGC  
GGAAATTCAACGATGCTCTCATCATCAGTGAAGATGCCCGCATTGAAGATGCTTTATTCTAC  
CTAACTGAATTTTTTCATAAATGTCAAAAATGGACCATATACAGAGTTAGAGAAGCAACTGAC  
AGCCAAATTTCAAGAGAAAGAACCGGAACTGATTGCCCTTTCAAAAGATGAATCAAACGAG  
AATCCCAAGCTGGAAGAGCTTGCCTGCATCCTGGATGAAGCATACCGCTATAACCCACAGA  
CTCGCACTCTTCTCTTTGCTAAGACAAGAGCCTTAGTAGCTGCTCTGAAGAAATGGATAGA

AGCAAACCCTCTACTTAACCACATAAAGCCAGGTGTGTTGATGGGTCGTGGAAGAAGAGAT  
CAAAAAACAGGTATGACCCTCCCGATGCAGAAGGGTGTACTGGATGCATTCAAAACCAACA  
AAGACAGCAGACTGCTAATTGCTACATCTGTTGCTGACGAAGGCATTGATATTTCTGAGTG  
CAACCTTGTTGTGCTCTACGAATACTTCGGTAATGTCACCAAAATGATCCAAGTGAGAGGT  
CGTGGAAGGGCAAGAGACAGCAAGTGCATCCTTGTGACAAACAAAAAAGAAGTGGTTGAC  
AATGAGAAACAGAACCGTTATAAGGAAGAAATGATGAATGAAGCTATTGAAGAGCTACAGA  
ATTGGGATGAAACAACATTTGCAAGAAAGATACATGACCTGCAAATGAAGGAAAAGGTATT  
AAGAGATTCCAGCAAGAAAGACACAAGATGTAAGGCAGTGGAAGGAAAAAAAATCTTCTC  
TGTGGAAAATGCAAAGCATATGCCTGCAGTACAGATGACATCAGAGTTATAAAGGAATCTC  
ATCACACTGTCCTAGGAGATGCGTTCAAGGAACGTTATATAACAAAGCTTCACCAGAAACC  
AGTCCGGTTTGACTGTTTTGAGAAAAAAGCAAGATGCATTGCCAAAATACTAATTGCCAGC  
ATGACTGGGGAATCATAGTAAAGTACAAGACATTTGATGATCTACCAGTGATCAAAATCAAA  
AGCTTCGTAGTAGAGAACGTTGAAACTGGGGCACAAATGGATTTTCAGAAATGGAAAGATA  
TTAATTTTTTCATTGAAGAATTTTGATGAAGAAACGTCCAGCTGA

>bubo\_blakistoni-rig1

ATGACCGCGGAGGAGAAGAGGAACCTGCAGCGCTGCAGGCGGTACATCGAGAGGAGCCT  
GAACCCCATCTACGTCCTGAGCAACATGACGGACTGGCTGTCCGACGATGTGAAGGAGAG  
AGTCCGGAAGGAGGAGGAGAAGGGGGTGACGGCGGCCCGCGCTGTTTCTGGACGCC  
GTCCTGCAGCTGGAGGCGCAGGGCTGGCTCCGGGCCTTCCTGGACGCCCTGGTTGCAGC  
AGGTTACACTGGACTGGCAGAAGCAATTGAAAAGTGGGACTTCAGCAAAGTGGAAAAAGT  
GAGTTGCACAGACAGCTCTTGAAGCGCATAGAAGCAGCAATGCTAGAAGTTGATCCGGTA  
GCACTCATGCCTTACATAAACACGTGCCTGATAGAAAGGGAGTGTGATGAGATCCTGCAGA  
TTAGCGAATACAGAAGCAAAGCAGCTGGGGTAACTAACTCATTGAATGCCTCTGTGCATC  
GGATAAGGAAAAGTGGCCGAAAAGCCTTCAGCTGGCACTAGATAATGCAGGATATTACAAT  
GCAAGTGAAGTGTGGGATATGAGAGAAGATAATGGCAAAGATGTTGATGGTGAAATGACAG  
ACGTCTCTGAGAACAGCTTTGAAACCACAATTACATTTTTTGAAGAAGCAGAATGTGATAAT  
AATCTCAGTGAAAATCTTTGTTCAACTTCAGAAGGGACCTGTCAGTCTTCACCTGTTTATGA  
ACCAAAGAAGGCTTGGAGCTACCAGACTGAACTTGACAGCCTGCTATCAATGGGAAAAAC  
ACATTGATATGTGCCCCACAGGATCTGGAAAACTTTTGTGCGCACTTCTGATTTGTGAACA  
CCATTTCCAAAACATGTCCTCAGGACAAAAAGCAAAGTTGTCTTTCTTGCAACCAAAGTGC  
CAGTGTATGAACAACAGAAAAATGTATTCAGGCAGCATTTTGAAGAAGTGGATATTCTGTT  
CAAGGAATTAGTGGTGAAACAGTTGCAAATGTTTCTGTAGAAAAGGTTATACAGGACAGTG  
ACATCATTGTGCTAACACCCCAAGATTCTTGTGAATAGCATTGAGGAGGGGATCCTTAGCTC  
CCTCTCCATCTTCACTCTGATGATATTTGATGAGTGCCACAACACCACGGGCAATCACCTT  
TACAATGTGTTAATGACCAGATACCTGCAACAAAAATTTGACTCCCCTGCAAGCCAGCTGC  
CTCAGATTGTAGGTTTAACTGCTTCTGTTGGAGTTGGTAATGCCAAGAGTGTCAAGGAAAC  
GATAGAGCACATCTGTACCCTCTGCTCCTACCTTGACATACAGGCCCTGTCCACTGTCAGA  
GAGAACAAAGAGGATCTGCAGAGATTCAGAAACAAGCCAGAAACATATGTCAGATGGGTTA  
AAATGCGAGTTCAGAATCACTTTGCAGACATTATCTCAGGTCTGATGTCTGAGACAGAGGC  
ATTGATGAGGAAGATTTACTCAGTGGATACTATCTCCCAAATCAACAAGAATGATTTTGGAA  
CACAGAAATATGAACACTGGATAGTTGCCACTCAGAAAAAATGCAGGCTGTTGCAACTGGC  
AGATAAGGAGAAGGAGAGCAGCATTTGTAGAGACCTTTTCATTTGCACTGAGCACCTGCGG  
AAGTTCAATGATGCTCTCATCATCAGTGAAGACGCCCGCATCGAAGATGCTTTAGCTTACC  
TAACTGAATTTTTTCACAAATGTTAGAAATGGACCATATACAGAATTAGAGGAGCAACTAACA

GCCAAATTTCAAGAGAAAGAACCAGAACTGACTTCCCTTTCAAAGATGAATCAAACGAGA  
ATCCCAAGCTGGAAGAGCTTGCTTGCATCCTGGATGAAGCATACCGCTATAACCCACAGAC  
TCGCACTCTTCTCTTTGCTAAGACAAGAGCCTTAGTAGCTGCTTTGAAGAAGTGGATAGAA  
GCAAACCCTCTACTTAGCCACATAAAATCAGATGTGTTGATGGGTCGTGGAAGAAGAGATC  
AAAAAACAGGTATGACCCTCCCAATGCAGAAGGGTGTACTGGATGCATTCAAACCAAGAA  
AGACAGCAGACTGCTAATTGCTACCTCTGTTGCTGGCGAAGGCATTGATATTTCTGAGTGC  
AACCTTGTTGTGCTCTATGAATACTTCGGTAATGTCACCAAAATGATCCAAGTAAGAGGTGCG  
TGGAAGGGCAAGAGGTAGCAAGTGCATCCTTGTGACAAGCAAACAGAAAGTGGTTGAGAA  
TGAGAAACACAACCGTTACAAGGAAGAAATGATGAATGAAGCTATTGAAAAGCTACAGAAT  
TGGGATGAAACAACATTTGCAAGAAAGATACATGACCTGCAAATGAAGGAAAAGGTATTAC  
GAGATTCCAGGAAGAAAGAAACAAGACGTACAGTAGTGAAGGGGAAAAAAATCTTCTGTG  
TGGAAGAAATGCAAAGCATATGCCTGTAGTACAGATGACATCAGAGTTATAAAGGAATCTCATC  
ACACTGTCCTAGGAGATGCGTTCAAGGAGCGTTACATAACAAAGCCTCACCAGAAACCAAGT  
CCAGTTTGATTGTTTTGAGAAAAAAGCAAGATGCATTGCCAAAATACTAATTGCCAACATG  
ACTGGGGAATCATAGTGAAGTACAAGACATTTGATAACCTACCAGTGATCAAATCAAAG  
CTTTGTAGTAGAGAACGTTGAAACTGGGACACAAATGGAACCTCAGAAATGGAAAAATATTA  
ATTTTCTTTGAAGAATTTTGATGTTGAAGAAACATGCAGCTGA

>buceros\_rhinoceros-rig1

ATGACGGCGGAGGAGAAGAGGAGCCTGCAGTGCTACAGGCGGTACATCGAGAAGACCCT  
GAACCCCATCTACATCCTGAGCAACATGACGGAGTGGCTGTCGGACGAGATGCAAGAGAA  
AGTGCGGAAGGAGGAGGAGAAGGGGGTGACGGCGGCCGCCGCGTTGTTTCTGGATGCC  
GTCTTGACAGCTGGAGGCGGAGGGCTGGCTCCGGGGCTTCCTGGACGCCCTGGTTGCGGC  
AGGTTACACTGGCCTGGCAGAAGCAATTGAAAAGTGGGACTTCAGCAAAGTGGAAAACTG  
GAGTTACACAGGCAGCTGTTGAAGCGGATAGAAGCAACAATGCTAGAAGTTGACCCAGTA  
GCTGTCATGCCTTACATAAACACATGCCTGATAGAAAGGGAGTGCGCTGAGATTCTGCAGA  
TTAGCGAATACAGAAGCAAAGCAGCTGGGATAACTAAGCTCATTGAATGTCTCTGTCGATC  
GGATAAGGAAAACTGGCCTAAAAGCCTTCAGCTGGCACTAGATTACACAGGATATTACAAC  
GCAAGTGAAGTGTGGGATATGAGAGAAGGTAATGGCAAAGATGTTGATGGTGATATGACA  
GATGGCTCTGAGAACAGCTTTGAAACCACAGTGACATTTTCTGAAGAAGCAGAAATATGATA  
ATCTCAGTGAAAATCTCTGTTTCAGATTCAGAAGGGATTTATCAGTCTTCACCTGTTTATGAA  
TCAAAGAAGGCTCGGAAGTACCAGACTGAACTTGCACAGCCTGCTCTCAATGGGAAAAACA  
CACTGATATGTGCCCCCACAGGAAGTGGAAAACTTTCTGGCACTTATGATTTGTGAACA  
CCATTTCCAAAACACACCCTCAGGACAGAAGGCGAAAGTTGTCTTTTTTGAACCAAAGTG  
CCCGTGTACGAACAGCAGAAAAATGTATTTAAGCAGCATTTTGAAAGAAGTGGATACTCTG  
TTCAAGGAATTAGTGGTGAAACAGTTGCAAATGTCTCTGTAGAAAAGGTCATACAAGACAG  
TGACATCATTGTGCTAACACCCCAGATTCTTGTGAACACCATTGAGCAAGGGATCCTTAGC  
TCCCTCTCCATCTTCACTCTGATGATATTTGATGAGTGCCACAACACTACGGGCAACCACC  
CTTACAATGTGTTAATGACCAGATACCTGGAAGAAAAATTTGACTCCTGCGCAAACCAGCT  
GCCTCAGATTGTAGGTTTAACTGCTTCAGTTGGAGTTGGTAGTGCCAAGACCGTCAGGGAA  
ACAGTGGAGCACATCTGTACCCTCTGCTCCTACCTTGATATACAGACCATATCCACGGTCA  
GAGTGAACAAAGAGGAGCTGCAGAGATTTGAAACAAGCCAGAAACATATGTCAGATGGG  
TTAAGATGCGAGTTCAGAATCCCTTTGCAGACGTTATCTCAGGTCTGATGTCCGAAACACA  
GGAGTTGATGAGGAAGATTTTCTCAGTGGGTACTATGTCCCAAATAAAAAAGAATTATTTTG  
GAACACAACAATTTGAACACTGGATAGTTGCCACTCAGAAGAAATGCAGACTGTTGCAACT

GGCAGATAAGGAGAAGGAGAGCAGCGTTTGTAGAGACCTTTTCATTTGCACTGAACACTTG  
CGAAAATTCAATGATGCTCTCATCATCAGTGAAGATGCCCGCATTGAAGATGCTTTAGCCTA  
CCTAACTGAATTTTTACAAATGTCAAAAATGGACCATATACAGAGCTAGAGAAGCAACTGA  
CAGCCAAATTTCAAGAGAAAGAACCAGAACTGACTGCCCTTTCACAAGATGAATCAAATGA  
GAATCCCAAGCTAGAAGAACTTGCTTGCATCCTGGATGAAGCATACCGCTATAACCCACAG  
ACTCGCACTCTTCTCTTTGCTAAGACAAGAGCCTTAGTAGCTGCTTTGAAGAAGTGGATAG  
AAGCAAACCCTCTACTTAGCCACATAAAGCCAGATATGTTGATGGGTCGTGGAAGAAAAGA  
TCAAAAAACAGGTATGACACTTCCAATGCAGAAGGATATACTGGATGCATTCAAAACCAAC  
CAAGACATCAGACTGCTAATTGCTACATCTGTTGCTGATGAAGGCATTGATATTTCTGAGTG  
CAACCTTGTTGTGCTCTATGAATACTTTGGTAATGTCACCAAATGATCCAAGTCAGAGGTC  
GTGGAAGGGCAAAAGACAGCAAGTGCATCATTGTGACAAAGCAAAACAGAAGTTGTTGAGA  
ATGAGAAACAAAACCGTTACAAGGAAGAAATGATGAACGAAGCAATTGAAGAGCTACAGAA  
TTGGGATGAAACAAGATTTGCAAGGAAGATACGTGACCTGCAAATGAAGGAAAAAGTGCTA  
CGAGATGCCAGGAAGAAAGAAATAAGGCATCAGGTAGTGGAAGGGAAAAAAATCTTCTGT  
GTGGAATGCAAAGCATATGCCTGCAGTACAGATGACATCAGAGTTATAAAGGCTTCTCA  
TCACACTGTCCTAGAAGATGCATTCAAGGAGCGTTACATAACAAAGCCTCACCGGAAACCA  
GTCCAGTTTGATTGTTTTGAGAAAAAAGCAAGATGCATTGCCGAAATACTAATTGCCAACA  
TGAAGTGGGGAATCATAGTGAAGTACAAGACATTTGATAATCTACCGGTGATCAAAATCAAAA  
GCTTTGTAGTAGAGAATGTTGAACTGGGACACAAATGGATTTTCAGAAATGGAAAAATATT  
AATTTTTCTTTGAAGAATTTTGATGATGAAGAATCATCCAGATGA

>butastur\_indicus-rig1

ATGACGGCGGAGGAGAAGAGGAGCCTGCAGTGCTACAGGCGGTACATCGAGAAGAGCCT  
GAACCCCGTCTACATCCTGGGCAACATGACGGACTGGCTGTCCGACGAGGTGAAGGAGA  
GGGTCCGGAAGGAGGAGGAGAAGGGGGTGACGGCGGCCGCGCTGTTCTTGACGC  
CATCCTGCAGCTGGAGGCGGAGGGCTGGCTGCGCGGCTTCTTGACGCCCTGGTTGCAG  
CAGGGTACACTGGACTGGCAGAAGCAATTGAAACTGGGACTTCAGCAAACCTGGAAAAAC  
TAGAGTTGCACAGACAGCTGTTGAAGCGGATAGAAGCAACAATGCTAGAAGTTGATCCGGT  
AGCACTCATGCCGTACATAAACATGTGCCTGATAGAAAGGGAGTGTGAGGAGATCCTGCA  
GGTCAGCGAATACAGAAGCAAAGCAGCTGGGATAACTAACTCATTGAATGTCTCTGTGCA  
TCGGATAAGGAAAACCTGGCCAAAAAGCCTTCAGCTAGCACTAGATAACACAGGATATTACA  
ATGCAAGTGAAGTGTGGGATATAAGAGAAGATAATGGCAAAGATGTGGATGGTGAAATGAC  
AGATGCCTCTGAGAACAGCTTTGAAACCGTGGTGACATTTTCTGAAGAAGCAGAATGTGAT  
AATAATCTCAGTGAAAATCTCTGTTGAGCTTCAGAAGGGATCTATCAGTCTTCACGTGTTTA  
TGAACCAAAGAAGGCTCGGAGCTACCAGACTGAACTTGCGCAGCCTGCTATCAATGGGAA  
AAACACATTGATATGTGCCCTACAGGAACCTGGAAAAACCTTTGTGGCAATTCTGATTTGTG  
AACACCATTTCCAAAACATGCCCTCAGGACAAAAGGCGAAAAGTTGTCTTTCTTGCAACTAAA  
GTGCCAGTGACGAACAACAGAAAACCTGTATTCAAGCAGCATTTTGAAAGAAGTGGATATT  
CTGTTCAAGGAATTAGTGGTGAAACAGTTGCAAATGTCTCCGTAGAAAAGGTTATACGGGA  
CAGTGACATCATTGTGCTAACACCCCAGATTCTTGTGAATAGCATTGAGGAAGGGATCCTT  
AGCTCCCTCTCCATCTTCACTCTGATGATATTTGATGAGTGCCACAACACTACGGGAAATCA  
CCCTTACAATGTGTTAATGAGTAGATACCTGGAACAAAAATTTGACTCTGCAAGCCAGCTG  
CCTCAGATTGTAGTTTAACTGCTTCTGTTGGAGTTGGTAATGCCAAGAGCACCAAGGAAA  
CGATAGAGCACATCTGTACCCTCTGCTCCTACCTTGACATACAGGCCATATCCACTGTCAG  
AGAGAACAAACAGGATCTGCAGAGATTTGCAAACAAGCCAGAAACACATGTCAGATGGGTT

AAAATGCGAGATCAGAATCACTTTGCAGACATTATCTCAGGTCTGATGTCTGAGACAGAGG  
CGTTGATGAGGAGGATTTACTCAGTGGACACTATCTCCCAAATCAACAAGAATGATTTTGG  
AACACAGAAATATGAACAGTGGATAGTTGCCACTCAGAAGAAATGCAGGCTGTTGCAACTG  
GCAGATAAGGAGAAGGAGAGCAGCATTGTAGACACCTTTTCATTTGCACTGAACACCTGC  
GGAAATTCAACGATGCTCTTATCATCAGTGAAGATGCCCGCATTGAAGATGCTTTAGCCTA  
CCTAACTGAATTTTTACAAATGTCAAAAATGGACCATATACAGAGTTAGAGAAGAACTGA  
CAGCCAAATTTCAAGAGAAAGAACCAGAACTGACTGCCCTTTCAAAGATGAGTCAAATGA  
GAATCCTAAGCTGGAAGAGCTTGCTTGCATCCTGGAGGAAGCATACCGCTATAACCCAGA  
CACTCACACTCTTCTCTTTGCTAAGACAAGAGCCTTAGTAGCTGCTTTGAAGAAGTGGATA  
GAAGCAAACCCTCTACTTAGCTACATAAAGCCAGGTGTGTTGATGGGTCGTGGAAGAAGA  
GATCAAAAACAGGTATGACCCTCCCAATGCAGAAGGGTGTGCTGGATGCATTCAAACCA  
ACAAAGAGAACAACTGCTAATTGCTACATCCGTTGCTGATGAAGGCATTGATATTTCTGAG  
TGCAACCTTGTTGTGCTCTATGAATACTTCGGTAATGTCACCAAATGATCCAAGTCAGAGG  
TCGTGGAAGGGCAAAGACAGCAAGTGCATCCTTGACAAAGCAAACAGAAAGTGGTTGA  
GAATGAGAAACACAACCGTTACAAGGAAGAAATGATGAATGAAGCTATTGAAAAGCTACAG  
AGTTGGGATGAAACAACATTTGCAAGAAAGATACATGACCTGCAAATGAAGGAAAAGGTAT  
TACGAGACTCCAGGAAGAAAGAAACAAGAAGTAAGGTAGTGAAGGGAAAAAAATCTTCT  
GTGTGGAATGCAAAGCATATGCCTGCAGTACAGATGACATcaGAGTTATAAAGGAATCTC  
ATCACACTGTCCTAGGAGATGCGTTCAAGGAGCGCTATATAACAAAGCCTCACCATAAACC  
AGTCCAGTTTGATTGTTTTGAGAAAAAAGCAAGATGTATTGCCAAATACTAATTGCCAGC  
ATGACTGGGGAATCATAGTGAAGTACAAGACATTTGATAATCTACCAGTGATCAAAATCAAA  
AGTTTTGTATTAGAGAATGTTGAACTGGGACACAAATGGATTTTCAGAAATGGAAAAATAT  
TAATTTTTCTTTGAAGAATTTTGATGTTGAAGAAACATCCAGCTGA

>cacatua\_leadbeateri-rig1

ATGACAGCGGAGGAGAAGAGGAACCTGCAATGCTACAGGCGGTACATCGAGAAGAGCCT  
GAACCCCGTTTACATCCTGAGCAACATGACGGCCTGGCTGTCGGACGAGGAGAAGGAGC  
GAGTCCGTAAGGAGGAGAAGGGGGTGACGGCGGCCGCCGCGCTGTTCTGGATACCATA  
CTGCTGCTGGACGCGGAGGGCTGGCTCCGGGGCTTCTGGATGCCCTGGTTGCAGCAGG  
TTACACTGGACTGGCAGAAGCAATTGAAAACCTGGGACTTCAGCAAGCTGGAAAACTGGA  
GCTGCACAGACAGCTGCTGAAGCAGATAGAAGCAACTATGCTAGAAGTTGATCCGGTAGC  
ACTCATGCCTTACATAAACATGTGCCTGATAGAAAGGGAGTGTGATGAGATCCTGCAGATT  
AGCGAATACAGAAGCAAAGCAGCTGGGATAACTAACTCATTGAATGTCTCTGTGATCGG  
ATAAGGAAAACCTGGCCAAAAAGCCTTCAGCTGGCACTGGATAACACAGGATATTACAATGC  
AAGTGAAGTGTGGGATATGAGAGAAGATAATGGCAAAGACGTTGATGGTGAAATGACAGAT  
GCCTTTAAGAACAGCTTTGAAACCACAATGATGTTTTCTGAAGAGGCAGAATGTGATAATAA  
TCTCAGTGAAAATCTCTATTCAGGTTTCAGAAGAGGTCTATCAGTCTTCACCTGTTTATGAAC  
CAAAGAAGGCTCGGAGCTACCAGACTGAACTTTCACAGCCTGCTATCAATGGGTATAACAC  
ATTGATATGTGCCCCACAGGATCTGGGAAAACTTTTGTGGCACTGATGATTTGTGAACAC  
CATTTCCAAAACATGCCCTCGGGACAAAAAGCAAAAGTTGTCTTTCTTGCAACCAAAGTGC  
CAGTGTATGAACAACAGAAAAACGTATTCAAGCAGCACTTTGAAAGAAGTGGATATTCTGTT  
CAAGGAATTAGTGGTGAACAGTTGCAAATGTCTCTGTAGAAAAGGTTATACAGGACAGCG  
ACATCATTGTGCTAACACCCCAGATTCTTGTGAATAGCATTGAGGAAGGGATCCTTAGCTC  
CCTCTCCATCTTCACTCTGATGATATTTGATGAGTGCCACAACACTGTGGGCAACCACCT  
TACAATGTGTTAATGACCAGATACCTGGAACAAAAATTTGACTCTTCTGTAAACCAGCTACC



TCAGATTGTAGGTTTAACTGCTTCTGTTGGAGTTGGTAATGCCAAGACCATCATGGAAACG  
ATAGAGTACATCTGTACTGTCTGCGCCAATCTTGACGTGCAGGCCATATCTACTGTCAGAG  
AGAACAAACAGGATCTGCAGAGATTTGGAAACAAGCCAGAAATACATGTCAGATGGGTGAA  
AATGAGAGCTCAGAATCATTTTGCAGACATTATCTCAGGCCTGATGTCTGAGACAGAGGTG  
TTGATGAGGAAGAATTACTCAGTGGATACTATCTCCCAGATCAACAAGAATGATTTTGGAAAC  
ACAGAAATATGAACAGTGGATAGTTGCCACTCAGAAGAAATGCAGACTATTGCAACTGGCA  
GATAAGGAGAAGGAGAGCATCATTTGTAGAAACCTTTTCATTTGCACTGAACACCTGCGGA  
AATTCAATGATGCTCTCATCATCAGTGAGGATGCCCCGATTGAAGATGCTTTAGCCTACCTA  
ACTGATTTTTTTCAGAAATGTCAGAAATGGACCATACACAGAGTTAGAGAAGCAACTTACAGC  
CAAATTTCAAGAGAAAGAACCAAAGCTGTCTGCCCTTTCAAAGATGACTCAAATGAGAATC  
CCAAGCTGGAAGAGCTTGCTTGCATCCTGGATGAAGCATACCACTATAACCCACAGACTCG  
CACTATTCTCTTTGCTAAGACAAGAGCTTTAGTAGCTGCTTTGAAGAAGTGGATAGAAGCAA  
ACCCTCTATTTAGCCACATAAAGCCAGGTATATTGATGGGTCATGGAAGAAGAGATCAAAA  
AACAGGTATGACTCTCCCAATGCAGAAGGGTGTACTGGATGCATTCAAACCAACAAAGAC  
ACCAGACTGCTAATTGCTACTTCTGTTGCTGATGAAGGCATTGATATTTCTGAGTGCAACCT  
TGTTGTGCTCTATGAATACTTCGGTAATGTCACCAAAATGATCCAAGTCAGAGGTCGTGGA  
AGGGCTAAAGACAGCAAGTGCATCCTCGTGACAAACAAAACAGAAGTGGTTGAGAAAGAG  
AAACACAACCGTTACAAGGAAGAAATGATGAATGAAGCTGTTGAAAAGCTACAGAATTGGG  
ATAAAAGAACATTTGCAAGAACGATACATGATTTGCAAATGAAGGAAAAGGTATTACGAGAT  
TCCAGGAAGAAGGAAATGCGATACAAGGTAGTGAAGGAAAAGAAAAATCTTCTGTGTGGAA  
AATGCAAAGCATTTGCCTGCAGTACAGATGATATCAGAATTATAAAGGAATCTTACCACACT  
GTCCTAGGAGACGCATTCAAGGAGCGGTATATAACAAAGCCTCACCATAAACCAATCCGGT  
TTGATTATTTTGAGAAAAAAGCAAGATGCATTGCCAAAATACTAACTGCCAGCATGACTGG  
GGAATCATAGTGAAGTACAGGACATTTGATAACCTACCAGTGATCAAATAAAAAGCTTTGT  
AGTAGAGAACATTGAAACTGGGACACAAATGGATTTTCAGAAATGGAAAGATCTTAATTTTT  
CTCTGAAGAATTTTGATGCTGAAGAACTGTTCAAGCTGA

>cairina\_moschata-rig1

ATGACGGCGGACGAGAAGCGGAGCCTGCAGTGCTACCGCCGCTACATCGAGCGGAGCCT  
CAACCCGGTCTACGTGCTGGGCAACATGACGGACTGGCTGCCCGACGAGCTGCGGGAGA  
GGATCCGCAAGGAGGAGGAGAGGGGGGTGAGCGGCGCCGCGCGCTCTTCCTGGACGC  
CGTGCTGCAGCTGGAGGCCAGGGGTGGTTCCGAGGGATGCTGGACGCGATGCTGGCC  
GCAGGTTACACAGGACTGGCAGAAGCAATTGAGAACTGGGACTTCAGCAAACCTGGAAAAA  
CTGGAGTTACACAGACAGCTGTTGAAGCGGATAGAGGCAACAATGTTAGAAGTTGACCCA  
GTAGCGCTCATTCCCTACATAAACACGTGCCTGATAGACAGGGAGTGCGAAGAGATTGAG  
CAGATTAGCGAAAACAGAAGCAAAGCAGCAGGCATAAACTAACTCATTGAATGTCTCTGTC  
GGTCGGATAAGGAGCACTGGCCAAAAAGCCTTCAGCTGGCACTAGATACCACAGGATATT  
ACCGTGCAAGTGAAGTGTGGGATATAAGAGAAGATAATGCCAAAGATGTTGACAGTGAAAT  
GACAGATGCCTCTGAGGACTGCCTTGAAGCCAGTATGACATATTCTGAAGAAGCAGAACCT  
GATGATAATCTCAGTGAAAATCTTGGTTCAGCAGCAGAAGGAATTGGCAAACCTCCACCTG  
TCTACGAAACAAAGAAGGCTCGGAGCTACCAGATTGAACTTGACAGCCTGCTATCAATGG  
GAAAAATGCCTTAATATGTGCCCTACTGGATCTGGAAAACTTTTCGTCTCAATTCTGATTT  
GCGAACACCATTTCCAAAACATGCCTGCAGGACGAAAGGCGAAAGTTGTCTTTCTTGCAAC  
TAAAGTCCCAGTGTATGAACAGCAGAAAAATGTCTTCAAGCATCATTTTGAAGACAAGGAT  
ATTCTGTTCAAGGAATTAGTGGTGAAAATTTTTCAAATGTCTCTGTAGAAAAAGTCATAGAG

GATAGTGACATCATCGTAGTGACACCCCAGATCCTGGTGAATAGCTTCGAGGACGGGACC  
CTTACCTCGCTCTCCATTTTCACTCTGATGATATTTGATGAGTGCCACAACACTACAGGCAA  
CCACCCTTACAATGTGTTAATGACCAGGTATCTGGAGCAGAAATTTAACTCTTCTGCAAGTC  
AGCTGCCACAGATTTTAGGTTTGACTGCTTCTGTTGGAGTTGGTAATGCCAAGAACATTGA  
GGAAACAATAGAGCACATCTGTAGTCTCTGCTCCTACCTCGACATACAGGCCATATCCACT  
GTCAGAGAGAACATACAAGAACTGCGAAGGTTGATGAACAAGCCAGAAATAGATGTCAGAT  
TGGTTAAGAGGCGAGTTCACAATCCCTTTGCAGTCATTATCTCAGATTTGATGTCCGAGAC  
AGAGGCACTGATGAGGACGATTTACTCAGTGGATACCATCTCCCAAACAGCAAGAAAGAT  
TTCGGAACACAGAACTATGAACACTGGATAGTTGTCACTCAGAGGAAATGCAGACTGCTGC  
AACTAGAAGACAAAGAGGAGGAGAGCAGGATATGTAGAGCCCTCTTCATTTGCACTGAACA  
CCTGCGGAAATACAATGATGCCCTCATCATCAGTGAAGATGCCCGCATCATAGATGCTTTA  
TCCTACCTGACTGAGTTTTTCACAAATGTCAAGAATGGACCATACACAGAATTAGAGCAGCA  
CCTGACGGCCAAATTTCAAGAGAAAGAACCAGAACTGATTGCCCTTTCAAAGACGAAACA  
AATGAGAATCCTAACTGGAAGAGCTTGCCTGCATCCTGGATGATGCGTACCGCTATAACC  
CACAGACTCGCACTCTTCTCTTTGCTAAGACAAGAGCCTTAGTATCTGCTTTGAAGAAGTGT  
ATGGAGGAAAACCCTATCCTTAGCTACATAAAGCCAGGTGTTTTGATGGGGCGCGGAAGA  
AGAGATCAAACAACAGGTATGACCCTCCCAAGCCAGAAGGGTGTGCTGGATGCGTTCAA  
ACCAGCAAGGACAACAGGCTGCTCATTGCTACATCTGTTGCTGATGAAGGCATTGATATTG  
TCCAGTGCAACCTTGTTGTGCTCTATGAATACTCTGGTAACGTGACCAAAATGATCCAAGTC  
AGAGGTCGTGGAAGGGCAGCAGGCAGCCAGTGCATCCTTGTGACAAGCAAAACAGAAGT  
GGTTGAGAATGAAAAATGCAACCGTTATAAGGAAGAAATGATGAATACAGCTGTGGAAAAG  
ATCCAGGAATGGGATGAAAAACATTTGCAAAAAAGATACATAATCTGCAAATGAAGGAAA  
GGGTGTTACGAGATTCCAGGAGGAAAGAAATAAAACCTAAAGTAGTGGAAGGCCAGAAGA  
ACCTCCTGTGTGGAAAATGCAAAGCATATGCCTGCAGTACAGATGACATCAGAATTATAAA  
GGACTCTCATCACATTGTCATAGGAGAAGCATTCAAGGAGCGTTACATAACAAAGCCTCAT  
AAGAAACCAATGCAGTTTGATGGTTTTGAGAAAAAAGCAAGATGTATTGCCGAAATAATAA  
TTGCCAGCATGATTGGGGAATCACAGTGAAGTACCTGACATTTGACAATCTACCAGTGATC  
AAAATCAAAAGCTTCGTAATGGAAAGTACTGCAACTGGAACACAAATGGACTTTTCAGAAATG  
GAAAAGCATTAAATCTTCTTTGAAGAATTTTGATGTTGAAGAAATGTCCAACCTGTACCCAC  
CATTTTAG

>calidris\_pugnax-rig1

ATGACGGCGGAGGAGAAGAGGAGCCTGCAGTGCTACCGGCGGTACATCGAGAAGAGCCT  
GAACCCCCTCTACCTCCTGAGCAACATGACGGAGTGGCTGTCGGACGAGCTGAAGGAGA  
GGATCCGTAAGGAAGAGGAGAAGGGGGTGACGGCGGCCGCCGCGCTGTTCTGGATGTC  
CTCCTGCAGCTGGAGGCGGTGGGATGGTTCCGGGGCTTCATCGACGCCCTGGCTGCAGC  
AGGTTACACGGGACTGGCAGAAGCCATTGAAAACCTGGGACTTCAGCAAACTGGAAAACT  
GGAGCTGCACAGGCAGCTGCTGAAGCGGATAGAAGCAACGATGCTAGAAGTTGATCCGGT  
GGCACTCATGCCCCACATAAACATGTGCCTGATAGAAAGGGAGTGTGATGAGATCCTGCA  
GATTAGCGAATACAGAAGCAAAACAGCTGGGATAACTAACTCATTGAATGCCTCTGTCGA  
TCGGATAAGGAAAACCTGGCCGAAAAGCCTTCAACTGGCCCTAGATTGCACAGGATATTATA  
ATGCAAGTGAACGTGTGGGATATGAGAGAAGATAATGGCAAAGATGTTGATGATGATATCAC  
AGATGCCTCTGAGAACAGCTTTGAAACCACCATGACATTTTCTGAAGAAGCAGAATGTGAT  
AACAATCTCAGTGAAAATCTCTGTTGAGCTGTAGGAGGGATCGAGCAGCCTTCACCTGTTT  
ATGAACCAAAGAAGGCTCGGAGCTACCAGATTGAACTTGCGCAGCCTGCTATCAGTGGGA

AAAACACAGTGATATGTGCCCCACAGGATCTGGAAAACTTTTGTGGCACTTCTGATTTGT  
GAACACCACTTGCAAAACATGCCTGCAGGACGGAAGGGGAAAGTTGTCTTTCTTGCAACTA  
AAGTGCCAGTGTATGAACAACAGAAAACGTATTCAAGCAGCACTTTGAAAGAAGGGGATA  
TTCTGTTCAAGGAATTAGTGGTGAACAGCTGCAAATGTCTCTGTAGAAAAGGTTATACAG  
GACAGTGACATCATTGTGCTGACACCTCAGATTCTTGTGAATAGCATCGAGGAAGGGATCC  
TTAGCTCCCTCTCCATCTTCACTCTGATGATATTTGATGAGTGCCACAACACTACGGGCAAC  
CACCTTACAATGTGTTAATGACCAGATACCTGGAACAAAAATTTGACTCCTCTGCAAACCA  
GCTGCCTCAGATTATAGGTTTAACTGCTTCTGTTGGAGTTGGTAATGCCAAGAACGTCAAG  
GAAACAATTGAGCACATCTGTACCCTCTGTTCCCTACCTCGACATACAGGCCATATCCACTG  
TCAGAGAGAACAAGAGGAACTGGAGAGATTGAGCAACAAGCCAGATACACATGTCAGAT  
GGGTAAAATGCGAGTTCAGAACTACTTTGCAGACATTATCTCAGGTCTGATGTCTGAGAC  
AGAAGTGTTGATGAGGAAGATTTACACAGTGGATACTATCTCCCAAATCAACAAGAATGATT  
TTGGAACACAGAGATATGAACACTGGATAGTTGCAACTCAGAAGAAATGCAGACTGTTGCA  
ACTGACAGATAAGGAGAAGGAGAGCAGCATTGTAGGGACCTTTTCATTTGCACCGAACAC  
CTGCGGAAATTCAATGATGCTCTCATCAGCGAAGATGCCCCGCTTGAAGATGCTTTAG  
CCTACCTCACTGAATTTTTACAAATGTCAAAAATGGACCGTATACAGAGTTAGAGAAGAAA  
CTGACAGCCAAATTTCAAGAGAAAGAACCAGAACTGACTGCCCTTTCAAAAGACGAATCAA  
ATGAGAATCCCAAGCTGGAAGAGCTTGCTTGCTATCCTGGATGAAGCATAACCGCTATAACCC  
TGAGACTCGCACTCTTCTCTTTGCTAAGACAAGAGCCTTAGTAGCTGCTTTGAAGAAGTGG  
GTAGAAGTAAACCCTCTACTTAGCCACATAAAGCCGGATGTGTTGATGGGTCGTGGAAGGA  
GAGATCAAAAAACAAGTATGACCCTCCCAATGCAGAAGGGGATACTGGATGCATTCAAAAC  
CGACAAGGACAGCAGACTGCTAATTGCTACATCTGTTGCTGACGAAGGCATTGATATTTCT  
GCATGCAATCTTGTTGTGCTCTATGAATACTTTGGTAACGTACCAAAAATGATCCAAGTCAG  
AGGTGCTGGAAGGGCAAGAGACAGCAAGTGCATCCTTGTCAAGCAAAACAGAAGTGGT  
TGAGAATGAGAAACACAACCGTTATAAGGAAGAAATGATGAATGAGGCTCTTGAGAAGCTA  
CAGAATTGGGATGAAGCAACATTTGTAAGAAAGATACATGACTTGCAAATGAAGGAAAAGG  
TATTACGAGATTCCAGGAAGAAGGAAGCAAGACCTGAGGTAGTGAAAGGGAAAAAAATCT  
TCTGTGTGGAATGCAAAGCATATGCCTGCAGTACAGATGACATCAGAATTATAAAGGAA  
TCACATCACACTGTCCTAGGAGACGCGTTCAAGGCGCGCTACATAACAAAGCCTCACCACA  
AAGCAATCCGCTTTGATTGTTTTGAGAAAAAATGCAAGATGCATTGCCAAAATGCTAGTTGC  
CAGCATGACTGGGGAATCACAGTGAAGTACAAGACATTTGATAATCTACCAGTGATCAAAA  
TCAAAAGCTTTGTAGTAGAGGATGTTGAACTGGGACACAAATGGACTTTTCAGAAATGGAA  
AAATATTAATTTTTCTTTGAAGAATTTTGATGAAGAAACATACAGCTGA

>calonectris\_borealis-rig1

ATGACCGCGGAGGAGAAGAGGAGCCTGCAGTGCTACAGGCGGTACATCGAGAAGAGCCT  
GAACCCCGTCTACATCCTGGGCAACATGACGGTCTGGCTGGCCGACGACGTGCAGGAGA  
GGGTCCGGAAGGAGGAGGAGAAGGGGGTGACGGCGGCCGCCGCGCTGTTTCTGGATGC  
CATCCTGCAGCTGGAGGCGGAAGGCTGGCTCCGGGGCTTCCTGGACGCCCTGGTTGCAG  
CAGGTTACACTGGACTGGCAGAAGCAATTGAAAACCTGGGACTTCAGCAAACCTGGAAAACT  
GGAGTTGCACAGAGAGCTGTTGAGGCGGATAGAAGCAACAATGCTAGAAGTTGATCCGGT  
AGCACTCATGCCCTACATAAACACATGCCTGATAGAAAGGGAATGTGATGAGATCCTGCAG  
ATCAGCGAATACAGAAGCAAAGCAGCCGGGATAACTAACTCATTGAATGTCTCTGTGCGAT  
CGGATAAGGAACACTGGCCAAAAAGCCTTAAGCTGGCACTAGATAATACAGGATATTACAA  
TGCAAGTGAACGTGTGGGATATGAGAGAAGATAATGGCAAAGATGTTGATGGTGAAATGACA

GATGCCTCTGAGAACAGCTTTGAAACCATGATGACGTTTTCTGAAGAAGCAGAATGTGATA  
ATAATCTCAGTGAAAATCTCTGTTTCAGCTTCAGAAGTGATCTATGAGTCTTCACCTGTTTAT  
GAACCAAAGAAAGCTCGGAGCTACCAGATCGAACTTGCGCAGCCTGCTATCAATGGGAAA  
AACACATTGATATGTGCACCCACAGGATCTGGAAAAACCTTTGTGGCACTCCTGGTTTGTG  
AACACCATTTCCAAAACATGCCTGCAGGACGAAAGGCGAAAGTTGTCTTTCTTGCAACTAA  
AGTGCCAGTGTACGAACAACAGACAACCTGTATTCAAGCAGCATTTTGAAGAATTGGATAC  
TCTGTTCAAGGAATTAGTGGTGAAACAGTTGCAAATGTCTCTGTAGAAAAGGTTATTCAGGA  
CAGTGACATCATTGTGCTGACGCCCCAGATTCTTGTAATAGCATCGAGGAAGGGGTCCTT  
AGCTCCTTCTCCATCTTCACTCTGATGATATTTGATGAGTGCCACAACACTACAGGCAAGCA  
TCCTTACAATGTGTTAATGACCCGATACCTGGAACAAAAATTTGACTCCTCTGCAAACCAGC  
TGCCTCAGATTGTAGGTTTAACTGCTTCTGTTGGAGTTGGTAATGCCAAGACCACCAAGGA  
AGCAATAGAGCACATCTGTACCCTCTGCTCCTACCTTGACATACAGGCCATATCCTCTGTC  
AGAGAGAACAAACAGGATCTGCAGAGATTTGGAAACAAGCCAGAAACATATGTCAGATGTG  
TTAAATGCGAGTTCAGAACCCTTTGCAGACGTTATCTCAGGTCTGATGTCTGAGACAGA  
GGCATTGATGAGGAAGATTTACTCAGTGGATACTACCTCTCAAATCAACAAGAATGATTTTG  
GAACACAGAAATATGAACACTGGATAGTTGCCACTCAGAAGAAATGCAGACTGTTGCAACT  
GCCAGATAAGGAGAAGGAGAGCAGCATTTGTAAAGACCTTTTCATTTGCACTGAACACCTG  
CGGAAATTCACGATGCTCTCATCATCAGTGAAGACGCCCGCATCAAAGATGCTTTAGCCT  
ACCTAACTGAATTTTTACAAATGTCAAAAATGGACCATATACAGAGTTAGAGAAGAACTG  
ACAGCCAGATTTCAAGAGAAAGAACCAGAACTGACTGCCCTTTCAAAGATGAATCAAATG  
ACAATCCCAAGCTGGAAGAGCTTGCTTGCATCTTGATGAAGCATACCGCTATAACCCACA  
GACTCGCACTCTTCTCTTCGCTAAGACAAGAGCCTTAGTAGCTGCTTTGAAGAAGTGGATA  
GAAGGAAACCCTCTACTTAACCACATAAAGCCAGGTGTGTTGATGGGTCGTGGAAGAAGA  
GATCAGAAGACAGGTATGACCCTCCCAATGCAGAAGGGTGTACTGGATGCATTCAAACCA  
ACAAAGAAAGCAGACTGCTAATTGTTACATCTGTTGCTGACGAAGGCATCGATATTTCTGA  
GTGCAACCTTGTTGTGCTCTATGAATACTTCGGTAATGTCACCAAAATGATCCAAGTCAGAG  
GTCGTGGAAGGGCAAGAGATAGCAAGTGCATCCTTGTAAGCAGCAAAACAGAAGTGGTTG  
AGAATGAGAACTCAACTGTTATAAGGAAGAAATGATGAACGAAGCTATTGAAAAGCTACA  
GAATTGGGGTGAAACAACGTTTGCAAAAAAGATACATGATCTGCAAATGAAGGAAAAGGTA  
TTACGAGATTCCAGGAAGAAAGAAACAAACCTAAGGTAGTGGAAGGGGAAAAAATCTTC  
TGTGTGGAATGCAAAGCATATGCCTGCAGTACAGATGACATCAGAGTTATAAAGGAATG  
TCATCACGTTGTCCTAGGAGATGCGTTCAAGGAGCGTTACATAACAAAGCCTCACGAGAAA  
CCAGGCCTGTTTGATTGTTTTGAGAAAAAAGCAAGATGCATTGCCAAATACTAATTGCCA  
GCATGACTGGGGAATCATAGTGAAGTACAAGACATTTGATAATCTACCAGTGATCAAAATCA  
AAAGCTTTGTAGTAGAGAACATTGAACTGGGACACAAATGGATTTTAAGAAATGAAAAAT  
ATTAATTTTTCTTTGAAGAATTTTGTGTTGAAGAAACGTCCAGAACTGA

>calypte\_anna-rig1

ATGACGGTGGAGGAGAAGCGGAGCCTGGCGTGCTACCGCCGGTACCTCGAGAGGACCCT  
CAACCCCGTCTACCTCCTCAGCAACATGTCGCCgTGGCTCTCCGACGAGGTGCGGGAGCA  
GGTGCAGCGGGCGGAGGAGCGGGGGGTGACGGCGGCCGCCGCGCTCTTCTGGACGC  
CGTCTGCAGCAGGAAGCCCAGGGCTGGCTGCGGGGGCTGCTCGACGCCCTTCAGGCC  
GCAGGTTACACTGGGCTGGCAGAAGCAATTGAAAATGGGACTTCAGCAAATGGAGAAG  
CTGGAGTTGCATCGACAGCTGTTGAAGAGGATAGAAGCCACAATGCTTGAGGTTGATCCA  
GTAGCTATCATGCCCTATATCAACACCTGCCTAATAGAAAGGGAGTGTGATGAGaTCcTGCA

GATTAGTGAAAACAGAAGCAAAGCAGCTGGGATAACAAAACATCATCGAGTGTCTCTGTGCGA  
TCGGATAAGGAAAACCTGGCCAAAATGCCTTCAGCTGGGACTGGATAATGCTGGGTATTACA  
ACGCAAGTGAACCTGTGGGATGTGAGAGAAGATAATGCCAAAGATTTTGATGGAGAAGTGG  
CAGATGCCTCTGAGAACATATTTGAAACCACAATAACATTTTCTGAAGAAGCAGAATGTGAT  
AATAAGCTTAGTCAAATCCTGGTTCAGCTTCAGGGACTGGTCAGCCTTCATATGCTTATGA  
ACCAAAGAGGGCTCGGAGCTACCAGACAGAACTTGACAGCCTGCTATCAGTGGGAAGAA  
CACACTGATCTGTGCTCCACAGGGTCTGGCAAAACATTTGTGGCACTTCTGATTTGTGAA  
CATCACTTCCAAAACATGCCTGCAGGGCAGAAGGCGAAAAGTTGTCTTTCTTGCAACCAAAG  
TGCCAGTGTATGAACAACAGAAGAATGTGTTCAAGCAGCATTTTGAAAGAAGTGGATACTC  
TGTTCAAGGAATGAGTGGTGAACGGTTGCAAATGTCTGTGTAAAAAAGGTTATAGAGGAC  
AGTGACATCATTGTGCTGACGCCCCAGACTCTTCTGAATATCATGGAGGAAGGGACCTTCA  
GTTCCCTCTCTATCTTCACCCTGATGATATTTGATGAGTGTCAACAACACTACGGGCAACCAC  
CCTTACAATGTGTTAATGGCCAGGTATCTTGAAGACAAATTCAACTCCTCTGCCAAGCAGCT  
ACCCCAGATCATAGGTTTAAACAGCTTCTGTTGGAGTTGGTAATGCCAAGAGCGTCAAGGAG  
GCAATAGAGCACATCTGTGTCCTCTGCTCCTACCTTGACATACAGGCCATATCCACTGTCA  
GAGAGAACAAAGATGAGCTGCAGAGACTCCAAAACAAGCCAGAAACACATATCAGACTGG  
TTAAGATGCGGGTTTCAAGATCGCTTTGCAGACATTGTCTCTGGTCTGATGTGTGAGACAGA  
GGCACTGATCAGAAGGATTTACTCAGTGGATACTATCTCTCAAATCAGCAGGAGTGACTTT  
GGGACACAGAGATATGAACACTGGATAATTGCCACTCAGAAAAGATGCAGGCTGTTGCAG  
CTGGCAGATAAGGAGAAGGAGAGCAGCATTGTAGACACCTTTTCATTTGCACGGAACACC  
TGCGGAAATACAATGATGCTCTCATCATCAGTGAAGATGCACGCATTGAAGATGCTTTAGC  
CTACTTAAATGAGTTTTTTCACAAATGTGAAAAACGGACCATACACAGAGATAGAGAAACAAC  
TGACGAACAAATTTCAAGAGAAAGAACCAGAACTGACAGCCCTCTCAAAGATGAATCCAA  
TGATAATCCCAAGCTGGAAGAGCTTGCTGCCATCCTGGATGAAGCATACCGCTACAATCCA  
CAGACTCGCACACTTCTCTTTGCTAAAACAAGAGCCTTAGTAGCTGCTTTGAAGAAGTGGG  
TGGATGCAACCCTCTACTGAGCTACATAAAATCAGATGTGTTGATGGGTCGTGGACGAAG  
AGATGAAAAAAAATGTATGACCCTCCCAATGCAGAAGGTTGTACTGGATACATTCAAACCA  
ACAAAGATTGCAGATTGCTCATTACTACATCTGTTGCTGATGAAGGCATAGATATTTCTGAG  
TGCAACCTTGTGGTGCTCTATGAATACTTTGGGAATGTCACCAAAATGATCCAAGTCAGAG  
GTCGTGGAAGGGCAAGAGGCAGCAAGTGCATCCTTGTAAACAAGCAAAACAGAAGTGGTTG  
AGAATGAGAAAATGAACCATTTTAGGGAAGAAATGATGAATGAAGCTATTGAAAAGCTGCA  
GAATTGGAGTGAAGCAGTATTTGCAAAAAAGATACATGACCTGCAAATGAAGGAAAAGGTA  
TTACGAGATTCCAGGAAGAGAGAAACGAGACCTAAGGTAGTGGAAGGGAAAAAAAATCTTC  
TGTGTGGAAAATGCAAAGCATATGCCTGCAGTACAGATGACATCAGAGTTATAAAGGAATC  
TCATCACATTGTCTTGGAGATGACTTCAAGGAGCGTTACATGACAAAGCCACACAAGAAA  
CCAATGCAGTTTGTCTCTTTGAGAAAAAAGCAAGATGCATTGTCAAACACCAGCTGCC  
AGCACGACTGGGGAATCATAGTGAGGTACAAGATGTTTGATGATCTACCAGTGATCAAAAT  
CAAAAGCTTTGTTGTAGAGGATGTTAAACTGGGACACAAATAGATTTTCAGAAATGGAGA  
GATATTAATTTTTCTTTGAAGAATTTTGATGATGAAGAAATGTCCAGATGA

>camarhynchus\_parvulus-rig1

ATGACGGCGGAGGAGAAGCAGAACCTGCGGTGCTACAGGCATTACATCGAGAGGAGCCT  
GAACCCCGTATACATCCTCAGCAACATGACGGAATGGCTGTCCGACGAGGTGAAGGAGAG  
AATCCGAAAGGAGGAGGAGAAGGGCGTGACGGCGGCCGCGCTGTTCTGGATGCC  
GTGCTGCAGCTGGAGGCGGAGGGCTGGCTCCGGGGCTTTCTGGATGCCCTGGTTGCAGC

AGGTTACACTGGACTGGCAGAAGCAATTGAAAACCTGGGACTTCAGCAAACCTGGAAAACTG  
GAGCTGCACAGGCAGCTGTTGAAGCGGATAGAAGCCACAATGCTAGAAATTGATCCTGTA  
GAAATCATGCCATACATAAACATATGCCTGATAGACAGGGAGTGTGATGAGATCATGCAGA  
TCAGTGAATACAGAAGCAAGGCAGCCGGGATAACGAAACTCATTGAATGCCTCTGTGCTC  
GGATAAGGAAAACTGGCCCAAAAGTCTTCAGCTGGCATTGGATAATACAGGATATTACAAT  
GCAAGTGAACGTGTGGAATATAAGAGAAGATAACGGCAAAGACATTGATGGTGAAATGACAG  
ATGCCTCTGAGAATTACTTTGAAACCATGATGACATTTTCTGAAGAAGCAGAATGTGATAAT  
CTGAGCAAAAATCTCTCTTCAGTTTCAGAAAGCATCTCTGAGTCTTCATCTGTTTATGAACC  
AAAGAAGGCTCGGAGCTACCAGATTGAGCTTGCACAGCCTGCTTTTAATGGGAAAAACACA  
TTGATTTGTGCCCCCACAGGCACTGGAAAACTTTTGTGGCACTTATGATTTGTGAACATCA  
CTTACAAAATGTTCCCTCAGGACGAAAGGCAAAAGTTGTCTTCCTTGCAACCAAAGTGCCA  
GTGTATGAGCAACAGAAAAACGTATTCAGGCAGCATTTCGAAAGAAGTGATATTCTGTTCA  
AGGAATTTGTGGTGAAACAGTTGCAAATATCTCTGTAGAAAATGTTATACAGGACAGTGACA  
TCATTGTGCTAACGCCCCAGATTCTTGTGAATAGCATGGAGAAAGGTATCCTTAGCTCCCT  
CTCCATCTTCACTCTGATGATATTTGATGAGTGCCACAACACTACAGGTAACCACTTACA  
ATGTGTTGATGACCAGATACCTGGATCAAAAATTTGACTCCTCTGCAAACCAGCTGCCTCA  
GATTGTAGGTTTAACTGCTTCTGTTGGAGTTGGTAATGCCAAGAGCACTGATGAACTGTA  
GAGCACATCTGTACCCTCTGCTCCTACCTTGACATACAGGCCATATCCACTGTCAGAGAGA  
ACAAAGAAGATCTGCAGAGGTTTGGAAACAAGCCAGAAAGCGCATATCAGATGGGTAAAT  
GCGAGCTCAGAATCACTTTGCAGACATTATCTCTGGTCTGATGTCTGAGACAGAAGTGTTG  
ATGAGGAAGATTTACTCAGTGGATTCCATCTCCCAAATCAACAAGAATTACTTTGGAACACA  
GAGATATGAACAGTGGATAGTTTATACTCAGAAGAGATGCAGACTATTGCAACTGGAAGAT  
AAGGAGAAGGAGAGCAGTATTTGTAGAGACCTTTTCATTTGACTGAACACTTGCGGAAAT  
TCAATGATGCTCTCATTATCAGTGAAGATGCCCGCATCGAAGATGCTTTAGCCTACCTAAAT  
GAATTTTTTACAAATGTAAAAAATGGACCATTTACAGAGTTAGAGAAGCAGCTGACGGAGA  
AATTTCAAGAGAAAGAACAAGAGCTGACTGCCCTTTCAAAGATGAGTCAAATGAGAATCC  
AAAGTTGGAAGAGCTTGCTTGATCCTGGATGAAGCATACCACTATAACCCAGAGACTCGC  
ACTATTCTCTTTGCCAAGACAAGAGCCTTAGTAGCTGCTTTGAAGAAGTGATAGAAGGAA  
ACCTCTTCTTAGCCACATAAAGCCAGATGTGTTGATGGGTAAAGGAAGAAGAGATCAGAA  
AACAGGTATGACCTTGCCAATGCAGAAGGGTGTACTGGATGCGTTTCAGAAATGACAAAGAC  
ATCAGACTGCTAATTGCTACATCTGTTGCTGACGAAGGCATTGATATTACTGAGTGCAACCT  
TGTGGTGCTCTATGAATACTTCGGAAATGTCACCAAAATGATCCAAGTCAGAGGTCGTGGA  
AGGGCAAGAGACAGCAAGTGCATCCTTGTGACAAGCAAAACAGAAGTGTTGAGAATGAA  
AAACGAAACCGTTACAAGGAAGAAATGATGAATGCAGCTATTGAAAAGCTACAGAACTGGG  
ATGAAACAACATTTGTGAGAAAGATACGTAGCCTGCAAATGAAGGAAAAGATGCTACGAGA  
TTCCAGGAAGAACAAAACAAAACAAGAAATAGTAGAAGGGGAAAAAAAATCTTTTGTGTGGAA  
AATGCAAGGCATATGTGTGCAGTACAGATGATATCAGAATTATAAAGGAATCTCATCACACT  
GTCTTAGGTGATGCATTCAAGGAGCGTTATACAACAAAGCCCCACAGGAAACCTTTTCAGT  
TTGATGGTTTTTCAGAAAAAAGCAAGATGCATTGCCGAAATACTGAGTGTGAGCATGACTG  
GGGGATCAGAGTGAAGTACAAGATATTTGATAATCTACCAGTGATCAAAATCAGAAGCTTTG  
TACTAGAGGATGTTGAAACAGGGACACAAATGGATTTTCAGAAATGGAAAAGTATTAATTTG  
TCTTTGAAAGAGTTTGATGAAGAAACATCCAGCTGA

>casuarius\_casuarius-rig1

ATGACGGCGGAGGAGAAGCGCGGCCTGCAGTGCTACCGGCGGCTCATCGAGAGCACCCCT

GAACCCCGTGTACATCCTGGGCAACATGACGGACTGGCTGGCGGACGTGGTCAGAGAGA  
GGATTCGGAAGGAGGAGGAGAAGGGGGTGACGGCGGCCGCCGCGCTGTTCCCTCGACGT  
CATCCTGCAGCTCGAGGCCCGGGGCTGGTTCAGGGGCTTCCTCAACGCGCTGGTGGCAG  
CAGGTTACACTGGGCTGGCAGAAGCAATTGAAAACTGGGACTTCAGAAAACTGGAAAACT  
GGAGTTACACAGACAGCTGCTGAAGCGGATAGAAGCGACAATGATAGAAATTGATCCAGTA  
GTGCTGATCCCCTACATAAACACATGCCTGATAGACAGGGAGTGTGATGAGATTCTGCAGA  
TTAGCGAACACAGGAGCAAACCAGCAGGCATAACTAACTCATTGAATGTCTCTGTGATC  
AGATAAGGAAAACTGGCCCAAAAGCCTACAGCTAGCACTAGATAATACAGGATATTACCGT  
GCAAGTGAAGTATGGGATATGACAGAAGATAATGGCAAAGATGCTGATAGTGAAATGATGG  
AGACTTCTGAGGACAGCTTTGAACTAGTATAACGTATTCTGAAGAAGGAGAATGTGATAAT  
AATCTCAGTGAAAATCTCTGTTGAGCTGCAGAAGTGATTGACCAGTCTCCACCTATTTATGA  
ACCAAAGAAGCCTCGAAGTTACCAGACTGAGCTTGCACAGCCTGCTATCAAGGGGAAAAAT  
ACAATAATATGTGCCCTACTGGCTCTGGGAAAACCTTTGTGGCGCTTCTGATTTGTGAAC  
ACCATCTCCAAAACGTGCCTGCAGGACGAAAGGGAAAGGTTGTCTTTCTAGCAACTAAAGT  
CCCAGTGTATGAGCAACAAAAAACTGTTTTCAAGCAGCATTTTTGAAAGAAGTGGATACTCC  
GTTGAAGGAATTAGTGGTGAAACCGTTGCGCGTGTCTCTGTAGCAAAGGTTATACAGGACA  
GTGACATCATCATACTGACCCCCCAGATCCTCGTGAATAGCTTTCAGGACGGGACCCTGA  
GCTCCCTCTCTGTTTTCACTCTGATGATATTTGATGAGTGCCACAACACCACGGGCAACCA  
CCCTTACAACGTGTTAATGACTAAATATCTGGAACAAAAATTTGACTCCTCTGCACATCAGC  
TGCCTCAGATTATAGGTTTAACTGCCTCCGTTGGAGTTGGTAGCGCCAAAAAACTGAAGA  
GGTGATAGAGCATATCTGTACGCTGTGCTCCTACCTGGACATACAGACCATATCCACCGTC  
AGAGAGAATGTACAGGATCTGCAGAGCATCGTATACAAACCCGAAATAGATGTCAGACAGG  
TTAAATGCGACTTCAAAATCATTTTGTGAACATTATCTCAGGTTTGATGGCTGAGATAGAG  
GCACTGATGAGAACGATTTACTCAGTGGACACTGTCTCCCAGGTTACTTGGAATGATTTTG  
GAACACAGAAATATGAACACTGGATAGTTAAAACTCAGAAGAAATGCAAACCTGTTGCAACTA  
GCTGATAAGGAGGAGGAGAGCAGGATTTGTAGAGCCCTTTTCATTTGCACTGAACACCTGA  
GGAAATTCAATGATGCCCTCATCATCTGTGAAGATGCCCGCATCCAAGATGCTTTAGCCTA  
CCTAACAGAATTTTTACAAATGTCAAAAATGGACCATTACAGAGCTAGAGCAGTGCCTG  
ACAGCCAAATTTCAAGATAAAGAAAAAGCAGCTGATTGACCTTTCAAAAGACGAATCAAACGA  
GAATCCTAACTGGAAGAGCTTGCCAGCATCTTGGATGAAGCATACCGCTATAACCCACAG  
ACCCGCACTCTTCTCTTTGCTAAGACAAGAGCCTTAGTTGCTGCTTTGAAGAAGTGGGTAG  
AAGAAAATCCTCTACTTAGTAGCCACATAAAGCCAGATGTTTTGATGGGGCGTGGAAGAAA  
CAATCAAAAAACAGGTATGACCCTCCCAAGTCAGAAGGGCGTATTGGATGCTTTCAAAACC  
AATAAGGACAGCAAGCTGCTAATTGCTACATCTGTTGCTGATGAAGGCATTGATATTGCCC  
AATGCAACCTTGTTGTGCTCTATGAATACTATGGCAATGTCATCAAAATGATCCAAGTCAGA  
GGTCGTGGAAGGGCAAGAGACAGCAAGTGCATCCTTGTGACAAGCAAAAGAGAAGTCGTT  
GAGAATGAGAAATACAACCGTTACAAGGAAGAAATGATGAATGAAGCTATTGAAAAGCTCC  
AGACATGGGATGAGGCAACATTTACAAGAAAGATATATAACCTGCAAATGAAGGAAAAGGT  
ATTACGAGATTCCAAGAAGAAAGATACAAGACCAAAGGTAGTGGAAGGCAAAAAAATCTC  
CTGTGTGGAATGCAAATCATATGCTTGCAATACAGATGACATCAGAGTTATAAAGGAATC  
TCATCACACCATTCTTAGAGAAGCATTCAAGGAGCGTTACATAACAAAGCCTCATAAGAAAC  
CAGTCCAGTTTGATGATTTTATGAAAAAAGCAAGATGTATTGCAAGAATACTACTTGCCAG  
CATGACTGGGGAATCATAGTGAAGTACAAGACGTTTGATAACCTACCAGTGATCAAAATCA  
AAAGCTTTGTAGTGGAGGATGTTGCAACTGGGACTCAAATGGATTTTCAGAAATGGAGCAA

TGTTAATTATTCTTTCAAATTTTTGATGTTGAAGAAATGTCCAGCTGA

>catharus\_ustulatus-rig1

ATGACGGCGGAGGAGAAGCAGAGCCTGCGGTGCTACCGGCGGTACATCGAGAGGAGCCT  
GAACCCCGTGACGTCCTCAGCAACATGACGGAAGTGGCTGTCCGACGAGGTGAAGGAGA  
GGGTCCGCAAGGAGGAGGAGCGGGGGGTGACGGCGGCCGCCGCGCTGTTCTTGATGC  
CGTGCTGCTGCTGGAGGCGGAGGGCTGGCTCCGCGGATTCTTGACGCCCTGGTCGCTG  
CAGGTTACACTGGACTGGCAGAAGCAATTGAAAAGTGGGACTTCAGCAAGCTTGAAAAGT  
AGAGCTGCACAGGCAGCTGTTGAAGCGGATAGAAGCAACAATGCTAGAAGTTGATCCTGT  
AGCAATCATGCCATACATAAACACATGCCTGATAGAGAGGGATTGTGATGAGATCCTGCAG  
ATCAGTGAATACAGAAGCAAGGCAGCGGGGATAACCAAAGTCAATTGAATGCCTCTGTGCT  
CGGATAAGGAAAAGTGGCCCAAAAGTCTTCAGCTGGCACTGGATAATGCAGGATATTATAA  
TGCAAGTGAAGTGTGGAATATAAAGAAGATAATGGCAAAGATGTGGATGGTGAAGTGAACA  
GATACTTCTGAGAATTACTTTGAAACCGTGATGACATTTTCTGAAGAAACAGAATGTGATAA  
TCTCAGCGAAAATCTCTCTTCAGTTTCAGAAAAGTGCCAATGAATCTTCATCTGTTTATACAC  
CAAAGAAGGCTCGGAGCTACCAGATTGAGCTTGACACAACCTGCTATTGATGGGAAAAACAC  
TTTGATTTGTGCCCCACAGGATCTGGAAAAACCTTTGTGGCACTTCTGATTTGTGAACATC  
ATTTGCAAAACGTTCCCTCAGGACAAAAGGCAAAAATTGTCTTCCTTGCAACCAAAGTGCC  
AGTGTATGAGCAACAGAAAAATGTATTCAGGCAGCATTTTGAAGAAGTGGATACTCTGTTT  
AAGGAATTTGTGGTGAAACAGTTGCAAGTATCTCTGTAGAAAGCGTTATAAGGGACAGTGA  
CATCATTGTGCTAACTCCCCAGATTCTTGTAACAGCATGGAGAAGGGGATCCTTAGCTCC  
CTCTCCATCTTCACTCTGATGATATTTGATGAGTGCCACAACACCACAGGCAACCACCCTTA  
CAATGTGCTGATGACCAGATACCTGGACCAAAAATTTGACTCCTCGGCAAACGAGCTGCCT  
CAGATTGTAGGTTTAACTGCTTCTGTTGGAGTTGGTAATGCCAAGAGCACTGATGAACTAT  
AGAGCACATCTGTACCCTCTGCTCCTACCTTGACATACAGGCCATATCCACTGTCAGAAAG  
AACAAAGAAGATCTGCAGAGGTTTGGAAACAAGCCTGAAACACATATCAGATGGGTAAAA  
TGCGAGCTCAGAATCACTTTGCAGACATTATCTCAGGTCTGATGTCTGAGACAGAGGTGTT  
GATGAGGAAGATTTACTCAGTGGATACCATCCCCAAATCAACAAGAATTACTTTGGAACA  
CAGAGATATGAACAATGGATAGTTTCCACTCAGAAGAAGTGCAGGCTGTTGCAACTGGAAG  
ATAAGGAGAAGGAGAGCAGTATTTGTAGAGACCTTTTCATTTGTAAGTGAACACTTGCGGAA  
ATTCAACGACGCTCTGATTATCAGTGAAGATGCCCGCATCGAAGATGCTTTAGCCTACCTA  
AATGAATTTTTCACAAATGTGAAAAATGGACCTTTTACAGAGTTAGAGAAGCAACTAACGCA  
GAAATTTCAAGAGAAAGAACTAGAGCTGACTGCGCTTTCAAAGATGAGTCAAATGAGAAT  
CCAAAGTTGGAAGAACTTGCTTGCATCCTGGACGAAGCATACCGCTATAACCCGGAGACTC  
GCACTATTCTCTTTGCCAAGACAAGAGCCTTAGTAGCTGCTTTGAAGAAGTGGATAGAGGC  
AAACCCTGTACTTAGCCACATAAAGCCAGATGTGTTGATGGGTAGAGCAAGAAGAGACTAT  
AAAACAGGTATGACCCTGCCAATGCAGAAGGGTGTACTGGACGCATTGAGAAATGACAAA  
GACATCAGACTGCTGATTGCTACATCTGTTGCTGATGAAGGCATTGATATTACTGAGTGCA  
ACCTTGTGGTGCTTTATGAATACTTCGGTAATGTCACCAAAATGATCCAAGTCAGAGGTGCT  
GGAAGGGCAAGAGGCAGCAAGTGCATCCTTGTGACAAGCAAAAGTGAAGTGGTTGAGAAT  
GAAAAGTAACTGTTACAAGGAAGAAATGATGAATGCAGCTATTGAAGAGCTACAGAACT  
GGGATGAAACAACATTTGCAAGAACGGTATGTCGCCTGCAAAAGAGGGACAAGGTACTAC  
GAGATTCCAGGAAGAACGAAACAAAATGTGAAGTAGTGAAAGGGAAAAAAATCTTTTGTG  
TGGAAGTGCAGAGTGTATGTGTGAGTACAGACGACATCAGAATTATAAAGGAATCTCAT  
CACACTGTCCTGGGTGACACGTTCAAGGAGCGTTACATAACAAAGCCCCACAGGAACCA



GTAAAGTTTGTATGATTTTCTGAAAAAGGCAAGATGCATTGCCAAAATGCTGAGTGCCAGC  
ATGACTGGGGGATCACAGTGAAGTACAAGACATTGATAATCTACCAGTGATCAAAATCAA  
AAGCTTTGTACTAGAGGACGTTGAAACTGGGACACAAATGGAGTTTCAGAAATGGAAAAGT  
ATTAATTTGTCTTTGAAGAATTTTGTATGAAGAAGCATTTCAGCTGA

>charadrius\_alexandrinus-rig1

ATGACGGCGGAGGAGAAGAGGAGCCTGCAGTGCTACAGGCGGTACATCGAGAAGATCCT  
GAACCCTGTCTACATCCTGAGCAACATGACGGAGTGGTTGTCCGACGAGGTGGAGGAGAA  
AATCCGGAAGGAAGAGGAGAAGGGGGTGACGGCGGCCGCCGCTGTTTCTGGATGCCA  
TCCTGCAGCTGGAGGTGGAGGGATGGTTCCGGGGCTTCCTGGACGCCCTGGGTGCAGCA  
GGTTACAGTGGACTGGCAGAAGCAATTGAAAAGTGGGACTTCAGCAAAGTGGAAAACTG  
GAGTTGCACAGACAGCTGTTGAAGCGGATAGAAGCAACAATGCTAGAAATTGATCCGGTA  
GAGCTCATGCCCTACATAAACACATGCCTGATAGAAAGGGAGTGTGACGAGATCCTGCAG  
ATTAGCGAATACAGAAGCAAAACAGCCGGGATAACTAACTCATTGAATGTCTCTGTCTGAT  
CGGATAAGGAAAAGTGGCCGAAAAGCCTTCACTGGCACTAGATAACACAGGATATTACAA  
TGCAAGTGATCTGTGGGGTATGAGAGAAGACAATGGCAAAGATGTTGATGGTGAAATCACA  
GATGCCTCTGAGAACAGCTTTGAAACGATGACATTTTCTGAAGAAGCAGAATGTGATAATCT  
CAGTGAAAATCTCTGTTCAGCTTTAGAAGGGACCCATCAGTCTTTACCTGTTTATGAACCA  
AGAAGGCTCGGAGCTACCAGACTGAACTGGCGCAGCCTGCTATCAACGGGAAAAACACAT  
TGATATGTGCCCCACAGGATCTGAAAAAGTGTGGCGCTTCTGATTTGTGAACACCA  
TTTCCAAAACGTGCCTGCAGGACAAAAGGCGAAAGTGTCTTTCTTGCAACTAAAGTGCCA  
GTGTACGAACAACAAAAAACTGTGTTCAAGCAGCATTTTGAAGAAGCGGATATTCTGTTCA  
GGGAATTAGTGGTGAAACGGTTGCACATGTATCTGTAGAAAAGGTTATACAGGACAGTGAC  
ATCATTGTGCTGACACCCAGATTCTGTGAATGCCATCGAGGAAGGGATCCTTAGCTCCC  
TCTCCATCTTCACTCTGATGATATTTGATGAGTGCCACAACACTACGGGCAACCACCCTTAC  
AATGTGTTAATGACCAGATACCTGGAACAAAATTCACTCCTCTGCAAACCAGCTGCCTCA  
GATTGTAGGTTTAACTGCTTCTGTTGGAGTTGGTAATGCCAAGAGCATCAAGGAACTATA  
GAGCACATCTGTACCCTCTGCTCCTACCTTGACATACAGGCCATATCCACTGTCAGAGAGA  
ACAAACAGGATCTGCAGAGATTTCGGAACAAGCCAGAAACATATGTCAGATGGGTAAAT  
GCGAGTTCAGAATCACTTTGCAGACATTATCTCAGGTCTGATGTCTGAGACAGAAGTGTTG  
ATGAGGACGATTTACTCAGTGGATACTATCTCCAAAATCAACAAGAATGATTTTGAACACA  
GAAATATGAACACTGGATAGTTGCCACTCAGAAGAAATGCAGACTGTTGCAACTGGCAGAT  
AAGGAGAAGGAGAGCAGCATTGTAGAGACCTTTTCATTTGCACTGAACACCTGCGGAAGT  
TCAACGATGCTCTCATCATCAGTGAAGATGCCCGCATTGAAGATGCTTTAGCCTACCTAAC  
TGAATTTTTCACAAATGTCAAAAATGGACCATATACAGAGTTAGAGAAGCAACTGACAGCCA  
AATTTCAAGAGAAAGAACCAGAAGTGAAGTGCCTTTTCAAAAGATGAATCAAATGAGAATCCC  
AAGCTGGACGAGCTTGCTTGCATCCTGGATGAAGCATACCGCTATAACCCACAGACTCGC  
ACCCTTCTCTTTGCTAAGACAAGAGCCTTAGTAGCTGCCTTGAAGAAGTGGGTAGAAGCAA  
ACCCTCTACTTAGCCACATAAAGCCAGATGTGTTGATGGGTCGTGGAAGAAGAGATCAAAA  
AACAAGTATGACCCTCCCAATGCAGAAGGGGGTACTGGATGCATTCAAACTGACAAAGAC  
AGCAGACTGCTAATTGCTACATCCGTTGCTGATGAAGGCATTGATATTTCTGAATGCAACCT  
TGTTGTGCTCTATGAATACTTCGGTAACGTCACCAAAATGATCCAAGTCAGAGGTCGTGGA  
AGGGCAAAGACAGCAAGTGCATCCTTGTGACAAGCAAAACAGAAGTGGTTGAGAATGAG  
AAATACAACCGTCATAAGGAAGAAATGATGAATGAAGCTATTGAGAAGCTACAGAATTGGG  
ATGAAACAACATTTGCAAGAACGATACATGACCTGCAAATGAAGGAAAAGATATTACGAGAT

TCCAGGAAGAAAGCAACAAGACCTAAGGTAGTGGAAGGGAAAAAAATCTTCTGTGTGGAA  
AATGCAAAGCATATGCCTGCAGTACAGATGACATCAGAATTATAAAGGAATCTCACCACACT  
GTCCTTGGAGATGCGTTCAAGCAGCGTTACATAACAAAGCCTCACCAGAAAGCAGTCCAGT  
TTGATTGTTTTGAGAAAAAAGCAAGATGCATTGCCAAAATAGTAGTTGCCAGCATGACTGG  
GGAATTACAGTGAAGTACAAGACATTTGATAACCTACCAGTGATCAAGATCAAAAGCTTTGT  
AGTAGAGAATGTTGAAACTGGAACCCAAATGGATTTTCAGAAATGGAAAAATATTAATTTTT  
CTTTGAAGAATTTTGACGTTGAAGAAACATCCAGTTGA

>chiroxiphia\_lanceolata-rig1

ATGACGGCGGAGGAGAAGAGAAACCTGCGGTGCTACAGGCGGTACATCGAGAGGATCCT  
GAACCCCGTCTACATCCTGAGCCACATGACGGACTGGCTGTCGGACGAGATGAAGGAGAG  
AGTGCGAAAGGAGGAGGAGAAGGGGGTGACGGCGGCCGCCGCGCTGTTCTTGATACT  
GTGCTGCTGCTGGAGGCGGAAGGCTGGCTCCGGGGCTTTCTGGACGCCCTTGTTGCAGC  
AGGTTACACTGGACTGGCAGAAGCAATAGAAAAGTGGGACTTCAGCAAACTGGAAAACTG  
GAACTGCACAGACAGCTGTTGAAGCGGATAGAAGCAACAATGCTAGAAATTGACCCAGTA  
GCACTCATGCCTTACATAAACACATGCCTGATAGAGAGGGAGTGTGATGAGATCCTGCAGA  
TTTGTGAATACAGAAGCAAAGCAGCGGGGATAACTAACTCATTGAATGTCTCTGTGCTC  
GGATAAGGAAAACTGGCCGAAAAGTCTTCATCTGGCATTGGATATGGCAGGATATTACAAT  
GCAAGTGAAGTGTGGAAGTAAAGAGAAGATAATGGCAAAGATGTTGATGGTGAAATGACAG  
GTGCTCTGAGAATTGTTTTGAAACCACAATAACATTTGCTGAAGAAGCAGAGTGTGATAAT  
AATCTCAGTGAAAATCTTTCTTCGTGTTTCAGGAATGGTCCATCGGTCTTCATCTGTTTATGA  
ACCAAAGAAGGCTCGAAGCTACCAGATTGAACTTGACAGCCTGCTATCAATGGGAAAAAC  
ACATTGATATGTGCCCCTACAGGATCTGGAAAACTTTTGTGGCGCTTCTGATTTGTGAACA  
CCATTTGCAAAACATGCCCTCTGGAAAAAAGCCAAAAGTTGTCTTTCTTGCAACCAAAGTGC  
CAGTGTATGAACAACAGAAAAATGTATTCAGACAGCATTTTGAAGAAGTGGATATTCTGTT  
CAAGGAATATGTGGTGAAACAGTTGCAAGTGTCTCGGTAGAACACGTTATACAGGACAGTG  
ACATCATTGTGCTCACGCCCCAGATTCTTGTGAATAGCATCGAGACTGGGATCCTTAGGTC  
TCTCTCCATCTTCACTCTGATGATATTTGATGAGTGTCAACACACCACAGGCAACCACCCTT  
ACAATGTGTTAATGACCAGATACCTGGAACAAAAATTTAACTCCCCTGCAACCAACTGCCT  
CAGATTGTAGGTTTAACTGCTTCTGTTGGAGTTGGTAATGCCAAGAACATCAAGGAACTAT  
AGAGCACATATGTACCCTCTGCTCCTGCCTTGACATACAGGCCATATCCACTGTCAGAGAG  
AACAAAGAGGATCTGCAGAGATTCGGAAACAAGCCAGAATCACATGTCAGATGGGTTAAAA  
TGCGAGCTCAGAATCACTTTGCAGACATTATCTCAGGTCTGATGTCTGAAACAGAGGCGAT  
GATGAGGAAGATTTACTCATCAGATACTATCTCCCAAATCAACAAGAATGATTTTGGAACAC  
AGAAATATGAACAGTGGATAGTTCTCACTCAGAAGAAATGCAGACTGTTGCAGCTGGCAGA  
TAAGGAGAAGGAGAGCAACATTTGTAGAGACCTTTTTCATTTGTACCGAACACTTGCGGAAA  
TTCAACGATGCTCTCATTATCAGTGAAGACGCACGCATCGAAGATGCTTTAGCCTACCTAA  
ATGAATTTTTCACAAATGTGAAAAATGGACCATATACAGAGTTAGAGAAGCAACTGACGGAC  
AAATTTCAAGAGAAAGAACCAGAACTGACTGCCCTTTCAAAGATGAATCAAATGAGAATCC  
CAAGCTGGAAGAGCTTGCTTCCATCCTGGACGAAGCATACCGCTACAACCCACAACTCG  
CACTATTCTCTTTGCCAAGACAAGAGCCTTAGTAGCTGCTTTGAAGAAGTGGATGGAAGCA  
AACCCTCTACTTAGCCACATAAAGCCAGATGCGTTGATGGGTCAGGGAAGAAAAGAACATA  
AAACAGGTATGACCCTGCCAATGCAGAAGGGTGTGCTGGATGCCTTCAAAGTACAAAG  
ACAGCAGACTGCTAATTGCTACATCTGTTGCTGATGAAGGCATTGATATTTCTGAGTGCAAC  
CTTGTTGTGCTCTATGAATACTTCGGTAATGTCACCAAAATGATCCAAGTCAGAGGTCGTG

GAAGGGCAAAAGACAGCAAGTGCGTCCTTGTGACAAGCAAAGTGGAAGTGGTTGAGAATG  
AAAAACAGAACC GTTATAAGGAAGAAATGATGAATGCAGCTATTGAAAACCTGCAGAACTG  
GGATGAAACAACATTTGCAAGAAAGATACGTGACCTGCAAATGAAGGAAAAGGTATTACGA  
GATTGCAGGAAGAAAAGAACTATGAAACATGAAGTAGTGGAAGGGAAAAAGAATCTTCTGT  
GTGGAAAATGCAAAGCCTATGCCTGCTGTACAGATGACATCAGAATTATAAAGGACTCTCA  
TCACACTGTCTAGGAGATGCATTCAAGGAGCGTTATATAATGAAGCCTCACCAGAAACCA  
CGTCCATTTGATGTTTTTGTAGAAAAAAGCAAGATGCATTGCCAAAAAATAATTGCCAGCA  
TGA CTGGGGGATCACAGTGAAGTACAAGACATTTGATAATCTACCAATCATCAAAATCAGAA  
GCTTTGTAGTAGAGGACATTGAACTGGGACACAGATGGATTTTCAGAAATGGAAAAATATT  
AATTCTTCTTTGAAGAATTTTGATGAAGAAACATCCAGCTGA

>chlamydotis\_macqueenii-rig1

ATGACGGCGGAGGAGAAGAGGGGCCTGCGGTGCTACCGGCGGTACATCGAGAGGAGCC  
TGAACCCCGTCTACATCCTGGGCAACATGGCGGGCTGGCTGTCTCGGAGGAGGTGGAGGAA  
AGAGTCCGGAAGGAGGAGGAGAAGGGAGTGACAGGGGCAGCCGCCGCGCTGTTCTCTGG  
ATGCCGTCTCTGCAGCTGGAAGCGGAGGGCTGGCTGCGGGCCTTCCTGGACGCCCTGGTC  
GCGACAGGTTACACTGGACTAGCAGAAGCAATTGAAAACCTGGGACTTCAGCAAACTGGAA  
AACTGGAGTTACACAGACAGCTGTTGAAGCGGATAGAAGCAACAATGCTAGAAGTTGATC  
CGGTACTGCTCATGCCCTACATAAACACATGCCTGATAGAAAGGGAGTGTAATGAGATCCT  
CCAGATTTGCGAATACAGAAGCAAAGCAGCCGGGATAACTAACTCATCGAATGTCTCTGT  
CGATCCGATAAGGAAAACCTGGCCAAAAAGCCTTCAACTGGCACTAGATAATGAAGGATATT  
ACAATGCAAGTGAAGTGTGGAATATGAGAGAAGATAATGGCAAAGATGTTGATAGTGAAAT  
GACAGATGTCTCTGAGAACAGCTTTGAAACCACGATGACATTTTCTGAAGAAGCAGAATGT  
GACAATAATCTCAGTGCAAATCTCCGTTACAGCTTCAGAAGGAATCAATCAGTCTTCACCTGT  
TTATGAACCGAAGAAGGCTCGGAGCTACCAGACTGAACTTGCACGGCCTGCTATCAATGG  
GAAAAACACATTGATATGTGCCCCACAGGATCTGGAAAACTTTTGTGGCACTTCTGATTT  
GCGAGCACCATTTCCAAACATGCCCGCAGGACAAAAGGCGAAAGTTGTTTTTCTTGCAAC  
TAACTGCCAGTGTACGAACAACAGAAAAATGTATTCAAGCAGCATTTTGAAGAAATGGAT  
ATTCTGTTCAAGGAATTAGTGGTGAAACAGTTGCAAATGTCTCTGTAGAAAAGGTTGTACAG  
GACAGTGACATCATTGTGATGACACCCAGATTCTTGTGAATAGCATCGAGGAAGGGATCC  
TTAGCTCCCTTTCCATCTTCACTCTGATGATATTTGATGAGTGCCACAACACTACAGGCAAC  
CACCTTATAGTGTGTTAATGACCAGATACCTGGAACAAAAATTTGACTCCTCTGCAAACAA  
GCTGCCTCAGATTGTAGGTTTAACTGCTTCTGTTGGAGTTGGTAACGCCAAGAGCATCAAC  
GAAACAATAGAGCATATCTGTATGCTCTGCTCCTACCTTGACATACAGGCTATATCTACTGT  
CAGAGAGAACAAAGAGGATCTCCAGAGATTTGGAAACAAGCCAGAAACATATGTCAGATGG  
GTTAAAATGCGAGCTCGGAATCACTTTGCAGACATTATCTCAGATCTGATGACTGAGACAG  
AGGCGTTGATAAGGAAGATTTACTCAGTGGATACTATCTCTCCAATGAACAAGAATGATTTT  
GGAACACAGAAATATGAACACTGGATAATTACCACTCAGAAGAAATGCAGACTGTTGCAAC  
TGGCAGATAAGGAGAAAGAGAGCAGCATTTGTAGAGACCTTTTCATTTGCACTGAACACCT  
GCGGAAATTCAATGATGCTCTTATCATCAGTGAAGATGCCCGCATTGAAGACGCTTTGGCC  
TACCTAACTGAATTTTTCACAAATGTAAAAAATGGACCATATACAGAGTTAGAGAAGCGACT  
GACAGCCAGATTTCAAGAGAAAGAATCAGAACTCATTGCCCTCTCAAAGATGAATCAAAT  
GAGAATCCCAAGCTGGAAGAGCTTGCTTGATCCTGGATGAAGCACACAGATATAACCCAC  
AGACTCGCACTCTTCTCTTTGCTAAGACAAGAGCCTTAGTAGCTGCTTTGAAGAAGTGGAT  
AGAAGCAAACCCTCTGCTTAGCCACATAAAGCCAGATGTGTTGATGGGTCTGGAAAAAGA

GATCAAAAAGCAGGTATGACCCTCCCAATGCAGAAGGGTGTACTGGATGCATTCAAAACCA  
ATGAAGACAGCAGACTGCTAATTGCTACATCTGTTGCTGACGAAGGCATTGATATTTCTGA  
GTGCAACCTTGTTGTGCTCTATGAATACTTTGGTAATGTCACCAAAATGATTCAAGTCAGAG  
GTCGTGGAAGGGCAAAAGGCAGCAAGTGCATCCTTGTGACAAGCAAAACAGAAGTGGTTG  
AAAATGAGAAACACAACCGTTACAAGGAAGAAATGATGAATGAAGCTATTGAAAACTACA  
GAATTGGGATGAAACAACATTTACAAGAAAGATATATGACCTGCAAATGAAGGAAAAGGTAT  
TACAAGACTTCAGAAAGAAAGAAACAAGACCTAAGTTAGAGGAAGGGAAAAAAAATCTTCT  
GTGTGGAAAATGCAAAGTATATGCCTGCAGTACAGATGACATCAGAGTTATAAAGGAATCT  
CATCACATTGTCCTAGGCGACGCGTTCAAGGAGCGTTACATAACAAAGCCTTCCAAGAAAC  
TCGTCCAATTTGATTGTTTTGAGAAAAAAGCAAGATGCATTGCCAAAATACTAATTGCCAG  
CATGACTGGGGAATCATAGTGAAGTACAAGACATTTGATAATCTACCAGTGATCAAAATCAA  
AAGCTTTGTAGTAGAAAATGTTGAACTGGGACACAAATGGATTTTCAGAAATGGAGAAATA  
TTAATTTTTCTTTGAAGAATTTTGATGTTGAAGAAATGTCCCGCTGA

>cicinnurus\_regius-rig1

ATGACGGCGGACGAGAAGAGGAACCTGCGGTGCTACAGGCGGTACATCGAGAGGAGCCT  
GAACCCCGTGACATCCTCGGCAACATGACGGACTGGCTGTCCGACGAGGTGAAGGAGA  
GAGTCCGAAAGGAGGAGGAGAAGGGGGTGACGGCGGCCGCCGCGCTGTTCTGGATGC  
CGTGCTGCTGCTGGAGGCGGAGGGCTGGCTGCGGGGCTTCCTGGATGCCCTGGTTGCCG  
CAGGTTACACTGGACTGGCAGAAGCAATTGAAACTGGGACTTCAGCAGGCTGGAAAAAC  
TGGAGCTGCACAGGCAGCTGTTGAAGCGGATAGAAGCAACAATGCTAGAAATTGATCCAAT  
AGCAATCATGCCATACATAAACACATGCCTGATAGAGAGGGAGTGTGATGAGATCCTGCAG  
ATCAGTGAATACAGAAGCAAAGCAGCCGGGATAACTAACTCATTGAATGCCTCTGTGCT  
CGGACAAAGAAAACCTGGCCCCAAAAGTCTTCAGCTGGCATTGGATAATGCAGGGTATTACAA  
TGCAAGTGAACCTGTGGAATATAAGAGAAGTTAACAGCAAAGATATTGATGATGAAATAACAG  
GTGCTCTGAGAATTACTTTGAAACCATGGTGACATTTTCTGAAGAAGCAGAATGTGATAAT  
CTCAGTGAAAATCTCTCTTCAGCTTCAGAAAGGGTCTGTGAGTCTTCATCTGTTTATGAACC  
AAAGAAGGCTCGGAGCTACCAGATTGAGCTTGACACAGCCTGCAATTGATGGGAAAAACAC  
ATTGATTTGTGCCCCACAGGATCTGGAAAACTTTTGTGGCACTTCTGATTTGTGAACATC  
ATTTGCAAAACATTCCTTCAGGACGAAAGGCAAAAGTTGTCTTCCTTGCAACCAAAGTGCC  
AGTATATGAGCAACAGAAAAATGTATTCAGGCAGCATTTTGAAGAAGTGGATACTCTGTTT  
AGGGAATTTGTGGTGAAACAGTTGCAAAATATCTGTGTAGAAAATGTTATACAGGACAGCGA  
CATCATTGTGCTAACGCCCCAGATTCTTGTGAATAGCATGGAGAAAGGGATCCTTAGCTCC  
CTCTCCATCTTCACTCTGATGATATTTGATGAGTGCCACAACACTACAGGCAACCACCCTTA  
CAATGTGTTGATGACCAGATACCTGGATCAAAAATTTGACTCCTCTGCAACCCAGCTGCCT  
CAGATTGTAGGTTTAACTGCTTCTGTTGGAGTTGGTAATGCCAAGAGCATCAATGAACTGT  
AGAGCACATCTGTACCCTCTGCTCCTACCTTGACATACAGGCCATATCCACTGTCAGAGAG  
AACAAACAAGATCTGCAGAGGTTTCGGAAATAAGCCGGAAACACATATCAGATGGGTAAAA  
TGCGAGCTCAGAATCACTTTGCAGACATTATCTCAGGTCTGATGTCTGAGACAGAGGTGTT  
GATGAGGAAGATTTACCCAGTGGATACCGTCTCTCAAATCAACAAGAATTACTTTGGGACA  
CAGAGATATGAACACTGGATAGTTTTCACTCAGAAGAAATGCAGACTGCTGCAACTGGAAG  
ATAAGGAGAAGGAGAGCAACATTTGTAGAGACCTTTTCATTTGTAAGCACTTGCGGAA  
ATTCAACGACGCTCTCATTATCAGTGAAGATGCCCGCATCGAAGATGCTTTAGCCTACCTA  
AATGAATTTTTACAAATGTAAAAAATGGACCATATACAGAGTTAGAGAAGCAACTGACGGA  
CAAATTTCAAGAGAAAGAACCAGAGCTGACTGCCCTTTCAAAGATGAGTCAAATGAGAAT

CCAAAGCTGGAAGAGCTTGCTTGCATCCTGGACGAAGCATACCGCTATAACCCACAGACT  
CGCACTATTCTCTTTGCCAAGACGAGAGCCTTAGTAGCCGCTTTGAAGAAGTGGATACAAG  
CAAACCCCTCTACTTAGCCACATAAAGCCAGATGTGTTGATGGGTAAGGGAAGTAAAGATCA  
TAAACAGGTATGACTCTGCCAATGCAGAAGGGTGTACTGGATGCATTCAGAAATGACAAA  
GACATCAGACTGCTAATTGCTACATCTGTTGCTGACGAAGGCATTGATATTACCGAGTGCA  
ACCTTGTGGTGCTCTATGAATACTTCGGTAATGTCACCAAATGATCCAAGTCAGAGGTGCG  
TGGAAGGGCAAGAGACAGCAAGTGCATCCTTGTGACAAGCAAAAGAGAAGTGGTTGAGAA  
TGAAAAACAAAACAGTTATAAGGAAGAAATGATGAATGCAGCTATTGAAAAGCTACAGAACT  
GGGATGAAACAACATTTGCAAGAAAGATACGTGACCTGCAAATGAAGGAAAAGAACTACG  
AGATTCCAGGAAGAAGGAAACAAAACATAAAGTAGTGGAAGGGAAAATAAATCTTTTGTGT  
GGAAAATGCAAAGCATATGCCTGCAGTACAGATGACATCAGAGTTATAAAGGAATCTCATC  
ACACTGTCCTAGGTGACGCATTCAAGGAGCGTTATATAACAAAGCCCCACAGCAAACTGCT  
TCAGTTTGTATGGTTTTGAGAAAAAAGCAAGATGCATTGCCGAAATACTGACTGCCAGCAT  
GACTGGGGGATCACAGTGAAGTACAAGACATTTGATAATCTACCAGTGATCAAAATCAAAA  
GCTTTGTACTAGAGAACGTTGAAACTGGGACACAAATGGATTTTCAGAAATGGAGAAGTAT  
TAATTTCTCTTTGAAGAATTTTGATGAAGAAAATGAGCTGAACTCAACATTTTAA

>ciconia\_boycciana-rig1

ATGACCGCGGAGGAGAAGAGGAGCCTGCAGTGCTACAGGCGGTACATCGAGAAGAGCCT  
GAACCCCGTCTACATCCTGAGCAACATGACGGACTGGCTGTCCGACGAGGTGAAGGAGAA  
AGTCCGGAAGGAGGAGGAGAAGGGGGTGATGGCGGCCGCGCGCTGTTCTGGATGCC  
GTCCTGCAGCTGGAGGCGGAGGGCTGGCTCCGGGGCTTCCTGGACGCCCTGGTAGCAG  
CAGGTTACACTGGACTGGCAGAAGCAATTGAAAAGTGGGACTTCAGCAAGCTGGAAAACT  
GGAGTTGCACAGACAGCTGTTGAAGCGGATAGAAGCAACAATGCTGGAAGTTGATCCAGT  
AGCACTCATGCCCTACATAAACACATGCCTGATAGAAAGGGAGTGTGATGAGATCCTGCAG  
ATTAGCGAATACAGAAGCAAAGCAGCTGGGATAACTAACTCATCGAATGTCTCTGTGAT  
CGGATAAGGAAAAGTGGCCGAAAAGCCTTCAGCTGGCACTAGATAACACAGGATATTACAA  
TGCAAGTCAACTGTGGGATATGAGAGAAGATAATGGCAAAGATGTTGATGGTGAAATGACA  
GATGCCTCTGAAAACAGCTTTGAAACCATAATGACATTTTCTGAAGAACCCGAATGTGATAA  
TAATCTCAGTGAAAATCTCTGTTTCAGCTTCAGAAGGGATCTATCAGTCTTCACCTGTTTATG  
AACCAAAGAAGGCTCGGAGCTACCAGACTGAACTTGCGCAGCCTGCTGTGAGTGGGAAAA  
ACACATTGATATGTGCCCCACAGGATCTGGAAAACTTTTGTGGCACTTCTGATTTGTGAA  
CACCATTTCCAAAACACGCCTGCAGGACGAAAGGCGAAAGTTGTCTTTCTTGCAACTAAAG  
TGCCAGTGTATGAACAACAGACAACTGTATTCAGGCAGCATTTTGAAAGAAGTGGATATTCT  
GTTCAAGGAATTAGTGGTGAAACAGTTGCAAATGTCTCTGTAGAAAAGGTTATACAGGACA  
GTGACATCATTGTGCTGACACCCAGATTCTTGTGAATAGCATCGAGGAAGGGATCCTTAG  
CTCCCTCTCCATCTTCACTCTGATGATATTTGATGAGTGCCACAACACTACAGGCAACCAC  
CCTTACAATGTGTTAATGACCAGATACCTGGAACAAAAATTTGACTCCTGTGCAACCAGCT  
GCCTCAGATTGTAGGTTTAACTGCCTCTGTTGGAGTTGGTAATGCCAAGAGCATCAGGGAA  
ACGATAGAGCACATCTGTACCCTCTGCTCCTACCTTGACATACAGGCCATATCCACTGTCA  
GAGAGAACAAAGAGGATCTGCAGAGATTGAGAAACAAGCCAGAAACATATGTCAGATGGG  
TTAAATGCGAGTTCAGAATCACTTTGTGGACATTATCGCAGGTCTGATGTCTGAGACAGA  
GGCGTTGATGAGGAAGATTTACTCAGTGGATACTATCTCTCAAATCAACAAGAATGATTTTG  
GAACACAGAAATATGAACAGTGGATAGTTGCCACTCAGAAGAAATGCAGACTGTTGCAACT  
GGCAGATAAGGAAAAGGAGAGCAGCATTTGTAGAGACCTTTTCATTTGCACTGAACACCTA

CGGAAATTC AATGATGCTCTCATCATCAGTGAAGATGCCCCGCATCGAAGATGCTTTAGCCT  
ACCTAACTGAGTTTTTTCACAAATGTCAAAAATGGACCATATACAGAGTTAGAGAAGCAACTG  
ACAGCCAAATTTCAAGAGAAAAGAACCAGAAATGACTGCCCTTTCAAAAGATGAATCAAATGA  
GAATCCCAAGCTGGAAGAGCTTGCTTGCATCCTGGATGAAGCGTACCGCTATAACCCACA  
GACTTGCACTCTTCTCTTTGCTAAGACAAGAGCCTTAGTAGCTGCTTTGAAGAAGTGGATA  
GAAGCAAACCCTCTACTTAGCTACATAAAGACGGATGTGTTGATGGGTCGTGGAAGAAGAG  
ATCAAAAAACAGGTATGACCCTCCCAATGCTGAAGGGTGTACTGGATGCATTCAAAACCAA  
CAAAGACAGCAGACTGCTAATTGCTACATCTGTTGCTGACGAAGGCATTGATATTTCTGAG  
TGCAACCTTGTTGTGCTCTATGAATACTTCGGTAATGTCACCAAAATGATCCAAGTCAGAGG  
TCGTGGAAGGGCAAAAGACAGCAAGTGTATCCTTGTGACAAGCAAAACAGAAGTGGTTGA  
GAATGAGAAACACAACCGTTATAAGGAAGAAATGATGAATGAAGCTATTGAAAAGCTACAG  
AATTGGGATGAAGCAACATTTGCAAGAAAAGATACATGACCTGCAAAACAAAGGAAAAGGTAT  
TACGAGATTCCAGGAAGAAAGAAACAAGACCTAAGGTAGTGGAAGGGAAAAAAATCTTCT  
ATGTGGAAAATGCAAAGCATATGCCTGCAGTACAGATGACATCAGAGTTATAAAGGAATCC  
CATCACACTGTCCTAGGAGACGCGTTCAAGGAGCGTTATATAACAAAGCCTCACCAGAAAC  
CAGTCCAGTTTGATGGTTTTCTGAAAAAAGCAAGATGCATTGCCAAAATACTAACTGCCAG  
CATGACTGGGGAATCATAGTGAAGTACAAGACATCTGATAATCTACCAGTGATCAAAATCAA  
AAGCTTTGTAGTAGAGAATGTTGAAACTGGGACACAAATGGATTTTCAGAAATGGAAAGATA  
TTAATTTTTCTTTGAAGAATTTTGATGTTGAAGAAACGTCCAACCTGA

>ciconia\_ciconia-rig1

ATGACCGCGGAGGAGAAGAGGAGCCTGCAGTGCTACAGGCGGTACATCGAGAAGAGCCT  
GAACCCCGTCTACATCCTGAGCAACATGACGGACTGGCTGTCCGACGAGGTGAAGGAGAG  
AGTCCGGAAGGAGGAGGAGAAGGGGGTGATGGCGGCCGCCGCGCTGTTCTTGATGCC  
GTCCTGCAGCTGGAGGCGGAGGGCTGGCTCCGGGGCTTCCTGGACGCCCTGGTAGCAG  
CAGGTTACACTGGACTGGCAGAAGCAATTGAAAAGTGGGACTTCAGCAAGCTGGAAAACT  
GGAGTTGCACAGACAGCTGTTGAAGCGGATAGAAGCAACAATGCTGGAAGTTGATCCAGT  
AGCACTCATGCCCTACATAAACACATGCCTGATAGAAAGGGAGTGTGATGAGATCCTGCAG  
ATTAGCGAATACAGAAGCAAAGCAGCTGGGATAACTAACTCATCGAATGTCTCTGTCTGAT  
CGGATAAGGAAAACTGGCCGAAAAGCCTTCAGCTGGCACTAGATAACACAGGATATTACAA  
TGCAAGTCAACTGTGGGATATGAGAGAAGATAATGGCAAAGATGTTGATGGTGAAATGACA  
GATGCCTCTGAAAACAGCTTTGAAACCATAATGACATTTTCTGAAGAACCCGAATGTGATAA  
TAATCTCAGTGAAAATCTCTGTTTCAGCTTCAGAAGGGATCTATCAGTCTTCACTTGTTTATG  
AACCAAAGAAGGCTCGGAGCTACCAGACTGAACTTGCGCAGCCTGCTGTCAGTGGGAAAA  
ACACATTGATATGTGCCCCACAGGATCTGGAAAACTTTTGTGGCACTTCTGATTTGTGAA  
CACCATTTCCAAAACACGCCTGCAGGACGAAAGGCGAAAGTTGTCTTTCTTGCAACTAAAG  
TGCCAGTGTATGAACAACAGACAACCTGTATTCAGGCAGCATTTTGAAGAAGTGGATATTCT  
GTTCAAGGAATTAGTGGTGAAACAGTTGCAAATGTCTCTGTAGAAAAGGTTATACAGGACA  
GTGACATCATTGTGCTGACACCCCAGATTCTTGTGAATAGCATCGAGGAAGGGATCCTTAG  
CTCCCTCTCCATCTTCACTCTGATGATATTTGATGAGTGCCACAACACTACAGGCAACCAC  
CCTTACAATGTGTTAATGACCAGATACCTGGAACAAAAATTTGACTCCTGTGCAACCAGCT  
GCCTCAGATTGTAGGTTTAACTGCCTCTGTTGGAGTTGGTAATGCCAAGAGCATCAGGGAA  
ACGATAGAGCACATCTGTACCCTCTGCTCCTACCTTGACATACAGGCCATATCCACTGTCA  
GAGAGAACAAAGAGGATCTGCAGAGATTGAGAAACAAGCCAGAAACATATGTCAGATGGG  
TTAAATGCGAGTTCAGAATCACTTTGTGGACATTATCGCAGGTCTGATGTCTGAGACAGA

GGCGTTGATGAGGAAGATTTACTCAGTGGATACTATCTCTCAAATCAACAAGAATGATTTTG  
GAACACAGAAATATGAACAGTGGATAGTTGCCACTCAGAAGAAATGCAGACTGTTGCAACT  
GGCAGATAAGGAAAAGGAGAGCAGCATTGTAGAGACCTTTTCATTTGCACTGAACACCTA  
CGGAAATTCAATGATGCTCTCATCATCAGTGAAGATGCCCCGCATCGAAGATGCTTTAGCCT  
ACCTAACTGAGTTTTTACAAATGTCAAAAATGGACCATATACAGAGTTAGAGAAGCAACTG  
ACAGCCAAATTTCAAGAGAAAAGAACCAGAAATGACTGCCCTTTCAAAGATGAATCAAATGA  
GAATCCCAAGCTGGAAGAGCTTGCTTGCATCCTGGATGAAGCGTACCGCTATAACCCACA  
GACTTGCCTCTTCTCTTTGCTAAGACAAGAGCCTTAGTAGCTGCTTTGAAGAAGTGGATA  
GAAGCAAACCCTCTACTTAGCTACATAAAGACGGATGTGTTGATGGGTCGTGGAAGAAGAG  
ATCAAAAAACAGGTATGACCCTCCCAATGCTGAAGGGTGTACTGGATGCATTCAAACCAA  
CAAAGACAGCAGACTGCTAATTGCTACATCTGTTGCTGACGAAGGCATTGATATTTCTGAG  
TGCAACCTTGTTGTGCTCTATGAATACTTCGGTAATGTCACCAAAATGATCCAAGTCAGAGG  
TCGTGGAAGGGCAAAGACAGCAAGTGTATCCTTGTGACAAGCAAAACAGAAGTGGTTGA  
GAATGAGAAACACAACCGTTATAAGGAAGAAATGATGAATGAAGCTATTGAAAAGCTACAG  
AATTGGGATGAAGCAACATTTGCAAGAAAAGATACATGACCTGCAAACAAAGGAAAAGGTAT  
TACGAGATTCCAGGAAGAAAGAAACAAGACCTAAGGTAGTGGAAGGGAAAAAAATCTTCT  
ATGTGGAAAATGCAAAGCATATGCCTGCAGTACAGATGACATCAGAGTTATAAAGGAATCC  
CATCACACTGTCCTAGGAGAYGCGTTCAAGGAGCGTTATATAACAAAGCCTCACCAGAAAC  
CAGTCCAGTTTGATGGTTTTCTGAAAAAAGCAAGATGCATTGCCAAAATACTAACTGCCAG  
CATGACTGGGGAATCATAGTGAAGTACAAGACATCTGATAATCTACCAGTGATCAAAATCAA  
AAGCTTTGTAGTAGAGAATGTTGAAACTGGGACACAAATGGATTTTTCAGAAATGGAAAGATA  
TTAATTTTCTTTGAAGAATTTTGATGTTGAAGAAACGTCCAACCTGA

>ciconia\_episcopus-rig1

ATGACCGCGGAGGAGAAGAGGAGCCTGCAGTGCTACAGGCGGTACATCGAGAAGAGCCT  
GAACCCCGTCTACATCCTGAGCAACATGACGGACTGGCTGTCCGACGAGTTGAAGGAGAG  
AGTCCAGAAGGAGGAAGAGAAGGGCGTGATGGCGGCCGCCGCGCTGTTCCCTGGATGCCG  
TCCTGCAGCTGGAGGCGGAGGGCTGGCTCCGGGGCTTCCTGGACGCCCTGGTAGCAGCA  
GGTTACACTGGACTGGCAGAAGCAATTGAAAACCTGGGACTTCAGCAAACCTGGAAAACTG  
GAGTTGCACAGACAGCTGTTGAGGCGGATAGAAGCAACAATGCTGGAAGTTGATCCGGTA  
GCACTCATGCCCTACATAAACACATGCCTGATAGAAAGGGAGTGTGATGAGATCCTGCAGA  
TTAGCGAATACAGAAGCAAAGCAGCTGGGATAACTAACTCATTGAATGTCTCTGTGCATC  
GGATAAGGAAAACCTGGCCGAAAAGCCTTCAGCTGGCACTAGATAACACAGGATATTACAAT  
GCAAGTCAACTGTGGGATATGAGAGAAGATAATGGCAAAGATGTTGATGGTGAAATGACAG  
ATGCTTCTGAAAACAGCTTTGAAACCACGATGACATTTTCTGAAGAACCCGAATGTGATAAT  
AATCTCAGTGAATACTCTGTTCAGCTTCAGAAGGGATCTATCAGTCTTCACTTGTTTATGA  
ACCAAAGAAGGCTCGGAGCTACCAGACTGAACTTGCGCAGCCTGCTGTCAGTGGGAAAAA  
CACATTGATATGTGCCCCCACAGGATCTGGAAAAACTTTTGTGGCACTTCTGATTTGTGAAC  
ACCATTTCCAAAATGTGCCTGCAGGACGAAAGGCGAAAGTTGTCTTTCTTGCAACTAAAGT  
GCCAGTGTATGAACAACAGACAACTGTATTCAGGCAGCATTTCGAAAGAAGTGGATATTCT  
GTTCAAGGAATTAGTGGTGAAACAGTTGCAAATGTCTCTGTAGAAAAGGTTATACAGGACA  
GTGACATCATTGTGCTGACACCCCAGATTCTTGTGAATAGCATCGAGGAAGGGATCCTTAG  
CTCCCTCTCCATCTTCACTCTGATGATATTTGATGAGTGCCACAACACTACAGGCAACCAC  
CCTTACAATGTGTTAATGACCAGATACCTGGAACAAAAATTTGACTCCTGTGCAACCAGCT  
GCCTCAGATTGTAGGTTTAACTGCCTCTGTTGGAGTTGGTAATGCCAAGAGCATCACGGAA

ACGATAGAGCACATCTGTACCCTCTGCTCCTACCTTGACATACAGGCCATATCCACTGTCA  
GAGAGAACAGAGAGGATCTGCAGAGATTGAGAAACAAGCCAGAAACATATGTCAGATGGG  
TTAAAATGCGAGTTCAGAATCACTTTGTGGACATTATCGCAGGTCTGATGTCTGAGACAGA  
GGCGTTGATGAGGAAGATTTACTCAGTGGATACTATCTCTCAAATCAACAAGAATGATTTTG  
GAACACAGAAATATGAACACTGGATAGTTGCCACTCAGAAGAAATGCAGACTGTTGCAACT  
GGCAGATAAGGAAAAGGAGAGCAGCATTGTAGAGACCTTTTCATTTGCACTGAACACCTG  
CGGAAATTCAATGATGCTCTCATCATCAGTGAAGATGCCCCGCATCGAAGATGCTTTAGCCT  
ACCTAACTGAGTTTTTACAAATGTCAAAAATGGACCATATACAGAGTTAGAGAAGCAACTG  
ACAGCCAAATTTCAAGAGAAAAGAACCAGAAATGACTGCCCTTTCAAAGATGAATCAAATGA  
GAATCCCAAGCTGGAAGAGCTTGCTTGCATCCTGGATGAAGCATACCGCTATAACCCACAG  
ACTCGCACTCTTCTCTTTGCTAAGACAAGAGCCTTAGTAGCTGCTTTGAAGAAGTGGATAG  
AAGCAAACCTCTACTTAGCTACATAAAGCCGGATGTGTTGATGGGTCGTGGAAGAAGAGA  
TCAAAAAACAGGTATGACCCTCCCAATGCAGAAGGGTGTACTGGATGCATTCAAACCAAC  
AAAGACAGCAGACTGCTAATTGCTACATCTGTTGCTGACGAAGGCATTGATATTTCTGAGT  
GCAACCTTGTTGTGCTCTATGAATACTTCGGTAATGTCACCAAAATGATCCAAGTCAGAGGT  
CGTGGAAGGGCAAAAGACAGCAAGTGCATCCTTGTGACAAGCAAACCAGAAGTGGTTGAG  
AATGAGAAACACAACCGTTATAAGGAAGAAATGATGAATGAAGCTATTGAAAAGCTACAGA  
ATTGGGATGAAGCAACATTTGCAAGAAAGATACATGACCTGCAAACGAAGGAAAAGGTATT  
ACGAGATTCCAGGAAGAAAGAAACAAGACCTAAGGTAGTGGAAGGGGAAAAAATCTTCTG  
TGCGGAAAATGCAAAGCATATGCCTGCAGTACAGATGACATCAGAGTTATAAAGGAATCTC  
ATCACACTGTCCTAGGAGACGCGTTCAAGGAGCGTTATATAACAAAGCCTCACCAGAAACC  
AGTCCAGTTTGATGGTTTTCTGAAAAAAGCAAGATGCATTGCCAAAATACTAACTGCCAGC  
ATGACTGGGGAATCATAGTGAAGTACAAGACATCTGATAATCTACCCGTGATCAAATCAA  
AGCTTTGTAGTAGAGAACGTTGAAACTGGGACACAAATGGATTTTCAGAAATGGAAGATA  
TTAATTTTTCTTTGAAGAATTTTGATGTTGAAGAAACGTCCAACCTGA

>columba\_livia-rig1

ATGACCGCGGAGGAGAAGAGGAGCCTGCAGTGCTACAGGCGGTACATCGAGAGGAGCCT  
GAACCCCGTCTACATCCTGAGCAACATGTCGGACTGGCTGTCGGACGAGATGAAGGAGAG  
AGTCCGGAAGGAGGAGGAGAAGGGGGTGACGGCGGCCGCCGCGCTGTTTCTGGACATCA  
TCCTGCAGCTGGAGGCGGAGGGCTGGCTCCGGGGCTTTCTGGACGCCCTGGCTGCAGCA  
GGTTATACTGGGCTAGCAGAAGCGATTGAAAACCTGGGACTTCAGCAAACCTGAAAAAAGT  
GAGTTGTACAGGCAGCTGTTGAAGCGGATAGAAGCAACAATGCTGGAAGTTGATCCAGTA  
GCACTCATGCCCTACATGAACAGCTGCCTGATAGAAAGGGAGTGTGATGAGATCCTGCAG  
ATTAGTGAATACAGAAGCAAAGCAGCTGGGATAACTAACTCATTGAATGCCTCTGTGAT  
CGGACAAGGAAAACCTGGCCGAAAAGCCTTCAGCTGGCACTAGATAACACAGGATACTACA  
ATGCAAGTGAACCTGTGGGGCATTAGAGAAGATCGTGGCAAAGATGTTGACGGTGAAATGG  
CAGACGCCTCTGAAAGCAGCTTTGAAATCAGGATGACATTTTCTGAAGAAGCAGAATGTGA  
CAATAACCTCAGTGAAAATGTCAGTTCAGCTTCAGGGACCTATCAGTCTTCAGCTGTTTATG  
AACCAAAGGAGGCTCGGAGCTACCAGATTGAACTTGACAGCCTGCTATCAATGGGAAGA  
ACACATTGATATGTGCTCCACAGGATCTGGAAAACTTTTGTGGCGATTCTGATTTGTGAA  
CACCATTTCCAAAACATGCCACAGGACAAAAGGCGAAAGTTGTCTTTCTTGCAACTAAAG  
TGCCAGTGTATGAACAACAGAAAAATGTGTTCAAACAGCATTTTGGAAAGAGTGGATATTCT  
GTTCAAGGAATTTGTGGTGAAATAGTTGCAAATGTCTCTGTAGAAAAGGTTATACAGGACA  
GCGACATCATTGTGCTAACACCTCAGATTCTTGTGAATACCATCAAGAAAGGAACGCTTAG



CTCCCTCTCCATCTTCACTCTGATGATATTTGATGAATGCCACAACACTACGGGCAACCAC  
CCTTACAATGTGTTAATGACCAAATACCTGGAACAAAAATTTGACTCCTCTGCAAACCAGCT  
GCCACAGATTGTAGGTTTAACTGCTTCTGTTGGAGTTGGTAATGCCAAGGACATCACTACA  
ACTGAAGAGCACATCTGTACCCTCTGCTCCTACCTTGACATACAGGCCATTTCCACTGTCA  
GAGAGAACAAAGAGGAACTGCAGCGATTCTATAACAAACCAGAGACAGATGTCAGACTGG  
TTAGAATGCGACTTCAGAATCACTTTGCAGACATTATTTTCAGGTCTCATGTCTGAGACAGAG  
GCAAGGATGAGGGAGATCTACTCACTGGATGATATCTCTCAAATGAACAAGAATGATTTTG  
GAACGCAGAAATATGAACACTGGATAGTTACCACACAGAAGAAATACAGACTGTTGCAGCT  
GGCAGACAAGGAGAAGGAGAGCAGCATTTCAGAGACATTTTCATCTGCACTGAGCACCT  
GCGTAAATTCAATGACGCTCTCATCATCAGTGAAGATGCCCCGTATTGAAGATGCTTTAGCC  
TACCTAACTGAATTTTTCACAAATGTCAAAAACGGACCATTTACAGAATTAGAGAAGCAGCT  
GACAGCCAGATTTCAAGAGAAAGAACCAGAAGTACTGCCCTTTCAAAGGATCAATCAAAT  
GAGAATCCCAAGCTGGAAGAGCTTGCTGCCATCCTGGATGAAGCATACCGCTACAACCCA  
CAGACTCGCACTCTTCTCTTTGTTAAGACAAGAGCCTTAGTAGCTGCTTTGAAGAAGTGGA  
TGAAAGCAAACCCTCTGCTTAGCCACATAAAGCCAGATGTGTTGATGGGTCATGGAGGAAG  
AGATCACAAAACAGGTATGACCCTCCCAATGCAGAAGGCTGCACTGGATGCATTCAAACG  
GACCAGGACAGCAGACTGCTAATTGCTACATCTGTTGCTGATGAAGGCATTGATATTTCTG  
AGTGCAACCTTGTTGTGCTCTATGAATACGACGGTAACCTCACCAAATGATCCAAGTCAG  
AGGTCGTGGAAGGGCAAGAGACAGCAAGTGCATCCTTGAGACGAGCAGAGCAGACGTGG  
TTGAGAATGAGAAACATAACTGTTATAAAGAAGAAATGATGAACGAAGCTATTGAAAACCTA  
CAGAATTGGGATGAAACAATATTCGCAAGAAAGATACAAGAGCTGCAAATGAAGGAAAATG  
TATTACGAGATTCCAGGAAGAAAGAAACAAGACCTAAGGGAGCGGAAGGGAAAAAAATCT  
TCTGTGTGGAATGCAAAGCATATGCCTGCAGTACAGATGACATCAGAGTTATAAAGGAA  
TCTCATCACTGTTCATAGAAGATGCGTTCAAGGAGCGTTATATGACAAAGCCCCACAAGA  
AGCCAGTCTGTTTTGATTGTTTTGAGAAAAGGAGCAAAATGTATTGCCAAATGCTGACTGC  
CACCATGACTGGGGAATCACAGTGAAGTACAAGACGTTTGACAATCTACCCGTGATCAAAA  
TCAAAAGCTTTGTAGTAGAGGATGTTGAAACCAGGACACAAATGGATTTTCAGAAATGGAA  
ACTTATTAATCTCTCTTGGAGAATTTTGATGATGAAGAAACATCCAGCTAA

>corapipo\_altera-rig1

ATGACGGCGGAGGAGAAGAGAAACCTGCGGTGCTACAGGCGGTACATCGAGAGGATCCT  
GAACCCCGTCTACATCCTGAGCAACATGACGGACTGGCTGTCGGACGAGATGAAGGAGAG  
AGTGCGAAAGGAGGAGGAGAAGGGGGTGACGGCGGCCGCGCTGTTCTGATACC  
GTGCTGCTGCTGGAGGCGGAAGGCTGGCTCCGGGGCTTTCTGGACGCCCTTGTTGCAGC  
AGGTTACACTGGACTGGCAGAAGCAATAGAAAAGTGGGACTTCAGCAAACTGGAAAACTG  
GAACTGCACAGACAGCTGTTGAAGCGGATAGAAGCAACAATGCTAGAAATTGACCCAGTA  
GCACTCATGCCTTACATAAACACATGCCTGATAGAGAGGGAGTGTGATGAGATCCTGCAGA  
TTTGTGAATACAGAAGCAAAGCAGCGGGGATAACTAACTCATTGAATGTCTCTGTGCTC  
GGATAAGGAAAAGTGGCCGAAAAGTCTTCATCTGGCATTGGATATGGCAGGATATTACAAT  
GCAAGTGAAGTGTGGAATTTAAGAGAAGATAATGGCAAAGATGTTGATGGTGAAATGACAG  
GTGCTCTGAGAATTGCTTTGAAACCACGATAACATTTGCTGAAGAAGCAGAGTGTGATAA  
TAATCTCAGTGAATCTTTCTTCGGGTTGAGGAATGGTCCATCGGTCTTCATCTGTTTATG  
AACCAAAGAAGGCTCGAAGCTACCAGATTGAACTTGACAGCCTGCTATCAATGGGAAAAA  
CACATTGATATGTGCCCTACAGGATCTGGAAAGACTTTCTGGCGCTTCTGATTTGTGAA  
CACCATTTGCAAAACATGCCCTCTGGAAAAAGCCAAAAGTTGTCTTTCTTGCAACCAAAGT

GCCAGTGTATGAACAACAGAAAAATGTATTCAGACAGCATTTTGAAGAAGTGGATATTCTG  
TTCAAGGAATATGTGGTGAAACAGTTGCAAATGTCTCGGTAGAACATGTTATACAGGACAG  
TGACATCATTGTGCTCACGCCCCAGATTCTTGTGAATGTCATCGAGACTGGGATCCTTAGC  
TCTCTCTCCATCTTCACTCTGATGATATTTGATGAGTGTCAACACCACAGGCAACCACCC  
TTACAATGTGTTAATGACCAGATACCTGGAACAAAAATTTAACTCCTCTGCAAACCAACTGC  
CTCAGATTGTAGGTTTAACTGCTTCTGTTGGAGTTGGTAATGCCAAGAACATCAAGGAACT  
ATAGAGCACATATGTACCCTCTGCTCCTGCCTTGACATACAGGCCATATCTACTGTCAGAG  
AGAACAAAGAGGATCTGCAGAGATTGCGAAACAAGCCAGAATCACATGTCAGATGGGTAA  
AATGCGAGCTCAGAATCACTTTGCAGACATTATCTCAGGTCTGATGTCTGAAACAGAGGCG  
ATGATGAGGAAGATTTACTCATCAGATACTATCTCCCAAATGAACAAGAATGATTTTGGAAC  
ACAGAAATATGAACAGTGGATAGTTCTCACTCAGAAGAAATGCAGACTGTTGCAGCTGGCA  
GATAAGGAGAAGGAGAGCAACATTTGTAGAGACCTTTTCATTTGTACCGAACACTTGCGGA  
AATTCAACGATGCTCTCATTATCAGTGAAGATGCACGCATTGAAGATGCTTTAGCCTACCTA  
AATGAATTTTTCACAAATGTGAAAAATGGGCCATATACAGAGTTAGAGAAGCAACTGACGAA  
CAAATTTCAAGAGAAAGAACCAGAACTGACTGCCCTTTCAAAGATGAATCAAATGAGAAC  
CCCAAGCTGGAAGAGCTTGCTTCCATCCTGGACGAAGCATACCGCTATAACCCACAACTC  
GCACTATTCTCTTTGCCAAGACAAGAGCCTTAGTAGCTGCTTTGAAGAAGTGGATGGAAGC  
AAACCCTCTACTTAGCCACATAAAGCCAGATGCGTTGATGGGTCAGGGAAGAAAAAGACAT  
AAACAGGTATGACCCTGCCAATGCAGAAGGGTGTGCTGGATGCCTTCAAACCGACAAA  
GACAGCAGACTGCTAATTGCTACATCTGTTGCTGATGAAGGCATTGATATTTCTGAGTGCA  
ACCTTGTTGTGCTCTATGAATACTTCGGTAATGTCACCAAAATGATCCAAGTCAGAGGTCGT  
GGAAGGGCAAAGACAGCAAGTGCGTCCTTGTGACAAGCAAAGTGGAAGTGGTTGAGAAT  
GAAAAACAGAACCGTTATAAGGAAGAAATGATGAATGCAGCTATTGAAAACCTGCAGAACT  
GGGATGAAACAACATTTGCAAGAAAGATACGTGGCCTGCAAATGAAGGAAAAGGTATTACG  
AGATTGCAGGAAGAAAGAACTATAAAACATGAAGTAGTGGAAGGGAAAAAAATCTTCTG  
TGTGGAAAATGCAAAGCCTATGCCTGCTGTACAGATGACATCAGAATTATAAAGGACTCTC  
ATCACACTGTCCTAGGAGATGCATTCAAGGAGCGTTATATAATGAAGCCTCACCAGAAACC  
ACGTCCATTTGATGTTTTTGAGAAAAAAGCAAGATGCATTGCCAAAAAACTAATTGCCAGC  
ATGACTGGGGGATCACAGTGAAGTACAAGACATTTGATAATCTACCAATCATCAAATCAGA  
AGCTTTGTAGTAGAGGACATTGAACTGGGACACAGATGGACTTTCAGAAATGGAAAAATA  
TTAATTCTTCTTTGAAGAATTTTGATGAAGAAACATCCAGCTGA

>corvus\_moneduloides-rig1

ATGACGGCGGAGGAGAAGAGGAACCTGCGGTGCTACAGGCGGTACATCGAGAGGAGCCT  
GAACCCCGTGATACATCCTCGGCAACATGACGGACTGGCTGTCCGACGAGGTGAAGGAGA  
GAATCCGAAAGGAGGAGGAGAAGGGGGTGACGGCGGCCGCCGCGCTGTTCCCTGGATGC  
CGTGCTGCTGCTGGAGGCGGAGGGCTGGCTGCGGGGCTTCCTGGATGCTCTGGTTGCCG  
CAGGTTACACTGGACTGGCAGAAGCAATCGAAAACTGGGACTTCAGCAAGCTGGAAAAAC  
TGGAGCTGCCCAGGCAGCTGTTGAAGCGGATAGAAGCAACAATGCTAGAAATTGATCCGG  
TAGCAATCATGCCATACATAAACACGTGCCTGATAGAGAGGGAGTGTGATGAGATCCTGCA  
GATCAGTGAATACAGAAGCAAAGCAGCCGGGATAACTAACTCATTGAATGCCTCTGTCCG  
TCGGATAAGGAAAACCTGGCCCAAAAGTCTTCAGCTGGCATTGGATAATGCAGGGTATTACA  
ATGCAAGTGAACGTGGAATATAACAGAAGATAATGGCGAAGGTGTTGATGGTGAAATAAC  
AGATGCCTCTGAGAATTACTTTGAAACCATTATGACATTTTCTGAAGAAGCAGAATGTGATA  
ATCTCAGTGAAAATCTCTCTTCAGTTTCAGAAAGGGTCTATGAGTCTTCATCTGTTAATGAA

CCAAAGAAGGCTCGGAGCTACCAGATTGAGCTTGCACAGCCTGCCATTGATGGGAAAAAC  
ACATTGATTTGTGCCCCACAGGATCTGGAAAACTTTTGTGGCACTTCTGATTTGTGAGCA  
TCATTTGCAAAACGTTCTTCAGGACGAAAGGCCAAAAGTGGTCTTCCTTGCAACCAAAGTG  
CCAGTGTATGAGCAACAGAAAAATGTATTCAGGCAGCATTTTGAAGAAGTGGATACTCTG  
TTCAGGGAATTTGTGGTGAAACAGTTGCAAATATCTGTGTAGAAAATGTTATACAGGACAGT  
GACATCATTGTGCTAACACCCCAGATTCTTGTGAATAGCATAGAGAAAGGGATCCTTAGCT  
CCCTCTCCATCTTCACTCTGATGATATTTGATGAGTGCCACAACACTACAGGCAACCACCC  
TTACAATGTGTTGATGACCAGATACCTGGATCAAAAATTTGACTCCTCAGGAAACCAGCTG  
CCTCAGATTGTAGGTTTAACTGCTTCTGTTGGAGTTGGTAATGCCAAGAGCATGAATGAAA  
CTGTAGAGCACATCTGTACCCTCTGCTCCTACCTTGACATACAGACCATATCCACTGTCAG  
AGAGAGCAAACAAGATCTGCAGAGGTTTGGAAACAAGCCAGAAACACATATCAGGTGGGT  
TAAAATGCGAGCTCAGAATCACTTTGCAGACATTATCTCAGGTCTGATGTCTGAGACACAG  
GTGTTGATGAGGAAGATTTACTCAGTGGATACCATCTCCCAAATCAACAAGAATTACTTTGG  
GACACAGAGATATGAACACTGGATAGTTTTCACTCAGAAGAAATGCAGACTGCTGCAACTG  
GAAGATAAGGAGAAGGAGAGCAACATTTGTAGAGACCTTTTCATTTGTACTGAACACTTGC  
GGAAATTCAACGACGCTCTCATTATCAGTGAAGATGCCCGCATCGAAGATGCTTTAGCCTA  
CCTAAATGAATTTTTCACAAATGTAAAAAATGGACCATATACAGAGTTAGAGAAGCAACTGA  
CAGACAAATTTCAAGAGAAGGAACCAGAGCTGACTGCCCTTTCAAAGATGAGTCAAATGA  
GAATCCAAAGCTGGAAGAGCTTGCTTGCATCCTGGACGAAGCATACCGCTATAATCCACAG  
ACTCGCACTATTCTCTTTGCCAAGACAAGAGCTTTAGTCGCTGCTTTGAAGAAGTGGATAG  
AAGCAAACCTCTACTTAGCCACATAAAGCCAGATGTGTTGATGGGTAAGGGAAGTAAAGA  
TCATACAACAGGTATGACCCTGCCAATGCAGAAGGGTGTACTGGATGCATTGAGAAATGAC  
AAGGATATCAGACTGCTAATTGCTACATCTGTTGCTGACGAAGGCATTGATATTGCTGAGT  
GCAACCTTGTGGTGCTCTATGAATACTTCGGTAATGTCACCAAATGATCCAAGTGAGAGG  
TCGTGGAAGGGCAAGAGACAGCAAGTGCATCCTTGTGACAAGCAAAGAGAAGTGGTTGA  
GAATGAAAAACAAAACAGTTATAAGGAAGAAATGATGAATGCAGCTATTGAAAAGCTACAGA  
ACTGGGATGAAACAACATTTGCAAGAAAGATACGTGACCTGCAAATGAAGGAAAAGAACT  
ACGAGATTCCAGGAAGAATGAAACAAAATATAAAGTAGTGGAAGGGAAAATAAATCTTTTAT  
GTGGAAAATGCAAAGCATATGCCTGCAGTACAGATGACATCAGAGTTATAAAGGAATCTCA  
TCACACTGTCCTAGGTGATGCATTCAAGGAGCGTTATATAACAAAGCCCCACAGCAAATG  
GTTTCAGTTTGTGTTTTGAGAAAAAAGCAAGATGCATTGCCGAAATACTGACTGCCAGC  
ATGATTGGGGGATTACAGTGAAGTACAAGACATTCGATAACCTACCAGTGATCAAATCAA  
AAGCTTTGTACTAGAGAATGTTGAACTGGGACACAAATGGATTTTCAGAAATGGAGAAGT  
ATTAATTTCTTTTTGAAGAATTTTGATGAAGAAAATGACCTCAACTCAACATTTTAA

>cyanoderma\_ruficeps-rig1

ATGACGGCGGAGGAGAAGCGGAACCTGCAGTGCTACAGGCGGTACATCGAGAGGATCCT  
GAACCCCGTGATACATCCTCAGCAACATGACGGACTGGCTGTCCGACGAGCTGAGGGAGA  
GAGTCCGAAAGGAGGAGGAGAAGGGAGTGACGGCGGCCGCCGCGCTGTTCTTGATGC  
CGTGCTGCTGCTGGAGGCGGAAGGCTGGCTCCGGGGCTTCCTGGATGCCCTGGTTGCAG  
CAGGTTACACTGGACTGGCAGAAGCAATTGAAAATGGGACTTCAGCAAATGGAAAACT  
GGAGCTGCACAGGCAGCTGTTGAAGCGGATAGAAGCAACAATGCTAGAAATTGATCCTGT  
AGCAATCATGCCATACATAAACACATGCCTGATAGAGAGGGAGTGTGATGAGATCCTGCAG  
ATCAGTGAATACAGAAGCAAAGCAGCTGGGATAACTAACTCATTGAATGCCTCTGTGCT  
CGGATAAGGAAAATGGCCCAAAGCCTTCAGCTGGCATTGGATAATGCAGGATATTACAA

TGCAAGTGAAGTGTGGAATATAAGAGAAGATAATGGCAAAGATGTTTCATGGTGAAATGACA  
GATGCCTCTGAGACTCACTTTGAAACCTTGATGACATTTTCTGAAGAAGCAGAATGTGATAA  
TCTCAGTGAAAATCTCTCTTCAGTTTCAGACAGCGTCTATGAGCCTTCATTTGTTTATCAAC  
CGAAGAAGGCTCGGAGCTACCAGATTGAGCTTGACAGCCTGCTATTGATGGCAAAAACA  
CGTTGATTTGTGCCCCCACAGGCTCTGGAAAACTTTTGTGGCACTTCTGATTTGTGAACAT  
CATTTGCAAAACGTTCCCTCTGGGCGAAAGGCCAAAAGTTGTCTTCCTTGCAACCAAAGTGC  
CAGTGTATGAGCAACAGAAAAATGTATTCAGGCAGCATTTTGAAGAAGTGGATACTCCGT  
TCAAGGAATTTGTGGTGAAACAGTTGCAAGTATGTCTGTAGAAAATGTTATACAGGATAGTG  
ACATCATTGTGCTAACGCCACAGATTCTTGTGAATAGCATGGAGAAAGGCATCCTTAGCTC  
CCTCTCCATCTTCACTCTGATGATATTTGATGAGTGCCACAACACTACAGGCAACCACCCC  
TACAATGTGTTGATGGCCAGATACCTGGATCAAAAATTTGACTCCTCTGCAAACCAAGCTGC  
CCCAGATTGTAGGTTTAACTGCTTCTGTTGGAGTTGGTAATGCCAAGAGCACTAATGAAAC  
TGTAAGACACATCTGTAATCTCTGCTCCTACCTTGACATACAGGCCATATCCACTGTCAGA  
GAGAACAACAAGATCTGCAGAGGTTTGGAAACAAGCCAGAAACACATATCAGATGGGTTA  
AAATGCAAGCTCGGAATCACTTTGCAGACATTATCTCAGGACTGATGTCTGAGACAGAGCT  
GTTGATGAAGAGGACTTATTCATTGGATAACATCTCCCAAATCAACAAGAATTACTTTGGAA  
CACAGAGATATGAACACTGGATAGTTTCCACTCAGAGGAAATGCAGACTGTTGCAACTGGA  
AGATAAGGAGGAGGAGAGCAATATTTGTAGACACATTTTCATTTGTACGGAACATTTGCGG  
AAGTTCAACGATGCTCTCATTATCAGTGAAGATGCTCGCATCGAAGATGCTTTAGCCTACCT  
AAATGAATTTTTCACAAATGTGAAAAATGGACCATATACAGAGTTAGAGAAGCAACTGACGG  
AGAAATTTCAAGAGAAAGAACAAGAGCTGACTGCCCTTTCAAAGATGAGTCAAATGAGAA  
TCCAAAGTTGGAAGAGCTCACTTGCATCCTGGATGAGGCATACCGCTATAACCCAGAGACT  
CGCACTATTCTCTTTGCCAAGACAAGAGCCTTAGTAGCTGCTTTGAAGAAGTGGATAGAAG  
CAAACCTGTACTTAGCCACATAAAGACAGATGTGTTGATGGGTAAGGGCAGAAGAGATCA  
TAAACAGGTATGACCCTGCCAATGCAGAAGGGTGTACTGGATGCATTAGAAATGACAAA  
GACATCAGACTGCTAATTGCTACATCTGTTGCTGACGAAGGCATTGATATTAGTGAGTGCA  
ACCTTGTGGTTCTCTATGAATACTTTGGAATGTACCAAAAATGATCCAAGTCAGAGGTCGC  
GGAAGGGCAAAGACAGCAAGTGCATCCTTGTGACAAGCAAAACAGAAGTGGTTGAGAAT  
GAAAAACGAACTGTTACAAGGAAGAAATGATGAATGCGGCTATCGAAAAGCTACAGAACT  
GGGATGAAACAACATTTGCAAGAACGATACATCAGCTGCAAATTAAGGAAAAGACACTACG  
AGATTCCAGGAAGAAAGAAACAAAACATAAAGTAGTGGAAGGGGAAAAAAACCTTTTGTGT  
GGAAAATGCAAAGCATATGTCTGCAGTACAGATGACATCAGAATTATAAAGGAATCTCATCA  
CACTGTCCTAGGTGATGCGTTCAAGGAGCGTTATATAACAAAGCCCCACAGGAAACCGGTT  
CAGTTTGATGGTTTTGAGAAAAAAGCAAGATGCATTGCCGAAATACTGAGTGCCAGCATG  
ACTGGGGGATCACAGTGAAGTACAAGACATTTGATAATCTACCACTGATCAAAATCAAAG  
CTTTGTACTAGAGAATGTTGAAACTAGGACACAAATGGATTTTCAGAAATGGAAAAGTATTA  
ATTTGTCTTTGAAGAATTTTGTGATGAAGAAACATCCAGCTGA

>dendrocopos\_noguchii-rig1

ATGACCGCGGAGGAGAAGAGGAGCCTGCAGTGCTACAGGCGGTACATCGAGAAGAGCCT  
GAATCCCGTCTACATCCTGAGCAACATGACGGACTGGCTGTCGGATGAGGTGAAGGAGAG  
AGTCCGGAAGGAGGAGGAGAAGGGAGTGACAGCGGCTGCTGCGATGTTCTGGATGTCA  
TCTTGAGCTGGAGGAGGAGCGATGGCTCCGGGGCTTCATAGACGCCCTGGTCGCAGCA  
GGTTACACTGGGCTGGCAGAAGCCATTGAAAACCTGGGACTTCAGCAAACCTGGAGAACTG  
GAGCTGCACAGGGAGCTGCTGAAGAGGATAGAAGCCACAATGCTAGAAGTCGACCCAGTG

ATGGTCATGCCTTACATAAACACATGCTTGATAGAAAGGGAGTGTGATGAGATCCTGCAGA  
TCAGTGAGTACAGGAGCAAAGCAGCCGGGATAACGAAGCTCATTGAGTGTCTCTGCCGCT  
CGGACAAAGAAAACCTGGCCCAAGAGCCTCCAGCTGGCACTGGACAATGCAGGCTATTACA  
ATGCAAGTGAGCTGTGGGATATGAGAGAAGAGAATTTCAAGGATTTTGATGGTGAAGTGGG  
GGATGCCTCTGAGAACAGCTTTGAAGCCATGGTGACGTTTTCTGAAGAAGTGGAATGTGAT  
AATTTTCAGTGAAAATCTCTCTTCAGCTTCAGGAGGGACTAATGAGCCTCCAGCTGTGTATG  
AGGCAAAGAAAAGCTCGGAGCTACCAGGTTGAACTTGACACAGCCTGCAATCAACGGGAAAA  
ATACCCTGATATGTGCTCCACAGGATCTGGAAAAACCTTTGTGGCCCTTCTGATCTGTGA  
ACACCACCTGCAAAACGTGCCCCCGGGACGGAAGGCGAAAATTGTCTTCCTGGCAACCAA  
AGTGCCAGTGTATGAGCAGCAGCAAAATGTGTTTCAGGCAGCATTTTGAAAGGCAGGGGTA  
CTCTGTTTCGAGGGATCTGTGGTGAGACAGTTGCCAACATCCCTGTAGAAAACGTGATCGG  
GGACAGCGACATCATCGTGCTGACGCCCCAGATTCTGGTCAACTGCTTCAAGCAAGGCAT  
CCTCACCTCCCTCTCTGTCTTCACCCTGATGATATTTGATGAGTGCCACAACACCACGGGC  
AACCACCCTTACAATGTGTTAATGACCAGATACCTGGAGCAAAAATTTGACTCCTCTGCAAG  
CCAGCTGCCCCAGATTGTAGGTTTAACTGCTTCTGTTGGAGTTGGTAATGCCAAGAGCATC  
AAGGAAGCAATAGAGCACATCTGTACCCTCTGCTGCTACCTTGACATACAGACCATATCCA  
CTGTCAGAGAGAACAAGAGGATCTGCAGAGGTTTGGAAACCATGCCAGAAACACATGTCA  
GGTGGGTTAAAAAGCGAGCTCAGAATTGCTTTGCAGACATCGTCTCAGGTCTGATGTCTGA  
GACAGAGGCGCTGATGAGGAGGATTTACTCAGTGGATACTATCTCCCAAATCAGCAAGAAT  
GATTTTGGAACACAGAGGTATGAGCAGTGGATAGTCACCACGCAGAAGAAATGCAGGCTG  
CTGCAGCTGCCAGATAAGGAGAAGGAGAGCAGTGTCTGCAGAGACCTCTTCATCTGCACT  
GAACACCTGCGTAAGTTCAACGACGCCCTCATGATCGGTGAAGACGCTCGCATTGAGGAT  
GCTCTGGCCTACCTGACTGAGTTTTTCACAAATGTCAGGAATGGACCCTACACACAGCTGG  
AGAAGAGACTCACAGCCAGGTTTCAAGAGAAAGAGGCAGAACTGACTGCCCTTTCAAAAAG  
ATGAATCCAGTGAGAACCCCAAGCTGGAAGAGCTTGCTTGCATCCTGGATGAAGCATACC  
GCTACAACCTCAGACACTCGCACTCTTCTCTTTGCCAAGACGAGAGCCTTAGTAGCTGCTTT  
GAAGAAGTGGATAGAGGCAAACCCTCTGCTGAGCCATGTAAAGCCAGGTGTGTTGATGGG  
TCATGGAAGAAGAGACCAAAAAACAGGTATGACCCTCCCAATGCAGAAGGTGATACTGGAT  
GCATTCAGAACCAACAAGGACTGCAGACTGCTGATTGCTACATCTGTTGCTGATGAAGGCA  
TTGACATTTCTGAGTGCAGCCTCGTTGTGCTCTATGAGTACTTTGGCAATGTCACCAAAAATG  
ATCCAAGTCAGAGGTCGTGGAAGGGCAAGGGACAGCAAAATGCATCCTTGTGACAAGCAAA  
ACAGAAGTGGTTGAGAATGAGAAACACAACCATTACAAGGAAGAAATGATGAATGAAGCTG  
TTGAGCAGCTGCAGAACTGGGATGAAGCAGCATTTGCAAGGAAGATACATATCCTGCAAAAT  
GAAGGAGAAGGTGTTACGAGACTTCAAGAAGAAAGAAACAAGACCTCAGCTAGTGGAAGG  
GAAAAAAAATCTCCTGTGTGGAATAATGCAAAGCTTATGCCTGCAGTACAGATGATATCAGA  
GTTATAAAGGTATCTCATCACACTGTCCTGGGAGATGCATTCAGGGAGCGTTATGTAACAA  
AGCCCCACCACAAACCAATGAAGTTTGACTGTTTTGAGAAGAAAAGCAAGATGCACTGCAA  
AAACAGCAACTGCCACCACGACTGGGGCATCACAGTGAAGTACAAGATGTATGACAACCT  
GCCTGTGATCAAAATCAAGAGCTTTGTGGTGGAGAACGTTGAGACTGGGAGACAAATGGA  
CTTCCAGAAGTGGAAGAACATCAATTTTTCTCTGAAGAACTTTGATGATGAAGAAATGTCCA  
TCTGA

>diphylloides\_magnificus-rig1

ATGACGGCGGACGAGAAGAGGAACCTGCGGTGCTACAGGCGGTACATCGAGAGGAGCCT  
GAACCCCGTGATACATCCTCGGCAACATGACGGACTGGCTGTCCGACGAGGTGAAGGAGA

GAGTCCGAAAGGAGGAGGAGAAGGGGGTGACGGCGGCCGCCGCGCTGTTCTGGATGC  
CGTGCTGCTGCTGGAGGCGGAGGGCTGGCTGCGGGGCTTCCTGGATGCCCTGGTTGCCG  
CAGGTTACACTGGACTGGCAGAAGCAATTGAAAAGTGGGACTTCAGCAAGCTGGAAAACT  
GGAGCTGCACAGGCAGCTGTTGAAGCGGATAGAAGCAACAATGCTAGAAATTGATCCAAT  
AGCAATCATGCCATACATAAACACATGCCTGATAGAGAGGGAGTGTGATGAGATCCTGCAG  
ATCAGTGAATACAGAAGCAAAGCAGCCGGGATAACTAACTCATTGAATGCCTCTGTCTGCT  
CGGACAAAGAAAACTGGCCCCAAAAGTCTTCAGCTGGCATTGGATAATGCAGGGTATTACAA  
TGCAAGTGAAGTGTGGAATATAAGAGAAGTTAACGGCAAAGATATTGATGATGAAATAACA  
GGTGCCTCTGAGAATTGCTTTGAAACCGTGGTGACATTTTCTGAAGAAGCAGAATGTGATA  
ATCTCAGTGAATCTCTCTTCAGCTTCAGAAAGGGTCTGTGAGTCTTCATCTGTTTATGAA  
CCAAAGAAGGCTCGGAGCTACCAGATTGAGCTTGACAGCCTGCAATTGATGGGAAAAAC  
ACATTGATTTGTGCCCCACAGGATCTGGAAAACTTTTGTGGCACTTCTGATTTGTGAACA  
TCATTTGCAAACATTCTTCAGGACGAAAGGCCAAAAGTTGTCTTCCTTGCAACCAAAGTGC  
CAGTATATGAGCAACAGAAAAATGTATTCAGGCAGCATTTTGAAGAAGTGGATACTCTGTT  
CAGGGAATTTGTGGTGAACAGTTGCAAATATCTGTGTAGAAAATGTTATACAGGACAGCG  
ACATCATTGTGCTAACGCCCCAGATTCTTGTGAATAGCATGGAGAAAGGGATCCTTAGCTC  
CCTCTCCATCTTCACTCTGATGATATTTGATGAGTGCCACAACACTACAGGCAACCACCCTT  
ACAATGTGTTGATGACCAGATACCTGGATCAAAAATTTGACTCCTCTGCAAACCAGCTGCC  
TCAGATTGTAGGTTTAACTGCTTCTGTTGGAGTTGGTAATGCCAAGAGCATCAATGAACTG  
TAGAGCACATCTGTACCCTCTGCTCCTACCTTGACATACAGGCCATATCCACTGTCAGAGA  
GAACAAACAAGATCTGCAGAGGTTCCGAAATAAGCCAGAAACACATATCAGATGGGTTAAA  
ATGCGAGCTCAGAATCGCTTTGCAGACATTATCTCAGGTCTGATGTCTGAGACAGAGGTGT  
TGATGAGGAAGATTTACCCAGTGGATACCGTCTCTCAAATCAACAAGAATTACTTTGGGAC  
ACAGAGATATGAACACTGGATAGTTTTCACTCAGAAGAAATGCAGACTGCTGCAACTGGAA  
GATAAGGAGAAGGAGAGCAACATTTGTAGAGACCTTTTCATTTGTAAGTGAACACTTGCGGA  
AATTCAACGACGCTCTCATTATCAGTGAAGATGCCCGCATTGAAGATGCTTTAGCCTACCTA  
AATGAATTTTTACAAATGTAAAAAATGGACCATATACAGAGTTAGAGAAGCAACTGACGGA  
CAAATTTCAAGAGAAAGAACCAGAGCTGACTGCCCTTTCAAAGATGAGTCAAATGAGAAT  
CCAAAGCTGGAAGAGCTTGCTTGATCCTTGACGAAGCATACCGCTATAACCCACAGACT  
CGCACTATTCTCTTTGCCAAGACGAGAGCCTTAGTAGCCGCTTTGAAGAAGTGGATACAAG  
CAAACCTCTACTTAGCCACATAAAGCCAGATGTGTTGATGGGTAAGGGAAGTAAAGATCA  
TAAACAGGTATGACTCTGCCAATGCAGAAGGGTGTACTGGATGCATTCAGGAATGACAAA  
GACATCAGACTGCTAATTGCTACATCTGTTGCTGACGAAGGCATTGATATTACCGAGTGCA  
ACCTTGTTGGTGCTCTATGAATACTTCGGTAATGTCACCAAAATGATCCAAGTCAGAGGTG  
TGGAAGGGCAAGAGACAGCAAGTGCATCCTTGTCAGCAAGCAAAGAGAAGTGGTTGAGAA  
TGAAAAACAAAACAGTTATAAGGAAGAAATGATGAATGCAGCTATTGAAAAGCTACAGAACT  
GGGATGAAACAACATTTGCAAGAAAGATACGTGACCTGCAAATGAAGGAAAAGAACTGCG  
AGATTCCAGGAAGAACGAAACAAAACATAAAGTAGTGGAAGGGAAAATAAATCTTTTGTGT  
GGAAAATGCAAAGCATATGCCTGCAGTACAGATGACATCAGAGTTATAAAGGAATCTCATC  
ACACTGTCCTAGGTGACGCATTCAAGGAGCGTTATATAACAAAGCCCCACAGCAAATGCT  
TCAGTTTGATGGTTTTGAGAAAAAAGCAAGATGCATTGCCGAAATACTGACTGCCAGCAT  
GACTGGGGGATCACAGTGAAGTACAAGACATTTGATAATCTACCAGTGATCAAAATCAAAA  
GCTTTGTACTAGAGAATGTTGAACTGGGACACAAATGGATTTTCAGAAATGGAGAAGTATT  
AATTTCTCTTTGAAGAATTTTGATGAAGAAAATGAGCTGAACTCAACATTTTAA

>dromaius\_novaehollandiae-rig1

ATGACGGCGGAGGAGAAGCGGGGCCTGCAGTGCTACCGGCGGCTCATCGAGAGCACCCCT  
GAACCCCGTGTACATCCTGGGCAACATGACGGACTGGCTGGCGGATGTGGTCAGAGAGA  
GGATTCAGAAGGAGGAGGAGAAGGGGGTGACGGCGGCCGCCGCGCTGTTCCCTCGACGT  
CATCCTGCAGCTCGAGGCCCGGGGCTGGTTCAGGGGCTTCCTCAACGCGCTGGTGGCGG  
CAGGTTACACTGGGCTGGCAGAAGCAATTGAAAACCTGGGACTTCAGAAAACCTGGAAAACT  
GGAGTTACACAGACAGCTGCTGAAGCGGATAGAAGCCACAATGATAGAAATTGATCCAGTA  
GTGCTGATCCCCTACATAAACACATGCCTGATAGACAGGGAGTGTGAGGAGATTCTGCAG  
ATTAGCGAACACAGGAGCAAACCAGCAGGCATAACTAACTCATTGAATGTCTCTGTCTGAT  
CAGATAAGGAAAACCTGGCCCAAAAGCCTGCAGCTAGCACTAGATAATACAGGATATTACCG  
TGCAAGTGAACCTATGGGATATGACAGAAGATAATGGCAAAGATACTGATAGTGAATGATG  
GAGACTTCTGAGGACAGCTTTGAAACTAGTATAACGTATTCTGAAGAAGGAGAATGTGATA  
ATAATCTCAGTGAAAATCTCTGTTTCAGCTGCAGAAGTGATTGAGCAGTCTCCACCTATTTAT  
GAACCAAAGAAGCCTCGAAGTTATCAAATTGAGCTTGCACAGCCTGCTATCAATGGGAAAA  
ATACAATAATATGTGCCCCCACTGGCTCTGGGAAAACCTTTGTGGCGCTTCTGATTTGTGA  
ACACCATCTCCAAAACATGCCTGTGGGACGAAAGGGAAAGGTTGTCTTTCTAGCAACTAAA  
GTCCCAGTGTATGAGCAACAAAAAACTGTTTTCAAGCACCATTTTGAAAGAAGTAGATACTC  
CGTTGAAGGAATTAGTGGTGAAACCGTTGCACGTGTCTCTGTAGCAAAGGTTATACAGGAC  
AGTGACATCATCATACTGACCCCCCAGATCCTCGTGAATAGCTTTCAGGACGGGACCCTTA  
GCTCTCTCTCTGTTTTCACTCTGATGATATTTGATGAGTGCCACAACACCACGGGCAACCA  
CCCTTACAACGTGTTAATGACTAAATATCTGGAACAAAAATTTGACTCCTCTGCACATCAGC  
TGCCTCAGATTATAGGTTTAACTGCCTCCATTGGAGTCGGTAGCGCCAAAAACACCGAAGA  
GGTGATAGAGCATATCTGTACGCTGTGCTCCTACCTGGACATACAGACCATATCCACTGTC  
AGAGAGAACGTAGAGGATCTGCAGAGCATCGTATACAAGCCTGAAATAGATGTCAGACAG  
GTTAAAATGCGACTTCAAATCGTTTTGTGGACATTATCTCAAATTTGATGGCTGAGACAGA  
GGCACTGATGAGAACGATTTACTCAGTGGACACTGTCTCCCAGGTTGCTTGAATAATTTT  
GGAACACAGAAATATGAACACTGGATAGTTAAAACCTCAGAAGAAATGCAAACCTGTTGCAAC  
TAGCTGATAAGGAGGAGGAGAGCAGGATTTGTAGAGCCCTTTTCATTTGACTGAACACCT  
GAGGAAATTCAATGATGCCCTCATCATCTGTGAAGATGCCCGCATCCAAGATGCTTTAGCC  
TACCTAACAGAATTTTTCACAAATGTTAAAAATGGACCATTACAGAGCTAGAGCAGTGCCT  
GACAGCCAAATTTCAAGATAAAGAAGAGGAGCTGATTGCCCTTTCAAAGATGAATCAAAC  
GAGAATCCTAAACTGGAAGAGCTTGCCAGCATCTTGGATGACACATACCGCTATAACCCAG  
AGACCCGCACTCTTCTCTTTGCTAAGACAAGAGCCTTAGTAGCTGCTTTGAAGAAGTGGGT  
AGAAGAAAATCCTCTACTTAATAGCTACATAAAGCCAGATGTTTTGATGGGGCGTGGAAGA  
ACAATCAGAAAACAGGTATGACCCTCCCAAGCCAGAAGGGTGTATTGGATGCTTTCAAAA  
CCAATAAGGACAGCAAGCTGCTAATTGCTACATCTGTTGCTGATGAGGGCATTGATATTGC  
CCAGTGCAACCTTGTTGTGCTCTATGAATACTACGGCAATGTCATCAAATGATCCAAGTCA  
GAGGTCGTGGAAGGGCAAGAGACAGCAAGTGCATCCTTGTGACAAACAAAAGAGAAGTCG  
TTGAGTATGAGAAATACAACCGTTACAAGGAAGAAATGATGAATGAAGCTATTGGAAAGCT  
CCAGACATGGGATGAGGCAACATTTGCAAGAAAGATATATAACCTGCAAATGAAGGAAAAG  
GTATTACGAGATTCCAAGAAGAAAGATACAAGACCAAAGGTAATGGAAGGCCAAAAAAATC  
TCCTGTGTGGAAAATGCAAATCATATGCTTGCAATACAGACGACATCAGAGTTATAAAGGAA  
TCTCATCACTGTTCTTACCGAAGCATTCAAGGAGCGTTACATAACAAAGCTTCATGAGAA  
ACCAGTCCAGTTTGATGATTTTATGAAAAAAGCAAGATGTATTGCAAGAATACTAATTGCC

AGCATGACTGGGGAATCATAGTGAAGTACAAGACGTTTGATAACCTACCAGTGATCAAAAT  
CAAAAGCTTTGTAGTGGAGGATGTTGCAACCGGGACTCAAATGGATTTTCAGAAATGGAGA  
AATGTTAATTATTCTTTCAAATTTTTGATGTTGAAGAAATGTCCAGCTGA

>egretta\_garzetta-rig1

ATGACCGCGGAGGAGAAGAGGAGCCTGCAGTGCTACCGGCGGTACATCGAGAGGAGCCT  
GAACCCCGTCTACATCCTGGGGAACATGgCGGACTGGCTGTCCGACGAGGTGAAGGAGA  
GGGTCCGGAAGGAGGAGGAGAAGGGGGTGACGGCGGCCCGCGCTGTTTCTGGATGC  
CGTCCTGCAGCTGGAGGCGGAAGGCTGGCTGCGGGGCTTCCTGGACGCCCTGGTTGCAA  
CAGGTTACACTGGACTGGCAGAAGCAATTGAAAACCTGGGACTTCAGCAAACCTGGAAAACT  
GGAGTTGCACAGACAGCTGTTGAAGCGGATAGAAGCAACAATGCTAGAAGTTGATCCAGT  
AGCACTCATGCCCTACATAAACACATGCCTGATAGAGAGGGAGTGTGATGAGATCCTGCA  
GATCAGTGAATACAGAAGCAAAGCAGCTGGGATAACTAACTCATTGAATGTCTCTGTCTGA  
TCGGATAAGGAAAATTGGCCGAAAAGCCTTCAGCTAGCACTAGATAACACAGGATATTACA  
ATGCAAGTGAAGTGTGGGATATGAAAGGAGATAATGGCAAAGATGTTGATGGTGAAATGAC  
AGATGCCTCGGAGAACAGCTTTGAACTGTGATAACATTTTCTGAAGAAGCAGAATGTGAT  
AATAATCTCACTGAAAATCTCTATCCAGTTTCAGAAGGGATCTATCAGTCTTCACCAGTTTAT  
GAAACAAAGAAGGCTCGGAGCTACCAGACTGAACTTGCGCAGCCTGCTGTGATGGGAAA  
AACACATTGATATGTGCCCCACAGGATCTGGAAAACTTTTGTGGCACTTCTGATTTGTGA  
ACACCATTTCCAAAACATGCCCGTGGGACGAAAGGCGAAAGTTGTCTTTCTTGCAACTAAA  
GTGCCAGTGTATGAACAACAGAAAACCTGTATTCAAGCAGCATTTTGAAAGAAGTGATATTC  
TGTTCAAGGACTTAGCGGTGAAACAGTTGCAAATGTCTCTGTAGAAAGGGTTATACAGGAC  
AGTGACATCATTGTGCTGACGCCCCAGATTCTTGTGAATAGCATCGAGGAAGGGATCATT  
GCTCCCTCTCCATCTTCACTCTGATGATATTTGATGAATGCCACAACACTACAGGCAACCAC  
CCTTACAATGTGTTAATGACCAGATACCTGGAACAAAAATTTGATTCTCTGCAAACCAGCT  
GCCTCAGATTGTAGGTTTAACTGCTTCTGTTGGAGTTGGTAATGCCAAGAGCATCAAGGAA  
ACAATAGAGCACATCTGTACCCTCTGCTCCTACCTTGACATACAGGCCATATCCACTGTCA  
GAGAGAACAAAGAGGATCTGCAGAGATTTCGAAACAAGCCAGAAACATATGTCAGATGGG  
TTAAACGCGAGTTTCAAGATCATTTTGCAGACATTATCTCGGGTCTGATGTCTGAAACGGA  
GGTGTGATGAGGAAGATTTACTCAGTGGATACTATGCCTCAAATCAACAAGAATGATTTTG  
GAACACAGAAATATGAACATTGGATAGTTGGCACTCAGAAGAAATGCAAACCTGTTGCAACT  
GGCAGATAAGGAGAAGGAGAGCAGGATTTGTAGAGACCTTTTTCATTTGCACTGAACACCTG  
CGGAAATTCAACGATGCTCTCATCATCAGTGAAGATGCCCGCATCGAAGATGCTTTAGCCT  
ACCTAACTGAATTTTTACGAATGTCAAAAATGGACCATATACAGAGTTAGAGAAGCAAATG  
ACAGCCAAATTTCAAGAGAAAGAACCAGAAATGACTGCCCTTTCAAAGATGAATCAAATGA  
GAATCCCAAGCTGGAAGAGCTTGCTTGCATCCTGGATGAAGCATAACCGCTATAACCCACAG  
ACTCGCACTATTCTCTTTGCTAAGACAAGATCCTTAGTATCTGCTTTGAAGAAGTGGATAGA  
AACAAACCCTCTACTTAGCCACATAAAGCCAGGTGTGTTGATGGGTCGTGGAAGAAGAGAT  
GAAAAACAGGTATGACCCTCCCGATGCAGAAGGGTGTACTGGATGCATTCAAACCAACA  
AAGACAGCAGACTGCTAATTGCTACATCTGTTGCTGATGAAGGCATTGATATTTCTGAGTG  
CAACCTTGTTGTGCTCTATGAATACTTTGGCAATGTCACCAAATGATCCAAGTCAGAGGTC  
GTGGAAGGGCGAAAGACAGCAAGTGCATCCTCGTGACAAGCAAATCAGAAGTGGTTGAGA  
ATGAGAAACACAACCGTTATAAGGAAGAAATGATGAATGAAGCTATTGAAAAGCTACAGAAT  
TGGGATGAAACAACATTTGCAAGAAAGATACATGACTTGCAAATGAAGGAAAAGGTATTAC  
GAGATTCAAGGAACAAGGAAACAAAACGTAAGGTAGTGGAAGGGAAAATAAATCTTCTGTG



TGGAAAATGCAAAGTATATGCCTGCAGTACAGATGACATCAGAGTTATAAAGGAATCTCATC  
ACACTGTCCTAGGAGATGCGTTCAAGGAGCGTTATATAACAAAACCTCATAAGAAACCCAT  
CCAGTTTGATGGTTTTGAGAAAAAAGCAAGATGCATTGCCAAAATACTAATTGCCAGCATG  
ACTGGGGAATCGTAGTGAAGTACAAGACATTTGATAATCTACCAAGTATCAAAATCAAAAG  
CTTTGTAGTAGAGAACGTTGAAACTGGGACACAAATGGATTTGCAGAAATGGAAAAAATTA  
ATTTTTCTCTGAAGAATTTTGATGTTGAAGAAACATCCAGCTGA

>empidonax\_trailii-rig1

ATGACGGCGGAGGAGAAGAGAAACCTGCAGTGCTACAGGCGGTACATCGAGAGGATCCT  
AAACCCCGTCTACATTCTGAGCAACATGACGGACTGGCTGTCGGACGAGATGAAGGAGAG  
AGTGCGGAAGGAGGAGGAGAAGGGGGTGACGGCGGCCGCCGCGCTGTTCTGGATACC  
GTGCTGCTGCTGGAGGCGGAAGGCTGGCTCCGGGGCTTCCTGGATGCCCTTGTTGCAGT  
AGGTTACACTGGACTGGCAGAAGCAATAGAAAACCTGGGACTTCAGCAAACCTGGAAAACTG  
GAGCTGCACAGACAGCTGTTGAAGCGGATAGAAGCAACAATGCTAGAAATTGATCCAGTA  
GCACTCATGCCTTACATAAACACATGCCTGATAGAGAGGGAGTGTGATGAGATCCTGCAGA  
TTAGTGAATACAGAAGCAAAGCAGCTGGGATAACTAACTCATTGAATGTCTCTGTGCTC  
GGATAAGGAAAACTGGCCGAAAAGTCTTCAGCTGGCATTGGATGAGGCAGGATATTACAG  
TGCAAGTGAACGTGTTGAGGATTTAAGAGAAGATAATGGCAAAGATGTTGATGGTGAATGACA  
GGTGCCTCTGAGAACTGCTTGGAACACGATGACATTTGCTGAAGAAGCAGAGTGTGATA  
ATAATTTCAGTGAAAATCTTTCTTCAGTTTCAGGAATGGTCCATCAGCCTTCAACTGTTTATG  
AACCAAAGAAGGCTCGGACCTACCAGATTGAACCTGCACAGCCTGCTATTGATGGGAAAAA  
CACATTGATATGTGCCCCTACAGGATCCGGAAAAACCTTTGTATCTCTTCTGATTTGTGAAC  
ACCATTTGCAAAATGTGCCCTCAGGACAAAAGGCCAAAAGTTGCCCTTCTTGCAACCAAATT  
GCCAGTGTATGAACAACAGAAAAACGTATTCAGGCAGCATTTTGAAAGAAGTGGATATTCT  
GTTCAAGGAATATGTGGTGAACAGTTGCAAATGTCTCTGTAGAACACGTTATACAGGACA  
GTGACATCATTGTGCTCACGCCCCAGATTCTTGTAATAGCATCGAGACTGGGATCCTTAG  
CTCTCTCTGCATCTTCACTCTGATGATATTTGATGAGTGTGACAATACCACAGGCAACCACC  
CTTACAATGTGTTAATGACCAGATACCTGGAACAAAAATTTGGCTCCTCTGCAAACTCACTG  
CCTCAGATTGTAGGTTTAACTGCTTCTGTTGGAGTTGGGAATGCCAAGACCATCAAGGAAA  
CGATAGAGCACATATGTACCCTTTGTTCTGCTTGACATACAGGCCATATCCACTGTCAG  
AGAGAACAAAGAGGACCTACAGAGATTTGTAAACAAGCCAGAAACACATGTCAGATGGGTT  
AAAATGCGAGCTCAGAATCACTTTGCAGACATTATCTCAGGTCTGATGTCTGAGACAGAGG  
CGTTGATGAGGAAGATTTACTCAGAGGATACTATCTCCCAAACCAACAAGAATTATTTTGA  
ACACAGAAATATGAACAGTGGATAGTTCACACTCAGAAGAAATGCAGACTGTTGCAGCTGG  
CAGATAAGGAGAAGGAGAGCAACATTTGTAGAGACCTTTTCATTTGTACCGAGCACTTGCG  
GAAATTCAACGACGCTCTCATTATCAGTGAAGATGCACGCATCGAAGATGCTTTAGCCTAC  
CTAAAGGAATTTTTCGCAAATGTGAAAAATGGACCATATACAGAGCTAGAGAAGCAACTGA  
CGGACAAATTTCAAGAGAAAGAACCAGAAGTACTGCCCTTTCAAAGATGAATCAAATGA  
GAATCCCAAGCTGGAAGAGCTTGCTTCCATCCTGGACGAAGCATAACCGCTACAACCCACA  
AACTCGCACTATTCTCTTTGCCAAGACAAGAGCCTTAGTAGCTGCTTTGAAGAAGTGGATG  
GAAGCAAACCTCTGCTTAGCCACGTAAAGCCAAATGTGTTGATGGGTGAGGGAAGAAAA  
GAATATAAAACAGGTATGACCCTGCCAATGCAGAAGGTGGTGCTGGATGCATTCAAACCG  
ACAAAGAAAGCAGACTACTAATTGCTACATCTGTTGCTGATGAAGGCATTGACATTTCTGAG  
TGCAACCTTGTTGTGCTCTATGAATACTTTGGTAACGTCACCAAAGCAATCCAAGTCAGAG  
GTCGTGGAAGGGCAAGAGACAGCAAGTGTATCCTTGTGACAAGCAAGATAGAAGTGGTTG

AGAATGAAAAACAGAACCATTATAAAGAAGAAATGATGAATGCAGCTATTGAAAACCTGCAG  
AACTGGGATGAAACAACATTTGCAAGAAAGATACGTGACCTGCAAATGAAGGAAAAAGTAT  
TACGAGATTGTAGGAAGAAAGAACTAAAAAACTCGAAGTCGTGGAAGGGAAAAAAATCT  
TCTGTGTGAAAAATGCAAAGCCTATGCCTGCTGTACAGATGACATCAGAATTATAAAGGAC  
TCTCACCACACTGTCCTAGGAGATGCATTCAAGGAGCGTTATATAACAAAGTCTCACCAGA  
AACCACAACAATTTGATGGTTTTGAGAAAAAAAGCAAGATACATTGCCAAAAAACTATCTGC  
CAGCATGACTGGGGGATCACAGTAAAGTACAAGACATTTGATAATCTACCAATCATCAAAAT  
CAGAAGCTTTGTAGTAGAGGATGTTGAAACTGGGACACAAATGGATTTTCAGAAATGGAAA  
GGTATTAATTCTTCTTTGAAGAGTTTTGATGAAGAAACATCCAGCTGA

>eopsaltria\_australis-rig1

ATGACGGCGGAGGAGAAGCAGAATCTGCGCTGCTACAGGCGGTACATCGAGAGGAGCCT  
GAACCCCGTGTACATCCTCGGCAACATGACGGACTGGCTGTCCGACGAGCTGAAGGAGA  
GGGTCCGGAAGGAGGAGGAGAAGGGGGTGACGGCGGCCGCCGCGCTATTCTGGATGC  
CGTGCTGCTGCTGGAGGCGGAGGGCTGGCTCCGGGGCTTCCTGGATGCGCTGTTTGCAG  
CAGGTTACACTGGGCTGGCAGAAGCAATAGAGAACTGGGACTTCAGCAAACCTGGAAAAAC  
TGGAGCTGCACCGGCAGCTGTTGAAGCGGATAGAAGCAACAATGCTAGAAGTTGACCCAG  
TAGTTATCATGCCTTACATAAACTCATGCCTGATAGAGAGGGAGTGTGATGAGATCCTGCA  
GATCAGTGAATACAGAAGCAAAGCAGCCGGGATAACCAAACCTCATTGAATGCCTCTGTGCG  
TCGGATAAGGAAAACTGGCCCAAAAGTCTTCAGCTGGCTTTGGATAATGCAGGGTATTACA  
ATGCAAGTGACCTGTGGAATATAAGAGAAGATAATGGCAAAGATGTTGATGGTGAAATGAC  
AGATACCCCTGAGAATTACTTTGAAACCATGATGACATTTTCTGAAGAAGGAGAATGTGATA  
ATCTCAGTGAAAATCTCTCTTCAGTTTCAGAAAGCGCCTATGAGTCTTCATCTGTTTATGAA  
CCAAAGAAGGCTCGGAGCTACCAGATTGAGCTTGACAGCCTGCTATTGATGGGAAAAAC  
ACATTGATTTGTGCACCCACAGGATCTGGA AAAACCTTTGTGGCACTTCTGATTTGTGAGC  
ATCATTGCAAACGTTCCCTCAGGACAAAAGGCGAAAGTTGTCTTCCTTGCAACTAAAGT  
GCCAGTGTATGAGCAACAGAAAAATGTGTTTCAGGCAGCATTTTGAAGAAGTGGATACTCT  
GTTCAAGGAATTTGTGGTGAAACAGTTGCAAATATCTCTGTGCGAAAATGTTATACAGGACAG  
TGACATCATTGTGCTGACGCCCCAGATTCTTGTAATAGCATGGAGAAAGGAATCCTTAGC  
TCCCTCTCTGTCTTCACTCTGATGATATTTGATGAGTGCCACAACACCACAGGCCAACCACC  
CTTACAATGTGTTGATGACCAGATACCTGGACCAAAAATTTGATTCTTCTGCAAACCAGCTG  
CCTCAGATTGTAGGTTTAACTGCTTCTGTTGGAGTTGGTAGTGCCAAGAGCATCAAAGAAA  
CTGTACAGCACATCTGTACCCTCTGCTCCTACCTTGACATACAGGCCATATCCACTGTCAG  
AGAGAACAAACAAGACCTGCAGAGATTTGGAAACAAGCCAGAAACACATATCAGATGGGTT  
AAAATGCGAGCTCAGAATCACTTTGCAGACATTATCTCAGATCTGATGTCGGAGACAGAGG  
TGTTGATGAGGAAGATTTACTCAGTGGACACCATATCCCGGATCAACAGAAATTACTTTGG  
AACACAGAGATATGAACAATGGATAGTTTTTACTCAGAAGAAATGCAGACTGTTGCAACTG  
GAAGATAAGGAGAAGGAGAGCAATATTTGTAGAGACCTTTTCATTTGTACCGAACACTTGC  
GGAAATTCAACGACGCTCTCATTATCAGTGAAGATGCCCCGCATCGAAGATGCTTTAGCCTA  
CCTAAAGGAATTTTTACCAATGTAAAAAATGGACCATATACGGAGTTAGAGAAGCAATTGA  
CGGAGAAATTTCAAGAGAAAGAACTTGAGCTGACTGCCCTTTCAAAGATGAGTCAAATGA  
GAATCCAAAGCTGGAAGAGCTTGCCTGCATCCTGGACGAAGCATACCGCTATAACCCACA  
GACTCGCACTATTCTCTTTGCTAAGACAAGAGCCTTAGTAGCTGCCTTGAAGAAGTGGATA  
GAAGCAAACCCCTACTTAGCCACATAAAGCCAGATGTGCTGATGGGTAAGGGAAGAAGA  
GATCATAAAACAGGTATGACCCTGCCAATGCAGAAGGATGTACTGGATGCATTCAGAAATG

ACAAAGACATCAGACTGCTGATTGCTACATCTGTTGCTGATGAAGGCATTGATATTACCGA  
GTGCAACCTTGTGGTACTCTATGAATACTTCGGGAATGTCACCAAATGATCCAAGTCAGA  
GGTCGTGGAAGGGCAAAGGACAGCAAGTGCATCCTTGTGACAAGCAAAACAGAAGTGGTT  
GAGAATGAAAACTAAACAATTACAAGGAAGAAATGATGAATGCAGCTATTGAAAAGCTACA  
GAACTGGGATGAAACAACATTTGCAAGACAGATTCATGACATGCAAATGAAGGAAAAGATG  
CTACGAGATTCCAGGAAGAACGAAACAAAACATGAAGTAGTGGAAGGGAAAAAAATCTTT  
TGTGTGGAATGCAAAGTGTATGCCTGCAGTACAGATGACATCAGAATTATAAAGGAATC  
TCATCACACTGTCCTAGGTGACGCATTCAAGGAGCGTTATATGACAAAGCCCCACAGGAAA  
CCAGTTCAGTTTGATGGTTTTGAGAAAAAAGCAAGATGCATTGCCAAAATACTGAGTGCC  
AGCACGACTGGGGGATCACTGTGAAGTACAAGACATTTGATAATCTACCAGTGATCAAAAT  
CAAAAGCTTTGTACTGGAGGATGTTGAACTGGGACACAAATGGATTTTCGGAAATGGAAA  
AGTCTTAATTTGTCTTTGAAGAATTTTGATGAAGAAACATCCTGCTGA

>eremophila\_alpestris-rig1

ATGACGGCGGAGGAGAGGGCGGAACCTGCGCTGCTACAGGCGGTACATCGAGAGGAGCCT  
GAACCCCGTGTACATCCTCGGCAACATGACGGACTGGCTGTCCGACGAGGTGAAGGAGA  
GGGTCCGCAAGGAGGAGGAGAAGGGGGTGACGGCGGCCGCCGCGCTGTTCTTGACGC  
CGTGCTGCTGCTGGAGGCGGAGGGCTGGCTCCGGGCCTTCGTGGATGCCCTGGTTGCAG  
CAGGTTACACTGGACTGGCAGAAGCAATTGAAACTGGGACTTCAGCAAATGGAAAACT  
GGAGCTGCACAGGCAGTTGTTGAAGCGGATAGAAGCAACAATGCTAGAAATTGATCCTGTA  
GCAATCATGCCATACATAAACACATGCCTGATAGAGAGGGAGTGTGATGAGATCCTGCAGA  
TCAGTGAGTACAGAAGCAAAGCAGCTGGGATCACTAACTCATTGAATGCCTCTGTCGCTC  
GGATAAGGAAAACTGGCCCAAAAGCCTTCAGCTGGCATTGGATAATGCAGGATATTACAA  
GCAAGTGAATCTGGAATGTAAGAGAAGATAATGGCAAAGATGTTGATGGCAAATGACAA  
ATGCCTCTGAGAATCACTTTGAAACCACGATGACATTTTTTGAAGAAGCAGAATGTGATAAT  
CTCAGTGAAAATCTCTCTTCGGTTTTAGAAAAGCGTCTATGAGTCTTCATCTGTTTATGAACC  
AAAGAAGGCTAGGAGCTACCAGATTGAGCTTGCACAGCCTGCTATTGATGGGAAAAACACA  
TTGATTTGTGCCCCACAGGATCTGGAAAACTTTTGTGGCGCTTCTGATTTGTGAACATCA  
TTTGCAAAACGTTCCCTCAGGACGAAAGGCAAAAGTTGTCTTCCTTGCAACCAAATGCCA  
GTGTATGAGCAACAGAAAAATGTATTCAGGCAGCATTTTGAAGAAGTGGATATTCTGTTCA  
AGGCATTTGTGGTGAAACAGTTGCAAATATCTCTGTAGAAAATGTTATACAGGACAGTGACA  
TCATTGTGCTAACGCCCCAGATTCTTCTGAATAGCATGGAGAAAGGGATCCTTAGCTCCCT  
CTCCATCTTCACTCTGATGATATTTGATGAGTGCCACAACACTACAGGCAACCACCCTTACA  
ATGTGTTGATGGCCAGATACCTGGATCAAAACTTGACTCCTCTGCAAACCAGCTGCCTCA  
GATTGTAGGTTTAACTGCTTCTGTTGGGGTTGGTAGTGCCAAGAGCACTAATGAAACAGTA  
GAGCACATCTGTACCCTCTGCTCCTACCTTGACATTCAGGCCATATCCACTGTCAGAGAGA  
ACAAAGAAGATCTGCAAAGGTTTGAAACAAGCCAGAAACACATATCAGATGGGTAAAAT  
GCGAGCTCAGAATCACTTTGCAGACATTATCTCAGTTCTGATGTCTGAGACAGAGGTGTTG  
ATGAGGAAGACTTACTCAGTGGATACCATCTCCCAAATCAACAAGAGTTACTTTGGAACAC  
AGAGATATGAACATTGGATAGTTTCCACTCAGAAGAAATGCAGACTGTTGCAACTGGAAGA  
TAAGGAGAAGGAGAGCAGTATTTGTAGAGACCTTTTCATTTGACTGAACATTTGCGGAAAT  
TAAACGACGCTCTCATTATCAGTGAAGATGCCCGCATCGAAGATGCTTTAGCCTACCTAAA  
TGAATTTTTCACAAATGTAAAAATGGACCATATACAAAATTAGAGAAGCAACTGACGGAGA  
AATTTCAAGAGAAAGAACCAGAGCTGACTGCCCTCTCAAAAGATGAGTCAAATGAGAATCC  
CAAGTTGGAAGAGCTCACTTGCATCCTGGATGAAGCGTACCGCTATAACCCAGAGACTCG

CACAATTCTCTTTGCCAAGACAAGAGCCTTAGTAACTGCTTTGAAGAAGTGGATAGAAGCA  
AACCCCTGACTTAGCCACATAAAGACAGATGTGTTGATGGGTAAGGGAAGAAGAGACCATA  
AAACAGGTATGACCCTGCCAATGCAGAAGGATGTACTGGATGCATTGAGAAATGACAAAGA  
CATCAGACTACTAATTGCTACATCTGTTGCTGATGAAGGCATTGATATTACTGAGTGTAAAC  
TTGTGGTGCTCTATGAATACTTCGGTAATGTCACCAAAATGATCCAAGTTAGAGGTCGTGG  
AAGGGCAGAAGGCAGCAAGTGCATCCTTGTGACAAGCAAAACAGAAGTGGTTGAGAATGA  
AAAATAACAATTACAAGGAAGAAATGATGAACGCAGCTATCGAAAAGCTACAGAAGTGG  
GATGAAACAACATTTGCAAGAACGATACGTGGGCTGCAAATTAGAGAAAAAATGCTACGAG  
ATTCCAGAAAGAAGGAAACCAACATAAAGTAGTGGAAGGGAAAAAATCTTTTGTGTGG  
AAAATGCAAAGCATATGTCTGCAGTACAGATGACATCAGAATTATAAAGGAATCTCAGCACA  
CTGTCCTAGGTGACGCATTCAAGGAGCGTTACATAACAAAGCCCCACAAGAAACCACGTAT  
GTTTGATGGTTTTGAGAAAAAAGCAAGATGCATTGCCGAAATACTGAGTGCCAGCATGAC  
TGGGGGATCACAGTGAAGTACAAGACATTTGATAATCTACCAGTGATCAAAATCAAAGCTT  
TGTAAGTACAGAAATGTTGAAACTGGGACACAAATGGATTTTCAGAAATGGAAAAGTATTAAT  
TGTCTTTGAAGAATTTTGATGAAGAAACATCCAGCTGA

>erythrura\_gouldiae-rig1

ATGACGGCGGAGGAGAAGCAGAGCCTGCGGTGCTACAGGCGCTACATCGAGAGGAGCCT  
GAACCCCGTGTACATCCTCAGCAACATGACGGAGTGGCTGTCCGATGAGGTGAGGGAGA  
GAGTCCGGAAGGAGGAGGAGAAGGGAGTGACGGCGGCCGCCGCGCTGTTCTGGATGC  
CGTGCTGCTGCTGGAGGCGGAGGGCTGGTTCCGGGGCTTCCTGGATGCTCTGGCTGCCG  
CAGGTTACACTGGACTGGCAGAAGCAATTGAAAAGTGGGACTTCGGCAAACTGGAAGAACT  
GGAGCTGCACAGGCAGCTGTTGAAGCGGATAGAATCAACAATGCTAGAAATTGATCCTGTA  
GCAATCATGCCATACATAAACACATGCCTGATAGAGAGGGAATGTGATGAGATCATGCAGA  
TCAGTGAATACAGAAGCAAAGCAGCTGGGATAACTAACTCATTGAATGCCTCTGTGCTC  
GGATAAGGAAAGTGGCCCAAAAGTCTTCAGCTGGCATTGGATAGTGACAGGATATTACAAT  
GCAAGTGAAGTGTGAATATAAGAGAAGATAATGGCAAAGATGTTGATGGTGAAATTACAG  
ATGCCTCTGAGAATTACTTTGAAACCATAATGACATTTTCTGAAGAAGCAGAATGTGATAAT  
CTGAGCAAAATCTCTCTTCAGTTTCAGAAAGCATCTATGAGTTTTCATCTGTTTATGAACCA  
AAGAAGGCTCGGAGCTACCAGATTGAGCTTGACAGCCTGCTATTGCTGGGAAAAACACA  
TTGATTTGTGCCCCACAGGATCTGGAAAACTTTTGTGGCAGTTCTGATTTGTGAACATCA  
TTTGCAAAACATTCCCTCAGGACGAAAGGCAAAAGTTGTCTTCCTTGCAACCAAAATGCCA  
GTGTATGAGCAACAGAAAAATGTATTCAGGCAGCATTTTGAAGAAGTGGATACTCTGTTCA  
AGGAATTTGTGGTGAAACAGTTGCAAATATCTCTGTAGAAAATGTTATACAGGACAGTGACA  
TCATTGTGCTAACGCCCCAGATTCTTGTGAATATCATGGAAAAAGAGATCCTTAGCTCCCTT  
TCCATCTTCACTCTGATGATATTTGATGAATGCCACAACACTACAGGCAACCACCCTTATAA  
TGTGTTGATGACCAGATACCTGGATCAAAAATTTGACTCCTCTGCAAAACCGCTGCCTCAG  
ATTGTAGGTTTAACTGCTTCTGTTGGAGTTGGTAATGCCAAGAACAATAATGAAACTGTAGA  
GCACATCTGTACCCTCTGCTCCTACCTTGACATACAGGCTATATCCACCGTCAGAGAGAAC  
AAACAAGATCTGCAGAGGTTTGGAAACAAGCCAGAAACACATATCAGATGGGTTAAAATGC  
GAGCTCAGAATCGTTTTGCAGACATTATCTCAGGTCTGATGTCTGAGACAGAGGTTTTGAT  
GAGGAAGATTTACTCAGTGGATACCATCTCCCAAATCAACAAGATTTACTTTGGAACACAGA  
GATATGAACACTGGATAGTTTCCAATCAGAAGAAATGCAGACTATTGCAACTGGAAGATAA  
GGAGAAGGAGAGCAGTATTTGTAGAGACCTTTTCATTTGTAAGTGAACACTTGCGGAAATTC  
AACGATGCTCTCATTATCAGTGAAGATGCCCGCCTCGAAGATGCTTTAGCCTATCTGAATG

AATTTTTCACAAATGTGAAAAACGGACCATATACAGAGTTAGAGAAGCAGCTGACGGAGAA  
ATTTCAAGAGATAGAACTAGAGCTGACTGCCCTTTCAAAGATGAGTCAAATGAGAATCCAA  
AGTTGGAAGAGCTTGCTTGCATCCTGGATGAAGCATACCACTATAACCCACAGACTCGCAC  
TATTCTCTTTGCCAAGACCAAAGCTTTAGTAGCTGCTTTGAAGAAGTGGATAGAAGCAAACC  
CTCTTCTTAGCCACATAAAGCCAGATGTGTTGATGGGTAAGGGAAGAAGAGATCAAAAAAC  
AGGTATGACCCTGCCAATGCAGAAGGGTGTCTGGATGCATTAGAAATAACAAAGACATC  
AGACTGCTAATTGCTACATCTGTTGCTGATGAAGGCATTGATATTACTGAGTGCAATCTTGT  
GGTGCTCTATGAATACTTCGGTAATGTCACCAAAATGATCCAAGTCAGAGGTCGTGGAAGG  
GCAAAGACAGCAAGTGCATCCTTGTGACAAGCAAACTGAAGTGGTTGAGAATGAAAAAT  
TAAACAGTTACAAGGAAGAAATGATGAATGCAGCTATTGAAAAGCTACAGAACTGGGATGA  
AACAAATTTGCAAGAAAGATACATGGCCTCCAAATGAAGGAAAAGATGCTAAGAGATTCC  
AGGAAGAATGAAACAAAACACGAAATAGTAGAAGGGAAAAAAATCTTTTGTGTGGAAT  
GCAATCATATGCCTGCAGTACTGATGACATCAGAATTATAAAGGGATCTCATCACATTGTC  
TTAGGTAACGCATTCCAGGAGCGTTATACAACAAAACCCACAGGAAACCGGTTTCAGTTTG  
ATGATTTCTGTGAAAAAAGCAAGATGCATTGCCGAAATACCGAGTGCCAGCATGACTGGGG  
GATCATAGTGAAGTACAAGATATTTGATAATCTACCCGTGATCAAAATCAGAAGCTTTGTAC  
TACAGGATGTTGAAAGTGGGACACAAATGGATTTACAGAAATGGAGAAGTATTAATTTGTCT  
TTGAAGAATTTTGATGAAGAAACATCCAATAA

>eupsittula\_pertinax-rig1

ATGACGGCAGAGGAGAAGAGGAACCTGCAATGCTACAGGCGCTACATCGAGAAGAGCCT  
GAACCCTGTCTACATCCTGGGCAACATGACAGCCTGGCTGTCGGACGAGGAGAAGGAGC  
GAGTCCGTAAGGAGGAGGAGAAGGGGGTGACGGCGGCCGCCGCGCTGTTCTGGATAC  
CATCTTGCTGCTGGAGGCGGAGGGCTGGCTCCGGGGCTTCTGGATGCCCTGGTTGCAG  
CAGGTTACACTGGGCTGGCAGAAGCAGTTGAAAATTGGGACTTCAGTAAGCTGGAAGAACT  
GGAATTGCACAGACAGTTGTTGAAGAGGATAGAAGCAACCATGCTAGAAGTTGATCCAGTC  
GCACTCATGCCTTACATAAACACGTGCCTGATAGAAAGGGAGTGTGATGAGATCCTGCAGA  
TTAGCGAATACAGAAGCAAAGCAGCTGGGATAACTAACTCATTGAATGTCTCTGTGATC  
AGATAAGGAAAACCTGGCCAAAAGCCTTCAGCTGGCACTGGATAACACAGGATATTACAA  
GCAAGTGAAGTATGGGATATGAGAGAAGATAACAGCAAAGATGTTGATGGTGAAATGACAG  
ATGACTTTAAGAACAGCTTTGAAACCACAATGACATTTTCTGAGGAGGCAGAATGTGATAAT  
AATCTCAGTGAAAATCTCTGTTCTGGGTTTCTGAGAGGTCTATCAGTCTTCGCCTGTTTATGA  
ACCAAAGAAGGCTCGGAGCTACCAGACTGAACTGGCACAGCCTGCTATCAATGGGTATAA  
CACATTGATATGTGCCCCACAGGATCTGGAAAACTTTTGTGGCACTGATGATTTGTGAA  
CACCATTTCCAAAACATGCCCTCAGGACAAAAGGCAAAAGTTGTCTTTCTTGCAACCAA  
GCCAGTGTATGAACAACAGAAAAATGTATTCAAGCAGCACTTTGAAAGAAGTGATATTCT  
GTCCAAGGAATTAGCGGTGAAACAGTTGCAAATGTCTCTGTAGAAAAGGTTATACAAGACA  
GCGACATCATTGTGCTAACACCCCAAGATTCTTGTGAATAGCATCGAGGAAGGGATCCTTAG  
TTCCCTCTCCATCTTCACTCTGATGATATTTGATGAGTGCCACAACACTATGGGCAACCACC  
CTTACAATGTGTTAATGACCAGATACCTGGACCAAAATTTGACTCCTCTGCAAGCCAATA  
CCTCAGATTGTAGGTTTAACTGCTTCTGTTGGAGTTGGTAATGCCAAGACCACCAAGGAAA  
CAGTAGAGTACGTCTGTACTGTCTGCGCCAGCCTTGACATACAGGCCATATCTACTGTCAG  
AGAGAACAAACAGGATCTGCAGAGATTTGGAACAAACCAGAAATAGATGTCAGATGGGTG  
AAAACGAGAGCTCAAAATCACTTTGCAGGGATTATTTAGGCCTGATGTCTGAGACAGAGG  
CATTGATGAGAAAGAATTACTCAGTGGATACTATCTCCAGATCAGCAAAAATGATTTTGA

ACACAGAAATATGAACACTGGGTAGTTGCCACTCAGAAGAAATGTAGACTATTGCAACTGG  
AAGATAAGGAGAAGGAGAGCAGCATTTCAGAGACCTTTTCATTTCAGCTGAACACCTGCG  
GAAATTCAATGATGCTCTCATCATCAGTGAAGATGCCCGCATTGAAGATGCTTTAGCCTAC  
CTAACTGATTTTTTCAGAAATGTCAGAAATGGACCATATACAGATTTAGAGAAGCAACTTAC  
AGCCAAATTTCAAGAGAAAGAACCAAAACCTGTTAGCCCTTTCAAAGATGAAGCAAATGAG  
AATCCTAAGCTGGAAGAGCTTGCTTGATCCTGGATGAAGCATACCACTATAACCCACAGA  
CTCGCACTATTCTCTTTGCAAAGACAAGAGCCTTAGTAGCTGCTTTGAAGAAGTGGATAGA  
AGCAAACCCTCTATTTAGCCACATAAAGCCAGGTATATTGATGGGTCATGGAAGAAGAGAT  
CAAAAAACAGGTATGACCCTCCCAATGCAGAAGGATGTACTGGATGCATTCAAACCAACA  
AAGACACCAGACTGCTAATTGCTACTTCTGTTGCTGATGAAGGCATTGATATTTCTGAGTGC  
AACCTTGTTGTGCTCTATGAATACTTTGGTAATGTCACCAAAATGATCCAAGTCAGAGGTGCG  
TGGAAGGGCTAAAGACAGCAAGTGCATCCTCCTGACAAACAAAACAGAAGTGGTTGAGAA  
AGAGAAACAGAACCGTTACAAGGAAGAAATGATGAATGAAGCTGTTGAAGAGCTACAGAAT  
TGGGATAGAAGAACATTTGCAGAAAAGATACATGAATTGCAAAGGATGGAAAAGGTATTAC  
GAGATTCCAGGAAGAAAGAAACGAGATACAAGGTAGTGAAGGAAAGAAAAATCTTCTGTG  
TGGAAGTGCAAAGCATTGCGCTGCAGTACAGATGACATCCGAATCATAAAGGAATCTCAT  
CACACTGTCCTAGGAGATGCGTTCAAGGAGCGGTATATAACAAAGCCTCACCATAAACCAT  
GCCAGTTTGATGGTTTTGAGAAAAAAGCAAGATGCATTGCCAAAATATTAAGTCCAGCAT  
GACTGGGGAATTACAGTGAAGTACAGGACATTTGATAATCTACCAGTGATCAAATCAAAA  
GCTTTGTAGTAGAAAACATTGCAACTGGAACACAAATGGATTTTCAGAAATGGAAAGATATT  
AATTTTTCTCTGAAGAATTTTGATGCTGAAGAACTGTCCAGCTGA

>ficedula\_albicollis-rig1

ATGACGGCGGAGGAGAAGCAGAACCTGCGGTGCTACCGGCGGTACATCGAGAGGAGCCT  
GAACCCCGTGACGTCTCAGCAACATGACGGACTGGCTGTCCGACGAGGTGAAGGAGA  
GGGTCCGTAAGGAGGAGGAGAGGGGGGTGACGGCGGCCGCCGCGCTGTTCTGGATGC  
CGTGCTGCTGCTGGAGGCGGAGGGCTGGCTCCGGGGGTTCTGGATGCGCTGGTGGCT  
GCAGGTTATACTGGGTTGGCAGAAGCAATTGAAAACCTGGGACTTCAGCAAGCTGGAAAAA  
CTGGAGCTGCACAGGCAGCTGTTGAAGCGGATAGAAGCAACAATGCTAGAAGTTGATCCT  
GTAGCAATCATGCCATATATAAACACGTGCCTGATAGAGAGGGATTGCGATGAGATCCTGC  
AGATCAGTGAATACAGAAGCAAAGCAGCTGGGATAACCAAACCTCATTGAGTGCCTCTGTGCG  
CTCGGATAAGGAAAACTGGCCCAAAAGTCTTCAGCTGGCACTGGATAATGCAGGATATTAC  
AATGCTAGTGAAGTGTGGAATATAAGAGAAGAGAATGGCAAAGATGTGGATGGTGAAATGA  
CAGATGCTTCTGAGAATTACTTTGAAACCATGGTGACATTTTCTGAAGAAGCAGAATGTGAT  
AATCTCAGTGAAGTCTCTCTTCAGTTTCAGAAAGCACGTATGAGTCTTCATCTGTTTATAAA  
CCAAAGAAGGCCCGGAGCTACCAGATTGAGCTTGACACAGCCTGCTATTGATGGGAAAAAC  
ACAATGATTTGTGCCCCACAGGATCTGGAAAACTTTTGTGGCACTTATGATTTGTGAACA  
TCATTTGCAAACGTTCCCTCAGGACAAAAGGCAAAAGTTGTCTTCCTTGCAACCAAAGTG  
CCAGTGTATGAGCAACAGAAAAATGTGTTTCAGGCAGCATTTTGAAAGGAGTGGATACTCTG  
TTCAAGGAATTTGTGGTGAAACAGTTGCAAATATGTCTGTAGAAAATGTTATACAGGACAGT  
GACATCATTGTGCTAACTCCCAGATTCTTGTAATAGCATGGAGAAAGGGATCCTTAGCT  
CCCTCTCATCTTCACTCTGATGATATTCGATGAGTGCCACAACACTACAGGCAACCACCC  
TTACAATGTGTTGATGACCAGATACCTGGATCAAAAATTTGACTCCTCTGCAAAACAGCTGC  
CTCAGATTGTAGGTTTAAGTCTTCTGTTGGAGTTGGCAGTGCCAAAAGCACTAATGAAAC  
TGTAAGACACATCTGTACCCTCTGCTCCTACCTTGATATACAGGCCATATCCACTGTCAGA

GAGAACAAACAAGATCTGCAGAGGTTTGGAAACAAGCCTGAAACACATATCAGATGGGTAA  
AAATGCGAGCTCAGAATCGCTTTGCAGACATTATCTCAGGTCTGATGTCTGAGACAGAGGT  
GTTGATGAGGAAGATTTACTCAGTGGATACCATCTCCCAAATCAACAAGAATTACCTTGGAA  
CACAGAGATATGAGCAATGGATAGTTTCCACTCAGAAGAAATGCAGACTGTTGCAACTGGA  
AGATAAGGAGAAGGAGAGCAGTATTTGTAGAGACCTGTTCAATTTGACTGAACACTTGCGG  
AAATTC AACGACGCTCTGATTATCAGTGAAGATGCCCCGCATCGAAGATGCTTTAGCCTACC  
TGAATGAATTTTTTACAAATGTTAAAAATGGACCATATACAGAGTTAGAGAAGCAACTGACA  
GAGAAATTTCAAGAGAAAGAACCAGAGCTGACTGCCCTTTCAAAGATGAGTCAAATGAGA  
ATCCAAAGTTGGAAGAGCTTGCTTGCATCCTGGACGAAGCATACCGCTATAACCCGGAGA  
CTCGCACTATTCTCTTTGCCAAGACAAGAGCCCTAGTAGCTGCTTTGAAGAAGTGGATAGA  
AGCAAACCTGTACTTAGCCACATAAAGCCAGATGTGTTGATGGGTAGGGCAAGAAGAGA  
CCATAAAACAGGTATGACCCTGCCAATGCAGAAGGGTGTACTGGATGCATTAGAAATGAC  
AAAGACATCAGACTCCTAATTGCTACATCTGTTGCTGATGAAGGCATTGATATTACTGAGTG  
CAACCTTGTGGTGCTCTATGAATACTTCGGTAATGTCACCAAAATGATCCAAGTCAGAGGT  
CGTGGAAAGGGCAAGAGACAGCAAGTGCATCCTGGTGACAAGCAAAACAGAAGTGGTTGAA  
AATGAAAACTAAACCGTTACAAGGAAGAAATGATGAATGCAGCTATTGAAAAGCTACAGAA  
CTGGGATGAAACAACATTTGCGAGAACGATATGTCGCCTGCAAAGGAGGGAAAAAGGTACT  
ACGAGATTCCAAGAAGAACGAAACAAAACCTGAAGTACTGAAAGGGAAAAAAAATCTTTTG  
TGTGGAAAATGTAAAGTGTATGTATGCAGTACAGATGACATCAGAATTATAAAGGAATCTCA  
TCACACTGTCCTGGGTGACACGTTCAAGGAGCGTTACATAACAAAGCCCCACAGGAAACC  
GGTTCAGTTTGATGGTTTTGAGAAAAAAGCAAGATGCATTGCCAAAATGCTGAGTGCCAG  
CACGACTGGGGGATCACAGTGAAGTACAAGACATTTGATAATCTACCAGTGATCAAAATCA  
AAAGCTTTGTACTAGAGGACATTGAAACTGGGACACAAATGGATTTTCAGAAATGGAAAAG  
TATTAATTTGTCTTTGAAGAATTTTGATGAAGAAACATTCAGCTGA

>gallirallus\_okinawae-rig1

ATGACGGCGGAGGAGAAGAAGAGCCTGCAGTGCTACAGGCATTACATCGAGAAGAGCCT  
GAACCCCGTCTTCATCCTGAGCAACATGACGGACTGGCTGTCGGACGAGGTAAAGGAGCG  
GGTCTCAAGGAGGAGGAGGAGAAAGGGGTGACGGCGGCCGCGCTGTTCTGGAT  
GCCGTCCTGCAGCTGGAGGCGGAGGGCTGGCTCCGGGGCTTCCTGGACGCCCTGGTTG  
CAGCAGGTTACACTGGACTGGCAGAAGCAATTGAAAATGGGACTTCAGCAAATGGAAA  
AACTGGAGCTACACAGACAGCTGTTGAAGCGAATAGAAGCAACAATGCTAGAAGTTGATCC  
AGTATTGCTCATGCCCTATATAACATGTGCCTGATAGAAAGGGAGTGTGATGAGATCCTG  
CAGATCAGCGAATGCAGGAGCAAAGCGGCCGGGATAACTAACTCATCGAGTGTCTGTGT  
CGATCAGATAAGGAGAACTGGCCAAAAAGCCTTCAGCTGGCACTGGAAAGTACAAGGTAC  
TACAATGCAAGCGAACTGTGGGATATGAGAGAAGAAAATGGCAAAGATGGTGATGGTGGA  
ATGACCAATGCCTCTGAGAGCAGCTTTGAAACAATATCATTTTCTGAAGAAGCAGAATGTGA  
TAATAATCTCAGTGAAAATCTCTGTTTCAGCTTCAGAAGGGGTCTGCCAGTCTCCACCTGTTT  
ATGAACCAAAGAAGGCTCGGAGCTACCAGATTGAACTTGACAAACCTGCTCTCACTGGCAA  
AAACACGTTGGTGTGTGCCCCACAGGATCTGGGAAAACCTTTGTGGCACTTATGATTTGT  
GAGCACCATTTCCAAAACATGCCTGCGGGGCGCAAGGCGAAAGTTGTCTTCTGGCCACG  
AAAGTGCCAGTGTACCAACAGCAGCAAATGTGTTCCAGCAGCATTTTCAAAGAAGTGGAT  
ATTCTGTTCAAGGAATTAGTGGTGAACTGTTGCAAATGTCTCCATAGAGAAGGCTATAGA  
GAGCAGTGACATTGTTGTGCTGACACCCAGATTCTTGTGAATAGCATGGAGGAAGGGAT  
CCTTAGCTCCCTCTCCATCTTCACACTGATGATATTTGATGAGTGCCACAACACTACAGGCA

ACCACCCTTACAATGTGTTAATGACCAGATATCTGGAACAGAAATTTGACTCCCCTGCAAAC  
CCGCTGCCTCAGATTGTAGGTTTAACTGCTTCTGTTGGAGTTGGTAGTGCCAAGACTGTCA  
CCGAAACAATAGAGCACATCTGTACCCTTTGCTCCTACCTTGACATACAGGCCATATCCAC  
TGTTAGAGAGAACATACAGGATCTGCAGACATTTGTGAACAAGCCAGAAACACATGTCAGG  
TGTGTTAAAATGCGAGCTCAGAATCACTTTGCAGACATTGTCTCAGGCCTGATGTCAGAGA  
CAGAGGCATTGATGAGGAAGATTTACACAGTGGACAGCATCTCTCCAATCAACAAGAATGA  
TTTTGGAACACAGAAATATGAACAATGGATAGTTTTCCACTCAGAAGAAATGCAGACTGTTGC  
AGCTGGAAGATAAGGAGAAAGAGAGCAGCATTTCAGAGACCTTTTCATCTGCACTGAACA  
CCTGCGAAAACCTGAACGATGCCCTCATCATCAGTGAAGATGCCCGCATCGAAGATGCTTTA  
GCCTACCTAACCGAATTTTTTACCAATGTCAAAAATGGACCATATACAGAGTTAGAGAAGCA  
ACTGACAGGCCAAATTTCAAGAGAAAGAACCGAAACTGACTGCCCTTTCAAAGATGAATCA  
AATGAGAATCCCAAGCTGGAAGAGCTTGCTTGCATCCTGGATGAAGCATACCACTACAACC  
CAGAGACTCGCACTCTGGTCTTTGCCAAGACAAGAGCCTTAGTAGCTGCTTTGAAGAAGTG  
GATGGAAGCAAACCTCTATTTAGCCACATAAAACCAGGTGTGCTGATGGGTGCTGGAAGA  
AAAGATCAAAAAACAAGTATGACGCTTCCAATGCAGAAGGGTGTACTGGATGCATTCAAAA  
CCAACAAAGACTGCAAACCTGCTAATTGCTACATCTGTTGCTGATGAAGGCATTGATATTTCT  
AAGTGCAACCTTGTTGTGCTCTATGAATACTATGGTAACGTCAACAAAATGATCCAAGTCAG  
AGGTGCTGGAAGGGCAAGAGACAGCAAGTGCATCCTTGTGACAAACAAAACAGAAGTGGT  
TGAGAACGAGAGACAGAACTGTTTTAAGGAAGACATGATGAATGAAGCTATTGAAAAGCTA  
CAGAATTGGGATGAAACAAAATTTACAAGAAAGATACATGACCTGCAAATGAAGGAAAAAG  
TATTGAGAGATTCCAGGAAGAAAGGCACAATTTGTAAGGTACTGGAAGGGAAAAAAAATCT  
TCTCTGTGGAATGCAAAGCATATGCTTGCAGTACAGATGACATCAGAGTTATAAAGGAAT  
CTCATCATACTGTCCTAGGAGATGCATTCAAGGAGCGTTATATAACGAAGCCTCACCACAG  
ACCAGTCCAGTTCGACTGTTTTGTGAAAAAAGCAAGATGCACTGCCAAAATACTCACTGC  
CAGCATGACTGGGGAATCACAGTAAAGTACAAGACATTTGATGATCTACCAGTGATCAAAA  
TCAAAAGCTTTGTAGTAGAGCAAGTTGAAACTGGGGCACAAATGGATTTTCAAAAATGGAG  
AGATATTAACCTTTACTTTGAAGAATTTTGATGCTGAAGAAACAGCCAGCTGA

>geothlypis\_trichas-rig1

ATGACGGCGGAGGAGAAGCGGAACCTGCAGTGCTACAGGCGCTACATCGAGAGGAGCCT  
GAACCCCGTGACATCCTCAGCAACATGACGGAATGGCTGTCCGACGACGTGAAGGAGAG  
AGTCCGAAAGGAGGAGGAGAAGGGCGTGACGGCGGCCGCGCTGTTCTGGATGCC  
GTGCTGCTGCTGGAGGAGGAGGGCTGGCTCCGGGGCTTTCTGGATGCCCTGTTGCAGC  
AGGTTACACTGGACTGGCAGAAGCAATTGAAAACCTGGGACTTCAGCAAACCTGGAAAACTG  
GAGCTGCACAGGCAGCTGTTGAAGCGGATAGAAGCAACAATGCTCGAAATTGATCCTGTA  
GCAATCATGCCATACATAAACACATGCCTGATAGAGAGGGAGTGTGATGAGATCCTGCAGA  
TCAGTGAATACAGAAGCAAGGCAGCCGGCATAACGAAACTCATTGAATGCCTCTGTCGCTC  
GGATAAGGAAAACCTGGCCCAAAAGTCTTCAGCTGGCATTGGATAATGCAGGATATTACAAT  
GCAAGTGAACCTGTGGAATATAAGAGAAGATAATGGCAAAGACATTGATGGTGAAACGACAT  
ATGCCTCTGAGAATTACTTTGAAACCATGATGACATTTTCTGAAGAGGCAGAAATGTGATAAT  
CTGAGCAAAAATCTCTCTCAGTTTCAGAAAGCATCTATGAATCTTCATCTGTTTATGAACCA  
AAGAAGGCTCGGAGCTACCAGATTGAGCTTGACAGCCTGCTTTTGATGGGAAAAACACAT  
TGATTAATGCCCCCACAGGATCTGGAAAACTTTTGTGGCACTTATGATTAGTGAACATCAC  
TTGCAAAATGTTCCCTCAGGACGAAAGGCAAAAGTTGTCTTCCTTGCAACCAAAGTGCCTG  
TGTATGAGCAGCAGAAAAATGTATTCAGGCAGCATTTTGAAGAAGTGGATACTCAGTTCA



AGGAATTTGTGGTGAAACAGTTGCAAATATCTCTGTAGAAAATGTTATACAGGACAGTGACA  
TCATTGTGCTAACACCCCAGATTCTTGTGAATAGCATGGAGAAAGGGATCCTTAGCTCCCT  
CTCCATCTTCACTCTGATGATATTTGATGAGTGCCACAACACTACAGGCAACCACCCTTACA  
ATGTGTTGATGACCAGATACCTGGATCAAAAATTTGACTCCTCTGCAAACCAGCTGCCTCA  
GATTGTAGGTTTAACTGCTTCTGTTGGAGTTGGTAATGCCAAGAGCACTAATGAAACTGTA  
GAGCACATCTGTACCCTCTGCTCCTACCTTGACATACAGGCCATATCCACTGTCAGAGAGA  
ACAAAGAAGATCTGCAGAGGTTTGGAAACAAGCCAGAAACACATATCAGATGGGTAAAT  
GAGACCTCAGAATCACTTTGCAGACATTATCTCAGGTCTGATGTCTGAGACTGAAGTGTG  
ATGAGGAAGATTTACTCAGTGGATACCATCCCCAGATCAACAAGAATTACTTTGGAACAC  
AGAGATATGAACAGTGGATAGTTTCCACTCAGAAGAAATGCAGACTATTGCAACTGGAAGA  
TAAGGAGAAGGAGAGCAGTATTTGTAGAGACCTTTTCATTTGTAAGCACTTGCGGAAA  
TTCAACGATGCTCTCATTATCAGTGAAGATGCCCGCATTGAAGATGCTTTAGCCTACCTAAA  
TGAATTTTTTCACAAATGTAAAAAATGGACCATTTACAGAGTTAGAGAAGCAGCTGACAGAGA  
AATTTCAAGAGAAAGAACAAGAGCTGACTGCCCTTTCAAAGATGAGTCAAATGAGAATCC  
GAAGTTGGAAGAGCTTGCTTGCATCCTGGATGAAGCATACCACTATAACCCAGAGACTCGC  
GCTATTCTCTTTGCCAAGACAAGAGCCTTAGTAGCTGCCTTGAAGAAGTGGATAGAAGGAA  
ACCCTCTTCTTAGCCACATAAAGCCGGATGCGTTGATGGGTAAGGGAAAAAGAGATCAGAA  
AACAGGTATGACCTTGCCAATGCAGAAGGGTGTACTGGATGCATTCAGAAATGACAAAGAC  
GTCAGACTGTTAATTGCTACATCTGTTGCTGACGAAGGCATTGATATTATTGAGTGCAACCT  
TGTGGTGCTCTATGAATACTTCGAAATGTCACCAAAATGATCCAAGTCAGAGGTCGTGGA  
AGGGCAAGAGACAGCAAGTGCATCCTTGTGACAAGTAAAATAGAAGTGGTTGAGAATGAAA  
AACTAAACAGTTACAAGGAAGAAATGATGAATACAGCTATTGAAAACTACAGAACTGGGAT  
GAAACAACATTTGCAAGAAAGATACGTGGCCTGCAAATGAAGGAAAAGATGCTACGAGATT  
CCAGGAAGAACAACAAAAGAAAGAAATAGTAAAAGGGAAAAAAATCTTCTGTGTGGA  
ATGCAAAGCATATGTCTGCAGTACAGATGACATCAGAATTATAAAGGAATCTCATCACACTG  
TCTTAGGTGATGCGTTCAAGGAGCGTTATACAACAAAGCCCCACAGGAAACCTTTTCAGTT  
TGATGGTTTTTGAGAAAAAAGCAAGATGCATTGCCGAAATACTGAGTGTGAGCATGACTGG  
GGGATCATAGTGAAGTACAAGATATTTGATAATCTACCAGTGATCAAAATCAGAAGCTTTGT  
ACTAGAGGATGTTGAAACAGGGACACAAATGGATTTTCAGAAATGGAAAAGTATTAATTTGT  
CTTTGAAGGAGTTTGATGAAGAAACATCCAGCTGA

>grus\_nigricollis-rig1

ATGACGGCGGAGGAGAAGAAGAGCCTGCAGTGCTACAGGCGGTACATCGAGAAGAGCCT  
GAACCCCGTCTACATCCTAAGCAACATGACGGACTGGCTGTCCGACGAGGTGAAGGAGAG  
AGTCCGGAAGGAGGAGGAGAAGGGGGTGACGGCGGCCGCCGCGCTGTTTGTGGATACC  
ATCCTGGAGCTGGAGGCGGAGGGCTGGCTGCGGGGCTTCCTGAACGCCCTGGTTGCAGC  
AGGTTACACTGGACTGGCAGAAGCAATTGAAAACCTGGGACTTCAGCAAACCTGGAAAACTG  
GAACTGTACAGACAGCTGTTGAAGCGGATTGAAGCAACAATGCTAGAAGTTGATCCGGTAG  
CACTCATGCCCTACATAAACACGTGCCTGATAGAAAGGGAGTGTGATGAGATCCTGCAGAT  
TAGCGAATACAGAAGCAAAGCAGCCGGGATAACTAAGCTCATTGAATGTCTGTGCGATCG  
GATAAGGAAAACTGGCCAAAAAGCCTTCAGCTGGCACTAAATAACACAGGATATTACAATG  
CAAGTGAACGTGTGGGATATGAGAGAAGGAAACGGCAAAGATGTTGATGGTGAAGTGACAG  
ATGCCTCTGAGAACAGCTTTGAAACCATGATAACATTTTCTGAAGAAGCAGAACCTGATAAT  
AATCTCAGTGAAAATCTCTGTTGAGCTTCAGAAGGAATCTATCAGCCTTCACCTGTTTATGA  
ACCAAAGAAGGCTCGGAGCTACCAGATTGAACTTGCGCAGCCTGCTATCGATGGGAAAAA

CACATTGATATGTGCACCCACAGGATCTGGAAAACTTTTGTGGCAGTTATGATTTGTGAAC  
ATCATTTCCAAACATGCCCACAGGACGAAAGGCCAAAAGTTGTTTTCTTGCAACTAAAGTG  
CCAGTGTACCAACAACAGAAAAACGTATTCAAGCAGCATTGTTGAAAGAAGTGGATATTCTGT  
TCAAGGAATTAGTGGTGAACAGTTGCAAATGTCTCTGTAGAAAAGGTTATACAGAACAGT  
GACATTGTTGTGCTGACGCCCCAGATTCTTGTGAATAGCATTGAGGAAGGGATCCTTAGCT  
CCCTCTCCATCTTCACTCTGATGATATTTGATGAGTGCCACAACACTACAGGCAACCACCC  
TTACAGTGTGTTAATGACCAGATACCTGCAACAAAAATTTGACTCCTCTGCAAACCAGCTGC  
CTCAGATTGTAGGTTTAACTGCTTCTGTTGGAGTTGGTAATGCCAAGAGCATCAAGGAAAC  
AATAGAGCACATCTGCACCCTCTGCTCCTACCTTGACATACAGGCCATATCCACTGTCAGA  
GAGAACAAGAGGATCTGCAGAGATTCGGAACAAGCCAGAAATGTATGTCAGATGGGTTA  
AAATGCGAGTTCAGAATCACTTTGCAGACATTATCTCAGGTCTGATGTGTGAGACAGAGGA  
GTTGATGAGGAAGATTTACTCAGTGGATAATATCTCTCAAATCAACAAGAATGATTTTGGAA  
CACAGAAATATGAGCACTGGATAGTTGCCACTCAGAAAAATGCAGACTGTTGCAACTGGC  
AGATAAAGAGAAGGAGAGCAGCATTGTAGAGACCTTTTCATTTGCACTGAACACCTGCGG  
AAATTCAACGATGCTCTCATCATCAGTGAGGATGCCCGCATCGAAGATGCTTTATTCTACCT  
AACTGAATTTTTCATAAATGTCAAAAACGGACCATATACGGAGTTAGAGAAGCAACTGACAG  
CCAAATTTCAAGAGAAAGAACCAGAAGTATTGCCCTTTCAAAGATGAATCAAATGAGAAT  
CCCAAGCTGGAAGAGCTTGCCTGCATCCTGGATGAAGCATATCGCTATAACCCACAGACTC  
GCACTCTTCTCTTTGCTAAGACAAGAGCCTTAGTAGCTGCTCTCAAGAAGTGGATAGAAGC  
AAACCCTCTACTTAACCACATAAAACCAGGTGTGTTGATGGGTCTGGAAGAAGAGATCAA  
AAAACAGGTATGACCCTCCCGATGCAGAAGGGTGTACTGGATGCATTCAAAACCAACAAAG  
ACAGCAGACTGCTAATTGCTACATCTGTTGCTGATGAAGGCATTGATATTTCTGAGTGCAAC  
CTTGTTGTGCTCTATGAATACTTCGGTAATGTCACCAAAATGATCCAAGTGAGAGGTCGTG  
GAAGGGCAAGAGACAGCAAGTGCATCCTTGTGACAAACAAAAAAGAAGTGGTTGACAATG  
AGAAACAGAACCATTATAAGGAAGAAATGATGAATGAAGCTATTGAAGAGCTACAGAATTG  
GGATGAAACAACATTTGCAAGAAAGATACATGACCTGCAAATGAAGGAAAAGGTATTAAGA  
GATTCCAGGAAGAAAGACACAAGATGTAAGGCAGTGGAAGGAAAAAAAAATCTTCTCTGTG  
GAAAATGCAAAGCATATGCCTGCAGTACAGATGACATCAGAGTTATAAAGGAATCTCATCA  
CACTGTCCTAGGAGATGCGTTCAAGGAGCGTTACATAACAAAGCCTCACCAGAAACCAGTC  
CGGTTTGACTGTTTTGAGAAAAAAGCAAGATGCATTGCCAAAATACTAATTGCCAGCATGA  
CTGGGGAATCATAGTAAAGTACAAGACATTTGATGATCTACCGGTGATCAAATCAAAGCT  
TCGTAGTAGAGAATGCTGAAACTGGGGCACAAATGGATTTTCAGAAATGGAAAGATATTAA  
TTTTTCATTGAAGAATTTTGATGAAGAAACATCCAGCTGA

>guaruba\_guarouba-rig1

ATGACGGCGGAGGAGAAGAGGAACCTGCAATGCTACAGGCGCTACATCGAGAAGAGCCT  
GAACCCTGTCTACATCCTGGGCAACATGACAGCCTGGCTGTCGGACGAGGAGAAGGAGC  
GAGTCCGTAAGGAGGAGGAGAAGGGGGTGACGGCGGCCGCCGCGCTGTTCTGGATAC  
CATCTTGCTGCTGGAGGCGGAGGGCTGGCTCCGGGGCTTCCTGGATGCCCTGGTTGCAG  
CAGGTTAACTGGGCTGGCAGAAGCAGTTGAAAATTGGGACTTCAGTAAGCTGGAAAACT  
GGAATTGCACAGACAGTTGTTGAAGAGGATAGAAGCAACCATGCTAGAAGTTGATCCAGTC  
GCACTCATGCCTTACATAAACACGTGCCTGATAGAAAGGGAGTGTGATGAGATCCTGCAGA  
TTAGCGAATACAGAAGCAAAGCAGCTGGGATACTAACTCATTGAATGTCTCTGTGCATC  
AGATAAGGAAAACTGGCCAAAAAGCCTTCAGCTGGCACTGGATAACACAGGATATTACAA  
TGAAGTGAAGTATGGGATATGAGAGAAGATAACAGCAAAGATGTTGATGGTGAATGACAG

ATGACTTTAAGAACAGCTTTGAAACCACAATGACATTTTCTGAGGAGGCAGAATGTGATAAT  
AATCTCAGTGAAAATCTCTGTTCCGGGTTGAGAAGAGGTCTATCAGTCTTCGCCTGTTTATGA  
ACCAAAGAAGGCTCGGAGCTACCAGACTGAACTGGCACAGCCTGCTATCAATGGGTATAA  
CACATTGATATGTGCCCCCACAGGATCTGGAAAACTTTTGTGGCACTGATGATTTGTGAA  
CACCATTTCCAAAACATGCCCTCAGGACAAAAGGCAAAAGTTGTCTTTCTTGCAACCAAAT  
GCCAGTGTATGAACAACAGAAAAACGTATTCAAGCAGCACTTTGAAAGAAGCGGATATTCT  
GTCCAAGGAATTAGCGGTGAAACAGTTGCAAATGTCTCTGTAGAAAAGGTTATACAAGACA  
GCGACATCATTGTGCTAACACCCCAGATTCTTGTGAATAGCATCGAGGAAGGGATCCTTAG  
TTCCCTCTCCATCTTCACTCTGATGATATTTGATGAGTGCCACAACACTATGGGCAACCACC  
CTTACAATGTGTTAATGACCAGATACCTGGACCAAAAATTTGACTCCTCTGCAAGCCAACTA  
CCTCAGATTGTAGGTTTAACTGCTTCTGTTGGAGTTGGTAATGCCAAGACCACCAAGGAAA  
CAGTAGAGTACGTCTGTACTGTCTGCGCCAGCCTTGACATACAGGCCATATCTACTGTCAG  
AGAGAACAAACAGGATCTGCAGAGATTTGAAACAAACCAGAAATAGATGTCAGATGGGTG  
AAAACGAGAGCTCAAAATCACTTTGCAGGGATTATTTGAGGCCTGATGTCTGAGACAGAGG  
CATTGATGAGAAAGAATTACTCAGTGGATACTATCTCCAGATCAGCAAAAATGATTTTGA  
ACACAGAAATATGAACACTGGGTAGTTGCCACTCAGAAGAAATGTAGACTATTGCAACTGG  
AAGATAAGGAGAAGGAGAGCAGCATTTCAGAGACCTTTTCATTTGCACTGAACACCTGCG  
GAAATTCAATGATGCTCTCATCATCAGTGAAGATGCCCGCATTGAAGATGCTTTAGCCTAC  
CTAACTGATTTTTTTCAGAAATGTCAGAAATGGACCATATACAGATTTAGAGAAGCAACTTAC  
AGCCAAATTTCAAGAGAAAGAACCAAAACCTGTTAGCCCTTTCAAAGATGAAGCAAATGAG  
AATCCTAAGCTGGAAGAGCTTGCTTGCTGCTGGATGAAGCATACCACTATAACCCACAGA  
CTCGCACTATTCTCTTTGCAAAGACAAGAGCCTTAGTAGCTGCTTTGAAGAAGTGGATAGA  
AGCAAACCTCTATTTAGCCACATAAAGCCAGGTATATTGATGGGTCATGGAAGAAGAGAT  
CAAAAAACAGGTATGACCCTCCCAATGCAGAAGGATGTACTGGATGCATTCAAAACCAACA  
AAGACACCAGACTGCTAATTGCTACTTCTGTTGCTGATGAAGGCATTGATATTTCTGAGTGC  
AACCTTGTTGTGCTCTATGAATACTTTGGTAATGTCACCAAAATGATCCAAGTCAGAGGTG  
TGGAAGGGCTAAAGACAGCAAGTGCATCCTCCTGACAAACAAAACAGAAGTGGTTGAGAA  
AGAGAAACAGAACCGTTACAAGGAAGAAATGATGAATGAAGCTGTTGAAGAGCTACAGAAT  
TGGGATAAAAGAACATTTGCAGAAAAGATACATGAATTACAAAGGATGGAAAAGGTATTAC  
GAGATTCCAGGAAGAAAGAAACGAGATACAAGGTAGTGAAGGAAAGAAAAATCTTCTGTG  
TGGAAGTGCAAAGCATTGCGCTGCAGTACAGATGACATCAGAATCATAAAGGAATCTCAT  
CACACTGTCCTAGGAGATGCGTTCAAGGAGCGGTATATAACAAAGCCTCACCATAAACCAT  
GCCAGTTTGATGGTTTTGAGAAAAAAGCAAGATGCATTGCCAAAATATTAAGTCCAGCAT  
GACTGGGGAATTACAGTGAAGTACAGGACATTTGATAATCTACCAGTGCATCAAAATCAAAA  
GCTTTGTAGTAGAAAACATTGCAACTGGAACACAAATGGATTTTCAGAAATGGAAAGATATT  
AATTTTTCTCTGAAGAATTTTGATGCTGAAGAACTGTCCAGCTGA

>haliaeetus\_leucocephalus-rig1

ATGACGGCGGAGGAGAAGAGGAGCCTGCAGTGCTACAGGCGGTACATCGAGAAGAGCCT  
GAACCCCGTCTACATCCTGGGCAACATGACGGACTGGCTGTCCGACGAGGTGAAGGAGA  
GGGTCCGGAAGGAGGAGGAGAAGGGGGTGACGGCGGCCGCGCTGTTCTTGACGCG  
CGTCTGCAGCTGGAGGCGGAGGGCTGGCTGCGGGGCTTCCTGGACGCCCTGGTCGCA  
GCAGGGTACACTGGACTGGCAGAAGCAATTGAAAACCTGGGACTTCAGCAAACTGGAAAAA  
CTAGAGTTGCACAGACAGCTGTTGAAGCGGATAGAAGCAACAATGCTAGAAGTTGATCCAG  
TAGCACTCATGCCGTACATAAACATGTGCCTGATAGAAAGGGAGTGTGAGGAGATCCTGCA

GGTCAGCGAATACAGAAGCAAAGCAGCTGGGATAACTAACTCATTGAATGTCTCTGTCTGA  
TCGGATAAGGAAAACCTGGCCAAAAAGCCTTCAGCTAGCACTAGATAACACAGGATATTACA  
ACGCAAGTGAACCTGTGGGATATAAGAGAAGATAATGGCAAAGGTGTGGATGGTGAAATGA  
CAAATGCCTCTGAGAACAGCTTTGAAACCGTGGTGACATTTTCTGAAGAAGCAGAATGTGA  
TAATAATCTCAGTGAAAATCTCTGTTTCAGCTTCAGAAGGCATCTATCAGTCTTCACGTGTTT  
ATGAACCAAAGAAGGCTTGGAGCTACCAGACTGAACTTGCACAGCCTGCTATCAATGGGAA  
AAACACATTGATATGTGCCCTACAGGATCTGGAAAAACCTTTGTGGCAATTCTGATTTGTG  
AACACCATTTCCAAACATGCCCTTAGGACAAAAGGCGAAAGTTGTCTTTCTTGCAACCAAA  
GTGCCAGTGACGAACAACAGAAAACCTGTATTCAAGCAGCATTTTGAAAGAAGTGATATT  
CTGTTCAAGGAATTAGTGGTGAAACAGTTGCAAATGTCTCCGTAGAAAAGGTTATACAGGA  
CAGTGACATCATTGTGCTAACACCCAGATTCTTGTGAATAGCATCGAGGAAGGGATCCTT  
GGCTCCCTCTCCATCTTCACTCTGATGATATTTGATGAATGCCACAACACTACTGGCAATCA  
CCCTTACAATGTGTTAATGAGTAGATACCTGGAAACAAAAATTTGACTCTGCAAGCCAGCTG  
CCTCAGATTGTAGGTTTAACTGCTTCTGTTGGAGTTGGTAATGCCAAGAGCACCAAGGAAA  
CGATAGAGCACATCTGTACCCTCTGCTCCTACCTTGACATACAGGCCATATCCACTGTCAG  
AGAGAACAACTGGATCTGCAGAGATTTACAAACAAGCCAGAAACACATGTCAGATGGGTT  
AAAATGCGAGATCAGAATCACTTTGCAGACATTATCTCAGGTCTGATGTCTGAGACAGAGG  
CGTTGATGAGGAGGATTTACTCAGTGGACACTATCTCCCAAATCAACAGGAATGATTTTGG  
AACACAGAAATATGAACACTGGATAGTTGCCACTCAGAAGAAATGCAGGCTGTTGCAACTG  
GCAGATAAGGAGAAGGAGAGCAGCATTTGTAGACACCTTTTCATTTGCACTGAACACCTGC  
GGAAATTCAACGATGCTCTTATCATCAGTGAAGATGCCCGCATTGAAGATGCTTTAGCCTA  
CCTAACTGAATTTTTACAAATGTCAAAAATGGACCATATACAGAGTTAGAGAAGAACTGA  
CAGCCAAATTTCAAGAGAAAGAACCAGAACTGACTGCCCTTTCAAAGATGAGTCAAATGA  
GAATCCTAAGCTGGAAGAGCTTGCTTGCATCCTGGAGGAAGCATAACCGCTATAACCCAGA  
CACTCACACTCTTCTCTTTGCTAAGACAAGAGCCTTAGTAGCTGCTTTGAAGAAGTGATA  
GAAGCAAACCCTCTACTTAGCTACATAAAGCCAGGTGTGTTGATGGGTCGTGGAAGAAGA  
GATCAAAAAACAGGTATGACCCTCCCAATGCAGAAGGGTGTGCTGGATGCATTCAAACCA  
ACAAAGAGAACAGACTGCTAATTGCTACATCCGTTGCTGATGAAGGCATTGATATTTCTGA  
GTGCAACCTTGTTGTGCTCTACGAATACTTCGGTAATGTCACCAAAATGATCCAAGTCAGA  
GGTCGTGGAAGGGCAAAAGACAGCAAGTGCATCCTTGTGACAAGCAAAACAGAAGTGTT  
GAGAATGAGAAACACAACCGTTACAAGGAAGAAATGATGAATGAAGCTATTGAAAAGCTAC  
AGAGTTGGGATGAAACAACATTTGCAAGAAAGATACATGACCTGCAAATGAAGGAAAAGGT  
ATTACGAGACTCCAGGAAGAAAGAAACAAGAAGTAAGGTAGTGGAAGGGGAAAAAATCTT  
CTGTGTGGAATAATGCAAAGCGTATGCCTGCAGTACAGATGACATCAGAGTTATAAAGGAAT  
CTCATCACACTGTCCTAGGAGATGCGTTCAAGGAGCGTTACATAACAAAGCCTCACCATAA  
ACCAGTCCAGTTTGATTGTTTTGAGAAAAAAGCAAGATGTATTGCCAAATACTAATTGCC  
AGCATGACTGGGGAATCATAGTGAAGTACAAGACATTTGATAATCTACCAGTGATCAAATC  
AAAAGTTTTGTATTAGAGAATGTTGAACTGGGACACAAATGGATTTTCAGAAATGGAAGAA  
TATTAATTTCTCTTTGAAGAATTTTGATGTTGAAGAAACATCCAGCTGA

>heliornis\_fulica-rig1

ATGACGGCGGAGCAGAAGAAGAGCCTGCAATGCTACAGGCGTTACATCGAGAGGAGCCT  
GAACCCCGTCTTCATCCTGAGCAACATGACGGACTGGCTATCGGACGAGGTGAAGGAGAG  
GGTCCGTAAGGAGGAGGAGGAGAAGGGGGTGACGGCGGCGGCCGCACTGTTCTTGAT  
GCCATCCTGCAGCTGGAAGCGGAGGGCTGGCTCCGGGGCTTCATGGACGCCCTGTCTGC

AGCAGGTTACACTGGACTGGCAGAAGCAATTGAAAACCTGGGACTTCAGCAAACCTGGAGAA  
ACTGGAGCTGTACAGGCAGTTGTTGAAGCGAATAGAAGCAACAATGCTAGAAATTGATCCG  
GTAGCACTCATGCCCTATATAAACACATGCCTGATAGAAAGGGAGTGTGATGAGATCCTGC  
AGATTAGTGAATCCAGAAGCAAAGCATCTGGGATAACTAACTCATTGAATGTCTCTGTCTGA  
TCAGATAAGGAAAACCTGGCCAAAAAGCCTTCAGCTGGCACTAGAAAATACTGGATATTACA  
ATGCAAGTGAACCTGTGGGATATGAGAGAAGAAAATGGCAAAGATGTTCTGTTGGTGAATGTC  
AGATGCCTCTGAGAGCAGCTTTGAAACAATAACATTTTCTGAAGAAGCAGAATGTGATAATA  
ATCTCAGTGAAAATCTCTGTTTCAGCTTCAGCAAGGGTCTATCAGTCTTCAGCTGTTTATGAA  
CCAATGAAGGCTCGGACCTACCAGACTGAACTTGACAACCTGCTATCAATGGCAAAAACA  
CATTGATATGTGCACCCACAGGATCTGGAAAACTTTTGTGGCACTTATGATTTGTGAGCAC  
CATTTCCAAAACATGCCTGCAGGACAAAAGGCGAAAAGTTGTTTTCTTGCAACTAAAGTGC  
CAGTGTACCAACAACAGCAAGCTGTGTTTCAGCAGCATTTCCAAAGAAGTGGGTATAATGT  
TCAAGGAATTAGTGGTGAAACAGTTGAAATGTTTCCGTAGAAAAGGTTATAGAGCACAGT  
GACATCGTTGTGCTGACACCCAGATTCTTGTAATAGCATCGAGGAAGGGATCCTTAGCA  
CCCTCTCCATCTTCACACTGATGATATTTGATGAGTGTGACAACACCACTGGCAACCACCC  
TTACAATGTGTTAATGACCAGATACCTGGAACAAAAATTTGACTCCCCTGCAATCCCCTCC  
CTCAGATTGTAGGTTTAACTGCTTCTGTTGGAGTCGGCAATGCCAAGACCATCAACGAAAC  
GATAGAGCACATCTGTACCATTTGCTCGTACCTTGACATACAGGTCATATCCACTGTTAGAG  
AGAACATAGAGGAACTGCAGAGATATGGAAACAAGCCAGAAACACATGTCAGATGTGTTAA  
AATGCGAGCTCATAATCACTTTGCAGACATTATCTCAGGTCTGATGTGTGAGACAGAGGCA  
TCAATGAGGAAGATTTACTCAGTGGAGAGCACTACCCAGATCAACAAGAATGATTTTGGAA  
CACAGAAATATGAACAGTGGATAGTTTCCACCCAGAAGAAATGCAGACTGTTGCAACTGGA  
AGATAAGGAGAAAGAGAGCAGCATCTGTAGAGACCTTTTCATTTGCACTGAACACCTGCGG  
AAATTCAATGATGCTCTCATCATCAGTGAGGATGCCCCGCATCGAAGATGCTTTAGCCTACC  
TAATTGAATTTTTTCAAAATGTCAAAAATGGACCATACACAGAGCTAGAGAAGCAACTGACA  
GGCAAATTCGAAGAGAAAGAAGCAGAACTGACTGCCCTTTCAAAGATGAATCAAACGAGA  
ATCCCAAACCTGGAAGAGCTTGCTTGATCCTGGATGAAGCATACCACTACAACCCACAGAC  
TCGCACTCTACTCTTTGCTAAGACAAGAGCCTTAGTAGCTGCTTTGAAGAAGTGGATAGAA  
GCAAACCCTCGATTTAACTACATAAATCCAGGTGTGTTGATGGGTCTGGAAGAAAAGATC  
AAACAGGTATGACTCTTCCAATGCAGAAGGGTGTCTTGATGCATTCAAACCAACAAAGA  
CTGCAAACCTGCTGATTGCTACATCTGTTGCTGATGAAGGCATTGATATTTCTAAGTGCAACC  
TTGTTGTTCTGTATGAATACTTCGGTAATGTCACCAAAATGATCCAAGTCAGAGGTCGTGGA  
AGGGCAAAAGACAGCAAATGCATCCTTGTGACAAACAAAGCAGAAGTCGTTGAGAATGAGA  
AACACAACCTGTTACAAGGAGCACATGATGAATGAAGCAATTGAAAACCTACACAATTGGGA  
TGAAGAAAAATTTGCAAGGAAGATACATAACCTGCAAGTGAAGGAGAAGGTATTAAGAGAT  
TCCAGGAAGAAAGGCACGATTTACAAGGTAGTGGAAGGAAAAAAAAAATCTTCTCTGTGGAA  
AATGCAAAGCATATGCCTGCAGTACTGATGACATCAGAATTATAAAGGAATCTCATCACACT  
GTCATAGGAGATGCATTCAAGGAGCGTTATATAACAAAACCTCACCGGAGACCAATCCAGT  
TTGACTGTTTTGAGAAAAAAGCAAGATGCACTGCCAAAATACTAATTGCCAGCATGACTG  
GGGAATCATAGTAAAGTACAAGACATTTGATGATCTACCAGTGATCAAATCAAAGCTTTG  
TAGTAGAGCATGTTGAAACTGGGACACAAATGGATTTTCAAAGTGGAAGAAATCTTAATTTT  
TCTTTGAAGAATTTTGTGCTGAAGAAACCATCTATCTGAACTTAGAATCTTAG

>hemignathus\_wilsoni-rig1

ATGACGGCGGAGGAGAAGGAGAACCTGCGGTGCTACAGGCGCTATATCGAGAGGAGCCT

GAACCCCGTGTACATCCTCAGCAACATGACGGATTGGCTGTCCGACGAGGTGAAGGAGAG  
AGTCCGAAAGGAGGAGGAGAAGGGCGTGACGGCGGCCGCGCTGTTCTTGATGCC  
GTGCTGCTGCTGGAGGCGGAGGGCTGGCTTCGGGGCTTTCTGGATGCCCTGGTTGCAGC  
AGGTTACACTGGACTGGCAGAAGCAATTGAAAAGTGGGACTTCAGCAAAGTGGAAAACTG  
GAGCTGCACAGGCAGCTGTTGAAGCGGATAGAAGCAACAATGTTAGAAATTGATCCTGTAA  
AAATCATGCCATACATAAACACATGCCTGATAGAGAGGGAGTGTGATGAGATCCTGCAGAT  
CAGTGAACGCAAAAGCAAGGCAGCCGGGATAACTAACTCATTGAATGCCTCTGTGCTC  
GGATAAGGAAAACTGGCCCAAAAGTCTTCAGCTGGCATTGGATAATGAAGAATATTACAAT  
GCAAGTGAAGTGTGGAATATAAGAGAAGATAATGGCAAAGACATTGATGGTGAAATGACAG  
ATGCCTCTGGGAATTACTTTGAAACCATGATGACATTTTCTGAAGAAGCAGAATGTGATAAT  
CTGAGCAAAAATCTCTCTTCAGCTTCAGAAAGCATCTATGAGTCTTCATCTGTTTATGAACC  
AAAGAAGGCTCGGAGCTATCAGATTGAGCTTGCACAGCCTGCTATTGAGGGGAAAAACAC  
ATTGATTTGTGCCCCACAGGATCTGGAAAACTTTTGTGGCACTTATGATTTGTGAGCATC  
ATTTGCAAAACGTTTCCTCAGGACGAAAGGCAAAAGTTGTCTTCCTTGCAACCAAAAGTGCC  
AGTGTATGAGCAACAGACAAATGTATTGAGGCAGTATTTTGAAGAAGTGGATACTCCATTC  
AAGGAATTTGTGGTGAAACAGTTGCAAAATATCTCTGTAGAAAATGTTATACAGGACAGTGAC  
ATCATTGTGCTAACGCCCCAGATTCTTGTAATAGCATGGAGAAAGGGATCCTTAGCTCCC  
TCTCCATCTTCACGCTGATGATATTTGATGAGTGCCACAACACGACAGGCAACCACTTA  
CAATGTGTTGATGGCCAGATACCTGGATCAAAAATTTGACTCCTCTGCAACCAAGCTGCCT  
CAGATTGTAGGTTTAACTGCTTCTGTTGGAGTTGGTAATGCCAAGAGCACTAATGAACTGT  
AGAGCACATCTGTACCCTCTGCTCCTACCTTGACATACAGGCCATATCCACTGTCAGAGAG  
AACAAAGAAGATCTGCAGAGGTTTGGAAACAAGCCAGAAACACATATCAGATGGGTAAAA  
TGCGAACTCAGAATCACTTTGCAGGCATTATCTCAGGTCTGATGTCTGAGACAGAGGTGTT  
GATGAGGAAGATTTACTCAGTGGATACCATTTCCCAAATCAACAAGAATTACTTTGGAACAC  
AGAGATATGAACAGTGGATAGTTTCGACTCAGAAGAAATGCAGACTATTGCAACTGGAAGA  
TAAGGAGAAGGAGAGCAGTATTTGTAGAGACCTTTTCACTTTGTAAGCACTTGCGGAAA  
TTCAACGATGCTCTCATTATCAGTGAAGATGCCCCGATTGAAGATGCTTTAGCCTACCTAAA  
TGAATTTTTCAAAAATGTAAAAAATGGACCATTTACAGAGTTAGAGAAGCAGCTGACCGAGA  
AATTTCAAGAGAAAGAACTAGAGCTGACTGCCCTTTCAAAGATGAGTCAAATGAGAATCC  
AAAGTTGGAAGAGCTTGCTTGATCCTGGACGAAGCATACCACTATAACCCACAGACTCGT  
ACTATTCTCTTTGCCAAGACGAGAGCCTTAGTAGCTGCTTTGAAGAAGTGGATAGAAGGAA  
ACCCTCTTCTTAGCCACATAAAGCTGGATGTGTTGATGGGTAAGGGAAGAAGAGATCAGAA  
AACAGGTATGACCCTGCCAATGCAGAAGGGTGTACTGGATGCATTCAGAAATGACAAAGAC  
ATCAGACTGCTAATTGCTACATCTGTTGCTGACGAAGGCATTGATATTACTGGGTGCAACC  
TTGTGGTGCTCTATGAATACTTTGGTAATGTCACCAAAATGATCCAAGTCAGAGGTGCTGG  
AAGGGCAAGAGACAGCAAGTGCATCCTTGTGACAAGCAAAACAGAAGTGGTTGAGAATGA  
AAAAGTAAACAGTTACAAGGAAGAAATGATGAATGCAGCTATTGAAAAGCTACAGAAGTGG  
GATGAAACAACATTTGCAAGAAAGATATGTGGCCTGCAAATGAAGGAAAAGATGCTACGAG  
ATTCCAGGAAGAACAACAAAACCTGAAGTAGTGGAAGGGAAAAAAATCTTTTGTGTGG  
AAAATGCAAAGCATATGTCTGCAGTACAGATGACATCAGAATTATAAAGGAATCTCATCACA  
TTGTCTTAGGTGATGCGTTCAAGGAGCGTTATACAACAAAGCCCCACAGGAAACCTTTTCA  
GTTTGATGGTTTTGAGAAGAAAAGCAAGATGCATTGCCGAAATACTGAGTGCCAGCATGAC  
TGGGGGATCATAGTGAAGTACAAGATATTTGATAATCTACCAGTGATCAAATCAGAAGCTT  
TGTAAGTAGAGGATGTTGAAACTGGGACACAAATGGATTTTCAGAAATGGAAAAGTATTAATT

TGTCTTTGAAGAAGTTTGATGAAGAAACATCCAGCTGA

>himantopus\_himantopus-rig1

ATGACGGCGGAGCAGAAGAGGAGCCTGGAGTGCTACAGGCGGTACATCGAGAAGATCCT  
GAACCCCGTCTACATCCTGAGCAACATGACGGAGTGGCTGTCCGACGAGGTGAAGGAGAA  
AATCCGGAAGGAAGAGGAGAAGGGGGTGACGGCGGCCGCGCTGTTTCTGGATGTCA  
TCCTGCAGCTGGAGGTGGAGGGATGGTTCCGGGGCTTCCTGGACGCCCTGGGTGCAGCA  
GGTACTGTGGACTGGCAGAAGCAATTGAAAACCTGGGACTTCAGCAAACCTGGAAAACTG  
GAGTTGCACAGACAGCTGTTGAAGCGGATAGAAGCAACAATGCTAGAAGTTGATCCGGTA  
CTGCTCATGCCCTACATAAACACATGCCTAATAGAAAGGGAGTGTGACGAGATCGTACAGA  
TTAGCGAATACAGAAGCAAAACAGCTGGGATAACTAACTCATTGAATGTCTCTGTGATC  
GGATAAGGAAAACTGGCCGAAAAGCCTTCAGCTGGCACTAGATAACACAGGATATCACAA  
TCAAGTGATCTATGGGATATGAGAGAAGACAACGGCAAAGATGTTGATGGTGAAATCACAG  
ATGCCTCTGAGAACAGCATTGAAACCACGATGACATTTTCTGAAGAAGCAGAATGTGATGA  
TCTCAGTGAAAATCTCTGTTGAGCTTTAGAAGGGATCCATCAGTCTTCATCTGTTTATGAAC  
CAAAGAAGGCTCGGAGCTACCAGACTGAACTTGCACAGCCTGCTATCAGTGGGAAAAACA  
CATTGATATGTGCCCCAACAGGATCTGGAAAACTTTTGTGGCACTTCTGATTTGTGAACAC  
CATTTCCAAAACATGCCTGCAGGACAAAAGGCGAAAAGTTGTCTTTCTTGCAACTAAAGTGC  
CAGTGTACGAACAACAGAAGACGGTATTCAAGCAGCATTTTGAAAGAAGTGGATATTCTGT  
TCAAGGAATTAGTGGTGAAACAGTTGCAAATGTATCTGTAGAAAAGGTTATACAGGACAGT  
GACATCATTGTGCTGACGCCCCAGATTCTTGTAATGCCATCGAGGAAGGGATCCTTAGCT  
CCCTCTCCATCTTCACTCTGATGATATTTGATGAGTGCCACAACACTACGGGCAACCACCC  
TTACAATGTATTAATGACCAGATACCTGGAACAAAAATTTGACTCCTCTGCAGACCAGCTGC  
CTCAGATTGTAGGTTTAACTGCTTCTGTTGGAGTTGGTAATGCCAAGAGCATCATGGAAAC  
CATAGAGCACATCTGTACCCTCTGCTCCTACCTTGACATACAGGCCATATCCACTGTCAGA  
GAGAACAAAGAGGATCTACAGAGATTTGGAACAAGCCAGAAACATATGTCAGATGGGTTA  
AAATGCGAGCTCAGAATCACTTTGCAGACATTATCTCAGGTCTGATGTCTGAGACAGAAGC  
GTTGATGAGGACGATTTACTCAGTGGATACTATCTCCCAAATCAACAAGAATGATTTTGGAA  
CACAGAAATATGAACACTGGATAGTTGCCACTCAGAAGAAATGCAGACTGTTGCAACTGGA  
AGATAAGGAGAAGGAAAGCAGCATTGTAGAGACCTTTTCATTTGCACTGAACACCTGCGG  
AAATTC AACGATGCTCTCATCATCAGTGAAGATGCCCGCATCGAAGATGCTTTAGCCTACC  
TAACTGAATTTTTACAAATGTCAAAAATGGACCATATACAAAGTTAGAGAAGCAACTGACA  
GCCAAGTTTAAAGAGAAAGAACCAGAACTGACTGCCCTTTCAAAGATGAATCAAATGAGA  
ATCCCAAGCTGGAAGAGCTTGCTTG CATCCTGGACGAAGCATACCACTATAACCCAGAGAC  
TCGCACCCTTCTCTTTGCTAAGACAAGAGCCTTAGTAGCTGCCTTGAAGAAGTGGGTAGAA  
GCAAACCCTCTACTTAGCCACATAAAGCCAGATGTGTTGATGGGTCTGTGGAAGAAGAGATC  
AAAAACAAGTATGACCCTCCCAATGCAGAAGGGGGTACTGGATGCATTCAAACCAACAA  
AGACAGCAGACTGCTAATTGCTACATCTGTGCTGATGAAGGCATTGATATTTCTGAATGC  
AACCTTGTTGTGCTCTATGAATACTTCGGTAATGTCACCAAAATGATCCAAGTCAGAGGTCTG  
TGGAAGGGCAAGAGACAGCAAGTGATCCTTGTGACAAGCAAAACAGAAGTGGTTGAGAA  
TGAGAAATACAACCGTTATAAGGAAGAAATGATGAATGAAGCTATTGAGAATCTACAGAATT  
GGGATGAAACAACATTTGCAAGAACGATACATGACCTGCAAATGAAGGAAAAGGTATTACG  
AGATTCCAGGAAGAAAGCAACAAGACCTAAGGTAGTGGAAGGGGAAAAAAATCTTCTGTGT  
GGAAAATGCAAAGCGTATGCCTGCAGTACAGATGACATCAGAATTATAAAGGAATCTCACC  
ACACTGTCCTAGGAGACGCATTCAAGCAGCGTTACATAACAAAGCCTCACCACAGAGTAGT

CCAGTTTGATTGTTTTGAGAAAAAAGCAAGATGCATTGCCAAAATACGAGTTGCCAGCAT  
GACTGGGGAATTACAGTGAAGTACAAGACACTTGATAATCTACCAAGTGATCAAAATCAAAA  
GCTTTGTAGTAGAGGATGTTGAAACTGGGACACAAATGGATTTTCAGAAATGGAAAAATATT  
AATTTTTCTTTGAAGAATTTTGACATTGAAGAAACATCCAATTGA

>hirundo\_rustica-rig1

ATGACGGCGGAGGAGAAGCGTAACCTGCGGTGCTACCGGCGGTACATCGAGAGGAGCCT  
GAACCCCGTGTACATCCTCAGCAACATGACGGACTGGCTGTCCGACGAGGTGAAGGAGAG  
AGTCCGAAAGGAGGAGGAGAAGGGAGTGACGGCGGCCGCCGCGCTGTTCTTGATGCC  
GTGCTGCTGCTGGAGGCGGAGGGCTGGCTCCGGGGCTTCCTGGATGCCCTGGTTGCAGC  
AGGTTATACTGGACTGGCAGAAGCAATTGAAAAGTGGGACTTCAGCAAAGTGGAAAAAGT  
GAGCTGCACAGGCAGCTGTTGAAGCGGATAGAAGCAACAATGCTAGAAATTGATCCTGTA  
GCAATCTTGCCATACATAAACACATGCCTGATAGAGAGGGAGTGTGATGAGATCCTGCAGA  
TCAGTGAATACAGAAGCAAAGCAGCCGGGATAACTAAAGTCAATTGAATGCCTCTGTGCTC  
GGATAAGGAAAAAGTGGCCCAAAAGTCTGCAGCTGGCATTGGATGATGCAGGCTATTACAA  
CGCAAGTCAACTGTGGAATATAAGAGAAGACAGTGGCAAAGATGTTGATGGTGAAATGACG  
GATGCCTCCGAGAATCACTTTGAAACCATGATGACATTTTCTGAAGAAGCAGAATGTGATAA  
TCTCAGCGAAAAATATCTCTTCAATTTAGAAAGCATCTATGAGTCTTCATCTGTCTATGAAC  
CAAAGAAGGCTCGGAGCTACCAGATTGAGCTTGCACAGCCTGCTATTGATGGGAAGAACA  
CATTGATTTGTGCCCAACAGGATCTGGAAAAAGTGGTGGCACTTCTGATTTGTGAACAT  
CATTTGCAAAGCGTTTCTCAGAACGAAAGGCAAAAGTGGCCTTCCTTGCAACCAAAGTGC  
CAGTGTATGAGCAACAGAAAAATGTATTTAGGCAGCATTTTGAAAGAAGTGGATACTCTGTT  
CAAGGAATTTGTGGTGAAACGGTTGCAAATATCTCTGTAGAAAAAGTTATACAGGACAGTG  
ACATCACTGTGCTAACACCCAGATTCTTGTGAATAGCATGGAGAAAGGGATCCTTAGCTC  
CCTCTCCGTCTTCACTCTGATGATATTTGATGAGTGCCACAACACTACAGGCAACCACTC  
TACAATGTGTTGATGGCTAGATACCTGGATCAAAAATTAGACTCCCCTGCAAGCCAGCTGC  
CTCAGATTGTAGGATTAAGTCTTCTGTTGGAATTGGTAATGCCAAGACCACTGATGAAAGT  
GTAGACCACGTCTGTACCCTTTGCTCCTGCCTAGACATACAGGCCATATCCACTGTCAGAG  
AGAACAAGAAGATCTTCAGAGGTTTAGAAACAAGCCAGAAACACATATCAGGTGGGTTAA  
AATGCGAGCTCAGAATCACTTTGCAGACATTATCTCATATCTGATGTCTGAGACAGAGGTG  
TTGATGAGGAAGACTTTCTCAGTGGATACCATCTCCCAAATCAACAAGAATTACTTTGGAAC  
ACAGAGATATGAACACTGGATAATTTCACTCAGAGGAAATGCAGACTGTTGCAACTGGAA  
GATAAGGAGAAGGAGAGCAATATTTGTAGACACATTTTCATTTGTAAGTGAACATTTGCgGAA  
ATTCAATGATGCTCTCATTATTAGTGAAGATGCCCGCATCGAAGATGCTTTAGCCTACCTAA  
ATGAATTTTTACAAATGTAAAAAATGGACCATATACAGCGTTAGAGAAGCAACTGATGGAG  
AAATTTCAAGAGAAAGAGCAAGAGCTGACTGCCCTTTCAAAAGATGAGTCAAATGAGAATC  
CAAAGTTGGAAGAGCTTGCTTGATCCTGGACGAAGCATACCGCTATAACCCACAGACTCG  
CACTATTCTCTTTGCCAAGACAAGAGCCTTAGTAAGTGGCTTTGAAGAAGTGGATAGAAGCA  
AACCTCTACTTAGTCACATAAAGACAGATGTGTTGATGGGTAAGGGAAGAAAAGATCATA  
AAACAGGTATGACCCTGCCAATGCAGAAGGATGTACTGGATGCATTGAGAAATGACAAAGA  
TACCAGACTGCTAATTGCTACATCTGTTGCTGATGAAGGCATTGATATTACTGAATGCAACC  
TTGTGGTGCTCTATGAATACTTTGGTAATGTCACCAAATGATCCAAGTCAGAGGTCGTGG  
AAGGGCAAGAGGCAGCAAGTGCATCCTTGTGACGAGCAAAACAGAAGTGGTTGAGAATGA  
AAAACAAAACAGTTACAAGGAAGAAATGATGAATGCAGCTATCGAAAAGCTACAGAACTGG  
GATGAAGCAAAATTTGCAAGAAGGATACATCAGCTGCAAATCAAAGAAAAGATACAACGAG



ATTCCAGGAGGAATGAAACAAAACATAAAGTAGTCGGGGGGGAAAAAAACCTTTTTGTGTGG  
AAAATGCAAAGCCTATGTCTGCAGTACAGATGATATCAGAATTATAAAGGAATCTCATCATA  
CTGTCCTAGGTGACGCATTCAAGGAGCGTTATATATCAAAGCCCCACAGGAAACCAGTTCA  
GTTTGATGGTTTTGAGAAAAAAGCAAGATGCATTGCCGAAATATTGAGTGCCAGCATGAC  
TGGGGGATCACAGTGAAGTACAAGACATTTGATAATCTACCAGTGATCAAATCAGAAGCT  
TTGTACTAGAGAATGTTGAAACTGGGACACAAATGGATTTTCAGAAATGGAAAAGTATTAAT  
TTATCTTTGAAGGATTTTGATGAAGAAACATCCAGCTGA

>hydrobates\_tethys-rig1

ATGACCGCGGAGGAGAAGGGGAGCCTGCGGTGCTACAGGCAGTACATCGAGACGACTCT  
GAACCCCGTCTACGTCTGGGCAACATGACGGCCTGGCTGCCCCACGAGGTGAAGGAGA  
GGGTCCGGAAGGAGGAGGAGAAGGGGGTGACGGCGGCCGCCGCGCTGTTCTGGATGC  
CATCCTGCAGCTGGAGGCGGAGGGATGGTTCCGGGGGCTTCTGGACGCCCTGGTTGCAG  
CAGGGTATACGGGACTGGCAGAAGCAATCGAAAACCTGGGACTTCAGCAAACCTGCAGAAAC  
TGGAGTTGCACAGACGGCTGTTGAAGCAGATAGAGGCAACAATGCTAGAAGTTGATCCGG  
TAGCACTCATGCCCTCCATAAATACATGCCTGATAGAAAGGGAGTGTGATGAGATCCTGCA  
GATTAGTGAATGCAGAAGCAAAGCAGCCGGGATAACTAACTCATTGAATGTCTCTGTCTGA  
TCGGATAAGGAAAACCTGGCCGAAAAGCCTTCAGCTGGCACTAGATAACGCAGGATATTACA  
ATGCAAGTGAACGTGTGGGATATGAGAGAAGATAATGGCAAAGATGTTGAAATGACAGATGC  
CTCTGAGAACAGCTTTGAAACCGTGATGACATTTTTTTGAAGAAGCAGAATGTGATAATAATC  
TTAATGAAAATCTCTGTTTCAGCTTCAGAAGGGATCTATCAGTCTTCACCTGTTTATGAACCA  
GAGAAGGCTCGGAGCTACCAGACAGAACTTGCGCAGCCTGCTATCAACGGGAAAAACACA  
TTGATATGTGCACCCACAGGATCTGGAAAACTTTTGTGGCACTTCTGGTTTGTGAACACC  
ATTTCCAAAACATGCCACAGGACGAAAAGGCAAAAGTTGTCTTTCTTGCAACTAAAGTGCC  
AGTGTACGAACAACAGAAAACTGTATTCAAGCAGCATTTTTGAAAGAAGTGGATATTCTGTTT  
AAGGAATTAGTGGTGAAACAGTTGCAAATGTCTCTGTAGAAAAGGTTATACAGGACAGTGA  
CATCATTGTGCTGACGCCCCAGATTCTTGTGAATAGCATCGAGGAAGGGATCCTTAGCTCC  
CTTTCCATCTTCACGCTGATGATATTTGATGAGTGCCACAACACTACGGGCAACCACCCTT  
ACAATGTGTTAATGAACCGATACCTGGAACAAAAATTTGACTCCTATACAAGCCAGCTGCCT  
CAGATTGTAGGTTTAACTGCTTCTGTTGGAGTTGGTAATGCCAAGAGCATCAAGGAGACAA  
TAGAGCACATCTGTACCCTCTGCTCCTACCTTGACATACAGGCCATATCCACTGTCAGAGA  
GAACAAACAGGATCTGCAGAGATTTGGAACAAGCCAGAAACAGATGTCAGATGGGTAAA  
ATGCGAGTTCAGAATCACTTTGCAGAGGTGATCTCAGGTCTGATGTCTGAGACAGAGGCAT  
CGATGAGGAAGATTTACTCATTGGATACTACCTCTCAAATCAACAAGAATGATTTTGAACA  
CAGAAATATGAACACTGGATAGTTGCCACTCAGAAGAAATGCAGACTGTTGCAACTGCCGG  
ATAAGGAGAAGGAGAGCAGCATTGTAAAGACCTTTTCATTTGCACTGAACACCTGCGGAA  
ATTCAACGATGCTCTCATCATCAGTGAAGATGCCCGCATCGAAGATGCTTTAGCCTACCTA  
ACTGAATTTTTACAAATGTCAAAAATGGACCATATACTGAGTTAGAGAAGCAACTGACAGC  
CAAATTTCAAGAGAAAGAACCAGAACTGACTGCCCTTTCAAAGATGAATCAAATGAGAATC  
CCAAGCTGGAAGAGCTTGCTTGCATCCTGGATGAAGCATACCGCTATAACCCACAGACTC  
GCACTCTTCTCTTCGCTAAGACAAGAGCCTTAGTAGCTGCTTTGAAGAAGTGGATAGAAGC  
AAACCTCTACTTAGCCACATAAAGCCAGGTGTGTTAATGGGTCTGGAAGAAAAGATCAA  
AAACAGGTATGACCCTCCCAATGCAGAAGGGTGTACTGGATGCATTCAAACCAACAAAG  
ACAGCAAACACTACTAATTGCTACATCTGTTGCTGACGAAGGCATTGATATTTCTGAGTGCAAC  
CTTGTTGTGCTCTATGAATACTTCGGTAATGTCACCAAAATGATCCAAGTCAGAGGTCGTG

GAAGGGCAAAAGACAGCAAGTGCATCCTTGTGACAAGCAAAACAGAAGTGGTTGAGAATG  
AGAAACACAACCGTTATAAGGAAGAAATGATGAATGAAGCTATTGAAAAGCTACAGAATTG  
GGATGAAACAACATTTGGAAGAAAGATACATGACCTGCAAATGAAGGAAAAGGTATTACGA  
GATTCCAGGAAGAAAGAAACAAGACCTAAGGTAGCGGAAGGGAAAAAAATCTTCTGTGTG  
GAAAATGCAAAGCATATGCCTGCAGTACAGATGACATCAGAGTTATAAAGGAATGTCATCA  
CATTGTCCTAGGAGATGCATTCAAGGAGCGTTACATAACAAAGCCTCACCAGAAACACGC  
CAGTTTGATTGTTTTGAGAAAAAAGCAAGATGCATTGCCAAAATACTAATTGCCAGCATGA  
CTGGGGAATCATAGTGAAGTACAAGACACTTGATAATCTACCAGTGATCAAATCAAAGCT  
TTGTAGTAGAGAACGTTGAAACTGGGACACAAATGGATTTTCAGAAATGGAAAAATATTAAT  
TTTTCTTTGAAGAATTTTGATGTTGAAGAAACGTCCAGCTGA

>junco\_hyemalis-rig1

GTGACGGCGGAGGAGAAGCAGAACCTGCAGTGCTGCAGGCGCTACATCGAGAGGAGCCT  
GAACCCCGTGATACCTCAGCAACATGACGGAATGGCTGTCCGACGAGGTGAAGGAGAG  
AGTCCGCAAGGAGGAGGAGGAGaAGGGCGTGACGGCGGCCGCGCTGCTGTTCTGGATG  
CCGTGCTGCTGCTGGAGGCGGAGGGCTGGCTCCGGGGCTTTCTGGATGCCCTGGTTGCA  
GCAGGTTACACTGGACTGGCAGAAGCAATTGAAAACCTGGGATTTTCAGCAAACCTGGAAAAAC  
TGGAGCAGCACAGGCAGCTGTTGAAGCGGATAGAAGCAACAATGCTAGAAATTGATCCAG  
TAGCAATCATGCCATACATAAACACATGCCTGATAGAGAGGGAGTGTGATGAGATCATGCA  
GATCAGTGAAAACAGAAGCRAGGCAGCCGGGATAACGAAACTCATTGAATGCCTCTGTGCG  
CTCGGATAAGGAAAACTGGCCCAAAAGTCTTCAGGTGGCATTGGATAGTGCTGAATATTAC  
AATGCAAGTGAACCTGTGGAATATAAGAGAAGATAATGGCAAAGACATTGATGGTGAAATGA  
CAGATGCCTCTGAGAATTACTTTGAAACCATGATGACATTTTCTGAAGAAGCAGAATGTGAT  
AATCTGAGCAAAAATCTCTCTTCAGTTTCAGAAAGCATCTATGAGTCTTCATCTGTTTATSAA  
CCAAAGAAGGCTCGGAGCTACCAGATTGAGCTTGCACAGCCTGCTTTTTGGTGGA AAAAC  
ACATTGATTTGTGCCCCACAGGATCTGGAAAACTTTTGTGGCACTTATGATTTGTGAACA  
TCACTTGCAAAACGTTCCCTCAGGACGAAAGGCAAAAGTTGTCTTCCTTGCAACCAAAGTG  
CCAGTGTATGAGCAACAGAAAAATGTATTCAGGCAGCATTTTGAAGAAGTGGATACTCTG  
TTCAAGGAATTTGTGGTGAAACAGTTGCAAATATCTCTATAGAAAATGTTATACAGGACAGT  
GACATCATTGTGTTAACGCCCCAGATTCTTGTGAATAGCATGGAGAAAGGGATCCTTAGCT  
CCCTCTCTGTCTTCACTCTGATGATATTTGATGAGTGCCACAACACTACAGGCAACCAACC  
TTAYAATGTGTTGATGACCAGATACCTGGATCAAAAATTTGACTCCTCTGCAAACCAGCTAC  
CTCAGATTGTAGGTTTAACTGCTTCTGTTGGAGTTGGTAATGCCAAGAGCACTAATGAAACT  
GTAGAGCACATCTGTACCCTCTGCTCCTACCTTGACATACAGGCCATATCCACTGTCAGAA  
AGAACAAGAAGATCTGCAGAGGTTTCAAACAAGCCAGAAACACATATCAGATGGGTTAA  
AATGCGAGCTCAGAATCACTTTGCAGACATTATCTCAGGTCTGATGTCTGAGACAGAAATG  
TTGATGAGGAAGATTTACTCAGTGGATTCCATCTCCCAAATCAACAAGAATTACTTTGGAAC  
ACAGAGATATGAACAGTGGATAGTTTCCACTCAGAAGAAATGCAGACTGTTGCAACTGGAA  
GACAAGGAGAAGGAGAGCAGTATTTGTAGAGACCTTTTCATCTGTACTGAGCACTTGCGGA  
AATTCAACGATGCTCTCATTATCAGTGAAGATGCCCGCATTGAAGATGCTTTAGCCTACCTA  
AATGAATTTTTCACAAATGTAAAAAACGGACCATTACAGAGTTAGAGAAGCAGCTGACGGA  
GAAATTTCAAGAGAAAGAACAAGAGCTGAATGCCCTTTCAAAGATGAGTCAAATGAGAAT  
CCAAAGTTGGAAGAGCTTGCTTGCAATTCTGGATGAAGCATACCACTATAACCCAGAGACTC  
GCACCATTCTCTTTGCCAAGACAAGAGCCTTAGTAGCTGCTTTGAAGAAGTGGATAGAAGG  
AAACCCTCTTCTTAGCCACATAAAGCCAGATGTGTTGATGGGTAAAGGAAGAAGAGATCAG

AAACAGGTATGACCTTGCCAATGCAGAAGGGTGTACTGGATGCATTCAGAAATGACAAAG  
ACATCAGACTGCTAATTGCTACATCTGTTGCTGAYGAAGGCATTGATATTACTGAGTGCAAC  
CTTGTGGTGCTCTATGAATACTTTGGAAATGTCACCAAAATGATCCAAGTCAGAGGTCGTG  
GAAGGGCAAGAGACAGCAAGTGCATCCTTGTGACAAGCAAGACAGAAGTGGTTGAGAATG  
AAAAACGAAACAGTTACAAGGAAGAAATGATGAATGCAGCTATTGAAAAGCTACAGAACTG  
GGATGAAACAACATTTGCAAGAAAGATACGTGGCCTGCAAATGAAGGAAAAGATGGTACGA  
GATTCCAGGAAGAACAACAAAACAAAACAAGAAATAGTAGAAGGGGAAAAAAATCTTTTGTGTG  
GAAAATGCAAAGCATATGTCTGCAGTACAGATGACATCAGAATTATAAAGGAATCTCATCAT  
ACTGTCTTAGGTGATGCATTCAAGGAGCGTTATACAACAAAGCCCCACAGGAAACCTTTGC  
AATTTGATGGTTTTGAGAAAAAAGCAAGATGCATTGCCGAAATACTGAGTGTGAGCATGA  
CTGGGGGATCATAGTGAAGTACAAGATATTTGACAATCTACCAGTGATCAAATCAGAAGC  
TTTGTACTAGAGGATGTTGAAACAGGGACACAAATGGATTTTCAGAAATGGAAAAGTATTAA  
TTTGTCTTTGAAGGAGTTTGATGAAGAAACATCCAGCTGA

>lamprotornis\_superbus-rig1

ATGACGGCGGAGGAGAAGCAGAACCTGCGCTGCTACCGGCGCTACATCGAGAGGAGCCT  
GAACCCCGTGCTACGTCTCAGCAACATGACGGACTGGCTGTCCGACGAGGTGAAGGAGA  
GGGTTCCGAAGGAGGAGGAGAAGGGGGTGACGGCGGCCGCCGCGCTGTTCTGGATGC  
CGTGCTGCTGCTGGAGGCGGAGGGCTGGCTCCGGGGCTTCCTGGATGCCCTGGTTGCAG  
CAGGTTACACTGGATTGGCAGAAGCAATTGAAAAGTGGGACTTCAGCAAGCTGGAAAACT  
TGAGCTGCACAGGCAGCTATTGAAGCGGATAGAAGCAACAATGCTAGAAATTGATCCTGTA  
GCAATCATGCCATACATAAACACATGCCTGATAGACAGGGATTGTGATGAGATCCTGCAGA  
TCAGTGAATACAGAAGCAAAGCAGCTGGGATAACCAAATCATTGAATGCCTCTGTGCTC  
CGATAAGGAAAACTGGCCCAAAAGTCTTCAGCTGGCACTGGATAATGCAGGATATTACAAT  
GCAAGTGAAGTGTGGAATATAAGAGAAGATAATGGCAAAGATGTGGATGGTGAAATGACAG  
ATGCCTCGGAGAATTACTTTGAAACCATGATGACATTTTCTGAAGAAGCAGAATGTGATAAT  
CTTGGTGAAAATCTCTCTTCAGTTTCAGAAAGCGCCTGTGAGTCTTCATCTGTTTATAAACC  
AAAGGCTCGGAGCTACCAGATTGAGCTTGACAGCCTGCTATTGATGGGAAAAACACATTG  
ATTTGTGCCCCACAGGATCTGGAAAACTTTTGTGGCACTTCTGATTTGTGAACATCATTT  
GCAAAACGTTCCCTCGGGACAAAAGGCAAAAGTTGTCTTCCTTGCAACCAAAGTGCCAGTG  
TATGAGCAACAGAAAAATGTATTCAGGCAGCATTTTGAAGAAGTGGATACTCTGTTCAAG  
GAATTTGTGGTGAAACAGTAGCAAAATATCTCTATAGAAAATGTTATACAGGACAGTGACATC  
ATTGTGCTAACTCCCCAGATTCTTGTGAATAGCATGGGGAAAGGGGTCCTTAGCTCCCTCT  
CCATCTTCACTCTGATGATATTTGATGAGTGCCACAACACTACAGGCAACCACCCTTACAAT  
GTGTTGATGACCAGATACCTGGATCAAAAATTTGACTCCTCTGCAAACCGGCTGCCTCAGA  
TTGTAGGTTTAACTGCTTCTGTTGGAGTTGGTAATGCCAAGACCATTAATGAAACTGTGGAG  
CACATCTGTACCCTCTGCTCCTACCTGGACATACAGGCCCTATCCACTGTCAGAGAGAACA  
AAGAAGATCTGCAAAGGTTTGGAAACAAGCCAGAAACACATATCAGATGGGTAAAAATGCG  
AGCTCAGAATCACTTTGCAGACGTTATCTCAGGTCTGATGTCTGAGACAGAGATGTTGATG  
AGGAAGATTTACCCAGTGGATACCATCTCCCAAATCAACAAGAATTACCTTGAACACAGA  
GATATGAACAATGGATAGTTTCTACTCAGAAGAAGTGTAGACTATTGCAACTGGAAGATAAG  
GAGAAGGAGAGCAGTATTTGTAGAGACCTTTTCATTTGTAAGTACTGAGCACTTGGGAAATTCA  
ACGATGCTCTGATTATCAGTGAAGATGCCCGCATCGAAGATGCTTTAGCCTACCTAAGTGA  
ATTTTTACAAATGTAAAAAATGGACCGTATACAGAGCTGGAGAAGCAACTGACGGAGAAA  
TTTCAAGAAAAAGAACTAGAACTGACTGCCCTTTCAAAGATGAGTCAAATGAGAATCCAAA

GTTGGAAGAGCTTGCTTGCATCCTGGACGAAGCATACCGCTATGACCCAGAGACTCGCAC  
CATTCTCTTTGCCAAGACAAGAGCCTTAGTAGCTGCTTTGAAGAAGTGGATAGAAGCAAAC  
CCTTTACTTAGCCACATAAAGCCAGATGTGTTGATGGGTAAGGGAAGAAGAGACCATAAAA  
CAGGTATGACCCTGCCAATGCAGAAGGGTGTACTGGATGCATTGAGAAATGACAAAGACAT  
CAGACTGCTAATTGCTACATCTGTTGCTGATGAAGGCATTGATATTACTGCGTGCAACCTTG  
TGGTGCTCTATGAATACTTTGGTAATGTCACCAAAATGATCCAAGTCAGAGGTCGTGGAAG  
GGCAAGAGACAGCAAGTGCATCCTTGTGACAAGCAAAACAGAAGTGGTTGAGAATGAAAA  
ACTAAACCGTTACAAGGAAGAAATGATGAATGCAGCTATTGAAGAGCTACAGAACTGGGAC  
GAAACAACATTTGCAAGAACGATATGTTGCCTGCAAAGGAGGGAAAAGGTACTACGAGATT  
CCAAGAAGAACGAAACAAAACCTGAAGTAGTGGAAGGGAAAAAAAATCTTTTGTGTGAAA  
ATGCAAAGTGTACGTGTGCAGTACAGATGACATCAGAATTATAAAGGAATCTCATCACACT  
GTCCTGGGTGACACGTTCAAGGAACGTTATATAACAAAACCGCACAGGAAGCCAGTTCAGT  
TTGATGGTTTTGAGAAAAAAGCAAGATGCATTGCCGAAATGCTGAGTGCCAGCATGACTG  
GGGGATCACAGTGAAGTACAAGACATTTGATAATCTACCAGTGATCAAAATCAAAAGCTTTG  
TACTAGAGGACATTGAAACTGGGACACAAATGGATTTTCAGAAATGGAAAAGTATTAATTTG  
TCTTTGAAGGATTTTGATGAAGAAACATTGAGCTGA

>lepidothrix\_coronata-rig1

ATGACGGCGGAGGAGAAGAGAAACCTGCGCTGCTACAGGCGGTACATCGAGAGGATCCT  
GAACCCCATCTACATCCTGAGCAACATGACGGACTGGATGTCGGACGAGATGAAGGAGAG  
AGTGCGAAAGGAGGAGGAGAAGGGGGTGACGGCGGCCGCGCTGTTCTGATACC  
ATGCTGCTGCTGGAGGCGGAAGGCTGGCTCCGGGGCTTTCTGGACGCCCTTGTTGCAGC  
AGGTTACACTGGACTGGCAGAAGCAATAGAAAAGTGGGACTTCAGTAACTGGAAAACTG  
GAACTGCACAGACAGCTGTTGAAGCGGATAGAAGCAACAATGCTAGAAATTGACCCAGTA  
GCACTCATGCCTTACATAAACACATGCCTGATAGAGAGGGAGTGTGATGAGATCCTGCAGA  
TTTGTGAATACAGAAGCAAAGCAGCGGGGATAACTAACTCATTGAATGTCTCTGTGCTC  
GGATAAGGAAAACTGGCCGAAAAGTCTTCAGCTGGCATTGGATATGGCAGGGTATTACAAT  
GCAAGTGAAGTGTGGAATTTAAGAGAAGATAATGGCAAAGATGTTGATGGTGAAATGACAG  
GTGCCTCTGAGAATTGCTTTGAAACCACAATTACATTTGCTGAAGAAGCAGAGTGTGATAAT  
AATCTCAGTGAAAATCTTTCTTCGGGTTGAGGAATGGTCCATCAGTCTTCATCTGTTTATGA  
ACCAAAGAAGGCTCGAACCTACCAGACTGAACTTGCGCAGCCTGCTATCAATGGGAAAAA  
CACATTGATATGTGCCCTACAGGATCTGAAAAAAGTCTTTGTGGCGCTTCTGATTTGTGAAC  
ACCATTTGCAAAACGTGCCCTCTGAAAAAAGCCAAAAGTTGTCTTTCTTGCAACCAAAGT  
GCCAGTGTATGAACAACAGAAAAATGTATTCAGACAGCATTTTGAAGAAGTGGATATTCTG  
TTCAAGGAATATGTGGTGAACAGTTGCAAACGTCTCAGTAGAACACGTTATACAGGACAG  
TGACATCATTGTGCTCACGCCCCAGATTCTTGTAATAGCATCGAGACTGGGATCCTTAGC  
TCTCTCTCCATCTTCACTCTGATGATATTTGATGAGTGTGACAACACCACAGGCAACCACCC  
TTACAATGTGTTAATGACCAGATACCTGGAACAAAAATTTAACTCCTCTGCAAAACCAACTGC  
CTCAGATTGTAGGTTTAACTGCTTCTGTTGGAGTTGGTAATGCCAAGAACATCAAGGAACT  
GTAGAGCACATATGTACCCTCTGTTCTGCCTTGACATACAGGCCATATCCACTGTCAGAG  
AGAACAAGAGGATCTGCAGAGATTGAGAAACAAGCCAGAATCACATGTCAGATGGGTTAA  
AATGCGAGCTCAGAATCACTTTGCAGACATTATCTCAGGTCTGATGTCTGAAACAGAGGCG  
ATGATGAGGAAGATTTACTCATCAGATACTATCTCCCAAATCAACAAGAATGATTTTGAAC  
ACAGAAATATGAACAGTGGATAGTTCTAACTCAGAAGAAATGCAGACTGTTGCAGCTGGCA  
GATAAAGAGAAGGAGAGCAACATTTGTAGAGACCTTTTCATTTGTACCGAACACTTGCGGA

AATTCAACGATGCTCTCATTATCAGTGAAGATGCACGCCTCGAAGATGCTTTAGCCTACCTA  
AATGAATTTTTACGAATGTGAAAAATGGACCATATACAGAGTTAGAGAAGCAACTGACAGA  
CAAATTTCAAGAGAAAGAACCAGAACTGACTGCCCTTTCAAAGATGAATCAAATGAGAATC  
CCAAGCTGGAAGAGCTTGCTTCCATCCTGGACGAAGCATAACCGCTATAACCCACAACTCG  
CACTATTCTCTTTGCCAAGACAAGAGCCTTAGTAGCCGCTTTGAAGAAGTGGATGGAAGCA  
AACCTCTACTTAGCCACATAAAGCCAGATGCGTTGATGGGTCAGGGAAGAAAAGAACATA  
AAACAGGTATGACCCTGCCAATGCAGAAGGGTGTGCTGGATGCCTTCAAAGCGACAAAG  
ACAGCAGACTGCTAATTGCTACATCCGTTGCTGATGAAGGCATTGATATTTCTGAGTGCAA  
CCTTGTTGTGCTCTATGAATACTTCGGTAATGTCACCAAAATGATCCAAGTCAGAGGTCGT  
GGAAGGGCAAAGACAGCAAGTGCGTCCTTGTGACAAGCAAAGTGGAGGTGGTTGAGAAT  
GAAAAACAGAACCATTATAAGGAAGAAATGATGAATGCAGCTATTGAAAACCTGCAGAACT  
GGGATGAAACAACATTTGCAAGAAAGATACGTGACCTGCAAGTGAAGGAAAAGGTATTACG  
AGATTGCAGGAAGAAAGAACTATAAAACATGAAGTAGTGAAGGGAAAAAAATCTTCTG  
TGTGGAAAATGCAAAGCCTATGCCTGCTGTACAGATGACATCAGAATTATAAAGGACTCTC  
ATCACACTGTCCTAGGAGATGCATTCAAGGAGCGTTATATAATGAAGCCTCACCAGAAACC  
ACGTCCATTTGATGTTTTTGAGAAAAAGAGCAAGATGCATTGCCAAAAAACTAATTGCCAGC  
ATGACTGGGGGATCACAGTGAAGTACAAGACATTTGATAATCTACCAATCATCAAAATCAGA  
AGCTTTGTAGTAGAGGACATTGAAACTGGGACACAGATGGATTTTCAGAAATGAAAAATA  
TTAATTCTTCTTTGAAGAATTTTGATGAAGAAACATCCAGCTGA

>lichenostomus\_cassidix-rig1

ATGACGGCGGAGGAGAAGCAGAACCTGCGGTGCTACCGGCGGTACATCGAGAGGAGCCT  
GAACCCCGTGATACCTGAGCAACATGACGGACTGGCTGTCGGACGAGCTGAAGGAGC  
GGGTCCGAAAGGAGGAGGAGAAGGGGGTGACGGCGGCCGCCGCGCTGTTCTGGATGC  
CATGCTGCTGCTGGAGGCGGAGGGCTGGCTGCGGGGCTTCCTGGACGCGCTGGTCGCA  
GCAGGTTACACTGGACTGGCAGAAGCAATCGAAAACCTGGGACTTCAGCAAACCTGGAAAAA  
CTGGAGCTGCACAGGCAGCTGTTGAAGCGGATAGAAGCAACAATGCTAGAAGTTGATCCA  
GTAGCACTCATGCCATACATAAACACATGCCTGCTAGAGAGGGAGTGTGATGAGATCCTGC  
AGATCAGTGAATACAGAAGCAAAGCAGCTGGGATAACTAACTCATTGAATGCCTCTGTGC  
CTCGGATAAGGAAAACTGGCCAAAAAGTCTTCAGCTGGCATTGGATAATGCAGGATATTAC  
AATGCAAGTGAAGTGTGGAATATAAGAGAAGATAATGGCAAAGATATTGATGGTGAAATGA  
CCGATGCTTCTGAAAACTATGAAACCATGGTGACATTTTCTGAAGAAGCAGAATGTGATAAT  
CTCAGTGAAAATCTCTCTTCAGTTCAGAAAAGGTCTGTGAGTCTTCATCTGTTTATGAACC  
AAAGAAGGCTCGGAGCTACCAGATTGAGCTTGACACAGCCTGCTATCAATGGGAAAAACAC  
ATTGATTTGTGCCCCACAGGATCTGGAAAAACTTTTGTGGCACTTCTTATTTGTGAACATC  
ATTTGCAAACGTTCCCTTAGGACGAAAGGCCAAAAGTTGTCTTCCTTGCAACAAAAGTGCC  
TGTATATGAGCAGCAGAAGGACGTATTCAGGCAGCATTTTGAAAGAAGGGGATATTCTGTT  
CAAGGAATTTGTGGTGAAACAGCTGCAAATATCTGTGTAGAAAGTGTTATTCAGGACAGTG  
ACATCATTGTGTTAACACCCCAGATTCTTGTGAATAGCATGGGAAAAGGGATTCTTAGCTCC  
CTGTCCATCTTCACTCTGTTGATATTTGATGAGTGCCACAACACTACAGGCAACCACCCTTA  
CAATGTGTTGATGACCAGATACCTGGATCAAAAATTTGACTCCTCTACAAACCCGCTGCCT  
CAGATTGTAGGTTTAACTGCGTCTGTAGGAGTTGGTAATGCCAAGACTGTCGATGAAACCG  
TAGAGCACATCTGTACCCTCTGCTCCTACCTTGACATACAAGCCATATCCACTGTCAGAGA  
GAACAAACAAGATCTGCAGAGATTCAGAAACAAGCCAGAAACACATGTCAGATGGGTTAA  
ATGCGAGCTCAGAAATCCCTTTGCAGACATTATCTCTGGTCTGATGTCTGAGACAGAGGCGT

TGATGAGGAAGATTTACTCAGTGGATACCATCTCCCAAATCAACAAGGTTGACTTTGGAAC  
ACAGAAATATGAACAATGGATAGTCTCCACTCAGAGGAAATGCAGACTGTTGCAACTGGAA  
GATAAGGAGAAGGAGAGCAACATTTGTAGAAACCTTTTCATTTGTAAGTGAACACTTGCGGA  
AATTCAATGACGCTCTCATTATCAGTGAAGATGCCCCGTATCGAAGATGCTTTAGCCTACCTA  
AATGAATTTTTACAAATGTAAAAAATGGACCATATACTGAGTTAGAGAAGCAGCTGACGGA  
CAAATTTCAAGAGAAAGAAACAGAGCTGACTGCCCTTTCAAAGATGAGTCAAATGAGAAT  
CCAAAGCTGGAAGAGCTTGCTTGCATCCTGGACGAAGCATATCGCTATAACCCAGAGACTC  
GCACGATTCTCTTTGCCAAGACAAGAGCCTTAGTAGCTGCTTTGAAGAAGTGGATAGAAGC  
AAACCCTCTACTTAGCCACATAAAGCCAGATATGTTGATGGGGAAGGGAAGAAAAGATCAT  
AAAACAGGTATGACCCTGCCAATGCAGAAGGGGGTACTGGAAGCATTGAGAAATGACAAA  
GACATCAGACTGCTAATTGCTACATCTGTTGCTGATGAAGGCATTGATATTACTGAGTGCAA  
CCTTGTGGTGCTCTATGAATACTTTGGTAACGTCACCAAATGATCCAAGTCAGAGGTCGT  
GGAAGGGCAAGAGACAGCAAGTGCATTATTGTGACAAGCAAAACAGAAGTGGTTGAGAAT  
GAAAAACAGAACAATTACAAGGAAGAAATGATGAATGCAGCTATTGAAAATCTACAAGACTG  
GGATGAAACAACATTTGCCAGAGAGATACATGGCCTGCAAATGAAGGAAAAGGTACTACGA  
GATTCCAGGAAGAAAGAAACAAAACAAAAAGTAGTGGAAGGGAAAAAAATCTTTTGTGTG  
GAAAATGCAAAGCATATGTCTGCAGTACAGATGACATCAGAATTATAAAGGAATCTCATCAC  
ACTGTCCTAGGTGATGCATTCAAGGAACGTTACATAACAAAGCCCCACGGGAAACCAATTC  
AGTTTGATGGTTTTGAGAAAAAAGCAAGATGCATTGCCGAAATACCACCTGCCAGCATGA  
CTGGGGGATCACAGTGAAGTACAAAACATTTGATAATATACCAGTGATCAAAATCAAAGCT  
TTGTGCTAGAGAACATTGAAACTGGGGCACAAATGGATTTTCAAATGGAAGACATTAAT  
TTGTCTTTGAAAAATTTTGATGAAGAAACATCCAGCTGA

>limosa\_lapponica-rig1

ATGACGGCGGAGGAGAAGAGGAGCCTGCAGTGCTACAGGCGGTACATCGAGAAGAGCCT  
GAACCCCGTCTACATCCTGAGCAACATGACGGAGTGGCTGTCGGACGAGGTGAAGGAGA  
GGATCCGTAAGGAAGAGGAGAAGGGGGTGACGGCGGCCGCGCTGTTTCTGGATGTC  
ATCCTGCAGCTGGAGGCGGAGGGATGGTTCCAGGGCTTCATCGACGCCCTGGCTGCAGC  
AGGTTACACTGGACTGGCAGAAGCCATTGAAAAGTGGGACTTCAGCAAAGTGGAAAACTG  
GAGCAGCACAGGCAGCTGTTGAAGCGGATAGAAGCAACGATGCTAGAAGTTGATCCGGTG  
GCACTCATGCCCTACATAAACACGTGCCTGATAGAAAGGGAGTGTGATGAGATCCTGCAG  
ATTAGCGAATACAGAAGCAAAACAGCTGGGATAACTAACTCATTGAATGCCTCTGTGAT  
CGGATAAGGAAAAGTGGCCGAAAAGCCTTCAACTGGCCCTAGATTCCAGAGAATATTATAA  
TGCAAGTGAGCTGTGGGGTATGAGAGAAGATAATGGCAAAGATGTTGATGGTGAAATCACA  
GATGCCTCTGAGGACAGCTTTGAAACCACGATGACATTTTCTGAAGAAGCAGAATGTGATA  
ACAATCTCAGTGAAAATCTCTGTTGAGCTCTAGGAGGGATCGAGCAGCCTTCACCTGTTTA  
TGAACCAAAGAAGGCTCGGAGCTACCAGATTGAACTTGTGCAGCCTGCTATCAGTGGGAA  
AAACACAGTGATATGTGCCCCACAGGATCTGGAAAACTTTTGTGGCACTTCTGATTTGT  
GAACACCATTTCCAAAACATGCCTGCAGGACGAAAGGGGAAAGTTGTCTTTCTTGCAACTA  
AAGTGCCAGTGTATGAACAACAGAAAAGTGTATTCAAGCAGCACTTTGAAAGAAGTGGATA  
TTCTGTTCAAGGAATTAGTGGTGAGACAGTTGCAAATGTCTCTGTAGAAAAGTTATACAGA  
ACAGTGACATCATTGTGCTGACGCCCCAGATTCTTGTGAATAGCATCGAGGAAGGGATCCT  
TAGCTCCCTCTCCATCTTCACTCTGATGATTTTGATGAGTGCCACAACACTACGGGCAAC  
CACCTTACAATGTGTTAATGACCAGATACCTGGAACAAAAATTTGACCCCTCTGCAAAGCA  
GCTGCCTCAGATTATAGGTTTAACTGCTTCTGTTGGAGTTGGTAATGCCAAGAACGTCAAG

GAAACAATCGAGCACATCTGTACCCTCTGCTCCTACCTTGACATACAGGCCATATCCACTG  
TCAGAGAGAACAAAGAGGATCTGGAGAGATTGAGCAACAAGACAGAAATACATGTCAGATG  
GGTAAAATGCGAGCTCAGAATCACTTTGCGGACATTATCTCAGGTCTGATGTCTGAGACA  
GAAGTGTTGATGAGGAAGATTTACACAGTGGATACTATCTCCCAGATCAACAAGAATGATTT  
TGGAACACAGAAATATGAACACTGGATAGTTGCAACTCAGAAGAAATGCAGAGTGTTGCAA  
CTGACAGATAAGGAGAAGGAGAGCAGCATTGTAGGGACCTTTTCATTTGCACCGAACACC  
TGCGGAAATTCAATGATGCTCTCATCATCAGTGAAGATGCCCGCATTGAAGATGCTTTAGC  
CTACCTCACTGAATTTTTACAAATGTCAAAAATGGACCATACACAGAGTTAGAGAAGAAAC  
TGACAGCCAAATTTCAAGAGAAAGAACCAGAACTGACTGCCCTTTCAAAAGACGAATCAAA  
TGAGAATCCCAAGCTGGAAGAGCTTGCTTGCATCCTGGATGAAGCATACCGCTATAACCCA  
CAGACTCGCACTCTTCTCTTTGCTAAGACAAGAGCCTTGGTCGCTGCTTTGAAGAAGTGGG  
TAGAAGTAAACCCTCTACTTAGCCACATAAAGCCAGATGTGTTGATGGGTGCTGGAAGAAG  
AGATCAAAAAACAAGTATGACCCTCCCAATGCAGAAGGGGATACTGGATGCATTCAAAACC  
AACAAAGACAGCAGACTGCTAATTGCTACATCTGTTGCTGACGAAGGCATTGATATTTCTG  
CATGCAACCTTTGTTGTGCTCTATGAATACTTTGGTAACGTCACCAAAATGATCCAAGTCAGA  
GGTCGTGGAAGGGCAAAAGACAGCAAGTGCATCCTTGTGACAAGCAAAATAGAAGTGGTT  
GAGAATGAGAAAAACAACCGTTATAAGGAAGAAATGATGAATGAAGCTATTGAAAAGCTAC  
AGAATTGGGATGAAACAACATTTGCAAGAAAGATTGATGACTTGCAAATGAAGGAAAAGGT  
ATTACGAGATTCCAGGAAGAAAGAAACAAGACCTAAGGTAGTAAAAGGGAAAAAAATCTT  
CTGTGTGGAATGCAAAGCATATGCCTGCAGTACGGATGACATCAGAATTATAAAGGAAT  
CGCATCACACTGTCCTAGGAGATGCGTTCAAGGAGCGCTACATAACAAAGCCGCACCACA  
AAGCAATCCACTTTGATTGTTTTGAGAAAAATGCAAGATGCATTGCCAAAATACTAGTTGC  
CAGCATGACTGGGGAATCACAGTGAAGTACAAGACATTTGATAATCTACCAGTGATCAAAA  
TCAAAAGCTTTGTAGTGGAGGATGTTGAAACTGGGACACAAATGGACTTTCAGAAATGGAA  
AAATATTAATTTTGCTTTGAAGAATTTTGATGAAGAAATGTCCAGCTGA

>lonchura\_striata\_domestica-rig1

ATGACGGCGGAGGAGAAGCAGAACCTGCGGTGCTACAGGCGCTACATCGAGAGGAGCCT  
GAACCCCGTGATACATCCTCAGCAACATGACGGAGTGGCTGTCCGATGAGGTGAAGGAGAG  
GGTCCGGAAGGAGGAGGAGAAGGGAGTGACGGCGGCCGCCGCGCTGTTCTTGATGCC  
GTGCTGCTGCTGGAGGCGGAGGGCTGTTCCGGGGCTTCCAGGACGCTCTGGCTGCAGC  
AGGTTACACTGGACTGGCAGAAGCAATTGAAAAGTGGGACTTTGGCAAAGTGGAAAACTG  
GAGCTGCACAGGCAGCTGTTGAAGCGGATAGAATCAACAATGCTGGAAATTGATCCCGTA  
GCAATCATGCCATACATAAACACATGCCTGATAGAGAGGGAATGTGATGAAATCCTGCAGA  
TCAGTGAATACAGAAGCAAAGCGGCTGGGATAACTAACTCATTGAATGCCTCTGTGCTC  
GGATAAGGAAAAGTGGCCCAAAAGTCTTCAGCTGGCATTGGATAGTGCAGGATATTGCAAT  
GCAAGTGAAGTGTGGAATATAAGAGAAGATAATGGCAAAGATGTTGATGGTGAAATGACAG  
ATGCCTCTGAGAATTACTTTGAAACCATAATGACATTTTCTGAAGAAGCAGAATGTGATAAT  
CTGAGCAAAAATCTCTCTTCAGTTTCAGAAAGCATCTGTGAGTTTTCATCTGTTTATGAACC  
AAAGAAGGCTCGGAGCTACCAGATTGAGCTTGCACAGCCTGCTATTGATGGGAAAAACAC  
ATTGATTTGTGCCCCACAGGATCTGGAAAACTTTTGTGGCAGTTCTGATTTGTGAACATC  
ATTTGCAAAACATTCCCTCAGGACAAAAGGCAAAAGTTGTCTTCCTTGCAACCAAAATGCCA  
GTGTATGAGCAACAGAAAAATGTATTCAGGCAGCATTTTGAAGAAGTGGATACTTTGTTCA  
AGGAATTTGTGGTGAAACAGTTGCAAATATCTCTGTAGAAAATGTTATACAGGACAGTGACA  
TCATTGTGCTAACGCCCCAGATTCTTGTGAATATCATGAAAAAGGGATCCTTAGCTCCCTT

TCCATCTTCACTCTCATGATATTTGATGAGTGCCACAACACTACAGGCAACCACCCTTATAA  
TGTGTTGATGACCAGATACCTGGATCAAAAATTTGACTCCTCTGCAAAACAGCTGCCTCAG  
ATTGTAGGTTTAACTGCTTCTGTCCGAGTTGGTAATGCCAAGAGCACTAATGAAACTGTAG  
AGCACATCTGTACCCTCTGCTCCTACCTTGACATACAGGCCATATCCACTGTCAGAGAGAA  
CAAACAAGACCTGCAGAGGTTTGGTAACAAGCCAGAAACGCATATCAGATGGGTAAAATG  
AGAGCTCAGAATCGTTTTGCAGACATTATCTCAGGTCTGATGTCTGAGACAGAGGTTTTGA  
TGAAGAAGATTTACCCAGTGGATACCATCTCCCAGATCAACAAGATTTACTTTGGAACACAG  
AGATATGAACATTGGATAGTTTCCACTCAGAAGAAATGCAGACTATTGCAACTGGAAGATAA  
GGAGAAGGAGAGCAGTATTTGTAGAGACCTTTTCATTTGTAAGTGAACACTTGCAGGAAATTC  
AACGATGCTCTCATTATCAGTGAAGATGCCCCGCATCGAAGATGCTTTAGCCTATCTAAATGA  
ATTTTTCACAAATGTAAAAAACGGACCATATACAGAGTTAGAGAAGCAGCTGACAGAGAAAT  
TTCAAGAGATAGAACTAGAGCTGACTGCCCTTTCAAAGATGAGTCAAATGAGAATCCAAA  
GTTGGAAGAGCTTGCTTGCATCCTGGATGAAGCATACCACTATAACCCACAGACTCGCACT  
ATTCTCTTTGCCAAGACAAGAGCCTTAGTAGCTGCTTTGAAGAAGTGGATAGAAACAAACC  
CTCTTCTTAGCCACATAAAGCCAGATGTGTTGATGGGTAAGGGAAGAAAAGATCAAAAAAC  
AGGTATGACCCTGCCAATGCAGAAGGGTGTCTGGATGCATTCAGAAATGACAAAGACATC  
AGACTGCTAATTGCTACATCTGTTGCTGATGAAGGCATTGATATTACTGAGTGCAACCTTGT  
GGTGCTCTATGAATACTTCGGTAATGTCACCAAAATGATCCAAGTCAGAGGTCGTGGAAGG  
GCAAAAGACAGCAAGTGCATCCTTGTGACAAGCAAAATGGAAGTGGTTGAGAATGAAAAAC  
TAAACAGTTACAAGGAAGAAATGATGACTGCAGCTATTGAAAAGCTACAGAAGTGGGATGA  
AACATCATTTGCAAGAAAGATACGTGGCCTCCAAATGAAGGAAAAAATGCTAAGAGATTCC  
AGGAAGAATGAAACAAAACATGAAATAGTAGGAGGGAAAAAATCTTTCTGTGGAAAAT  
GCAAAGCATATGCCTGCAGTACTGATGACATCAGAATTATAAAGGGATCTCATCACATTGTC  
TTAGGTAACGCGTTCCAGGAGCGTTATACAACAAAGCCCCACAGGAAACCAGTTTCAGTTTG  
ATGATTTTGTAAAAAAGCAAGATGCACTGCCGAAATACCGAGTGCCAGCATGACTGGGG  
GATCATAGTGAAATACAAGACATTTGATAATCTACCCGTGATCAAATCAGAAGCTTTGTAC  
TAGAGGACGTTGAAAGTGGGACACAAATGGATTTTCAGAAATGGAGAAGTATTAATTTGTCT  
TTGAAGAATTTTGATGAAGAAACATCCAGCTGA

>lorius\_garrulus-rig1

ATGACGGCGGAGGAGAAGAGGAACCTGCAATGCTACAGGCGGTACATCGAGAAGAGCCT  
GAACCCCGTCTACATCCTGGGCAACATGACGGCATGGCTGTCCGACGAGGAGAAGGAGC  
GGGTCCGTAAGGAGGCGGAGAAGGGTGCGACGGCGGCCGCCGCGCTGTTCTGGATAC  
CATCCTGCTGCTGGAGGCGGAGGGCTGGCTCCGGGGCTTCCTGGATGCCCTGGTTGCAG  
CAGGTTACACTGGGCTGGCAGAAGCAATTGAAAATTGGGACTTCAGCAAGCTGGAAAACT  
AGAGTTGCACAGACAGCTGTTGAAGCGGATAGAAGCAACCATGCTAGAAGTTGATCCGGT  
AGCACTCATGCCTTACATAAACACGTGCCTGATAGAAAGGGAGTGTGACGAGATCCTGCA  
GATTAGCGAATACAGAAGCAAAGCGGCTGGGATGACTGAACTCATTGAACGTCTCTGTGCA  
TCAGATAAGGAAAACTGGCCAAAAAGCCTTCAGCTGGCACTGGATAACACAGGATATTACA  
ATGCAAGTGAAGTGTGGGATATGAGAGAAGATAGTGGCAAAGACATTGATGGTGAAATGAC  
AGATGCCTTTAAGAACAGCTTTGAAACCACAATGACGTTTTCTGAAGAGGCAGAATGTGAT  
AATAATCTCAGTGAAAATCTCTGTTTAGGTTTCAGAAGAGATCTGTGAGTCTTCACCTGTTTA  
TGAACCAAAGAAGGCTCGCAGCTACCAGACTGAACTTGACAGCCTGCTATGAATGGGTA  
CAACACATTGATATGTGCCCCACAGGATCTGAAAAACTTTTGTGGCACTGATGATTTGT  
GAACACCATTTCCAAAACATGCCCTCAGGACGAAAGGCCAAAAGTTGTCTTTCTTGCAACCA



AACTGCCAGTGTATGAACAACAGAAAAATGTATTCAAACAGCACTTCGAAAAGAAGTGGATAT  
TCTGTTCAAGGAATTAGTGGTGAAACAGTTGCAAATGTCTCTGTAGAAAAGGTTATACAGGA  
CAGTGACATCATTGTGCTGACACCCCAGATTCTTGTGAATAGCATCGAGGAAGGGATCCTT  
AGCTCCCTCTCCATCTTCACACTGATGATATTTGATGAGTGTGACAACACTATGGGCAACCA  
CCCTTACAATGTGTTAATGACCAGATACCTGGAACAAAAATTTGACTCCTCTGCAAGCCAAC  
TACCTCAGATTGTAGGTTTAACTGCTTCTGTTGGAGTTGGTAATGCCAAGACCATCACGGA  
ACAATAGAGTATGTCTGTACCGTCTGCGCCAACCTTGACGTACAGGCCATATCTACTGTC  
AGAGAGAACAAACAGGATCTGCAGAGATTTGGAACAGGCCAGAAATACATGTCAGATGG  
GTGAAAATGAGAGCTCAAAATAACTTTGCAGAGATTATCTCAGGCCTGATGTCTGAGACAG  
AGGCGTTGATGAGAAAGAATTACTCAGTGGATACTATCTCCAGATCGACAAGAATGATTTT  
GGAACACAGAAATATGAACAGTGGATAGTTATCACTCAGAAGAAATGCAGACTACTGCAAC  
TAGCAGATAAGGAGAAGGAGAGCAGCATTTGTAGAGACCTTTTCATTTGCACCGAACACCT  
GCGGAAATTCAATGATGCTCTCATCATCAGTGAAGATGCCCGCATTGAAGATGCTTTAGCC  
TACCTAACTGATTTTTTTCAGAAATGTCAGAAATGGACCGTATACAGAGTTAGAGAAGCATCT  
TACAGCCAAATTTCAAGAGAAAGAACCAAACTCTCTGCCCTTTCAAAGATGAGTCGAATG  
AGAATCCCAAACCTGGAAGAGCTTGCTTGCATCTTGGATGAAGCATACCACTATAACCCACA  
GACTCGCACTATTCTCTTTGCTAAGACAAGAGCCTTAGTAGCTGCTTTGAAGAAGTGGATA  
GAAGCAAACCCTCTATTTAGCCACATAAAGCCAGGTATATTGATGGGTCATGGAAGAAGAG  
ATCAAAAAACAGGTATGACCCTCCCAATGCAGAAGGGTGTACTGGATGCATTCAAAACCAA  
CAAAGACACCAGACTGCTAATTGCTACTTCTGTTGCTGATGAAGGCATTGATATTTCTGAGT  
GTAACCTTGTTGTGCTCTATGAGTACTTTGGTAATGTCACCAAAATGATCCAAGTCAGAGGT  
CGTGGAAGGGCTAAAGACAGCAAGTGCATCCTCCTGACAAACAAAACAGAAAGTGGTTGAG  
AAAGAGAAACACAACCGTTACAAGGAAGAAATGATGAATGAAGCTGTTGAAAAGCTACAGA  
ATTGGGATGAAAGAACATTTGCAAGCAAGATACATGGTTTGCAAATGAAGGAAAAGGTATC  
ACGGGATTCCAGGAAGAAGGAAACACGATACAAGGTAGATGAAGGAAAGAAAAATCTTCTG  
TGTGGAAAATGCAAAGCATTTGCCTGCAGTACAGATGACATCAGGATTATAAAGGAATCTC  
ATCACACTGTCCTAGGAGACGCATTCAAGGAGCGGTATATAACAAAGCCTCACCATAAACC  
AGTCCAGTTTGATTGTTTTGTGAAAAAAGCAAGATGCATTGCCAAAATACTAACTGCCAGC  
ATGACTGGGGAATCATAGTGAAGTACAGGACATTTGATAATCTACCAGTGATCAAATCAA  
AGCTTTGTAGTAGAAAACATTGAACTGGGACACAAATGGATTTTCAGAAATGGAGAGATAT  
TAATTTTTCTCTGAAGAATTTTGATGCTGAAGAGCTGTCCAGCTGA

>malurus\_cyaneus\_samueli-rig1

ATGACGGCGGAGGAGAAGCGGAACCTGCAGTGCTACAGGCGGTACATCGAGAGGAGCCT  
GAACCCCGTGATACATCCTGAGCAACATGACGGACTGGCTGTCCGACGAAATCAAGGAGAG  
AGTCCGAAAGGAGGAGGAGAAGGGGGTGACCGCGGCCGCGCGCTGTTCTTGATGCC  
GTTCTGCTGCTGGAGGCGGAGggCTGGCTCCGGggCTTCCTGgATgCCCTGGTCGCAGCAG  
GTTACACTGGACTGGCAGAAGCAATCGAAACCTGGGACTTCAGCAAACCTGGAAAACTGG  
AACTGCATAGGCAGCTGTTGAAACGGATAGAAGCAACAATGATAGAAATTGATCCAATAGC  
GCTCATGCCATATATAAACACATGCCTGATAGAAAGGGAGTGTGATGAGATCCTGCAGATC  
AGTGAATACAGAAGCAAAGCAGCTGGGATAACTAACTCATTGAATGCCTCTGTGCTCGG  
ATAAGGAAAATTGGCCCAAAAGTCTTCAGCTGGCACTGGATAACGCAGGATATTACAATGC  
AAGTGAACCTCTGGAATATAGGAAAAGATAATGGCAAAGATCTTGATGGTGAATGACAGAT  
GCCTCTGAGAACTACTTTGAAACCATGGTGACATTTTCTGAAGAGGCAGAATGTGATAATCT  
CAGTGAAAATCTCTCTTCAGTTTCAGTAAAGGTCTGTGAGTCTTCATCTGTTTATGAACCAA

AGAAGGCTCGGAGCTACCAGATTGAGCTGGCACAGCCTGCTATTGATGGGAAAAACACAC  
TGATTTGTGCTCCACAGGATCTGGAAAAACCTTTGTGTCACTTCTTATTTGTGAACATCAT  
TTACAAAACATTCCGCCGGGACAGAAGGCCAAAAGTTGCCCTTCCTTGCAACCAAAGTGCCAG  
TGTATGAACAACAGAAAAATGTATTCAGGCAGCATTTTGAAAGAAGTGGATATTCTGTTCAA  
GGAATTTGTGGTGAACAGTTGCAAGTATTGCTGTAGAAAATGTTATACAGGACAGTGACA  
TCATTGTGCTAACACCCCAGATTCTTGTGAATAGCTTGGAGAAAGGGATCCTTAGCTCCCT  
CTCCATCTTCACACTGATGATATTTGATGAGTGCCACAACACAACAGGCAACCAACCCTTAC  
AATGTATTGATGACCAGATACCTGGATCAAAAATTTGACTCCTCTGCACACCAGCTGCCTCA  
GATTGTAGGTTTAACTGCTTCTGTTGGAGTTGGTAATGCCAAGACCACCCATGAACTGTA  
GAGCACATCTGTACCCTCTGCTCCTACCTTGATGTGCAGGCCATATCCACTGTCAGAGAGA  
ACAAACAAGATCTGCAGAGATTGAGCAACAAGCCTGAAACACATGTCAGATGGGTAAAAT  
GCGAGCTCAGAATCACTTTGCAGACATTATCTCAGATCTGATGTCTGAGACAGAGGTGTTG  
ATGAGGAAGATTTACTCAGTGGATACCATCTCCCAAATCAACAAGACTGATTTTGAACACA  
GAAATATGAACACTGGATAGTCTACACTCAAAGAAATGCAGACTGTTGCAACTAGAAGATA  
AGGAGAAGGAGAGCAGCATTGTAGAGACCTTTTCATTTGACTGAACACTTGCGGAAATT  
CAACGATGCTCTCATTATCAGTGAAGACGCCCGCATCGAAGATGCTTTAGCCTACCTAAAT  
GAATTTTTACAAATGTGAAAAATGGACCATATACAGAATTAGAGAAGCAACTGACGGACAA  
ATTTCAAGAGAAAGAACCAGAGCTGACTGCCCTTTCAAAGATGAGTCAAATGAGAATCCA  
AAGCTGGAGGAGCTTGCTTGCATCCTGGATGAAGCCTACCGCTATAACCCACAGACTCGC  
ACTATTCTCTTTGCCAAGACAAGAGCCTTAGTAGCTGCTTTAAAGAAGTGGATAGATGCAAA  
CCCTCTACTTAGCCACATAAAGCCAGATATGTTGATGGGTAAAGGAAGAAGAGATCATAAA  
ACAGGTATGACCCTGCCAATGCAGAAGGGTATACTGGATGCATTGAGAAAGGACAAAGAC  
ATCAGACTGCTAATTGCCACATCTGTGGCTGATGAAGGCATTGATATTACTGAGTGCAACC  
TTGTGGTGTCTATGAATACTTTGGTAATGTCACCAAATGATCCAAGTCAGAGGTGCTGG  
AAGGGCAAGAGACAGCAAGTGCATCATTGTGACAAGCAAAGTGAAGTGGTTGAGAATGA  
AAAACAAAATAATTACAAGGAAGAAATGATGAATGCAGCTATTGAAAAGCTACAGAACTGG  
GATGAAACAACATTTGCCAGAAAGATACATGACCTGCAAATGAAGGAAAAGATACTACGAG  
ATTGCAGGAAGAAAGAAACAAAACCTAAAGCAGTGGAAGGGAAAAAAATCTTCTGTGTGG  
GAAATGCAAAGCATATGTTTGTGTACAGATGACATCAGAATTATAAAGGAATCTCATCACA  
CTGTCCTAGGTGATGCGTTCAAGGAGCGTTATATAACAAAGCCCCACAGGAAACCAATCCA  
GTTTGATGGTTTTGAGAAAAAAGCAAGATGCACTGTCGAAATACTGACTGCCAGCATGAC  
TGGGGGATCACAGTGAAGTACAAGACATTTGACAATCTACCAGTGATCAAAATCAAAGCT  
TTGTGCTAGAGAACATTGAACTGGGACACAAATGGATATTCAAAAATGGAAAGATATTAAT  
TTGTCTTTGAAGAATTTTGAGGAACTTCCAGCTGA

>manacus\_vitellinus-rig1

ATGACGGCGGAGGAGAAGAGAAACCTGCGCTGCTACAGGCGGTACATCGAGAGGATCCT  
GAACCCCGTCTACATCCTGAGCAACATGACGGACTGGATGTCGGACGAGATGAAGGAGAG  
AGTGCGAAAGGAGGAGGAGAAGGGGGTGACGGCGGCCGCCGCGCTGTTCTTGATACC  
GTGCTGCTGCTGGAGGCGGAAGGCTGGCTCCGGGGCTTTCTGGACGCCCTTGTTGCAGC  
AGGTTACACTGGACTGGCAGAAGCAATAGAAAAGTGGGACTTCAGCAAACTGGAAAACTG  
GAACTGTACAGACAGCTGTTGAAGCGGATAGAAGCAACAATGCTAGAAATTGACCCAGTAG  
CACTCATGCCTTACATAAACACATGCCTGATAGAGAGGGAGTGTGATGAGATCCTGCAGAT  
TTGTGAATACAGAAGCAAAGCAGCGGGGATAACTAACTCATTGAATGTCTGTGCTCG  
GATAAGGAAAACTGGCCGAAAAGTCTTCAGTTGGCATTGGATATGGCAGGGTATTACAATG

CAAGTGAAGTGTGGAATTTAAGAGAAGATAATGGCAAAGATGCTGATGGTGAATGACAGG  
TGCCTCTGACAATTGCTTTGAAACCACGATAACATTTGCTGAAGAAGCAGAGTGTGATAATA  
ATCTCAGTGAAAATCTTTCTTCGGGTTTCAGGAATGGTCCATCAGTCTTCATCTGTTTATGAA  
CCAAAGAAGGCTCGAACCTACCAGATTGAACTTGCACAGCCTGCTATCAATGGGAAAAACA  
CATTGATATGTGCCCTACAGGATCTGGAAAACTTTTGTGGCGCTTCTGATTTGTGAACAC  
CATTTGCAAAACATGCCCTCTGGAAAAAGCCAAAAGTTGTCTTTCTTGCAACCAAAGTGCC  
AGTGTATGAACAACAGAAAAATGTATTTCAGACAGCATTTTGAAGAAGTGGATATTCTGTTC  
AAGGAATATGTGGTGAACAGTTGCAAATGTGTTCGGTAGAACACGTTATACAGGACAGTGA  
CATCATTGTGCTCACGCCCCAGATTCTTGTGAATACCATCGAGACTGGGATCCTTAGCTCT  
CTCTCCATCTTCACTCTGATGATATTTGATGAGTGTCAACACCCACAGGCAACCACCCTTA  
CAATGTGTAAATGACCAGATACCTGGAACAAAAATTTAACTCCTCTGCAACCAAAGTGCCCTC  
AGATTGTAGGTTTAACTGCTTCTGTTGGAGTTGGTAATGCCAAGAACATCAAGGAACTATA  
GAGCACATATGTACCCTCTGCTCCTACCTTGACATACAGGCCATATCCACTGTCAGAGAGA  
ACAAAGAGGATCTGCAGAGATTGAGAAACAAGCCAGAATCATATGTCAGATGGGTAAAAT  
GCGAGCTCAGAATCACTTTGCAGACATTATCTCAGGTCTGATGTCTGAAACAGAGGCGATG  
ATGAGGAAGATTTACTCATCAGATACTATCTCCCAAATCAACAAGAATGATTTTGAACACA  
GAAATATGAACAGTGGATAGTTCTCACTCAGAAGAAATGCAGACTGTTGCAGCTGGCAGAT  
AAGGAGAAGGAGAGCAACATTTGTAGAGACCTTTTCATTTGTACCGAACACTTGCGGAAAT  
TCAACGATGCTCTCATTATCAGTGAAGACGCACGCATCGAAGATGCTTTAGCCTACCTAAA  
TGAATTTTTCACAAATGTGAAAAATGGACCATATACAGAGTTAGAGAAGCAACTGACGGACA  
AATTTCAAGAGAAAGAACCAGAACTGACTGCCCTTTCAAAGATGAATCAAATGAGAATCCC  
AAGCTGGAAGAGCTTGCTTCCATCCTGGACGAAGCATACCGCTATAACCCACAACTCGCA  
CTATTCTCTTTGCCAAGACAAGAGCCTTAGTAGCTGCTTTGAAGAAGTGGATAGAAGCAAA  
CCCTCTACTTAGCCACATAAAGCCAGATGCGTTGATGGGTTCAGGGAAGAAAAGAACATAAA  
ACAGGTATGACCCTGCCAATGCAGAAGGGTGTGCTGGATGCCTTCAAACCGACAAAGAC  
AGCAGACTGCTAATTGCTACATCCGTTGCTGATGAAGGCATTGATATTTCTGAGTGCAACC  
TTGTTGTGCTCTATGAATACTTCGGTAATGTCACCAAATGATCCAAGTCAGAGGTCGTGG  
AAGGGCGAAAGACAGCAAGTGCGTCCTTGTGACAAGCAAAGTGGAAAGTGGTTGAGAATGA  
AAACAGAACCGTTATAAGGAAGAAATGATGAATGCAGCTATTGAAAACCTGCAGAACTGG  
GATGAAACAACATTTGCAAGAAAGATACGTGACCTGCAAGTGAAGGAAAAGGTATTACGAG  
ATTGCAGGAAGAAAGAACTATAAAACATGAAGTAGTGGAAGGGAAAAAAATCTTCTGTG  
TGGAATATGCAAGCCTATGCCTGCTGTACAGATGACATCAGAATTATAAAGGACTCTCAT  
CACACTGTCCTAGGAGATGCATTCAAGGAGCGTTATATAATGAAGCCTCACCAGAAACCAC  
GTCCATTTGATGTTTTTGAAGAAAAAGCAAGATGCATTGCCAAAAAACTAATTGCCAGCAT  
GACTGGGGGATCACAGTGAAGTACAAGACATTTGATAATCTACCAATCATCAAAATCAGAA  
GCTTTGTAGTAGAGGACATTGAAACTGGGACACAGATGGATTTTCAGAAATGGAAAAATATT  
AATTCTTCTTTGAAGAATTTTGTATGAAGAAACATCCAGCTGA

>melanerpes\_aurifrons-rig1

ATGACCGCGGAGCAGAAGAAGAGCCTGCAGTGCTACAGGCGGTACATCGAGAAGAGCCT  
GAATCCCGTCTACATCCTGAGCAACATGACGGACTGGCTGTCGGATGAGGTGAAGGAGAG  
AGTCCGGAAAGAGGAGGAGAAGGGGGTGACAGCGGCTGCTGCGATGTTCTGGATGTCA  
TCTTGAGCTGGAGGAGGAGATGGCTCCGGGGCTTCATAGACGCCCTCGTCGCAGCA  
GGTTACACTGGGCTGGCAGAAGCCATTGAAAACCTGGGACTTCAGCAAGCTGGAAAACTG  
GAGCTGCACAGGGAGCTGCTGAAGAGGATAGAAGCCACAATGCTAGAAGTCGACCCGGT

GATGGTCATGCCTTACATAAACACGTGCTTGATAGAAAGGGAGTGTGATGAGATCCTGCAG  
ATCAGTGAATACAGGAGCAAAGCCGCCGGGATAACGAAGCTCATTGAGTGCCTCTGTCGC  
TCGGACAAAGAAAACCTGGCCCAAGAGCCTTCAGGTGGCCCTGGACAGTGCAGGGTATTAC  
AATGCCAGTGAGCTGTGGGATATGAGAGAAGAGAACTTCAAGGATTTTGATGGTGAAGTG  
GCAGATGCCTCTGAGAACAGCTTTGAAGCCATGGTGACGTTTTCTGAAGAGGTAGAATGTG  
ACAATTTCAGTGAAAACCTCTCTTCAGCTTCAGGAGGGACCTATGAGCCTCCAGCTGTGTA  
TGAGACAGAGCAAGCTCGGAGCTACCAGATTGAACTTGCACAGCCTGCAATCAACGGGAA  
AAATACCCTGATATGTGCTCCACAGGATCTGGAAAACTTTTGTGGCCCTTCTGATCTGT  
GAACACCACCTGCAAAACGTGCCCCCGGGACGGAAGGCGAAGGTTGTCTTCCTGGCAAC  
CAAAGTGCCAGTGTATGAGCAGCAGAAAGATGTCTTCAGGCAGCATTTTGAAAGGCAGGG  
GTACTCTGTTGAGGGATCTGTGGTGAGACAGTTGCCAACATCCCCGTAGAAAACGTGATT  
GAGGACAGCGACATCATCGTGCTGACGCCCCAGATTCTGGTCAACTGCTTCAAGCAAGGC  
ATCCTCACCTCCCTCTCTGTCTTCACCCTGATGATATTTGATGAGTGCCACAACACCACGG  
GCAACCACCCTTACAATGTGTTAATGACCAGATACCTGGAGCAAAAATTTGACTCCTCTGC  
AAGCCAGCTGCCCCAGATTGTAGGTTTAACTGCTTCTGTTGGAGTTGGTAATGCCAAGAGC  
ATCGAGGAAACCATAGAGCACATCTGTACCCTCTGCTGCTGCCTTGACATACAGACCATAT  
CCACTGTCAGAGAGAACAAGAGGATCTGCAGAGGTTTGGAAACAAGCCAGAAACACATG  
TCAGGTGGGTAAAAGGCGAGCTCAGAATCGCTTTGCAGACATCATCTCGGGTCTGATGTC  
TGAGGCAGAGGCGCTGATGAGGAGGACTTACTCAGTGGACACTATCTCCCAAATCAGCAA  
GAATGATTTTGAACACAGAGGTATGAGCAGTGGATAGTCACCACGCAGAAGAAATGCAG  
GCTGCTGCAGCTGCCAGACAAGGAGAAGGAGAGCAGTGTCTGTAGAGACCTCTTCATCTG  
CACTGAACACCTGCGTAAGTTCAACGACGCCCTCATGATCGGTGAAGACGCTCGCATTGA  
GGATGCTCTGGCCTACCTGACTGAGTTCTTCGCCAACGTCAGGAATGGACCCTACACACA  
GCTGGAGAGGAGACTCACAGCCAGGTTTCAAGAGAAAGAGGCAGAGCTGACTGCCCTCTC  
AAAAGATGAATCCAGTGAGAACCCCAAGCTGGAGGAGCTTGCCTGCATCCTGGATGAAGC  
ATACCGCTACAACCTCAGACACTCGCACTCTTCTCTTTGCCAAGACAAGAGCCTTAGTAGCT  
GCTTTGAAGAAGTGGATAGAGGCAAACCCTCTGCTGAGCCATGTAAAGCCAGGTGTGTTG  
ATGGGTCATGGAAGAAGAGACCAAAAAACAGGCATGACCCTCCCAATGCAGAAGGTGATA  
CTGGAGGCATTAGAACCAACAAGGACTGCAGGCTGCTGATTGCTACATCTGTTGCTGATG  
AAGGCATTGACATTTCTGAGTGCAACCTCGTTGTGCTCTATGAGTACTTTGGCAATGTCAC  
CAAAATGATCCAAGTCAGAGGTCGTGGAAGGGCAAGGGACAGCAAGTGCATCCTTGTGAC  
AAGCAAAACAGAAGTGGTTGAGAATGAGAAACACAACCATTACAAGGAAGAAATGATGAAT  
GAAGCTGTTGAGCAGCTGCAGAACTGGGACGAAGCAGCATTTGCAAGGAAGATACATGAC  
CTGCAAAATGAAGGAGAAGGTGTTAAGAGAATTAAGAAGAAAGAAACAAGACCTCAGCTAG  
TGGAAGGGAAAAAAATCTCCTGTGTGGAAGGTGCAAAGCTTATGCCTGCAGTACAGATGA  
CATCAGAGTTATAAAGGTATCTCATCACACTGTCCTGGGAGATGAGTTCAGGGAGCGTTAT  
GTAACAAAGCCCCACCACAAACCAATGAAGTTTGACTGCTTTGAGAAGAAAAGCAAGATGC  
ACTGCAAAAACACCAACTGCCACCACGACTGGGGCATCACAGTGAAGTACAAGATGTATGA  
CAACCTGCCTGTGATCAAAATCAAAAGCTTTGTCGTGGAGAACGTTGAGACTGGGAGACAG  
ATGGACTTCCAGAAGTGGAAGAACATCAATTTTTCTCTGAAGAACTTTGATGATGAAGAAAT  
GTCCATCTGA

>melopsittacus\_undulatus-rig1

ATGACGGCGGAGGAGAAGAGGAACCTGCAATGCTACAGGCGGTACATCGAGAAGAGCCT  
GAATCCCGTCTACATCCTAGGCAACATGACGGCCTGGCTGTCGGACGAGGAGAAGGAGC

GGGTCCGTAAGGAGGAGGAGAAGGGGGTGACGGCGGCCGCCGCGCTGTTTCTGGATAC  
CATTCTGCTGCTGGAGGCGGAGGGCTGGCTCCGGGGCTTCCTGGATGCCCTGGTCGCAG  
CAGGTTACACTGGGCTGGCAGAAGCAATTGAAAATTGGGACTTCAGCAAGCTGGAAAACT  
GGAGTTGCACAGACAGCTGTTGAAGCGGATAGAAGCAACCATGCTAGAAGTTGATCCAGT  
AGCACTCATGCCTTACATAAACACGTGCCTGATAGAAAGGGAGCGTGATGAGATCCTGCA  
GATTAGCGAATACAGAAGCAAAGCAGCTGGGATAACTAACTCATTGAATGTCTCTGTCGA  
TCAGACAAGGAAAACTGGCCAAAAAGCCTTCAGCTGGCACTGGATAACACAGGATATTACA  
ATGCAAGTGAAGTGTGGGATATGAGAGAAGATAATGGCAAAGGCATTGATGGTGAATGAC  
AGATGCCTTTAAGAACAGCTTTGAAACCACAATGATATTTTCTGAAGAGGCAGAATGTGATA  
ATAATCTCAGTGAAAATCTCTGTTTAGGTTGAGAAGAGATCTGTCAGTCTTCACCTGTTTAT  
GAACCAAAGAAGGCTCGGAGCTACCAGACTGAACTTGCACAGCCTGCTATGAATGGGTAC  
AACACATTGGTATGTGCACCCACAGGATCTGGAAAACTTTTGTGGCAGTGATGATTTGTG  
AACAACATTTCCAAAACATGCCCTCAGGACGAAAGGCCAAAAGTTGTCTTTCTTGCAACCAA  
CTGCCAGTGTATGAACAACAAAAAATGTATTCAAGCAGCACTTTGAAAGAAGTGGATATTC  
TGTTCAAGGAATTAGTGGTGAAACAGTTGCAAATGTTTCTGTAGAAAAGGTTATACAGGACA  
GCGACATCATTGTGCTGACACCCAGATTCTTGTGAATAGCATCGAGGAAGGGATCCTTAG  
CTCCCTCTCCATCTTCACACTGATGATATTTGATGAGTGCCACAACACTATGGGCAACCAC  
CCGTACAATGTGTTAATGACCAGATACCTGGAACAAAAATTTGACTCCTCTGCAAGCCAACT  
ACCTCAGATTGTAGGTTTAACTGCTTCTGTTGGAGTTGGTAATGCCAAGACCATCAAGGAA  
ACAATAGAGTATGTCTGTACCGTCTGCGCCAACCTTGACGTACAGGTCATATCTACTGTCA  
GAGAGAACAACAGGATCTGAAGAGATTTGAAACAGGCCAGAAATACATGTCAGATGGG  
TGAAAATGAGAGCTCAAATCACTTTGCAGAGATTATCTCAGGCCTGATGTCTGAGACAGA  
GGCGCTGATGAGAAAGAATTACTCAGTGGATACTATCTCCAGATCAACAAAAATGATTTTG  
GAACACAGAGATATGAACAGTGGATAGTTACCACTCAGAAAAAATGCAGACTACTGCAACT  
AGCAGATAAGGAGAAGGAGAGCAACATTTGTAGAGACCTTTTCATTTGCACTGAACACCTG  
CGGAAATTCAATGATGCTCTCATCATCAGTGAAGATGCCCGCGTTGAAGACGCTTTAGCCT  
ACCTAACTGACTTTTTTCAGAAATGTCAGAAATGGACCATATACAGAGTTGGAGAAGCAGCTT  
ACAGCCAAATTTCAAGAGAAAGAGCCAAAACCTTTGCCCTTTCAAAAGATGAATCGAATGA  
GAATCCCAAACCTGGAAGAGCTTGCTTGCATCTTGGATGAAGCATACCACTATAACCCACAG  
ACTCGCACTATTCTCTTTGCTAAGACAAGAGCCTTAGTAGCTGCTTTGAAGAAGTGGATAG  
AAGCAAACCCTCTATTTAGCCACATAAAGCCAGGTATATTGATGGGTCATGGAAGAAGAGA  
TCAAAAAACAGGTATGACCCTCCCAATGCAGAAGGGTGTACTGGATGCATTCAAACCAAC  
AAAGACACCAGACTGCTAATTGCTACTTCTGTTGCTGATGAAGGCATTGATATTTCTGAGTG  
TAACCTTGTTGTGCTCTATGAATACTTTGGTAATGTCACCAAAATGATCCAAGTCAGAGGTC  
GTGGAAGGGCTAAAGACAGCAAGTGCATCCTCCTGACAAACAAAACAGAAGTGTTGAGA  
AAGAGAAACACAACCGTTACAAGGAAGAAATGATGAATGAAGCTGTTGAAAAGCTACAGAA  
TTGGGATAAAAGAACATTTGCAAGAAAGATACATGGTTTGCAAATGAGGGAAAAGGTATTA  
CGGGATTCCAGGAAGAAGGAAACACGATACAAGGTAGATGAAGGAAAGAAAAATCTTCTGT  
GTGGAATGCAAAGCATTTGCCTGCAGTACAGATGACATCAGAATTATAAAGGAATCTCAT  
CACACTGTCTAGGAGACGCATTCAAGGAGCGGTATATAACAAAGCCTCACCATAAACCAG  
TCCAGTTTGATTGTTTTGAGAAAAAAGCAAGATGCATTGCCGAAATACTAACTGCCAGCAT  
GACTGGGGAATCATAGTGAAGTACAGGACATTTGATAATCTACCAGTGATCAAATCAAAA  
GCTTTGTAGTAGAGAACATTGAAACTGGGACACAAATGGATTTTCAGAAATGGAGAGATATT  
AATTTTCTCTGAAGAATTTTGATGCTGAAGAGCTGTCCAGCTGA

>melospiza\_melodia-rig1

ATGACGGCGGAGGAGAAGGCGAACCTGCGGTGCTACAGGCGCTACATCGAGAGGAGCCT  
GAACCCCGTGTACATCCTCAGCAACATGACGGAATGGCTGTCCGACGAGGTGAAGGAGAG  
AGTCCGCAAGGAGGAGGAGGAGAAGGGCGTGACGGCGGCCGCCGCGCTGTTCTTGAT  
GCTGTGCTGCTGCTGGAGGCGGAGGGCTGGCTCCGGGGCTTTCTGGACGCCCTGGTTGC  
AGCAGGTTACACTGGGCTGGCAGAAGCAATTGAAAACCTGGGACTTCAGCAAACCTGGAAAA  
ACTGGAGCAGCACAGGCAGCTGTTGAAGCGGATAGAAGCAACAATGCTAGAAATTAATCC  
AGTAGCAATCATGCCATACATAAACACATGCCTGATAGAGAGGGAGTGTGATGAGATCATT  
CAGATCAGTGAAAACAGAAGCAAGGCAGCCGGGATAACAAAACCTCATTGAATGCCTCTGTC  
GCTCGGATAAGGAAAACCTGGCCCAAAAGTCTTCAGATGGCATTGGATTGTGCCGAATATTA  
CAATGCAAGTGAACCTGTGGAATATAAGAGAAGATAATGGCAAAGACATTGATGGTGAAATG  
ACAGATGCCTCTGAGAATTACTTTGAAACCATGATGACATTTTCTGAAGAAGCAGAATGTGA  
TAATCTGAGCAAAAATCTCTCTTCAGTTTCAGAAAGCATCTGTGAGTCTTCATCTGTTTATGA  
ACCAAAGAAGGCTCGGAGCTACCAGATTGAGCTTGCACAGCCTGCTTTTGGTGGGAAAAA  
CACATTGATTTGTGCCCCCACAGGATCTGGAAAAACCTTTGTGGCACTTATGATTTGTGAAC  
ATCACTTGCAAACGTTCCCTCAGGACGAAAGGCAAAAGTTGCCTTCCTTGCAACCAAAGT  
GCCAGTGTATGAGCAACAGAAAAATGTATTCAGGCAGCATTTTGAAGAAGTGGATACTCT  
GTTCAAGGAATTTGTGGTGAAACAGTTGCAAATATCTCTATAGAAAATGTTATACAGGACAG  
TGACATCATTGTGTTAACGCCCCAGATTCTTGTGAATAGCATGGAGAAAGGGATTCTTAGC  
TCCCTCTCTGTCTTCACTCTGATGATATTTGATGAGTGCCACAACACTACAGGCAACCACT  
CTTACAGTGTGTTGATGACCAGATACCTGGATCAAAAATTTGACTCCTCTGCAAACCACTA  
CCTCAGATTGTAGGTTTAACTGCTTCTGTTGGAGTTGGTAATGCCAAGAGCACTAATGAAA  
CTATAGAGCACATCTGTACCCTCTGCTCCTACCTTGACATACAGGCCATATCCACTGTCAG  
AAAGAACAAAGAAGATCTGCAGAAGTTTCAAACAAACCAGAAACACATATCAGATGGGTT  
AAAATGCGAGCTCAGAATCACTTTGCAGACATTATCTCAGGTCTGATGTCTGAGACAGAAG  
TGTTGATGAGGAAGATTTACTCAGTGGATTCCATCTCCCAAATCAACAAGAATTACTTTGGA  
ACACAGAGATATGAACAGTGGATAGTTTCCACTCAGAAGAAATGCAGACTATTGCAACTGG  
AAGACAAGGAGAAGGAGAGCAGTATTTGTAGAGACCTTTTCATTTGTAAGCACTTGCG  
GAAATTCAATGATGCTCTCATTATCAGTGAAGATGCCCGCATTGAAGATGCTTTAGCCTACC  
TAAATGAATTTTTACAAATGTAAAAACGGACCATTACAGAGTTAGAGAAGCAGCTGACG  
GAGAAATTTCAAGAGAAAGAACAAGAGCTGAATGCTCTTTCAAAGATGAGTCAAATGAGA  
ATCCAAAGTTGGAAGAGCTTGCTTGCATCCTGGATGAAGCATACCACTATAACCCAGAGAC  
TCGCACTATTCTCTTTGCCAAGACAAGAGCCTTAGTAGCTGCTTTGAAAAAGTGGATTGAA  
GGAAACCCTCTTCTAGCCATATAAAGCCAGATGTGTTGATGGGTAAAGGAAGAAGAGATC  
AGAAAACAGGTATGACCTTGCCAATGCAGAAGGGTGTACTAGATGCATTGAGAAATGACAA  
AGACATCAGACTGCTAATTGCTACATCTGTTGCTGACGAAGGCATTGATATTACCGAGTGC  
AACCTTGTGGTGCTCTATGAATACTTTGGAAATGTCACCAAATGATCCAAGTCAGAGGTC  
GTGGAAGGGCAAGAGACAGCAAGTGCATCCTTGTGACAAGCAAGACAGAAGTGGTTGAGA  
ATGAAAAACGAAACAGTTACAAGGAAGAAATGATGAATGCAGCTATTGAAAAGCTACAGAA  
CTGGGATGAAACAACATTTGCAAGAAAGATACGTGGCCTGCAATGAAGGAAAAGATGGTA  
CGAGATTCCAGGAAGAACAACAAAACAAGAAATAGTAGAAGGGAAAAAAATCTTTTGT  
GTGGAATGCAAGCATATGTCTGCAGTACAGATGACATCAGAATTATAAAGGAATCTCAT  
CATACTGTCTTAGGTGATGCATTCAAGGAGCGTTATACAACAAAGCCCCACAGGAAACCTT  
CTCAATTTGATGGTTTTGAGAAAAAAGCAAGATGCATTGCCGAAATACTGAGTGTGAGCAT

GA CTGGGGGATCATAGTGAAGTACAAGATATTTGATAATCTACCAGTGATCAAAATCAGAA  
GCTTTGTACTAGAGGATGTTGAAACAGGGACACAAATGGATTTTCAGAAATGGAAAAGTATT  
AATTTGTCTTTGAAGGAGTTTGATGAAGAAACATCCAGCTGA

>merops\_nubicus-rig1

ATGACCGCGGAGGAGAAGAGGTGCCTGCGGTGCTACCGGAGGTACATCGAGAGGAGCCT  
GAACCCCGTCTACGTCTGAGCAACATGACGGCCTGGCTGCCGGACGAGGTGAAGGAGC  
GGGTCCGGAAGGAGGAGGAGAAGGGGGTGACGGCGGCCGCGCTGTTCTGTGGACGC  
CATCCTGCAGCTGGAGGAGGAGGGATGGTTCCGCGGCTTCCTGGACGCTCTGTTGCGGG  
CAGGTTACACCGGGCTGGCAGAGGGCAATTGAAAACCTGGGACTTTAGCAAACCTGGAAAAAC  
TGGACATGCACCGAGAGCTGCTGAAGCGGATAGAAGCAACAATGATAGAAGTTGACCCTG  
TAGCCCTCATGCCTTACATAAACACATGTCTGATAGAAAGGGATTGTGAGGAGATCCTGCA  
GATTAGTGAATATAGAAGCAAAGCAGCTGGGATAACGAAACTCATTGAATGTCTCTGTCTGA  
TCCGATAAAGAAAACCTGGCCTAAAAGTCTTCAGCTGGCACTAGATAACACTGGATATTATAG  
TGCAAGTGAACCTGTGGGATGCGAGAGAAGATAGTTGCACAGAAGCTTATAGTGAAATGACA  
GATGCCTCTGAGAGCAGCTTTGAAACCACAATGACATTTTCTGAAGAAGCAGAATGTGATA  
ATCTCAGTGAAAATCTAGATTCAAGTTTCAAGGGATCTATCATTCTTCACCTGTTTATGAG  
CCAAAGAAGGCTCGGAGCTACCAGACTGAACTTGCACAGCCTGCTATTAGTGGAAAAACA  
CATTGATATGTGCCCTACAGGATCTGGAAAACTTTTTGTGGCACTTCTGATTTGTGAACAC  
CATTTCCAAAACATGCCCTCAGGACAAAAGGCAAAAGTTGTCTTTCTTGCAACCAAAGTGC  
CAGTGTATGAACAACAGAAAACCTGTATTTAAGGAGTATTTTGAAAGAAGTGGATATTCTGTT  
CAAGGAATTAGTGGTGAACAATTGCAAATGTCTCGGTGGAAAGGGTTATACAGGACAGTG  
ACATCATTGTGCTAACACCCCAAGATTCTTGTGAACAGCATTGAGCAAGGGATCATTAGCTC  
CCTCTCCATCTTCACTCTGATGATATTTGATGAGTGCCACAACACTACGGGCAACCACTCT  
TACAATGTGTTAATGACCAGATACCTGGAACAAAAATTTGACTCCTCTGCAAAACCACTACC  
TCAGATTGTAGGTTTAACTGCTTCTGTTGGAGTTGGTAATGCCAAGACCGTCAAGGAAACA  
ATAGAGCACATCTGTACCCTCTGCTCCTACCTTGACATACAGGCCATATCCACCGTTAGAG  
AGAACAACAGGAACTGCAGAGATTTGGAAGCAAGCCAGAAATGCATGTCAGATGGGTAA  
AATGCGAGTTCAGAATCACTTTGCAGATATCATCTCAGGTCTGATGTCCAAGACAGAGGCA  
TTGATGAGGAAGATTTACTCAGTGGATACTATCTCCCATATCAACAAGAATGACTTTGGAAC  
ACAGAAATATGAACAGTGGATAGTTACCACTCAGAAGAAGTGCAAACCTGTTGCAACTGGCA  
GATAAGGAGAAGGAGAGCAGCATTTGTAGAGACCTTTTCATTTGCACTGAACACCTGCGGA  
AATTAAACGATACTCTCATCATCAGTGAGGATGCTCGCATTGAAGATGCTTTATTGTACCTA  
ACTGAATTTTTACAAATGTCAAAAATGGACCATACACAGAATTAGAGAAGCAACTGACAGC  
TCAATTTGAAGAGAAAGAACCAGAACTGACTGCCCTTTCAAAAGATGAATCAAATGAGAATC  
CCAAGCTGGAAGAGCTTGCTTGCATCTTGGATGAAGCATACCGCTATAATCCACAGACCCG  
CACTCTTCTCTTTGCTAAGACAAGAGCCTTAGTAGCTGCTTTGAAGAAGTGGATAGAAGCA  
AACCCTCTACTTAGCTACATAACGTCTGATGTGTTGATGGGTCGTGGAAGAAGAGATCAAA  
AGACAGGTATGACCCTCCCAATGCAGAAGATTATACTGGATGCATTCAAAACAAAGAAAGA  
CATGAGACTGCTAATTGCTACATCTGTTGCTGATGAAGGCATTGATATTTCTGAGTGCAACC  
TTGTTGTGCTGTATGAATACTTCGGTAATGTCACCAAATGATCCAAGTCAGAGGTCGTGG  
AAGGGCAAGAGACAGCAAGTGTATCCTTGTGACAAGCAAAGCAGAAGTGGTTGAAAACGA  
GAAATACAACCGCTATAAGGAAGAAATGATGAATGAAGCTATTGAAAAGCTACAGAAGTGG  
GATGAAATGACATTTTCCAGAAAGATACAAAGCTTACAAATGAAGGACAAGGTGTTACGAG  
ACTCCAGAAAGAAAGACAGAAGATGTCAGGTAGTGGAAGGGAAAAGAAATCTTCTGTGTG

GTAAATGCAAAGCATATGCCTGCAGTACAGATGACATCAGAGTTATAAAGGAATCTCATCAT  
ACTGTCCTAGGAGATGCGTTCAAGGAGCGTTACATAACAAAGCCTCACAGGAAGCCAGTC  
CAGTTTGATTGTTTTGAGAAAAAAGCAAGATGCATTGCCAAAATACTAATTGCCAGCATGA  
CTGGGGAATCACAGTGAAGTATAAGACATTTCGATAATCTACCAGTGATCAAAATCAAAAGCT  
TTGTAGTAGAGAACGTTGAAACCGGGACACAAATGGATTTTCAGAAATGGAGAGACATAAA  
CTTTGCTTTGAAGAATTTTGATGATGAATAA

>mixornis\_gularis-rig1

ATGACGGCGGAGGAGAAGCGGAACCTGCAGTGCTACAGGCGCTACATCGAGAGGATCCT  
GAACCCCGTGATACCTCAGCAACATGACGGACTGGCTGTCCGACGAGCTGAAGGAGAG  
AGTCAAAAAGGAGGAGGAGGAAAAGGGAGTGACGGCGGCCGCCGCGCTGTTCTTGATGCCG  
TGCTGCTGCTGGAGGAGGAGGGCTGGCTCCGGGGCTTCCTGGATGCCCTGGTTGCAGCA  
GGTTACACTGGACTGGCAGAAGCAATTGAAAACCTGGGACTTCAGTAACTGGAAAACTGG  
AGCTGCACAGGCAGCTGTTGAAGCGGATAGAAGCAACAATGCTAGAAATTGATCCTGTAG  
CAATCATGCCATACATAAACACATGCCTGATAGAGAGGGAGTGTGATGAGATCCTGCAGAT  
CAGTGAATACAGAAGCAAAGCAGCCGGGATAACTAACTCATTGAATGCCTCTGTGCTCG  
GATAAGGAAAACTGGCCCCAAAAGCCTTCAGCTGGCATTGGATAATGCAGGATATTACAATG  
CAAGTGAACCTGTGGAATATAAGAGAAGATAATGGCAAAGATGTTGATGGTGAAATGACAGA  
TGCCTCTGAGAATCACTTTGAAACCTTGATAACATTTTCTGAAGAAGCAGAATGTGATAATC  
TCAGTGAAAATCTCTCTTCAGGTnnAAAAAGCATCTATGAGTCTTCRTTTGTTTATCAACCAA  
AGAAGGCTCGGAGCTACCAGATTGAGCTTGACACAGCCTGCTATTGATGGGAAAAACACGT  
TGATTTGTGCCCCCACAGGATCTGGAAAACTTTTGTGGCACTTCTGATTTGTGAACATCAT  
TTGCAAAACGTTCCCTCTGGACGAAAGGCAAAAAGTTGTCTTCCTTGCAACCAAAGTGCCAG  
TGTATGAGCAACAGAAAAATGTATTCAGGCAGCATTTTGAAGAAGTGGATACTCCGTTCAA  
GGAATTTGTGGTGAAACAGTTGCAAATATGTCTGTAGAAAATGTTATACAGGATAGTGACAT  
CATTGTGCTAACACCCCAGATTCTTGTAATAGCATGGAGAAAGGCATCCTTAGCTCCCTC  
TCCATCTTCACTCTGATGATATTTGATGAGTGCCACAACACTACAGGCAACCACCCCTACAA  
TGTGTTGATGGCCAGATACCTGGATCAAAAATTTGACTCCTCTGCAAACCAGCTGCCCCAG  
ATTGTAGGTTTAACTGCTTCTGTTGGAGTTGGTAATGCCAAGAGCACTAATGAACTGTACA  
GCACATCTGTACCCTCTGCTCCTACCTTGACATACAGGCCATATCCACTGTCAGAGAGAAC  
AAACAAGATCTGCAGAGGTTTGGAACAAGCCAGAAACACATATAAGATGGGTTAAAATGC  
AAGCTCGGAATCACTTTGCAGACATTATCTCAGGTCTGATGTCTGAGACAGAGGTGTTGAT  
GAAGAGGACTTATTCCTGATAACATCTCCCAAATCAACAAGAATTACTTTGGAACACAGA  
GATATGAACACTGGATAGTTTCCACTCAGAGGAAATGCAGACTGTTGCAACTGGAAGATAA  
GGAGAAGGAGAGCAATATTTGTAGACACATTTTCATTTGACTGAACATTTGCGGAAATTCA  
ACGATGCTCTCATTATCAGTGAAGATGCCCGCATTGAAGATGCTTTAGCCTACCTAAATGAA  
TTTTTCACAAATGTAAAAAATGGACCATATACAGAGTTYGAGAAGCAACTGACGGAGAAATT  
TCAAGAGAAAGAACAAGAGCTGACTGCCCTTTCAAAGATGAGTCAAATGAGAATCCAAAG  
TTGGAAGAGCTCACTTGCATCCTGGATGAAGCATACCGCTATAACCCAGAGACTCGCACTA  
TTCTCTTTGCCAAGACAAGAGCCTTAGTAGCTGCTTTGAAGAAGTGGATAGAAGCAAACCC  
TGTACTIONGCCACATAAAGACAGATGTGTTYATGGGTAAAGGAAGAAGAGATCATAAAACA  
GGTATGACCCTGCCAATGCAGAAGGGTGTACTGGATGCATTGAGAAATGACAAAGACATCA  
GACTGCTAATTGCTACATCTGTTGCTGACGAAGGCATTGATATTAGTGAGTGCAACCTTGT  
GGTTCTCTATGAATACTTCGGAAATGTCACCAAAATGATCCAAGTCAGAGGTCGTGGAAGG  
GCAAAAGACAGCAAGTGCATCCTTGTGACAAGCAAAACAGAAGTGGTTGAGAATGAAAAAT



TAAACTGTTACAAGGAAGAAATGATGAATGCAGCTATCGAAAAGCTACAGAACTGGGATGA  
AACAACATTTGCAAGAACGATACATCAGCTGCAAATTAAGGAAAAGACACTACGAGATTCC  
AGGAAGAAAGAAACAAAACATAAAGTAGTGGAAGGGAAAAAAAACCTTTTGTGTGGAAAAT  
GCAAAGCATWTGTCTGCAGTACAGATGACATCAGAATTATAAAGGAATCTCATCACACTGT  
CCTAGGTGACGCGTTCAAGGAGCGTTATATAACAAAGCCCCACAGGAAACCGGTTCAGTTT  
GATGGTTTTGAGAAAAAAGCAAGATGCATTGCCGAAATACTGAGTGCCAGCATGACTGGG  
GGATCACAGTGAAGTACAAGACATTTGATAATCTACCAAGTGATCAAAATCAAAAGCTTTGTA  
CTAGAGAATGTTGAACTAGGACACAAATGGATTTTCAGAAATGGAAAAGTATTAATTTGTC  
TTTGAAGAATTTTGATGAAGAAACATCCAGCTGA

>nannopterum\_brasilianum-rig1

ATGACGGCGGAGGAGAAGCGGAGCCTGCGGTGCTACCGGCGGTACATCGAGAAGAGCCT  
CAACCCTGTCTACGTCCTGAGCAACATGACGCCCTGGCTGTCCGACGAGGTGAAGGAGAG  
AGTCCGTAAGGAGGAGGAGAAGGGGGTGACGGCGGCCCGCGCTGTTCTTGATGCC  
GTCCTGCAGCTGGAGGCGGAGGGCTGGCTGCGGGGCTTCCTGGACTCCCTGGTTGCAGC  
AGGTTATACTGGACTGGCAGAAGCAATTGAAAAGCTGGGACTTCAGCAAAGCTGGAAAACTG  
GAATTGCACAGACAGCTGTTGAAGCGGATAGAAGCAACAATGCTAGAAGTTGATCCAGTAG  
CACTCATGCCCTACATAAACACATGCCTGATAGAAAGGGAGTGTGAAGAGATCCTGCAGCT  
TTGTGAATACAGAAGCAAAGCAGCTGGGATAACTAACTCATTGAATGCCTCTGTGATCG  
GATAAGGAAAAGCTGGCCGAAAAGCCTTCAGCTGGCACTAGATACCACAGGATACTACAATG  
CAAGTGAGCTGTGGGATATGAGAGAAGATAATGGCAAAGATGTTGATGGTGAAATGACAGA  
TACCTTTGAGAACAGCTTTGAAACCATGATGACATTTTCTGAAGAAGCAGAATGTGATAATA  
ATCTCAGTGAAAATCTCTGTTTCAGCTTCAGAAGGGATCTATGAGTCTTCACACGTTTGTGAA  
CCAAAGAATGCTCGGAGCTACCAGATTGAAGCTGCACAGCCTGCTATCAATGGGAAAAACA  
CATTGATATGTGCCCCAACAGGATCTGGAAAACTCTTGTGGCACTTATGATTTGTGAACAC  
CATTTTCGAAAACATGCCACAGGAAGAAAGGCAAAAGTTGTCTTTCTTGCACTAAAGTGC  
CAGTGTACGAACAACAAAAAATTTATTCAAGCAGCATTTTGAAGAAGATGGATATTCTGTT  
CAAGGACTTAGTGGTGATACCGTTGCAAATGTCTCTGTAGAAAAGGTTATACAGGACAGTG  
ACATCATTGTACTGACACCCAGATTCTTGTGAATAGCATCAAGCAGCGGATCCTTAGCTC  
CCTCTCCATCTTCACTCTGATGATATTTGATGAGTGCCACAATACCATGGGCAACCACTT  
ACAATGTGTTGATGACCACATACCTGGAAGAAAAATTTGACTCCCCTGCAAACCACTGCC  
TCAGATTGTAGGTTTAACTGCATCTGTTGGAGTTGGTAATGCCACGACCATCGTGGAACG  
ATAGAGCACATCTGTACCATTTGCTCCTACCTTGACATACAGACCATATCCACTGTCAGAGA  
GAACAAACAGGATCTGCAGAGATTCGGAAACAAGCCAGAAACATCTGTCAGACTGGTTAAA  
ATGCGAGTTCAAATCACTTTGCAGACATTATCTCAGGTCTGATGTCTGAGACAGAGGCGT  
TGATGAGGAAGATTTACTCAGTGGATACTATGTCTCAAATGAGCAAGAAAGATTTTGAACA  
CAGAAATATGAACACTGGATAGTTTTCACTCAGAAGAAATGCAAAGCTTTGCAACTGGCGG  
ATAAGGAGAAGGAAAGCAGTATTTGTAGAGACCTTTTCATTTGCACTGAACACCTGCGGAA  
ATTCAACGATGCTCTCATTATTAGTGAAGACGCCCCGCATCGAAGATGCTGTAGCCTACCTA  
ACTGAATTTTTACAAATGTCAAAAATGGACCGTATACAGAGTTAGAGAAGCGACTGACAG  
CCAACCTTTCAAGAGAAAGAACCAGAAATGACTGCCCTTTCAAAGATGAATCAAATGAGAAT  
CCCAAGCTGGAAGAGCTTGCTTGATCCTGGATGAAGCATACCGCTATAACCCACAGACTC  
GCACTCTTCTCTTTGCTAAGACAAGAGCCTTAGTAGCTGCTTTGAAGAAGTGGATAGAAGC  
AAACCTCTACTTAGCCACATAAAGCCAGAAGTGTGATGGGTCGTGGAAGAAGAGATCAA  
AAAACAGGTATGACCCTCCCAATGCAGAAGGGTGTGCTGGATGCATTCAAACCAACAAAG

AGAGCAAACCTGCTAATTGCTACATCTGTTGCTGATGAAGGCATTGATATTTCTGAGTGCAAC  
CTTGTCGTA CTCTATGAATACTTCGGTAATGTCACCAAAATGATCCAAGTCAGAGGTCGTG  
GAAGGGCAAAAAACAGCAAGTGCATCCTTGTGACAAGCAAAGCAGAAGTGGTTGAGTATG  
AGAAACACAACCGTTATAAGGAAGAAATGATGAATGAAGCTATTGAAAAGCTACAGAATTG  
GGATGAAACAACATTTGCAAGAGAGATATGTGACCTGCAAATGAAAGAAAAGGCATTACGA  
GATTCCAGGAAGAAAGATACAAGACCTAAGTTAGTGGAAGGGAAAAAAATCTTCTGTGTG  
GAAAATGCAAAGCATATGCCTGCAGTACAGATGACATCAGAGTTATACAGGAATCTCATCA  
CACTGTCATAGGAGATGCGTTCAAGGAGCGTTATATACAAAGCCTCACCAGAAACCCATT  
CAGTATGATAGTTTCGTGAAAAAAAACAAGATGTATTGCCAAAATACTAATTGTCAGCATGA  
CTGGGGAATCACAGTGAAGTACAAGACGTTTGATAATCTACCAGTGATCAAATCAAAGC  
TTTGTACTAGAGAATGTTGAAACTGGGACACAAATGGAGTTTCAGAAATGGAGAGATATTAA  
TTTTTCTTTGAAGAATTTTGATGTTGAAGAAACACCCAGCTGA

>neopelma\_chrysocephalum-rig1

ATGACGGCGGAGGAGAAGAGAAACCTGCGGTGCTACAGGCGGTACATCGAGAGGATCCT  
GAACCCCGTCTACATCCTGAGCAACATGACGGACTGGCTGTCGGACGAGATGAAGGAGAG  
AGTGCGAAAGGAGGAGGAGAAGGGGGTGACGGCGGCCGCGCGCTGTTCTGGATACC  
GTGCTGCTGCTGGAGGCGGAAGGCTGGCTCCGGGGCTTTCTGGACGCCCTTGTTGCAGC  
AGGTTACACTGGACTGGCAGAAGCAATAGAAAACCTGGGACTTCAGCAAACCTGGAAAACTG  
GAACTGCACAGACAGCTGTTGAAGCGGATAGAAGCAACAATGCTAGAAATTGACCCAGTA  
GCACTCATGCCTTACATAAACACATGCCTGCTAGAGAGGGAGTGTGATGAGATCCTGCAGA  
TTAGTGAATACAGAAGCAAAGCAGCGGGGATAACTAACTCATTGAATGTCTCTGTGCTC  
GGATAAGGAAAACTGGCCGAAAAGTCTTCAGCTGGCATTGGATATGGCAGGATATTACAAT  
GCAAGTCAACTGTGGGATTTAAGAGAAGATAATGGCAAAGATGTTGATGGTGAAATGACAG  
GTGCTCTGAGAATTGCTTTGAAACCACGATAACATTTGCTGAAGAAGCAGAGTGTGATAA  
TAATCTCAGTGAAAATATTTCTTCAGTTTCAGGAATGGTCCATGGGTCTTCATCTGTTTATGA  
ACCAAAGAAGGCTCGAACCTACCAGATTGAACTTGACAGCCTGCTATCAATGGGAAAAAC  
ACATTGATATGTGCCCCTACAGGATCTGGAAAACTTTTGTGGCGCTTCTGATTTGTGAACA  
CCATTTGCAAAACGCGCCCTCTGGAAAAAAGCCAAAAGTTGTCTTTCTTGCAACCAAAGTG  
CCAGTGTATGAACAACAGAAAAATGTATTTCAGGCAGCATTTTGAAAGAAGTGGATATACTGT  
TCAAGGAATATGTGGTGAAACAGTTGCAAATGTCTCGGTAGAACACATTATACAGGACAGT  
GACATCATTGTGCTCACGCCCCAGATTCTTGTAATAGCATCGAGACTGGGATCCTTAGCT  
CTCTCTCCATCTTCACTCTGATGATATTTGATGAGTGTCAACAACCCACAGGCAACCAACCT  
TACAATGTGTTAATGACCAGATACCTGGAACAAAAATTTAACTCCTCTGCAACCAAGCTGCC  
TCAGATTGTAGGTTTAACTGCCTCTGTTGGAGTTGGTAATGCCAAGAACATCAAGGAACT  
ATAGAGCACATATGTACCCTTTGCTCCTACCTTGACATACAGGCCATATCCACTGTCAGAG  
AGAACAAAGAGGATCTGCAGAGATTTCGAAACAAACCAGAATCACATGTCAGATGGGTAA  
AATGCGAGCTCAGAATCACTTTGCAGACATTATCTCAGGTCTGATGTCTGAGACAGAGGCG  
ATGATGAGGAAGATTTACTCAGAGGATACTATCTCCCAAATCAACAGGAATGATTTTGAAC  
ACAGAAATATGAACACTGGATAGTTCTCACCCAGAAGAAATGCAGACTGTTGCAGCTGGCA  
GATAAGGAGAAGGAGAGCAACATTTGTAGAGACCTTTTCATTTGTACCGAACACTTGCGGA  
AATTCAACAATGCTCTCATTATCAGTGAAGATGCACGCATCGAAGATGCTTTAGCCTACCTA  
AATGAATTTTTACAAATGTGAAAAATGGACCATATACAGAGTTAGAGAAGCAACTGACGGA  
CAAATTTCAAGAGAAAGAACCAGAACTGACTGCCCTTTCAAAGATGAATCAAATGAGAATC  
CCAAGCTGGAAGAGCTTGCTTCCATCCTGGACGAAGCATATCGCTATAACCCACAACTCG

CACTATTGTCTTTGCCAAGACAAGAGCCTTAGTAGCTGCTTTGAAGAAGTGGATGGAAGCA  
AACCCCTCTACTTAGCCACATAAAGCCAGATGCGTTGATGGGTCAGGGAAGAAGAGAACATA  
AAACAGGTATGACCCCTGCCAATGCAGAAGGGTGTGCTGGATGCCTTCAAAACCGACAAAG  
ACAGCAGACTGCTAATTGCTACATCTGTTGCTGATGAAGGCATTGATATTTCTGAGTGCAAC  
CTTGTTGTGCTCTATGAGTACTTCGGTAATGTCACCAAAATGATCCAAGTCAGAGGTCGTG  
GAAGGGCAAAAGACAGCAAGTGTGTCCTTGTGACAAGCAAAGTGGAAAGTGGTTGAGAATG  
AAAAACAGAACC GTTATAAGGAAGAAATGATGAATGCAGCTATTGAAAACCTGCAGAACTG  
GGACGAAACAACATTTGCAAGAAAGATACGTGACCTGCAAATGAAGGAAAAGATATTACGA  
GATTGCAGGAAGAGAGAACTATAAAACATGAAGTAGTGGAAGGGAAAAAAATCTTCTGT  
GTGGAAAATGCAAAGCCTATGCCTGCTGTACAGATGACATCAGAATTATAAAGGACTCTCA  
TCACACTGTCCTAGGAGATGCATTCAAGGAGCGTTATATAACAAAGCCTCACCAGAAACCA  
CATGCATTTGATGTTTTTGAGAAACAAAGCAAGATGCATTGCCAAAAACTAATTGCCAGCA  
TGACTGGGGGATCACAGTGAAGTACAAAACATTTGATAATCTACCAATCATCAAAATCAGAA  
GCTTTGTAGTGGAGGACATTGAACTGGGACACAGATGGATTTTCAGAAATGGAAAAATAT  
TAATTCTTCTTTGAAGAATTTTGATGAAGAAACATCCAGCTGA

>nipponia\_nippon-rig1

ATGACCGCGGAGGAGAAGCGGAGCCTGCAGTGCTACAGGCGGTACATCGAGAGGTGTCT  
GAACCCCGTCTACATCCTCAGCAACATGACGGACTGGCTGTCCGACGAGATGAAGGAGAG  
AGTCCGGAAGGAGGAGGAGAAGGGGGTGACGGCGGCCGCCGCGCTGTTTCTGGATGCC  
ATCTTGACAGCTGGAGGTGGAGGGATGGCTGCGGGGGKTCCTGGACGCCCTGGCTGCAGC  
AGGCTACACTGGACTGGCAGAAGCAATTGAAAACCTGGGACTTCAGCAAACTGGAAAACT  
GGAGTTGCACAGACAGCTGTTGAAGAGGATAGAAGCGACAATGCTAGAAATTGATCCGGT  
AGTGCTCATGCCCTACATAAACACATGCCTGATAGAAAGGGAGTGTGATGAGATCCTGCAG  
ATTAGCGAATACAGAAGCAAAGCAGCTGGGATAACTAACTCATTGAATGTCTCTGTCTGAT  
CGGATAAGGAAAACCTGGCCGAAAAGCCTTCAGCTGGCACTAGATAACGCAGGATATTACAA  
TGCAAGTGAACGTGGGATATGAGAGAAGATAATGGCAAAGATGTTGATGGTGAAATGACA  
GATGCCTCTGAGAGCAGCTTTGAAACCACGATAACATTTTCTGAAGAAGCAGAATGTGATA  
ATCTCAGTGGAAATCTCTGTTTCAGCCTCAGAAGGGATCTATCAGTCTTCACCTGTTTATGAA  
GCAAAGAAGGCTCGGAACTACCAGACTGAACTTGACAGCCTGCTATCAATGGGAAAAAC  
ACACTGATATGTGCCCCACAGGATCTGGAAAACTTTTGTGGCACTTCTGATTTGTGAAC  
ACCATTTCCAAAACATGCCCGCAGGACAGAAAGCGAAAGTTGTCTTTCTTGCAACTAAAGT  
GCCAGTGTATGAACAACAGAGAAACGTATTTCAGGCAGCATTTTGAAGAAGTGGGTATCTT  
GTTCAAGGAATTAGTGGTGAAACAGTTGCAAATGTCTCTGTAGAAAAGGTTATACAGGACA  
GCGACATCGTTGTGCTGACGCCCCAGATTCTTGTAACAGCATCAAGGAGGGGTTCTTA  
GCTCCCTCTCCATCTTCACTCTGATGATATTTGATGAGTGCCACAACACTACAGGCAACCA  
CCCTTACAATGTGTTAATGGCCAGATACCTGGAACAAAAATTTGACGCCTCTGAAAACCAG  
CTGCCTCAGATTGTAGGTTTAACTGCTTCTGTTGGAGTTGGTAATGCCAAGAGCATCGAGG  
AAACGATAGAGCACATCTGTACCCTGTGCTCCTACCTTGACATCCAGGCCATATCCACTGT  
CAGAGAGAACAAAGAGGAGCTGCAGAGATTCAGAAACAAGCCAGAAACACATGTCAGATG  
GGTTAAGATGCGAGTTCAGAATCACTTTGCAGACATTATCAAAGGTCTGATGTCTGAGACA  
GAGGCGTTGATGAAGAAGGTTTACTCAGTGGATACTATGTCTCAAATCAACAAGAATGATTT  
TGGAACACAGAAATATGAACAGTGGATAGTTGGCACTCAGAAGAAATGCAGGCTGTTGCAA  
CTGGCAGACAAGGAGAAGGAGAGCAGCATTTGTAGAGACCTTTTCATTTGCACTGAACACC  
TGCGGAAATTCAATGATGCTCTCATCATCAGTGAAGATGCCCGCATTGAAGATGCTTTAGT

CTACTTAACTGACTTTTTACAAATGTCAAAAATGGACCATATACAGAGTTAGAGAAGCAAC  
TGACAGCCAAATTTCAAGAGAAAGAACCAGAAATGACTGCCCTTTCAAAGATGAATCAAAT  
GAGAATCCCAAGCTGGAAGAGCTTGCTTGCATCCTGGATGAAGCATACCGCTATAACCCA  
GAGACTCGCACTCTTCTCTTTGCTAAGACAAGAGCCTTAGTAACTGCTTTGAAGAAGTGGA  
TAGAAGCAAACCCTCTGTTTAGCCACATAAAGCCAGGTGTGTTGATGGGTCGTGGAAGAAG  
AGATCAAAAAACAGGTATGACTCTCCAATGCAGAAGGGTGTACTGGATGCATTCAAAACC  
AACAAAGACAGCAGGCTGCTAATTGCTACATCTGTTGCTGATGAAGGCATTGATATTTCTGA  
GTGCAACCTTGTTGTGCTCTATGAATACTTCGGTAACGTACCAAAATGATCCAAGTCAGA  
GGTCGTGGAAGGGCAAAAGACAGCAAGTGCATCCTTGTGACAAGCAAAACAGAAGTGTT  
GAGAATGAGAAACACAACCGTCATAAGGAGGAAATGATGAATGAAGCTATTGAAATACTAC  
AGAATTGGGATGAAACAACGTTTGCAAGAAGGATACATGACCTGCAAATGAAGGAAAAGGT  
ATTACGAGATTCCAGGAAGAAAGAAACAAGACCTAAGGTAGTGAAGGGAAAAAAATCTT  
CTGTGTGGAATGCAAAGCATATGCCTGCAGTACAGATGACATCAGAGTTATAAAGGTAT  
CTCATCACACTGTCCTAGGAGACGCATTCAAGGAGCGTTATATAACAAAGCCTCACCTGAA  
ACCCATCCAGTTTGATTGTTTTGAGAAAAAAGGCAAGATGTATTGCCAAAATACTAATTGCC  
AGCATGACTGGGGAATCACAGTGAAGTACAAGACATTTGATAATCTACCAGTGATCAAAAT  
CAAAAGCTTTGTAGTAGAGAACATTGAAACTGGGACACAAATGGATTTTCAGAAATGGAAAA  
ATATTAATTTTTCTTTGAAGAATTTTGATGTTGAAGAAACGGCCAGCTGA

>opisthocomus\_hoazin-rig1

ATGACGGCGGAGGAGAAGAGGAGCCTGCAGTGCTACCGGCGGTACATCGAGAGGAGCCT  
GAACCCCGTCTACATCCTCAGCAACATGGCGGCCTGGCTGCCCGACGAGGTTGAGGAGCG  
AGTTCGGAAGGAGGAGGAGAAGGGGGTGACGGCGGCCGCCGCGCTGTTTCTGGATGCC  
GTCTTGACAGCTGGAGGCCGAGGGCTGGCTCCGCGGCTTCGTGGACGCGCTGGCGGSAG  
CAGGTTACACTGGACTGGCAGAAGCAATTGAAAACCTGGGACTTCAGCAAACTGGAAAACT  
GGAGTTGCACAGACAGCTGTTGAAGCGGATAGAAGCAACAATGCTAGAAGTTGATCCAGT  
AGCACTCATGCCCTATATAAACATGTGCCTGATAGAAAGGAGTGTGATGAGATCCTGCAG  
ATTAGTGAATACAGAAGCAAAGCAGCTGGCATAACTAACTCATCGAATGCCTCTGTCCGT  
CGGATAAGGAAAACTGGCCGAAAAGCCTTCAGCTGGCACTAGATAACACAGGATATTACAC  
TGCTAGTGAACGTGTGGGACATGAGAGAAGGTAATGGCAAAGATGTTGATGGTGAAATGACA  
GATGGCTCTGAGAACAGCTTTGAAACGATGATAACGTTTTCTGAAGAAGCCCAATGTGATA  
ACAATCTCGGTGAAAATCCCTGTTACCTTCAGAAGGGATCTATCAGTCTTCACATGTTTGT  
GAACCAAAGAAGCCTAGGAGCTACCAGTCTGAACTTGCGCAGCCTGCTGTCAGTGGGAAA  
AACACACTGATCTGTGCTCCACAGGATCTGGAAAACTTTTGTTGGCACTTATGATTTGTGA  
ACATCATTTCCAAAACGTGCCTGCAGAACGGAAGGCGAAAGTTGTCTTTCTTGCAACTAAA  
GTGCCAGTGTACGAACAACAGAGAACTGTATTCAAGCAGCATTTTGAAAGAAGCGGATATT  
CTGTTCAAGGAATTAGTGGTGAAACAGTTGCAAATGTCTGTGTAGAAAAGGTTATACAGGA  
CAGTGACATCATTGTGCTGACACCCAGATTCTTGTAATAGCATCGAGGAAGGGATCCTT  
AGCTCTCTCTCCATCTTCACTCTGATGATATTTGATGAGTGCCACAACACTACTGGAAACCA  
CCCTTACAAGGTGTTAATGACCAGATACCTGGAACAAAAATTTGACTCCTCTGCAAACCAG  
CTGCCTCAGATTGTAGGTTTAACTGCTTCTGTTGGCGTTGGTAATGCCAAGAGCATCAATG  
AAACGATAGAGCATGTCTGTACCCTCTGCTCCTACCTTGACATACAGGCCATATCCACTGT  
CAGAGAGAACAAAGAGGAACTGCAGAGATTGCGAAACAAGCCAGAACTTATGTCAGATG  
GGTAAAATGCGAGCTCAGAATCACTTTGCAGACATAATCTCAGGTCTGATGTCTGAGACA  
GAGTTGTTGATGAGGAAGATTTACTCAGTGGATACTATCTCTCAAATCAACAAGAAGGATTT

TGGAACACAGCAATATGAACACTGGATAGTTGCCACTCAGAAGAAATGCAGACTGTTGCAA  
CTGGCAGATAAGGAGAAGGAGAGCAGCATTTGTAGACACCTTTTCGTTTGCAGTGAACACC  
TGCGGAAGTTCAACGATGCTCTCATCATCAGTGAAGATGCCCGCATCGAAGATGCTTTAGC  
CTACCTAACTGAATTTTTTACAAATGTCAAAAATGGGCCATATACAGAGTTAGAGAAGCAAC  
TGACAGCCAAATTTGAAGAGAAAGAACCAGAACTGACTGCCCTTTCAAAAGATGAATCAAA  
CGGCAATCCCAAGCTGGAGGAGCTTGCTTGCATCCTGGATGAAGCATATCGCTATAACCC  
ACAGACTCGCACTCTTCTCTTTGCTAAGACAAGAGCCTTAGTAGCTGCTTTGAAGAAGTGG  
ATAGAATCAAACCCTCTACTTAGCCATATAAAGCCAGATGTGCTGATGGGTGCTGGAACAA  
GAGATCAAATAACAGGTATGACCCTGCCAATGCAGAAGGGTGTACTGGATGCATTGAGAAC  
CAACACAGACAGCAGACTGCTAATTGCTACATCTGTTGCTGACGAAGGCATTGATATTTCT  
GCATGTAACCTTGTTGTGCTCTATGAATACTTCGGTAATGTCATCAAAATGATCCAAGTCAG  
AGGTGCTGGAAGGGGCAAAAGACAGCAAGTGCATCCTTGTGACAAGCAAAACAGAAGTGGT  
TGAGAGTGAGAGACATAACCGTTATAAGGAAGAAATGATGAATGAAGCTATTGAAAAGCTA  
CAGAATTGGGATGAATCAACATTTGCAAGAAAGGTACATGACCTGCAATGAAGGAAAAGA  
TATTACGAGATTACAGGAAGAATGAAACCAGACCTAAGATAGTGCAAGGGAAGAAAAACCT  
TCTGTGTGGAAAATGCAAGGCATATGCCTGCAGTACAGATGACATCAGAGTTATAAAGGAA  
TCTCATCACATCGTCCTAGGAGACGCATTCAAGGAACGTTACATAACAAAGCTGCACACGA  
AGAAAGCCCGAGTTTGATTGTTTTGTGAAAAAAGCAAGATGCACTGCCAAAATACTAATTGC  
CAGCATGACTGGGGAATCATAGTGAAGTACAAGACATTTCGATAATCTACCAGTGATCAAAA  
TCAAAAGCTTTGTAGTTGAGAACGTTGACACGGGGACACAAATGGATTTTCAGAAATGGAG  
AAATATTAATTTTTCTTTGAAGAATTTTGATGTTGAAGAAACATCCAGCTGA

>otus\_sunia-rig1

ATGACCGCGGAGGAGAAGAGGAACCTGCAGCGCTGCAGGCGGTACATCGAGAGGAGCCT  
GAACCCCATCTACGTCCTGAGCAACATGACAGACTGGCTGTCCGACGATGTGAAGGAGAG  
AGTCCGGAAGGAGGAGGAGAAGGGGGTGACGGCGGCTGCCGCACTGTTTCTGGACGCC  
GTCCTGCAGCTGGAGGCGCAGGGCTGGCTCCGGGCCTTCTGGACGCCCTGGTTGCAGC  
AGGTTACACTGGACTGGCAGAAGCAATTGAAAACCTGGGACTTCAGCAAACCTGGAAAACTG  
GAGTTGCACAGACAGCTCTTGAAGCGCATAGAAGCAACAATGCTAGAAGTTGATCCGGTA  
GCACTCATGCCTTACATAAACACGTGTCTGATAGAAAGGGAGTGTGATGAGATCCTGCAGA  
TTAGCGAATACAGAAGCAAAGCAGCTGGGGTAACTAACTCATTGAATGCCTCTGTGATC  
GGATAAGGAAAACTGGCCGAAAAGCCTTCAGCTGGCACTAGATAATGCAGGATATTACAAT  
GCAAGTGAACGTGTGGGATATGAGAGAAGATAATGGCAAAGATGATGATGGTGAAATGACA  
GATGTCTCTGAGAACAGCTTTGAAACCACAATTACATTTTTTGAAGAAGCAGAATGTGATAA  
TAATCTCAGTGAAAATCTTTGTTTCAGCTTCAGAAGGGACCTGTCAGTCTTCACCTGTTTATG  
AACCAAAGAAGGCTTGGAGCTACCAGACTGAACTTGACACAGCCTGCTATCAATGGGAAAAA  
CACGTTGATATGTGCCCCACAGGATCTGGAAAAACTTTTGTGCACTTCTGATTTGTGAA  
CACCATTTCCAAAACATGTCCTCAGGACAAAAAGCAAAAGTTGTCTTTCTTGCAACCAAAGT  
GCCAGTGTATGAACAACAGAAAAATGTATTCAGGCAGCATTTTGAAGAAGTGGATATTCT  
GTTCAAGGAATTAGTGGTGAAACAGTTGCAAATGTTTCTGTAGAAAAGGTTATACAGGACA  
GTGACATCATTGTGCTAACACCCACAGATTCTTGTGAATAGTATCGAGGAGGGGATCATTAG  
CTCCCTCTCCATCTTCACTCTGATGATATTTGATGAGTGCCACAACACCACGGGCAATCAC  
CCTTACAATGTGTTAATGACCAGATACCTGCAACAAAAATTTGACTCCTCTGCAAGCCAGCT  
GCCTCAGATTGTAGGTTTAACTGCTTCTGTTGGAGTTGGTAATGCCAAGAGTGTCAAAGAA  
ACGATAGAGCACATCTGTACCCTCTGCTCCTACCTTGACATACAGGCCCTGTCCACTGTCA

GAGAGAACAAAGAGGATCTGCAGAGATTGAGAAACAAGCCAGAAACATATGTCAGATGGG  
TTAAAATGCGAGTTCAGAATCACTTTGCAGACATTATCTCAGGTCTGATGTCTGAGACAGAG  
GCGCTGATGAGGAAGAATTACTCAGTGGATACTATCTCCCAAATCAACAAGAATGATTTTG  
GAACACAGAAATATGAACACTGGATAGTTGCTACTCAGAAAAAATGCAGGCTGTTGCAACT  
GGCAGATAAGGAGAAGGAGAGCAGCATTGTAGAGACCTTTTCATCTGTACTGAGCACCTG  
CGGAAACTCAATGATGCTCTCATCATTAGTGAAGACGCCCGCATCGAAGATGCTTTAGCTT  
ACCTAACTGAATTTTTCACAAATGTTAAAAATGGACCCTATACAGAATTAGAGGAGCAACTA  
ACAGCCAAATTTCAAGAGAAAGAACCAGAACTGACTTCCCTTTCAAAAGATGAATCAAATGA  
GAATCCCAAGCTGGAAGAGCTTGCTTGCATCCTGGATGAAGCATACCGCTATAACCCACAG  
ACTCGCACTCTTCTCTTTGCTAAGACAAGAGCCTTAGTAGCTGCTTTGAAGAAGTGGATAG  
AAGCAAATCCTCTACTTAGCTACATAAAGTCAGATGTGTTGATGGGTCGTGGAAGAAGAGA  
TCAAAAAACAGGTATGACCCTCCCAATGCAGAAGGATGTACTGGATGCATTCAAACCAAC  
GAAGACAGCAGACTGCTAATTGCTACCTCTGTTGCTGACGAAGGCATTGATATTTCCGAGT  
GCAACCTTGTTGTGCTCTATGAATACTTTGGTAATGTCACCAAAATGATCCAAGTAAGAGGT  
CGTGGAAGGGCAAGAGGTAGCAAGTGCATCCTTGTGACAAGCAAAAAAGAAGTGGTTGAG  
AATGAGAAACACAACCGTTACAAGGAAGAAATGATGAATGAAGCTATTGAAAAGCTACAGA  
ATTGGGATGAAACAACATTTGCAAGAAAGATACATGACCTGCAAGTGAAGGAAAAGGCATT  
ACGAGATTCCAGGAAGAAAGAAACAAGACGTACAGTAGTGGAAGGGAAAAAAAATCTTCTG  
TGTGGAATAATGCAAAGCATATGCCTGTAGTACAGATGACATCAGAGTTATAAAGGAATCTC  
ATCACACTGTCCTAGGAGATGCGTTCAAGGAGCGTTACATAACAAAGCCTCACCAGAAGCC  
AGTCCGGTTTTGATTGTTTTGAGAAAAAAGCAAGATGCATTGCCAAAATGCTAATTGCCAAC  
ATGACTGGGGAATCATAGTGAAGTACAAGACATTTGATAACCTACCAGTGATCAAATCAAA  
AGCTTTGTAGTAGAGAACGTTGAAACTGGGACACAAATGGAACCTTCAGAAATGGAAAAATA  
TTAATTTTTCTTTGAAGAATTTTGATGTTGAAGAAACATCCAGCTGA

>pandion\_haliaetus-rig1

ATGACGGCGGCGGAGAAGAGGAGCCTGCAGTGCTACAGGCGGTACATCGAGAAGAGCCT  
GAACCCCGTCTACATCCTGGGCAACATGACGGACTGGCTGTCCGACGAGGTGAAGGAGA  
GAGTCCGAAAGGAGGAGGAGAAGGGGGTGACGGCGGCCGCCGCGCTGTTCTGGACGC  
CATCTTGCAGCTGGAGGTGGAGGGCTGGCTGCGGGGCTTCCTGGACGCTCTGGTTGCAG  
CAGGGTACACTGGACTGGCAGAAGCAATTGAAAATGGGACTTCAGCAAATGGAAAAAC  
TGGAGTTGCACAGACAGCTGTTGAAGCGGATAGAAGCAACAATGCTAGAAGTTGATCCAGT  
AGCACTCATGCCTTACATAAACACATGCCTGATAGAAAGGGAGTGTGATGAGATCCTGCAG  
GTCAGCGAATACAGAAGCAAAGCAGCTGGGATAACTAACTCATTGAATGTCTCTGTGAT  
CGGATAAAGAAAATGGCCAAAAAGCCTTCAGCTAGCACTAGATAATGCAGGATATTACAA  
TGCAAGTGAACGTGTTGGATATGAGAGAAGATAATGGCAAAGATGTTGATGATGAAATGACA  
GATGCCTCTGAGAACAGCTTTGAAACCATGGTGATGTTTTCTGAAGAAGCAGAATGTGATA  
ATAATCTCAGTGAAAATCTCTGTTGAGCTTCAGAAGGGATCTGTAAGTCTTCACGTGTTTAT  
GAACCAAAGAAGGCTCGGAGCTACCAGACTGAACTTGACAGCCTGCTATCAATGGGAAA  
AACACATTAATATGTGCCCTACAGGATCTGGAAAACTTTTGTGGCACTTCTGATTTGTGA  
ACACCATTTCCAAAACATGCCCTCAGGACAAAAGGCGAAAGTTGTCTTTCTTGCAACCAA  
GTGCCAGTGTATGAACAACAGAAAATGTATTGAGACAGCATTGTTGAAAGAAGTGGATACT  
CTGTTCAAGGAATTAGTGGTGAAACAGTTGCAAATGTCTCCGTAGAAAAGTTATACAGGA  
CAGTGACATCATTGTGCTAACACCCAGATTCTTCTGAATAGCATTGAGGAAGGGATCCTT  
AGCTCCCTCTCCATTTTCACTCTGATGATATTTGACGAATGCCACAACACTACGGGCAATCA

CCCTTACAATGTATTAATGAGCAGAKACTTGGAACAAAAATTTGActcCTCTGCAAGCCAGCT  
GCCTCAGATTGTAGGTTTAACTGCTTCTGTTGGAGTTGGTAATGCCAAGAGCATCAAGGAA  
ACGATAGAGCACATCTGTACCCTCTGCTCCTACCTTGATATACAGGCCATATCCACTGTCA  
GAGAGAACAACAGGATCTGCAGAGATTTGGAACAAACCAGAAACACATGTCAGATGGGT  
TAAAATGCGAGTTCAGAATCACTTTGCAGACATTATCTCAGGTCTGATGTCTGAGACGGAG  
GCATTGATGAGGAGGATTTACTTAGTGGACACTATCTCCCAGATCAACAGAAATGATTTTG  
GAACACAGAAATATGAACACTGGATAGTTGCCACTCAGAAGAAATGCAGGCTGTTGCAACT  
GGCAGATAAGGAGAAGGAGAGCAGCATTGTAGAGACCTTTTCATTTGCACTGAACACCTG  
CGGAAATTCAATGATGCTCTCATCATTGGTGAAGATGCCC GCATCGAAGATGCTTTAGCCT  
ACCTAACTGAATTTTTCACTAACGTAAAAAATGGACCATATACAGAGTTACAGAAGAACTG  
ACAGCCAAATTTGAAGAGAAAGAACCAGAACTGACTGCCCTTTCAAAGATGAGTCAAATG  
AGAATCCCAAGCTGGAAGAGCTTGCTTGCATCCTGGAGGAAGCATACCGCTATAACCCAC  
AGACTCACACTCTTCTCTTTGCTAAGACAAGAGCCTTAGTAGCTGCTTTGAAGAAGTGGAT  
GGAAGCAAACCCTCTACTTAGCCACATAAAGCCAGGTGTATTGATGGGTCTGTTGACGAAG  
AGATCAAAAAACAGGTATGACCCTCCCAATGCAGAAGGACGTACTGGATGCATTCAAACCC  
AACAAAGAAAACAGACTGCTAATTGCTACATCTGTTGCTGATGAAGGCATTGATATTTCTGA  
GTGCAACCTTGTTGTGCTCTATGAATACTTCGGTAATGTCACCAAATGATCCAAGTCAGAG  
GTCGTGGAAGGGCAAAGACAGCAAGTGCATCCTTG TGACAAGCAAATAGAAGTGGTTG  
AGAATGAGAAACACAACCGTTATAAGGAAGAAATGATGAATGAAGCTATTGAAAAGCTACA  
GAGTTGGGATGAAACAATATTTGCAAGAAAGATACATGACCTGCAAATGAAGGAAAAGGTA  
TTACGAGATTCCAGGAAGAAAGAAACAAGAAGTAAGGTAGTGGAAGGGAAAAAAATCTTC  
TGTGTGGAATGCAAAGCATACGCCTGCTGTACAGATGACATCAGAGTTATAAAGGAATC  
TCATCACACTGTCCTAGGAGATGCATTCAAGGAGCGTTATATAACAAAGCCTCACCAGAAA  
CCAATCCAGTTTGATTGTTTTGAGAAAAAAGCAAGATGTATTGCCAAACACTAATTGCCA  
GCATGACTGGGGAATCATAGTGAAGTACAAGACATTTGATAATCTACCAGTGATCAAAATCA  
AAAGCTTTGTATTAGAGAATATTGAAACTGGGACACAAATGGATTTTCAGAAATGGAAGAGT  
ATTAATTTTTCTTTGAAGAATTTTGATGAAGAAACATCCAGCTGA

>paradisaea\_rubra-rig1

ATGACGGCGGACGAGAAGAGGAACCTGCGGTGCTACAGGCGGTACATCGAGAGGAGCCT  
GAACCCCGTGATACATCCTCGGCAACATGACGGACTGGCTGTCCGACGAGGTGAAGGAGA  
GAGTCCGAAAGGAGGAGGAGAAGGGGGTGACGGCGGCCGCCGCGCTGTTCTGGATGC  
CGTGCTGCTGCTGGAGGCGGAGGGCTGGCTGCGGGGCTTCCTGGATGCCCTGGTTGCCG  
CAGGTTACACTGGA CTGGCAGAAGCAATTGAAA CTGGGACTTCAGCAAGCTGGAAAACT  
GGAGCTGCACAGGCAGCTGTTGAAGCGGATAGAAGCAACAATGCTAGAAATTGATCCAGT  
AGCAATCATGCCGTACATAAACACATGCCTGATAGAGAGGGAGTGTGATGAGATCCTGCA  
GATCAGTGAATACAGAAGCAAAGCAGCCGGGATAACTAACTCATTGAATGCCTCTGTGCG  
TCGGATAAAGAAA CTGGCCCAAAGTCTTCAGCTGGCATTGGATAATGCAGGGTATTACA  
ATGCAAGTGA ACTGTGGAATATAAGAGAAGGTAATGGCAAAGATATTGATGATGAAATAAC  
AGGTGCCTCTGAGAATTACTTTGAAACCATGGTGACATTTTCTGAGGAAGCAGAATGTGAT  
AATCTCAGTGAAAATCTCTCTTCAGCTTCAGAAAGGGTCTGTGAGTCTTCATCTGTTTATGA  
ACCAAAGAAGGCTCGGAGCTACCAGATTGAGCTTGACACAGCCTGCAATTGATGGGAAAAA  
CACATTGATTTGTGCCCCACAGGATCTGGAAAACTTTTGTGGCACTTCTGATTTGTGAAC  
ATCATTGCAAAACATTCCTTCAGGACGAAAGGCAAAAGTTGTCTTCCTTGCAACCAAAGTG  
CCAGTATATGAGCAACAGAAAAATGTATTCAGGCAGCATTTTGAAGAAGTGGATACTCTGT

TCAGGGAATTTGTGGTGAAACAGTTGCAAATATCTGTGTAGAAAATGTTATACAGGACAGC  
GACATCATTGTGCTAACGCCCCAGATTCTTGTGAATAGCATGGAGAAAGGGATCCTTAGCT  
CCCTCTCCATCTTCACTCTGATGATATTTGATGAGTGCCACAACACTACAGGCAACCAACC  
TTACAATGTGTTGATGGCCAGATACCTGGATCAAAAATTTGACTCCTCTGCAAACCAGCTG  
CCTCAGATTGTAGGTTTAACTGCTTCTGTTGGAGTTGGTAATGCCAAGAGCATCAATGAAA  
CTGTAGAGCACATCTGTACCCTCTGCTCCTACCTTGACATACAGGCCATATCCACTGTCAG  
AGAGAACAACAAGATCTGCAGAGGTTTCGGAAATAAGCCAGAAACACATATCAGATGGGTT  
AAAATGCGAGCTCAGAATCACTTTGCAGACATTATCTCAGGTCTGATGTCTGAGACAGAGG  
TGTTGATGAGGAAGATTTACCCAGTGGATACCATCTCTCAAATCAACAAGAATTACTTTGGG  
ACACAGAGATATGAACACTGGATAGTTTTCACTCAGAAGAAATGCAGACTGCTGCAACTGG  
AAGATAAGGAGAAAGAGAGCAACATTTGTAGAGACCTTTTCATTTGTAAGCACTTGCG  
GAAATTCAACGACGCTCTCATTATCAGTGAAGATGCCCGCATCGAAGATGCTTTAGCCTAC  
CTAAATGAATTTTTCACAAATGTAAAAAATGGACCATATACAGAGTTAGAGAAGCAACTGAC  
GGACAAATTTCAAGAGAAAGAACCAGAGCTGACTGCCCTTTCAAAGATGAGTCAAATGAG  
AATCCAAAGCTGGAAGAGCTTGCTTGCATCCTGGATGAAGCATAACCGCTATAACCCACAGA  
CTCGCACTATTCTCTTTGCCAAGACGAGAGCCTTAGTAGCCGCTTTGAAGAAGTGGATACA  
AGCAAACCTCTACTTAGCCACATAAAGCCAGATGTGTTGATGGGTAAGGGAAGTAAAGAT  
CATAAAACAGGTATGACTCTGCCAATGCAGAAGGGTGTACTGGATGCATTCAGGAATGACA  
AAGACATCAGACTGCTAATTGCTACATCTGTTGCTGACGAAGGCATTGATATTACTGAGTG  
CAACCTTGTGGTGCTCTATGAATACTTCGGTAATGTCACCAAAATGATCCAAGTCAGAGGT  
CGTGGAAGGGCAAGAGACAGCAAGTGCATCCTTGTGACAAGCAAAAGAGAAGTGGTTGAG  
AATGAAAAACAAAACAGTTATAAGGAAGAAATGATGAATGCAGCTATTGAAAATCTACAGAA  
CTGGGATGAAACAACATTTGCAAGAAAGATACGTGACCTGCAAATGAAGGAAAAGAACTA  
CGAGATTCCAGGAAGAACGAAACAAAACATAAAGTAGTGGAAGGGAAAATAAATCTTTTGT  
GTGGAAAATGCAAAGCATATGCCTGCAGTACAGATGACATCAGAGTTATAAAGGAATCTCA  
TCACACTGTCCTAGGTGATGCATTCAAGGAGCGTTATATAACAAAGCCCCACAGCAAACCTG  
CTTCAGTTTGTATGGTTTTGAGAAAAAAGCAAGATGCATTGCCGAAATACTGACTGCCAGC  
ATGACTGGGGGATCACAGTGAAGTACAAGACATTTGATAATCTACCAGTGATCAAATCAA  
AAGCTTTGTACTAGAGAATGTTGAAACTGGGACACAAATGGATTTTCAGAAATGGAGAAGT  
ATTAATTTCTCTTTGAAGAATTTTGTATGAAGAAAATGAGCTGAACTCAACATTTTAA

>parotia\_lawesii-rig1

ATGACGGCGGACGAGAAGAGGAACCTGCGGTGCTACAGGCGGTACATCGAGAGGAGCCT  
GAACCCCGTGATACATCCTCGCCAACATGACGGACTGGCTGTCCGACGAGGTGAAGGAGA  
GAGTCCGAAAGGAGGAGGAGAAGGGGGTGACGGCGGCCGCCGCGCTGTTCTGGATGC  
CGTGCTGCTGCTGGAGGCGGAGGGCTGGCTGCGGGGCTTCCTGGATGCCCTGGTTGCCG  
CAGGTTACACTGGAAGTGGCAGAAGCAATTGAAAAGTGGGACTTCAGCAAGCTGGAAAACT  
GGAGCTGCACAGGCAGCTGTTGAAGCGGATAGAAGCAACAATGCTAGAAATTGATCCAGT  
AGCAATCATGCCATATATAAACACATGCCTGATAGAGAGGGAGTGTGATGAGATCCTGCAG  
ATCAGTGAATACAGAAGCAAAGCAGCCGGGATAACTAACTCATTGAATGCCTCTGTCGCT  
CGGATAAAGAAAAGTGGCCCAAAAGTCTTCAGCTGGCATTGGATAATGCAGGGTATTACAA  
TGCAAGTGAAGTGTGGAATATAAGAGAAGGTAATGGCAAAGATATTGATGATGAAATAACA  
GGTGCCTCTGAGAATTACTTTGAAACCATGGTGACATTTTCTGAAGAAGCAGAATGTGATAA  
TCTCAGTGAAAATCTCTCTTCAGCTTCAGAAAGGGTCTATGAGTCTTCGTCTGTTTATGAAC  
CAAAGAAGGCTCGGAGCTACCAGATTGAGCTTGACAGCCTGCAATTGATGGGAAAAACA



CATTGATTTGTGCCCCACAGGATCTGGAAAACTTTTGTGGCACTTCTGATTTGTGAACAT  
CATTGCAAAACATTCTTCAGGACGAAAGGCAAAAGTTGTCTTCCTTGCAACCAAAGTGC  
CAGTATATGAGCAACAGAAAAATGTATTCAGGCAGCATTTTGAAAGAAGTGGATACTCTGTT  
CAGGGAATTTGTGGTGAACAGTTGCAAATATCTGTGTAGAAAATGTTATACAGGACAGCG  
ACATAATTGTGCTAACGCCCCAGATTCTTGTGAATAGCATAGAGAAAGGGATCCTTAGCTC  
CCTCTCCATCTTCACTCTGATGATATTTGATGAGTGTCAACAACACTACAGGCAACCACCCTT  
ACAATGTGTTGATGACCAGATACCTGGATCAAAAATTTGACTCCTCTGCAAACCAGCTGCC  
TCAGATTGTAGGTTTAACTGCTTCTGTTGGAGTTGGTAATGCCAAGAGCATCAATGAACTG  
TAGAGCACATCTGTACCCTCTGCTCCTACCTTGACATACAGGCCATATCCACTGTCAGAGA  
GAACAAACAAGATCTGCAGAGGTTCCGAAATAAGCCAGAAACACATATCAGATGGGTTAAA  
ATGCGAGCTCAGAATCACTTTGCAGACATTATCTCAGATCTGATGTCTGAGACAGAGGTGT  
TGATGAGGAAGATTTACCCAGTGGATACCATCTCTCAAATCAACAAGAATTACTTTGGGACA  
CAGAGATATGAACACTGGATAGTTTTCACTCAGAAGAAATGCAGACTGCTGCAACTGGAAG  
ATAAGGAGAAGGAGAGCAACATTTGTAGAGACCTTTTCATTTGTAAGCACTTGCGGAA  
ATTCAACGACGCTCTCATTATCAGTGAAGATGCCCCGATCGAAGATGCTTTAGCCTACCTA  
AATGAATTTTTACAAATGTAAAAAATGGACCATATACAGAGTTAGAGAAGCAACTGACGGA  
CAAATTTCAAGAGAAAGAACCAGAGCTGACTGCCCTTTCAAAGATGAGTCAAATGAGAAT  
CCAAAGCTGGAAGAGCTTGCTTGCATCCTGGACGAAGCATACCGCTATAACCCACAGACT  
CGCACTATTCTCTTTGCCAAGACGAGAGCCTTAGTAGCTGCTTTGAAGAAGTGGATACAAG  
CAAACCTCTACTTAGCCACATAAAGCCAGATGTGTTGATGGGTAAGGGAAGTAAAGATCA  
TAAACAGGTATGACCCTGCCAATGCAGAAGGGTGTACTGGATGCATTCAGGAATGACAAA  
GACATCAGACTGCTAATTGCTACATCTGTTGCTGACGAAGGCATTGATTAAGTGAAGTGA  
ACCTTGTTGGTGCTCTATGAATACTTCGGTAATGTCACCAAATGATCCAAGTCAGAGGTG  
TGGAAGGGCAAAAGACAGCAAGTGCATCCTTGACAAAGCAAAAGAGAAGTGGTTGAGAA  
TGAAAAACAAAACAGTTATAAGGAAGAAATGATGAATGCAGCTATTGAAAAGCTACAGAACT  
GGGATGAAACAACATTTGCAAGAAAGATACGTGACCTGCAAATGAAGGAAAAGAACTACG  
AGATTCCAGGAAGAACGAAACAAAACATAAAGTAGTGGAAGGGAAAATAAATCTTTTGTGT  
GGAAAATGCAAAGCATATGCCTGCAGTACAGATGACATCAGAGTTATAAAGGAATCTCATC  
ACACTGTCCTAGGTGACGCATTCAAGGAGCGTTATATAACAAAGCCCCACAGCAAACTGCT  
TCAGTTTGATGGTTTTGAGAAAAAAGCAAGATGCATTGCCGAAATACTGACTGTCAGCAT  
GATTGGGGGATCACAGTGAAGTACAAGACATTTGATAATCTACCAGTGATCAAAATCAAAA  
GCTTTGTAAGTGAAGTGAAGTGAAGTGAAGTGAAGTGAAGTGAAGTGAAGTGAAGTGAAGT  
AATTTCTCTTTGAAGAATTTTGATGAAGAAAATGAGCTGAAGTGAAGTGAAGTGAAGTGAAGT  
AATTTCTCTTTGAAGAATTTTGATGAAGAAAATGAGCTGAAGTGAAGTGAAGTGAAGTGAAGT

>parus\_major-rig1

ATGACGGCGGAGGAGAAGCAGAGCTTGCGGTGCTTCAGGCGGTACATCGAGAGGATCCT  
GAACCCCGTGACATCCTCGGCAACATGACGGCCTGGCTGTCCGACGAGGTGAAGGAGA  
GGGTCCGAAAGGAGGAGGAGAAGGGGGTGACGGCGGCCGCCGCTGTTCTTGATGC  
CGTGCTGCTGCTGGAGGAGGAGGGCTGGCTGCGGGGCTTCCTGGATGCCCTGGTGGCA  
GCAGGTTACACTGGACTGGCAGAAGCAATTGAAAAGTGGGACTTCAGCAAGCTGGAAAAA  
CTGGAGCTGCACAGGCAGCTGTTGAAGCGGATAGAAGCAACAATGATAGAAATTGATCCT  
GTAGTAATCATGCCATACATAAACACATGCCTGATAGACAGGGAGTGTGATGAGATCCTGC  
AGATCAGTGAATACAGAAGCAAAGCGGCCGGGATAACTAACTCATTGACTGCCTCTGTGC  
CTCAGATAAGGAAAAGTGGCCCAAAGTCTTCAGCTGGCATTGGATAATGCAGGATATTAC  
AATGCAAGTGTACTGTGGAATATAAGAGAAGATAATGGCAAAGATGTGGATAGTGAAATGA

CAGATGCCTCTGAGAATTACTTTGAAACCATGGTGACCTTTTCTGAAGAAGCAGATTGTGAT  
AATCTCAGCAAAAATCTCTCTTCGGCTTCAGAAAGCGTCTATGCATCTCCGTCTGTTTATGA  
ACCAAAGAAGGCTCGGAGCTACCAGATTGAGCTTGACACAGCCTGCTACTGATGGGAAAAA  
CACATTGATTTGTGCCCCCACAGGATCTGGAAAACTTTTGTGGCACTTATGATTTGTGAAC  
ATCATTGTGAAAACATTCCGTCAGGACGAAAGGCAAAAAGTTGTCTTCCTTGCAACCAAAGT  
GCCAGTGTATGAGCAACAGAAAAATATATTCAGGCAGCATTTTGAAGAAGTGGATACTCC  
GTTCAAGGAATTTGTGGTGAAACAGTTGCAAATATCTCTGTAGAAAATATTATACAGGACAG  
TGATATCATTGTGATAACACCCCAGATTCTTGTGAATAGCATGGAGAAAGGGATCCTTAGCT  
CCCTCTCCATCTTCACTCTGATCATATTTGATGAGTGCCACAACACTACAGGCAACCACCCT  
TACAATGTGTTGATGACCAGGTATCTGGATGAAAAATTGGACTCCTCTGCAAACCAGCTGC  
CTCAGATTATAGGTTTAACTGCTTCTATTGGAGTTGGTAATGCCAAGAGCACTAATGAACT  
GTAGAGCACATCTGTACCCTCTGCTCCAACCTTGACATACAGACCATATCCACTGTCAGAG  
TGAACAAAGAAGATCTGCAGAGGTTTGGAAACAAGCCAGAAACACATATCAGATGGGTTAA  
AATGCGAGCTCAGAATCATTTTGCAGACATTATCTCAGGTCTGATGTCTGAGACGGAGATG  
TTGATGAGGAAGATTTATTACAGCGGATATCATCTCCCAAATCAACAAGAATTACTTTGGAAC  
ACAGAGATATGAACAGTGGATAGTTTCCACTCAGAAGAAATGCAGACTGTTGCAACTGGAA  
GATAAGGAGAAGGAGAGCAGTATTTGTAGAGAACTTTTCATTTGTAAGTGAACACTTGC  
AATTCAATGATGCTCTCATTATCAGTGAAGACGCTCGCATTGAAGATGCTTTAGCCTATCTA  
AATGAATTTTTCACAAATGTGAAAAATGGACCATATACAGAGTTAGAGAAGCAGCTGACGG  
AGAAATTTCAAGAGAAAGAGCTAGAGCTCACTGCTCTTTCAAAGATGAGTCAAATGAGAAT  
CCAAAGTTGGAAGAGCTCACTTGTATCCTGGACGAAGCATACCACTATAATCCAGAGACTC  
GCACTATTCTCTTTGCCAAGACAAGAGCCTTAGTAGCTGCTTTGAAGAAGTGGATAGAAGC  
AAACCCTGTACTTAGCCACATAAAGACAGATGTGTTGATGGGTAAGGGAAGAAGAGATCAT  
AAAACAGGTATGACCCTGCCAATGCAGAGGGATGTACTGGATGCATTGAGAAATGATAAAA  
ACATCAGACTGCTGATTGCTACATCTGTTGCTGACGAAGGCATTGATATTACTGAGTGCAA  
CCTTGTGGTGCTCTATGAATACTTCGGTAATGTCACCAAAATGATCCAAGTCAGAGGTCGT  
GGAAGGGCAAGAGACAGCAAGTGCATCCTTGTGACAAGCAAAACAGAAAGTGGTTGAGAAT  
GAAAACTAAACAGTTACAAGGAAGAAATGATGAATGCAGCTATTGAAAAGCTACAGAGCT  
GGGATGAAACAACGTTTGCAAGAAAGATACATGGCCTGCAAATGAAGGAAAAGATACTACG  
AGATTCCAGGAAGAAAGAAACAAAACATAAAGTAGTGGAAGGGAAGAAAAAACTCTTGTGT  
GGAAAATGCAAAGCGTATGTCTGCAGTACAGACGACATCAGAGTCATACAGGAATCTCATC  
ACACTGTCCTTGGTGATGCGTTCAAGGAGCGTTATATAACAAAGCCCCACCGGAAACCAGT  
TAAGTATGATGCTTTTGAGAAAAAATGCAAGATGCATTGCCGTAATACTCAATGCCAGCATG  
ACTGGGGGATCACAGTGAAGTACAAGATATTTGATAATCTACCAGTGATCAAAATCAAAAG  
CTTTGTACTAGAGGATGTTGAAACTGGGACACAAATGGATTTTCAGAAATGGAAAAACATTA  
ATTTTTCTTTGAAGAATTTTGATGAAGAAGCATCCAAGTGA

>passer\_montanus-rig1

ATGACGGCGGAGGAGAAGGGAAACCTGCGGTGCTACCGGCGCTACATCGAGAGGATCCT  
GAACCCCGTGATACATCCTCAGCAACATGACGGAGTGGCTGTCCGACGAGGTGAAGGAGC  
GAGTCCGAAAGGAGGAGGAGAGGGGCGTCACGGCGGCGCGCGCTGTTCTGGACGC  
CGTGCTGCTGCTGGAGGCGGAGGGCTGGCTCCGCGGCTTCCTGGATGCGCTGGTTGCAG  
CAGGTTACACTGGACTGGCAGAAGCAATTGAAAAGTGGGAYTTCAGCAAACTGGAAAACT  
GGAGCTGCACAGGCAGCTGTTGAAGCGGATAGAAGCAACAATGTTAGAAATTGATCCTGTA  
GCAATCATGCCATACATAAACACATGCCTGATAGAGAGGGAGTGTGATGAGATCCTGCAGA

TCAGTGAGTACAGAAGCAAAGCGGCCGGGATAACTAACTCATTGAATGCCTCTGTGCTC  
GGATAAGGAAAAGTGGCCCAAAGTCTTCAGCTGGCATTGGATAATGCAGGATATTACAAY  
GCAAGTGAACRTTGAATATAAGAGAAGATAATGGCAAAGATGTTGATGGTGAAATGACAG  
ATGCCTCTGAGAATTACTTTGAACTGTGATGACATTTTCTGAGGAAGCAGAATGTGACAAT  
CTGAGCAAAGTCTCTCTTCAGTTTCAGAAAGCATCTGTGAGTCTTCATCTGTTTATGAACC  
AATGAAGGCTCGAAGCTACCAGATTGAGCTTGCACAGCCTGCTATTGATGGGAAAAACACA  
TTGATTTGTGCACCTACAGGATCTGGAAAACTTTTGTGGCACTTCTGATTTGTGAACATCA  
TTTGCAMAACGTTCCCTCAGGACGAAAGGCTAAAGTTGTCTTCCTTGCAACCAAAGTGCCA  
GTGTATGAGCAGCAGAAAAATGTGTTCAAGGCAGCATTTTGAAAGAAGTGGATACTCTGTTC  
AAGGAATTTGTGGTGAAACAGTTGCAAATATCTCTGTAGAAAATGTTATACAGGACAGTGAC  
ATCATTGTGCTAACGCCCCAGATTCTTGTAATAGCATGGAGAAAGGGATCCTTAGCTCCC  
TCTCCATCTTCACTCTGATGATATTTGATGAGTGCCACAACACTACAGGCAACCATCCTTAC  
AATGTGTTGATGACCAGATACCTGGATCAAAAATTTGACTCCTCTGCAAACCAGCTGCCTC  
AGATTGTAGGTTTAACTGCTTCTGTTGGAGTTGGCAATGCCAAGAGCACTAAGGAACTGT  
AGAGCACATCTGTACCCTCTGCTCCTACCTTGACATACAGGCCATATCCACTGTCAGAGAG  
AACAAACAAGATCTGCAGAGGTTTGGAAACAAGCCAGAAACACATATCAGATGGGTAAAA  
TGCGAGCTCAGAATCACTTTGCAGACATTATCTCACGTCTGATGACTGAGACAGAGGTGTT  
GATGAGAAAGATTTACTCAGTGGATACCATCTCCCAAATCAACAAGAGTTACTTTGGAACAC  
AGAGATATGAACATTGGATAGTTTCCACTCAGAAGAAATGCAGACTATTGCAACTGGAAGA  
TAAGGAGAGGGAGAGCAGTATTTGTAGAGACCTTTTTCATTTGTACTGAACACTTGCGTAAAT  
TCAATGATGCTCTCATTATCAGTGAAGATGCCCCGcaTTGAAGATGCTTTAGCCTACCTAAAT  
GAATTTTTTACAAATGTAAAAAACGGACCATATACAGAGTTAGAGAAGCAGCTGACGGAGA  
AATTTCAAGAGAAaAGAACTAGAGCTGACTGCCCTTTCAAAGATGAGTCAAATGAGAATCCC  
AAGCTGGAAGAGCTTGCTTGCATCCTGGACGAAGCATACCACTATAACCCACAGACTCGCA  
CTATTCTCTTTGCCAAGACAAGAGCCTTAGTAGCTGCTTTGAAGAAGTGGATAGAAGGAAA  
CCCTCTTCTTAGCCACATAAAGCCAGATGTGTTGATGGGTAAAGGGAAGAAGAGATCAGAAA  
ACAGGTATGACCCTGCCAATGCAGAAGGGTGTACTGGACGCATTGAGAAATGACAAAGAC  
ATCAGACTGCTAATTGCTACTTCTGTTGCTGACGAAGGCATTGATATTAGTGAGTGCAACCT  
TGTGGTGCTCTATGAATACTTCGGTAATGTCACCAAAATGATCCAAGTCAGAGGTCGTGGA  
AGGGCAAGAGACAGCAAGTGCATCCTTGTGACAAGCAAAACAGAAGTGGTTGAGAATGAA  
AACTAAACATTTACAAGGAAGAAATGATGAATGCAGCYATTGAAAAGCTACAGAACTGGG  
ATGAAACAACATTTGCAAGAAAGATACGTGGCCTGCAAATGAAGGAGAAGATGCTACGAGA  
TTCCAGAAAGAATGAAACAAAACATGAAATAGTAGAAGGGAAGAAAAAACTTTTGTGTGGAA  
AATGCAAAGCATATGTCTGCAGTACAGATGACATCAGAATTATAAAGGAGGCTCATCACAC  
TGTCTTAGGTGATGCGTTCAAGGAGCGTTATACAACAAAGCCCCACAAGAAATTGATTCAG  
TTTGATGGTTTTTGAGAAAAAAGCAAGATGCATTGCCGAAATACTGAGTGCCAGCATGACT  
GGGGGATCATAGTGAAGTACAAGATATTTGATAATCTACCAGTGATCAAAATCAGAAGCTTT  
GTACTAGAGGATGTTGAACTGGGATGCAAATGGATTTTCCRAAATGGAAAAGTATTAATTT  
GTCTTTGAAGAATTTTGATGAAGAAACATGCAGCTGA

>patagioenas\_fasciata-rig1

ATGACCGCGGAGGAGAAGAGGAGCCTGCAGTGCTACAGGCGGTACATCGAGAGGAGCCT  
GAACCCCGTCTACATCCTGAGCAACATGACGGACTGGCTGTCGGACGAGATGAAGGAGAG  
AGTCCGGAAGGAGGAGGAGAAGGGGGTGACGGCGGCCGCCGCGCTGTTTCTGGACACC  
ATCCTGCAGCTGGAGGCGGAGGGCTGGCTCCGGGGCTTTTTGGACGCCCTGTTGACAGC

AGGTTACACTGGGCTAGCAGAAGCAATTGAAAAGCTGGGACTTCAGCAAAGCTGGAAAACTG  
GAGTTGTACAGGCAGCTGTTGAAGCGGATAGAAGCAACAATGCTGGAAGTTGATCCAGTA  
GCACTCATGCCCTACATTAACAGCTGCCTGATAGAAAGGGAGTGTGATGAGATCCTGCAGA  
TTAGTGAATACAGAAGCAAAGCAGCTGGGATAACTAACTCATTGAATGCCTCTGTGATC  
GGACAAGGAAAACTGGCCGAAAAGCCTTCAGCTGGCACTAGATAACACAGGATACTACAAT  
GCAAGTGAAGTGTGGGGCATTAGAGAAGATCGTGGCAAAGATGTTGATGGTGAATGGCA  
GATGCCTCTGAAAGCAGCTTTGAAATCACGATGACGTTTTCTGAAGAAGCAGAACGTGACA  
ATAATCTCAGTGAAAATCTCTGTTGAGCTTCAGGGACCTATCAGTCTTTACCTGTTTATGAA  
CCAAGGAAGGCTCAGAGCTACCAGACTGAACTTGACAGCCTGCTATCAATGGGAAGAAC  
ACATTGATATGTGCTCCACAGGATCTGGAAGAACTTTTGTGGCAATTCTGATTTGTGAACA  
CCATTTCCAAAACATGCCCGCAGGACGAAAGGCGAAAGTTGTCTTTCTTGCAACTAAAGTG  
CCAGTGTATGAACAACAGAAAAATGTGTTCAAACAGCATTGTTGAAGAAGTGGATATTCTGT  
TCAAGGAATTTGTGGTGAAATAGTTGCAATGTCTCTGTAGAAAAGGTTATACAGGACAGT  
GACATCATTGTGCTAACACCTCAGATTCTTGTAATACCATAAAGAAAGGAACCTTAGCTC  
CCTCTCCATCTTCACTCTGATGATATTTGATGAATGCCACAACACTACGGGCAACCACTCT  
ACAATGTGTTAATGGCCAAATACCTGGAACAAAAATTTGACTCCTCTGCAAACCAGCTGCC  
CCAGATTGTAGGTTTAACTGCTTCTGTTGGAGTTGGTAATGCCAAGGACACCACTGAAGCT  
GTAGAGCACATCTGTACCCTCTGCTCCTACCTTGACATACAGGCCATTTCCACTGTCAGAG  
AGAACAAAGAGGATCTGCAGCGATTTCATAACAAACCAGAAACAGATGTCAGACAGGTTAA  
AATGCGACTTCAGAATCACTTTGCAGACATTATTTGAGATCTCATGTCTGAGATACAGGCAA  
CGATGAGGAAGATCTACTCACTGGATGCTATCTCTCAAATGAACAAGACTGATTTTGGAAAC  
ACAGAAATATGAACAGTGGATAGTTACCACACAGAAGAAATACAGACTGTTGCAACTGGCA  
GACAAGGAGAAGGAGAGCAGCATTTGCAGAGACATTTTCATCTGCACTGAGCACCTGCGT  
AAATTCATGATGCTCTCATCATCAGTGAAGATGCCCCTATTGAAGACGCTTTAGCCTACCT  
AACTGAATTTTTTCACAAATGTCAAAAACGGACCATTTACAGAATTAGAGAAGCAGCTGACAG  
CCAGATTTCAAGAGAAAGAACCAGAACTGACTGCCCTTTCAAAGATGAATCAAATGAGAA  
TCCCAAGCTGGAAGAGCTTGCTAGCATCCTGGATGAAGCATACCACTACAACCCACAGACT  
CGCACTCTTCTCTTTGTTAAGACAAGAGCCTTAGTAGCTGCTTTGAAGAAGTGGATGAAAG  
CAAACCTCTGCTTAGCCACATAAAGCCAGATGTGTTGATGGGTCATGGAGGAAGAGGTC  
ACAAAACAGGTATGACACTCCCAATGCAGAAGGCTGCACTGGATGCATTCAAACCGACCA  
GGACTGCAGACTGCTAATTGCTACATCTGTTGCTGATGAAGGCATCGATATTTCTGAGTGC  
AACCTTGTTGTGCTCTATGAATACGACGGTAACCTCACCAAAATGATCCAAGTCAGAGGTC  
GTGGAAGGGCAAGAGACAGCAAGTGCATCCTTGACAAAGCAAAGCAGAAGTGGTTGAGA  
ATGAGAAATATAACTGCTATAAAGAAGAAATGATGAACGAAGCTATTGAAAACCTACAGAAT  
TTGGATGAAACAACATTCACAAGAAAGATACAAGACCTGCAAAAGAAGGAAAATGTATTAC  
GAGATTCCAGGAAGAAAGAAACAATACCTAAGGGACTGGAAGGGGAAAAAAATCTTCTCTG  
TGGAAAATGCAAAGCATATGCCTGCAGTACAGATGACATCAGAGTTATAAAGGAATCTCAT  
CACACTGTCATAGAAGATGCGTTCAAGGAGCGTTATATGACAAAGCCCCACAAGAAACAG  
TCCGGTTTGATTGTTTTGAGAAAAGGAGCAAGATGCACTGCCAAAATGCTGATTGCCAGCA  
TGACTGGGGAATCACAGTGAAGTACAAGACATTTGACAATCTACCAGTGATCAAATCAAA  
AGCTTTGTAGTAGAGGATGTTGAAACCAGGACACAAATGGATTTTCAGAAATGGAAGTTAT  
TAATCTCTCTTTGAAGAATTTTGATGATGAAGAAACGTCCAGCTAA

>penelope\_pileata-rig1

ATGACGGCGGAGGAGAAGCAGAGCCTGCGCTGCTACCGGCAGTACATCGAGAGGATCCT

GAACCCCGTGCTACGTGCTGGGCAACATGGTGGACTGGCTGTCCGACGAGCTGCGGGAGA  
GGATCCGGAGGGAGGAGGAGAAGGGAGTGAGCGGGGCCGCAAGCTGTTCTTGACAC  
CGTACTGCTGCTGGAGGACCGGGGCTGGTTCCGCGGGATGCTGGACGCCATGGCGGCC  
GCAGGTTACACAGGGCTGACAGAAGCAATTGAGAACTGGGACTTCAGCAAGCTGGCAAAA  
CTGGAGAGACCCAGAGAGCTGTTGAAGCGGATAGAAGCAACGATGCTAGAGGTCGACCCA  
GTAGTGCTCATGCCCTACATAAACAGCTGCCTGATAGACAGGGAGTGTGAAGAGATTGAG  
CAGATTAGTGAAAACAGAAGCAGAGCAGCTGGCATAACGAGACTCATTGAATGTCTCTGTC  
GGTCGGATAAGGAACACTGGCCAAAAAGCCTTCAGCTGGCTCTTGATAACACAGGATATTA  
CCATGCAAGCGAAATGTGGGATATGAGAGAAGATAATAGCAATGGCATTGACAATGAAATG  
ACAGATGTCTCCGAGGACAGCCTCGTCACTGTGACATATTCTGAAGAAGCAGAATATGATA  
ATAATCTCCATGAAAATCTCAGTTCCACTCCAGAACGGATGGTTGAGTCTCTACCTGTTTAT  
AAACCAAAGGAGGTTCCGAGCTACCAGCTTGAACCTGCACAGCCTGCTATCAACGGGAAG  
AATACCTTAATATGTGCTCCTACTGGATCTGGAAAAACGCTTGTGGCTCTTCTGATTTGTGA  
ACACCATTTCCAAAACATGCCTGCAGGTCGAAAGGCGAAAGTTGTCTTTCTTGCAACTAAA  
GTCCCAGTGTATGAACAACAGAGAAATGTCTTCAAGCAGCACTTTGAAAGACTTGGATATT  
CCATTCAAGGAATTAGTGGTGAAATGGTTGCAAATGTCTGTGTGGAAAATGTTATACAGGA  
CAGCGACATCATCGTAATGACTCCCCAGATCCTGTTGAATAGCTTCGAGAAAGGGACCCTT  
ACCTCCCTCTCCATGTTCACTCTGATGATTTTTCGATGAATGCCACAACACTACAGGCAACCA  
CCCTTACAATATGTTAATGGTCAGATATCTGGAGCAGAAATTTGACTCCCCTGCAAGTCAG  
CTCCCACAGATTATAGGTTTGACTGCTTCTGTTGGAGTTGGTAGTGCCAGGAACACTGAGG  
AAACAGTGGAGCACATCTGCAGTCTGTGTTCTACCTTGACATACAGGCTGTATCCACTGT  
CAGAGAGAACTTAGAGGATCTGCAGAGGTTGGTGTACAGGCCAGAAACAGATGTCAGACT  
GGTTAGGATGCGACTTCACAATAAATTTGCAGTCATTGTCTCAGATTTGATGTCCGAGACA  
GAGGCACTGATGAGGCAGATTTATTAGTAGATACCATCTCCCCAAATAACAAGAAAGATTT  
TGGAACACAGAAGTACGAACACTGGATAATTGCCACTCAGAGGAGAGGCAAACCTTTTGAG  
CTGAAAGACAAGGAGAAGGAGAGTAGGATGTGCAGAGCCCTTTTCATTTGCACTGAGCAT  
CTGCGGAAATTCAATGATGCCCTCATCATCAGTGAAGATGCCCGCATCCAAGATGCTTTAT  
CTTACCTGACCGAGTTTTTCAAAATGTCAAAAATGGACCATTACAGAATTAGAGCAGTAC  
CTGACAGACAAATTTCAAGAGAAAGAACCAGATCTGGTTGCCCTTTCAAAAGATGAATCAAA  
TGAGAATCCTAAGCTGGAGGAGCTTGCCAGCATCCTGGACGACGCGTACCGCTATAACCC  
ACAGACTCGCACTCTCCTCTTCGCTAAGACAAGAGCCTTAGTAGCCGCTTTGAAGAACTGG  
ATGGATGAAAATCCGCTACTTAGCTACATAAAGCCAGATATTTTGATGGGGCGTGCAAGAA  
GAGCTCAAAAAACAGGTATGACCCTCCCAGGCCAGAAAGTCGTAAGTGGATGCGTTCAAAA  
CCGACTCAGACAGCAGACTGCTAATTGCTACATCTGTTGCTGATGAAGGCATTGATATTGC  
CCAGTGCAACCTTGTTGTGCTCTATGAATACTTTGGTAACGTCACCAAGATGATCCAAGTCA  
GAGGTCGTGGAAGGGCAACAGGCAGCAAGTGTATCCTTGTGACAAGCAAACAAGAAGTGG  
TTGAGAATGAGAAAAACAACCGTTATAAGGAAGAAATGATGAATAAAGCTATTGAAGAGCTC  
CAAAAATGGGACGAAGCAACATTTGCAAGGAAGATATATAGCCTGCAAATGAAGGAAAAGG  
TGTTACGAGATTCCAAGAAGAGGGAAATAAGACCTAAGCTAGTGCAAGGCAAATGAATCT  
ACTGTGTGGAATAATGCAAAACATACGCCTGCAGTACAGACGACATCAGAGTTATAAAGGAA  
TCTCATCACACTGTCCTAGGAGAAGCATTCAAGGAGCGTTATATAACAAAGCCTCATAAGA  
AACCATTCCAATATGATGGTTTTGAGAAAAAAGCAAGATGTATTGCCGAAATAGCAATTGC  
CAGCATGACTGGGGAATCACAGTGACATACATGACATTTGACAATCTACCAGTGATCAAAA  
TCAAAAGCTTTGTGGTGGAGAATGTTGCAACTGGGACGCAAATGGACTTTCCAAAATGGAA

AAGTATTAATTTTTCTTTGAAGAATTTTGATGTCTGAAGAAATGCCCAACTGA

>phalacrocorax\_pelagicus-rig1

ATGACGGCGGAGGAGAAGCGGAGCCTGCGGTGCTACCGGCGGTACATCGAGAAGAGCCT  
GAACCCTGTCTACGTCCTGAGCAACATGACGCCCTGGCTGTCCGACGAGGTGAAGGAGAG  
AGTCCGTAAGGAGGAGGAGAAGGGGGTGACGGCGGCCGCCGCGCTGTTCTTGATGCC  
ATCCTGCAGCTGGAGGCGGAGGGCTGGCTGCGGGGCTTCCTGGACTCCCTGGCTGCAGC  
AGGTTATACTGGACTGGCAGAAGCAATTGAAAACCTGGGACTTCAGCAAACCTGGAAAACTG  
GAATTGCACAGACAGCTGTTGAAGCGGATAGAAGCAACAATGCTAGAAGTTGATCCAGTAG  
CACTCATGCCCTACATAAACACATGCCTGATAGAAAGGGAGTGTGAAGAGATCCTGCAGCT  
TTGTGAATACAGAAGCAAAGCAGCTGGGATAACTAACTCATTGAATGCCTCTGTGATCG  
GATAAGGAAAACTGGCCGAAAAGCCTTCAGCTGGCACTAGATACCACAGGATATTACAATG  
CAAGTGAGCTGTGGGATATGAGAGAAGATAATGGCAAAGATGTTGATGGTGAAATGACAGA  
TGCCTTTGAGAACAGCTTTGAAACCATGATGACATTTTCTGAAGAAGCAGAATTTGATAATA  
ATCTCAGTGAAAATCTCTGTTTCAGCTTCAGAAGGGATCTATGAGTCTTCACACGTTTGTGAA  
CCAAAGAAGGCTCGGAGCTACCAGATTGAACCTGCACAGCCTGCTATCAATGGGAAAAACA  
CATTGATATGTGCCCCAACAGGATCTGGAAAACTATTGTGGCACTTACGATTTGTGAACA  
CCATTTGAAAACATGCCACAGGAAGAAAGGCAAAAGTTGTCTTTCTTGCAACTAAAGTG  
CCAGTGACGAACAACAAAAAATTTATTCAAGCAGCATTTTGAAAGAAATGGATATTCTGT  
TCAAGGACTTAGTGGTGATACCGTTGCAAATGTCTCTGTAGAAAAGGTTATACAGGACAGT  
GACATCATTGTACTGACACCCCAGATTCTTGTGAATAGCATCAAGCAGCGGATCCTTAGCT  
CCCTCTCCATCTTCACTCTGATGATATTTGATGAGTGCCACAATACCATGGGCAACCACCC  
TTACAATGTGTTGATGACCACATACCTGGAAGAAAAATTTGACTCCCCTGCAAAGCAGCTG  
CCTCAGATTGTAGGTTTAACTGCATCTGTTGGAGTAGGTAATGCCACGACCATCATGGAAA  
CAATAGAGCACATCTGTACCATTTGCTCCTACCTTGACATACAGACCATATCCACTGTCAGA  
GAGAACAACAGGATCTGCAGAGATTCGGAAACAAGCCAGAAACATCTGTCAGACAGGTTA  
AAATGCGAGTTCAAAATCACTTTGCAGACATTATCTCAGGTCTGATGTCTGAGACAGAGGC  
GTTGATGAGGAAGATTTACTCAGTGGATACTATGTCTCAAATCAGCAAGAAAGATTTTGGAA  
CACAGAAATATGAACACTGGATAGTTTTCACTCAGAAGAAATGCAAACCTGTTGCAACTGGC  
AGATAAGGAGAAGGAAAGCAGTATTTGTAGAGACCTTTTCATTTGCACTGAACACCTGCGG  
AAATTCAACGATGCTCTCATTATTAGTGAAGACGCCCGCATCGAAGATGCTGTAGCCTACC  
TAACTGAATTTTTACAAATGTCAAAAATGGACCGTATACAGAGTTAGAGAAGCGACTGACA  
GCCAACTTTCAAGAGAAAGAACCAGAAATGACTGCCCTTTCAAAGATGAATCAAATGAGA  
ATCCCAAGCTGGAAGAGCTTGCTTGCATCCTGGATGAAGCATACCGCTATAACCCACAGAC  
TCGCACTCTTCTCTTTGCTAAGACAAGAGCCTTAGTAGCTGCTTTGAAGAAGTGATAGAA  
GCAAACCCTCTACTTAGCCACATAAAGCCAGAAGTGTTGATGGGTCTGTGGAAGAAGAGATC  
AAAAACAGGTATGACCCTCCAATGCAGAAGGGTGTGCTGGATGCATTCAAACCAACAA  
AGAGAGCAAACCTGCTAATTGCTACATCTGTTGCTGATGAAGGCATTGATATTTCTGAGTGCA  
ACCTTGTCGTACTCTATGAATACTTCGGTAATGTCACCAAAATGATCCAAGTCAGAGGTCGT  
GGAAGGGCAAAAAACAGCAAGTGCATCCTTGTGACAAGCAAAGCAGAAGTGTTGAGTAT  
GAGAAACACAACCGTTATAAGGAAGAAATGATGAATGAAGCTATTGAAAAGCTACAGAATT  
GGGATGAAACAACATTTGCAAGAAAGATATGTGACCTGCAAATGAAAGAAAAGGCATTACG  
AGATTCCAGGAAGAAAGATACAAGACCTAAGTTAGTGGAAGGGAAACAAAATCTTCTGTGT  
GGAAAATGCAAAGCATATGCCTGCAGTACAGATGACATCAGAGTTATACAGGAATCTCATC  
ACACTGTCATAGGAGATGCATTCAAGGAGCGTTATATAACAAAGCCTCACCAGAAACCCAT

TCAGTATGATAGTTTCGTGAAAAAAAAACAAGATGTATTGCCAAAATACTAATTGTCAGCATG  
ACTGGGGAATCACAGTGAAGTACAAGATGTTTGATAATCTACCAGTGATCAAATCAAAG  
CTTTGTACTAGAGAATGTTGAACTGGGACACAAATGGAGTTTCAGAAATGGAGAGATATTA  
ATTTTTCTTTGAAGAATTTTGATGTTGAAGAAACACCCAGCTGA

>phoenicopterus\_ruber-rig1

ATGACCGCGGAGGAGAAGAGGAACCTGCAATGCTACAGGCGGTACATCGAGAAGAGCCT  
GAACCCCGTCTACATCCTGAGCAACATGACGGACTGGCTGCCCCGACGAGGTGAAGGAGA  
GAGTCCGGAAGGAGGAGGAGAAGGGCGTGACGGCGGCCGCCGCGCTGTTTCTGGACGC  
CATCCTGCAGGTGGAGGCGGAGGGCTGGCTCCGGGGCTTCCTGGACGCCCTGTTTGCAG  
CAGGTTAACTGGTCTGGCAGAAGCAATTGAAACTGGGACTTCAGCAAATGGAAAACT  
GGAGCTGCACAGACAGCTGTTGAAGCGGATAGAAGCAACAATGCTTGAAATTGATCCGGT  
AGCGCTCATGCCTTACATAAACACATGCCTGATAGAGAGGGAATGTGATGAGATCCTGCAG  
ATTAGTGAATACAGAAGCAAAGCAGCTGGGATAACTAACTCATTGAATGTCTCTGTCGATC  
GGATAAGGAAAACTGGCCGAAAAGCCTTCAGCTGGCACTAGATAACACAGGATATTACAAT  
GCAAGTGAAGTGTGGGATATGAGAGAAGATAATGGCAAAGATGTTGATGGTGAAATGACAG  
ATGCCTCTGAGAACAGCTTTGAAACCATAGTGACATTTTCTGAAGAAGCAGAATATGATAAT  
AATCTCAGCGAAAATCTCTGTTCACTTCAGAAGGGGTCTGTCAGTCTTCACCTGTTTATGA  
ACCAAAGAAGGCTCGGAGCTACCAGACTGAACTTGCACAGCCTGCTATCAACGGGAAAAA  
CACATTGATATGTGCCCCCACAGGATCTGGAAAACTTTTGTGGCACTTCTGATTTGTGAAC  
ACCATTTCCAAAACATGCCTGCAGGACGAAAGGCAAAAGTTGTCTTTCTTGCAACTAAAGT  
GCCAGTGTATGAACAACAGAAAAATGTATTCAAGCAGCATTTTGAAGAAGTGGATATTCTG  
TTGAAGGAGTAAGTGGTGAAACAGTTGCAATGTCTCTGTAGAAAAGGTTATACAGGACAG  
TGACATCATTGTGCTGACGCCCCAGATTCTTGTAATACCATTGAGGAAGGGATCCTTAGC  
TCCCTCTCCATCTTCACTCTGATGATATTTGATGAGTGCCACAACACTACGGGCAACCACC  
CTTACAATGTGTTAATGACCACATACCTGGAACAAAATTTGGCTCCTCTGCAAAACAAGT  
CCTCAGATTGTAGGTTTAACTGCTTCTGTTGGAGTTGGTAATGCCAAGACCACCAAGGAAA  
CAATAGAGCACATCTGTACCCTCTGCTCCTACCTTGACATACAGGCCATATCCACTGTCAG  
AGAGAACAAACAGGAGCTGCAGAGATTTGGAACAAGCCAGAAACACATGTCAGATGGGT  
TAAAAGGCGGGTTCAGAATCACTTTGCAGACATTATCTCAGGTCTGATGTCTGAAACAGAG  
GCGTTGATGAGGAAGATTTACTCAGTGGATACTATCTCTCAAATCAAGAAGAATGATTTTGG  
AACACAGCAATATGAACACTGGATAGTTGCCACTCAGAAGAAATGCAGACTGTTGCAACTG  
GCAGATAAGGAGAAGGAGAGCAGTATTTGCAGAAACCTTTTCATTTGCACTGAACACCTGC  
GGAAATTCAACGATGCTCTCATCATCAGCGAAGATGCCCGCATCGAAGATGCTTTAGCCTA  
CCTAACTGAATTTTTCACAAATGTCAAAAATGGACCATATACAGAGTTAGAGAAGAACTCA  
CAGCCAAATTTCAAGAGAAAGAACCAGAACTGACTGCCCTTTCAAAGATGAATCAAATGA  
GAATCCCAAGCTGGAAGAGCTTGCTTGATCCTGGATGAAGCATACCGCTATAATCCACAG  
ACTCGCACTCTCCTCTTTGCGAAGACAAGAGCCTTAGTAGCTGCTTTGAAGAAGTGGGTAG  
AAGCAAACCTCTACTTAGCCACATAAAGCCAGATGTGTTGATGGGTCGTGGAAGAAGAGA  
TCAAAAAACAAGTATGACCCTCCAATGCAGAAGGGTGTACTGGATGCATTCAAACCAAC  
AAAGAGAGCAGACTGCTAATTGCTACATCTGTTGCTGACGAAGGCATTGATATTTCTGAGT  
GCAACCTTGTTGTGCTTTATGAATACTTCGGAAATGTCACCAAAATGATCCAAGTCAGAGGT  
CGTGGAAGGGCAAAAGACAGCAAGTGCATCCTTGTGACAAGCAAAACAGAAGTGGTTGAG  
AATGAGAAACATAGCCGTTACAAGGAAGAAATGATGAATGAAGCTATTGAAGAGCTACAGA  
ATTGGGATGAAACAACATTTGCACGAAAGATACATGACCTGCAAATGAAGGAAAAGGCATT

ACGAGATTCCAAGAAGAAAGAACCAAGACCTAAGGTAGTGGAAGGGAAAAAAATCTTCTG  
TGTGGAAAATGCAAAGCATATGCCTGCAGTACAGATGACATCAGACTTATAAAGGAATCTC  
ATCACACTGTCTAGGAGATGCGTTCAAGGCACGGTATATAACAAAGCCTCACCGCAAACC  
AATCCAGTTTGATGGTTTTGAGAAAAAAGCAAGATGCATTGCCAAAATACTAATTGCCAGC  
ATGACTGGGGAATCACCGTGAAGTACAAGACATTTGATAATCTACCAGTGATCAAAATCAAA  
AGCTTTGTAGTCGAGAACGTTGAAACTGGGACACAAATGGATTTTCAGAAATGGAAAAATAT  
TAATTTTTCTTTGAAGAATTTTGATGTTGAAGAAACGTCCAGCTGA

>phylloscopus\_trochilus-rig1

ATGACGGCGGAGGAGAAGCGGAACCTGCGGTGCTACAGGCGCTACATCGAGAGGAGCCT  
GAACCCCGTGATACCTCAGCAACATGACGGACTGGCTGTCCGACGAGGTGAAGGAGAG  
AGTCCGAAAGGAGGAGGAGAAGGGGGTGACGGCGGCCGCCGCGCTGTTCTTGATGCC  
GTGCTACTGCTGGAGGCGGAGGGCTGGCTCCGGGGCTTCCTGGATGCTCTGGTTGCAGC  
AGGTTACACTGGACTGGCAGAAGCAATTGAAAAGTGGACTTCAGCAAAGTGGAAAACTG  
GAGCTGCACAGGCAGCTGTTGAAGCGGATAGAAGCAACAATGCTAGAAATTGATCCTGTA  
GCAATCATGCCGTACATAAACACATGCCTGATAGAGAGGGAGTGTGATGAGATCCTGCAG  
ATCAGTGAATACAGAAGCAAAGCAGCTGGGATAACTAACTCATTGAATGCCTCTGTGCGCT  
CAGATAAGGAAAACTGGCCCCAAAAGTCTTCAGCTGGCATTGGATAATGCAGGATATTACAA  
TGCAAGTGAAGTGTGGAATATAAGAGAAGATAATGGCAAAGATGTTGATGGTGAATGACT  
GACGCCTCAGAGAATCACTTTGAAACCATGATGACATTTTCTGAAGAAGCAGAATGTGATA  
ATCTCAGTGAAAATCTCTCTCCAGAAAGCGTCTATGAGTCTTCATCTGTTTATGAACCAAAG  
AAGGCTCGGAGTTACCAGATTGAGCTTGACAGCCTGCTGTTGATGGGAAAAACACATTGA  
TTTGTGCCCCCACAGGATCTGGAAAACTTTTGTGGCACTTCTGATTTGTGAACATCATTGT  
CAAAACGTTCCCTCAGGACGAAAGGCCAAAAGTTGTCTTCCTTGCAACCAAAGTGCCAGTGT  
ATGAGCAACAGAAAAATATATTCAGGCAGCATTTTGAAGAAGTGGATACTCTGTTCAAGGA  
ATTTGTGGTGAAACAGTTGCAAATATCGCTGTAGAAAATGTTATACAGGACAGTGACATCAT  
CATGCTAACGCCCCAGATTCTTGTAATTGCATGGAGAAAGGCATCCTTAGCTCCCTCTCC  
ATCTTCACTCTGATGATATTTGATGAGTGCCACAACACTACAGGCAACCACCCTTACAATGT  
GTTGATGGCCAGATACCTGGATCAAAAATTTGACTCCTCTTCAGACCAGCTGCCTCAGATT  
GTAGGTTTAACTGCTTCTGTTGGAGTTGGTAATGCCAAGAGCACTAATGAAGCTGTAGAGC  
ACATCTGTACCCTCTGCTCCTACCTTGACATACAGGCCATATCCACTGTCAGAGAGAACAA  
ACAAGATCTGCAGAGGTTTGGAAACAAGCCAGAAACACATATCAGATGGGTAAAATGCGA  
GCTCAGAATCACTTTGCAGACATCATCTCATGTCTAATGTCTGAAACAGAGGTCTTGATGAA  
GAAGACTTACTCAGTGGATACCATCTCCCAAATCAACAAGAATTACTTTGGAACACAGAGAT  
AtGAACACTGGATAGTTGCCACTCAGAGGAAATGCAGACTGTTGCAACTGGAAGATAAGGA  
GAAGGAGAGCAATATTTGTAGAGACATTTTCATTTGTACTGAACATTTGCGGAAATTCAACG  
ATGCTCTCATTATCAGTGAAGATGCCCGCATTGAAGATGCTTTAGCCTACCTAAATGAATTT  
TTCACAAATGTGAAAAATGGACCATATACAGAGTTAGAGAAGCAATTGACGGAGAAATTTCA  
AGAGAAGGAACAAGAACTGACTGCCCTTTCAAAGATGAGTCAAATGAGAATCCAAAGTTG  
GAAGAGCTCACCTGCATCCTGGATGAAGCGTACCGCTATAACCCACAGACTCGCACTATC  
CTCTTTGCCAAGACAAGAGCCTTAGTAAGTCTTTGAAGAAGTGGATAGAAGCAAACCTG  
TACTTAGCCACATAAAGACAGATGTGTTGATGGGTAAGGGAAGAAAAGATCATAAAACAGG  
TATGACCCTGCCAATGCAGAAGGGTGTACTGGATGCATTTAGAAATGACAAAGACATCAGA  
CTGCTAATTGCTACATCTGTTGCTGATGAAGGCATTGATATTACTGAGTGCAACCTTGTGGT  
GCTCTATGAGTACTTCGGTAATGTCACCAAAATGATCCAAGTCAGAGGTCGTGGAAGGGCA



AAAGACAGCAAGTGCATTCTTGTGACAAGCAAAACAGAAGTGGTTGAGAATGAAAACTGA  
ACAGTTACCAGGAAGAAATGATGAATGAAGCTATCAAAAAGCTACAGAACTGGGATGAAAC  
AACATTTGCAAAAACGATACATCGGCTGCAAATGAAGGAAAAGATACAACGAGATTCCAGG  
AAGAAAGAAACAAAACATGAAGTAGTGGAAGGGAAAAAAATCTTTTGTGTGGAAAATGCA  
AAGCATATGTCTGCAGTACAGATGACATCAGAGTTATAAAGGAATCTCATCACACTGTCCTT  
GGTGATGCGTTCAAGGAGCGTTATATAACAAAGCCCCACAGGAAAACAATTCAGTTTGTATG  
GTTTTGAGAAAAAAAGCAAGATGCATTGCCGAAATACTGACTGCCAGCATGACTGGGGGAT  
CACAGTGAAGTACAAGACATTTGATAATCTACCAGTGATCAAAATCAGAAGCTTTGTACTAG  
AGAATGTTGAAACTGGGACACAAATGGATTTTCAGAAATGGAAAAGTATTAATTTTTCTTTG  
AAAAATTTTGATGAAGAAACATCCACCTGA

>picoides\_pubescens-rig1

ATGACCGCGGAGGAGAAGAGGAGCCTGCAGTGCTACAGGCGGTACATCGAGAAGAGCCT  
GAATCCCGTCTACATCCTGAGCAACATGACGGACTGGCTGTCGGATGAGGTGAAGGAGAG  
AGTCCGGAAGGAGGAGGAGAAGGGAGTGACAGCTGCTGCTGCGATGTTCTTGGATGTCA  
TCTTGAGCTGGAGGAGGAGCGATGGCTCCGGGGCTTCATAGACGCCCTGGTGGCAGCA  
GGTTACACTGGGCTGGCAGAAGCCATTGAAAACCTGGGACTTCAGCAAACCTGGAAAACTG  
GAGCTGCACAGGGAGCTGCTGAAGAGGATAGAAGCCACAATGCTAGAAGTCGACCCAGTG  
ATGGTCATGCCTTACATAAACACATGCTTGATAGAAAGGGAGTGTGATGAGATCCTGCAGA  
TCAGTGAGTACAGGAGCAAAGCAGCCGGGATAACGAAGCTCATTGAGTGTCTCTGCCGCT  
CGGACAAAGAAAACCTGGCCCAAGAGCCTCCAGCTGGCACTGGACAATGCAGGCTATTACA  
ATGCAAGTGAGCTGTGGGATATGAGAGAAGAGAATTTCAAGGATTTTGATGGTGAAGTGGG  
GGATGCCTCTGAGAACAGCTTTGAAGCCATGGTGACGTTTTCTGAAGAAGTGGAATGTGAT  
AATTTCAGTGAAAATCTCTCTTCAGCTTCAGGAGGGACTAATGAGCCTCCAGCTGTGTATG  
AGGCAAAGGAAGCTCGGAGCTACCAGATTGAACTTGACAGCCTGCAATCAACGGGAAAA  
ATACCCTGATATGTGCTCCACAGGATCTGGAAAAACCTTTGTGGCCCTTCTGATCTGTGA  
ACACCACCTGCAAAACGTGCCCCCGGGACGGAAGGCGAAAATCGTCTTCTGGCAACCAA  
AGTGCCAGTGTATGAGCAGCAGCAAAATGTGTTCAAGGCAGCATTGTTGAAAGGCAGGGGTA  
CTCTGTTTCGAGGGATCTGCGGTGAGACAGTTGCCAACATCCCTGTAGAAAACGTGATCGA  
GGACAGCGACGTCATCGTGCTGACGCCCCAGATTCTGGTCAACTGCTTCAAGCAAGGCAT  
CCTCACCTCCCTCTCTGTCTTCACCCTGATGATATTTGATGAGTGCCACAACACCACGGGC  
AACCACCCTTACAATGTGTTAATGACCAGATACCTGGAGCAAAAATTTGCCTCCTCTGCAA  
GCCAGCTGCCCCAGATTGTAGGTTTAACTGCTTCTGTTGGAGTTGGTAATGCCAAGAGCAT  
CAAGGAAGCAATAGAGCACATCTGTACCCTCTGCTGCTACCTTGACATACAGACCATATCC  
ACTGTCAGAGAGAAACAAAGAGGATCTGCAGAGGTTTGGAACCATGCCAGAAACACATGTC  
AGGTGGGTTAAAAAGCGAGCTCAGAATCGCTTTGCAGACATCGTCTCAGGTCTGATGTCTG  
AGACAGAGGCGCTGATGAGGAGGATTTACTCAGTGGATACTATCTCCCAAATCAACAAGAA  
TGATTTTGAACACAGAGTTATGAGCAGTGGATAGTCACCACGCAGAAGAAATGCAGGCTG  
CTGCAGCTGCCAGATAAGGAGAAGGAGAGCAGTGTCTGCAGAGACCTCTTCATCTGCACT  
GAACACCTGCGTAAGTTCAACGACGCCCTCATGATCGGTGAAGACGCTCGCATTGAGGAC  
GCTCTGGCCTACCTGACTGAGTTTTTCACAAATGTCAGGAATGGACCCTACACACAGCTGG  
AGAAGAGACTCACAGCCAGGTTTCAAGAGAAAGAGGCAGAACTGACTGCCCTTTCAAAAG  
ATGAAACCAGTGAGAACCCCAAGCTGGAAGAGCTTGCTTGCATCCTGGATGAAGCATACC  
GCTACAACCTCAGACACTCGCACTCTAATCTTTGCCAAGACAAGAGCCTTAGTAGCTGCTTT  
GAAGAAGTGGATAGAGGCAAACCCTCTGCTGAGCCATGTAAAGCCAGGTGTGTTGATGGG

TCATGGAAGAAGAGACCAAAAAACAGGTATGACCCTCCCAATGCAGAAGGTGATACTGGAT  
GCATTCAGAACCAACAAGGACTGCAGACTGCTGATTGCTACATCTGTTGCTGATGAAGGCA  
TTGACATTTCTGAGTGCAACCTCGTTGTGCTCTATGAGTACTTTGGCAATGTCACCAAAATG  
ATCCAAGTCAGAGGTCGTGGAAGGGCAAGGAACAGCAAATGCATCCTTGTGACAAGCAAA  
ACAGAAGTGGTTGAGAATGAGAAACACAACCATTACAAGGAAGAAATGATGAATGAAGCTG  
TTGAGCAGCTGCAGAACTGGGATGAAGCAGCATTGCAAGGAAGATACATGTCCTGCAAAT  
GAAGGAGAAGGTGTTACGAGACTTCAAGAAGAAAGAAACAAGACCTCAGCTAGTGGAAGG  
GAAAAAAATCTCCTGTGTGGAAAGTGCAAAGCTTATGCCTGCAGTACAGATGATATCAGA  
GTTATAAAGGTATCTCATCACACTGTCCTGGGAGATGCATTCAGGGAGCGTTATGTAACAA  
AGCCCCACCACAAACCAATGAAGTTTGACTGTTTTGAGAAGAAAAGCAAGATGCACTGCAA  
AAACAGCAACTGCCACCACGACTGGGGCATCACAGTGAAGTACAAGATGTATGACAACCT  
GCCTGTGATCAAAATCAAGAGCTTTGTCGTGGAGAACGTTGAGACTGGGAGACAAATGGA  
CTTCCAGAAGTGGAAGAACATCAATTTTTCTCTGAAGAACTTTGATGATGAAGAAATGTCCA  
TCTGA

>pipra\_filicauda-rig1

ATGACGGCGGAGGAGAAGAGAAACCTGCGGTGCTACAGGCGGTACATCGAGAGGATCCT  
GAACCCCGTCTACATCCTCAGCAACATGACGGACTGGATGTCGGACGAGATGAAGGAGAG  
AGTGCGAAAGGAGGAGGAGAAGGGGGTGACGGCGGCCGCGCTGTTCCCTGGATACC  
GTGCTGCTGCTGGAGGCGGAAGGCTGGCTGCGGGGCTTTCTGGACGCCCTTGTTGCAGC  
AGGTTACACTGGACTGGCAGAAGCAATAGAAAAGTGGGACTTCAGCAAAGTGGAAAACTG  
GAACTGCACAGACAGCTGTTGAAGCGGATAGAAGCAACAATGCTAGAAATTGACCCAGTA  
GCACTCATGCCTTACATAAACACATGCCTGATAGAGAGGGAGTGTGATGAGATCCTGCAGA  
TTTGTGAATACAGAAGCAAAGCAGCGGGGATAACTAACTCATTGAATGTCTCTGTGCTC  
GGATAAGGAAAAGTGGCCGAAAAGTCTTCAGCTGGCATTGGATATGGCAGGGTATTACAAT  
GCAAGTGAAGTGTGGAATTTAAGAGAAGATAATGGCAAAGATGTTGATGGTGAAATGACAG  
GTGCCTCTGAGAATTGCTTTGAAACCACGATAACATTTGCTGAAGAAGCAGAATGTGATAAT  
AATCTCAGTGAAAATCTTTCTTCGGGTTGAGGAATGGTCCATCAGTCTTCATCTGTTTATGA  
ACCAAAGAAGGCTCGAACCTACCAGATTGAACTTGCACAGCCTGCTATCAATGGGAAAAAC  
ACACTGATATGTGCCCTACAGGATCTGGAAAACTTTTGTGGCGCTTCTGATTTGTGAAC  
ACCATTTGCAAACGTGCCCTCTGGAAAAAGCCAAAAGTTGTCTTTCTCGCAACCAAAGT  
GCCAGTGTATGAACAACAGAAAAATGTATTGAGACAGCATTGAAAGAAGTGGATACTCT  
GTTCAAGGAATATGTGGTGAAACAGTTGCAAATGTCTCGGTAGAACACGTTATACAGGACA  
GTGACATCATTGTGCTCACGCCCCAGATTCTTGTGAATAGCATCGAGACTGGGATCCTTAG  
CTCTCTCTCCATCTTCACTCTGATGATATTTGATGAGTGTACAAACACCACAGGCAACCACC  
CTTACAATGTGTTAATGACCAGATACCTGGAACAAAATTTAACTCCTCTGCAAACCAACTG  
CCTCAGATTGTAGGTTTAACTGCTTCTGTTGGAGTTGGTAATGCCAAGAACATCAAGGAAA  
CTATAGAGCACATATGTACCCTCTGCTCCTACCTTGACATACAGGCCATATCCACTGTCAG  
AGAGAACAAAGAGGATCTGCAGAGATTCAGAAACAAGCCAGAATCACATGTCAGATGGGTT  
AAAATGCGAGCTCAGAATCACTTTGCAGACATTATCTCAGGTCTGATGTCTGAAACAGAGG  
CGATGATGAGGAAGATTTACTCATCAGATACTATCTCCCAAATCAACAAGAATGATTTTGA  
ACACAGAAATATGAACAGTGGATAGTTCTCACTCAGAAGAAATGCAGACTGTTGCAGCTGG  
CAGATAAGGAGAAGGAGAGCAACATTTGTAGAGACCTTTTCATTTGTACCGAACACTTGCG  
GAAATTCAACGATGCTCTCATTATCAGTGAAGATGCACGCATCGAAGATGCTTTAGCCTAC  
CTAAATGAATTTTTCACAAATGTGAAAAATGGACCATATACAGAGTTAGAGAAGCAACTGAC

GGACAAATTTCAAGAGAAAGAACCAGAACTGACTGCCCTTTCAAAAGATGAATCAAATGAG  
AATCCCAAGCTGGAAGAGCTTGCTTCCATCCTGGACGAAGCATACCGCTATAACCCACAAA  
CTCGCACTATTCTCTTTGCCAAGACAAGAGCCTTAGTAGCTGCTTTGAAGAAGTGGATGGA  
AGCAAACCTCTACTTAGCCACATAAAGCCAGATGCGTTGATGGGTCAGGGAAGAAAAGAA  
CATAAACAGGTATGACCCTGCCAATGCAGAAGGGTGTGCTGGATGCCTTCAAAACCGAC  
AAAGACAGCAGACTGCTAATTGCTACATCCGTTGCTGATGAAGGCATTGATATTTCTGAGT  
GCAACCTTGTTGTGCTCTATGAATACTTCGGTAATGTCACCAAATGATCCAAGTCAGAGGT  
CGTGGAAGGGCAAAAGACAGCAAGTGCGTCCTTGTGACAAGCAAAGTGGAAAGTGGTTGAG  
AATGAAAAACAGAACCGTTATAAGGAAGAAATGATGAATGCAGCTATTGAAAACCTGCAGA  
ACTGGGATGAAACAACATTTGCAAGAAAGATACGTGACCTGCAAGTGAAGGAAAAGGTATT  
ACGAGATTGCAGGAAGAAAGAACTATAAACATGAAGTAGTGGAAGGGAAAAAAATCTT  
CTGTGTGGAAGTGCAGAGCCTATGCCTGCTGTACAGATGACATCAGAATTATAAAGGACT  
CTCATCACACTGTCCTAGGAGATGCATTCAAGGAGCGTTATATAATGAAGCCTCACCAGAA  
ACCACGTCCATTTGATGTTTTTGAGAAAAAAGCAAGATGCATTGCCAAAAAACTAATTGCC  
AGCATGACTGGGGGATCACAGTGAAGTACAAGACATTTGATAATCTACCAATCATCAAAAT  
CAGAAGCTTTGTAGTAGAGGACATTGAACTGGGACACAGATGGATTTTCAGAAATGGAAA  
AATATTAATTCTTCTTTGAAGAATTTGATGAAGAAACATCCAGCTGA

>poecile\_atricapillus-rig1

ATGACGGCGGAGGAGAAGCAGAACCTGCGGTGCTTCAGGCGGTACATCGAGAAGATCCT  
GAACCCCGTGACATCCTCGGCAACATGACGGACTGGCTGTCCGACGAGGTGAAGGAGA  
GGGTCCGAAAGGAGGAGGAGAAGGGGGTGACGGCGGCCGCCGCGCTGTTCTGGATGC  
CGTGCTGCTGCTGGAGGCGGAGGGCTGGCTGCGGGGCTTCCTGGATGCCCTGGTGGCAG  
CAGGTTACACTGGACTGGCAGAAGCAATTGAAACTGGGACTTCAGCAAATGGAAAACT  
GGAGCTGCACAGGCAGCTGTTGAAGCGGATAGAAGCAACAATGCTAGAAATTGATCCTGT  
AGCCATCATGCCATTCATAAACACATGCCTGATAGACAGGGAGTGTGATGAGATCCTGCAG  
ATCAGTGAATACAGAAGCAAAGCAGCTGGGATAACTAACTCATTGAATGCCTCTGTGCT  
CAGATAAGGAAAACTGGCCCAAAGTCTTCAGCTGGCATTGGATAATGCAGGATATTACAA  
TGCAAGTGTACTGTGGAATATAAGAGAAGATAATGGCAAAGATGTGGATAGTGAAATGACA  
GATGCCTCTGAGAATTACTTTGaAACCATGGTGACTTTTTCTGAAGAAGCAGAATGTGATAA  
TCTCAGCAAAAATCTCTCTTCAGTTTCAGAAAGTGTCTATGCATCTCCGTCTGTTTATGAAC  
CAAAGAAGGCTCGGAGCTACCAGATTGAGCTTGACAGCCTGCTATTGATGGGAAAAACA  
CATTGATTTGTGCCCCACAGGATCTGGAAAACTTTTTGTGGCACTTATGATTTGTGAACAT  
CATTTGCAAAACATTCCCTCAGGACGAAAGGCAAAAGTTGTCTTCCTTGCAACCAAAGTGC  
CAGTGTATGAGCAACAGAAAAATATATTCAGGCAGCATTTTGAAAGAAGTGGATACTCTGTT  
CAAGGAATTTGTGGTGAACAGTTGCAAATATCTCTGTAGAAAATATTATACAGGACAGTGA  
CATCATTGTGATAACACCCCAAGATTCTTGTAATAGCATGGAGAAAGGGATCCTTAGCTCC  
CTCTCCATCTTCACTCTGATCATATTTGATGAGTGCCACAACACTACAGGCAACCACCTTA  
CAATGTGTTGATGACCAGGTACCTGGATGAAAAATTTGACTCCTGTGCAAACCAGCTGCCT  
CAGATTATAGGTTTAACTGCTTCTGTTGGAGTTGGTAATGCCAAGAGCACTAATGAACTGT  
AGAGCACATCTGTGCTCCTCTGCTCCTACCTTGACATACAGACCATATCCACTGTCAGAGTG  
AACAAACAAGATCTGCAGAGGTTTGGAAACAAACCAGAAACACATATTAGATGGGTTAAAT  
GCGAGCTCAAAATAATTTTGGGACATTATCTCAGGTCTGATGTCTGAGACAGAGGTGTTG  
ATGAGGAAGATTTATTCAGCAGATACCATCTCCRAATCAACAAGAATTACTTTGGAACACA  
GAGATATGAACAGTGGATAGTTTCCACTCAGAAGAAATGCAGACTGTTGCAACTGGAAGAT

AAGGAGAAGGAGAGCAGTATTTGTAGAGAACTTTTCATTTGTAAGCACTTGCGGAAATT  
CAATGATGCTCTCATTATCAGTGAAGATGCTCGCATTGAAGATGCTTTAGCCTACCTAAAAAG  
AATTTTTTCACAAATGTGAAAAATGGACCATATACAGAGTTAGAGAAGCAGCTGACAGAGAAA  
TTTCAAGAGAAAGAGCTAGAGCTCACTGCTCTTTCAAAAGATGAGTCAAATGAGAATCCAAA  
GTTGGAAGAGCTCACTTGCATCCTGGATGAAGCATACCACTATAACCCAGAGACTCGCACT  
ATTCTCTTTGCCAAGACAAGAGCCTTAGTAGCTGCTTTGAAGAAGTGGATAGAAGCAAACC  
CTGTACTTAGCCACATAAAGACAGATGTGTTGATGGGTAAGGGAAGAAGAGATCATAAAAC  
AGGTATGACCCTGCCAATGCAGAGGGATGTACTGGATGCATTCAGAAATGATAAAAACATC  
AGACTGCTGATTGCTACATCTGTTGCTGACGAAGGCATTGATATTACTGAGTGCAACCTTG  
TGGTGCTCTATGAATACTTCGGTAATGTCACCAAAATGATCCAAGTCAAAGGTCGTGGAAG  
GGCAAGAGACAGCAAGTGCATCCTTGTGACAAGCAAAACAGAAAGTGGTTGAGAATGAAAA  
ACTAAACAGTTACAAGGAAGAAATGATGAATGCAGCTATTGAAAAGCTACAGAACTGGGAT  
GAAACAACGTTTGAAGAAAGATACACGGCCTGCAAATGAAGGAAAAGATACTACGAGATT  
CCAGGAAGAAAGAAACAAAACATAAAGTAGCGGAAGGGAAGAAAATCTCTTGTGCGGAAA  
ATGCAAAGCGTATGCCTGCAGTACAGACGACATCAGAGTTATACAGGAATCTCATCACACT  
GTCCTAGGTGATGCGTTCAAGGAGCGTTATATAACAAAGCCCCACCGGAAACCAGTTCAGT  
ATGATGGTTTTGAGAAAAAAGCAAGATGCATTGCCGCAATACTGAATGCCAGCATGACTG  
GGGGATCACAGTGAAGTACAAGACATTTGATAATCTACCAGTGATCAAATCAAAGCTTTG  
TACTAGAGAATATTGAAACTGGGACACAAATGGATTTTCAGAAATGGAAAAACATTAATTTTT  
CTTTGAAGAATTTTGATGAAGAAGCATCCAACCTGA

>porzana\_atra-rig1

ATGACGGCGGAGGAGAAGAAGAGCCTGCAGTGCTACAGGCATTACATCGAGAAGAGCCT  
GAACCCCGTCTTCATCCTGAGCAACATGACGGACTGGCTGTGCGACGAGGTGAAGGAGAG  
GGTCCGCAAGGAGGAGGAGGAGAAGGGGGTGACGGCGGCCGCGCGCTGTTCTTGAT  
GCCGTCCTGCAGCTGGAGGCGGAGGGCTGGCTCCGGGGCTTCCTGGACGCCCTGGTTG  
CAGCAGGTTACACTGGACTGGCAGAAGCAATTGAAAAGTGGGACTTCAGCAAAGTGGAAA  
AACTGGAGCTGCACAGACAGCTGTTGAAGCGAATAGAAGCAACAATGCTAGAAGTTGATCC  
AGTATCACTCATGCCCTACATAAACACGTGCCTGATAGCAAGGGAGTGTGATGAGATCCTG  
CAGATCAGCGACTACAGGAGCAAAGCAGCTGGGATAACTAAGCTCATTGAATGTCTGTGTC  
GGTCAGATAAGGAAAAGTGGCCAAAAGCCTTCTACTGGCACTAGAAAGTACAGGATATTA  
CAATGCAAGTGAAGTGTGGGATATAAGAGAAGAAAATGACAAAGATGTCGATGGTGGAAATG  
ACAAATGCCTCTGAGAGCAGCTTTGAAACAATATCATTTTCTGAAGAAGCAGAATGTGATAA  
TAATCTCAGTGAAAATCTCTGTTTCAGCTTCAGAAGGGGTTTGCCAGTCTCCACCTGTTTATG  
AACCAAAGAAGGCTCGGAGCTACCAGACTGAACTTGACAAACCTGCTATCAATGGCAAAAA  
CACATTGGTGTGTGCCCCACAGGATCTGGGAAGACTTTTGTGGCACTTATGATTTGTGAG  
CACCATTTCCAAAACACACCTGCGGGGCGAAAGGCAAAAGTTGTCTTCCTGGCAACAAAAG  
TGCCAGTGTACCAACAGCAGCAAAGTGTATTCCAGCAGCATTTTCAAAGAAGTGGATATTC  
TGTTCAAGGAGTTAGTGGTGAAAGTGTGCAAATGTCTCCTTAGAAAAGGTTATAGAGGGC  
AGTGACATTCTTGTGCTGACACCCAGATTCTTGTGAATAGCATGGAGGAAGGGATCCTTA  
GCTCCCTTTCCATCTTCACACTGATGATATTTGATGAGTGCCACAACACTAGAGGCAACCA  
CCCTTACAATGTGTTAATGACCAGATACCTGGAACAGAAATTTGACTCCCCTGCAAACCCG  
CTGCCTCAGATTGTAGGTTTAACTGCTTCTGTGGGAGTTGGAAGTGCCAAGACCGTTACGG  
AAACGATAGAGCACATCTGTACCCTTTGCTCCTACCTTGACATACAGGCCATATCCACTGTT  
AGAGAGAACACACAGGATCTGCAGAGATTTGTGAACAAGGCAGAAACATATGTCAGGTGT

GTAAAAATGCGAGCTCAGAATCACTTTGCAGACATTATCTCAGGCCTGATGTCAGAGACAG  
AGGCATTGATGAGGAAGATTTACACAGTGGACAGCATCTCTCCAATCAACCGGAATGATTT  
TGGAACACAGAAATATGAACAATGGATAGTTTCCACTCAGAAGAAATGCAGACTGTTGCAA  
CTGGAAGATAAGGAGAAAGAGAGCAACATTTGCAGAGACCTTTTCATTTGCACTGAACACC  
TGCGGAAACTGAATGATGCCCTCATCATCACTGAAGATGCCCGCATCGAAGATGCTTTAGC  
CTACCTAACCGAATTCTTCACAAATGTCAAAAATGGACCATATACAGAGTTAGAGAAGCAAC  
TGACAGGCAAATTTCAAGAGAAAGAACCGAAACTGACTGCCCTTTCAAAAGATGAATCAAA  
TGAGAATCCCAAACCTGGAAGAGCTTGCTTGCATCCTGGATGAAGCATACCACTATAACCCA  
GAGACTCGCACTCTCGTCTTTGCTAAGACAAGAGCCTTAGTAGCTGCTTTGAAGAAGTGGA  
TGGAAGCAAACCTCTGCTTAGCCACATAAAACCAGGTGTGCTGATGGGTCGTGGAAGAA  
AAGATCAAAAAACAAGTATGACGCTTCCAATGCAGAAGGGTGTACTGGATGCATTCAAAAC  
CAACAAAGACTGCAAGCTGCTAATTGCTACATCTGTTGCTGATGAAGGCATTGATATTTCTC  
AGTGCAACCTTGTTGTGCTCTACGAATACTTTGGTAACGTCACCAAAATGATCCAAGTCAGA  
GGTCGTGGAAGGGCAAGAGACAGCAAGTGCATCCTTGTGACAAACAAAACAGAAGTGTT  
GAGAACGAGAGACAGAACCGTTTTAAGGAAGACATGATGAATGAAGCTATTGAAAAGCTAC  
AGAACTGGGATGAAACAAAATTTACAAAAAAGATACATGGCCTGCAAATGAAGGAAAAAGT  
ATTAAGAGATTCCAGAAAGAAAGACACAAGTTGTAAGGTACTGGAAGGAAAAAAAATCTTC  
TCTGTGGAAAATGCAAAGCATATGCCTGCAGTACAGATGACATCAGAGTTATAAAGGAATC  
TCATCATACTGTCCTAGGAGATGCATTCAAGGAGCGTTATATAACAAAGCCTCACCACAGA  
CCAGTCCAGTTCGACTGTTTTGTGAAAAAAGCAAGATGCACTGCCAAAATACTAATTGCCA  
GCATGACTGGGGAATCATAGTAAAGTACAAGACATTTGATGATCTACCAGTGATCAAAATCA  
AAAGCTTTGTAGTAGAGCAAGTTGAACTGGGACACAAATGGATTTTCAAAAATGGAGAGA  
TATTAATTTTTCTCTGAAGAATTTTGATGCTGAAGAAACATCCAGCTGA

>pseudopodoces\_humilis-rig1

ATGACGGCGGAGGAGAAGCAGAGCCTGCGGTGCTTCAGGCGGTACATCGAGAGGATCCT  
GAACCCCGTGACATCCTCGGCAACATGACGGACTGGCTGTCCGACGAGGTGAAGGAGA  
GGGTCCGAAAGGAGGAGGAGAAGGGGGTGACGGCGGCCGCCGCGCTGTTCTGGATGC  
CGTGCTGCTGCTGGAGGCGGAGGGCTGGCTGCGGGGCTTCGTGGATGCCCTGGTGGCA  
GCAGGTTACACTGGACTGGCAGAAGCAATTGAAAACCTGGGACTTCAGCAAACCTGGAAAAA  
CTGGAGCTGCACAGGCAGCTGTTGAAGCGGATAGAAGCAGCAATGCTAGAAATTGATCCT  
GTAGCAATCATGCCATACATAAACACATGCCTGATAGACAGGGAGTGTGATGAGATCCTGC  
AGATCAGTGAATACAGAAGCAAAGCAGCCGGGATAACTAACTCATTGAATGCCTCTGTGCG  
CTCAGATAAGGAAAACTGGCCCAAAGTCTTCAGCTGGCATTGGATAATGCAGGATATTAC  
AATGCAAGTGTACTGTGGAATATAAGAGAAGATAATGGCAAAGATGTGGATAGTGAAATGA  
CAGATGCCTCTGAGAATTACTTTGAAACCATGGTGACTTTTTCTGAAGAAGCAGAATGTGAT  
AATCTCAGCAAAAATCTCTCTTCGGTTTCAGAAAGTGTCTATGCATCTCCATCTGTTTATGA  
ACCAAAGAAGGCTCGGAGCTACCAGATTGAGCTTGCACAGCCTGCTACTGATGGGAAAAA  
CACATTGATTTGTGCCCCCACAGGATCTGGAAAACTTTTGTGGCACTTATGATTTGTGAAC  
ATCATTGCAAACATTCCATCAGGACGAAAGGCAAAAGTTGTCTTCCTTGCAACCAAAGTG  
CCAGTGTATGAGCAACAGAAACTATATTCAGGCAGCATTTTGAAAGAAGTGGAATCTG  
TTCAAGGAATTTGTGGTGAACAGTTGCAAATATCTCTGTAGAAAATATTATACAGGACAGT  
GACATCATTGTGATAACACCCCAAGATTCTTGTGAATAGCATGGAGAAAGGGATCCTTAGCT  
CCCTCTCCATCTTCACTCTGATCATATTTGATGAGTGCCACAACACTACAGGCAACCACCCT  
TACAATGTGTTGATGACCAGGTACCTGGATGAAAAATTTGACTCCTCTGCAAACCAGCTGC

CTCAGATTGTAGGTTTAACTGCTTCTATTGGAGTTGGTAATGCCAAGAGCACTAATGAAACT  
GTAGAGCACATCTGTACCCTCTGCTCCTACCTTGACATACAGACAATATCCACTGTCAGAG  
TGAACAAACAAGATCTGCAGAGGTTTGAACCAAGCCAGAAACACATATCAGATGGGTAA  
AATGCGAGCTCAGAATCATTTTGCAGACATTATCTCAGGTCTGATGTCTGAGACGGAGGTG  
TTGATGAGGAAGATTTATTTCAGTGGATACCATCTCCCAAATCAACAAGAATTACTTTGGAAC  
ACAGAGATATGAACAATGGATAGTTTCCACTCAGAAGAAATGCAGACTGTTGCAACTGGAA  
GATAGGGAGAAGGAGAGCAGTATTTGTAGAGAACTTTTCATTTGTAAGTGAACACTTGCGGA  
AATTCAATGATGCTCTCATTATCAGTGAAGATGCCCGCATTGAAGATGCTTTAGCCTACCTA  
AAAGAATTTTTTCACAAATGTGAAAAATGGACCATATACAGAGTTAGAGAAGCAGCTGACGG  
AGAAATTTCAAGAGAAAGAGCTAGAGCTCACTGCTCTTTCAAAAGATGAGTCAAATGAGAAT  
CCAAAGTTGGAAGAGCTCACTTGATCCTGGACGAAGCATACCACTATAACCCAGAGACTC  
GCACTATTCTCTTTGCCAAGACAAGAGCCTTAGTAGCTGCTTTGAAGAAGTGGATAGAAAC  
AAACCCTGTACTTAGCCACATAAAGACAGATGTGTTGATGGGTAAGGGAAGAAGAGATCAT  
AAACAGGTATGACCCTGCCAATGCAGAGGGATGTACTGGATGCATTGAGAAATGATAAAA  
ACATCAGACTGCTGATTGCTACATCTGTTGCTGACGAAGGCATTGATATTACTGAGTGCAA  
CCTTGTGGTGCTCTATGAATACTTCGGTAATGTCACCAAAATGATCCAAGTCAGAGGTCGT  
GGAAGGGCAAGAGACAGCAAGTGCATCCTTGTGACAAGCAAAACAGAAGTGGTTGAGAAT  
GAAAAACTAAACAGTTACAAGGAAGAAATGATGAATGCAGCTATTGAAAATCTACAGAAGT  
GGATGAAACAACGTTTGAAGAAAGATACATGGCCTTCAAATGAAGGAAAAGATACTACGA  
GATTCCAGGAAGAAAGAAAACAAAACAGAAAGTAGTGGAAGGGAAGAAAAATCTCTTGTGCG  
GAAAATGCAAAGCATATGTCTGCAGTACAGACGACATCAGAGTCATACAGGAATCTCATCA  
CGCTGTCCTTGGTGATGCGTTCAAGGAGCGTTATATAACAAAGCCCCACCAGAAACCAGTT  
CGGTATGATGGTTTTGAGAAAAAAGCAAGATGCATTGCCGCAATACTGAATGCCAGCATG  
ACTGGGGGATCACAGTGAAGTACAAGACATTTGATAATCTACCAAGTATCAAAATCAAAAG  
CTTTGTACTAGAGGATGTTGAACTGGGACACAAATGGATTTTCAGAAATGGAAAGACATTA  
ATTTTTCTTTGAAGAATTTTGATGAAGAAGCATCCAAGTGA

>pseudorectes\_ferrugineus-rig1

ATGACGGCGGAGGAGAAGAGGAACCTACGGTGCTACAGGCGGTACATCGAGAGGAGCCT  
GAACCCCGTGATACATCCTCAGCAACATGACGGACTGGCTGTCCGACGAGGTGAAGGAGAG  
AGTCCGAAAGGAGGAGGAGAAGGGGGTGACGGCGGCCGCGCTGTTTCATGGACGCC  
GTGCTGCTGCTGGAGGCGGAGGGCTGGCTGCGGGGCTTGCTGGATGCCCTGGTTGCCG  
CAGGTTTAACTGGACTGGCAGAAGCAATCGAAAAGTGGGACTTCAGCAAACTGGAAAACT  
GGAAGTGCACAGGCAGCTGTTGAGGCGGATAGAAGCAACAATGCTAGAAATCGATCCGGT  
AGCAATCATGCCATACATAAACACATGCCTGATAGAGAGGGAATGTGATGAGATCCTGCAG  
ATCAGTGAATACAGAAGCAAAGCGGCTGGGATAACTAACTCATTGAATGCCTCTGTGCGCT  
CGGATAAGGAAAAGTGGCCCAAAGTCTTCAGCTGGCATTGGACAGTGCAGGATATTACAA  
TGCAAGTGAAGTGTGGAATATAAGAGAAGATAATGGCAAAGATGTTGATGGTGAAATAACA  
GATGCCTCTGAGAATTACTTTGAAACCACGATGACATTTTCCGAAGAAGCAGAATGTGATAA  
TCTCAGTGAAGTCTCTCTTCAGTTTCAGAAAGGGTCTGTGAGTCTTCATCTGTTTATGAAC  
CAAAGAAGGCTCGGAGCTACCAGATTGAGCTTGACAGCCTGCTGTTGATGGGAAAAACA  
CATTGATTTGTGCCCCACAGGATCTGGAAAACTTTTGTGGCACTTCTCATTGTGAACAT  
CATTGCAAAACGTTCTTCAGGACGAAAGGCAAAAGTTGTCTTCTTGCAACCAAAGTGC  
CAGTGTATGAGCAACAGAAAAATGTATTCAGGCAGCATTTTGAAGAAGTGGATACTCTGTT  
CAAGGAATTTGTGGTGAAACAGTTGCAAATATCTCTGTAGAAAATGCTATACAGGACAGTG

ACATCATTGTGCTAACGCCCCAGATTCTTGTGAATAGCATGGAGAAAGGGATCCTTAGCTC  
CCTCTCCATCTTCACTCTGATGATATTTGATGAGTGCCACAACACTACAGGCAACCACCCTT  
ACAATGTGTTGATGACCAGATACCTGGATCAAAAATTTAACTCCTCTGCAAACCAGCTGCCT  
CAGATTGTAGGTTTAACTGCTTCTGTTGGAGTTGGTAATGCCAAGACCATCAGTGAAACTG  
TAGAGCACATCTGTACCCTCTGCTCCTACCTTGACATACAGGCCATATCCACTGTCAGGGA  
GAACAAACAAGATCTACAGAGGTTTCGGAACAAGCCAGAAACACATATCAGATGGGTAAA  
ATGCGAGCTCAGAATCGCTTTGCAGACATTATCTCAGGTCTGATGTCTGAGACAGAGGTGT  
TGATGAGGAAGATTTACTCAGTGGATACCATCTCCCAAATCAACAAGAGTTACTTTGGGAC  
ACAGAGATATGAACACTGGATAGTTTTCACTCAGAAGAAATGCAGACTGTTGCAACTGGAA  
GATAAGGAAAAGGAGAGCAACATTTGTAGAGACCTTTTCATTTGTACTGAACACTTGCGGA  
AATTCAACGACGCTCTCATTATCAGTGAAGACGCCCGCATCGAAGATGCTTTAGCCTACCT  
AAATGAATTTTTCACAAATGTAAAAGATGGACCATATACAGAGTTAGAGAAGCGACTGACG  
GACAAATTTCAAGAGAAAGAACCAGAGCTGACTGCCCTTTCGAAAGATGAGTCAAATGAGA  
ATCCAAAGCTGGAGGAGCTTGCTTGCATCCTAGATGAAGCATACCGCTATAACCCACAGAC  
TCGCACTATTCTCTTTGCCAAGACAAGGGCCTTAGTAGCTGCTTTGAAGAAGTGGATAGAA  
GCAAACCCTCTACTTAGCCACATAAAGCCAGATGTGTTGATGGGTAAAGGGAAGAAGAGATC  
AAAGAACAGGTATGACCCTGCCAATGCAAAAGGGTGTACTGGATGCATTGAGAAATGACAA  
AGACATCAGACTGCTAATTGCTACATCTGTTGCTGACGAAGGCATTGATATTACTGAGTGC  
AACCTTGTGGTGCTCTATGAATACTTCGGTAATGTCACCAAAATGATCCAAGTCAGAGGTC  
GTGGAAGGGCAAGAGACAGCAAGTGCATCCTTGTGACAAGCAAAACAGAAGTGGTTGAGA  
ATGAAAAACAAAACATTTACAAGGAAGAAATGATGAATGCAGCTATTGAAAAGCTACAGAAC  
TGGGATGAAACAACATTTGCAAGAAAGATACGTGACCTGCAAATGAAGGAAAAGAACTAC  
GAGATTCCAAGAAGAACAACAAAATACGAAGTAGTGGAAGGGAAAAAAATCTTTTGTG  
TGGAAAATGCAAAGCATATGTCTGCAGTACCGATGACATCAGAATTATAAAGGAATCTCATC  
ACACTGTCCTAGGTGACGCGTTCAAGGAGCGGTATATAACAAAGCCCCACAAGAAACCGG  
TTCAGTTTGATGGTTTTGAGAAAAAAGCAAGATGCATTGCCGAAATACTGACTGCCAACAT  
GATTGGGGGATCACAGTGAAGTACAAGACATTTGATACTCTACCAGTGATCAAAATCAAAA  
GCTTTGTACTAGAGGACGTTGAACTGGGACACAAGCAGATTTTCAGAAATGGAGAAGTAT  
TAATTTGTCTTTGAAGAATTTTGATGAAGAAGATGAGCTGAACTCAACATTTAA

>psittacula\_krameri-rig1

ATGACGGCGGCGGAGAAGAGGAACCTGCAATGCTACAGGCGGTACATCGAGAAGAGCCT  
GAACCCCGTCTACATCCTGGGCAACATGACGGCCTGGCTGTCCGACGAGCAGAAGGAGC  
GGGTCCGTAAGGAGGAGGAGAAGGGAGTGACGGCGGCCGCCGCGCTGTTCTTGATAC  
CATCCTGCTGCTGGAGGCGGAGGGATGGCTCCGGGGCTTCCTGGATGCCCTGGTTGCAG  
CAGGTTACACTGGATTGGCGGAAGCAATTGAAAATTGGGACTTCAGCAAGCTGGAAAACT  
GGAGTTGCACAGACAGCTGTTGAAGCGGATAGAAGCAACTATGCTAGAAGTTGATCCGT  
AGCACTCATGCCTTACATAAACACGTGCCTGATACAAAGGGAGTGTGATGAGATCCTGCAG  
ATTAGCGAATACAGAAGCAAAGCAGCTGGGATAACTAACTCATTGAATGTCTCTGTGAT  
CAGATAAGGAAAACTGGCCAAAAAGCCTTCAGCTGGCACTGGATAACACGGGATATTACAA  
TGCAAGTGAAGTGTGGGATATGAGAGAAGATTATGGCAAAGACGTTGATGGTGAAATGACA  
GATGACTTTAAGAACAGCTTTGAAACCACAATGATGTTTTCTGAAGAGGCAGAATGTGATAA  
TAATCTCAGTGAATCTCTGTTTCAGGTTTCAAGAGGTCTATCAGTCTTCACCTGTTTCATG  
AACCAAAGAAGGCTCGGAGCTACCAGACTGAACTTGACAGCCCGCTATCAATGGGTGTA  
ACACATTGATATGTGCCCCACAGGATCTGGAAAACTTTTGTGGCACTGATGATTTGTGA

ACACCATTTCCAAAACATGCCCTCAGGACGAAAGGCCAAAAGTTGTCTTTCTTGCAAGTCAA  
CTGCCAGTGTATGAACAACAGAAAAATGTATTCAAGCAGCACTTTGAAAGAAGTGGATATTC  
TGTTCAAGGAATTAGTGGTGAAACAGTTGCAAATGTCGCTGTTGAAAAAGTTATACAGGAC  
AGCGACATCATTGTGCTAACACCCCAGATTCTTGTGAATAGCATCGAGGAAGGGATCGTTA  
GCTCCCTCTCCATCTTCACTCTGATGATATTTGATGAGTGCCACAACACTGTGGGCAACCA  
CCCTTACAATGTGTTAATGACCAGATACCTGGAACAAAAATTTGACTCCTCTGCAAGCCAG  
CTACCTCAGATTGTAGGTTTAACTGCTTCTGTTGGAGTTGGTAATGCCAAGACCATCAAGG  
AAACGATAGAGTACATCTGTACCGTCTGTGCCAGCCTTGACGTACAGGCCATATCTACTGT  
CAGAGAGAACAAACAGGATCTGCAGAGATTTGGAAACAGGCCAGAAATACATGTCAGATG  
GGTGAAAATGAGAGCTCAAATCATTGTCAGGGATTATCTCAGGCCTGATGTCTGAAACG  
GAGGCATTGATGAGAAAGAATTACTCAGTGGATACTATCACCCAGATCAACAAGAACGATT  
TTGGAACACAAAAATATGAACACTGGATAGTCACCACTCAGAAGAAATGCAGACTACTGCA  
ACTGGCAGATAAGGAGAAGGAGAGCAGAATTTGTAGAGACCTTTTCATTTGCACTGAACAC  
CTGCGGAAATTCAATGATGCTCTCATCATCAGTGAAGATGCCCGCATTGAAGATGCTTTAG  
CCTACCTAACTGATTTTTTTCAGAAATGTCAGAAACGGACCATATACAGAGTTAGAGAAGCAG  
CTTACAGCCAAATTTCAAGAGAAAGAACC AAAACTGTCTGCCCTTTCGAAAGACGAATCAA  
TGAGAATCCGAAACTGGAAGAGCTTGCTTGCATCCTGGATGAAGCATACCACTATAACCCA  
CAGACTCGCACTATTCTCTTTGCCAAGACAAGAGCCTTAGTAGCCGCTTTGAAGAAGTGGA  
TAGAAGCAAACCCTCTATTTAGCCACTTAAAGCCGGGTATATTGATGGGTCATGGAAGAAG  
AGATCAAAAAACAGGTATGACTCTCCAATGCAGAAGGGTGTACTGGATGCATTCAAACC  
AACAAAGACACCAGACTGCTAATTGCTACTTCTGTTGCTGATGAAGGCATTGATATTTCTGA  
GTGCAACCTTGTTGTGCTCTATGAATACTTCGGTAATGTCACCAAATGATCCAAGTCAGAG  
GTCGTGGAAGGGCTAAAGACAGCAAGTGCATCCTTGTGACAAACAAAACAGAAGTGGTTG  
AGAAAGAGAAACACAACCGTTACAAGGAAGAAATGATGAATGAAGCTGTTGAAAAGCTACA  
GAATTGGGATAAAAGAACATTTGCAAGAAAGATACATGATTTGCAAATGAAGGAAAAGGTG  
TTACGAGATTCCAGGAAGAAAGAAACACGATACAAGGTAGCGGAAGGAAAGAAAAATCTTC  
TGTGTGGAATGCAAAGCATTGCTGCTGCAGTACAGATGACATCAGAATTATAAAGGAATCT  
CATCACACTGTCCTAGGAGACGCATTCAAGGAGCGGTATATAACAAAGCCTCACCATAAAC  
CAGTCCAGTTTGATGATTTTGAGAAAAAAGCAAGATGCATTGCCAAAATACTAACTGCCAG  
CATGACTGGGGAATCATAGTGAAGTACAGGACATTTGATAATCTACCAGTGATCAAATCAA  
AAGCTTTGTAGTAGAGAACATTGAACTGGGACACAAATGGATTTTCAGAAATGGAAAGATA  
TTAATTTTTCTCTGAAGAATTTTGATGCTGAAGAACTGTCCAGCTGA

>psittacus\_timneh-rig1

ATGACGACGGAGGAGAAGAGGAACCTGCAATGCTACAGGCGGTACATCGAGAAGACCCT  
GAACCCCGTCTACATCCTGGGCAACATGACGGCCTGGCTGTCCGACGAGGAGAAGGAGC  
GAGTCCGTAAGGAGGAGGAAAAGGGGGTGACGGCGGCCGCCGCGTTGTTCTGGATACC  
ATCCTGCTGCTGGAGGCGGAGGGCTGGCTCCGGGGCTTCCTGGATGCCCTGGTTGCAGC  
AGGTTACACTGGAAGTGGCAGAAGCAGTTGAAAAGTGGGACTTCAGCAAGCTGGAAAAGCT  
GGAGTTGCACAGACAGCTGTTGAAGAGGATAGAAGCAACCATGCTTGAAGTTGATCCGGT  
AGCGCTCATGCCTTACATAAACACATGCCTGATAGAAAGGGAGTGTGATGAGATCCTGCAG  
ATTAGCGAATACAGAAGCAAAGCCGCTGGGATAACTAACTCATTGAATGTCTGTCTGAT  
CTGATAAGGAAAAGTGGCCAAAAGCCTTCAGCTGGCACTGGATAACACAGGATATTGCAA  
TGCAAGTGAAGTGTGGGATATGAGAGAAGATAACGGCAAAGATGTTAATGGTGAAATGACA  
GATGCCTTTGAGAACAGCTTTGAAACCACAATGAGGTTTTCTGAAGAGGCAGAAATGTGATA



ATCTCAGTGAAAATCTCTGTTTCAGGTTTCAGATGAGGTCTATCAGTCTTCACCTGTTTATGAG  
CCAAAGAAGGCTCGGAGCTACCAGACTGAACTTGCACAGCCTGCTATCAATGGATATAACA  
CATTGATATGTGCCCCACAGGATCTGGAAAACTTTTGTGGCACTGATGATTTGTGAACA  
CCATTTCCAAAACATGCCCTCAGGACGAAAGGCAAAAGTTGTCTTTCTTGCAGTCAAAGT  
CCAGTGTATGAACAACAGAAAAATGTATTCAAGCAGCACTTCGAAAGAAGTGGATATTCTGT  
TCAAGGAATCAGTGGTGAACAGTGGCAAATGTCTCTGTAGAAAAGGTTATACAAGACAGT  
GACATCATTGTGCTAACACCCCAGATTCTTGTGAATAGCATTGAGGAAGGGGTCCCTTAGCT  
CCCTCTCCATCTTCACTCTGATGATATTTGATGAGTGCCACAACACTATGGGCAACCACCC  
TTACAATGTGTTAATGAGTAGATACCTGGAAGAAAAATTTGATTCCTCTGCAAGCCAGCTAC  
CTCAGATTGTAGGTTTAACTGCTTCTGTTGGAGTTGGTAATGCCAAGACCATCAAGGAAAC  
GATAGAGTACGTCTGTACTGTCTGCGCCAACCTTGACGTACAGGCCATATCTACTGTCAGA  
GAGAACAACAGGATCTGCAGAGATTTGGAAACAAACCAGAAATACATGTCCGATGGGTGA  
AAATGAGAGCTCAAAATCACTTTGCAGAGATTATCTCAGGCCTGATGTCTGAGACAGAGAC  
GTTGATGAGAAAGAATTACTCAGTGGATGCTATCTCCAGATCAACAAGAATGATTTTGGAA  
CACAGAAATATGAACAATGGATAGTTGCCACTCAGAAGAAATGTAGACTATTGCAGCTGGC  
AGATAAGGAGAAGGAGAGCAGCATTTGCAGAGACCTTTTCATTTGCACTGAACACCTGCGG  
AAATTCAATGATGCTCTCATCATCAGTGAAGATGCCCGCATTGAAGATGCTTTAGCCTACCT  
AACTGATTTTTTTCAGAAATGTCAGAAATGGACCATATACAGAGTTAGAGATGCAACTTACAG  
CCAAATTTCAAGAGAAAGAACC AAAACTATCTGCCCTTTCAAAGATGAATCAAATGAGAAT  
CCCAAGCTGGAAGAGCTTGCTTGATCCTGGATGAAGCATACCACTATAACCCACAGACTC  
GCACTATTCTCTTTGCTAAGACAAGAGCCTTAGTAGCTGCTTTGAAGAAGTGGATAGAAGC  
AAACCCTTTATTTAGCCACATAAAGCCAGGTATATTGATGGGTCATGGAAGAAGAGATCAAA  
AAATAGGCATGACCCTCCCAATGCAGAAGGGTGTACTGGATGCATTCAAACCAACAAAGA  
AACCAGACTGCTAATCGCTACTTCTGTTGCTGACGAAGGCATTGATATTTCTGAGTGCAAC  
CTTGTTGTGCTCTATGAGTACTTCGGTAATGTACCAAAATGATCCAAGTCAGAGGTCGTG  
GAAGGGCTAAAGACAGCAAGTGCATCCTCCTGACAAACAAAAGTGAAGTGGTTGAGAAAG  
AGAAACACAACCGTTACAAGGAAGAAATGATGAATGAAGCTGTTGAAAAGCTACAGAATTG  
GGATAAAAGAACATTTGCAAGAAAGATACATGATTTGCAAATGAAGGAAAAGGTATTACGA  
GATTTCCGGAAGAAAGAAACACGATACAAGGTAGTGGAAGGAAAGAAAAATCTTCTGTGTG  
GAAAGTGCAAAGCATTTGCGTGCAGTACAGATGACATCAGAATTATAAAGGAATCTCATCA  
CACTGTCCTAGGAGACGCGTTCAAGGAGCGGTATATAACAAAGCCTCACCATAAACCAGTC  
CAGTTTGACTGTTTTGAGAAAAAAGCAAGATGCATTGCCAAAATACTAACTGCCAGCATGA  
CTGGGGAATCACAGTGAAGTACAAGACATTTGATAATCTACCAGTGATCAAATCAAAGCT  
TTGTAGTAGAGAACATTGAAACCGGGACACAAATGGATTTTCAGAAATGGAAAGATATTAAT  
TTTTCTCTGAAGAATTTTGATGCTGAAGAACTGTCCAGCTGA

>pyrrhura\_perlata-rig1

ATGACGGCGGAGGAGAAGAGGAACCTGCAATGCTACAGGCGCTACATCGAGAAGAGCCT  
GAACCCTGTCTACATCCTGGGCAACATGACAGCCTGGCTGTCGGACGAGGAGAAGGAGC  
GAGTCCGCAAGGAGGAGGAGAAGGGGGTGACGGCGGCCGCCGCTGTTCTGGATAC  
CATCTTGCTGCTGGAGGCGGAGGGCTGGCTCCGGGGCTTCTGGATGCCCTGGTTGCAG  
CAGGTTACACTGGGCTGGCAGAAGCAGTTGAAAATTGGGACTTCAGTAAGCTGGAAAACT  
GGAGTCGCACAGACAGTTGTTGAAGAGGATAGAAGCAACCATGCTAGAAGTTGATCCAGT  
CGCACTCATGCCTTACATAAACACGTGCCTGATAGAAAGGGAGTGTGATGAGATCCTGCAG  
ATTAGCGAATACAGAAGCAAAGCAGCTGGGATAACTAACTCATTGAATGTCTCTGTCGAT

CAGATAAGGAAAACCTGGCCAAAAAGCCTTCAGCTGGCACTGGATAACACAGGATATTACAA  
TGCAAGTGAACCTATGGGATATGAGAGAAGATAACAGCAAAGATGTTGATGGTGAAATGACA  
GATGCCTTTAAGAACAGCTTTGAAACCACAATAATGTTTTCTGAGGAGGCAGAATGTGATAA  
TAATCTCAGTGAATCTCTGTTCCGGTTCAGAAGAGGTCTATCAGTCTTCGCCTGTTTATG  
AACCAAAGAAGGCTCGGAGCTACCAGACTGAACTGGCACAGCCTGCTATCAATGGGTATA  
ACACATTGATATGTGCCCCACAGGATCTGGAAAACTTTTGTGGCACTGATGATTTGTGA  
GCACCATTTCCAAAACATGCCCTCAGGACAAAAGGCCAAAAGTTGTCTTTCTTGCAACCAA  
CTGCCAGTGTATGAACAACAGAAAAATGTATTCAAGCAGCACTTTGAAAGAAGTGGATATTC  
TGTCCAAGGAATTAGCGGTGAAACAGTTGCAAATGTCTCTGTAGAAAAGGTTATACAAGAC  
AGCGACATCATTGTGCTAACACCCCAGATTCTTGTGAATAGCATCGAGGAAGGGATCCTTA  
GTTCCCTCTCCATCTTCACTCTGATGATATTTGATGAGTGCCACAACACTATGGGCAACCAC  
CCTTACAATGTGTTAATGACCAGATACCTGGACCAAAAATTTGACTCCTCTGCAAGCCAACT  
ACCTCAGATTGTAGGTTTAACTGCTTCTGTTGGAGTTGGTAATGCCAGGACCACCAAGGAA  
ACAATAGAGTACATCTGTACTGTCTGCGCCAGCCTTGACATACAGGCCATATCTACTGTCA  
GAGAGAACAACAGGATCTGCAGAGATTTGAAACAACAGAAATACATGTCAGATGGGT  
GAAAATGAGAGCTCAAATCACTTTGCAGGGATTATTTGAGGCCTGATGTCTGAGACAGAG  
GCATTGATGAGAAAGAATGACTCAGTGGATACTATCTCCAGATCAGCAAAAATGATTTTG  
GAACACAGAAATATGAACACTGGGTAGTTGCCACTCAGAAGAAATGTAGACTATTGCAACT  
GGAAGATAAGGAGAAGGAGAGCAGCATTTCAGAGACCTTTTCATTTGCACTGAACACCTG  
CGGAAATTCAATGATGCTCTCATCATCAGTGAAGATGCCCGCATTGAAGATGCTTTAGCCT  
ACCTAACTGATTTTTTTCAGAAATGTCAGAAATGGACCATATACAGAGTTAGAGAAGCACCTT  
ACAGCCAAATTTCAAGAGAAAGTACCAAACTGTTAGCCCTTTCAAAAGATGAAGCAAATGA  
GAATCCCAAGCTGGAAGAGCTTGCTTGATCCTGGATGAAGCATACCACTATAACCCACAG  
ACTCGCACTATTCTCTTTGCAAAGACAAGAGCCTTAGTAGCTGCTTTGAAGAAGTGGATAG  
AAACAAACCCTCTATTTAGCCACATAAAGCCAGGTATATTGATGGGTCATGGAAGAAGAGA  
TCAAAAAACAGGTATGACCTCCCAATGCAGAAGGATGTACTGGATGCATTCAAACACCACC  
AAAGACACCAGACTGCTAATTGCTACTTCTGTTGCTGATGAAGGCATTGATATTTCTGAGTG  
CAACCTTGTTGTGCTCTATGAATACTTTGGTAACGTCACCAAAATGATCCAAGTCAGAGGTC  
GTGGAAGGGCTAAAGACAGCAAGTGCATCCTCCTGACAAACAAAACAGAAAGTGGTTGAGA  
AAGAGAAACAGAACCGTTACAAGGAAGAAATGATGAATGAAGCTGTTGAAGTGCTACAGAA  
TTGGGATAAAAGAACATTTGCAGGAAAGATACATGAATTGCAAAGGAAGGAAAAGGTATTA  
CGAGATTCCAGGAAGAAAGAAATGAGATACAAGGTAGTGGAAGGAAGGAAAATCTTCTGT  
GTGGAAAGTGCAAAGCATTGCGCTGCAGTACAGATGACATCAGAATCATAAAGGAATCTCA  
TCACACTGTCCTAGGAGATGCGTTCAAGGAGCGGTATATAACAAAGCCTCACCATAAACCA  
TGCCAGTTTGATGGTTTTGAGAAAAAAAGCAAGATGCATTGCCAAAATACTAACTGCCAGC  
ATGACTGGGGAATTATAGTGAAGTACAGGACATTTGATAATCTACCAGTGATCAAAATCAAA  
AGCTTTGTAGTAGAAAAACATTGCAACTGGAACACAAATGGATTTTCAGAAATGGAAAGATAT  
TAATTTTTCTCTGAAGAATTTTGATGCTGAAGAACTGTCCAGCTGA

>recurvirostra\_avosetta-rig1

ATGACGGCGGAGCAGAAGAGGAGCCTGGAGTGCTACAGGCGGTACATCGAGAAGATCCT  
GAACCCCGTCTACATCCTGAGCAACATGACGGAGTGGCTGTCCGACGAGGTGAAGGAGAA  
AATCCGGAAGGAAGAGGAGAAGGGGGTGACGGCGGCCGCGCTGTTTCTGGATGTCA  
TCCTGCAGCTGGAGGTGGAGGGATGGTTCCGGGGCTTCCTGGACGCCCTGGGTGCAGCA  
GGTTACAGTGGACTGGCAGAAGCAATTGAAAACCTGGGACTTCAGCAAACTGGAAAACTG

GAGTTGCACAGACAGCTGTTGAAGCGGATAGAAGCAACAATGCTAGAAGTGGATCCGGTA  
CTGCTCATGCCCTACATAAACACATGCCTAATAGAAAGGGAGTGTGATGAGATCGTGCAGA  
TTAGCGAATACAGAAGCAAAACAGCTGGGATAACTAACTCATTGAATGTCTCTGTGATC  
GGATAAGGAAAACCTGGCCGAAAAGCCTTCAGCTGGCACTAGATAACACAGGATATCACAAT  
GCAAGTGATCTATGGGATATGAGAGAAGACAATGGCAAAGATGTTGATGGTGAAATCACAG  
ATGCCTCTGAGAACAGCATTGAAACCACGATGACATTTTCTGAAGAAGCAGAATGTGATGA  
TCTCAGTGAAAACCTCTGTTGAGCTTTAGAAGGGATCCATCAGTCTTCATCTGTTTATGAAC  
CAAAGAAGGCTCGGAGCTACCAGACTGAACTTGACAGCCTGCTATCAATGGGAAAAACA  
CATTGATATGTGCCCCACAGGATCTGGAAAACTTTTGTGGCACTTCTGATTTGTGAACAC  
CATTTCCAAAACATGCCTGCAGGACAAAAGGCGAAAAGTTGTCTTTCTTGCAACTAAAGTGC  
CAGTGTACGAACAACAGAAAACCTGTATTCAAGCAGCATTTTGAAAGAAGTGGATATTCTGTT  
CAAGGAATTAGTGGTGAACAGTTGCAAATGTATCTGTAGAAAAGGTTATACAGGACAGTG  
ACATCATTGTGCTGACGCCCCAGATTCTTGTGAATGCCATCGAGGAAGGGATCCTTAGCTC  
CCTCTCCATCTTCACTCTGATGATATTTGATGAGTGCCACAACACTACGGGCAACCACCCT  
TACAATGTATTAATGACCAGATACCTGGAACAAAAATTTGACTCCTCTGCAACCAGCTGCC  
TCAGATTGTAGGTTTAACTGCTTCTGTTGGAGTTGGTAATGCCAAGAGCATCAAGGAAACC  
ATAGAGCACATCTGTACCCTCTGCTCCTACCTTGACATACAGGCCATATCCACTGTCAGAG  
AGAACAAACAGGATCTACAGAGATTTGGAAACAAGCCAGAAACATATGTCAGATGGGTTAA  
AATGCGAGTTCAGAATCACTTTGCAGACATTATCTCAGGTCTGATGTCTGAGACAGAAGTG  
TTGATGAGGACGATTTACTCAGTGGATACTATCTCCCAAATCAACAAGAATGATTTTGAAC  
ACAGAAATATGAACACTGGATAGTTGCCACTCAGAAGAAATGCAGACTGTTGCAACTGGAA  
GATAAGGAGAAGGAAAGCAGCATTGTAGAGACCTTTTCATTTGCACTGAACACCTGCGGA  
AATTCAACGATGCTCTCATCATCAGTGAAGATGCCCGCATCGAAGATGCTTTAGCCTACCT  
AACTGAATTTTTTCACAAATGTCAAAAATGGACCATATACAAAGTTAGAGAAGCAACTGACAG  
CCAAGTTTAAAGAGAAAGAACCAGAAGTACTGCCCTTTCAAAGATGAGTCAAATGAGAA  
TCCCAAGCTGGAAGAGCTTGCTTGATCCTGGACGAAGCATACCGCTATAACCCAGAGAC  
TCGCACCCTTCTGTTTGCTAAGACAAGAGCCTTAGTAGCTGCCTTGAAGAAGTGGGTAGAA  
GCAAACCCTCTACTTAGCCACATAAAGCCAGATGTGCTGATGGGTCTGGAAGAAGAGAT  
CAAAAAACAAGTATGACCCTCCCAATGCAGAAGGGGGTACTGGATGCATTCAAAACCAACA  
AAGACAGCAGACTGCTAATTGCTACATCTGTCGCTGATGAAGGCATTGATATTTCTGAATG  
CAACCTTGTTGTGCTGTATGAATACTTCGGTAATGTCACCAAAAATGATCCAAGTCAGAGGTC  
GTGGAAGGGCAAGAGACAGCAAGTGCATCCTTGTGACAAGCAAAACAGAAGTGGTTGAGA  
ATGAGAAATACAACCGTTATAAGGAAGAAATGATGAATGAAGCTATTGAGAAGCTACAGAAT  
TGGGATGAAACAACATTTGCAAGAACGATACATGACCTGCAAATGAAGGAAAAGGTATTAC  
GAGATTCCAAGAAGAAAGCAACAAGACCTAAGGTAGTGAAGGGGAAAAAAATCTTCTGTG  
TGGAATGCAAAGCATATGCCTGCAGTACAGATGACATCAGAATTATAAAGGAATCTCAC  
CACACTGTCCTAGGAGACGCATTCAAGCAGCGTTACATAACAAAGCCTCACCAGAGAGTAG  
TCCAGTTTGATTGTTTTGAGAAAAAAGCAAGATGCATTGCCAAAATACGAGTTGCCAGCAT  
GACTGGGGAATTACAGTGAAGTACAAGACACTTGATAATCTACCAGTGATCAAAATCAAAA  
GCTTTGTAGTAGAGGACGTTGAACTGGGACACAAATGGATTTTCAGAAATGGAAAAATATT  
AATTTTCTTTGAAGAATTTTGACATTGAAGAAACATCCAGTTGA

>rhea\_americana-rig1

ATGAGCGCGGAGGAGAAGCGAGGCCTGCAATGCTACCGGCGGCTCATCGAGGGCATCCT  
GAACCCCGTGTACATCCTGGGCAACATGACGGACTGGCTGGAGGATGAGGTCAGGGAGA

GGATCCGGAAGGAGGAGGAGGAGAGAGGGGTGAGGGCGGCCGCTCGCTCTTCCTCGA  
CGCGATCCTGCAGCTGCAGGCCCGGGGATGGTTCAGGGGCTTCCTCAACGCGCTGGAGG  
CAGCAGGTTACTCTGGGCTGGCAGAAGCAATTGAAAACCTGGGACTTCAGTAACTGGAAAA  
ACTGGAGTTGTATAGACAGCTGCTGAAGCGGATAGAAGCGACAATGATAGAAGTTGATCCA  
GTGGTGCTCATGCCCCACATAAACACATGCCTGATAAACAGGGAGTGTGATGAGATTCTGC  
AGATTAGCGAACACAGGAGCAAACCAGCAGGCATAACTAACTCATTGAATGTCTCTGTCTG  
ATCAGATAAGGAAAACTGGCCAAAAAGCCTGCAGATAGCACTAGACAATACAAGATATTAC  
CGCGCAAGTGAAGTATGGGATATGACGGAAGATAATAGCAAAGATGCTGACAGAGAAATG  
ATGGAGGTTTCTGAGGACAGCTTTGAACTAGTATAACATATTCTGAAGAAGGAGAATGTG  
ATAATAATCTCAGTGAAAATGTCTGTTGAGCTGCAGAAGTGATTGACCAGTCTCCACCTATT  
TATGAACCAGAGAAGGCTCGAAGTTACCAGATTGAGCTTGCACAGCCTGCTATCAATGGGA  
AAAATACAATAATAAATGCTCCTACTGGCTCCGGGAAAACCTTTGTGGCGCTTCAGATCTGT  
GATTACCATCTCCAAAACATGCCAGCAGGACGAAAGGGAAAGGTTGTCTTTCTAGCAACTA  
AAGTCCCAGTGTATGAGCAACAGAGAACTGTGTTCAAGCAGCACTTTGAAAGAAGTAGGTA  
CTCCGTTGAAGGAATCAGTGGTGAATCCATTGCACGTGTCTCTGTAGCGAAGGTTATACAG  
GACAGCGACATCATCATACTGACCCCGCAGATCCTCGTGAATAGCTTTCAGGACGGGACC  
CTTAGCTCCCTCTCCATTTTCACTCTGATGATATTTGACGAGTGCCACAACACCATGGGCAA  
CCACCCTTACAACGTGATAATGACTAAGTATCTGGAAGAAAAATTTAACTCCTCTGCAAGTC  
ATCTGCCTCAGATTGTAGGTTTAACTGCCTCCGTTGGAGTTGGTAGTGCCAAAAACACCAA  
CGAGGTGATAGAGCATATCTGCACGCTGTGCTCCTACCTGGACATACAGACCATATCCACC  
GTCAGAGAGAACATACAGGATCTGCAGAGCATCGTATACAAGCCAGAAACATATGTCAGAC  
ACATTGAAATGCGACCTCATAATCGCTTTGTGGACATTATCTCAGGTTTGATGATTCAGACA  
GAGGCACTGATGAGAACGATTTACTCAGTGGACACTGTCTCCAGATTACCTGGAATGAGT  
TTGGAACACAGAAATATGAACACTGGATAGTTAAAACCTCAGAAGAAATACAGACTGTTGCAA  
CTAGcGGATAAAGAGGAGGAGAGCAGGATTTGTAAAGCCATTTTCATTTGCACTGAACAAC  
TGAGGAAATTCAATGATGCCCTCATCATCTGTGAAGATGCCCGCACCCAAGATGCTTTAGC  
CTACCTAACAGAATTTTTTACAAATGTCAGAAATGGACCATTACAGAGTTAGAGCAGCATC  
TGACAGCCAAATTTCAAGAGAAAGAAGAGGAGCTGATTGCCCTTTCAAAGATGAATCAAA  
TGAGAATCCTAACTGGAAGAGCTTGCCAGCATCTTGATGAAGCATACCGCTATAACCCA  
CAGACCCGCACTCTTCTCTTTGCTAAGACAAGAGCCCTAGTAGCTGCTTTGAAGAAGTGGA  
TAGAAGAAAATCCTCTCCTTCGTAGCCACATAAAACCAGATGTTTTGGTGGGGCGTGGAAG  
AGCGAGACAGGAGACAGGTATGACCCTCCCAAGCCAGAAGGGTGTATTGGATGCTTTCAA  
AACCAGTAAGAACAACAACCTGCTAATTGCTACATCTGTTGCTGATGAAGGCATTGATATTG  
CCCAATGCAACCTTGTTGTGCTCTATGAATACTACGGCAATGTCATCAAAATGATCCAAGTC  
AGAGGTGCTGGAAGGGCAAGAGACAGCAAGTGCATCCTTGTGACGAGCAAAAGAGAAGTA  
GTTGAGAATGAGAAATACAACCGTTTTAAGGAAGAAATGATAAATGAAGCTATTGAAGAGCT  
CCAGAAGTGGGATGAGGCAACATTTACAAGAAAGATATATAAACTTCAAATGGAGGGAAAG  
ATGTTACGAGATTCCAAGAAGAAAGATACAAGACTAAAGATAGAGGAAGGCCAAAAAAATC  
TCCTATGTGGAAAATGTAAATCATATGCTTGCAATACAGATGACATCAGAGTCATAAAGGAA  
TCTCATCACTGTTCTTGGAGAAGCATTCAAGGAGCGTTACATAACAAAGCCTCATACAAA  
ACCATTACAGTATGATGATTTTATTAAAAAAAGCAAGATGTATTGCCAAAATACTAATTGCCA  
GCATGACTGGGGAATCATAGTGAAGTATAAGACATTTGATAATCTACCAGTGATCAAAATCA  
AAAGCTTTGTTATGGAAGATGTTGCAACTGGGACACAAAAGGATTTTCAGAAATGGAGAAA  
TGTTAATTGTTCTTTCAAATTTTTGATGTAGAAGAAATGTCTAGCTGA

>saxicola\_maurus-rig1

ATGACGGCGGAGGAGAAGCAGAACCTGCGGTGCTACCGGCGGTACATCGAGAGGAGCCT  
GAACCCCGTGTACGTCTCAGCAACATGACGGACTGGCTGTCCGACGAGGTGAAGGAGA  
GGGTCCGTAAGGAGGAGGAGAAGGGGGTGACGGCGGCCGCCGCGCTGTTCTGGATGC  
CGTGCTGCTGCTGGAGGCGGAGGGCTGGCTCCGGGGATTCTGGATGCGCTGGTGGCTG  
CAGGTTATACTGGGCTGGCAGAAGCAATTGAAAACCTGGGACTTCAGCAAGCTGGAAAACT  
GGAGCTGCACAGGCAGCTGTTGAAGCGGATAGAAGCAACAATGCTAGAAGTTGATCCTGT  
AGCAATCATGCCATATATAAACACGTGCCTGATAGAGAGAGATTGTGATGAGATCCTGCAG  
ATCAGTGAATACAGAAGCAAAGCAGCCGGGATAACCAAACCTCATTGAGTGCCTCTGTGCT  
CGGATAAGGAAAACTGGCCCAAAAGTCTTCAGCTGGCACTGGATAATGCAGGATATTACAA  
TGCTAGTGAACCTGTGGAATATAAGAGAAGAGNATGGCAAAGATGTGGATGGTGAATGACT  
GATGCTTCTGAGAATTACTTTGAAACCATGGTGACATTTTCTGAAGAAGCAGAATGTGATAA  
TCTCAGTGAAGTCTCTCTTCAGTTTCAGAAAACGCGTATGAGTCTTCATCTGTTTATAAAC  
CAAAGAAGGCCAGGAGCTATCAGATTGAGCTTGCACAGCCTGCTATTGATGGGAAAAACA  
CATTGATTTGTGCCCCACAGGATCTGGAAAACTTTTTGTGGCACTTCTGATTTGTGAACAT  
CATTTGCAAAACATTCCCTCAGGACGAAAGGCCAAAAGTTGTCTTCCTTGCAACCAAAGTGC  
CAGTGTATGAGCAACAGAAAAATGTGTTCAAGGCAGCATTTTGAAGGAGTGGATACTCTGT  
TCAAGGAATTTGTGGTGAAACAGTTGCAAATATCTCAGTAGAAAAGGTTATACAGGACAGT  
GACATCATTGTGCTAACTCCCCAGATTCTTGTGAATAGCATGGGGAAAGGGATCCTTAGCT  
CCCTCTCCATCTTCACTCTGATGATATTCGATGAGTGCCACAACACTACAGGCAACCACCC  
TTACAATGTGCTGATGACCAGATACCTGGATCAAAAATTTGACTCCTCTGCNAACCAGCTG  
CCTCAGATTGTAGGTTTAACTGCTTCTGTTGGAGTTGGCAATGCCAAAAGCACTAATGAAA  
CTGTGGAGCACATCTGTACCCTCTGCTCCTACCTTGACATACAGGCCATATCCACTGTCAG  
AGAGAACAACAAGATCTGCAGAGGTTTGGAAACAAGCCTGAAACACATATCAGATGGGTT  
AAAATGCGAGCTCAGAATCACTTTGCAGACATTATCTCAGGTCTGATGTCTGAGACAGAGG  
TGTTGATGAGGAAGATTTACTCAGTGGATAACCATCTCCCAAATCAACAAGAATTACCTTGA  
ACACAGAGATATGAACAATGGATAGTTTCCACTCAGAAGAAATGCAGACTGTTGCAACTGG  
AAGATAAGGAGAAGGAGAGCAGTATTTGTAGAGACCTGTTCAATTTGACTGAACACTTGCG  
GAAATTCAATGATGCTCTGATTATTGGTGAAGATGCCCCGATCGAAGATGCTTTGGCCTAC  
CTGAATGAATTTTTACAAATGTTAAAAATGGACCATATACAGAGTTAGAGAAGCAGCTGAC  
GGAGAAATTTCAAGAGAAAGAGCCAGAGCTGACTGCCCTTTCAAAGATGAGTCAAATGAG  
AATCCAAAGTTGGAAGAGCTTGCTTGCATCCTGGATGAAGCATACCGCTATAACCCGGAGA  
CTCGCACTATTCTCTTTGCCAAGACNAGAGCCTTAGTAGCTGCTTTGAAGAAATGGATAGA  
AGCAAACCCTGTACTTAGCCACATAAAGCCGGATGTGTTGATGGGTAGGGCAAGAAGAGA  
CCATAAAACAGGTATGACCCTGCCGATGCAGAAGGGTGTACTGGATGCATTCAGAAATGAC  
AAAGACATCAGACTGCTAATTGCTACATCTGTTGCTGATGAAGGCATTGATATTACTGAGTG  
CAACCTTGTTGGTGCTCTATGAATACTTTGGTAATGTCACCAAAATGATCCAAGTCAGAGGTC  
GTGGAAGGGCAAGAGACAGCAAGTGCATCCTTGTGACAAGCAAAACAGAAGTGGTTGAAA  
ATGAAAAACTAAACCGTTACAAGGAAGAAATGATGAATGCAGCTATTGAACAGCTACAGAA  
CTGGGATGAAACAACATTTGCGAGAACGATATGTCGCCTGCAAAGGAGGGAAAAAGGTACT  
ACGAGATTCTAAGAAGAACGAAACAAAACCCGAAGCAATGAAAGGGAAAAAAAATCTTNTG  
TGTGGAAGAAATGCAAAGTGTATGTCTGCAGTACAGATGACATCAGAATTATAAAGGAATCTCA  
TCACACTGTCCTGGGTGACACGTTCAAGGAGCGTTACATAACAAAGCCCCACAGGAAACC  
GGTTCAGTTTGATGGTTTTGTGAAAAAAGCAAGATGCATTGCCNAAATGCTGAGTGCCAG

CACGACTGGGGGATCACAGTGAAGTACAAGACATTTGATAATCTACCAGTGATCAAAATCA  
AAAGCTTTGTACTAGAGGACATTGAACTGGGACACAAATGGATTTTCAGAAATGGAAAAG  
TATTAATTTGTCTTTGAAGAATTTTGATGAAGAAACATTCAGCTGA

>scolopax\_mira-rig1

ATGACGGCGGAGGAGAAGAGGAGCCTGCGGTGCTACCGGCAGTACATCGAGAAGAGCCT  
GAACCCCGTCTACATCCTGAGCAACATGACGGAGTGGCTGTCCGACGAGGTGAAGGAGAT  
GATCCGTAAGGAAGAGGAGAAGGGGGTGACGGCTGCCGCCGCGCTGTTTCTGGATGTTG  
TCCTGCAGCTTGAGGCAGTGGGATGGTTCCGGGGCTTCATCGACGCCCTGGTGGCAGCA  
GGTTACACTGGACTGGCAGAAGCCATTGAAAACCTGGGACTTCAGCAAACCTGGAAAACTG  
GAGCCGCACAGGCAGCTGTTGAAGCGGATAGAAGCAACGATGCTAGAAGTTGATCCAGTG  
GCACTCATACCCACATATACATGTGCTTGATAGAAAGGGAGTGTGATGAGATCCTGCAGA  
TTAGTGAATACAGAAGCAAAACAGCTGGGATAACTAACTCATCGAGTGCCTCTGTGCATC  
GGATAAGGAAAACCTGGCCAAAAAGCCTGCAACTTGCCCTAGATTGCACAGGATATTATAAT  
GCAAGTGAAGTGTGGGATATGAGAGAAGATAATGGCAAATATATTGATAGTGAAATCACAG  
ATGCCTCTCAGAACAGCTTTGAAACCACGATGACATTTTCTGAAGAAGCAGAATGTGATAA  
CAATCTCAGTGAAAACCTCTGTTCTCTAGGAGGGATCGAGCAGCCTTCACCTGTTTAT  
GAACCAAAGGAGGCTCGGAGCTACCAGATTGAACTTGACAGCCTGCTATCAGCGGGAAA  
AACACAATGATATGTGCTCCACAGGATCTGGAAAACTTTTGTGGCACTTCTGATTTGTGA  
ACACCATTTCCAAAACATGCCTGCAGGACGAAAAGGGAAAGTTGTCTTTCTTGCAACTAAA  
GTGCCAGTGTATGCACAACAGAAAACCTGTATTCAAGCAGCACTTTGAAAGAAGTGGATATT  
CTGTTCAAGGAATTAGTGGTGAGACAGTTGCAAATATCTCTGTAGAAAAGGTTATACAAGAC  
AGTGACATCATTGTGCTGACGCCCCAGATTCTTGTGAATAGCATCGAGGAAGGGATCCTTA  
GCTCCCTCTCCATCTTCACTCTGATGATATTTGATGAGTGCCACAACACTACGGGCAACCA  
CCCTTACAATGTGTTAATGACAAGATACCTGGAACAAAAATTTGACTCCTCTGCAAACCAGC  
TGCCTCAGATTGTAGGTTTAACTGCTTCTGTTGGAGTTGGTAATGCCAACAACATCAAGGA  
CACAATCGAGCATATCTGTACCCTCTGCTCCTACCTTGACATACAGGCCATCTCCACTGTC  
AGAGAGAACAAAGAGGATCTGAAGAGATTGAGCAACAAGCCAGAAACACATGTCAGATGG  
GTTAAAATGCGAGCTCAGAATCACTTTGCAGACATTATCTCAGGTCTGATGTCTGAGACAG  
AAGTGTGATGAGGAGGATTTACACAGTGGATACTATCTCCCAAATCAACAAGAATGATTTT  
GGAACACAGAGATACGAACACTGGATAATTGCAACTCAGAAGAAATGCAGACTGTTGCAAC  
TGACAGATAAGGAGAAGGAGAGCAGCATTTGTAGGGACCTTTTCATTTGCACCGAACACCT  
GCGGAAACTCAATGATGCTCTCATCATCAGCGAAGATGCCCGCATTGAAGATGCTGTAGCC  
TACCTCACTGAATTTTTTCACAAATGTCAAAAATGGACCATATACAGAGTTAGAGAAGCAACT  
GACAGCCAAATTTCAAGAGAAAGAACCAGAACTGACTGCCCTTTCAAAAGACGAATCAAAT  
GAGAATCCCAAGCTGGAAGAGCTTGCGTGCATCCTGGATGAAGCATACCGCTATAACCCG  
CAGACTCGCACTCTTCTCTTTGCCAAGACAAGAGCCTTAGTAGCTGCTTTGAAGAAGTGGG  
TAGAAGCTAACCCCTCTACTTAGCCACATAAAGCCAGATGTGTTGATGGGTCGTGGAAGAAG  
AGATCAAAAAACAAGTATGACCCTCCCAATGCAGAAGGGGATACTGGATGCATTCAAAAAC  
AATAAGGACAGCAGACTGCTAATTGCTACATCTGTTGCTGACGAAGGCATTGATATTTCTG  
CATGCAACCTTGTTGTGCTCTATGAATACTTTGGTAACGTCACCAAAATGATCCAAGTCAGA  
GGTCGTGGAAGGGCAAGAGACAGCAAGTGCATCCTTGTGACAAGCAAAATAGAAGTGGTT  
GAGAATGAGAAACACAACCGTTATAAGGAAGAGATGATGAATGAAGCTATTGAGAAGCTAC  
AGAATTGGGATGAAACAACATTTACAAAAAAGATACATGACTTGCAAATAAAGGAAAAGGCA  
TTACGAGATTTTCAAGGAAGAAAGAAACAAGACCTAACGTTGCGAAAGGGGAAAAAAATCTTTT

GTGTGGAAAATGCAAAACATATGCCTGCAATACAGATGACATCAGAATTATAAAGGAATCG  
CATCACACTGTCCTAGGAGACGCGTTTCAGGGAGCGCTACATAACAAAGCCTCACCAAAAAA  
CAATCCGCTTTGATTGTTTTGAGAAAAGATGCAAGATGCACTGCCAAAATACTAGCTGCCA  
GCATGACTGGGGAATCACAGTGAAGTACAAGACATTTGATAATCTACCAGTGATCAAAATC  
AAAAGCTTTGTAGTAGAGGATGTTGAAACTGGGACACAAATGGACTTTTCAGAAATGGAAAA  
ATATTAATTTTTCTTTGAAGAATTTTGATGAAGAAACATCCAGCTGA

>serinus\_canaria-rig1

ATGACGGCGGAGGAGAAGCGGAACCTGCGGTGCTACAGGCGCTACATCGAGAGGAGCCT  
GAACCCCGTGACATCCTCAGCAACATGACGGAATGGCTGTCCGACGAGGTGAAGGAGAG  
AGTCCGAAAGGAGGAGGAGAAGGGCGTGACGGCGGCCGCGCGCTGTTCTTGATGCC  
GTGCTGCTGCTGGAGGCGGAGGGCTGGCTCCGGGGCTTTCTGGATGCCCTGGTTGCAGC  
AGGTTACACTGGACTGGCAGAAGCAATTGAAAACCTGGGACTTCAGCAAACCTGGAAAACTG  
GAGCTGCACAGGCAGCTGTTGAAGCGGATAGAAGCAACAATGTTAGAAATCGATCCTGTA  
GCAATCATGCCATACATAAACACATGCCTGATAGAGAGGGAGTGTGATGAGATCCTGCAGA  
TCAGTGAATACAGAAGCAAGGCAGCCGGGATAACTAACTCATTGAGTGCCTCTGTGCTC  
GGATAAGGAAAACTGGCCCAAAAGTCTTCAGCTGGCATTGGATAATGCAGGATATTACAAT  
GCAAGTGAAGTGTGGAATATAAGAGAAGATAATGGCAAAGACATTGATGGTGAAATGACAG  
ATGCCTCTGAGAATTACTTTGAAACCATGATGACATTTTCTGAAGAAGCAGAATGTGATAAT  
TTGAGCAAAAATCTCTCTTCAGCTTCAGAAAGCATCTATGAGTTTTTCATCTGTTTATGAACCA  
AAGAAGCCTCGGAGCTATCAGATTGAGCTTGACAGCCTGCTATTGGTGGGAAAAACACAT  
TGATTTGTGCCCCCACTGGATCTGGAAAACTTTTGTGGCACTTATGATTTGTGAACATCAT  
TTGCAAAACGTTCCCTCAGGACGAAAGGCAAAAATTGTCTTCCTTGCAACCAAAGTGCCAG  
TGTATGAGCAACAGAAAAATGTATTCAGGCAGCATTTTGAAGAAGTGGATACTCTGTTCAA  
GGAATTTGTGGTGAACAGTTGCAAATATCTCTGTAGAAAATGTTATACAGGACAGTGACAT  
CATTGTGCTAACGCCCCAGATTCTTGTGAATAGCATGGAGAAAGGGATCCTTAGCTCCCTC  
TCCATCTTCACGCTGATGATATTTGATGAGTGCCACAACACGACAGGCAACCACCCTTACA  
ACGTGTTGATGACCAGATACCTGGATCAGAAATTTGACTCCTCTGCAAACCAGCTGCCTCA  
GATTGTAGGTTTAACTGCTTCTGTTGGAGTTGGTAATGCCAAAAGCACTAATGAACTGTAG  
AGCACATCTGTACCCTCTGCTCCTACCTTGACATACAGGCCATTTCCACTGTCAGAGAGAA  
CAAAGAAGATCTGCAGAGGTTTGAAACAAGCCAGAAACACATATCAGATGGGTAAATG  
CGAGCTCAGAATCACTTTGCAGACATTATCTCAGGTCTGATGTCTGAGACAGAGGTGTTGA  
TGAAGAAGATTTACTCAGTGGATACCATCTCCCAAATCAACAAGAATTACTTTGGAACACAG  
AGATATGAACAGTGGATAGTTTCTACTCAGAAGAAATGCAGACTATTGCAACTGGAAGATAA  
GGAGAAGGAGAGCAGTATTTGTAGAGACCTTTTCATTTGTAAGTGAACACTTGCGGAAATTC  
AATGATGCTCTCATTATCAGTGAAGATGCCCGCATTGAAGATGCTTTAGCCTACCTAAATGA  
ATTTTTCATAAATGTAAAAAATGGACCATTTACAGAGTTAGAGAAGCAGCTGACGGAGAAAT  
TCCAAGAAAAAGAACTAGAGCTGACTGCCCTTTCAAAGATGAATCAAATGAGAATCCAAA  
GTTGGAAGAGCTTGCTTGCATCCTGGATGAAGCATACCACTATAACCCACAGACTCGTACT  
ATTCTCTTTGCCAAGACAAGAGCCTTAGTAGCAGCTTTGAAGAAGTGGATAGAAGGAAACC  
CTCTTCTTAGCCACATAAAGCTGGATGTGTTGATGGGTAAGGGAAGAAGAGATCAGAAAAAC  
AGGTATGACCCTGCCAATGCAGAAGGGTGTACTGGATGCATTCAGAAATGACAAAGACATC  
AGACTGCTAATTGCTACATCTGTTGCTGATGAAGGCATTGATATTACTGAGTGCAACTTTGT  
GGTGTCTATGAATACTTTGGTAATGTCACCAAAATGATCCAAGTCAGAGGTCGTGGAAGG  
GCAAGAGACAGCAAGTGCATCCTTGTGACAAGTAAAACAGAAGTGGTTGAGAATGAAAAAC

TAAACAGTTACAAGGAAGAAATGATGAATGCAGCTATTGAAAAGCTACAGAACTGGGATGA  
AACAACATTTGCAAGAAAGATACGTGGCCTGCAAATGAAGGAAAAGATGCTACGAGATTCC  
AGGAAGAACAAAACAAAACCTGAAATAGTGGAAGGGAAAAAAATCTTTTGTGTGGAAAAT  
GCAAAGCATATGTCTGCAGTACAGATGACATCAGAATTATAAAGGATTCTCATCACACTGTC  
TTAGGTGACGCGTTCAAGGAGCGTTATACAACAAAGCCCCACAGGAAACCTTTTCAGTTTG  
ATGGTTTTGAGAAAAAAGCAAGATGCATTGCCGAAATACTGAGTGCCAGCATGACTGGGG  
GATCATAGTGAAGTACAAGATATTTGACAATCTACCAGTGATCAAAATCAGAAGCTTTGTAC  
TAGAGGATGTTGAAACTGGGACACAAATGGATTTTCAGAAATGGAAAAGTATTAATTTGTCT  
TTGAAGAAGTTTGATGAAGAAACATCCAGCTGA

>setophaga\_coronata-rig1

ATGACGGCGGAGGAGAAGCGGAACCTGCAGTGCTACAGGCGCTACATCGAGAGGAGCCT  
GAACCCCGTGACATCCTCAGCAACATGACGGAATGGCTGTCCGACGAGGTGAAGGAGAG  
AGTCCGAAAGGAGGAGGAGAAGGGCGTGACGGCGGCCGCGCTGTTCTTGATGCC  
GTGCTGCTGCTGGAGGCGGAGGGCTGGCTCCGGGGCTTTCTGGATGCCCTGGTTGCAGC  
AGGTTACACTGGACTGGCAGAAGCAATTGAAAAGTGGGACTTCAGCAAAGTGGAAAACTG  
GAGCTGCACAGGCAGCTGTTGAAACGGATAGAAGCAACAATGCTAGAAATCGATCCTGTA  
GCAATCATGCCATACATAAACACATGCCTGATAGAGAGGGAGTGTGATGAGATCCTGCAGA  
TCAGTGAATACAGAAGCAAGGCAGCCGGGATAACGAAACTCATTGAATGCCTCTGTGCTC  
GGATAAGGAAAAGTGGCCCAAAAGTCTTCAGCTGGCATTGGATAATGCAGGATATTACAAT  
GCAAGTGAAGTGTGGAATATAAGAGAAGATAATGGCAAAGACATTGATGGTGAAAAGACAG  
ATGCCTCTGAGAATTACTTTGAAACCATGATGACATTTTCTGAAGAAGCAGAATGTGATAAT  
CTGAGCAGAAATCTCTCTTCAGTTTCGGAAAGCATCTATGAGTCTTCATCTGTTTATGAACC  
AAAGAAGGCTCGGAGCTACCAGATTGAGCTTGCACAGCCTGCTTTTGATGGGAAAAACACA  
TTGATTAATGCCCCCACNNGATCTGGAAAACTTTTGTGGCACTTATGATTAGTGAACATCA  
CTTGCAAAATGTTCCCTCAGGACGAAAGGCAAAAATTGTGTTCCCTTGCAACCAAAGTGCCT  
GTGTATGAGCAGCAGAAAAATGTATTCAGGCAGCATTTTGAAAGAAGTGGATACTCTGTTC  
AAGGAATTTGTGGTGAAACAGTTGCAAATATCTCTGTAGAAAATGTTATACAGGACAGTGAC  
ATCATTGTGCTAACGCCCCAGATTCTTGTAATAGCATGGAGAAAGGGATCCTTAGCTCCC  
TCTCCATCTTCACTCTGATGATATTTGATGAGTGCCACAACACTACAGGCAACCACCCTTAC  
AATGTGTTGATGACCAGATACCTGGATCAAAAATTTGACTCCTCAGCAAACCAGCTGCCTC  
AGATTGTAGGTTTGACTGCTTCTGTTGGAGTTGGTAATGCCAAGAGCACTAATGAACTGT  
AGAGCACATCTGTACCCTCTGCTCCTACCTTGACATACAGACCATATCCACTGTCAGAGAG  
AACAAAGAAGATCTGCAGAGGTTTGAAACAAGCCAGAAACACATATCAGATGGGTAAAA  
TGCGACCTCAGAATCACTTTGCAGACATTATCTCAGGTCTGATGTCTGAGACAGAAGTGT  
GATGAGGAAGATTTACTCAGTGGATACCATCCCCCAAATCAACAAGAATTACTTTGGAACA  
CAGAGATATGAACAGTGGATAGTTTCCACTCAGAAGAAATGCAGACTATTGCAACTGGAAG  
ATAAGGAGAAGGAGAGCAGTATTTGTAGAGACCTTTTCATTTGTAAGTGAACACTTGCGGAA  
ATTCAACGATGCTCTCATTATCAGTGAAGATGCCCGCATTGAAGATGCTTTAGCCTACCTAA  
ATGAATTTTTCACAAATGTAAAAAATGGACCATTTACAGAGTTAGAGAAGCAGCTGACAGAG  
AAATTTCAAGAGAAAGATCAAGAGCTGACTGCCCTTTCTAAAGATGAGTCAAATGAGAATCC  
AAAGTTGGAAGAGCTTGCTTGATCCTGGATGAAGCATACCACTATAACCCAGAGACTCGC  
ACTATTCTCTTTGCCAAGACAAGAGCCTTAGTAGCTGCTTTGAAGAAGTGGATAGAAGGAA  
AGCCTCTTCTTAGCCACATAAAGCCGCATGCGTTGATGGGTAAAGGGAAGAAGAGATCAGA  
AAACAGGTATGACCTTGCCAATGCAGAAGGATGTACTGGATGCATTGAGAAATGACAAAGA



CGTCAGACTGTTAATTGCTACATCTGTTGCTGAAGAAGGCATTGATATTATTGAGTGCAACC  
TTGTGGTGCTCTATGAATACTTTGGAAATGTCACCAAATGATCCAAGTCAGAGGTCGTGG  
AAGGGCAAGAGACAGCAAGTGCATCCTTGTGACAAGTAAAACAGAAGTGTTGAGAATGA  
AAAATAAACAGTTACAAGGAAGAAATGATGAATGCAGCTATTGAAAACTACAGAACTGG  
GATGAAACAACATTTGCAAGAAAGATACGTGGCCTGCAAATGAAGGAAAAGATGCTACGAG  
ATTCCAGGAAGAACAACAAAAGAAGAAATAGTAGAAGGGAAAAAAATCTTTTGTGTGG  
AAAATGTAAAGCATATGTCTGCAGTACAGATGACATCAGAATTATAAAGGAATCTCATCACA  
CTGTCTTAGGTGATGCGTTCAAGGAGCGTTATACAACAAAGCCCCACAGGAAACCTTTGCA  
GTTTGATGGTTTTGAGAAAAAAGCAAGATGCATTGCCGAAATACTGAGTGTCAGCATGAC  
TGGGGGATCATAGTGAAGTACAAGATATTTGATAATCTACCAAGTGATCAAAATCAGAAGCTT  
TGTAAGTAGAGGATGTTGAAACAGGGACACAAACGGATTTTCAGAAATGGAAAAGTATTAATT  
TGTCTTTGAAGGAGTTTGATGAAGAAACATCCAGCTGA

>strigops\_habroptila-rig1

ATGACGGCGGAGGAGAAGAGGAACCTGCAGTGCTACAGGCGGTACATCGAGAAAAGCCT  
GAACCCCGTCTACATCCTGAGCAACATGACGGCCTGGCTGTCGGACGAGGAGAAGGAGC  
GAGTCCGTAAGGAGGAGGAGAAGGGGGTGAAGTGCAGGCCGCCGCGCTCTTCCTGGATACC  
ATCCTGCTGCTGGAGGCGGACGGCTGGCTTCGGGGCTTCCTGGATGCCCTGATTGCAGC  
AGGTTACACTGGGCTGGCAGAAGCAATTGAAAACCTGGGACTTCAGCAAACTGGAAAACT  
GGAGTTGCACAGACAGCTGTTGAAGCGGATAGAAGCAACTATGCTAGAAATTGATCCAGTA  
GCACTCATGCCTTACATAAACACATGCCTGATAGAAAGGGAGTGTGATGAGATCCTGCAGA  
TTAGTGAATACAGAAGCAAAGCAGCCGGGATAACTAACTCATTGAATGTCTCTGTGATC  
GGATAAGGAAAACCTGGCCAAAAAGACTTCAGCTGGCACTGGATAATACAGGATATTACAAT  
GCAAGTGAAGTGTGGGATATGAGAGAAGATAATGGCAAAGATGTTGATGGTGAAATGACAG  
ATGCCTGTAAGAACAGCTTTGAAACCACAATGACGTTTTCTGAAGAGGCAGAATGTGATAA  
TATTCTCAGTGAAAACCTCTGTTTCAGGTTTCAGAAGAGGTCTATCAGTCTTCATCTCTTTATG  
AACCGAAGAGGGCTCGGAGCTACCAGACTGAACTTGCACAGCCTGCTATCAATGGGTATA  
ACACATTGATATGTGCCCCACAGGATCTGGAAAACTTTTTGTGGCACTGATGATTTGTGA  
ACACCATTTCCAAAACATGCCCTCAGAACGAAAGGCCAAAAGTTGTCTTTCTTGCAACCAAA  
GTGCCAGTGTATGAACAACAGAAAAATGTATTCAAGCAGCACTTTGAAAGAAGTGGATATT  
CTGTTCAAGGAATTTGTGGTGAACAGTTGCAAATGTCTCTGTAGAAAAGGTTATACAGGAT  
AGCGACATCGTTGTGCTAACACCCCAAGATTCTTGTGAATAGCATCGAAGAAGGGATCCTTA  
GCTCCCTCTCCGTCTTCACTCTGATGATATTTGATGAGTGTCACAACACTATGGGCAACCA  
CCCTTACAACGTGTTAATGACCAGATACCTGGAACAAAAATTTGACTCCTCTTCAAACCAGC  
TACCTCAGATTGTAGGTTTAACTGCTTCTGTTGGAGTAGGTAATGCCAAGACCATCAAGGA  
ACAATAGAGTATATCTGTACCGTCTGCGCCAACCTTGACATACAGGCCATATCTACTGTCA  
GAGAGAACAACAAGATCTGCAGAAATTTGGAAACAAGCCAGAAATAGATGTCAGATGGGT  
GAAAATGAGAGCTCGAAATCACTTTGCAGACATTGTCTCAGGCCTGATGTCTGAGACAGAG  
GCATTGATGAGGAACAATTACTCCGTGGATACTATCTCCAGATCAACAAGAGTGATTTTG  
GAACACAGAAATGTGAACAGTGGATAGTTGCCACTCAGAAGAAATGCAGACTGTTGAACT  
GGCAGATAAGGAGAAGGAGAGCAGCATTGTAGAGACCTTTTCATTTGCACTGAACACCTG  
CGGAAATTCAATGATGCTCTCATCATCAGTGAAGATGCCCGCATTGAAGATGCTTTAGCCT  
ACCTAACTGATTTTTTTCAGAAATGTCAGAAATGGACCATATACAGAGCTAGAGAAGCAACTT  
ACAGCCAAATTTCAAGAGAAAGAACCAAACTGACTGCCCTTTCAAAGACGAATCAAATG  
AGAATCCCAAGCTGGAAGAGCTTGCCTGCATCCTGGATGAAGCATACCACTATAACCCACA

GACTCGCACTATTCTCTTTGCTAAGACAAGAGCCTTAGTAGCTGCTTTGAAGAAGTGGATA  
GAAGCAAACCCTCTATTTAGCCACATACAGCCAGGTATATTGATGGGTCATGGAAGAAGAG  
ATCAAAAAACAGGTATGACCCTCCCGATGCAGAAGGATGTACTGGATGCATTCAAAACCAA  
CAAAGACACCAGATTGCTAATTGCTACTTCTGTTGCTGATGAAGGCATTGATATTTCTGAGT  
GCAACCTTGTTGTGCTCTATGAATACTTCGGTAATGTCACCAAAATGATCCAAGTCAGAGGT  
CGTGGAAGGGCTAAAGACAGCAAGTGCATCCTCGTGACAAACAAAACAGAAATGGTTGAG  
AAAGAGAAACACAGCCGTTACAAGGAAGAAATGATGAATGAAGCTGTTGAAAAGCTACAGA  
ATTGGGATGAAAGAACATTTGCAAGAAAGATACATGATGTGCAAATGAAGGAAAAGGTATT  
ACGAGATTCCAGGAAGAAAGAAACGCGATATAAGGTAGTGGAAGGGGAAAAAAATCTTCTG  
TGTGGAATGCAAAGCATATGCCTGCAGTACAGATGACATCAGAATTATAAAGGAATCTC  
ATCACACTGTCTAGGAGATGCATTCAAGGAGCGATATATAACAAAGCCTCACCATAAACC  
AATCCAGTTTGATTGTTTTGAGAAAAAAGCAAGATGCATTGCCAAAATACTAACTGCCAGC  
ATGACTGGGGAATCATAGTGAAGTACAGGACATTTGATAATCTACCAGTGATCAAAATCAAA  
AGCTTTGTAGTAGAGAACATTGAACTGGGACACAAATGGATTTTCAGAAATGGAAAGATCT  
TAATTTTTCTCTGAAGAATTTTGATGCTGAAGAAATGTCCAGCTGA

>sporophila\_hypoxantha-rig1

ATGACGGCGGAGGAGAAGCGGAACCTGCGGTGCTACAGGCGCTACATCGAGAGGAGCCT  
GAACCCCGTGACATCCTCAGCAACATGACGGAATGGCTGTCCGACGAGGTGAAGGAGAG  
AGTCCGAAAGGAGGAGGAGAAGGGCGTGACGGCGGCCCGCGCTGTTCTTGATGCC  
GTGCTGCTGCTGGAGGCGGAGGGCTGGCTCCGGGGCTTTCTGGATGCCCTGGTTGCAGC  
AGGTTACACTGGACTGGCAGAAGCAATTGAAAAGTGGGACTTCAGCAAAGTGGAAAACTG  
GAACTGCACAGGCAGCTGTTGAAGCGGATAGAAGCAACAATGCTAGAAATTGATCCTGTAG  
CAATCATGCCATACATAAACATGTGCCTGATAGACAGGGAGTGTGATGAGATCCTGCAGAT  
CAGTGAATACAGAAGCAAGGCAGCTGGGATAACAAAAGTCAATTGAATGCCTCTGTGCTCG  
GATAAGGAAAAGTGGCCCAAAGTCTTCAGCTGGCATTGGATAATGCAGGATATTACAATG  
CAAGTGAAGTGTGGAATATAAGAGAAGATAATGGCAAAGACATTGAYGGTGAATGACAGA  
TGCCTCTGAGAATTACTTTGAAACCATGATGACATTTTCTGAAGAAGCAGAATGTGATAATC  
TGAGCAAAAATCTCTCTTCAGTTTCAGAAAGCATCTATGAGTCTTCATCTGTTTATGAACCA  
AAGAAGGCTCGGAGCTACCAGACTGAGCTTGCACAGCCTGCTTTTGATGGGAAAAACACA  
TTGATTTGTGCCCCACAGGCTCTGGAAAACTTTTGTGGCACTTATGATTTGTGAACATCA  
CTTGCAAAACGTTCCCTCAGGACGAAAGGCAAAAGTTGTCTTCCTTGCAACCAAAGTGCCA  
GTGTATGAGCAACAGAAAAATGTATTCAGGCAGCATTTTGAAGAAGTGGATACTCTGTTCA  
AGGAATTTGTGGTGAAACAGTTGCAAATATCTCTGTAGAAAATGTTATACAGGACAGTGACA  
TCATTGTGCTAACGCCCCAGATTCTTGTGAATAGCATGGAGAAAGGGATCCTTAGCTCCCT  
CTCCATCTTCACTCTGATGATATTTGATGAGTGCCACAACACTACAGGTAACCAACCTTACA  
ATGTGTTGATGACCAGATACCTGGATCAAAAATTTGACTCCTCTGCAAACAGCTGCCTCA  
GATTGTAGGTTTAACTGCTTCTGTTGGAGTTGGTAATGCCAAGAGCACTAATGAACTGTA  
GAGCACATCTGTACCCTCTGCTCCTACCTTGACATACAGGCCATATCCACTGTCAGAGAGA  
ACAAAGAAGATCTGCAGAGATTTGAAACAAGCCAGAAACACATATCAGATGGGTTAAAT  
GCGAGCTCAGAATCACTTTGCAGACATTATCTCAGGTCTGATGTCTGAGACAGAAGTGTTG  
ATGAGGAAGATTTACTCAGTGGATTCCATCTCCCAAATCAGCAAGAATTACTTTGGAACACA  
GAGATATGAACAGTGGATAGTTTCTACTCAGAAGAAATGCAGATTARTGCAACTGGAAGAT  
AAGGAGAAGGAGAGCAGTATTTGTAGAGATCTTTTCATTTGTAAGTGAACACTTGCGGAAAT  
CAACGATGCTCTCATTATCAGTGAAGATGCCCGCATCGAAGATGCTTTAGCCTACCTAAAT

GAATTTTTCACAAATGTAAAAAATGGACCATTTACAGAGTTAGAGAAGCAGCTGACGGAGA  
AATTTCAAGAGAAAGAACAAGAGCTGACTTCCCTTTCAAAGATGAGTCAAATGAGAATCCA  
AAGTTGGAAGAGCTTGCTTGCATCCTGGATGAAGCATACCACTATAACCCAGAGACTCGCA  
CTATTCTCTTTGCCAAGACAAGAGCCTTAGTAGCTGCTTTGAAGAAGTGGATAGAAGGAAA  
CCCTCTTCTTAGCCACATAAAGCCAGATGTGTTGATGGGTAAAGGAAGAAGAGATCAGAAA  
ACAGGTATGACCTTGCCAATGCAGAAGGGTGTACTGGATGCATTGAGAAATGACAAAGACA  
TCAGACTGCTAATTGCTACATCTGTTGCTGACGAAGGCATTGATATTACTGAGTGAACCTT  
GTGGTGCTCTATGAATACTTTGGAAATGTCACCAAATGATCCAAGTCAGAGGTCGTGGAA  
GGGCAAGAGACAGCAAGTGCATCCTTGTGACAAGCAAAACAGAAGTGGTTGAGAATGAAA  
AACGAAACAGTTACAAGGAAGAAATGATGAATGCAGCTATTGAAAAGCTACAGAACTGGGA  
TGAAACAACATTTGCGAGAAAAGATACATGGCCTGCAAATGAAGGAAAAGATGCTACGAGAT  
TCCAGGAAGAACAAAACAAAACAAAGAAATAGTAAAAGGGAAAAAAAATCTTTTGTGTGGAAA  
ATGCAAAGCATATGTCTGCASTACAGATGACATCAGAATTATAAAGGAATCTCACCATACTG  
TCTTAGGTGATGCGTTCAAGGAGCGTTATACAACAAAGCCCCACAGGAAACCTTTTCAGTT  
TGATGGTTTTTGAGAAAAAAGCAAGATGCATTGCCGAAATACTGAGTGTGAGCATGACTGG  
GGGATCATAGTGAAGTACAAGATATTTGATAATCTACCAGTGATCAAAATCAGAAGCTTTGT  
ACTAGAGGATGTTGAAACAGGGACACAAATGGATTTTCAGAAATGGAAAAGTATTAATTTGT  
CTTTGAAGGAGTTTGATGAAGAAACATACAGCTGA

>sterna\_hirundo-rig1

ATGACCGCGGAGGAGAAGAGGAGCCTGCAGTGCTACCGGCGGTACATCGAGAGGAGCCT  
GAACCCCGTCTACATCCTGAGCAACATGACGGAGTGGCTGTCCGACGAGGTGGAGGAGA  
GAGTGCGGAAGGAAGAGGAGAAGGGGGTGACGGCGGCCGCCGCGCTGTTTCTGGATGC  
CATCCTGCAGCTGGAAGTGGAGGGATGGCTCCGGGGCTTCATCGACGCCCTGGTTGCAG  
CAGGTTACACAGGACTGGCAGAAGCAATTGAAAAGTGGGACTTCAGCAAAGTGGAAAAGTT  
GGAGCCGCACAGACAGCTGTTGAAGCGGATAGAAGCAACGATGCTTGAAATTGATCCGGT  
AGCACTCATGCCTTATGTAAACACGTGCCTGATAGAAAGGGAGTGTGATGAGATCCTGCAG  
ATTAGCGAATACAGAAGCAAAACAGCTGGGATAACTAACTCATTGAATGTCTCTGTCGATC  
GGATAAGGAAAAGTGGCCGAAAAGCCTTCAACTGGCACTAGATAACACAGGATATTACAAAT  
GCAAGTGAAGTGTGGGATATGAGAGAAGATAATGGCAAAGATGTTGATGGTGAAATCACAG  
ATGCCTCTGAAAACACCTTTGAAACCACTATGACATTCTTTGAAAAGCAGAATTTGATAAT  
AATCTCAGTGAAAATCTCTGTTGAGCTTTAGAAGGGATCGATCAGCCTTCACCTCTTTATGA  
ACCAAAGAAGGCTCGGAGCTATCAGATTGAACTTGCGCAGCCTGCTATCAATGGGAAAAAC  
ACAGTGATATGTGCCCCACCGGATCTGGAAAACTTTTGTGGCACTTATGATTTGTGAAC  
ACCATTTCCAAAATATGCCTGCAGGACGAAAGGCGAAAGTTGTCTTCCCTTGCAACTAAAGT  
GCCAGTGTACGAACAACAGAAAACTGTATTCAAACAGCATTTTGAAGAAATGGATATTCTG  
TTCAAGGAATTAGTGGTGAAACAGCTGCAAATGTCTCTGTAGAAAAGATTATACAGGACAG  
TGACATCATTGTGCTGACGCCCCAGATTCTTGTGAATAGCTTTGAGGAAGGGATCCTTAGC  
TCCCTCTCCATCTTCACTCTGATGATATTTGATGAGTGCCACAGCACTACAGGCAACCACC  
CTTACAATGTGTTAATGACCAGATACCTGGAACAAAATTTGACTCCTCTGCAAACCAGCTG  
CCTCAGATTGTAGGTTTAACTGCTTCTGTTGGAGTTGGTAATGCCAAGAGCATCAAGGAAA  
CGATTGAGCACATCTGTACCCTCTGCTCCTACCTTGACATACAGGCCATATCCACTGTCAG  
AGAGAACAAACAGGATCTGCAGAGATTGAGAAACACTCCAGAAACACATGTCAGATGGGTT  
AAAATGCGAGTTCAGAATCACTTTGCAGACATTATCTCAGGTCTGATGTCTGAGACAGAAAT  
GTTGATGAGGAAGATTTACTCCGTGGATACTGTCTCCCAAATCAACAAGAATGATTTTGGAA

CACAGAAATATGAACACTGGATAGTTGCAACTCAGAAGAAATGCAAACTGTTGCAACTGGC  
AGACAAGGAGAAGGAGAGCAGCATTTGTAGAGACCTTTTCATTTGCACTGAACACCTGCGG  
AAATTC AACGATGCTCTCATCATCAGTGAAGATGCCCGCATCGAAGACGCTTTAGCCTACC  
TCACTGAATTTTTACAAATGTCAAAAACGGACCCTATACAGAGTTAGAGAAGCAACTGACA  
GCCAAATTTCAAGAGAAAGAACCAGAACTGACTGCCCTTTCAAAGACGAATCAAATGAGA  
ATCCCAAGCTGGAAGAGCTTGCTTGCATCCTGGATGAAGCATACCACTACAACCCAGAGAC  
TCGCACTCTTCTCTTTGCTAAGACAAGAGCCTTAGTAGCTGCTTTGAAGAAGTGGGTAGAA  
GCAAACCCTCTACTTAGCCACATAAAACCAGATGTGTTGATGGGTCGTGGAAGAAGAGATC  
AAAAACAAGTATGACCCTCCCAATGCAGAAGGGGATACTGGATGCATTCAAAACCAACAA  
AGACAGCAGACTGCTAATTGCTACGTCAGTTGCTGATGAAGGCATTGATATTTCTGAATGC  
AACCTTGTTGTGCTCTATGAATACTTCGGTAATGTCACCAAAATGATCCAAGTCAGAGGTGCG  
TGGAAGGGCAAGAGACAGCAAGTGCATCCTTGTGACAAGCAAAACGGAAGTGGTTGAGAA  
TGAGAAACACAACCGTTATAAGGAAGAAATGATGAATGAAGCTATTGAGAAGCTACAGAAT  
TGGGATGAAGCAACATTTGCAAGAAAGATACATGACCTGCAAATGAAAGAAAAGGTATTAC  
GAGATTCCAGGAAGAAAGAAACAAGACCTAAGGTAGTGAAGGGAAAAAAATCTTCTTTG  
TGAAAAATGCAAAGCGTATGCCTGCAGTTCAGATGACATCAGAATTATAAAGGAATCACAT  
CACACTGTCCTAGGAGACGCATTCAAGGAGCGCTACATAACAAAGCCTCACCATAAAGCAA  
TCCGGTTTGATTGTTTTGAGAAAAAAGCAAGATGCATTGCCAGAATACTAGTTGCCAGCAT  
GACTGGGGAATCATAGTGAAGTACAAGACATTTGATAATCTACCAGTGATCAAAATTTAAAG  
CTTTGTAGTAGAGGATGCTGAACTGGGACACCAATGGATTTTCAGAAATGGAAAAATATTA  
ATTTTTCTTTGAAGAATTTTGATGAAGAAATGTCCAGCTGA

>strix\_occidentalis-rig1

ATGACCGCGGAGGAGAAGAGGAACCTGCAGCGCTGCAGGCGGTACATCGAGAGGAGCCT  
GAACCCCATCTACGTCCTGAGCAACATGACGGACTGGCTGTCCGACGATGTGAAGGAGAG  
AGTCCGGAAGGAGGAGGAGAAGGGGGTGACGGCGGCCGCCGCGCTGTTTCTGGACGCC  
GTCCTGCAGCTGGAGGCGCAGGGCTGGCTCCGGGCCTTCCTGGACGCCCTGGTTGCAGC  
AGGTTACACTGGACTGGCAGAAGCAATTGAAAACCTGGGACTTCAGCAAACTGGAAAACTG  
GAGTTGCACAGACAGCTCTTGAAGCGCATAGAAGCAACAATGCTAGAAGTTGATCCAGTAG  
CACTCATGCCTTACATAAACATGTGCCTGATAGAAAGGGAGTGTGATGAGATCCTGCAGAT  
TAGCGAATACAGAAGCAAAGCAGCTGGGGTAATACTAACTCATTGAATGCCTCTGTGATCG  
GATAAGGAAAACTGGCCGAAAAGCCTTCAGCTGGCACTAGATAATGCAGGATATTACAATG  
CAAGTGAACCTGTGGGATATGAGAGAAGATAATGGCAAAGATGTTGATGGTGAAATGACAGA  
CGTCTCTGAGAACAGCTTTGAAACCACAATTACGTTTTTTGAAGAAGCAGAATGTGATAATA  
ATCTCAGTGAAAATCTTTGTTTCAGCTTCAGAAGGGACCTGTCAGTCTTCACCTGTTTATGAA  
CCAAAGAAGGCTTGAGACTACCAGACTGAACTTGACAGCCTGCTATCAATGGGAAAAACA  
CATTGATATGTGCCCCACAGGATCTGGAAAAACATTTGTTGCACTTTTGATTTGTGAACAC  
CATTTCCAAAACATGTCCTCAGGACAAAAAGCAAAAGTTGTCTTTCTTGCAACCAAAGTGCC  
AGTGTATGAACAACAGAAAAATGTATTCAGGCAGCATTTTGAAAGAAGTGGATATTCTGTTT  
AAGGAATTAGTGGTGAAACAGTTGCAAATGTTTCTGTAGAAAAGTTATACAGGACAGTGA  
CATCATTGTGCTAACACCCCAGATTCTTGTTGAATAGCATTGAGGAGGGGATCCTTAGCTCC  
CTCTCCATCTTCACTCTGATGATATTTGATGAGTGCCACAACACCACGGGCAATCACCTTA  
CAATATGTTAATGACCAGATACCTGCAACAAAAATTTGACTCCTCTGCAAGCCAGCTGCCTC  
AGATTGTAGGTTTAACTGCTTCTGTTGGAGTTGGTAATGCCAAGAGTGTCAAGGAAACGAT  
AGAGCACATCTGTACCCTCTGCTCCTACCTTGACATACAGGCCCTGTCCACTGTCAGAGAG

AACAAAGAGGATCTGCAGAGATTCAGAAACAAGCCAGAAACATATGTCAGATGGGTTAAAA  
TGCGAGTTCAGAATCACTTTGCAGACATTATCTCAGGTCTGATGTCAGAGACAGAGGCGTT  
GATGAGGAAGATTTACTCAGTGGATACTATCTCCCAAATGAACAAGAACGATTTTGAACA  
CAGAAATATGAACACTGGATAGTTGCCACTCAGAAAAAATGCAGGCTGTTGCAACTGGCAG  
ATAAGGAGAAGGAGAGCAGCATTGTAGAGACCTTTTCATTTGCACTGAGCACCTGCGGAA  
ATTCAATGATGCTCTCATCATCAGTGAAGACGCCCCGCATCGAAGATGCTTTAGCTTACCTAA  
CTGAATTTTTACAAATGTTAAAAATGGACCATATACAGAATTAGAGGAGCAACTAACAGCC  
AAATTTCAAGAGAAAGAACCAGAACTGACTTCCCTTTCAAAGATGAATCAAATGAGAATCC  
CAAGCTGGAAGAGCTTGCTTGCACTCTGGATGAAGCATACCGCTATAACCCACAGACTCG  
CACTCTTCTCTTTGCTAAGACAAGAGCCTTAGTAGCTGCTTTGAAGAAGTGGATAGAAGCA  
AACCTCTGCTTAGCCACATAAAGTCAGATGTCTTGATGGGTCGTGGAAGAAGAGATCAAA  
AAACAGGTATGACCCTCCCAATGCAGAAGGGTGTACTGGATGCATTCAAACCAACAAAGA  
CAGCAGACTGCTAATTGCTACCTCTGTTGCTGACGAAGGCATTGATATTTCTGAGTGCAAC  
CTTGTTGTGCTCTATGAATACTTTGGTAATGTCACCAAATGATCCAAGTAAGAGGTCGTGG  
AAGGGCAAGAGGTAGCAAGTGCATCCTTGTGACAAGCAAAACAGAAGTGGTTGAGAATGA  
GAAACACAACCGTTACAAGGAAGAAATGATGAATGAAGCTATTGAAAAGCTACAGAATTGG  
GATGAAACAACATTTGCAAGAAAGATACATGACCTGCAAATGAAGGAAAAGGTATTACGAG  
ATTCCAGGAAGAAAGAAACAAGACGTACAGTAGTGAAGGGGAAAAAATCTTCTGTGTGG  
AAAATGCAAAGCATATGCCTGTAGTACAGATGACATCAGAGTTATAAAGGAATCTCATCACA  
CTGTCCTAGGAGATGCATTCAAGGAGCGTTACATAACAAAGCCTCACCAGAAACCAGTCCA  
GTTTGATTGTTTTGAGAAAAAAGCAAGATGCATTGCCAAAATACTAACTGCCAACATGACT  
GGGAATCATAGTGAAGTACAAGACATTTGATAACCTACCAAGTATCAAAATCAAAGCTTT  
GTAGTAGAGAACGTTGAAACTGGGACACAAATGGAAGTTCAGAAATGGAAAAATATTAATTT  
TTCTTTGAAGAATTTTGATGTTGAAGAAACATCCAGCTGA

>struthio\_camelus-rig1

ATGACGGCGGTGGAGAAGTGGAGCCTGCGGTGCTACCGGCGGCTCATCGAGAGCACCCCT  
CAACCCGCTCTACATCTTGGGTAACATGACCGACTGGCTCTCTGACGAGGTCAGAGAGAG  
GATTCGGAAGGAGGAAGAAAAGGGGGTATGGCAGCCGCGACGCTCTTCCTGGATGTGG  
TCCTGCAGCTCGAGAGCCArGGCTGGTTCAGGGGCTTCCTCAACGCGCTGGCGGGCGGCA  
GGTTACACTGGGCTGGCAGAAGCAATTGAAACCTGGGACTTCAGCAAACCTGGAAAACTG  
GAGTTGCACAGACAGCTGCTGAAGCGGATAGAAGCGACAATGATAGAAATTGATCCGGTA  
GTGCTCATCCCCACATAAACACGTGCCTGATAGACCGGGAGTGTGACGAGATTCTGCAG  
ATTAGTGAACACAGGAGCAAACCAGCAGGCATAACTAACTCATTGAATGTCTCTGTGAT  
CAGATAAGGAAGACTGGCCGAAAAGCCTGCAGCTAGCACTAGATAACACAGGATATTACC  
GTGCAAGTGAAGTATGGGACATGACAGAGGATAATGGCAAAGGTGTTGATCGTGAACCGA  
TGAATGTTTCTGAGGACAGCTTTGAACTAGTATAAGTTATTCTGAAGAAGGAGAATGTGAT  
AATAATCTCAGTGAATAATTTCTGTTCAAGTTCAGAAAGTGAATGACCAGTCTCCACCTATTTAT  
GAACCAAAGAAGGCTCGAAGTTACCAGATTGAGCTTGACAGCCTGCTATCAATGGGAAAA  
ATACAATAATATGTGGCCCTACTGGCTGTGGAAAAACCTTTGTGGCACTTCTGATCTGTGAA  
CACCATCTCCGAAACATGCCTGCAGGGCGAAAGGGGAAGGTTGTCTTCCTAGCAACGAAA  
GTCCCAGTGTATGAGCAACAAGAAAAACGTATTCAAGCAGCATTGTTGAAAGAAGTGGCTACT  
CCGTTGAAGGAATTAGTGGTGAAACCATTGCACGGGTCTCTGTAGAGAAGGTTATACAGGA  
CAGTGACATCATCGTACTGACGCCCCAGATTCTCGTGAATAGCTTTCAGGACGGGACCCTT  
CACTCCCTCTCCATTTTCACTCTGATGGTGTTTGATGAGTGCCACAACACTACGGGCAACC

ACCCTTACAACGTGTTAATGACTAAATATCTGGAACAAAAATTTGACTCCTCTGCAAATCAG  
CTGCCACAGATTGTAGGTTTAACTGCCTCTGTTGGAGTCGGTAGCGCCAAGAACACCGAG  
GAGGTGACAGAGCATATCTGTACGCTGTGCTCCTACCTGGACATACAGACCATATCCACCG  
TCAGAGAGAACATACAGGATCTGCAGAGCATCGTATTCAAGCCAGAAACACATGTCAGACA  
GGTTAAATGCGACTTCAGAATCACTTTGTGGACGTTATCTCAGGTTTGATGGCTGAGACA  
GAGGCGCTGATGAGAACGATTTACTCAGTGGATACTGCCACCCAAATTACCCGGAATGATT  
TCGGGACACAGAAATACGAACACTGGATAGTTGAAACTCAGAAGAAATGCAGACTGTTGCA  
ACTACCTGACAAGGAAGAGGAGAGCAGGATTTGTAGAGCCCTCTTCATTTGCACTGAGCAC  
CTAAGGAAATTCAACGATGCCCTCATCATCTGTGAAGATGCCCGCATCCAAGATGCTTTAG  
CCTACCTAACTGAATTTTTTACGAATGTCAAAAATGGACCATTACAGAGTTAGAGCAGCAT  
CTGACAGCCAAATTTCAAGAGAAAGAAGAGAAGCTGACTGCCCTTTCAAAGATGAATCAA  
ATGAGAATCCTAACTGGAAGAGCTTGCCAGCATCTTGGATGAAGCATACCGCTATAACCC  
ACAGACCCGCACTCTCCTTTTTGCTAAGACAAGAGCACTAGTAGCTGCTCTGAAGAACTGG  
ATAGAAGAAAACCTCTACTTAATAGCTACATAAAGCCAGATGTTTTGATGGGTCGTGCAAG  
AAACAGTCAGAAAACAGGTATGACCCTCCCAAGCCAGAAGGGTGTGTTGGATGCTTTCAA  
ACCAGTAAGGACAGCAAGCTGCTAATTGCTACATCTGTTGCTGACGAAGGCATTGATATTG  
CCCAGTGCAACCTTGTGTGCTCTATGAATACTACGGCAATGTCATCAAAATGATCCAAGTC  
AGAGGTGCTGGGAGGGCAAGAGACAGCAAGTGCATCCTTGTGACGAGCAAAAGCGAAGT  
GGTTGAGAATGAGAAATACAACCGCTATAAGGAAGAAATGATGAATGCAGCTATTGAAAAG  
CTCCAGAAATGGGATGAAGCAACATTTGCAAGAAAGATATATAACCTGCAAATGAAGGAAA  
AGGTGTTACGAGATTCCAAGAAGAAAGATACAAGACCAAAGGTAGTAGAAGGCAAAAAAAA  
TCTCCTATGTGGAAAATGCAAATCATATGCTTGCAATACAGATGACATCAGAGTTATAAAGG  
AATCTCATCACACCGTCCTTGAGAAAGCATTCAAGGAGCGTTACATAACAAAGCCCCATAA  
GCAACCAGTCCAGTTTGATGATTTTTATGAAAAAAGCAAGATGTATTGCCAAAATACTAATT  
GCCAGCATGACTGGGGAATCATAGTGAAGTACAAGACATTTGATAATCTACCCGTGATCAA  
AATCAAAAGCTTTGTAATGCAGGATGTTGCAACTGGGACACAAATGGATTTTCAGAAATGG  
AGAAATGTTAATTATTCTTTGAAAATTTTTGATGTTGAAGAAATGTCTAACTGA

>sturnus\_vulgaris-rig1

ATGACGGCGGAGGAGAAGCAGAACTTGCGCTGCTACCGGCGCTACATCGAGAGGAGCCT  
GAACCCTGTCTACGTCCTCAGCAACATGACGGACTGGCTGTCCGACGAGGTGAAGGAGAG  
GGTTCGAAAGGAGGAGGAGAAGGGGGTGACGGCGGCCGCCGCGCTGTTCTTGATGCT  
GTGCTGCTGCTGGAGGCGGAGGGCTGGCTCCGGGGCTTCCTGGATGCCCTGGTTGCAGC  
AGGTTACACTGGATTGGCAGAAGCAATTGAAAAGTGGGACTTCAGCAAGCTGGAAAACTT  
GAGCTGCACAGGCAGCTGTTGAAGCGGATAGAAGCAACAATGCTAGAAATTGATCCTGTA  
GCAATTATGCCATACATAAACACATGCCTGATAGACAGGGATTGTGATGAGATACTGCAGA  
TCAGTGAATACAGAAGCAAAGCAGCTGGGATAACCAAAGTCAATTGAATGCCTCTGTGCTC  
TGACAAGGAAAAGTGGCCCAAAAGTCTTCAGCTGGCGCTGGATAATGCAGGATATTACAAT  
GCAAGTGAAGTGTGGAATATAAGAGAAGATAATGGCAAAGATGTGGATAGTGAAATGACAG  
ATGCCTCAGAGAATTACTTTGAAACCATGATGACATTTTCTGAAGAAGCAGAATGTGATAAT  
CTTGGTGAAAATCTCTCTCCAGTTTCAGAAAGCGCCTATGAGTCTTCATCTGTTTATAAACC  
AAAGAAGGCTCGGAGCTACCAGATTGAGCTTGACAGCCTGCTATTGATGGGAAAAACAC  
ATTGATTTGTGCCCCACAGGATCTGGAAAACTTTTGTGGCACTTCTGATTTGTGAACATC  
ATTTGCAAAACGTTCCCTCAGGACGAAAGGCCAAAAGTTGTCTTCCTTGCAACCAAAGTGCC  
AGTGTATGAGCAACAGAAAAATGTATTCAGGCAGCATTTGAAAGAAGTGGATACTCCGTT

CAAGGAATTTGTGGTGAAACAGTAGCAAATATCTCTATAGAAAATGTTATACGGGACAGTGA  
CATCATCGTGCTAACTCCCCAGATTCTTGTGAATAGCATGGGGAAAGGGGTCCTTAGCTCC  
CTCTCCATCTTCACTCTGATGATATTTGATGAGTGCCACAACACTACAGGCAACCACCCTTA  
CAATGTGTTGATGACCAGATACCTGGATGAAAAATTTGACTCCTCTGCAAAACAGCTGCCT  
CAGATTGTAGGTTTAACTGCTTCTCTTGGAGTTGGTAATGCCAAGAGCACTGATGAACTG  
TGGAGCACATCTGTACCCTCTGCTCCTACCTGGACATACAGGCCATATCCACTGTCAGAGA  
GAACAAACAAGATCTGCAAAGATTTGGAAACAAGCCAGAAACACATATCAGATGGGTAAA  
ATGCGACCTCAGAATCACTTTGCAGACATTATCTCAGGTCTGATGTCTGAGACAGAGATGT  
TGATGAGGAAGATTTACTCAGTGGATACCATCTCCCAAATCAACAAGAATTACCTTGGAACA  
CAGAGATATGAACAATGGATAGTTTCTACTCAGAAGAAGTGTAGACTATTGCAACTGGAAG  
ATAAGGAGAAGGAGAGCAGTATTTGTAGAGACCTTTTCATTTGACTGAACACTTGCGGAA  
ATTCAACGATGCTCTGATTATCAGTGAAGATGCCCGCATCGAAGATGCTTTAGCCTACCTA  
AATGAATTTTTACAAATGTAAAAAATGGACCATATACAGAGTTGGAGAAGCAACTGACGGA  
GAAATTTCAAGAGAAAGAGCTAGAAGTACTGCCCTTTCAAAAGATGAGTCAAATGAGAAT  
CCAAAGTTGGAAGAGCTTGCTTGATCCTGGACGAAGCATACCGCTACAACCCAGAGACTC  
GCACTATTCTCTTTGCCAAGACAAGAGCCTTAGTAGCTGCTTTGAAGAAGTGGATAGAAGC  
AAACCCTTTACTTAGCCACATAAAGCCAGATGTGTTGATGGGTAAGGGAAGAAGAGACCAT  
AAACAGGTATGACCCTGCCAATGCAGAAGGGTGTACTGGATGCATTAGAAACGACAAA  
GACATCAGACTGCTAATTGCTACATCTGTTGCTGATGAAGGCATTGATATTACTGCGTGCAA  
CCTTGTCGTGCTCTATGAATACTTTGGTAATGTCACCAAAATGATCCAAGTCAGAGGTCGT  
GGAAGGGCAAGAGACAGCAAGTGCATCCTTGACAAAGCAAAACAGAAGTGGTTGAGAAT  
GAAAACTAAATCGTTACAAGGAAGAAATGATGAATGCAGCTATTGAGAATTTACAGAAGTG  
GGATGAAACAACATTTGCAAGAACGATATGTCGCCTGCAAAGGAGGGAAAAAGGTACTACG  
AGATTCCAAGAAGAATGAAACAAAACCTGAAGTAGTGGAAGGGAAAAAAAATCTTTTGTGT  
GGAAAATGCAAAGTGTATGTGTGCAGTACAGATGACATCAGAATTATAAAGGAATCTCATCA  
CACTGTCCTGGGTGACAAGTTCAAGGAACGTTATATAACAAAACCCACAGGAAACAGTT  
CAGTTTGACGATTTTCAGAAAAAAGCAAGATGCATTGCCGAAATGCTGAGTGCCAGCATG  
ACTGGGGGATCACAGTGAAGTACAAGACATTTGATAATCTACCAGTGATCAAAATCAAAAG  
CTTTGTACTAGAGGACATTGAACTGGGACACAAATGGATTTTCAGAAATGGAAAAGTATTA  
ATTTGTCTTTGAAGAATTTTATGAGGAAACATTGAGCTGA

>sylvia\_atricapilla-rig1

ATGACGGCGGAGGAGAAGCGGAACCTGCAGTGCTACAGGCGGTACATCGAGGGGATCCT  
GAACCCCGTGATACATCCTCAGCAACATGACGGACTGGCTGTCCGACGAGGTGAAGGAGAG  
GGTCCGAAAGGAGGAGGAGAAGGGGGTGACGGCGGCCGCCGCGCTGTTCTGGATACC  
GTGCTGCTGCTGGAGGCGGAGGGCTGGCTCCGTGGCTTCCTGGATGCCCTGGTTGCAGC  
AGGTTACACTGGACTGGCAGAAGCAATTGAAAAGTGGGACTTCAGCAAACTGGAAAACTG  
GAGCTGCACAGGCAGCTGTTGAAGCGGATAGAAGCAACAATGCTAGAAATTGATCCTGTA  
GCAATCATGCCATACATAAACACATGCTTAATAGAGAGGGAGTGTGATGAGATCTTGCAGA  
TCAGTGAATACAGAAGCAAAGCAGCTGGGATAACTAACTCATTGAATGCCTCTGTGCTC  
AGATAAGGAAAACTGGCCCAAAAGTCTTCAGCTAGCATTGGATAATGCAGGATATTACAAT  
GCAAGTGAAGTGTGGAATATAAGAGAAGATAATGGCAAAGATGTTGATGGTGAAATGACAG  
ATGCCTCTGAGAATCACTTTGAAACCATGATGACATTTTCTGAAGAAGCAGAATATGACAA  
CTCAGTGAAAATTTCTCTTCAGTTTCAGAAAGTGTCTATGAGTCTTCATCTGTTTATGGACAA  
AAGAAGGCTCGGAGCTACCAGATTGAGCTTGACAGCCTGCTATTGATGGGAAAAACACAT

TGATTTGTGCTCCACAGGATCTGGAAAACTTTTGTGGCACTTCTGATTTGTGAACATCAT  
TTGCAAAACGTTCCCTCAGGACGAAAGGCCAAAAGTTGTCTTCCTTGCAACCAAAGTGCCAG  
TGTATGAGCAACAGAAAAATGTATTCAGGCAGCATTTTGAAGAAGTGGATACTCTGTTGAA  
GGAATTTGTGGTGAACAGTTGCAAATATGTCTGTAGAAAATGTTATACAGGACAGTGACAT  
CATTGTGCTAACACCCCAGATTCTTGTGAATAGCATGGAGAAAGGCATCCTTAGCTCCCTC  
TCCATCTTCACTCTGATGATATTTGATGAGTGCCACAACACTACAGGCAACCACCCTTACAA  
TGTGTTGATGGCCAGATACCTGGATCAGAAATTTGACTCCTCTGCAAACCAGCTGCCTCAG  
ATTGTAGGTTTAACTGCTTCTGTTGGAGTCGGTAATGCCAAGAGCACTAATGAACTGTAG  
AGCACATCTGTACCCTCTGCTCCTACCTTGACATACAGACCATATCCACTGTCAGAGAGAA  
CAAACAAGACCTGCAGAGGTTTGGAAACAAGCCAGAAACACATATCAGATGGGTAAAATG  
CAAGCTCGGAATCACTTTGCAGACATTATCTCAGGTCTGATGTCTGAGACAGAGGTGTTGA  
TGAAGAGGACTTACTCAGTGGATAACATCTCCCAAATCAACAAGAATTACTTTGGAACACAG  
AGATATGAACACTGGATAGTTTCCACTCAGAGGAAATGCAGACTGTTGCAACTGGAAGATA  
AGGAGAAAGAGAGCAATATTTGCAGAGACATTTTCATTTGTAAGTGAACATCTGCGGAAATTC  
AACGATGCTCTCATTATCAGTGAAGATGCTCGCATTGAAGATGCTTTGGCTTACCTAAATGA  
ATTTTTCACAAATGTAAAAAATGGACCATATACAGAGTTAGAGAAGCAACTGACGGAGAAAT  
TTCAAGAGAAAGAACAAGAGCTGACTGCCCTTTCAAAAGATGAGTCAAATGAGAATCCAAA  
ATTGGAAGAGCTCACTTGCATCCTGGACGAAGCATACCGCTATAACCCAGAGACTCGCACT  
ATTCTCTTTGCCAAGACAAGAGCCTTAGTAGCTGCTTTGAAGAAGTGGATAGAAGCAAACC  
CTGTACTTAGCCACATAAAGACAGATGTGTTGATGGGTAAAGGAAGAAAAGATCATAAAAC  
AGGTATGACCCTGCCAATGCAGAAGGGTGTATTGGATGCATTCAGAAATGACAAAGACATC  
AGACTGCTAATTGCTACATCTGTTGCTGATGAAGGCATTGATATTAGTGAGTGCAACCTTGT  
GGTTCTCTATGAATACTTCGGTAATGTCACCAAAATGATCCAAGTCAGAGGTCGTGGAAGA  
GCAAGAGACAGCAAGTGCATCCTTGTGACAAGCAAAACAGAAGTGGTTGAGAATGAAAAAC  
TAAACCGTTACAAGGAAGAAATGATGAATGCAGCTATTGAAAAGTTACAGAACTGGGATGA  
AACAACATTTACAAGAAGGATACATCAGCTGCAAATTAAGGAAAAGATACTGCGAGATTCCA  
GGAAGAAAGAAACAAAACATAAAGTAGTGGAAGGGGAAAAAACTTTTGTGTGGAAAATG  
CAAAGCGTATGTCTGCAGTACAGATGACATCAGAATTATAAAGGAATCTCATCACACTGTCC  
TAGGTGACGCATTCAAGGAGCGTTATATAACAAAGCCCCACAGGAAACCAGTTCAGTTTGA  
TGGTTTTGAGAAAAAAGCAAGATGCATTGCCAAAATACTGAGTGCCAGCATGACTGGGGG  
ATCACAGTGAAGTACAAGACATTTGACAATCTACCAGTGATCAAATCAAAGCTTTGTAAGT  
AGAGAATGTTGAAACTGGGACACAAATGGATTTTCAGAAGTGGAAAAGTATTAATTTGTCTT  
TGAAGAATTTTGATGAAGAAACATCCAGCTGA

>taeniopygia\_guttata-rig1

ATGACGGCGGAGGAGAAGCAGAACTTGCGGTTCTACAGGCGCTACATAGAGAGGAGCCTA  
AACCCCGTGTACATCCTCAGCAACATGACGGAATGGCTGTCCGATGAGATGGAGGAGAGA  
GTCCGGAAGGAGGAGGAGAAGGGAGTGACGGCGGCCGCGCTGTTCTGGATGCCG  
TGCTGCTGCTGGAGGCGGAGGGCTGGTTCCGGGGCTTCCAGGATGCTCTGGCTGCAGCA  
GGTTACACTGGACTGGCAGAAGCAATTGAAAAGTGGGACTTTGGTAACTGGAAAACTGG  
AGCTGCACAGGCAGCTGTTGAAGCGGATAGAATCAACAATGCTGGAAATTGATCCTGTAGC  
AATCATGCCATACATAAACACATGCCTGATAGAGAGGGAATGTGATGAGATCCTGCAGATC  
AGTGAATACAGAAGCAAAGCGGCTGGGATAACTAACTCATTGAATGCCTCTGTGCTCGG  
ATAAGGAAAAGTGGCCCAAAGTCTTCAGCTGGCATTGGATAGTGCAGGATATTACAATGC  
AAGTGAAGTGTGGAATATAAGAGAAGATAATGGCAAAGATGTTGATGGTGAATGACAGAT



GCCTCTGAGAATAACTTTGAAACCATAATGACATTTTCTGAAGAAGCAGAATGTGATAATCT  
GAGCAAAAATCTCTCTTCAGTTTCAGAACGCATCTGTGAGTCTTCATCTGTTTATGAACCAA  
AGAAAGCTCGGAGCTACCAGATTGAGCTTGACACAGCCTGCTATTGATGGGAAAAACACATT  
GATTTGTGCCCCCACAGGATCTGGAAAACTTTTGTGGCTGTTCTGATTTGTGAACATCATT  
TCCAAAACATTCCCTCAGGACGAAAGGCCAAAAGTTGTCTTCCTTGCAACCAAAATGCCAGT  
GTATGAGCAACAGAAAAATGTATTGAGGCAGCATTTTGAAAGAAGTGGATACTTTGTTCAAG  
GAATTTGTGGTGAAACAGTTGCAAAATATCTCTGTAGAAAATGTTATACAGGACAGTGACATC  
ATTGTGCTAACGCCCCAGATTCTTGTGAATATCATGGATAAAGGGATCCTTAGCTCCCTTTC  
CATCTTCACTCTGATGATATTTGATGAGTGCCACAACACTGCAGGCAACCACCCTTATAATG  
TGTTGATGACCAGATACCTGGATCAAAAATTTGACTCCTCTGCAAAACAGCTGCCTCAGATT  
GTAGGTTTAACTGCTTCTGTCTGGAGTTGGTAATGCCAAGAGCACTAAAGAACTGTAGAGC  
ACATCTGTACCCTCTGCTCCTACCTTGACATACAGGCCATATCCACTGTCAGAGAGAACAA  
ACAAGACCTGCAGAGGTTTGCAAACAAGCCAGAAATACATATCAGATGGGTAAATGCGA  
GCTCAGAATCGTTTTGCAGACATTATCTCAGGTCTGATGTCCGAGACAGAGGTTTTGATGA  
GGAAGATTTACTCAGTGGATACCATCTCCCAGATCAACAAGATTTACTTTGGAACACAGAG  
ATATGAACATTGGATAGTTTCCACTCAGAAGAAATGCAGACTATTGCAACTGGAAGATAAG  
GAGAAGGAGAGCAGTATTTGTAGAGACCTTTTCATTTGTAAGTGAACACTTGCGGAAATTCAA  
CGATGCTCTCATTATCAGTGAAGATGCTCGCATCGAAGATGCTTTAGCCTATCTAAATGAAT  
TTTTCACAAATGTAAAAACGGACCATATACAGAGTTAGAGAAGCAGCTGACAGAGAAATTT  
CAAGAGATAGAACAAGAGCTGACTGCCCTTTCAAAAGATGAGTCAAATGAGAATCCAAAGT  
TGGAAGAGCTTGCTTGCATCCTGGATGAAGCATACCACTATAACCCACAGACTCGCACTAT  
TCTCTTTGCCAAGACAAGAGCCTTAGTAGCTGCTTTGAAGAAGTGGGTAGAAGCAAACCT  
CTTCTTAGCCACATAAAGCCAGATGTGATGATGGGTAAGGGAAGAAGAGATCAGAAACCAG  
GTATGACCCTGCCAATGCAGAAGGGTGTCTGGATGCATTCAGAAATGACAAAGACATCAG  
ACTGCTAATTGCTACATCTGTTGCTGACGAAGGCATTGATATTACTGAGTGCAACCTTGTG  
GTGCTCTATGAATACTTCGGTAATGTCACCAAAATGATCCAAGTCAGAGGTCGTGGAAGGG  
CAAAAGACAGCAAGTGCATCCTTGTGACAAGCAAAACGGAAGTGGTTGAGAATGAAAACT  
AAACACTTACAAGGAAGAAATGATGAATGCAGCTATTGAAAAGCTACAGAACTGGGATGAA  
ACAACATTTGCAAGAAAGATACGTGGCCTCCAAATGAAGGAAAAAATGCTAAGAGATTCCA  
GGAAGAATGAAACAAAACATGAACTAGTGGAAGGGGAAAAAACTTTACTGTGGAAAATG  
CAAAGCATATGCCTGCAGTACTGATGACATCAGAATTATAAAGGGATCTCATCACATTGTCT  
TAGGTAACGCATTCCAGGAGCGTTATACAACAAAGCCCCACAGGAAACCGGTTTCACTTTGA  
TGATTTTGTGAAAAAAGCAAGATGCATTGCCGAAATACCGAGTGCCAGCATGACTGGGGG  
ATCATAGTGAAGTACAAGATATTTGATAATCTACCCGTGATCAAAATCAGAAGCTTTGTACT  
AGAGGATGTTGAAAGTGGGTACAAATGGATTTTCAGAAATGGAGAAGTATTAATTTGTCTT  
TGAAGAATTTTGATGAAGAAACATGCAGCTGA

>tauraco\_erytholophus-rig1

ATGACGGCGGAGGAGAAGAGGAGCCTGGAGTGCTACAGGCGGTACATCGAGAAGAGCCT  
GAACCCCGTCTACATCCTGAGCAACATGACGGACTGGCTGTCCGACGAGGTGAAGGAGAG  
AGTGCGGAAGGAGGAGGAGAAGGGGGTGACGGCGGCCGCCGCACTGTTTCTGGATGCC  
ATCCTGCAGCTGGAGACCGAGGGCTGGCTCCGGGGCTTCGTGGACTCCCTGGTTGCAGC  
AGGTTACACTGGACTGGCAGAAGCAATTGAAAAGTGGGACTTTAGGAACTGGAAAACTG  
GAGTTGCACAGACAGCTGTTGAAGCGGATAGAAGCAACAATGCTAGAAGTTGATCCAGTA  
GCCCTCATGCCCTACATAAACACGTGCCTGATAGAAAGGGAGTGTGATGAGATCTTGCAGA

TTAGCGAATACAGAAGCAAAGCAGCCGGGATAACTAACTCATTGAATGTCTCTGTGATC  
GGATAAGGAAAACCTGGCCGAAAAGCCTTCAGCTGGCACTAGATAACACAGGATATTACAAT  
GCAAGCGAACTGTGGAATATGAGAGAAGATAATGGTAAAGATGTTGATGGTGAAATGACGG  
ATGCCTATGAGAACAGCATTGAAACCACAATGACATTTTCTGAAGAAGCAGAATGTGATAAT  
GTCAGTGAAAATCTCTGTTTCAGCTTCAGAAAAGGATCTATCAGTCTTCACCTGTTTATGAGCC  
TAAGAAGGCTCGGAGCTACCAGACTGAACTTGCACAACCTGCTATCAATGGGAAAAACACA  
CTGATATGTGCCCCCACAGGCACTGGAAAAACCTTTGTGGCACTTCTGATTTGTGAACACC  
ATTTCCAAAACGTGCCCCGGAGGACGAAAGGCAAAAGTTGTCTTTCTTGCAACTAAAGTGCC  
AGTGTATGAACAACAGAAAACCTGTGTTCAAGCAGCATTTTGAAAGAATTGGATATTCTGTTG  
AAGGACTTAGTGGTGAAACAGTTGCAAATGTCTGTGTAGAAAAGGTTATACATGACAGTGA  
CATCATTGTGCTGACGCCCCAGATTCTTGTGAATAGCATCGAGGAAGGGATTGTTAGCTCC  
CTCTCCATCTTCACTCTGATGATATTTGATGAGTGCCACCACACTACGGGCAACCACCCTT  
ACAACGTGTTAATGACCAGATACCTGGAACAAAAATTTTACTCCTCTGCAAACCAGCTGCCT  
CAGATTGTAGGTTTAAACAGCTTCTGTTGGAGTTGGTAATGCCAAGAGCATTGAGGAAACAA  
TAGAGCACATCTGTACCCTCTGCTCCTACCTTGACATACAGGCCTTATCCACTGTCAGAGA  
GAACAAACAGGATCTGGAGAGATTGAGAAACGAGCCAGAAACACATGTCAGATTGGTTAAA  
ATGCGAGTTCAGAATCACTTTGCAGACATTATCTCAGGTCTGATGTCTGAGACAGAGGCGT  
TGATGAGGAACATTTACTCAGTGGGTACTATCTCTCAAATCAACAAGAATGATTTTGAACA  
CAGAAATATGAACACTGGATAGTTGCCACTCAGAAAAAATGCAGACTGTTGCAACTGGGAG  
ATAAGGAGGAGGAAAGCAGCGTTTGTAGAGACCTTTTCATTTGCACTGAACACCTGCGGAA  
ATTCATGATGCTCTCATCATCAGTGAAGATGCCCGCATTGAAGATGCTTTAGCCTACCTAA  
CTGAATTTTTTCACAAATGTCAAAAATGGACCATATACAGACTTAGAGAAGCAACTAACAGCC  
AAATTTCAAGAGAAAGAACCAGAACTGACTGCCCTTTCAAAAGATGAATCAAATGAGAATCC  
CAAGCTGGAAGAGCTTGCTTGCATCCTGGATGAAGCATACCACTATAACCCACAGACTCGC  
ACTCTTCTCTTTGCTAAGACAAGAGCCTTAGTAGCTGCCTTGAAGAAGTGGGTAGAAGCAA  
ACCCTCTGCTTAGCCACATAAAGCCAGATATGTTGATGGGTGCTGGAAGAAGAGATCAAAA  
AACAGGTATGACCCTCCCCATGCAGAAGGGTGCACTGGATGCATTCAAACCAACAAAGA  
GGGCAGATTGCTAGTTGCTACATCTGTTGCTGATGAAGGCATTGATATTTCTGAGTGCAAC  
CTTGTGGTGCTCTATGAATACTTCGGTAATGTCACCAAAATGATCCAAGTCAAAGGTCGTG  
GAAGGGCAAGAGACAGCAAGTGCATCCTGGTGACAAGCAAAACAGAAGTGTTGAGAATG  
AGAGGGCAAAACCGTTTTAAGGAAGAAATGATGAATGAAGCTATTGAAACGCTGCAGAATTG  
GGATGAAACAACATTTGCAAGAAAGATACATGACCTGCAAATGAAGGAAAAGGTATTACGA  
GATTCCAGGAAAAAAGAAACAAAACCTAAGGTAGTGGAAGGGAAAAAAAATCTTCTATGTG  
GAAAATGCAAAGCATATGCCTGCAGTACTGATGACATCAGAGTTATAAAGGAATCTCATCA  
CACTGTCCTAGGAGATGCATTCAAGGAGCGTTACATAACAAAGCCTCATAAGAAACCGGTC  
CAGGTTGACTGTTTTCTGAAAAAAGCAAGATGCATTGCCAAAATACTAATTGCCAGCATGA  
CTGGGGAATCATAGTGAAGTACAAGACATTTGATAATCTACCAGTGATCAAAATCAAAGCT  
TTGTAGTAGAGAATGTTGAAACTGGGACACAAATGGATTTTCAGAAATGGAAAAATATTAAT  
TTTTCTTTGAAGAATTTTGATGTTGAAGAAACATACAGCTGA

>tyto\_alba-rig1

ATGACGGCGGAGGAGAAGAGGAGCCTGCAGTGCTGCAGGCGGTACATCGAGAAGAGCCT  
GAACCCCATCTACATCCTGGGCAACATGACGGACTGGCTGTCCGACGAGGTGAAGGAGAG  
AGTCCGAAAGGAGGAGGAGAAGGGGGTGACGGCGGCCGCGCTGTTTCTGGATGCCA  
TCCTGCAGCTGGAGGTGGAGGGCTGGCTCCGGGCCTTCTGGACGCCCTGGTTGCAGTA

GGTTACACTGGATTGGCTGAAGCAATTGAAACCTGGGACTTCAGCAAACCTGGAAAACTGG  
AGTTGCACAGGCAGCTCTTGAAGCGGATAGAAGCAACAATGCTAGAAGTTGATCCGGTAG  
CACTCATGCCTTACATAAACACATGCCTGATAGAAAGGGAGTGTGATGAGATCCTGCAGAT  
TAGTGAATACAGAAGCAAAGCAGCTGGAATACTAACTCATTGAATGTCTCTGTGATCG  
GATAAGGAAAACTGGCCAAAAAGCCTTCAGCTGGCACTAGATAATGCAGGATATTACAATG  
CAAGTGAACCTGTGGGATATGAGAGAAGATAATGGCAAAGTTTTTGATGGTGAAATGACAGA  
TGCTTCTGAGAACAGCTTTGAAACCACAATTACATTCTCTGAAGAAGCAGAATGTGATAATA  
ATCTCAGTGAAAATCTGTGCTCAGCTTCAGAGGGGACCTGTCAGTTTTACCTGTTGATGA  
ACCAAAGGAGGCTCGGAACTACCAGACTGAGCTTGCGCAGCCTGCTATCAATGGGAAAAA  
CACATTGATATGTGCCCCAACAGGAACTGGAAAACTTTTGTGGCACTTCTGATTTGTGAAC  
ATCATTTCCAAAACACGTTCTTGGGACGAAAGGCCAAAAGTTGTCTTTCTTGCAACCAAAGTG  
CCAGTGTACGAACAACAGAAAACCTGTATTCAAACAGCATTTTGAAAGAAGTGGGTACTCTG  
TTCAAGGAATTAGTGGTGAAACAGTTGCAAATGTCTCTGTAGAAAAGGTTATACAGGACAG  
TGACATCATTGTGCTAACGCCCCAGATTCTTCTGAACAGCATCGAGGAAGGGATCGTTAGC  
TCCCTCTCTATCTTCACTCTGATGATATTTGATGAGTGCCACAACACTACAGGCAACCAACC  
TTACAATGTGTTAATGACCAAATACCTGCAACAAAAATTTGGCTCCTCTGCAAACCAACTGC  
CTCAGATTGTAGGTTTAACCGCTTCTGTTGGAGTTGGTAATGCCAAGACTGTTGAGGAAAC  
GGTAGAGCACATCTGTACCCTCTGCTCCTACCTTGACATACAGACCATATCCACTGTCAGA  
GAGAACAAAGAGGAGCTGCAGAGATTACAAACAAGCCAGAAACGTTTGTGAGATGGGTT  
AACATGCGAGTTCAGAATCACTTCGCAGACATTATCTCGGGTCTGATGTCTGAGACAGAGG  
CATTGATGAGGAAGATTTACTCAGTGGATACTATCTCCCAAATCAACAAGAATGATTTTGG  
ACACAGAAATATGAACAGTGGATAGTTGCCACTCAGAAGAAATGCAAACCTGTTGCAACTGG  
CAGATAAGGAGAAGGAGAGCAGCATTGTAGAGACCTTTTCATTTGCACGGAACACCTGCG  
GAAATTCAACGATGCTCTCATCATCAGCGAAGATGCCCGCATTGAAGATGCTTTAGCCTAC  
CTAACTGAATTTTTCACAAATGTTAAAAATGGACCATATACAGAGTTAGAGAAGCAACTGAC  
AGCCAAATTTCAAGAGAATGAACCAGAACTGACTGCCCTTTCAAAGATGAATCAAACGAG  
AATCCCAAGCTGGAAGAGCTTGCTTCCATACTGGATGAAGCATACCGCTATAACCCACAGA  
CTCACACTCTTCTCTTTGCTAAGACAAGAGCATTAGTAGCTGCTTTGAAGAAGTGGGTGGA  
AGGAAACCTCTGCTTAGCCACATAAAGACAGATGTGTTGATGGGTCATGGAAGAAGAGAT  
CAAAAAACAGGTATGACCTTCCCAATGCAGAAGGGTGTACTGGATGCATTCAAACCAACA  
AAGACAGCAGACTGCTAATTGCTACATCAGTTGCTGACGAAGGCATTGATATTTCTGAGTG  
CAACCTTGTTGTGCTCTATGAATACTTTGGTAATATCAGCAAATGATCCAAGTCAGAGGTC  
GTGGAAGGGCAAAAGGCAGCAAGTGCATCCTTGTGACAAGCAAAACAGAAGTGGTTGAGA  
ATGAGAAACACAACCGTTATAAAGAAGAAATGATGAATGAAGCTATTGAAGAGCTACAGAAT  
TGGGATGAAACAACATTTGTAAGAAAGATACACGACCTGCAAATGAAGGAAAAGGTACTAC  
GAGATTACAGGAAGAAAGAAACAAGATGTACAGTAGTGGAAGGAGAAAAAACCTTCTGTG  
TGGAAAATGCAAAGTGTATGCCTGTAGTACAGGTGACATCAGAGTTATAAAGAAATCTCATC  
ACACTGTCCTAGGAGACGCATTCAAGGAACGTTATATAACAAAGCCTCACCAGAAACCACT  
CCAGTTTGATTGTTTTGAGAAAAAAGCAAGATGCATTGCCAAAATCCTAATTGCCAACATG  
ACTGGGGAATCATAGTGAAGTACAAGACATTTGATAATCTACCAGTGATCAAATCAAAGC  
TTTGTAGTAGAGAACTGAACTGGGACACAAATGGATCTTCAGAAATGGAAAAATATTAA  
TTTTTCACTGAAGAGTTTTGATGTTGAAGAAACATCCAGCTGA

>upupa\_epops-rig1

ATGACCGCGGAGGAGAAGAGAAACCTGCGATGCTACCGGCGGTACATCGAGCAAAGCCT

GAATCCCATCTATGTCCTGAGCAACATGACGGACTGGCTACCAGACGTGGTGAAGGAGCG  
CGTCCGGAAGGAGGAGGAGAGGGGGGTAACATCGGCCGCTGCCCTGTTTCTAGATGCTG  
TCCTGCAGCTGGAGGCGGAGGGGTGGCTGAGGGGATTCTGGACGCTCTGGTTGCAGCA  
GGTTACACTGGGCTGGCAGAAGCAATTGAAAACCTGGGACTTCAGCAAACCTGGAAAACTG  
GAGGTGCACAGACAGCTGTTGAAGCGGATAGAAGCAACAATGCTGGAAGTTGACCCAGCA  
GCACTCATGCCTTACATAAGCACCTGTCTGATAGACAGGGAATGTGATGAGATCTTGCAGA  
TCAGCGAATACAGAAGCAGAGCAGCTGGGATAACCAAACCTCATTGAATGTCTGTGTCGATC  
AGATAAGGAAAACTGGCCAAAAAGCCTTCAACTGGCACTAGATAACACAGGATATTACAAT  
GCGAGTGAAGTGTGGGATATGAGAGAAGTTAATGGCAAAGATGTTGGTGAAATGACAGAG  
GGCTCTGACTACTGCTTTGAAACCACCGTGACATTTTCTGAAGAAGCAGAGTGTAATAATCT  
CAGTGAACAACTTCTGTTACCTTCAGAAGGGATCTCTCAGTCTTCACCTGTTTATGATCTGA  
AGAAAGCTCGGAGCTACCAAACCTGAACTTGCACAGCCTGCTATCAGTGGGAGAAACACATT  
GATATGTGCTCCACAGGATCTGGAAAACTTTTGTGGCGCTTCTGATTTGTGAACACCATT  
TCCAAAACACACCTTCAGGACAAAAAGCCAAAGTTGCCTTTCTTGCAACCAAAGTGCCAGT  
GTATGAACAACAGAAAAATGTATTCAAGCAACACTTTGAAAGAAGTGGATACTCTGTTCAAG  
GAATTAGTGGTGAAACAGCTGCAAATATCTCTGTAGAAAGGGTTATAGAGGACAATGACAT  
CATTGTGCTAACACCCCAGATTCTCGTGAAGTCTTGGAGCATGGGGTTCTAAGATCCCTC  
TCCATCTTTACTCTGATGGTATTTGATGAGTGCCACAACACTACAGGCAACCACCCTTACAA  
TGTGTTGATGACCAGATACCTGGAACAAAAGTTTGAGTCATCTGCAAACCAGCTGCCTCAG  
ATTGTAGGACTAACTGCTTCTATTGGAGTTGGTAATGCCAAGAACATGAAGGATACAGTGG  
AGCACATCTGGACCCTCTGCGCCTCCCTTGATATACAGACCATATCCAGTGTGAGAAAGAA  
CAAGGAGGACCTGCAGAGATTTGTAAACAAGCCAGAAACAGATGTCAGATGGGTAAATG  
CGAGTTCAGAATCACTTTGCAGGCATCATTTCAGGTCTGATGTCCAAGACAGAGGCGTTGA  
TGAGGCAGATTTACTCACTGGACACTATATCCCAAATCAGTAAGAGTGACTTTGGAACACA  
GAAATATGAACACTGGATAAATGTCAATCAGAAGAAATGCAGACTGCTGCAACTGGCGGAT  
AAGGAGAAGGAGAGCAGCCTTTGCAGAAATCTTTTCATTTGCACTGAACACCTGCGGAAAT  
TCAATGATGCTCTCATGATTAGCGAAGATGCCCCGCTTGAAGATGCTTTAGTCTACCTAACT  
GAATTTTTCACTAATGTCAAGAATGGACCATATACAGATTTAGAGAAGCAACTCACAGCCGC  
ATTTGAAGAGGAAGAACCAGAACTGATTGCCCTTTCAAAGATGAATGTAATGAGAATCCC  
AAGCTGGAGGAGCTTGCTTCCATCCTGGATGAAGCATACCACTATAACCCASAGACTCGCA  
CTATTCTCTTTGCTAAGACAAGAGCCTTAGTAGCTGCTTTGAAGAAATGGGTAGAAACAAAC  
CCCGTGCTTAAGTATCTAAAGCCTGCTGTGTTGATGGGTCGTGCAAGAAGAGATCAAAAAA  
CAAGTATGACACTTCCAATGCAGAAAGGTGTACTGGATGCATTCAAACACAGCAAAGACAG  
CAGACTGCTCATTGCTACTTCTGTTGCTGATGAAGGCATTGATATTTCTGAGTGCAACCTTG  
TTGTGCTCTATGAATACTATGGAAATGTCACCAAATGATCCAAGTCAGAGGTCGTGGAAG  
GGCAAAAGACAGCAAGTGATCATTGTGACAAGCAAAGCAGAAGTGTTGAGAATGAGAA  
ACAAAACCGTTATAAAGAAGAAATGATGAACAAAGCTATGGAAACACTGCAGAACTGGGAT  
GAAGCAACATTTGCCAGAAAGATACGTGACCTGCAACTGAAAGAAAAAGCATTACGAGATT  
CCAGAAATAAAGAAACAAGACATCAAGTACTGGAAGGGAAAAGAAATCTTCTTTGTGGA  
ATGCAAAGCATATGCCTGCAGTACAGATGACATCAGAGTTATAAAGGAATCTCATCACATTG  
TCCTAGGAGAGGAGTTCAAGGAGCGTTACATAACAAAGCCTCACCAGCGACCTGTCCAGT  
TTGATTGTTTTGAGAAAAAAGCAAGATGCATTGTCAGAAATCCTAAGTGCCAGTATGACTGG  
GGAATCATAGTGAAGTACAAGACATTTGATAATCTACCAGTGATCAAATCAAAGCTTTGT  
GGTGGAGAACATTGAACTGGGACACAAACAGATTTTCAGAAATGGAAAAATATTAATTTTT

CTTTGAAGAATTTTGATGAAGTAACATCCAGCTGA

>uria\_lomvia-rig1

ATGACCGCGGAGGAGAAGAGGAGCCTGCAGTGCTACCGGCGGTACATCGAGAAGATCCT  
GAACCCCGTCTACATCCTGAGCAACATGACGGAGTGGCTGTCCGACGAGGTGAAGGAGA  
GAGTGCGGAAGGAAGAGGAGAAGGGGGTGACGGCGGCCGCCGCGCTGTTTCTGGATGC  
CATCCTGCAGCTGGAAGTGGAGGGATGGCTCCGGGGCTTCATCGACGCCCTGGTTGCAG  
CAGGTTACACCGGACTGGCAGAAGCAATTGAAAACCTGGGACTTCAGCAAACCTGGAAGC  
TGGAGCTGCACAGACAGCTGTTGAAGCGGATAGAAGCAACGATGCTCGAAATTGATCCGG  
TAGCGCTCATGCCCTACATAAACACGTGCCTGATAGAAAGGGAGTGTGATGAGATCCTGCA  
GATTTGCGAATACAGAAGCAAAACAGCTGGGATAACTAACTTATTGAATGTCTCTGTGAT  
CGGATAAGGAAAACCTGGCCGAAAAGCCTTCAACTGGCACTAGATAACACAGGATATTACAA  
TGCAAGCGAACTATGGGATATGAGAGAAGATAACGGCAAAGATGTTGATGGTGAAATCACA  
GATGCCTCTGAAAACACCTTTGAAACCACGATGACATTCTTTGAAGAAGCAGAATGTGATAA  
TAATCTCAGTGAAAATCTCTGTTTCAGCTTTAGAAGGGACTGATCAGCCTTCTCCTGTTTATG  
AACCAAAGAAGGCTCGGAGCTATCAGGTTGAACTTGCGCAGCCTGCTATCAATGGGAAAA  
ACACAGTGATATGTGCCCCACAGGCTCTGGAAAACTTTTGTGGCACTTATGATTTGTGA  
ACACCATTTCCAAAAGTATGCCTGCAGGACGAAAGGCGAAAGTTGTCTTTCTTGCAACTAAA  
GTGCCAGTGTACGAACAACAGAAAAATGTATTCAAACAGCATTTTGAAAGACGTGGATATTC  
TGTTCAAGGAATTAGCGGTGAAACAGTTGCAAATGTCTCTGTAGAAAAGATTATACAGGAC  
AGTGACATCATTGTGCTGACGCCCCAGATTCTTGTGAATAGCATTGAGGAAGGGATCCTTA  
GCTCCCTCTCCATCTTCACTCTGATGATATTTGATGAGTGCCACAACACTACGGGCAACCA  
CCCTTACAATGTGTTAATGACCAGATACCTGGAACAAAAATTTGGCTCCTCTGCAAACCAG  
CTGCCTCAGATTTTAGGTTTAACTGCTTCTGTTGGAGTTGGTAATGCCAAGAACGTGAGG  
AAACAATTGAGCACATCTGTACCCTCTGCTCCTACCTTGACATACAGGCCATATCCACTGTC  
AGAGAGAACAAAGAGGATCTGCAGAGATTCAGAAACACTCCAGAAACATATGTCAGATGGG  
TTAAATGCGAGTTCAGAATCACTTTGTAGACATTATCTCAGGTCTGATGTCTGAGACAGAA  
ATGATGATGAGGAAGATTTACTGTGTGGATACTGTCTCCCAAATCAACAAGAATGATTTTGG  
AACACAGAAATATGAACACTGGATAGTTGCGACTCAGAAGAAATGCAAACCTGTTGCAACTG  
GCAGACAAGGAGAAGGAGAGCAGCATTTGTAGAGACCTTTTCATTTGCACTGAACACCTGC  
GGAAATTCAACGATGCTCTCATCATCAGTGAAGATGCCCGCATTGAAGATGCTTTAGCCTA  
CCTCACTGAATTTTTTCACAAATGTCAAAAACGGACCCTATACAGAGTTAGAGAAGCAACTGA  
CAGCCAAATTTCAAGAGAAAGAACCAGAACTGACTGCCCTTTCAAAGATGAATCAAATGA  
GAATCCCAAGCTGGAAGAGCTTGCTTGCATCCTGGATGAAGAATACCACTACAACCCAGAG  
ACTCGCGCTCTTCTCTTTGCTAAGACAAGAGCCTTAGTAGCTGCTTTGAAGAAGTGGGTAG  
AAGCAAACCCTCTACTTAGCTACATAAAACCAGATGTGTTGATGGGTCTGTGGAAGAAGAGA  
TCAAAAAACAAGTATGACCCTCCCAATGCAGAAGGGGATACTGGATGCATTCAAACCAAC  
AAAGACAGCAGACTGCTAATTGCTACGTCAGTTGCTGACGAAGGCATTGATATTTCTGAAT  
GCAACCTTGTTGTGCTCTATGAATACTTCGGTAATGTCACCAAAATGATCCAAGTCAGAGGT  
CGTGGAAGGGCAAGAGACAGCAAGTGCATCCTTGTGACAAGCAAAACAGAAGTGGTTGAG  
AATGAGAAACACAACCGTTACAAGGAAGAAATGATGAATGAAGCTATTGAGGAGCTACAGA  
ATTGGGATGAAACAACATTTGCAAGACGGATACATGACCTGCAAATGAAGGAAAAGGTATT  
ACGAGATTCCAGGAAGAAAGAAGCAAGACCTAAGGTAGTGGAAGGGGAAAAAAATCTTCTG  
TGTGGAATGCAAAGCATATGCCTGCAGTACAGATGACATCAGAATTATAAAGGAATCTC  
ATCACACTGTCTAGGAGACGCATTCAAGGAGCGCTACATAACAAAGCCTCACCATAAAGC

AATCCAGTTTGATTGTTTTGAGAAAAAAGCAAGATGCATTGCCAAAATACTAGTTGCCAGC  
ATGACTGGGGAATCACAGTGAAGTACAAGACATTTGACAATCTACCAGTGATCAAAATTA  
AGCTTCGTAGTAGAGGACGCTGAAACTGGGACACAAATGGATTTTCAGAAATGGAAAAA  
TTAATTTTTTCATTGAAGAATTTTGATGAAGAAATGTCCAGCTGA

>zonotrichia\_albicollis-rig1

ATGACGGCGGAGGAGAAGCAGAACCTGCAGTGCTGCAGGCGCTACATCGAGAGGAGCCT  
GAACCCCGTGACATCCTCAGCAACATGACGGAATGGCTGTCCGACGAGGTGAAGGAGAG  
AGTCCGCAAGGAGGAGGAGGAGAAGGGCGTGACGGCGGCCGCCGCGCTGTTCTTGAT  
GCCGTGCTGCTGCTGGAGGCGGAGGGCTGGCTCCGGGGCTTTCTGGATGCCCTGGTTGC  
AGCAGGTTACACTGGACTGGCAGAAGCAATTGAAAACCTGGGACTTCAGCAAACCTGGAAAA  
CTGGAGCAGCACAGGCAGCTGTTGAAGCGGATAGAAGCAACAATGCTAGAAATTGATCCA  
GTAGCAATCATGCCATACATAAACACATGCCTGATAGAGAGGGAGTGTGATGAGATCCTGC  
AGATCAGTGAAAACAGAAGCAAGGCAGCCGGGATAACGAAACTCATTGAATGCCTCTGTC  
GCTCGGATAAGGAAAATTGGCCCCAAAAGTCTTCAGGTGGCATTGGATAGTGTGAATATTA  
CAATGCAAGTGAACCTGTGGAATATGAGAGAAGATAATGGCAAAGACATTGATGGTAAATG  
ACAGATGCCTCTGAGAATTACTTTGAAACCATGATGACATTTTCTGAAGAAGCAGAATGTGA  
TAATCTGAGCCAAAATCTCTCTTCAGTTTCAGAAAGCATCTATGAGTCTTCATCTGTTTATGA  
ACCAAAGAGGGCTCGGAGCTACCAGATTGAGCTTGCACAGCCTGCTTTTGATGGGAAAAA  
CACATTGATTTGTGCCCCACAGGATCTGGAAAAACTTTTGTGGCGCTTATGATTTGTGAAC  
ATCACTTGCAAACGTTCCCTCAGGACGAAAGGCAAAAGTTGTCTTCCTTGCAACCAAAGT  
GCCAGTGTATGAGCAACAGAAAAATGTATTCAGGCAGCATTTTGAAGAAGTGGATACTCT  
GTTCAAGGAATTTGTGGTGAAACAGTTGCAAATATCTCTATAGAAAATGTTATACAGGACAG  
TGACATCATTGTGTTAACGCCCCAGATTCTTGTGAATAGCATGGAGAAAGGGATCCTTAGC  
TCCCTCTCTGTCTTCACTCTGATGATATTTGATGAGTGCCACAACACTACAGGCAACCACC  
CTTACAATGTGTTGATGACCAGATACCTGGATCAAAAATTTGACTCCTCTGCAAACCAGCTA  
CCTCAGATTGTAGGTTTAACTGCTTCTGTTGGAGTTGGTAATGCCAAGAGCACTAATGAAA  
CTGTAGAGCACATCTGTACCCTCTTCTCCTACCTTGACATACAGGCCATATCCACTGTCAG  
AAAGAACAAAGAAGATCTGCAGAGGTTTCAAAATAAGCCAGAAACACATATCAGATGGGTT  
AAAATGCGAGCTCAGAATCACTTTGCAGACATTATCTCAGCTCTGATGTCTGAGACAGAAG  
TGTTGATGAGGAAGATTTACTCAGTGGATTCCATCTCCCAAATCAACAAGAATTACTTTGGA  
ACACAGAGATATGAACAGTGGATAGTTTCCACTCAGAAGAAATGCAGACTATTGCAACTGG  
AAGACAAGGAGAAGGAGAGCAGTATTTGTAGAGACCTTTTCATTTGTAAGTGAACACTTGCG  
GAAATTTAACGATGCTCTCATTATCAGTGAAGATGCCCGCATTGAAGATGCTTTAGCCTACC  
TAAATGAATTTTTACAAATGTAAAAACGGACCATTACAGAGTTAGAGAAGCAGCTGACG  
GAGAAATTTCAAGAGAAAGAACAAGAGCTGAATGCCCTTTCAAAGATGAGTCAAATGAGA  
ATCCAAAGTTGGAAGAGCTTGCTTGCATCCTGGATGAAGCATACCACTATAACCCAGAGAC  
TCGCACAATTCTCTTTGCCAAGACAAGAGCCTTAGTAGCTGCTTTGAAGAAGTGGATAGAA  
GGAAACCCTCTTCTTAGCCACATAAAGCCAGATGTGTTGATGGGTAAAGGAAGAAGAGATC  
AGAAAACAGGTATGACCTTGCCAATGCAGAAGGGTGTACTGGATGCATTGAGAAATGACAA  
AGACATCAGACTGCTAATTGCCACATCTGTTGCTGACGAAGGCATTGATATTACTGAGTGC  
AACCTTGTGGTGCTCTATGAATACTTCGGAAATGTCACCAAAATGATCCAAGTCAGAGGTC  
GTGGAAGGGCAAGAGACAGCAAGTGCATCCTCGTGACAAGCAAGACAGAAGTGGTTGAGA  
ACGAAAAACGAAACAGTTACAAGGAAGAAATGATGAATGCAGCTATTGAAAAGCTACAGAA  
CTGGGATGAAACAACATTTGCAAGAAAGATACATGGCCTGCAAATGAAGGAAAAGATGGTA

CGAGATTCCAGGAAGAACAACAAAACCAAGAAATAGTAGAAGGGGAAAAAAATCTTTTGT  
GTGGAAAATGCAAAGCATATGTCTGCAGTACAGATGACATCAGAATTATAAAGGAATCTCAT  
CATACTGTCTTAGGTGATGCATTCAAGGAGCGTTATACAACAAAGCCCCACAGGAAACCTC  
TTCAATTTGATGGTTTTGAGAAAAAAGCAAGATGCATTGCCAAAATACTGAGTGTGAGCAT  
GACTGGGGGATCATAGTGAAGTACAAGATATTTGACAATCTACCAGTGATCAAAATCAGAA  
GCTTTGTACTAGAGGATGTTGAAACAGGGACACAAATGGATTTTCAGAAATGGAAAAGTCT  
TAATTTGTCTTTGAAGGAGTTTGATGAAGAAACATCCAGCTGA

>zosterops\_pallidus-rig1

ATGACGGCGGAGGAGAAGCGGAACCTGCAGTGCTACCGGCGGTACATCGAGAGGATCCT  
GAACCCCGTGACATCCTCAGCAACATGACGGACTGGCTGTCCGACGAGGTGAAGGAGC  
GAGTCCGAAAGGAGGAGGAGAAGGGGGTGACGGCGGCCGCCGCGCTGTTCTGGATGC  
CGTGCTGCTGCTGGAGGCGGAGGGCTGGCTCCGGGGCTTCCTGGATGCGCTGTTTGCGG  
CAGGTTACACTGGACTGGCAGAAGCAATTGAAAACCTGGGACTTCAGCAAACTGGAAAACT  
GGAGCTGCACAGGCAGCTGTTGAAACGGATAGAAGCAACAATGATAGAAATTGATCCTGT  
GGCAATCATGCCATACATAAACACATGCCTGATAGAAAGGGAGTGTGATGAGATCCTGCAG  
ATCAGTGAATACAGAAGCAAAGCAGCTGGGATAACTAACTCATTGAATGCCTCTGTCGTT  
CGGATAAGGAAAACCTGGCCCCAAAAGTCTTCAGCTGGCATTGGATAATGCAGGATATTACAA  
TGCAAGTGAACCTTTGGAATATAAGAGAAGATAATGGCAAATATGTTGATGGTGAAATGACA  
GATGCCTCTGAGACTCAGTTTGAAACCTTGGTGACATTTTCTGAAGAAGCAGAATGTGATA  
ATCTCAGTGAAAATCTCTCTTCAGCTTCAGAAAGCATCTATGAGTCTTCATCTGTTTATGAA  
CCAAAGAAGGCTCGGAGTTACCAGATTGAGCTTGACAGCCTGCTATTGATGGGAAAAACA  
CATTGATTTGTGCCCCACAGGATCTGGGAAAACCTTTTGTAGCACTTATGATTTGTGAACAT  
CATTTGCAAAATATTCCCTCTGGACAAAAGGCAAAAGTTGTCTTCCTTGCAACCAAAGTGCC  
AGTGTATGAGCAACAGAAAAATGTATTGAGGCAGCATTTTGAAGAAGAGGATACTCTGTT  
CAAGGAATTTGTGGTGAAACAGTTGCAAATATATCTGTAGAAAATGTTATACAGGACAGTGA  
CATCATTGTGCTAACACCCCAGATTCTTGTAATAGCATGGAGAAAGGCATCCTTAGCTCC  
CTCTCCATCTTCACTCTGATGATATTTGATGAGTGCCACAACACTACAGGCAACCACCCTTA  
CAATGTGTTGATGGCCAGATACCTGGATCAAAAATTTGACTCCTCTGCAACCAGCTGCCT  
CAGATTGTAGGTTTAACTGCTTCTGTTGGAGTTGGTAATGCCAAGAGCACTAATGAACTGT  
AGAGCACATCTGTACCCTCTGCTCCTACCTTGATATAAAGGCCATATCCACTGTCAGAGAG  
AACAAAGAAGATCTGCAGAGGTTTGGAAACAAGCCAGAAACACATATCAGATGGGTAAAAA  
TGCAAGCTCGGAATCGCTTTGCAGACATTATCTCAGGTCTGATGTCTGAGACAGAGGTGTT  
GATGAGGAAGACTTACTCAGTGGCTAACATCTCCCAAATCAACAAGAATAACTTTGGAACA  
CAGAGATATGAACACTGGATAGTTTCCACTCAGAGGAAGTGACAGACTGTTGCAACTGGAAG  
ATAAGGAGAAGGAGAGCAATATTTGTGAGACATTTTCATTTGTAAGTGAACATTTACGGAAA  
TTCAATGATGCTCTCATTATCAGTGAAGATGCTCGCATCGAAGATGCTTTAGCCTACCTAAA  
TGAATTTTTCACAAATGTAAAAAATGGACCATATACAGAGCTGGAGAAGCAACTGACGGAG  
AAATTTCAAGAGAAAGAACAAGAGCTGACTGCCCTTTCAAAAGATGAATCAAATGAGAATCC  
AAAGTTGGAAGAGCTCACTTGATCCTGGATGAAGCATACCGCTATAACCCAGAGACTCGC  
ACTATTCTCTTTGCCAAGACAAGAGCCTTAGTAGCTGCTTTGAAGAAGTGATAGACGCAA  
ACCCTGTACTTAGCCACATAAAGACAGATGTGTTGATGGGTAAGGGAAGAAGAGATCATAA  
AACAGGTATGACCCTGCCAATGCAGAAGGGTGTACTGGATGCATTCAGAAATGACAAAGAC  
ATCAGATTGCTAGTTGCTACATCTGTTGCTGATGAAGGCATTGATATTAGCGAGTGCAACCT  
TGTGGTTCTCTATGAATACTTCGGAAATGTCACCAAATGATCCAAGTCAGAGGTCGTGGA

AGGGCAAAGACAGCAAGTGCATCCTTGTGACAAGCAAAACAGAAGTGGTTGAGAATGAA  
AAACTAAACCGTTACAAGGAAGAAATGATGAATGCAGCTATTGAAAAGCTACAGAACTGGG  
ATGAAACAACATTTGCAAGAACGATACATCAGCTGCAAATTAAGGAAAAGATACTACGGGA  
TTCCAGAAAGAAAGAAACAAAACATAAAGTAGTGGAAGGGAAAAAAAACCTTTTGTGTGGA  
AAATGCAAAGCATATGTCTGCAGTACAGATGACATCAGAATTATAAAGGAATCCCATCACAC  
TGTCTAGGTGACGCATTCAAGGAGCGTTATATAACAAAGCCCCACAGGAAACCGGTTTCTAG  
TTTGATGGTTTTTGAGAAAAAAGCAAGATGCATTGCCGAAATACTGAGTGCCAGCATGACT  
GGGGGATCACAGTGAAGTACAAGACATTTGATAATCTACCAGTGATCAAAATCAAAGCTTT  
GTACTAGAGAATGTTGAAACTGGGACACAAATGGATTTTCAGAAATGGAAAAGTATTAATTT  
GTCTTTGAAGAATTTTGATGAAGAAACATCCATCTGA

>accipiter\_nisus-riplet

ATGGCTGCCGCGGTGGACCTGGAGCGGCTCCTGGGAGCCGTGGACCTGAGCTGCTCTTG  
CTGCCTGCAGTACTTCACGGAGCCCGTGCGGCTCACGGGCTGCAGCCACAGCTTCTGCC  
GGCCCTGCATCGTCGAGTACTGCAAGGGGAGGCAGCGCGCCGGCTGCCCGCTCTGCCG  
GGAAGGCTTCCAGCTGAAGGACCTGCGGCCCAACCGGGAAGTGGCCGCTTTGGTGAGCT  
TAATCCTGCAGGAGGTGAAGGAAGAAGGGCTGGAAACACGGGATGAACCGAAACCTCC  
GGAGCTGTTGCCTGCAACGACCGGAGCTCGGCGGGGCGACCTGGGAAGCAGGAGGACG  
AGATATGGGACATCTCCAAGCAACTAGAAATGACTATAGAGACCATCCATCTCTTGAGGAA  
CGATCTCAGTAAAACAAAGGAATATACATCTCAGATCAAAAGCCAGATTACTAAAGATTTCT  
GTTGCATGAAGGAATATGTTGAAAGACAGGAGAGGAACACACTAACATTTATTGAACAAGA  
GCAAAAAGCAGCTCAACAGAAAATTGAAGAGACTATTCACCAGCTCTGTGTTGAAGTGGAC  
AACCTCACAGACATCCAAGCCCAACAAGTGACTTACCTGAGAGACATAGTTACAAAGGCT  
TACCTTCAACAAGGAATCAAATTACACTTGATGAGAAGCTTAATGTTGTCAAAGTGCTGTA  
GAAGATCTTAAGAGAAAGATGGAAATTTTAATTTTGGAGAAATATTCTTGGAAGTTCCCACC  
AGTGCCACCTCCAGACTTGCATCAGGAGACAAGTGTCTGCTCATTACCTCCAGAGTCTGCA  
GCTAAAAATCCAGAACCAATGATTTCAAGCCAGTTTTCTCAGTGGGCAGATGATGTGACTTT  
TGATCTCACAAGAGTATATAAGCGCTTAGCAATCACAGCCCAGAACAGGAAAGTAATGGTT  
TCCAGCTACCCAATGATTATGAACCATTGCCCAACAGATTCTGCATCAGCCAAGTGATGT  
GTTTCGAGAGCTTCTCTACTGGGTGCCACTACTGGGAAGTAATTACCAAGGATAGTGATGG  
ATGGGCTGTTGGAGTTGCTTATGGAACAATTGGTAAAAGGGACAAATTAGGAAGAACAGAG  
CATTCTGCTGTGTAGAATGGCTAGGTTCCAAAAAGCAGCTGTCAGCATGGCATAAGGATC  
AAGAGACATTGTTACACAAGGATAAACCATTGAAGGTTGGAGTTCTTCTGGAGCTACAAAA  
GAAGACTGTGTCATTTTACTCTATCACTGACAAAGCAATGCTTTTGCATACTTTTGAATCAA  
TACCTCAAATCCTCTTTACCCTGCTTTCTGGCTATATAGTCTAGAAAGAAATGGATCTTTAAC  
TATAAATCATACGAACAGGAGATAA

>acridotheres\_javanicus-riplet

ATGGCCGTTGTCATCGAGCTCGAGCGGCTGCAGCGCGTCCTGGAGCTGCACTGCTCCTG  
CTGCCTGCAGCTCTTCGCGGAGCCCGTGCGGCTCAYGGGCTGCGGCCACAGCTTCTGCC  
GGGGCTGCATCCTCCGCTACTGCGCGGGGCGGCCCGCGTCCTGTGCCCGCTCTGCCG  
GCGCCCCCTTTGAGTCCCAGCACCTGCGGCCCAACCGCGAGCTGGCCGCGCTGCTCAGCC  
TCATCCCGCGGGAGCTGCAGGAAAGCTTGGAAACACAGGAGGAGCCGGAGCCCCGTGGA  
GCTGCTGCCTGCAACGACCTGAGCCGGGCGAGGCGGGGACCTGGGGAGAAGGAGGAAG  
AGATATGGGAGAGTTCCAGGCAACAAGAAATAACTGCAGAGACTGTCCACCTGTTGAGGA  
AAGATCTCAATAAAACAAAGGAATATACATCTCAGATCAAAAGCCAGATTACTAAATATTTCT



GTTACATGAAGGAATATGTTGAAAGACAGGAAAGAAACACACTGATGTTTCATTGAACAAGA  
GCAAAAAGCTGCTCAACAGAAAAATTGAAGAGACTATTACCAGCTCACAGACATCAAAGCC  
CAAAC TAGTGATTTATCTGAGAGGCAGAGATATGAAGGCTCACCTTCAACAATTTATAAAAT  
TACACTTGATGAGAAGCTTAATGTTGTCAAAAGTGCTGTAGAAGATCTTAGAAAAAGTTGG  
AAATTTTACTCTTGGAGAATTATGCTCAGCAACTCCCACCAGTGCAACCTCCAGACTCGTAT  
CAGGAGCCAAAGTGTCTGCTCATCATCTCCAGGGGCTGCAGCTGAAAGTCCTGAACCAAGC  
ATTTCCAGCCCCGTTTTCTCTCTGGGCAGAGGATGTGACTTTTGACCCCAACAAGAGTACACG  
AGCGCTTGGCACTGACAGCCCAGAACAGGAGAGTGATGGTTTCCAGCCATCCAACCACTT  
ATCAACCATCACCCAAAAGATTCTGCATCAGCCAAGTGATGTGTTACAGGGCTTCTCTAC  
TGGGAGCCACTACTGGGAAGTAATTACCAAGGACAGTGATGGATGGGCTGTTGGAGTTGC  
TCATGAAATGATTGGTAAAAGGGAGAAATTGGGAAGAACTGAGCATTCTGGTGTGTAGAA  
TGGCTGGGTCCTAAAAACAGCTGTCAGCATGGCATAAGGATCAGGAAACATTATTACAGA  
AGGACAAACCACTGAAGGTTGGAGTTTTCTGGAGCTACAAAAGAAGACCGTGTCAATTTTA  
CTCCATCACTGACAAAGAAATGCTTTTGCACACCTTTGAAATCAGTACCTCAAATCCTCTCT  
ACCCTGCTTTCTGGCTGTTCACTCTAGAAAGAAATGGATCTTTAACTATAAGTCAGCCAAAC  
AGGAGATAA

>agapornis\_roseicollis-riplet

ATGGCTGCCGCGGTACCTCTGAGGCGGCTGCTGCAAGCGGTGGAGCTGAGCTGCGCCTG  
CTGCCTGCAGAAGTTCGCGGACCCGGTGC GGCTCCCGGTCTGCGGCCACAGCTTCTGCC  
GGCCCTGCATCCTCCAGTACTGCAAGGGGAAGCAGCGCGCAGCCTGCCCGCTCTGCCGT  
AAGGTCTTCGAGCAGAGGGACCTGCAGCCCAACCGGGAGCTGGCCGCTTTGGTGAACCT  
GGTTCTGCAGGAGGTAAAGGAAGAAGACTTGGAAGAAGAGAATGAACTGAAGCTCTCCGC  
AGCTGTTGCCTGCAATGGCCGGAGCTCGGCGGGGCGGCGACATAGGAACAAGGAGGAAG  
AGATACAGGACATCTCGAAGGAACTGGAAGTGACTATAGAGACCATCCACCTCTTGAGAGA  
AGAGCTTGGTAAAACGAAGGAATATACATCTCAGATCAAAAGCCAGATTACAAGAGATTTCA  
GTTGTATGAAGGAATATGTTGAAAGACAGGAGAGACACACACTGGTGTTCATTGAACAAGA  
GCAAAAAGCAGCTGAACAGAAAAATTGAAGAGACTATTCAACAGCTCTGCATTGAAGTGAAC  
AGGCTCACAGACATCACAGATGAAACAAGCACCCCTACCTGAGAGACATAAGTACAGAGACT  
TGTCTTCAATAATGGATAAGATTACACTTGCTGAGAACTGAATGTTGTCAAAAGTGCTGTA  
GAAGTTCTTAAGAGAAAAGTTGGAAAATTTGCTTTTGGAGAAATACCCTGAGCAGTTCCCATC  
AGTGGAACCAGAGTTGTGTCAAGAGACAAGTGCCTGCTCCTTATCTCCAGAGCCTGCAGTT  
AAAAGTCCAGAACGAGTGAATTCAAGCCGTTTTTCCCAGTGGGAAGATGATGTGACTTTTG  
ATCTCAGAAGAGTCTATGAGCGCTTAGCAATTACAGCCCAGAACAGAAAAGTCATGGTTTC  
CAGCCACCCAACTGACTATGGACCGTCGCCCAATAGATTCTGCATCAGCCAAGTGATGTGT  
TCACAGAGCTTCTCTACTGGGTGCCACTACTGGGAAGTAATTACCAAGGACAGTGATGGAT  
GGGCTGTTGGAGTTGCTCGTAAAATGATTGGTAAAAGGGAAAAGTTAGGAAGAACAGAGC  
ATTCTGGTGTGTGAATGGCTAGGTCCCAAAAAGCAGCTGTCAGCATGGCACAGGAATC  
AAGAAACATTATTACAAAAGGATAAACCACTGAAGGTTGGAGTTTTTCTGGAGATACAGAAG  
AAGACCGTGTCAATTTTACTCCATCACTGACAAAGAAATGCTTTTGCATACTTTTGAAATCAG  
TACCTCAAATCCTCTTTACCCTGCTTTCTGGCTATATGGCCTAGAAATAAATGGATCTTTAA  
CTATAAGTCACACAAATGTGACATAA

>alca\_torda-riplet

ATGGCGGCTGCTGTTGGGCTGGAGCGGCTGCTGGGCGCCGTGGAGCTGAGCTGCACTTG  
CTGCCTGCAGTTCTTCAGGGACCCGGTACGGCTCTCGGGCTGCACCCACAGCTTCTGCCG

GCCCTGCATCCTCCGGTACTGCGCGGGGAGGCAGCGCGCTGGCTGCCCCGCTCTGCCACG  
AGGGCTTCGAGCTGAAGGACCTGCGGCCCACTGGGAGCTGGCCGCTTTGGTGAGCCTG  
ATCCACAGGAGGTAAAGGACGAAGAGCTGGAAACAGGGGATGAACTGAAACCTCTGGA  
GCCGTTCCCTGCAGCGACCGGAGCTCGGCACGGCCGCGGCCCGGGCAGAAGGAGGAAG  
AGGTATGGGACATCTCCGAGCAAGAGACCACCCAGCTCTTGAGGAAAGATCTGAGTAAAG  
CAAAGGAATACACATCTCAGATCAGAAGCCAGATTACTAAAGATTTCTGTTGCATGAAGGA  
GTATGTTGAAAGACAGGAGAGAAACACACTGATGTTTCATTGAACAAGAGCAAAAAGCAGCT  
CAAGGGAAAACTGAAGAGACTATTCACCAGCTCTGTGGTGAAGCAAACAAGCTCACAGACA  
TCAAAGCCCCAAACGAGTAACTTACCTGAGAGACAGAGGTACAAAGGCTCACCTTCAACAAT  
GACTAAAATGACACTTGATGAGAAGCTTAATGTTGCCAAAACCTGCTGTACAAGATCTTAAGA  
GAAAGTTGAAATTTTACTTCTGGAGTATGCTCAGCAGTTCCCACCAGTGCAACCTCCAGA  
GTTGCCTCAGGAGACAAGCGTCTGCTCATTACCTCCAGCATCTGCAGCTAAAAATCCAGAA  
CCCATGATTTCAAGCCAGTTTTCCCAGTGGGCAGCTGATGTGACTTTTGATGTGGAAGAG  
TATATGAGCGCTTAGCGATCGCAGCCCAGAACACGACAGTAACAGTTTCCAGCTCCCCGA  
CTGATTACGAGCCATCGCCCAACAGATTCTGCATCAGCCAAGTGACGTGTTCCAGAGCTT  
CTCTGCGGGGTGCCACTACTGGGAAGTAATTACCAAGGCCAGCGATGGGTGGGCTGTTG  
GAGTTGCTCATGAAATGATTGAAAAAGGGACGAATTAGGAAGAACGGAGCATTCCCGGT  
GTGTAGAATGGCTAGGTCCCAAAGAGCAGCTGTCAGCATGGCATAGGGATCAAGAAACAT  
TATTATGCAAGGATAAACCGTTGAGGGTTGGAGTTTTGCTGGAGCTACAAAAGAAGACCGT  
GTCTTTTTACTCCATCACTGACAAAGAAATGCTTTTGCATGCCTTTGAAATCAATACCTCACA  
TCCTCTTTACCCTGCTTTTCTGGCTATATAGTCTAGAAAGAAATGGATCTTTAACTCTAAGTCA  
CACAAACAGGAGGTAA

>alectura\_lathamiriplet

ATGGCTGCTGCGATCGACCTCGAGCGGCTGCAGGCCTATGTGGACCTGAGCTGCACTTTC  
TGCCTGAAGTACTTCACGGACCCCGTGCGGCTCGCGGGCTGCACTCACAGCTTCTGCCG  
GTCCTGCATCACCGCGTACTGCAAGGGCAGGCAGCGCGCCCAATGCCCGCTCTGCAGAG  
AGGGCTTCGAGCTGAAGGACCTGCGGGCCAACCGAGAGCTGGCTGCTCTGGTGAGCTTA  
ATCCCCAAAGAGGAGAAGGAAAAAGACTTGGAGACCTGGGATGAACCTAGATCCTCTGGA  
GATGGTGCCTGCGGCGGACAGAGCTCTGCAGAGCAGAGACCTGGGGAGAAGGAGGAACA  
GATATGTAACATATCCAAGCAACTGGAAGTGGCTGAAGAGACCATCAGCATCTTGAGGAAG  
GATCTCACTAAACAAAGGAATATACATCTCAGATCAAAAGCCAGATTACTAAAGATTTCTG  
TTGCATGAAGGAATACATTGAAAGACAAGAGAAAAACACACTGGTGTTTCATTGAACAGGAG  
GAAAAAGCAGCTCAGCAGAAAACTGAAGAGACTATTCACCAGCTCTGTGTTGAAATGAACA  
AGCTTATAGAAATCAAAGCCCCAACAGAGAAAGTACTGGGAAGTGATGACATGAATTGGCA  
GAATAGTAACTTACTCGATAGAGAGAGGTACAAAGGCTTACCTTCAACAATGAATAAAATTA  
CAGTTGATGAGAAGCTTAATGTTGTCAAGAGTGCTGTAGAAGATCTGAAGAGAAAGTTGGA  
ATTTTTACTTTTGGAGAAATACCCTCAGCAGTTTGCACCAGTACAACCTCCAGACTTATATC  
AGGAGACAAGTGTCTGCTCATTATCTGCGGAGTCTGCAGCTAAAACCTCCAGAACCAATGAT  
TTCAAGCCAGCTTTCTCAGTGGACAGATGATGTGACTTTTGATTTACCAGAGCATATGACC  
ACTTAGCAATCACAGCTCAAAACAGGAAAGTCATGGTTTCCAGCTACCCAAATTATTATGAA  
CCATACCCCAAGAGATTTTCAATCAGCCAAGTGATGTGTTCCAGGGGCTTCTCTTCTGGGT  
GCCACTACTGGGAAGTAATCACCAGGACAGTGATGGATGGGCTGTTGGAGTTGCTCATG  
AAATGATTGGTAGAAAGGACAGATTAGGAAGAACAGAACATTCTGGTGTGTAGAATGGAT  
AGGTCCCCAAAAGCAGTTGTCAGCATGGCACAGGAATGAAGAAACACCATTACACAATGAT

AAACCATTGAAGGTTGGAGTTTTCTGGAGCTACAAAAGAAGACTGTGTCATTTTACACCAT  
CACTGACAAAGAAATGCTTTTGCATACATTTAAAATCAATACCTCAAATCCTCTTTATCCCGC  
TTTCTGGCTCTACAGTCTAGATAGAAAGGGATCTCTAACTATAAGTCACACAAACAGGAGG  
TAA

>amazona\_aestiva-riplet

ATGGCTGCCGCGGTGCCTCTGGGGCGGCTGCTGGGCGCGGTGGAGCTGAGCTGCGCCT  
GCTGCCTGCAGCACTTCGCGGACCCGGTGC GGCTTCGGGGCTGCGGCCACAGCTTCTGC  
CGGCCCTGCATCNTCCAGTACTGCAAGGGGAAGCAGCGCGCCGCTGCCCGCTCTGCCG  
GGAGGGCTTCGAGCTGAAGGACCTGCGGCCCAACCGAGAGCTGGCCGCTTTGGTGAACC  
TTGTCCGGCAAGAGGTAAAGGAGGAAGAGTTGGAAGCACAGAATGAACCGAAGCCCCCTG  
CGGCAGTCGCCTGCAACGACGAGAGCTCGGCGGGACGGCGACATGGGGACAAGGAGGA  
AGAGATACAGGACATCTCNAAGGAAGTGGAAAGTACTATAGAGACCATCCACCTCTTGAGA  
GAAGAGCTCNGTAAAACAAAGGAATACACATCTCAGATCAAAAGCCAGATTACAAGAGAGT  
TCAGTTGCATGAAGGAATATGTTGAAAGACAGGAGAGACACACACTGGTGTTCATTGAGCA  
AGAGCAAAAAGCAGCTGAACAGAAAATTGAAGANGCTATTCAGGAGCTCTGCATTGAAGTG  
AACAGGCTCACAGACATCACAGCCGAAACAAGCACCCCTAACTGAGAGACATAGGTACAGA  
GACTTGCCTTCAATAATGGATAAAATTGCACTTGATCAGAAACATAATGTTGTCAAAAGTGC  
TGTACAAGTTCTTAAGAGAAAGTTGGAAATTTTGCTTTTGGAGAAATACCCTGAGCAGTTCT  
CACCAGAGCAACCANCAGACTTGTATGAAGAGACAAGTGCCTGCTCCTTATCTCCAGAGTC  
TGCAGCTAAAAGTGCAGAGCCAGTGAATTCAAGCCGTTTTTCCCAGTGGGCAGATGATGTG  
ACTTTTGATCTCAGAAGAGCCTATGAGCGCTTAGCAATCACAGCCCAGAACAGGAAAGTCA  
TGGTTTCCAACCACCCAAGTACTATGGACCATCGCCCAANAGATTCTGCATCAGCCAAGT  
GATGTGTTACACAGAGCTTCTCTACTGGGTGCCACTACTGGGAAGTAATTACCAAGGACAGT  
GATGGATGGGCTGTTGGAGTTGCTCATAAAATGATTGGTAAAAGGGAAAAATTAGGGAGAA  
CAGAGCATTCTGGTGCCTGGAATGGCTAGGTCCCAGAAAGCAGCTGTCAGCATGGCATA  
GGAATCAAGAAACATTATTAGACAAAGATAAACCCTGAGGGTTGGAGTTTTCTGGAGCT  
ACAGAAGAAGACCGTGTCATTTTACTCCATCACTGACAAAGAAATGCTTTTGCATACTTTTG  
AAATCAGTACCTCAAATCCTCTTTACCCTGCTTTCTGGCTGTATGGCCTAGAAATAAATGGA  
TCTTTAACTATAAGTCACACAAACGGGATATAA

>anas\_platyrhynchos-riplet

ATGGCTGTCCCAGCGGAGCTCGGTGCGCTGCTGGCAGACGTGGAGCTGAGCTGCTCCTG  
CTGCCTGCAGTACTTTACCGAGCCCGTGC GGCTGGCGAGCTGCAGCCACAGCTTCTGCC  
GGTCCTGCATCGACACCTACTGCAGGGGGAGGGCGGCGCGCCCCCTGCCCGCTCTGCCG  
GGAGGACTTCGAGCCGAAGGACCTGCGGCCCAACCGGGAGCTGGCCGCCCTGGTCAGC  
CTGATGCTGGGCGGGGGAAGGGGCGAGGGGCTGGGGGCGTGGGACCAGCCACAGCCT  
CTGGAGATGGTGCCGGCGGTGGATGCAGCTCTGCGTGGCGGCGACCCGGGGAGAAGGA  
GGAACAGATCCGTGACATCTCTAAGCAACTGGAATAACTAAAGAGACCATCAACGCCTTG  
AGGAAGGATCTCAGTAAAACAAAGGAATATACATCTCAGATCCTAAGCCAGATTACTGAAG  
ACTTCTGTTGCATGAAGGAATACATTGAAAGACAAGAGGAAAACACACTGATGTTTCATTGAA  
CAGGAGCAAAGAGCAGCTCGACAGAAGATTGTGCAGACTATTCACCAGCTCTGTGTTGAAA  
AGTACAAACTCATCGACATCAAAGCCCAGATGGAGAAAGGATTAGAAAGTGATGAAATGGA  
GTGGCAGACTAGTAACTTACTTGAGAGAGGGGGAGGCTCACCTTCAACAATGCATAAATTT  
ACAATTGATGAGAAGTTTAATGTTGTCAGAAGTGCTGTAGGAGATCTTAAGAGAAAGTTGG  
AAATTTTACTTTTGGAGGAATACCCTCAGCAGTTCCCACCAGCACAAATCTCCAGACTTACAC

CAAGAGACAAGTGTCTGTTCAATTATCTTCAGAGTCTGCAGCTAAAAGTCCAGAACCAAGCA  
TTTCGAGCCAGTTTTCTCGGTGGGCAGATAATGTAACTTTTGATCTCACCACAGCATATGAC  
CGCTTAGCCATCACAGATCAGAACAGGAAAGTAATGGTGTCCAGCAACCCAACTTACTATG  
AACCATCACTCAAGAGATTCTGCATCAGCCAAGTGTTGTGTTCCCAGGGCTTCTCTACTGG  
CTGCCACTACTGGGAAGTAATTACCAAGGACAGTGATGGATGGGCTGTTGGAGTTGCTCG  
TGGAACGATTGGTAGAAGGGACAGATTAGGAAGAACAGAGAGTTCCTGGTGCGTAGAATG  
GGTAGGTCCCCAAAAGCAGTTGTCAGCATGGCACAGGAATCAAGAAACACTATTACGCAAT  
GATAAACCATTGAAGGTTGGAGTTTTCTGGAGCTACAGAAGACAGTGTCATTTTATGCCAT  
CACTGACAGAGAAATGCTTTTGCATACATTTGAAATCAATAACTCAAATCCTCTTTATCCTGC  
TTTCTGGCTATACAGTCTAGATAAAAATGGATCTTTAACTATAAATCACATAAACAGGAAGTA  
A

>anser\_cygnoides-riplet

ATGGCTGCCCAGGCGGAGCTGGGTGCGCTGCTGGCAGACGTGGAGCTGAGCTGCTCCTG  
CTGCTTGCAGCACTTCACCGAGCCCGTGCGGCTGGCGAGCTGCAGCCACAGCTTCTGCC  
GGCCCTGCATCGCCGCCTACTGCAGGGGGAGGCAGCGCGCCACCTGCCCGCTCTGCCG  
GGAGGGCTTCGAGCTGAAGGACCTGCGGCCCAACCGGGAGCTGGCCGCCCTGGTCAGC  
CTGGTGCTGAACGGGGGAAGGGGCGAGGGGCTGGGGGCGTGGGACGAGCCCAGACCCCT  
CTGGAGATGGTGCCGGCGGTGGATGGAGCTCTGCGGGGCGGCGACCCGGGGAGAAGGA  
GGAACAGATACGTGACATCTCCAAACAACCTGGAATAACTGAAGAGACCATCAACATCTTG  
AGGAAGGATCTCAGTAAAACAAAGGAATATACATCTCAGATCCAAAGCCAGATTACTAAAG  
ACTTCTGTTGCATGAAGGAATACATTGAAAGACAGGAGGCAAACACACTGATGTTCAATTGA  
ACAGGAGCAAAAAGCAGCTCAACAGAAGATTGAAGAGACTATTCACCAGCTCTGTGTTGAA  
AAGAACAACCTCATAGACATCAAAGCCCAGATGGAGAAAGAATTAGGAAGTGATGAAATGA  
GGTGGCAGAATAGTAACTTGCTTGAGAGAGAGGGGAGGCTCACCTTCAACAATGCATAAATT  
TACAATTGATGAGAAGTTTAATGTTGTCAGAAGTGCTGTAGGAAATCTTAAGAGAAAGTTGG  
AAATTTTACTTTTGGAGGAATACCCTCAGCAGTTCCCACCAGTACAATCTCCAGCCTTATAT  
CAAGCGACACGTGTCTGCTCATTATCTTCAGAGTCTGCAGCTAAAAGTCCAGAACCAAGCA  
TTTCAAGCCAGTTTTCTCGGTGGGCAGATATTGTGACTTTTGATCTCACCACAGCATATGAC  
CGCTTTGCAATCACAGCTCAGAACAGGAAAGTAATGGTTTTCCAGCAACCCAACTTATTATG  
AACCATCACTCAAGAGATTCTGCATCAGCCAAGTGTTGTGTTCCCAGGGCTTCTCTACTGG  
GTGCCACTACTGGGAAGTAATTACCAAGGACAGTGATGGATGGGCTGTTGGAGTTGCTCG  
TGAAACGATTGGTAGAAGGGACAGATTAGGAAGAACAGAGGATTCCTGGTGTGTAGAATG  
GGTAGGTCCCCAAAAGCAGTTGTCAGCATGGCACAGAATCAAGAAACACTATTACGCAGT  
GATAAACCATTGAAGGTTGGAGTTTTCTGGAGCTACAGAAGACTGTGTCATTTTATGCCAT  
CACTGACAAAGAAGTGCTTTTGCATACATTTGAAATCAATACCTCAAATCCTCTTTATCCTG  
CTTTCTGGCTATACAGTCTAGATAAAAATGGATCTTTAACTATAAATCACATAAACAGGAAGT  
AA

>antigone\_vipio-riplet

ATGGCTGCTGCTGTGACCTCGAGCGGCTCCTGGGCGCCGTGGACCTGAGCTGCACTTT  
CTGCCTGCAGTACTTCACGGACCCCGTGCGGCTCACGGGCTGCACCCACAGCTTCTGCC  
GGCCCTGCATCATCGCCTACTGCAAGGGGAGGCAGCGATTGCGCTGCCCGCTCTGCCGG  
AAAGGCTTCCAGCTGAAGGACCTGCAGCCCAACCGGGAGCTGGCCGCTTTGGTGAACCTA  
ATCCCGCAGGAACTAAAGGAAAAAGAGTTGAAACACAAGATGAAACGAAACCCCTTCGGA  
GCTGTTCCCTGCAACGACCGCAGCTCGGCGGGGGGGCGACCTGGGGAGAAGGAGGAAG

AGATATGGGACATCTCCAAGCAACTAGAAACAACTGCAGAGACTATCCACCTCTTGAGGAA  
AGATCTCAGTACAGCAAAGGAATATGCATCTCAGATCAAAGCCAGATTACTAAAGATTTCT  
GTTGCATGAAGGAATATGTTGAAAGACAGGAGAGAAGCACACTGATGTTTCATTGAACAAGA  
GCAAAAAGCAGCTCAGCAGAAAATTGAAGAGACTATTACCAGCTCTGTGTTGAAGTGAAC  
GAGCTCACAGACATCAAAGCCCAAACGAGTAACTTACCTGAGAGACATAGGTACAAAGGCT  
CCCCTTCAACAATGAATAAAATTACACTTTCATGAGAAGCTTAATGTTGTCAAAGTGCTGTA  
GAAGATCTTAAGAGAAAGTTGGAAATTTTACTTTTGGAGAAATACGCTCGGCAGTTCGCAC  
CAGTGCAACCTCCAGATTTATATCAGGAGACAAGTGTCTGCTTATTATCTCCAGAGTCTGCA  
GCTAAAAATCCAGAACCAATGATTTCAAGCCAGTTCTCTCAGTGGGCAGATGATGTGACTT  
TTGATCTCACAAGAGTGTATGAGCGCTTAGCAATCACAGCCCAGAACAGGAAGGTAATGGT  
TTCCACCTACCCGACTGATATTGGACCATCACCCAAGAGATTCTGCATCAGCCAAGTGATG  
TGCTCACAGAGCTTCTCTACTGGGTGCCACTACTGGGAAGTAATTACCAAGGACAGTGATG  
GATGGGCTGTTGGAGTTGCTCATGAAATGATTGGTAAAAGGGACAAATTAGGAAGAACAGA  
GCATTCTGGTGTGTAGAATGGCTAGGTTCCAAAAAGCAGCTGTCAGCATGGCATAGGGA  
TCAAGAAACATTATTACAGAAGGAAAAACCATTGAAGGTTGGAGTTTTGCTGGAGCTACAAA  
AGAAGACCGTGTCAATTTTACTCCATCACTGACAAAGAAATGCTTTTGCATACATTTGAAATC  
AATACCTCAAATCCTCTTTACCCTGCTTTCTGGCTATATAGTCTAGAAAGAAATGGATCTTTA  
ACTCTAAGTCACACAAACAGGAGGTAA

>apaloderma\_vittatum-riplet-partial

GAGGAAGCGATACAGGACATCTCCAAGCAACTAGAAACGACTGCAGAGACCATCCATCTC  
TTGAGGGAAGATCTCAGTAAAACAAAGGAATATACGTCTCAGATCAAAGTCAGATTAGTAA  
AGATTTCTGTTGCATGAAGGAATATGTTGAAAGACAGGAGAGAAACACACTGATGTTTCATT  
GAACAAGAGCAAAAAGCAGCTGAAGAGAAAATTGAAGAGGCCATTCACCAGCTCTGTGTTG  
AAGAGACCAAGTTCGCAGACATCAGAGCCCAAGCGAGTAACTTACCTGAGAGACATGGGC  
ACAAAGGCTCACCTTCAACAATGTATAAAATTACACTCGATGACAAGCTTAATGTTGTCAA  
AGTGCTGTAGAGGATCTTAAGAAAACTTGGAAAATTTACTTTTGGAGAAATATGCTCAGCA  
GTTCCCACCAAGTGCAGCCTCCAGACTTAAATCAGGAGGGAAGTGCCTCCTCATTATCTCCA  
GAGTCAGCAGCTAAAAATCCAGAACCAACGATTTCAAGCCAGTTTTCTCAGTGGGCAGATG  
ACGTGACTTTTTGATCTCACAAGAGTGTATGAGCGCTTAGCAATCACAGCCCAGAGCAGGAA  
AGTAGTAGTTTCCAGCTACCCACAAGACTATGAACCTTCGCCCCAACAGATTCTGCATCAGC  
CAAGTGATGTGTTACAGAGCTTCTCTACCGGGTGCCACTACTGGGAAGTTGTTACCACGG  
GCAGCGATGGATGGGCTATTGGTGTGCTCATGAAACGATTGGTAAAAGGGACAAGTTAG  
GAAGAACGGAGCATTCTGGTGTGTAGAATGGCTTGGTCCCAAACAGCAGCTGTCAGCCT  
GGCACAGGGATCTAGAAACACTATTACACAAGGATAAACCATTGAAGGTTGGAGTTTTCT  
GGAGCTACCAAAGAAGACTGTGTGCTTTTACTCCATCTCTGACAAAGAAATGCTTTTGCATA  
CTTTTGAAATCAATACCTCAAGTCCTCTTTACCCTGCTTTCTGGCTATATGGTCTAGAAAGA  
AATGGATCTTTAACGATAAGTCACACAACCAGGAGATAA

>aquila\_chrysaetos-riplet

ATGGCTGCCGCTGTCGACCTCGAGCGGCTCCTGGGCGCCGTGGACCTGAGCTGCGCTTG  
CTGCCTGCAGTACTTCACGGAGCCCGTGCGGCTCACGGGCTGCAGCCACAGCTTCTGCC  
GCGCCTGCATCATCGAGTACTGCAAGGGGAGGCAGCGCGCCGGCTGCCCCGCTCTGCCGG  
GAAGGCTTCGAGCTGAAGGACCTGCGGCCCAACCGGGAGCTGGCCGCTTTGGTGAACCT  
AATCCTGCAGGAGGTAAAGGAAGAAGGGCTGGAAACACGGGATGAACCGAAACCCTCCG  
GAGCTGTTGCCTGCAACGACCGGAGCTCGGCGGGGCGAGCTGGGAAGCAGGAGGATGA

GATATGGGACATCTCCAAGCAACTAGAAATGACTATAGAGACCATCCATCTCCTGAGGAAA  
GATCTCAGTAAAACAAAGGAATATACATCTCAGATCAAAAGCCAGATTACTAAAGATTTCTG  
TTGCATGAAGGAATATGTTGAAAGACAGGAGAGAAAACACACTGATGTTTATTGAACAAGAG  
CAAAAAGCAGCTCAACAGAAAATTGAAGAGACTATTCACCAGCTCTGTGTTGAAGTGGACA  
AACTCACAGACATCCAAGCCCAAACAAGTGACTTACCTGAGAGACATAGTTACAAAGGCTT  
ACGTTCAACAAGGAATCAAATTACACTTGATGAGAAGCTTAATGTTGTCAAAAGTGCTGTAG  
AAGATCTTAAGAGAAAAGATGGAAATTTTAATTTTGGAGAAAAATTCTTGGAAGTTCCCACCA  
GTGCAACCTCCAGACTTGCTATGAGGAGACAAGTGTCTGCTCATTATCTCCAGAGTCTGCAG  
CTAAAAATCCAGAACCAGTGATTTCAAGCCAGTTTTCTCAGTGGGCAGATGATGTGACTTTT  
GATCTCACAAGAGTATATAAGCGCTTAGCAATCACAGCCCAGAACAGGAAAGTAATGGTTT  
CCAGTTACGCGACTGATTATGAACCATTGCCCAACAGATTCTGCATCAGCCAAGTGATGTG  
TTCGCAGAGCTTCTCTACTGGGTGCCACTACTGGGAAGTAATTACCAAGGACAGTGATGGA  
TGGGCTGTTGGAGTTGCTCATGGAACAATTGGTAAAAGGGACAAATTAGGAAGAACAGAG  
CATTCTGCTGTGTAGAGTGGCTAGGTCCCAAAAAGCAGCTGTCAGCATGGCATAAGGAT  
CAAGAAACATTGTTACACAAGGATAAACCATTGAAGGTTGGAGTTTTTCTGGAGCTACAAAA  
GAAGACTGTGTCATTTTACTCTATCACTGACAAAGCAATGCTTTTGCATACTTTTGAATCAA  
TACCTCAAATCCTCTTTACCCTGCTTTCTGGCTATATAGTCTAGAAATAAATGGATCTTTAAC  
TATAAATCATACGAACAGGAGATAA

>ara\_ararauna-riplet

ATGGCTGCCGCGGTGCCTCTGGGGCGGGCTGCTGGGCGCGGTGGAGCTGAGCTGCGCCT  
GCTGCCTGCAGCACTTCGTGGACCCGGTGCGGCTTCCGGGCTGCGGCCACAGCTTCTGC  
CGGCCCTGCATCCTCCAGTACGGCGGGGGGAAGCAGCGCGCCGCTGCCCGCTCTGCC  
GGGAGGGCTTCGAGCTGAAGGACGTGCGGCCCAACCGGGAGCTGGCCGCTTTGGTGAAC  
CTTGTCCGGCAAGAGGTAAAGGAAGAAGAGTTGGAAGCACAGAATGAACCGAAGCCCCCT  
GCGGCTGCTGCCTGCAACGATGAGAGCTCGGCGGGATGGCGACTTGGGGACGAGGAGG  
AAGAGATACAGGACATCTCGAAGGAACTGGAAGTGACTATAGAGACCATCCACCTCTTGAG  
AGAAGAGCTCAGTAAAACAAAGGAATACACATCTCAGATCAAAAGCCAGATTACAAGAGAT  
TTCAGTTGCATGAAGGAATATGTTGAAAGACAAGAGAGACACACACTGGTGTTTCATTGACC  
AAGAGCAAAAAGCAGCTGAACAGAAAATTGAAGAGACTATTCAGCAGCTCTGCATTGAAGT  
GAACAGGCTCACAGACATCACAGCCGAAACAAGCACCCCTAACTGAGAGACATAGGTACAG  
AGACTTGCCTTCAATAATGGATAAAATTGCACTTGATAAGAAACATAATGTTGTCAAAAGTG  
CTGTACAAGTTCTTAAGAGAAAGTTGGAATTTTGGTTTTGGAGAAATACCCTGGGCAGTTC  
CCACCAGTGCAACCACCAGACTTGTATCAAGAGACAAGTGCCTGCTCCTTATCTCCAGAGT  
CTGCAGCTAAAAGTCCAGAACCGGTGAATTCAAGCCGTTTTTCCAGTGGGCAGATGATGT  
GACTTTTGATCTCAGTAGAGTCTATGAGCGCTTAGCAATCACAGCCCCGAACAGGAAAGTC  
ATGGTTTCCAGCCACCCAAGTACTATGGACCATCGCCCAATAGATTCTGCATCAGCCAAG  
TGATGTGTTACAGAGCTTCTCTACTGGGTGCCACTACTGGGAAGTAATTACCAAGGACAG  
TGATGGATGGGCTGTTGGAGTTGCTCATAAAATGATTGGTAAAAGGGAAAAAATAGGAAGA  
ACGGAGCATTCTGTTGTGTGGAATGGCTAGGTCCCAGAAAGCAGCTGTCAGCATGGCAT  
AGGAATCAAGAAACGTTATTAGACAAAGATAAACCCTGAGGGTTGGAGTTTTCTGGAGC  
TACAGAAGAAGACCGTGTCATTTTACTCCATCACTGACAAAGAAATGCTTTTGCATACTTTT  
GAAATCAGTACCTCAAATCCTCTTTACCCTGCTTTCTGGCTGTATGGCCTAGAAATAAATGG  
ATCTTTAACTATAAGTCACACAAATGGGATGTAA

>aramus\_guarauna-riplet

ATGGCTGCTGCTGTCGACCTCGAGCGGCTCCTGGGCGCCGTGGACCTGAGCTGCACTTT  
CTGCCTGCAGTACTTCACGGACCCCGTGCGGCTCACGGGCTGCACCCACAGCTTCTGCC  
GGCCCTGCATCATCGCCTACTGCAAGGGGAAGCAGCGCGCCGGCTGCCCCGCTCTGCCGG  
AAAGGCTTCGAGCTGAAGGACCTGCAGCCCAACCGGGAGCTGGCCGCTTTGGTGAACCTTA  
ATCCCGGAGGAAGTGAAGGAAGAAGAATTGGAAACACATGATGAAACGAAACCCTCTGGA  
GCTGTTCCCTGCAACGACAGCAGCTCGGCGGGGGCGGCGACCTGGGGAGGAGGAGGAAG  
AGATATGGGACATCTCCAAGCAACTAGAAACAACTGTAGAGACTATCCACCTCTTGAGGAA  
GGATCTCAGTACAGCAAAGGAATATGCATCTGAGATCAAAAGCCAGATTACCAAAGATTTC  
TGTTGCATGAAGGAATATGTTGAAAGACAGGAGAGAAGCACACTGATGTTTCATTGAACAAG  
AGGAAAAAGCAGCTCAGCAGAAAATTGAAGAGACTATTCACCAGCTCTGTGTTGAAGTGAA  
CAAGCTCATAGACATCCAAGCCCAGACGAGTAGCTTACCTGAGAGACATAGGTACAAAGG  
CTCCCCCTTCAACAACGAATAAAATTACACTTCATGAGAAGCTTAATGTTGTGAGAAGTGCTG  
TAAAAGATCTTAAGAGAAAAGTTGGAAATTTTACTTTTGGAGAAATACGCTCAAAAGTTCTCA  
GCAGTGCAACCTCCAGACTTACATCAGGAAACAAGTGCCTGCTTATTATCTCCGGAGTCTG  
AAGCTAAAAATCCAGAATAATGATTTCAAGCCAGTTTTCTCAGTGGGCAGATGATGTGACT  
TTTGATCTTACAAGAGTGTATGAGCACTTAGCAATCACAGCCCAGAACAGGAAGGTAATGG  
TTTCCACCTACCCGACTGATTATGGACCATCATCCAAGAGATTCTGCATCAGCCAAAGTGAT  
GTGCTCACAGAGCTTCTCTACTGGGTGCCACTACTGGGAAGTAATTACCAAGGACAGTGAT  
GGATGGGCTGTTGGAGTTGCTCATGAAATGATTGGTAAAAGGGACAAATTGGGAAGAACA  
GAGCATTCTGCTGTGTAGAATGGCTAGGTTCCAAAAAGCAGCTGTCGGCATGGCATAGG  
GATCAAGAAACATTATTACAGAAGGAAAAACCATTCAGGTTGGAGTTTTGCTGGAGCTAC  
AAAAGAAGACCGTGTCATTTTACGCCATCACTGACAAAGAAATGCTTTTGCATACATTTGAA  
ATCAATACCTCAAGTCCTCTTTACCCTGCTTTCTGGCTATATGGTCTAGAAAGAAATGGATC  
TTTAACTCTAAGTCACACAAACAGGAGGTAA

>aratinga\_solstitialis-riplet

ATGGCTGCCGCGGTGCCTCTGGGGCGGCTGCTGGGCGCGGTGGAGCTGAGCTGCGTCT  
GCTGCCTGCAGCACTTCGTGGACCCGGTTCGGCTTCCGGGCTGCGGCCACAGCTTCTGC  
CGGCCATGCATCCTCCAGTACGGCGAGGGGAAGCAGCGCGCCGCTGCCCCGCTCTGCCG  
GGAGTGCTTCGAGCTGAAGGACGTGCGGCCCAACCGGGAGCTGGCCGCTTTGGTGAACC  
TTGTCCGGCAAGAGGTAAGGAAGAAGAGTTGGAAGCACAGAATGAACCGAAGCCCCCTG  
CGGCTGCTGCCTGCAACGATGAGAGCTCGGCGGGATGGCGACTTGGGGACGAGGAGGAA  
GAGATACAGGACATCTCGAAGGAACTGGAAGTGAATATAGAGACCATCCACCTCTTGAGA  
GAAGAGCTCAGTAAAACAAAGGAGTACACATCTCAGATCAAAAGCCAGATTACAAGAGATT  
TCAGTTGCATGAAGGAATATGTTGAAAGACAGGAGAGACACACTGGTGTTCATTGACCA  
AGAGCAAAAAGCAGCTGAACAGAAAATTGAAGAGACTATTCAGCAGCTCTGCATTGAAGTG  
AACAGGCTCACAGACATCACAGCCAAAACAAGCACCCCTAACTGAGAGACATAGGTACAGA  
GACTTGCCTTCAATAATGGATAAAATTGCCCTTGATAAGAAACATAATGTTGTCAAAAGTGC  
TGTACAAGTTCTTAAGAGAAAGTTGGAAATTTTGTCTTTGGAGAAATACCCTGGGCAGTTCC  
CACCAGTGCAACCACCAGACTTGTATCAAGAGACAAGTGCCTGCTCCTTATCTCCAGAGTC  
TGCAGCTAAAAGTCCAGAACCAGTGAATTCAAGCCGTTTTTCCCAGTGGGCAGATGATGTG  
ACTTTTGATCTCAGAAGAGTCTATGAGCGCTTAGCAATCACAGCCCGGAACAGGAAAGTCA  
TGGTTTCCAGCCACCCAACTGACTATGGACCATCGCCCAATAGATTCTGCATCAGCCAAGT  
GATGTGTTACAGAGCTTCTCTACTGGGTGCCACTACTGGGAAGTAATTACCAAGGACAGT  
GATGGATGGGCTGTTGGAGTTGCTCATAAAATGATTGGTAAAAGGGAAAAAATAGGAAGAA

CGGAGCATTCTGGTGTGTGGAATGGCTAGGTCCCAGAAAGCAGCTGTCAGCATGGCATA  
GGAATCAAGAAACGTTATTAGACAAAGATAAACCCCTGAGGGTTGGAGTTTTCTGGAGCT  
ACAGAAGAAGACCGTGTCAATTTTACTCCATCACTGACAAAGAAATGCTTTTGCATACTTTTG  
AAATCAGTACCTCAAATCCTCTTTACCCTGCTTTCTGGCTGTATGGCCTAGAAATAAATGGA  
TCTTTAACTATAAGTCACACAAATGGGATGTAA

>asarcornis\_scutulata-riplet

ATGGCTGTCCCAGCGGAGCTCGGTTCGGCTGCTGGCAGACGTGGAAGTGGAGCTGCTCCTG  
CTGCCTGCAGTACTTCACCGAGCCCGTGCGGCTGGCGAGCTGCAGCCACAGCTTCTGCC  
GGTCCTGCATCGACACCTACTGCAGGGGGGAGGCGGCGCGCCCCCTGCCCGCTCTGCCG  
GGAGGACTTCGAGCCGAAGGACCTGCGGCCCAACCGGGAGCTGGCCGCCCTGGTCAGC  
CTGGTGCTGGGCGGGGGAAGGGGCGAGGGGCTGGGGGCGTGGGACCAGCCACAGCC  
TCTGGAGATGGTGCCGGCGGTGGATGCAGCTCTGCGGGGCGGCGACCCGGGGAGAAGG  
AGGAACAGATCCGTGACGTCTCTAAGCAACTGGAAATAACTAAAGAGACCATCAACGCCTT  
GAGGAAGGATCTCAGTAAAACAAAGGAATATACATCTCAGATCCTAAGCCAGATTACTGAA  
GACTTCTGTTGCATGAAGGAATACATTGAAAGACAAGAGGAAAACACACTGATGTTTCATTG  
AACAGGAGCAAAGAGCAGCTCGACAGAAGATTGCGCAGACTATTCACCAGCTCTGTGTTG  
AAAAGTACAACTCATCGACATCAAAGCCCAGATGGAGAAAGGATTAGAAAGTGATGAAAT  
GGAGTGGCAGAATAGTAACTTACTTGAGAGAGGGGGAGGCTCACCTTCAACAATGCATAA  
ATTTACAATTGATGAGAAGTTTAATGTTGTGAGAAGTGCTGTAGGAGATCTTAAGAGAAAGT  
TGGAATTTTACTTTTTGGAGGAATACCCTCAGCAGTTCCCACCAGCACAATCTCCAGACTTA  
CACCAAGAGACAAGTGTCTGTTTCATTATCTTCAGAGTCTGCGGCTAAAAGTCCAGAACCAA  
GCATTTCAAGCCAATTTTGTGCGGTGGGCAGATAATGTAACTTTTGATCTCACCACAGCATAT  
GACCGCTTAGCAATCACAGCCCAGAACAGGAAAGTAATGGTGTCCAGCAACCCAACTTACT  
ATGAACCATCACTCAAGAGATTCTGCATCAGCCAAGTGTTGTGTTCCAGGGCTTCTCTAC  
TGGCTGCCACTACTGGGAAGTAATTACCAAGGACAGTGATGGATGGGCTGTTGGAGTTGC  
TCGTGGAACGATTGGTAGAAGAGACAGATTAGGAAGAACAGAGAATTCCTGGTGTGTAGAA  
TGGGTAGGTCCCCAAAAGCAGTTGTCAGCATGGCACAAGAATCAAGAAACACTATTACGCA  
ATGATAAACCATTGAAGGTTGGAGTTTTCTGGAGCTACAGAAGACCGTGTCAATTTTATGC  
CATCACTGACAGAGAAATGCTTTTGCATACATTTGAAATCAATACCTCAAATCCTCTTTATCC  
TGCTTTCTGGCTATACAGTCTAGATAAAAATGGATCTTTAACTATAAATCACATAAACAGGAA  
GTAA

>aythya\_fuligula-riplet

ATGGCTGTCCCAGCGGAGCTGAGTCGGCTGCTGGCAGATGTGGAGCTGAGCTGCTCCTG  
CTGCCTGCAGTACTTCACCGAGCCCGTGCGGCTGGCGAGCTGCAGCCACAGCTTCTGCC  
GGTCCTGCATCGACACCTACTGCAGGGGGGAGGCGGCGCGCCCCCTGCCCGCTCTGCCG  
GGAGGACTTCGAGCCGAAGGACCTGCGGCCCAACCGGGAGCTGGCCGCCCTGGTCAGC  
CTGGTGCTGGGCGGGGGAAGGGGCGAGGGGCTGGGGGCGTGGGACCTGCCACAGCCT  
CTGGAGATGGTGCCGGCGGTGGATGCAGCTCTGCGGGGCGGCGACCCGGGGAGAAGGA  
GGAACAGATCCGTGACGTCTCTAAGCAACTGGAAATAACTAAAGAGACCATCAACGCCTTG  
AGGAAGGATCTCAGTAAAACAAAGGAATATACATCTCAGATCCTAAGCCAGATTACTGAAG  
ACTTCTGTTGCATGAAGGAATACATTGAAAGACAAGAGGAAAACACACTGATGTTTCATTGAA  
CAGGAGCAAAGAGCAGCTCGACAGAAGATTGCGCAGACTATTCACCAGCTCTGTGTTGAA  
AAGTACAACTCATCGACATCAAAGCCCAGATGGAGAAAGGATTAGAAAGTGATGAAATGG  
AGTGGCAGAATAGTAACTTACTTGAGAGAGGGGGAGGCTCATCTTCAACAATGCATAAATT



TACAATTGATGAGAAGTTTAAATGTTGTCAGAAGTGCTGTAGGAGATCTTAAGAGAAAGTTGG  
AAATTTTACTTTTGGAGGAATACCCTCAGCAATTCCCACCAGCACAATCTCCAGACTTACAC  
CAAGAGACAAGTGTCTGTTTATTATCTTCAGAGTCTGCGGCTAAAAGTCCAGAACCAAGCA  
TTTCGAGCCAATTTTGTCTGGTGGGCAGATAATGTAACCTTTTATCTCACCACAGCATATGAC  
CGCTTAGCAATCACAGCTCAGAACAGGAAAGTAATGGTGTCCAGCAACCCAACTTACTATG  
AACCATCACTCAAGAGATTCTGCATCAGCCAAGTGTTGTGTTCCAGGGCTTCTCTACTGG  
CTGCCACTACTGGGAAGTAATTACCAAGGACAGTGATGGATGGGCTGTTGGAGTTGCTCG  
TGGAACGATCGGTAGAGAGACAGATTAGGAAGAACAGAGAATTCCTGGTGTGTAGAAATG  
GGTAGGTCCCCAAAAGCAGTTGTCTCAGCATGGCACAAGAATCAAGAAACACTATTACGCAAT  
GATAAACCATTGAAGGTTGGAGTTTTCTGGAGCTACAGAAGACCGTGTCATTTTATGCCA  
TCACTGACAGAGAAATGCTTTTGCATACATTTGAAATCAATACCTCAAATCCTCTTTATCCTG  
CTTTCTGGCTATACAGTCTAGATAAAAATGGATCTTTAACTATAAATCACATAAACAGGAAGT  
AA

>balearica\_regulorum-riplet

ATGGCTGCTGCTGTCGAGCTGGAGCGGCTCCTGGGCGCCATAGACCTGACCTGCACTTTC  
TGCCTGCAGTACTTCACGGAGCCCGTGCGGCTCACGGGCTGCACCCACAGCTTCTGCCG  
GCCCTGCATCATCGCCTACTGCAAGGGGAGGCAGCGATTTCGGCTGCCCGCTCTGCCGGA  
AAGGCTTCGAGCTGAAGGACCTGCAGCCCAACCGGGAGCTGGCCGCTTTGGTGAACCTTAA  
TCCCGCAGGAAATAAAGGAAAAAGAGTTGGAACGCAGGGTGAAACGAAACCCTCCGGAG  
GTGTTCCCTGCAACGACCGCAGCTCGGCGGGGCGGCGACCTGGGGAGAAGGAGGAAGA  
GATATGGGACATCTCCAAGCAACTAGAAACAACCTGTAGAGACTATCCACCTCTTGAGGAAA  
GATCTCAGTACAGCAAAGGAATATGCATCTCAGATCAAAAGCCACATTACTAAAGATTTCTG  
TTGCATGAAGGAATATGTTGAAAGACAGGAGAGAAGCACACTGATGTTTATTGAACAAGAG  
CAAAAAGCAGCTCAGCAGAAAATTGAAGAGACTATTCACCAGCTCTGTGTTGAAGTGAATG  
AGCTCACAGACATCAAAGCCCAAACGAGTAACCTTACCAGAGAGACATAGGTACAAAGGCTC  
CCCTTCAACAATGAATAAAATTACACTTCATGAGAAGCTTAATGTTGTCAAAGTGCCGTAG  
AAGATCTTAAGAGAAAGTTGGAATTTTACTTTTGGAGAAATACGCTCAGCAGTTCCCACCA  
GTGCAACCTCCAGATTTATATCAGGAGACAAGTGTCTGCTTATTATCTCCAGAGTCTGCAG  
CTAAAAATCTAGAACCAATGATTTCAAGCCAGTTTTCTCAGTGGGCAGATGATGTGACTTTT  
GATCTCACAAGAGTGTATGAGCGCTTAGCAATCACAGCCCAGAACAGGAAGGTAATGGTTT  
CCACCTACCTGACTGATTATGGACCATCACCCAAGAGATTCTGCATCAGCCAAGTGATGTG  
CTCACAGAGCTTCTCTACTGGGTGCCACTACTGGGAAGTAATTACCAAGGACAGTGATGGA  
TGGGCTGTTGGAGTTGCTCAGGAAATGATTGGTAAAAGGGACAGATTAGGAAGAACAGAG  
CATTCCTGGTGTGTAGAATGGCTAGGTTCCAAAAAGCAGCTGTCAGCATGGCATAGGGATC  
AAGAAACATTATTACAGACGGAAAAACCATTTGAAGGTTGGAGTTTTGCTGGAGCTACAAA  
GAAGACCATGTCATTTTACTCCATCACTGACAAAGAAATGCTTTTGCATACATTTGAAATCA  
ATACCTCAAATCCTCTTTACCCTGCTGTCTGGCTATATAGTCTAGAAAGAAATGGATCTTTA  
ACTCTAAGTCACACAAACAGGAGGTAA

>brachypteracias\_leptosomus-riplet

ATGGCTGCCGCTGGCGGCATCGAGCAGCTCCTGGGCGGGCTGGAGCTGAACTGCGCCTG  
CTGCCTGCAGCCCTTCACGGAGCCCGTCCGGCTGCGGGGCTGCGGGCCACAGCTTCTGCC  
GGGCCTGCATACCCAGTACTGCAGGAGCCGGCAGCGCACCGGCTGCCCGCTCTGCCGG  
GAGCCCTTCGAGCTCAAGGACCTGCGGCCCAACTGCGAGCTGGCGGCCTTGGTGAAGCTT  
GATCCCGCAGCTGGTCAAGGAAGAGGACTGCAAAACGCAGGATGAACCGAACCCCCCG

GAGCTCTCGCTTGTGGCGACCGGAAGGCGGCGGGGCGGCGACCTCAGGAGAAGGAAGA  
AGAGATATGGGACATCTCCAAGCAAATTGAAATGACTGCAGAGACCATCCACCTCTTGAGG  
AATGATCTCAGTAAAGCAGAGGAATACGCATCTCAGATCAAAAAGCCAGGTTACTAAAGATT  
CAGTTACATGAAGGAATATGTTGAAAGACAGGAAAGAAACACACTGATGTTCAATTGAACAA  
GAGCAAACAGCAGCTCAACAGAAAGTTGAAGAGACTATTCACCAGCTCTGTGTTGACATGA  
ACGAGCTCCTAGACATCAGTGCCCAAACAAGTAACTTACCTGAGAGACACAAACGCTCACC  
TTTAACAATGAATAAAATTACACTCAATGAGAAGCTTAATGGGGTCAAAAAGTGCTGTAGAAG  
ATCTTAAGAGAAAAGTTGGAAATTTTACTTTTCGGATCAATACACTCAGCAGTTCTACCAGTG  
CAACCTCCAGACTCACTCCAGGAGACAAGTGTCTGCTCATTATCTCCAGAGGCTGCAGCTC  
AGGCTCCAGAAGCAATGACTTCAAGCCAGTTTTCTCAGTGGGCAGACGATGTGACTTTTGA  
TCTCACGAGAGTACATGAGCGCTTAGCGATCACAGCCCAGAACAGGAAGGTAACAGCTTC  
CAGCTGCCCCGACTAATTATGAACCATCATCACCCAACAGATTCTGCATCAGCCAAGTGATG  
TGTTACAGAGCTTTTCTACTGGGTGCCACTACTGGGAAATAATTACCAAGGACAGTGAAG  
GATGGGCTGTTGGAGTTGCTCATGAAATGATTGGTAAAAGGGAGAAATTAGGAAGAACGG  
AGCATTCTGGTGTGTAGAATGGCTAGGTTCCAAAAAGCAGCTGTCAGCATGGCACAGGG  
ATCAAGAAACAATATTAGACAAGGATAAACCATTGAAGGTTGGAGTTTTCTGGAAGTCCA  
AAGAAGTCCGTGTCATTTTACTCCATCGCTGACAAAGAAATTCTTTTGCATACTTTTGAAATC  
AATACTTCAAGTCCTCTTTACCCTGCTTTCTGGCTGTATAGTCTAGAAAGAAATGGATCTTT  
AACTCTATGTCACACAAACAGGAGCTAA

>branta\_canadensis-ripley

ATGGCTGCCCAGGCAGAGCTGGGTGCGCTGCTGGCAGACGTGGAGCTGAGCTGCTCCTG  
CTGCCTGCAGTACTTCACCGAACCCGTGCGGCTGGCGAGCTGCAGCCACAGCTTCTGCC  
GGCCCTGCATCGCCGCCTACTGCAGGGGGAGGCAGCGCGCCACCTGCCCCTGCTGCCG  
GGAGGGCTTCGAGCTGAAGGACCTGCGGCCCAACCGGGAGCTGGCCGCCCTGGTCAGC  
CTGGTGCTGAACGGGGGAAGGGGCGAGGGGCTGGGGACGTGGGACGAGGCCAGCCCT  
CTGGAGATGGTGCCGGCGGTGGATGGAGCTCTGCGGGGCGGCGACCCAGGGAGAAGGA  
GGAACAGATACGTGACATCTCCAAACAAGTGAATAACTGAAGAGACCATCAACGTCTTG  
AGGAAGGATCTCAGTAAAACAAAGGAATATACATCTCAGATCCAAAGCCAGATTACTAAAG  
ACTTCTGTTGCATGAAGGAATACATTGAAAGACAGGAGGAAAACACACTGATGTTCAATTGA  
ACAGGAGCAAAAAGCAGCTCGACAGAAGATTGAAGAGACTATTCACCAGCTCTGTGTTGAA  
AAGAACAAGTCAATAGACATAAAAGCCCAGATGGAGAAAGGATTAGGAAGTGATGAAATGA  
GGTGGCAGAATAGTAACTTGCTTGAGAGAGAGGGAGGCTCACCTTCAACAATGCATAAATT  
TACAATTGATGAGAAGTTTAATGTTGTCAGAAGTGCTGTAGGAAATCTTAAGAGAAAGTTGG  
AAGTTTTACTTTTGGAGGAATACCCTCAGCAGTTCCCACCAGTACAATCTCCAGCCTTATAT  
CAAGAGACACGTGTCTGCTCATTATCTTCAGAGTCTGCAGCTAAAAGTCCAGAACCAAGCA  
TTTCAAGCCAGTTTTCTCGGTGGGCAGATATTGTGACTTTTGATCTCACCACAGCATATGAC  
CGCTTTGCAATCACAGCTCAGAAAAGGAAAGTAATGGTTTCCAGCAACCCAAGTATTATGA  
ACCATCACTCAAGAGATTCTGCATCAGCCAAGTGTTGTGTTCCCAGGGCTTCTCTACTGGG  
TGCCACTACTGGGAAGTAATTACCAAGGACAGTGATGGATGGGCTGTTGGAGTTGCTCGT  
GAAACAATTGGTAGAAGGGACAGATTAGGAAGAACAGAGCATTCTGGTGTGTAGAATGG  
GTAGGTCCCCAAAAGCAGTTGTCAGCATGGCACAAGAATCAAGAAACACTATTACGCAGTG  
ATAAACCATTGAAGGTTGGAGTTTTCTGGAGCTACAGAAGACTGTATCATTTTTATGCCATC  
ACTGACAAAGAAGTGCTTTTGCATACGTTTGAATCAATACCTCCAATCCTCTTTATCCTGC  
TTTCTGGCTATACAGTCTAGATAAAAATGGATCTTTAACTATAAATCACATAAACAGGAAGTA

```
>bubo_blakistoni-riplet
```

```
>buceros rhinoceros-riplet-partial
```

nnnnnnnnnnnnnnnnnnnnGCATCGAGCGGCTCCTgGGCGCCCTGGAGCTGCACTGCTCCTGCTGC  
CTGCACTACTTCACGGACCCGATGCGGCTCCGGGGCTGCSGCCACAGCTTCTGCCGCGC  
CTGCATCGCCCAGTACTGCAGGGGCGCGCAGCGCGCCGACTGCCCGCTCTGCCGGCAG  
GGGTTTCGMGCGGGGGCGACCTGCAGTTCAACCGGGAGCTGGCCGCCTTGGTGAGCTTAAT  
CCCGCAGTGGGTAAAGGAAGAAGAGTTGGAACTCAGGATGAACCGAGACCCTCCGGAG  
CTGCTGCCTGCAACGACCAGAACTCGGCTGGGCGGCGACCCCGGGAGAAGGAAGTGATA  
TGGGACATCTCTAAGCAACCAGAAGTGA CTGCAGAGACCATCCGCCTCTTGAGAAAGGATT  
TCAATAAAGCACTnGAATATGCATCTGAGATCAAAGCCAGATTACCGAAGATTTCCGTTGC  
ATGAAGGAATATGTTGAAAGGCAGGAGAGAAACACTCTGATCTTCATTGAACAAGAGCAAA  
AAGCAGCTCAACAGAAAATTGAAGAGAGTGTTTCGCCAGCTCAGTGTTGAAGGGAGCAATCT  
TACAGACATCAAAGAGCAAACGAATAATTTACCTGACAGACAGAGGTACAAAGGCTCACCT  
TCAACAGAGAATAAAACTACACTTGATGAGAAGCTTAGTGTTGTCAAAGTGTTGTAGAAGA  
TCTTAAGAGAGAGTTGGAAATTTTGCTATTGGAGAAATACGCTCAGCAGTTCCACCAAGTG  
CAACCCCCAGACTTACACCAGGAGACAAATGTCTGCTCATTATCTCCAGAGTCTGCAGCAA  
AAAATCCAGAGCCGGTGGTTTTCAAGCTCGTTTTGGCAGTGGGCAGATGATGTGACTTTTGA  
CCTCGCAAGAGTATATGAGCGCTTAGCAATCACAGCCCAGAACAGGAAAGTAATAGTTTTCC  
AGCTGCCCCGACTAATTATGCACCGTCAACCAACAGATTCTGCATCAGCCAAGTGATGTGTT

CACAGAGCTTCTCTACTGGGTGCCACTACTGGGAAGTAATTACCAAGGACAGTGATGGATG  
GGCTGTTGGAGTTGCTCATGAAAAGATTGGTAAAAGGGACAAATTAGGAAGAACAGAGCAT  
TCCTGGTGCGTAGAAATGGCTTGGTCCCAAAAAGCAGCTGTCAGCATGGCATAGGAATCAA  
GAAACATTATTACACAAGGATAAACCATTGAAGGTTGGAGTTTTCTGGAGCTACAAAAGAA  
GACCGTGTCATTTTACTCCATCAATGACAAAGAAATACTTCTGCACGCTTTTGAAGTCAATA  
CCACAAATCCTCTTTACCCTGCTTTCTGGCTGTATAGTCTACAAAGAGATGGATCTTTAACG  
CTCAGTCACGCAGACAGGTGATAA

>bucorvus\_abyssinicus-riplet

ATGGCTGCGGCTGTCGGCATCGAGCGGCTCCTGCGCGCCCTGGACCTGAGCTGCTCTTG  
CTGCCTGCAGTACTTCGCGGACCCGGTGCGGCTCCGGGGCTGCGGCCACAGCTTCTGCC  
GGGCCTGCATCGCCAGTACTGCAGGGGCCGGCAGCGCGCCGGCTGCCCGCTCTGCCG  
GGAGGGCTTCGAGCTGCGGGACCTGCGGCCCAACTGGGAGCTGGCCGCCTTGGTGAGCT  
TAATCCCGCAGTGGGTAAAGGAAGAAGAGTTGGAACTCAGGATGAACCGAGACCCTCCG  
GAGCTGCTGCCTGCAACGACCGGAACCTCGGCTGGGCGGCGACCCGGGGAGAAGGAAGA  
GATATGGGACATCTCCAAGCAACCAAAAGTGACTGCAGAGACCATCCACCTCTTGAGAAAG  
GATTTCAATAAAGCAAAGGAATATGCATCTCAGATCAAAAGCCAGATTACTAAAGATTTCTG  
TTGCATGAAGGAATACGTTGAAAGGCAGGAGAGAAACACTCTGATGTTTCATTGAACAAGAG  
CAAAAAGCAGCTCAACAGAAAATTGAAGAGACTGTTACACAGCTCGGTGTTGAAGGGAGTA  
ACCTTACAGACATCAAAGGGAGAACGAATAACTTATCTGACAGACAGAGGTACAAAGGCTC  
ACCTTCAACAGTGAATAAAATTACACTTGGTGAGAAGCTTAATGTTGTCAAAGCGCTGTAG  
AAGATCTTAAGAGAGAGTTGGAAATTTTACTATTGGAGAAATATGCTCAGCAGTTCCCACCA  
GTGCAACCTCCAGACTTACACCAGGAGACGAGTGTCTGCTCATTATCTCCAGAGTCTGCAG  
CAAAAATCCAGAGCCAGTAGTTTCAAGCCCATTTTGGCAGTGGGCAGATGATGTGACTTT  
TGACCTCGCAAGAGTATATGAGCGCTTAACAATCACAGCCCAGAACAGGAAAGTAAAGGTT  
TCCAGCTACCCGACTAATTATGGACCGTCACCCAACAGATTCTGCATCAGCCAAGTGATGT  
GTTACAGAGCTTCTCTACTGGATGCCACTACTGGGAAGTAATTACCAAGGACAGTGATGG  
ATGGGCTGTTGGAGTTGCTCATGAAATGATTGGTAAAAGGGACAAATTAGGAAGAACAGAG  
CATTCTGGTGCGTAGAATGGCTCGGTCCCAAAAAGCAGCTGTCAGCATGGCATAGGGAT  
CAAGAAACATTATTACAGAAGGATAAACCATTGAAGGTTGGAGTTTTCTAGAGCTACAAAA  
GAAGACTGTGTCAATTTTACTCCATCAATGACAAAGAAATACTTTTGCACACTTTTGAAGTCA  
ATACCACAAATCCTCTTTACCCTGCTTTCTGGCTGTATAGCCTAGAAAGAGATGGATCTTTA  
ACACTCAGTCACGCAGACAGGTGATAA

>butastur\_indicus-riplet

ATGGCTGCCGCTGTGGACCTGGAGCGGCTCCTGGGAGCCGTGGACCTGAGCTGCGCTTG  
CTGCCTGCAGTACTTCACGGAGCCCGTGCGGCTCACGGGCTGCAGCCACAGCTTCTGCC  
GGCCCTGCATCGTCGAGTACTGCAAGGGGAGGCAGCGCGCCGGCTGCCCGCTCTGCCG  
GGAAGGCTTCGAGCTGAAGGACCTGCGGCCCAACCGGGAGCTGGCCGCTTTGGTGAGCT  
TGATCCTGCAGGAGGCGAAGGAAGAAGGGCTGGAAACACGGGGTGAACCGAAACCCTCC  
GGAGCTGTTGCCTGCAACGACTGGAGCTCGGCGGGGCGACCTGGGAAGCAGGAAGACGA  
GATATGGGACATCTCCAAGCAACTAGACATGACTATAGAGACCATCCATCTCTTGAGGGAA  
GATATCAGTAAAAACaaAGGAATATACATCTCAGATCAAAAGCCAGATTACTAAAGATTTCTGT  
TGCATGAAGGAATATGTTGAAAGACAGGAGAGAAACACACTGACATTTATTGAAGAAGAGC  
AAAAAGCAGCTCAACAGAAAATTGAAGAGACTATTCACCAGCTCTGTGTTGAAGTGGACAA  
GCTCACAGACATCCAAGCCCAAACAGGTGACTTACCTGAGAGACATAGTTACAAAGGCTTA

CCTTCAACAAGGAATCAAATTACACTTCATGAGAAGCTTAATGTTGTCAAAAGTGCTGTAGA  
AGATCTTAAGAGAAAGATGGAAATTTTAATTTTGGAGAAATATTCTTGGAAGTTCCCACCAG  
TGCAACCTCCAGACTTGTCATCAGGAGACAAGTGTCTGCTCATTATCTCCAGAGTCTGCAGC  
TAAAAATCCAGAACCAATGATTTCAAGCCAGTTTTCTCAGTGGGCAGATGATGTGACTTTTTG  
ATCTCACAAGAGTATATAAGCGCTTAGCAATCACAGCCCAGAACAGGAAAGTAATGGTTTC  
CAGCTACCCAACTGATTATGAACCATTGCCCAACAGATTCTGCATCAGCCAAGTGATGTGT  
TCGCAGAGCTTCTCTACTGGGTGCCACTACTGGGAAGTAATTACCAAGGACAGTGATGGAT  
GGGCTGTTGGAGTTGCTCATGGAACAATTGGTAAAAGGGACAAATTAGGAAGAACAGAGC  
ATTCCTGGTGTGTAGAATGGCTAGGTTCCAAAAAGCAGCTGTCAGCATGGCATAAAGATCA  
AGAGACATTGTTACACGAGGATAAACCATTGAAGGTTGGAGTTCTTCTGGAGCTACAAAAG  
AAGACTGTGTCATTTTACTCTATCACTGACAAAGCAATGCTTTTGCATGCTTTTGAAATCAAT  
ACCTCAAATCCTCTTTACCCTGCTTTCTGGCTATATAGTCTAGAAAGAAATGGATCTTTAACT  
ATAAATCATACAAACAGGAGATAA

>cairina\_moschata-riplet

ATGGCTGTCCCGGAGGAGCTGGGTGCGCTGCTGGCAGACGTGGAGCTGAGCTGCTCCTG  
CTGCCTGCAGTACTTCACCGAGCCCGTGCGGCTGGCGAGCTGCAGCCACAGCTTCTGCC  
GGTCTGCATCGACACCTACTGCAGGGGGGAGGCGGCGCGCCCCCTGCCCGCTCTGCCG  
GGAGGAATTCGAGCCGAAGGACCTGCGGCCCAACCGGGAGCTGGCCGCCCTGCTCAGCC  
TGGTGCTGAGCGGGGGAAGGGGCGAGGGGCTGGGGGCGTGGGACGAGCCCACAGCCT  
GTGGAGATGGTGCCGCGGTGGATGCAGCTCTGCGGGGCGGCGACCCGGGGAGAAGGA  
GGAACAGATACATGACATCTCCAAGCAACTGGAATAACTGAAAAGACCATCAACGTCTTG  
AGGAAGGATCTCAGTAAAACAAAGGAATATACATCTCAGATCCAAAGCCAGATTACTAAAG  
ACTTCTGTTGCATGAAGGAATACATTGAAAGACAGGAGAAAAACACACTAATGTTTCATTGAT  
CAGGAGCAAAGCGCAGCTCAACAGAAGATTGCACAGACTATTCACCAGCTCTGTGTTGAAA  
AGAACAACTCATAGACATCAAAGCCCAGATGGAGAAAGGATTAGGAAGTGATGAAATGGA  
GTGGCAGAATAGTAACTTACTTGAGAGAGGGGAAGGCTCACCTTCAACAATGCATAAATTT  
ACAATTGATGAAAAGTTTAATGTTGTCAGAAGTGCTGTAGGAGATCTTAAGAGAAAGTTGGA  
AATTCTACTTTTGGAGGAATACCCTCAGCAGCTCCCACCAGCACAACTCTCCAGACTTACAC  
CAAGAGACAAGTGTCTGTTTCATCATCTTCAGAGTCCGCAGCTAGAAGTCCAGAACCAAGCA  
TTTCGAGACAGTTTTCTTGGTGGGCAGATAATGTGACTTTTGATCTCACCACAGCATATGAC  
CGCTTAGCAATCACAGCTCAGAACAGGAAAGTAATGGTGTCCAGCAACCCAACTTATTATG  
AACCATCACTCAGGAGATTCTGCATCAGCCAAGTTTTGTGTTCCCAGGGCTTCTCTACTGG  
CTGCCACTACTGGGAAGTAATTACCAAGGACAGCGATGGATGGGCTGTTGGAGTTGCTCA  
TGGAACCATTGGTAGAAGGGACAGATTAGGAAGAACAGAGCATTCTGGTGTGTAGAATG  
GGTAGGTCCCCAAAAGCAGTTGTCAGCATGGCACAAGAATCAAGAAACACTATTACGCAAT  
GATAAACCATCGAAGGTTGGAGTTTTCTGGAGCTACAGAAGACCGTGTCATTTTATGCCA  
TCACTGACAGAGAAATGCTTTTGCATACATTTGAAATCAATACCTCAAATCCTCTTTATCCTG  
CTTTCTGGCTATACAGTCTAGATAAAAATGGATCTTTAACTATAAATCACATAAACAGGAAGT  
AA

>calidris\_pugnax-riplet

ATGGCCGCCGCTGTCAGCGTGGAGCGGCTGCTGGAGGCCGTGGAGCTGAGGTGCGCTTT  
CTGCCTGCAGTTCCTCAGCGAGCCGGTGCTGCTGGCGGGCTGCGCCCACAGCTTCTGCC  
GGGGCTGCCTCCTCCCGCTCTGCCGGGGGAAGCTGCGCGCCTCATGCCCGCTCTGCCGG  
GAGGGCTTCCAGGAGAAGGACCTGCGGCCCAACCGGGAGCTGGCCGCTTTGGTGAGCTT

GGTCTCGGAGGTGGTAAAGGAGGAAGAGCTGGAAACGCGGGATGAAACGAAACCCCTGCG  
AAGCCCTTCCCTGCAGCGACCTGAGCTCGGTGGGGCGGCAACCACAGGAGAAGGAACAG  
ATGTGGGACATCTCCAAGGAAGAGACCATCCACCTCTTGAGGAAAGGTCTGAGTACAGCA  
GAGGAATACGAATCTCAGATCAGAAGGCAGATTACTGAAGATTTTTGTGCGCATGAAGGAAT  
ATGTTGACAGACAGGAGAGAAACACACTGATGTTAATTGAACAAGAGCAAAAAGCAGCTCA  
AGAGAAAACCTGAAGGGACTATTCACCAGCTCTGTGGTGAAGCGAACAAGCTCACAGACGT  
CAAAGCCCAAATGAATAACTCACCTGAGAGAGAGAGGTACAAAGGTGCACCTTCAAAAAAG  
CCTAAAATGACACTTGATGAGAAGCTTAATGTTGTCAAACTGCTGTAGAAGATCTTAAGAG  
AAAGTTGGAAATTTTACTTTTGGACTACGCTCAGCAGTTCCCGCCAGTGCAACCTCCAGAC  
TTGTATCAGGAGACAAGTGTCTGCTCATTATCTCCAGTGTCTGCAGCTAGAAATCCAGAAC  
CGATGATTTCAAGCCAAATTTCTCAGTGGGCAGCTGACGTGGCTTTTGATGTTGCAAGAAT  
AAATAAGCACTTAGTGATCACAGCCCAGAACAGGACAGTAATGGTTTCCAGTTCCCGGATC  
GATTACAAACCATCGCCCAACAGATTCTGCATCAGCCAAGTGATGTGTTCCAGAGCTTCT  
CTGCTGGGTGCCACTACTGGGAAGTAATTACCAAGGAGAGTGATGGATGGGCTGTTGGAG  
TTGCCCATGAAATGATTGGGAAAAGGGATAAATTAGGAAGAACAGAGCATTCTGGTGTGT  
AGAGTGGCTAGGTCCCAAAAAGCAGCTGTCAGCATGGCATAGAAATCAAGAAACATTATTA  
CACAAGGATAAACCATTGAAGGTTGGAGTTTTTCTGGAGCTACAAAGGAAAACCTGTGTCCT  
TTTACTCCATCACTGACAAAGAAATGCTTTTGCATACCTTTGAAATCACGACTTCAAATCCC  
CTTTACCCTGCTTGCTGGCTATATGGTCTGGAAAGAAATGGATCTTTAACTCTAAGTCACAC  
AAACAGGAGGTAA

>calonectris\_borealis-riplet

ATGGCGGGCCGCTGTGGACCTCGAGCGGCTCCTGGACGCCGTGGACCTGAGCTGCGCTTG  
CTGCCTGCAGTACTTCACGGACCCCGTGCGGCTCGCGGGCTGCACCCACACCTTCTGCC  
GGCCCTGCATCAACCGGTACTGCGAGGGGAAGCAGCGCACCCGCTGCCCGCTCTGCTGG  
GCGGACTTCAAGCTGAAGGACGTGCGGCCCAACCGGGAGCTGGCCGCTTTGGTGAGCTT  
AATCCCGCAGGAGGTAAAGGAAGAAGACTTGGAACACAGGGTGAAGTGAACCCCTCCGG  
AGCTGTTGCCAGCAGCGACCGGAGCTCGGAGGGGCGGCGACCTGGGGAGAAGGAGGAA  
GAGATATGGGACATCTCCAAGCAACTAGAAATGACTGCAGAGACCATCCACCTCTTGAGGA  
AAGATCTCAGTAAAGCAAAGGAATATGCATCTCAGATCAAAAGCCAGATTACTAAAGATTTT  
TGTTGCATGAAGGAATATATTGAAAGACAGGAGAGAAACACACTGATGTTTCATTGAACAAG  
AGCAAAAAGCAGCTCAACAGAAAATTGAAGAGACTATTCACCAGCTCTGTGTTGAAGTGAA  
TGAGCTCATAGACATCAAAGCCCAAACAAGTAACTTACCTGAGAGACATAGGTACAAAGGC  
TCAGCTTCAACAATGAATAAAATTACACTTGATGAGAAGCTTAATGTTGTCAAAAGTGCTGT  
AGAAGTTCTTAAGAGAAAGTTGGAAATTTTACTTTTGGAGAAGTACACTCAGCAGTTTCCAC  
CAGTGCAACCTCCAGACTTATACCAGGAGACAAATGTCTGTTCACTATCTCCAGAGTCCGC  
AGCTAAAAATCCAGAACCAATGATTTCAAGCCAGTTTTCTCAGTGGGCAGATGATGTGACTT  
TTGATCTCGCAAGAGTATATGACCGCTTAGCAATCACAGCCCAGAACAGGAAAGTAATGGT  
TTCCAGCTACCCGACTGATTATGAACCATCGCCCAACAGATTCTGCATCAGTCAAGTGATG  
TGTTTGCAGAGCTTCTCTACTGGGTGCCACTACTGGGAAGTAATTACCAAGGACAGTGATG  
GATGGGCTGTTGGAGTTGCTCATGAAATGATCGGTAAGGAGGACAAATTAGGGAGAACAG  
AGCATTCTGGTGTGTAGAAATGGCTAGGTCCCAAAAAGCAGCTGTCAGCATGGCATAGGG  
ATCAAGAAACATTATTACACAAGGATAAACCATTGAAGGTTGGAGTTTTCTGGAGCTACAA  
AAGAAGGCGGTGTCATTTTACTCCATCACTGACAAAGAAACGCTTTTGCATACATTTGAAAT  
CAATACCTCAAATCCTCTTTACCCTGCTTTCTGGCTATACAGTCTAGAAAGAAATGGATCTT

TAACTATAAATCACACAAACAGGAGATAA

>calypte\_anna-riplet

ATGGCTGCTGCTATCGACCTCGAGAGGCTCCTGAACGTCGTGGACCTGACCTGCACTTGC  
TGCCTGCAGTATTTACCGACCCGGTGCGGCTCACGGGCTGCACTCACAGCTTCTGCCGG  
ACCTGCGTCGTCTGGGTACTGCAAGGGGAGGCAGCGCGCCGACTGCCCCGCTCTGCCGGG  
AAACTTTTCGAGCTGAAAGACCTGCGGCCCAACCGGGAGCTGGCAGCTCTGGTGAGCTTAA  
TCCCCGAGGAGATAAAGGAAGAAGAGTTGGAACCCAGGATGAACCGAAACCCTCCGCAG  
CTGCTGCTTGCAGCGACTGCATCGCGGCGGGACAGCGATCTGGGGAGAAGGAGGAAGAG  
ATATGGGACATCTCCAAGCAAATAGAAATGACAGCAGAGACCATCCAGCTCTTGAATAAAG  
ATCTCAGTAAAGCAAAGGAGTACACATCTCAGATCAAAAGCCAGATTACTGAAGATTTCTGT  
TGCATGAAAGAGTATGTTGAAAGACAGGAAAAAACACACTGACATTCATTGAACAAGAGC  
AAAAAGCAGCTCAACAGAAGACTGAAGAGGCTATTACCAGCTCTGTGTTGAAGTGAATGA  
ACTCATAGACCTCGAAGCCCAAATGAGTAACTTACCTGAGAATCATAGGTACAAAGGCTCA  
CTTTCCACAGTGAATAGAATTACACTTGCTGAGAAGCTCAATGTTGTCAAAGAGCTGTAA  
AGATCTTAAGAGAAAGTTGGAATTTTTACTTTTGGAGAAATACTCTCAGCAGTTCCAACCAG  
TGCAACCTCCAGACTTACATCAGGAGGCAAATACCTGTTTGGTATCTCCTGAGTCTGCAGC  
TAAAAATCCAGAACCAACAATTTCAAGACAGTTTTCCAGTGGGCAGAAAAATGTGACTTTTG  
ATTTCCAGAAGAGTATATAAACGCTTAGCAATCACAGCCCAGAGCAGGAAGGTAATGGTTTC  
CAGCTACCCAACTGATTATGAACCATCACCCAACAGATTCTGCATCAGCCAAGTGATGTGT  
TCCCAGAGCTTCTCTGCTGGGTGCCACTACTGGGAAGTAATTACAGAGGACAGTGATGGA  
TGGGCTGTTGGAGTTGCTCATGGAATGATTGGTAAAAGGGACAAACTAGGAAGAACAGAG  
CATTCCTGGTGTGTAGAATGGCTAGGTGCTAAAAAGCAGCTGTCAGCATGGCATAGAGATC  
AAGAAACATTATTACACTTTGATAAACCCTGAGGGTTGGAGTTTTCTGGACCTGCAGAA  
GAAGACTGTGTCAATTCTACTCCATCACTGATGAGGAAATACTTCTGCACGCTTTTGAAATCA  
ATACTTCAAGTCCTCTTTATCCTGCTTTCTGGCTGTATAGCCTAGAAAGAAATGGATCTTTA  
ACAATAAGTCACACAAACAGGAGATAA

>casuarius\_casuarius-riplet

ATGGCGGCCTCTCTGGACCTCCGGCAGCTCCAGGCCACCTGGACCTGAGGTGCCCCGTG  
CTGCCTGCTGTACTTCACCGACCCCGCGCGGCTCGCGGCCTGCGGCCACAGCTTCTGCC  
GCTCCTGCATCACCGCCTACTGCAAGGCGAAGCGGAGCGCCAGCTGCCCCGCTCTGCCGC  
GAGGCCTTTGAGCTGAAGGACTTACGGCCCAACCGGGAGCTGGCCGTTCTGGTGAACCT  
GATCCCCAGGGAGGAAAAGGAGAAAGATTGGGAGAGAGGGGATGAACTGGGACTGCACG  
GTGCCAGCGCCAGGGGCAGCCCGAGCTCAGCGGGGCGGAGAGATGCGGAGAAGGAGAA  
AGAGATAAGTGAGATCTCCAAGCAACTGGAAATGACTGAAGAGACCATCCGCCTCTTGAG  
GAAGGATCTGAGTAAAACAAAGGAATATACATCTCAGATCAAAAGCCAGATTACTAAAGATT  
TCTGTTGCATGAAGGAATACATTGAAAGACAGGAGAGAGAAACACACTGATGTTTATTGAACA  
ACAGCAACAAGCAACTCAACAGAAATTTGAAGAGACTATTGACCAGCTCTGTGCTGAAGTG  
AACAAGCTCACAAGCATCAAAGCCCAGCTGGAGGAAGGACTGGTAAGTGATGAAATGAAG  
TGGCTGAATGGTTACTTACCTGAGAGAGATGGGTACAAAGGCTCACCTTTACTAATGGATA  
AAATTACACTTGATGAGGAGAAGATTAATTTTGTACAAATGCTGTAGAAAGATCTTAAGAAA  
CAATTGGAAATGTTACTTTTGGAGAAATACCCTGGGCGGTTCCCCGCAGAACAACTTCCAG  
ACTTGATCAGGAAACAAGGGTCTGCTCATTATCTTCAGAGTCTGCAGCTAAAAATCCAGA  
ACCAGGGATTTCAAGCCAGTTTTCTCAGTGGGCAGAGGATGTGACCTTTGATCTCACAAGA  
ATATATCAGCGCTTAGTAATCACAGATCAGAACAGGAAAGTAATGGTTTCCAGCTATCCCTG

>cathartes\_aura-riplet-partial

>catharus ustulatus-riplet

ATGGCCGCCGTCATCGATCTGGAGCGGCTGCAGCGCGTCCTGGAGCTGCAGTGCTCCTG  
CTGCCTGCAGCTCTTCGAGGAGCCCGTGCGGCTCACGGACTGCGGCCACAGCTTCTGCC  
GGGACTGCATCCTCCGCCACTGCTCGGGGCGGCCCGCGCCCTCTGCCCGCTCTGCCGC  
CGCCCCCTTCGAGTCCCAGCACCTGCGGCCCAACCGCGAGCTGGCCGCGCTGCTCAGCCT  
CATCCCGCGGGAGCTGCTGGAACACTTGAAACACAGGACGAGCCGGAACCCTGCGGAG  
CTGCTGCTTGCAGCGACCTGAGCTCGGCGGGGCGGGGACCTGGGGAGAAGGAGGAAGA  
GATATGGGAGAGCTCCAAGGAACAAGAAATAACTGCAGAGACCATCCACCTGTTGAGAAAA  
GATCTCAATAAAACAAAGGAATATACATCTCAGTTCAAAGGCCAGATTACCAAATACTTCTG  
TTGCATGAAGGAATATGTTGAAAGACAGGAGAGAAACACACTGATGTTTCATTGAACAAGAG  
CAAAAAGCTGCTCAACAGAAAATTGAAGAGACTATTCACCAGCTCACAGACATCAAAGCCC



AAACCAGTGACTTATCTGAGAGGCAGAAGTATGAAGGCTCACCTTCAACAATTAATAAAATT  
ACACTTGATGAGAAGCTTAATGTTGTCAAAAGTGCTGTGGAAGATCTGAAGAGAAAGCTGG  
AAATTTTACTCTTGGAGAATTATGCTCAGCAACTCCCACCAGTGCAGCCTCCAGACTCATAT  
CAGGAGCCAAAGTGTCTGCTCATCATCTCCAGAGTCTGCAGCTGCAAGACCTGAACCAAGC  
TTTTCCAGCCAGTTCTCTCAGTGGGCAGAGGATGTGACTTTTGACCCCAACAAGAGTACACG  
AGCGCTTGGCACTCACAGCCCAGAACAGGAGAGTGGTGGTTTCCAGCCACCCAACCACTT  
ATCAACCATCACCCAAAAGATTCTGCATCAGCCAAGTGATGTGTTTACAGGGGCTTCTGTGC  
TGGGAGCCACTACTGGGAAGTAATTACCAAGGACAGTGATGGATGGGCTGTTGGAGTTGC  
TCATGAAATGATTGGTAAAAGGGAGAAATTGGGAAGAACTGAGAATTCCTGGTGTGTAGAA  
TGGCTGGGTCCTAAAAACAGCTATCAGCATGGCACAAGGATCAAGAAACATTATTACACA  
AGGACAAACCACTGAAGGTTGGAGTTTTCTGGAGCTACAAAAGAAGACCGTGTCAATTTTA  
CTCCATCACTGACAAAGAAATGCTTTTGCACACCTTTGAAATCAGTACCTCAAATCCTCTCT  
ACCCTGCTTTCTGGCTGTACACTCTAGAAAGAAATGGATCTTTAACTATAAGTCAGCCAAAC  
AGGAGATAA

>charadrius\_alexandrinus-riplet

ATGGCTGCTGCTGTGCGCCCTGGAGCGGCTCCTGAGCGCCGTGGAGCTGAGCTGCACTTG  
CTGCCTGCAGTACTTTAGGGACCCGGTGCGGCTCACCGGCTGCACCCACAGCTTCTGCCG  
GCCCTGCATCGTCCGGTACTGCGAGGGGAGGCAGCGCGCCGGCTGCCCGCTCTGCCGG  
GAAGGCTTCGAGCTGAAGGACCTGCGGCCCAACCGGGAGCTGGCCGCTTTGGTGAGCTT  
AATCCTGCAGGAGGTGAAGGAGGAAGAGTTGGAACAGAGGATGAACCGAAACCCTCCG  
GAGCTGTTCCCTGCAGCGACGGGAGCTCGGCGGGGCGGCGACTTGGGGAGAAGGAGGA  
AGAGATATGGGACATCTCCAAGCAACTACAAATGACTACAGAGACCATCGACCTCTTGAGG  
AAAGATCTGAGTAAAGCAAAGGACTATGCATCTCAGATCAAAAGCCAGATTACTGAAGATT  
CTGTTGCATGAAGGAATATGTTGAAAGACAGGAGAGAAACACACTGATGTTTCATTGAACAA  
GAAGAAAAGGCAGCTCAAGAGAAAATTGAAGAGAGTATTCACCAGCTCTGTGGTGAAGTGA  
ACAAGCTCACAGACATCAAAGCCCAAATGAGTAACTTACCTGAGAGACAGAGGTACAAAAG  
CTCACCTTCAACAATGACTAAAATTACACTTGATGAGAAGCTTAATGGTGTCAAAACTGCTG  
TGGAAGATCTTAAGAGAAAGTTGGAATTTTACTTTTGGAGAAGTACGCTCGACGGTTCCC  
ACCAGTGCAACCTCCAGACTTATATCGGGAGACAAGTGTCTGCTCATTATCTCCAGAGTCT  
GCAGCTAAAATTCCAGAACCAGTGATTTCAAGCCAGTTTTCTCAGTGGGCAGCTGATGTGA  
CTTTTGATGTCACAAGAGTATATGAGCGCTTAGCAATCACAGCCCAGAACAGGACAGTAAT  
GGTTTCCAGCTCCCCGACTGATTATGAACCATCACCCAACAGATTCTGCATCAGCCAAGTG  
ATGTGTTCCAGAGCTTCTCTGCTGGGTGCCACTACTGGGAAGTAATTACCAAGGACAGCA  
ATGGATGGGCTGTTGGAGTTGCTCATGAAATGATCGGTAAAAGGGACAAATTAGGAAGAAC  
GGAGCATTCTGGTGTGTAGAATGGCTAGGTCCCAAAAAGCAGCTGTCAGCATGGCATAG  
AGATGAAGAAACTTTATTACACAAGGAGAAACCATTGAAGGTTGGAGTTTTGCTGGAGCTA  
CAAAAGAAGATCGTGTCTTTTACTCCGTCAGTACAAAAGAAATGCTTTTGCATACATTTGA  
AATCAATACCTCAAATCCTCTTTACCCTGCTTTTCTGGCTATATAGTCTAGAAAGAAATGGAT  
CTTTAACTATAAGTCACACAAACAGGGGATAA

>chlamydotis\_macqueenii-riplet

ATGGCCGCCGCCGTGGAACCTCGAGCGGCTGCTGCGCGCCGTGGACCTGAGCTGCTCCTG  
CTGCCTGCAGTACTTCACGGAGCCCGTGCGGATCACGGGCTGCAGCCACAGCTTCTGCC  
GGGCCTGCATCAGCGAGTACTGCAAGGGGAAGCAGCGCGCCGGCTGCCCGCTCTGCCG  
GGAAGGCTTCGAGCTGAAGGACCTGCGGCCCAACCGGGAGCTGGCCGCTCTGGTCAGCT

TAATCTCGCAGGAGGTGCAGGAGGAAGAGTGGGAGACACGGGATGAACCCACACTCGCT  
GGAGCTGCAGCCTCCAGCCACTGGAACGCGGCGGCGTGGCGACCTGCGGAGAAGGAGG  
AAGAGATATGGGACATCTCCAAGCAACTAGAAGTGAAGTGTAGAGACCATCCACCTTTTGGG  
GAAAAATCTCAGTGAAACAAAGGAATATGCATCTCGGATCAAAAGCCAGATTATTGAAGATT  
TCTGTTGCATGAAGGAGTATGTTGAAAGACAGGGGCGTAACACACTGATGTTTCATTGAACA  
GGAGCAAAAAGCAGCTCAACAGAAAAATTGAAGAGACTATTCACCAGCTCTGTGTTGAAGCA  
AACAACTCATGGACATGAAAGCTGAAACGAGTTACTTACCTGAGAGACATAGGTACAAAG  
ACTTACTTTCAACAGTGAATAAAATTGCACTTGATCAGAAGCTTAATGTTGTCAAAAGTGCT  
GTAGAAGATCTTAAAGAAAGTTGGAAATTTTACTTTTGGAGAAATATGCTCAGAAGTTCCC  
AACAGTGCAACCTCCAGACCCACATCAGGAGACAAATGTCTGCTCATTATCTCCAGAGTCT  
GCAGCTAAAAATTCAAGAGCCAATTATTTCAAGCCAGTTTCTCAGTGGGCAGATGATGTGA  
CTTTTGATCTCAAAAGAGTATACGAGCGCTTAGCAATCACAGCCCAGAACAGGAAAGTAAT  
GGTTTCCAGCTACTCGACCAATTATGAACCAGCACCCAACAGATTCTGCATCAGCCAAGTA  
ATGTGTTCCCAGAGCTTCTCTACTGGGTGCCACTACTGGGAAGTAATTACCAAGGACAGCG  
ATGGATGGGCTGTTGGAGTTGCTCATGAAATGATTGGTAAAAGGGACAAATTAGGAAGAAC  
AGAGCATTCTGGTGTGTAGAAATGGCTAGGTCCAAAAAGCAGCTGTCAGCGTGGCACAG  
AGATCAAGAAACATTATTGCACAAGGATAAACCATTTGAGGGTTGGAGTTTCTGAGCTA  
GAAAAGAAGATGGTGTCATTTTACTCCATCAATGACAAAGAAATGCTTTTGCATACTTTTGA  
AATCAATACCTCAAATCCTCTTTACCCTGCTTTCTGGCTATATAGCCTAGAAAGAAATGGAT  
CTTTAACTATAAGTCACACAAACAGGAGGTAA

>chloebia\_gouldiae-riplet

ATGGCCGCCGTCAATCGAGCTCGAGAGGCTGCAGCGCGTCCTGGAGCTGCAGTGCTCCTT  
CTGCCTGCAGCTCTTCGCGGAGCCCGTGCGAATCACGGGCTGCGGCCACAGCTTCTGCC  
GGGGCTGCGTGCTGCGGTACTGCGCGGGGCGCCGCGCCGCTGCCCCGCTCTGCCGCTG  
CGCCTTCGAGCCGCGAGCACCTGCGGCCCAACCGCGAGCTGGCCGCGCTGCTCAGCCTCG  
TCCCGCGGGAGCTGAAGGAAGCCCTGGAAGCGCAGGAGGAGCCGGCAGCCGATGGAGC  
TGCTGCCCCGAACGACCTGAGCTCGGCGAGGCGGGGACGTGGGGAGAAGGAGGAAGAG  
ATATGGGAGAGCTCCAAGCAACAAGAAATAACTGCAGAGACCATCCACCTGTTGAGGAAA  
GATCTCAATAGAGCAAAGGAATATACATCTCAGATCAAAAGCCAGATTACTGAAGATTTCTG  
TTGCATGAAGGAATATGTTGAAAGACAGGAGAGAAACACACTGATGTTTCATTGAACAACAA  
CAAAAAGCTGCTCAACAGAAAATTGAAGAGACTATTCACCAGCTTACAGACATCAAAGCCC  
AAAGTAGAGACTTATGTGAGAGGCAGATGTACGAAGGCTCACCTTTGACAATAAATAAAATT  
ACACTTGATGAAAACTTAATGTTGTCAAAAGTGCTGTAGAAGATCTTAAGAGAAAGTTGGA  
AATTTTACTCTTGGAGAATTATGCTCAGCAACTCCCACCAGTGACGCTCAAGACTTCTACC  
AGGAGCCAAGTGTCAGCTCATCACCTCCAGAGCCTGCGGCTGAATGTCCTGAACCAACCA  
TTTCCAGGCACTTCTCTCAGTGGGCAGATGATGTGACTTTTGATCCCACAAGAGTACACAA  
GCACTTGGCACTCACAGCCCAGAACAGGAGAGTGATGGTTTCCAGCCATCCCACCAGTTA  
TCAACCATCCCCCAAAAGATTCTGCATCAGCCAAGTCATGTGTTACAGGGTTTCTCTACT  
GGGTGCCACTACTGGGAAGTGATTACCAAGGACAGTGATGGATGGGCTGTTGGAGTTGCT  
AATGAAATGATTGGTAAAAGGGACAAATTGGGAAGAACTGAGCATTCTGGTGTGTGGAAT  
GGCTGGGTCCTAAAAAACTGCTATCAGTGTGGCATAAGGGTCAAGAAACATTATTACACAA  
GGACAAACCACTGAAGGTTGGCGTTTTCTGGAGCTAGAGAAGAAGACTGTGTCATTTTAC  
TCTATCGCTGGCAAAGAAATCTTCTGCACACCTTTGAAATCAGTACCTCAAATCCTCTCTA  
CCCTGCTTTCTGGCTGTACACTCTAGAAAGGAATGGATCTTTAACTATAAGTCAGCCAAACA

GGAGATAA

>ciconia\_boyciana-riplet

ATGGCTGCGGCCGTGAGCTCGAGCGGCTGCTGGGCGCCGTGGACCTGAGCTGCACTTG  
CTGCCTGCAGTACTTCACGGACCCCGTGTGGCTCACGGGCTGCAGCCACAGCTTCTGCCG  
GCCCTGTATCATCCAGTACTGCAAGGGGAGGCAGCGCGCAAGCTGCCCGCTCTGCCGGG  
CGGACTTCGAGCTGAAGGACCTGCGGCCCAACCGGGAGCTGGCCGCTTTGGTGAACCTTA  
ATCCTGCAGGAGGTAAAGGAAGAAGAGTTGAAACACAGGGTGAACCGAAACCCTCCGAA  
ACTGTTGCCTGCAACGACCGGAGCTCGGCGGAGCGGCGACCTGGGGAGAAGGAGGAAG  
ATATATGGGACATCTCCAAGCAACTAGAAATTACTGCAGAGACCATCGACCTCTTGAGGAA  
AGATCTCAGTAAAGCAAAGGAATATGCGTCTCAGATCAAAAGCCAGATTACTGAAGATTTCT  
GTTGCATGAAAGAGTATGTTGAAAGACAGGAGAGAAACACACTGAGGTTTCATTGAACAAGA  
GCAAAAAGCAGCTCAACAGAAAACTGAAGAGACTATTCACCAGCTCTGTGTTGAAGTGAAC  
GAGCTTTTAGACATCAATGCCCAAACGAGTAACCTTACCTGAGAGACATAGGTACAAAGGCT  
CACCTTCAGCAATGAATAAAATTACGCTTGATGAGAACTTAACATTGTCAAAAGTGCTGTA  
GAAGATCTTAAGAGAAAGTTGGAAATTTTACTTTTGGAGAAATACGCTCAGCAGTTCCCACC  
CGTGCAACCTCCAGACTTACATCAGGAGACAAATGTCTGCTCATTATCTCCAGAGTCTGCA  
GCTGAAAATCCAGAACCGATGACTTCAAGCCAGTTTTCTCAGTGGGCAGATGATGTGACTT  
TTGATCTCACAAGAGTATATGAGCGCTTAGCAATCACAGCCCAGAAGACGAAAGTAATGGT  
TTCCAGCTACCTGACTGGTTATGAACCATCGCCCAACAGATTCTGCATCAGCCAAGTGATG  
TGCTCCCAGAGCTTCTCTACTGGGTGCCACTACTGGGAAGTAATTACCAAGGACAGTGATG  
GATGGGCTGTTGGAGTTGCTCATGAAATGATTGGTAAAAGGGACAAATTAGGAAGAACAGA  
GCATTCTGGTGTGTAGAATGGCTAGGTCCCAAAAAGCAGCTGTCAGCATGGCACAGGGA  
TCAAGAAACATTATTACACAAGGATAAACCATTGAAGGTTGGAGTTTTCTGGAGCTACAAA  
AGAAGACCGTGTCAATTTTACTCCATCACTGACAAAGAAATGCTTTTGCATACATTTGAAATC  
AATACGTCAAACCCTCTTTACCCTGCTTTCTGGCTCTATAGTCTAGAAAAAAATGGATCTTT  
AACTATAAGTCATACAAACAGGAGGTAA

>columbia\_livia-riplet

ATGGCTGCTGCCATCGATCTGGAGCGGCTGCTGGACGCCCTGGAGCTGAGCTGCGCCTG  
CTGCCTGCAGTACTTCACGGAGCCCGTGCGGCTCCCGGGGCTGCGGGCACAGCTTCTGCC  
GCGGCTGCATCGCCCTGCACTGCAGCGGCCGGCAGCGCGCCGCTGCCCGCTCTGCCG  
GGAGGGCTTCGAGCTCAAGAACCTGCGGCCCAACCGGGAGCTGGTGGCTTTGGTGAAC  
TAATCCCGCAGGAGGTCAAGGAAAAGGAGCTGGAACAYGGGGTGAACGGAAACCCTCC  
GGAGCTGTTGCCTGCAACGACCGGAGTTCACCTGGGGAGAAGGAGGAAGAGACGTGGGA  
CATCTCCAAGCAGCCAGAAGTGACTGCAGAGACCATCCATCTCTTGAGGAAAGATCTCCGT  
GAAGCAAAGGACTATGCATCTCTGATCAAAAGCCAGATCACTACATATTTCTGTTGCATGAA  
GGAATATGTTGAAAGACAGAAGAAAAACACACTGATGATCATTGAACAAGAGCAAAAAGCA  
GCTCAACAGAAAATTGAGGAGACTATTCGGCAGCTCTCTGTTGAAGTGAACAAGCCCACAG  
ACCTCAAAGCCCCAAACAAGTAGTTTACCTGAGAGACATAAGTACAAAGGCTCACCTTCAA  
GACTAAAATTACGCTTGATGAGAAGCTTAATGCTGTCAAAAGTGCTGTAGAAGATCTTAAGA  
GAAAGCTGGAATTTTTACTTTTGGAGAAGTATGCTCGGCAGTTCCCACCAGTGCAACTTGC  
AACTTCCATCAGGAGACAAGTGTCTGCTCATTATCTCCAGAGGCTGCAGCTGAAAATCCA  
GAACCAACGATTTCCAGCCAGTTTTCTCAGTGGGCAGATGATGTGACTTTTGATCTCACA  
GAGTATATGAGCGCTTAGCAATCACAGCCCAGAACAGGCGAGTAATGGTTTCCAGCCGCC  
CAGGTAATTATGAACCATCGCCCAACAGATTCTGCATCAGTCAAGTGATGTGTTGCGCAGAG

CTTCTCCACTGGGTGCCACTACTGGGAAGTCATTACCAAGGACAGTGATGGATGGGCTGT  
TGGAGTTGCCCATGAAATGATTGGTAGAAAGGACAAATTAGGAAGAACAGAGCATTCTG  
TGTGTAGAATGGCTAGGTCCCAAAAAGCAGCTGTCAGCATGGCATAGGAATCAAGAAACAT  
TATTACAGAAGGATAAACCATTGAAGGTTGGAGTTTTCTGGAGCTACAAAAGAAGACCAT  
GTCATTTTACTCCATCACTGACAAAGAAATGCTTTTGCATACTTTTGAAATCAATACCTCGAA  
TCCTCTTTACCCTGCTTTCTGGCTATATAGTCTAGAAAGAAATGGATCTTTAACTATATGTCA  
CACAAACAGGAGGTAA

>corapipo\_altera-riplet

ATGGCCGCTGCCATCGAGCTGGAGCGGCTCCTGGCCGCCGTGGAGCTGAGGTGCTCCTT  
GTGCCTGCAGTTCTTCTCGGAGCCGGTGCGGATCGCGGGCTGCAGCCACAGCTTCTGCC  
GGCGCTGCATCAGCCGGTACCGCGCGGGGCCGGCCCGGGCCGGCTGCCCGCTCTGCAG  
GGAGGGCTTCGAGCTCCGCGACCTGCGGCCCAACCGCGAGCTGGCCGCGCTGCTCAGC  
CTCATCCCGCCCCGAGCTGAGCGAGGAGAAGCTGGAACCCAGGATGAACCCTCTGGAGC  
TGTTGTCTTCGGCGACCGGAGCTCGGCGGGGCGGCGACCTGGGGAGAAGGAGGAAGAG  
ATATGGGAAAGCTCCAAGCAACCAGAAATATCTGCAGAGACCGTCCCCCTGTTGAGGAGA  
GATCTCAATAAAACCAAGGAATACACATCTGAGATCAAAAGCCAGATTACTCGAGATTTCTG  
TTGCATGAAGGAATATGTTGAAAGACAAGAGAGAAGCACATTGATGTTTCATTGAGCAAGAG  
CAAAAAGCTGCTCAACAGAAGATTGAAGAGACTATTCACCAGCTCACAGACAGCAAAGCCC  
AAACTAGTAACCTTACCTTATGAAGGCTCACTTTCAATAATGAATAAAATTACACTTGATGAGA  
AACTTAATGTTGTCAAATGGGCTGTAGAAGATCTTAAGAGAAAAGTTGGAAATGTTACTTTTG  
GAGAAATACCCTCAGCAATTCCCACCAGTGCAGCCTCCAGACTCGTATCAGGAGACAAGT  
GTCTGCTCATCACCCCCAGAGTCTGCAGCTGAAATTCCAGACCTGGTGATTCCAAGCCAGT  
TTTCTCAGTGGGCAGAGGATGTGACTTTTGACCACACGAGAGCAAACGAGCGCTTGGCCC  
TCACAGCCCAGAACAGCAGAGTGGTGGTTTCCAGCCACCCCACCTGGTATGAACCATCTC  
CCAAGAGATTCTGCATCAGCCAAGTGATGTGTTCCAGAGCTTCTCCACGGGGTGCCACT  
ACTGGGAGGTGATTACTGAGGACAGTGATGGATGGGCTGTTGGAGTCGCTCATGAAATGA  
TTGGGAAGAGGGACAAATTGGGAAGAACAGAGCATTCTGGTGCGTGGAATGGCTGGGTT  
CCAAAAGCAGCTGTCAGCCTGGCACAAGGATCAAGAAACATTGTTACACAAGGATAAACC  
GCTGAGGGTTGGGGTTTTCTGGAGCTACAAAAGCAGACAGTGTCTTCTACTCCATCACT  
GACAGGGAAATTCTCTTGACACCTTTGAACTCAGCACCTCCCATCCTCTCTATCCTGCCTT  
CTGGCTGTACAGCCTGGAAAGAAATGGATCTTTAACTCTAAGCCACCCAAACAGGAGATAA

>corvus\_moneduloides-riplet

ATGGCCGCCGTGCATCGAGTTTCGAGCGGCTCCAGCGCGTCCTGGAGCTGCAGTGCTCCTG  
CTGCCTGCAGTTCTTCGCGGAGCCGGTGCGGCTCACGGGCTGCGGCCACAGCTTCTGCC  
GGGGTTGCATCCTCCGGTACTGCGCGGGGCGGCCCGCGCCGCTGCCCGCTCTGCCG  
GCGCAGATTTCGAGCTCCGCCACCTGCGGCCCAACCGCGAACTGGCCGCGCTGCTCAGCC  
TCATCCCGCGGGAGACGAAGGAAAAGTTGGAAACACAGGATGGGGCGGAACCCTATGGA  
GCTGCTGCCTGCAACGACCAGAGCTCGGTGGGGCGGGGACCTGGGGACAAGGAAGAAG  
AGATATGGGAGAGCTCCAAGCAAGAAGAAATAACGGCAGAGACCGTCCACCTTTTGAGGA  
AAGATCTCAATAAAACAAAGGAATATACATCTCAGATCAAAAGCCAGATTACTAAAGATTTC  
TGTTGCATGAAGGAATATGTTGAAAGACAGGAGAGAAACACACTGATGTTTCATTGAACAGG  
AGCAAAAAGCTGCTCAGCATAAAATTGAAGAGACTATTCACCAGCTCACAGACATCAAAGG  
CCAAACTAGTAAGTTACCTGAGAGGCAGAGGTACAAAGGCTCACCTTCAACAATTAATAAA  
ATTACACTTGATGAGAAGCTTAATGTTGTCAGAAGTGCTGTAGAAGATCTTAAGAGAAAAGTT

GGAAATTTTACTCTTTGAGAATTATGCTCAGCAGCTCCCATCAGTGCAGCCTCCAGACTCAT  
ATCAGGAGCCAAGTGTCTGCTCATCATCTCCAGAGTCTGCAACTGAAAGTCCTGAACCAAC  
CATTTCCAGGCAGTTTTCTCAGTGGGCAGATGATGTGACTTTTGACCCCAAGAGTACAC  
AAGCACTTGGCACTCACAGCCCAGAACAGGAGAGTGATGGTTTCCAGCCACCTGACCAGT  
TATGAACATTACCCAAAAGATTCTGCATCAGCCAAGTGATGTGTTACAGGGCTTCTCTAC  
TGGGTGCCACTACTGGGAAGTAATTACCAAGGACAGTGATGGATGGGCTGTTGGAGTTGC  
TCACGAAATGATTGGTAAAAGGGACAACTGGGAAGAACTGAGCATTCTGTTGTGTAGAA  
TGGCTGGGTGCTAAAAACAGCTGTCAGCATGGCATAAGGATCAAGAAACATTATTACACA  
AGGATAAACCGCTGAAGGTTGGAGTTTTCTGGAGCTACGAAAGAAGACCGTGTCATTTTA  
CTCAATCGCTGACAAAGAAATGCTTTTGCACACCTTTGAAATTATTACCTCAAATCCTCTCTA  
CCCTGCTTTCTGGCTGTACAGTCTAGAAGGAAATGGATCTTTAACTATAAGTCAGCCAAACA  
GGAGATAA

>cyanistes\_caeruleus-riplet

ATGGCCGCCGTCATCGAGCTCGAGCGGCTGCAGCGCGTCCTGGAGCTGCATTGCTCGTG  
CTGCCTGCAGCTCTTCGCGGAGCCGGTGC GGCTCACGGGCTGCGGCCACAGCTTCTGCC  
GGGGCTGCATCCTCCGCTACTGCGCGGGGCGGCCCCGCGCCGCTGCCCGCTCTGCCG  
CCGCGCCTTCGAGCTCCGGCACCTGCGGCCCAACCGCGAGCTGGCCGCGCTGCTCAGCC  
TCATCCCGCGGGAGCTGAAGGAAGAACTGGAAACACAGGAGAACCCGGATCCCTATGGA  
GCTGCTGCCTGCAACGACCGGAGCTCGGCAGGGCGGAGACCTGGGGAGAAGGAGGAAG  
AGATATGGGAGAGCTCCAAGCAACAAGAAATAACTGCAGAGACCATCCACCTATTGAGGAA  
AGATCTCAGTAAAACAAAGGAATATACATCTCAGATCAAAAGCCAGATTATTAAGATTTCT  
GTTGCATGAAGGAATATGTTGAAAGACAGGAGAGAAACACACTGATGGTCATTGAACAAGA  
GCAAAAAGCTGCTCAACAGAAAATTGAAGAGACTATTCACCAGCTCAAAGACATCAAAGCC  
CTAACTAGTGACTTATCTGAGAGGCAGACATATGAAGGCTCACCTTCAACAATAAATAAAAT  
TACACTTGATGAGAACTTAATGTTGTCAAAAGTGCTGTAGAAGATCTTAAGAGAAAGTTGG  
AAGTTTTACTCTTGAGAATTATGCTCAGCAACTGCCAGCAGTGCAGCCTTCAGACCAGGA  
GCCAAGTGTCAGCTCATCATCTCCAGAGTCTGCAGCTAAAAGTCCTGAACCAACCATTTCC  
AGCCAGTTTTCTCAGTGGGCAGATGATGTGACTTTGGACCCCAAGAGTACACGAGCGC  
TTGGCACTCACAGCCCAGAACAGGAGAGTGATGGTGTCCAGCTACCTGATCACTTATCAAC  
CATCACCCAAGAGATTCTCCATCAGCCAAGTGATGTGTTACAGGGCTTCTCTACTGGGTG  
CCACTACTGGGAAGTAATTACCAAGGACAGTGATGGATGGGCTGTTGGAGTTGCTCATGAA  
ATGATTGGTAAAAGGGACAAATTGGGAAGAACTGAGCATTCTGTTGCGTAGAATGGCTG  
GGTCCTAAAAACAGCTGTCAGCATGGCATAAGGATCAAGAAACATTATTACACAAGGACA  
AACCACTGAAGGTTGGAGTTTTCTGGAGCTACAAAAGAAGACCGTGTCATTTTACTCCAT  
CACTGACAAAGAAACACTTTTGCACACCTTTGAAATTAGTACTTTAAATCCTCTCTACCCTG  
CTTTCTGGCTGTACACTCTAGAAAGAAATGGATCTTTAACTATAAGTCAGCCAAACAGGAGA  
TAA

>cygnus\_olor-riplet

ATGGCTGCCCAGGCAGAGCTGGGTGCGCTGCTGGCAGACGTGGAGCTGAGCTGCTCCTG  
CTGCCTGCAGTACTTCACCGAACCCATGCGGGCTGGCGAGCTGCAGCCACAGCTTCTGCCG  
GCCCTGCATCGACGCCTACTGCAGGGGGAGGCAGCGCGCCACCTGCCCGCTCTGCCGG  
GAGAGCTTCGAGCTGAAGGACCTGCGGCCCAACCGGGAGCTGGCCGCCCTGGTCAGCCT  
GGTGCTGAACGGGGGAAGGGGCGAGGGGCTGGGGACGTGGGACGAGCGCAGCCCTCT  
GGAGATGGTACCGGCGGTGGATGGAGCTCTGCGGGGCGGCGACCCGGGAAGAAGGAGG

AACAGATACGTGACATCTCCAAACAACTGGAAATAACTGAAGAGACCATCAACGTCTTGAG  
GAAGGATCTCAGTAAAACAAAGGAATATACATCTCAGATCCAAAGCCAGATTACTAAAGACT  
TCTGTTGCATGAAGGAATACATTGAAAGACAGGAGGAAAACACACTGCTGTTTATTGAACA  
GGAGCAAAAAGCAGCTCGACAGAAGATTGAAGAGACTATTCACCAGCTCTGTGTTGAAAAG  
AACAAACTCATAGCCATCAAAGCCCAGATGGAGAAAAGGATTAGGAAGTGATGAAATGAGGT  
GGCAGAATAGTAACTTGCTTGAGAGAGAGGGGAGGCTCACCTTCAACAATGCATAAATTTAC  
AATTGATGAGAAGTTTAATATTGTGTCAGAAGTGCTGCAGGAAATCTTAAGAGAAAGTTGGAAA  
TTTTACTTTTGGAGGAATACCCTCAGCAGTTCCCACCAGTACAATCTCCAGCCTTATATCAA  
GAGACGCGTGTCTGCTCATTATCTTCAGAGTCTGCAGCTAAAAGTCCAGAACCAAGCATTT  
CAAGCCAGTTTTCTCGGTGGGCAGATATTGTGACTTTTGATCTCACCACAGCATAACGACCG  
CTTAGCAATCACAGCTCAGAACAGGAAAGTAATGGTTTCCAGCAACCCAACTTATTATGAAC  
CATCACTCAAGAGATTCTGCATCAGCCAAGTGTTGTGTTCCAGGGCTTCTCTACTGGGTG  
CCACTACTGGGAAGTAATTACCAAGGACAGTGATGGATGGGCTGTTGGAGTTGCTCGTGA  
AACAATTGGTAGAAGGGACAGATTAGGAAGAACAGATCATTCTGTTGTGTAGAATGGGTA  
GGTCCCCAAAAGCAGTTGTCAGCATGGCACAAGAATCAAGAAACACTATTATGCAGTGATA  
AACCATTGAAGTTGGAGTTTTCTGGAGCTACAGAAGACTGTGTCAATTTATGCCATCACT  
GACAAAGAAGTGCTTTTGCATACATTTGAAATCAATACCTCAAATCCTCTTTATCCTGCTTTC  
TGGCTATACAGTCTAGATAAAAATGGATCTTTAACTTTAAATCACATAAACAGGAAGTAA

>dendrocopos\_noguchii-ripley

ATGGCCGCGCTGAGGGCCTGGAGGAGCTTCTGGGCGACGTGGATCTGAGCTGCTCTTG  
CTGCCTGCAGCATTTTACCGACCCCGTGCGCCTCTCGGGCTGCGGCCACAGCTTCTGCC  
GGGCTGTCATCGTCCAGTACGGCAAGAGCAAGCAGCGCGTCAGCTGCCCCGCTCTGCCGG  
GAGGGCTTCGACCTGAAGGACCTGCAGCCCAACCGGGAGCTGGCCATTTTGGTCAGCTTA  
ATCCCGCGGTGGGTCAAGGAGCGAGAGTTGGAACACAGGATGAACCGAAACCTCCGG  
AGCAGTTGCCTGCAACGACTGGAGCTCGGCGGGGCGGCGACCTGCACAGAAGGAGGAAG  
AGATATGCGACATCTCCAAGCAACTTGAAATTACTACAGAAACCATCCAGCTCTTGAGGAA  
AGATCTCAGTAAAGCAAAGGAACATGCATCTCAGATCAAAGCCAGGTTACTAAAGATTTCT  
GTTGCATGAAAGAGTATGTTGAAAGACAGGAGAGAAACACACTGATGTTTATTGAACAAGA  
GCAAAAAGCAGCTGAAGAGAAAAGTGAAGAGACTATTCACCAGCTCTGTGTTGACATGAAC  
AATCTCCTAGACATCAAAGCTGACATGAGTAACCTGACAGACACAGCTACAAAGGCT  
CACCTTCAACAGTGAATAAAATTACACTTGATGAGAAGCTTCATGTGGTCAAAAGTGCTGTA  
GAAGATCTTAAGAGAAAGCTGGAGATCTTACTTTTGGAGAAATACACTTGGCAGTCCCCAC  
CAGTGCCACCTCCAGCCTCAAATCAGGAGAAAAGTGTCTGCTCATCATCTCCAGAGCCTGC  
AGCTCAATATCCAGAACCAGTAATTTCAAGCCAGTTCTCTCAGTGGGCAGATGATGTGACT  
TTTGATCTCACAAGGGTACATGAGCGCTTAGCAATCACAGCCCAGAACAGGAAAGTGATGG  
TCTCCAGCAACCCAACTGATTATAAACCATCGCCCAACAGATTCTGCATCAGTCAAGTGAT  
GTGTTACAGAGCTTCTCTACCGGGTGCCACTACTGGGAAGTAATTACCAAGGACAGTGAT  
GGATGGGCTGTTGGAGTGGCTCATGAAATGATTGGTAAAAGAGATAAATTAGGAAGAACAG  
AGCATTCTGGTGTGTAGAATGGCTAGGTGCCAAAAGCAGCTGTCAGCATGGCATAGGG  
ACCAAGAACTTTATTACACAAGGATAAACCCATGAAGGTTGGAGTTCTGCTGGAGCTACA  
GAAGTCGTCTGTGTCAATTTTACTCCATCACTGACAAAGAAGTGCTTTTGCATGCTTTTGA  
TTGATACCTCAAATCCTCTTTACCCTGCTTTCTGGCTGTATAATCTAGAAAGAAATGGCTCT  
TTAACCATAAGTAGCACAAACAGGAGATAA

>dromaius\_novaehollandiae-ripley

ATGGCGGCCTCTCTGGATCTGCGGCAGCTCCAGGCCACCTGGACCTGAAGTGCCCTG  
CTGCCTGCTGTACTTCACCGACCCCGTGCGGCTCGCGGTCTGCAGCCACAGCTTCTGCCG  
CTCCTGCATCACTGCCTACTGCAAGACAAAGCGGAGCGCCAGCTGCCCGCTCTGCCGCGA  
GGCCTTTGAGCTGAAGGACTTACGGCCCAACCGGGAGCTGGCCGTTCTGGTGAAGTTGAT  
CCCCAGGGAGGAAAAGGAGAAAGATTTGGAGAGATGGGATGTACTGGGACTGGACGGTG  
CCGGTGCCAGCGCCAGGGGCAGCCCAAGCTCAGCGGGGCGGAGAGATGCGGAAAAGGA  
GAAAGCGATAAGTGAGATCTCCAAGCAACTGGAAATGACCGAAGAGACCATCCGCCTCTT  
GAGGAAGGATCTGAGTAAAACAAAGGAATATACATCTCAGATCAAAAGCCAGATTACTGAA  
GATTTCTGTTGCATGAAGGAATACATTGAAAGACAGGAGAGAAACACACTGATGTTTATTG  
AACAACAGCAACAAGCAACTCAACAGAAAATTGAAGAGACTATTGACCAGCTCTGTGCTGA  
AGTGAACAAGCTCACAGGCATCAAAGCCCAACTGGAGGAAGGACTGGTAAGTGATGAAAT  
GAAGTGCGCTGAATGGTTACTTACCTGAGAGAGATGGCTACAAAGGCTCACCTTTAATAATG  
GATAAAATTACACTTGATGAGGAGAAGATTAATTTTGTACAAATGCTGTAGAAGATCTTAA  
GAAACAATTGGAAATGTTACTTTTGGAGAAATACCCTGGGCGGTTCCCCACAGAACAACCTT  
CCAGACTTGCATCAGGAAACAAGGGTCTGCTCATTATCTTCAGAGTCTGCAGCTAAAAATC  
CAGAACCAGGGATTTCAAGCCAGTTTTCTCAGTGGGCAGAGGATGTGACCTTTGATCTCAC  
AAGAATATATCAGCGCTTAGTAATCACAGATCAGAACAGGAAAGTAATGGTTTCCCAGTGT  
CCTGTGATTATGTACCATCGCCCAAGAGATTCTGCATCAGCCAAGTGATGTGTTCCCAGAG  
CTTCTCTACCGGGTGCCATTACTGGGAAATAATTACCAAGGACAGTGATGGATGGGCTGTT  
GGAGTTGCCCATGAAATGATTGGTAGAAGAGAGAAATTGGGAAGATCAGAGCATTCTGGT  
GTGTGGAATGGGTAGGTCCCAAAAAGCAGCTGTCGGCATGGCATAAGGATCAAGAAACAT  
TATTAAACAGGGAGAAGCCATTGAAGGTTGGAGTTTTCTCGAGCTACAAAAGCAGTGTTG  
GTCATTTTACTCCATCACAGACAAAGAAATGCTCTTGACATACTTTTAAATCAATACCTCAA  
TCCTTTATATCCTGCTTTCTGGCTATACAGTCTAGATAGAAATGGATCTTTAACTATAAGTCA  
TACAAGCAGGAGGTAA

>dryobates\_pubescens-riplet

ATGGCCGCGCTGAGGGCCTGGAGGAGCTTCTGGGCGACGTGGATCTGAGCTGCTCTTG  
CTGCCTGCAGTATTTACCGACCCCTGTGCGCCTCTCGGGCTGCGGCCACAGCTTCTGCCG  
GGCCTGCATCGTCCAGTACGGCAAGAGCAAGCAGCGCGTCAGCTGCCCGCTCTGCCGGG  
AGGGCTTCGACCTGAAGGACCTGCAGCCCAACCGGGAGCTGGCCATTTTGGTCAGCTTAA  
TCCCGCGGTGGGTCAAGGAGCGAGAGCTGGAAACACAGGATGAACCGAAACCCTCCGGA  
GCAGTTGCCTGCAACGACTGGAGCTCGGTGGGGCGGCGACCTGGACAGAAGGAGGAAGA  
GATATGTGACATCTCCAAGCAACTTGAAATTACTACAGAGACCATCCAGCTCTTGAGGAAA  
GATCTCAGTAAAGCAAAGGAACATGCATCTCAGATCAAAAGCCAGGTTACTAAAGATTTCT  
GTTGCATGAAAGAGTATGTTGAAAGACAGGAGAGAAACACACTGATGTTTATTGAACAAGA  
GCAAAAAGCAGCTGAAGAGAAAACTGAAGAGACTATTCACCAGCTCTGTGTTGACATGAAC  
AATCTCCTAGACATCAAAGCTGACATGAGTAACTTACCTGACAGACACAGGTACAAAGGCT  
CACCTTCAACAGTGAATAAAATTACACTTGATGAGAAGCTTCATGTGGTCAAAAGTGCTGTA  
GAAGATCTTAAGAGAAAAGCTGGAAATCTTACTTTTGGAGAAATACACTTGGCAGTCCCCAC  
CAGTGCCACCTCCAGCCTCAAATCAGGAGAAAAGTGTCTGCTCATCATCTCCAGAGCCTGC  
AGCTCAATATCCAGAACCAGTAATTTCAAGCCAGTTCTCTCAGTGGGCAGATGATGTGACT  
TTTGATCTCACAAGGGTACATGAGCGCTTAGCAATCACAGCCCAGAACAGGAAAGTGATGG  
TCTCCAGCAACCCAACGGATTATAAACCATCGCCCAACAGATTCTGCATCAGTCAAGTGAT  
GTGTTACAGAGCTTCTCTACCGGGTGCCACTACTGGGAAGTAATTACCAAGGACAGTGAT

GGATGGGCTGTTGGAGTGGCTCATGAAATGATTGGTAAAAGAGATAAATTAGGAAGAACAG  
AGCATTCTGGTGTGTAGAAATGGCTAGGTGCCAAAAAGCAGCTGTCAGCATGGCATAGGG  
ACCAAGAACTTTATTACACAAGGATAAACCCATGAAGGTTGGAGTTCTGCTGGAGCTACA  
GAAGTCGGCTGTGTCATTTTACTCCATCACTGACAAAGAAGTGCTTTTGCATGCTTTTGAAA  
TTGATACCTCAAATCCTCTTTACCCTGCTTTCTGGCTGTATAATCTAGAAAGAAATGGCTCT  
TTAACCATAAGTAGCACAAACAGGAGATAA

>egretta\_garzetta-riplet

ATGGCTGCTGCTGTGACCTCGAGCAGCTCCTGGGCGCTGTGGACCTGACCTGCGCTTG  
CTGCCTGCAGCGCTTCACGGAGCCCGTGCGGCTCAGGGGCTGCAGCCCCAGCCTCTGCC  
GGCCCTGCATCGTCGCGTACTGCAAGGGGAGGCAGCGCCCCGGCTGCCCGCTCTGCCG  
GGAGGGCTTCGAGCTGAAGGACCTGCGGCCCAACCGGGAGCTGGCCGCTTTGGTGAGCT  
TAATCCCGCAGGAGGTGAGGGAAGGAGAGTTGGAACACGGGATGAACCGAAACCCCTCC  
GGACCTGATGCCTGCAGCGACCGGAGCTCGGCGGGGCGGCGACTCGAGGAGAAGGAGG  
AAGAGATATGGGACATCTCCAAGCAACTAGAAATGACTGCAGAGACCATCTGCCTCTTGAG  
GAAAGATCTCACTAAAGCAAAGGAGTATGCGTCTCAGATCAAAGCCAGATTACCAAAGAT  
TTCTGTTGCATGAAGGAATATGTTGAAAGACAGGAGAGACACACACTGATGTTTCATTGAAC  
AAGAGCAAAAAGCAGCTCAGCAGAAAATTGAAGAGACCATTACCAAGCTCTCTGTTGAAGT  
GAACAAGCTCATGGACATCAAAGCCCGAACGAGTAACCTTACCTGAGACACATAGGTACAAA  
GGCTCATCTTCAACAATGAATAAAATTACACTTGAAGAGAAGCTTAATGTTGTCAGAAGTGC  
TGTAAGAAGATCTTAAGAGAAAAGTTGGAATTTTACTGTTGGAGAAATACGCTCAACAGTTCC  
CACCAGTGCAACCTCCAGACTTGTATCAGGAGACAAATGTCTGCTCATTACCTCCAGAATC  
TGCAGCTAAGAATCCAGAACCAATGATTTCAAGCCAGTTTTCTCAGTGGGCAGATGATGTG  
ACTTTTGATCTCACAAGAGTGTATGAGCGCTTAGCAGTATCAGCCCAGAACAGGAAAAGTAA  
TGGTTTCCAGCTACCCGACTGATTATGAACCATCACCCAACAGATTCTGCATCAGCCAAGT  
GATGTGTTACACAGAGCTTCTCTACTGGGTGCCACTACTGGGAGGTAATTACCAAGGACAGT  
GATGGATGGGCTGTTGGAGTTGCTAATGAAATGATTGGTAAAAGGGACAAATTAGGAAGAA  
CAGAGCATTCTGGTGTGTAGAAATGGCTAGGTCCCAAAAAGCAGCTGTCAGCATGGCATA  
GGGGTCAAGAAACATTATTACACAAGGATAAACCATTGAAGGTTGGAGTTTTCTGGAGCT  
ACAAAAGAAGACCGTGTCATTTTACGCCATCACTGACAAAGAAATGCTTTTGCATACATTTG  
AAATCAACACCTCAAATCCTCTTTACCCTGCTTTCTGGCTGTATAGTCTAGAAATAAACGGA  
TCTTTAACTATAAGTCATATAAACAGGAGGTAA

>eopsaltria\_australis-riplet

ATGGCCGCCGTCATCGAGCTCGAGCGGCTGCAGCGCGTCCTGGAGCTGCAATGCTCCTG  
CTGCCTGCAGCTCTTCACGGAGCCGCTGCGGCTCCCGGGCTGCGGCCACAGCTTCTGCC  
GGCTCTGCATCCACCGCTACTGCGGGGAGCGGCCCCGCGCCGCTGCCCGCTCTGCCG  
CCGCCCCCTTCGAGCTCCAGCACCTGCGGCCCAACCGCGAGCTGGCCGCGCTGCTCAGCC  
TCATCCCGCGGGAGCTGAAGGAAAAGTTGGAAGCTCAGGATGGGCCGGAACCCTGTGGA  
GCTGCTGCCTGCAACGACCGGAGCTCGGCGGGGCGGGACCCGGGGAGAAGGAGGAAG  
AGATACAGGAGAGCTCCAAGCAACAAGAAATAACTGCAGAGACCATTACCTGTTGAGGAA  
AGATCTCAATAAAACAAAGGAATATACATCTCAGATCAAAGCCAGATTACTAAAGATTTCT  
GTTGCATGAAGGAATATGTTGAAAGACAGGAGAGAAACACACTGATGTTTCATTGAACAAGA  
GCAAAAAGCTGCTCAACAGAAAATTGAAGAGACTATTACCAAGCTCACAGACATCAAAGCC  
CAAAGTAGTAACCTTACCTGAGAGGCAGACATACAAAGGCTCACCTTCAACAATTACTAAAT  
TACACTTGATGAGAAGCTTAATGTTGTCAAAAATGCTGTAGAAGATCTTAAGAGAAAAGTTGG



```
>eupsittula_pertinax-riplet
```

```
>eurypyga helias-riplet-partial
```

[illegible]

GAACCAGAAATGACTGCAGAGACGATCGACCTCTTGAGGCAAGACCTCAGTAAAGCAAAG  
GAATATGCATCTCAGATCAAACTCAGATTGCAAAAGATTTCTCTTGCATGAAGGAATATGT  
TGAAAGACAGGAGAGAAACACACTGATGTTTCATTGAACAAGAGCAAAAAGCAGCTCAACAG  
AAAATTGAAGCGACTATTCACCAGCTCTGTGGTGAAGCAACTGAGTTCACAGACATCAAAT  
CCCAACCGAGTAACTCCCCTGAGAGACAGAGGCACAAAGGCTCACCTTCAACAATGCATA  
AAATTACGCTTGATGAGAAGCTTAATGTTGTCAAACTGCTGTAGAAGGTCTTAAGAGAAAAG  
TTGAAATTTTACTTTTGGAGAAGTACGCTCGGCAGTTCCCACCGGTGCAACCTCCAGACT  
TGTATCAGGAGAGAAGCGTCTGCTCATTATCTCCAGACTGTGCACCTAAAAATCCAGAAGC  
TATGATTACAAGCCAGTTTTCTCAGTGGGCAGATGATGTGACTTTTGATCTCACAAGAGTAC  
ATAAGCGCTTAGCAGTCACAGCCCAGAACAGGAAAGTCATGGTTTCCAGCTACCCAACTGA  
TTATGAACCCTCACCCAACAGGTTCTGCATCAGCCAAGTGATGTGTTACACAGAGCTTCTCT  
ACTGGGTGCCACTACTGGGAAGTAATTACCAAGGACAGTGATGGATGGGCTGTTGGAGTT  
GCTTATGAAATGATTGGTAAAAGGGACAAATTAGGAAGAACAGAGCATTCTGCTGTGTAG  
AATGGTTAGGTCCCAGAAAGCAGCTGTCAGCATGGCATAGGGATCAAGAAACATTATTACA  
CAAGGATAAACCATTGAAGGTTGGAGTTTTCTTGAGCTACAAAAGAAGACCGTGTCATTTT  
ACTCCATTGCTGACAAAGAAATTCTGCTGCATACATTTGAAATCAACACCTCAAATCCTCTT  
TACCCTGCTTTCTGGCTATACAGTCTAGAAAGAAATGGATCTTTAACTATAAATCCCATAAA  
CAGGAGGTAA

>eurystomus\_gularis-riplet

ATGGCTGCCGCTGTGCGCATCGAGCGGCTCCTGGACGGCCTGGAGCTGAGCTGCGCTTG  
CTGCCTGCAGTACTTCACGGAGCCCGTCCGGCTCAGGGGCTGCGGGCACAGCTTCTGCC  
GGGCTGCATACCCGGTACTGCAAGGGCCGGCAGCGCGCCGGCTGCCCGCTCTGCCG  
GGAGGGCTTCGAGCTCCAGGACCTGCGGCCCAACCGGGAGCTGGCCGCGCTGGTCAGC  
TTGATCCCGCAGTTGGTAAAGGAAGATGAGTTGACAACGCAGGATGAACTGAACCCCCC  
GGAGCTGCTGCTTGCGTCGACCGGAACCCGGCGGAGCGGCGACCTGAGGAGAAGGAAG  
AAGAGACATGGGACATCTCCAAGCAACTTGAAATGACTGCAGAGACCATCCACCTCTTGAG  
GAATGATCTCAGTAAAGCAGAGGAATATGCATCTCAGATCAAAAGCCAGGTTACTAAAGAT  
TTCTGTTGCATGAAGGAATATGTTGAAAGACAGGAGAGAAACACACTGATGTTTCATTGAAC  
AAGAGCAAAAAGCAGCTCAACAGAAAGTGAAGAGACTATTCACCAGCTCTGTGTTGACAT  
GAACGAGCTCCTAGACATCAGTGCCCAACGAGTAACCTACCTGAGAGACATAGACACAAA  
GGCTCACCTTTAACAATGAATAAAATTACACTCAGTGAGAAGCTTCATGTGCTCAAAAGTGC  
TGTGGAAGATCTGAAGAGAAAGTTGGAAATTTTACTTTTGGATAAATACTCAGCAGTTCC  
TACCAGTGCAACCTCCAGACTCTCTCCAGGAGACAAGTGTCTGCTTATTATCTCCAGAGTC  
TGCAGCTCAGAATCCTGAACTGATGATTTCAAGCCAATTTTCTCAGTGGGCAGAGGATGTG  
ACTTTTGATCTCACAAGAGTATACGAGCGCTTAGCAATCACAGCCCAGAACAGGAAAGTAA  
TGGCTTCCAGCTACTCGACTAATTATGATCCATCGCCCAACAGATTCTGCATCAGCCAAGT  
GATGTGTTACACAGAGCTTTTCTACTGGGTGCCACTACTGGGAAGTAATTACCAAGGACAGT  
AACGGATGGGCTGTTGGAGTTGCTCATGAAATGATTGGTAAAAGGGACAAATTAGGAAGAA  
CAGAGCATTCTGGTGTGTAGAATGGCTAGGTTCCAAAAGCAGCTGTCAGCATGGCATA  
GGAATCAAGAAACATTATTACGCAAGGATAAACCATTGAAGGTTGGAGTTTTCTGGAACCT  
GCAAAAGAAGACCGTGTCATTTTACTCCATCACTGACAAAGAAATGCTTTTGCATACTTTTG  
AAATCAATACCTCAAGTCCTCTCTACCCTGCTTTCTGGCTGTATAGTCTAGAAAGAAATGGA  
TCTTTAACTATATGTCACACAGACAGGAGCTAA

>ficedula\_albicollis-riplet

ATGGCCGCCGTCATCGAGCTGGAGCAGCTGCAGCGCGTCCTGGAGCTGCAGTGCTCCTG  
CTGCCTGCAGCCCTTCACCGAGCCCGTGCGGATCACGGGCTGCGGCCACAGCTTCTGCC  
AGGGCTGCATCCTCTCCTACTGCTCGAGCCGGCCCCGCGCCCTCTGCCCCGCTCTGCCGC  
CGCCCCCTTCGAGCCCCGACACCTGCGGCCCAACCGCGAGCTGGCCGCGCTGCTCAGCCT  
CATCCCGCGGGAGCTGCAGGACAGGTGGGACCCGCAGCAGGAGCCGGAGCCCTGTGGA  
GCTGCTGCCTGCAACGACCTGAGTGTGGCGGAGCGGGCACCTGCGGAGAAGGAGGAGG  
AGATATGGGAGAGCTCCAAGCACCAAGAAATAACTGCAGAGACCGTCCACCTGTTGAAGA  
AAGATCTCAATAAAACAAAGGAATATACATCTCAGATCAAAAGCCAGATTACTAAAGATTTC  
TGTTGCATGAAGGAATATGTTGAGAGACAGGAGAGAAACACACTGATGTTTATTGAACAAG  
AGCAAAAAGCTACTCAGCAGAAAATTGAAGAGACTATTACAGCTCACAGACATCAAAGG  
CCAACTAGTGACTTATCTGAGAGGCAGAGGTATGAAGGCTCACCTTCAACAATTAATAAA  
ATTACACTTGATGAGAAGCTTAATGTTGTCAAAGTGCTGTAGAAGATCTTAAGAGAAAGTT  
GGAAATTTTACTTTTGGATAATTACGCTCAGCAACTCCCACCAAGTGCAGCCTCCAGACTCC  
TATCAGGAGCCAAGTGTTTGCTCATCATCTCCAGAGTCTGCAGCTCAAAGTCCTGAACCAA  
GCATTTCCAGCCCCGTTTTCTCAGTGGGCAGAGGATGTGACTTTTTGACCCCAAGAGTACA  
CGAGCGCTTGGCACTCACAGCCCAGAACAGGAGAGTGGTGGTTTCCAGCCACCCAACCAC  
TTATCAACCATCACCCAAAAGATTCTGCATCAGCCAAGTGATGTGTTTACAGGGCTTCTCTA  
CTGGGAGCCACTACTGGCAAGTAATTACCAAGGACAGTGATGGATGGGCTGTTGGAGTTG  
CTCATGAAATGATTGGTAAAAGGGAGAAATTGGGAAGAACTGAGCATTCTGGTGTGTAGA  
ATGGGTGGGTCTTAAAAAACAGCTGTCAGCATGGCATAAGGATCAAGAAACATTATTACAC  
AAGGACAAACCACTGAAGGTTGGAGTTTTCTAGAGCTGCAAAAGAAGACCGTGTCGTTTT  
ACTCCATCACTGACAAAGAAATGCTTTTGCACACCTTTGAAATCAGTACCTCAAATCCTCTC  
TACCCTGCTTTCTGGCTGTACACTCTAGAAAGAAATGGATCTTTAACTATAAGTCAGCCAAA  
CAGGAGATAA

>gallirallus\_okinawae-riplet

ATGGCTGCGGCTGTGGACTTGGAGCGGCTGCTGGGCGCCGTGGAAGTATCTGCACTTG  
CTGCCTGCAGTACTTCACGGACCCGGTGCGGCTGTCGGGCTGCACGCACAGCTTCTGCC  
GGGCTGCATCACCGCCTACTGCAAGGGCCGGCAGCGCGCCGGCTGCCCGCTCTGCCG  
GCACGGCTTCGAGCTGAAGGACCTGCGGCCCAACCGCGAGCTGGCCGCTTTGGTGGGCT  
TGATCCCGCAGGAAGTAAGGGAGAAAGAGTTGGAACGCGGCACGAACCGAAACCCACC  
GGAGCTGTTGCCTGCAACGAGCGGGGGGGCGGCCGGTGCAGCAGCCGGGGAGAAAGGAGG  
AAGAGATATGGGACATCTCCAAGCAACTAGAAGTGACTCTGGAGACTATCCACCTCTTGAG  
GAAGGATCTGAGCACAGCAGAGGAATATGCAGCTCAGATCCAAAGCCAGATTACTAAAGAT  
TTCTGTTGCATGAAGGAGTATGTTGAAAGACAGGAGAGAAACACACTGATGTTTATTGAAC  
AGGAGCAAAAAGCAGCTCAACAGAAAATTGAAGGGACTATTAACCAGCTCTGTGGTGAAGT  
GAACAAGCTCATAGAGATCCAAGCCCAAACGGGTAACTTACCTGAGAGACATAGGTACAAA  
GGATCACCTTCAACAATGAGTAAATTACACTCCATGAGAAGCTCAGTGTTGTCAAAGTG  
CTGTAGAAGGTCTTAAGAGAAAGTTGGAAATTTTACTTTTGGAGAAATACGCTCAGCAGATC  
CCTCCAGTGCAGCCTCTGGACTTGGATCAAGAGACAAGTGTCTGCTCATTACCTCTGGAGA  
CTGCAGCTGCAAGCCCAGAACCAAGTGAAGCCAGTTCTCTCAGTGGGCAGATGACG  
TGACCTTTGATCTCACAAGAGTGTATGAGCGCTTAGCAGTCACAGCCCAGAACAGGAAGGT  
GATGGTTTCCAGCTACGCAACTGACTATGGACCATCGCACACAGGTTCTGCATCAGCCAA  
GTGATGTGCTCACAGAGCTTCTCTACTGGATGCCACTACTGGGAAGTAATTACCAAGGACA  
GCAATGGATGGGCTGTGGGAGTTGCTCATGGAATGATTGGTAAAAGGGACAAATTAGGAA

GAACAGGACATTCTTGGTGTATAGAATGGCTGGGTCCCAAACAGCAGCTGTCAGCATGGC  
ATAGGGATCAAGAAATAGTGTTACACAAGGATAAACCCTGAAGGTTGGAGTTTTGCTGGA  
GCTACAAAAGAAGACAGTATCATTTTACTCCATCACTGACAAAGAAATGCTTTTGCATACAT  
TTGAAATCAATACCTCAGTTCCTCTTTACCCTGCTTTCTGGCTGTATAATCTAGAAAGAAAT  
GGGTCTTTAACTATAAGTGACACAAGCAGGaGGTAA

>gavia\_stellata-riplet-partial

GAGGAAGAGATATGGGACATCTCCAAGCAACTAGAAGTGACTGGAGAGACTATCCACCTC  
TTGAGGAAAGATCTCAGTAAAGCAAAGGAATATGCATCTCAGATCAAAAAACAGATTACTAG  
AGATTTCTGTTGCATGAAGGAGTATGTTGAAAGACAGGAGAGAAAACACATTGATGTTTATT  
GAACAAGAGCAAAAAGCAGCTCAACAGAAAATTGAAGAGACTATTCACCAGCTCTGCGGTG  
AAGTGAACAAGCTCACAGACATCAAAGCCCAAACAAGTAACTTACCTGAGAGACACAGGTA  
CAAAGGCTCCTCTTCAACAATGAATAAAATTACACTTGATGAGAAGCTTAATGTTGTCAAAA  
GTGAGGTAGAAGTTCTTAAGAGAAAGTTGGAAATTTTACTTTTGGAGGAATACGCTCAACA  
GTTCCCAACAGTGCAACCTCCAGACTTATATCAGGAGACAAATGTCTGCTCATTATCTCCA  
GAGTCTGCTGCTAAAAATCCAGAACCAATGATTTCAAGCCAGTTTTCTCAGTGGGCAGATG  
ATGTGACTTTTGTCTCACAAAGAGTATATAAGCGCTTAGCAGTCACAGCCCAGAACAGGAA  
AGTAATGGTTTCCACCTACCCAAGTATTGAACCATCGCCCAACAGATTCTGCATCAGC  
CAAGTGATGTGTTACAGAGCTTCTCTACTGGGTGCCACTACTGGGAAGTAATTACCAAGG  
ACAGTGATGGATGGGCTGTTGGAGTTGCTCATGGAATGATTGGTAAAAGGGACAAATTAGG  
ACGAACAGAGCATTCTGGTGTGTAGAATGGATAGGTCCCAAAAAGCAGCTGTCAGCATG  
GCATAGGGATCAAGAAACGTTGTTGCACAAGGATAAACCATTGAAGGTTGGAGTTTTCTG  
GAGCTACAAAAGAAGACCGTGTCATTTTACTCCATCACTGACGAAGAAATGCTTTTGCATAC  
ATTTGAAATCAATACCTCAAATCCTCTTTACCCTGCTTTCTGGCTATATAGTCTAGAAAGAAA  
TGGATCTTTAACTATAAGTCATACAAACAGGAGGTAA

>geospiza\_fortis-riplet

ATGGCCGCCGTCATGGAGCTGGAGGGGCTGGAGCTGCACTGCTCCTGCTGCCTGCAGCT  
CTTCACGGAGCCCGTGCGGGTCCCGGGCTGCGGCCACAGCTTCTGCCGGGACTGCATCC  
TGCGGTACTGCGCGGGGCAGCCCCGCGTCTCTGCCCGCTCTGCCGCTGCGCCTTCGAG  
CCTCGGCAGCTGCGGCCCCAACCGCGAGCTGGCCGCGCTGCTCAGCCTCATCCCGCGGGA  
GCTGAAGGAAGAGCTGGAAGCACAGGAGGAGCCGGGAGCCCATGGAGCTGCTGCCTGCA  
ACGGCCTGAGCTCGGCGGGGCGGGGCGGTGGGGAGAAGGAGGAAGAGATATGGGAGAG  
CTCCAAGCAACAAGAAATAACTGCAGAGACCATCCACCTGTTGAAGAGAGATCTCAATAAA  
ACAAAGGAATATACATCTCAGATCAAAAGCCAGATTATTAAGATTTCTGTTGCATGAAGGA  
ATATGTTGAAAGACAGGAGAGAAACACACTGATGTTTATTGAACAACAGCAAAAAGCTGCT  
CAACAGAAAATTGAACAGACTATTCACCAGCTCACAGACATCAAAGGCCAAACTAGAGATT  
TATGTGAGAGGCAGAGGCACGAAGGCTCGCCTTTGACAATAAATAAAATTACACTTGATGA  
AAAGCTTAATGTTGTCAAAAGTGCTGTAGAAGATCTTAAGAGAAAGTTGGAAATTTTACTCT  
TGGAGAATTATGCTCAGCATCTCCCACCAGTGATCCTCCAGACTTAGACCAGGAGCCAAG  
TGTCAGCTCATCACCTCCAGAGTCTGCAGAAAGTCCTGAACCAACCATTTCCAGCCAGTTT  
TCTCAGTGGGCAGATGATGTGACTTTTGACCCCAAGAGTACACGAGCGCCTGGCACTC  
ACAGCCCAGAACAGGAGGGTGATGTTTCCAGCCACCTGACCAGTTATCAACCATCACCC  
AAAAGATTCTGCATCAGCCAAGTCATGTGTTACAGGGCTTCTCTACGGGGTGCCACTACT  
GGGAAGTAATTACCAAGGACAGTGATGGATGGGCTGTTGGAGTTGCTCATGAAATGATTG  
GTAAAAGGGACAAATTGGGAAGAACTGAGCATTCTGGTGTGTAGAATGGCTGGGTCCTA

AAAAACAGCTGTCAGCGTGGCATAAGGATCAAGAAACATTATTGCACAAGGACAAACCACT  
GAAGGTTGGAGTTTTCTGGAACACAGAAGAAGACTGTGTCATTTTACTCCGTCTCTGAC  
AAAGAAATGCTTTTGCACACCTTTGAAATCAGTACCTCAGATCCTCTCTACCTGCTTTCTG  
GCTGTACACCCTAGAAAGAAATGGATCTTTAACTATAAGTCAGCCAAACAGGAGATAA

>grus\_nigricollis-riplet

ATGGCTGCTGCTGTCGACCTCGAGCGGCTCCTGGGCGCCGTGGACCTGAGCTGCACTTT  
CTGCCTGCAGTACTTCACGGACCCCGTGCGGCTCACGGGCTGCACCCACAGCTTCTGCC  
GGCCCTGCATCATCGCCTACTGCAAGGGGAGGCAGCGATTGCGCTGCCCGCTCTGCCGG  
AAAGGCTTCCAGCTGAAGGACCTGCAGCCCAACCGGGAGCTGGCCGCTTTGGTGAACCTA  
ATCCCGCAGGAACTAAAGGAAAAAGAGTTGAAACACAAGATGAAACGAAACCCTTCGGA  
GCTGTTCCCTGCAACGACCGCAGCTCGGCGGGGCGGCGACCTGGGGAGAAGGAGGAAG  
AGATATGGGACATCTCCAAGCAACTAGAAACAACCTGCAGAGACTATCCACCTCTTGAGGAA  
AGATCTCAGTACAGCAAAGGAATATGCATCTCAGATCAAAGCCAGATTACTAAAGATTTCT  
GTTGCATGAAGGAATATGTTGAAAGACAGGAGAGAAGCACACTGATGTTGATTGAACAAGA  
GCAAAAAGCAGCTCAGCAGAAAATTGAAGAGACTATTCACCAGCTCTGTGTTGAAGTGAAC  
GAGCTCACAGACATCAAAGCCCAAACGAGTAACTTACCTGAGAGACATAGGTACAAAGGCT  
CCCCTTCAACAATGAATAAAATTACACTTCATGAGAAGCTTAATGTTGTCAAAGTGCCGTA  
GAAGATCTTAAGAGAAAGCTGGAATTTTTACTTTTTGGAGAAATACGCTCGGCAGTTCGCAC  
CAGTGCAACCTCCAGATTTATATCAGGAGACAAGTGTCTGCTTATTATCTCCAGAGTCTGCA  
GCTAAAAATCCAGAACCAATGATTTCAAGCCAGTTCTCTCAGTGGGCAGATGATGTGACTT  
TTGATCTCACAAGAGTGTATGAGCGCTTAGCAATCACAGCCCAGAACAGGAAGGTAATGGT  
TTCCACCTACCCGACTGATTGTGGACCATCACCCAAGAGATTCTGCATCAGCCAAGTGATG  
TGCTCACAGAGCTTCTCTACTGGGTGCCACTACTGGGAAGTAATTACCAAGGACAGTGATG  
GATGGGCTGTTGGAGTTGCTCATGAAATGATTGGTAAAAAGGACAAATTAGGAAGAACAGA  
GCATTCCTGGTGTGTAGAATGGCTAGGTTCCAAAAAGCAGCTGTCAGCATGGCATAGGGA  
TCAAGAAACATTATTACAGAAGGAAAAACCATTGAAGGTTGGAGTTTTGCTGGAGCTACAAA  
AGAAGACCGTGTCATTTTACTCCATCACTGACAAAGAAATGCTTTTGCATACATTTGAAATC  
AATACCTCAAATCCTCTTTACCCTGCTTTCTGGCTATATAGTCTAGAAAGAAATGGATCTTTA  
ACTCTAAGTCACACAAACAGGAGGTAA

>guaruba\_guarouba-riplet

ATGGCTGCCGCGGTGCCTCTGGGGCGGCTGCTGGGCGCGGTGGAGCTGAGCTGCGCCT  
GCTGCCTGCAGCACTTCGTGGACCCGGTGCGGCTTCCGGGCTGCGGCCACAGCTTCTGC  
CGGCCCTGCATCCTCCAGTACGGCGAGGGGAAGCAGCGCGCCGCTGCCCGCTCTGCC  
GAGAGGGCTTCGAGCTGAAGGACGTGCGGCCCAACCGGGAGCTGGCCGCTTTGGTGAAC  
CTTGTCCGGAAGAGGTAAAGGAAGAAGAGTTGGAAGCACAGAATGAACCGAAGCCCCCT  
GCGGCTGCTGCCTGCAACGATGAGAGCTCGACGGGATGGCGACTTGGGGACGAGGAGGA  
AGAGATACAGGACATCTCAAAGGAACTGGAAGTGACTATAGAGACCATCCACCTCTTGAGA  
GAAGAGCTCAGTAAACAAAGGAATACACATCTCAGATCAAAGCCAGATTACAAGAGATT  
TCAGTTGCATGAAGGAATATGTTGAAAGACAAGAGAGACACACACTGGTGTTCATTGACCA  
AGAGCAAAAAGCAGCTGAACAGAAAAATTGAAGAGACTATTCAGCAGCTCTGCATTGAAGTG  
AACAGGCTCACAGACATCACAGCCGAAACAAGCACCCCTAACTGAGAGACATAGGTACAGA  
GACTTGCCTTCAATAATGGATAAAATTGCACTTGATAAGAAACATAATGTTGTCAAAGTGC  
TGTACAAGTTCTTAAGAGAAAGTTGGAAATTTTGCTTTTGGAGAAATACCCTGGGCAGTTCC  
CACCAGTGCAACCACCAGACTTGTATCAAGAGACAAGTGCCTGCTCCTTATCTCCAGAGTC

TGCAGCTAAAAGTCCAGAACCAGTGAATTCAAGCCGTTTTTCCCAGTGGGCAGATGATGTG  
ACTTTTGATCTCAGAAGAGTCTATGAGCGCTTAGCAATCACAGCCCAGAACAGGAAAAGTCA  
TGGTTTCCAGCCACCCGACTGACTATGGACCATCGCCCAATAGATTCTGCATCAGCCAAGT  
GATGTGTTACAGAGCTTCTCTACTGGGTGCCACTACTGGGAAGTAATTACCAAGGACAGT  
GATGGATGGGCTGTTGGAGTTGCTCATAAAATGATTGGTAAAAGGGAAAAAATAGGAAGAA  
CGGAGCATTCTGGTGTGTGGAATGGCTAGGTCCCAGAAAGCAGCTGTCAGCATGGCATA  
GGAATCAAGAAACGTTATTAGACAAAGATAAACCCCTGAGGGTTGGAGTTTTCTGGAGCT  
ACAGAAGAAGACCGTGTCAATTTTACTCCATCACTGACAAAGAAATGCTTTTGCATACTTTTG  
AAATCAGTACCTCAAATCCTCTTTACCCTGCTTTCTGGCTGTATGGCCTAGAAATAAATGGA  
TCTTTAACTATAAGTCACACAAATGGGATGTAA

>halcyon\_senegalensis-riplet

ATGGCCGCCGCTGCCGGCATCGAGCCGCTCCTGGCCGAGGTGGACCTGAGCTGCTCCTG  
CTGCCTGCAGCACTTCAGGGAGCCCGTGCAGCTCAGGGGCTGCGGGCACAGCTTCTGCC  
GGCCCTGCATCACCGAGTACTGCAGGGGCAGGCAGCGTGCCGCCTGCCCGCTCTGCCGG  
CAGCCCTTCGAGCTGCGGGACCTGCGGCCCAACCGCGAGATGGCCGCTTTGGTGAGCTT  
GGTCCCGCACTGCCTCAAGGGAGAGGAGCTGGACACCCAGGGTGAACGGAGCCCTCCCG  
GAGCTGTGCGCTGCAACGACCGGAACCTCGGCGGAGCGGAGACCTGAGGAGAAGGAGGAA  
GAGACATTGAACATCTCCAAGCAACTAGAAATGACTGCAGAGACCATCCACCTCTTGAGGA  
ATGATCTCAGTAAAGCAGAGGAATACGCATCTCAAATTA AAAACCAGATTACTAAAGATTTT  
TGTTGCATGAAGGAATATGTTGAAAGACAGGAGAGAAACACACTGATGTTCAATTGAACAAG  
AGCAAAAAGCAGCTCAACAGAAAACCTGAAGAGACTATACACCAGCTCTGTGTTGACATGAA  
TGAGCTCCTAGACATCAGTGCCCAAATGAGTAACTTACCTGAGAGATATAGATACAAAGGC  
TCAACTTTAAACAACAAATAAAATTACACTTGATGAGAAGCTTAATGTGGTCAAAAGTGCTGT  
AGAAGATCTTAAGAGAAAGATGGAAATTTTACTTTTGGAGAAATACACTTGGCAGTTCCAC  
CAGTGCAACCTGCAGAATTACATCAGGAGACAAGTGTCTGCGCATTATCTCCAGAGTCTGC  
AGCTCAAAATCCAGAACCAATGTTTTCAAGCCAGTTTTCTCAGTGGGCAGAGGATGTGACT  
TTTGATCTCACAAGAATACATGAGCGCTTAGTAATCACAGCCCAGAATAGGAAAGTAATGG  
CTTCAGCTACCCGACTAATTATGAACCATCACCCAACAGATTCTGCATCAGCCAAGTGAT  
GTGTTGCGAGAGCTTTTCTACTGGGTGCCACTACTGGGAAGTGATTACCAAGGACAGTGAT  
GGATGGGCTGTTGGAGTTGCTCATGAAATGATTGGTAAAAGGGACAAATTAGGAAGAACG  
GAGCATTCTGGTGTGTAGAATGGCTGGGTTCAAAAAGCAGCTGTCAGCATGGCACGGG  
AATCAAGAAACAGTATTACAGAAGGATAAACCTTTGAAGTTTGGAGTTTTCTGGAACCTCCA  
AAAGAAGGCTGTGTCATTTTACTCCATCACTGACAGAGAAATGCTTTTACATGCTTTTGA  
TCAATACCTCAAATCCTATTTACCCTGCTTTCTGGCTATATAGTCTAGAAAAAATGGATCTT  
TAACTATAAGTCCCACAAACAGGAGATAA

>haliaeetus\_leucocephalus-riplet

ATGGCTGCCGCTGTGGACCTGGAGCGGCTCCTGGGAGCCGTGGACCTGAGCTGCGCTTG  
CTGCCTGCAGTACTTCACGGAGCCCGTGC GGCTCACGGGCTGCAGCCACAGCTTCTGCC  
GGCCCTGCATCGTCGAGTACTGCAAGGGCAGGCAGCGCGCCGGCTGCCCGCTCTGCCG  
GGAAGGCTTCGAGCTGAAGGACCTGCGGCCCAACCGGGAGCTGGCCGCTTTGGTGAGCT  
TAATCCTGCAGGCGGTGAAGGAAGAAGGGCTGGAAGCACGGGGTGAACCGAAACCTCC  
GGAGCTGTTGCCTGCAACGACCGGAGCTCGGCGGGGCGACCTGGGAAGCAGGAGGACG  
AGATATGGGACATCTCCAAGCAACTAGAAATGACTATAGAGACCATCCATCTCTTGAGGAA  
AGATCTCAGTAAAACAAAGGAATATACATCTCAGATCAAAAGCCAGATTACTAAAGATTTCT

GTTGCATGAAGGAATATGTTGAAAGACAGGAGAGAAACACACTGACATTTATTGAACAAGA  
GGAAAAAGCAGCTCAACAGAAGATTGAAGAGACTATTCACCAGCTCTGTGTTGAAGTGGAC  
AAGCTCACAGACATCCAAGCCCAAACAAGTGACTTACCTGAGAGACATAGTTACAAAGGCT  
TACCTTCAACAAGGAATCAAATTACACTTGATGAGAAGCTTAATGTTGTCAAAAGTGCTGTA  
GAAGATCTTAAGAGAAAAGATGGAAATTTTAATTTTGGAGAAATATTCTTGGAAGTTCCCACC  
AGTGCAAGCTCCAGTCTTGTCATCAGGAGACAAGTGTCTGCTCATTATCTCCAGAGTCTGCA  
GCTAAAAATCCAGAACCAATGATTTCAAGCCAGTTTTCTCAGTGGGCAGATGATGTGACTTT  
TGATCTCACAAGAGTATATAAGCGCTTAGCAATCACAGCCCAGAACAGGAAAGTAATGGTT  
TCCAGCTACCCAAGTATTATGAACCATTGCCAACAGATTCAGCATCAGCCAAGTGATGT  
GTTTCGAGAGCTTCTCTACTGGGTGCCACTACTGGGAAGTAATTACCAAGGACAGTGATG  
GATGGGCTGTTGGAGTTGCTCATGGAACAATTGGTAAAAGGGACAAATTAGGAAGAACAGA  
GCATTCTGGTGTGTAGAATGGCTAGGTTCCAAAAAGCAGCTGTCAGCATGGCATAAGGAT  
CAAGAGACATTGTTACACGAGGATAAACCATTGAAGGTTGGAGTTCTTCTGGAGCTACAAA  
AGAAGACTGTGTCAATTTTACTCTATCACTGACAAAGCAATGCTTTTGCATACTTTTGAATCA  
ATACCTCAAATCCTCTTTACCCTGCTTTCTGGCTATATAGTCTAGAAAGAAATGGATCTTTAA  
CTATAAATCATACGAACAGGAGATAA

>heliornis\_fulica-riplet

ATGGCTGCCGTTGTGGCCCTCGAGCGGCTCCTGGTCCCGTGGACCTGAGCTGCACTTG  
CTGCCTGCAGTACTTCACGGACCCGGTGCGGCTCACGGGCTGCACCCACAGCTTCTGCC  
GGAGCTGCATCATCTCCTACTGCAAGGGGAGGCAGCGCGTCCGGCTGCCCGATCTGCCGG  
GAAGGCTTCGAGCTGAAGGACCTGCGGCCCAACCGGGAGCTGGCCGCTTTGGTGAAGCT  
AATCCCGGAGGAGGTAAAGGAAGAAGAGCTGGAAACACGGGATGAATCGAAAACCATCGG  
AGCTGTTCCCTGCAACGACGGGAGGTGCGCGGGTGGGCAACCTGGGGAGAAGGAGGAA  
GAGATACAGAACATCTCCAAGCAACTAGAAATAACTCTGGAGACTATCCACCACTTGAGGA  
AGGATCTCAGTACAGCAAAGGAATATGCATCTCAGATCAAAAGCCAGATTACTAAAGATTTT  
TGTTGCATGAAGGAATATGTTGAAAGACAGGAGAGAAACACACTGATGTTCAATTGAGCAAG  
AGCAAAAAGAAGCTCAACAGAAAATTGAAGAGACTATTAACCAGCTCAGTGATGAAGTGAA  
CAAGCTTACAGAGATCCAAGACCAAACAAGTAACCTGAAAGGACATAGGTACAAAAGA  
TCACCTTCAACAATGGGTAAAATTACACTTGATGAGAAGCTTAATGTTGTCAAAAGTGCTGT  
AGAAGATCTTAAGAGAAAAGTTGGAAATTTTACTTTTGGAGAAATACGCTCGACAGATCCCTC  
CACAGACAAGTGTCTGCTTAGATCAGAGGACAAGTTTCAAGTGTTTACCTTCAGAGACTGC  
AGCTCGAAATCCAGAGCCAGTGATTTCAAGCCAGTTTTCTCAGTGGGCAGCTGACGTGACT  
TTTGATCTCACAAGAGTCTACGAGCGCTTAGCAATCACAGCCCAGAACAGGAAGGTAAGG  
GTTTCCAGCTACCTGACTGATTATGGACCATCACCCAACAGGTTCTGCATCAGCCAGGTGT  
TGTGCTCACAGAGCTTCTCTACTGGATGCCACTACTGGGAAGTGATTACCAAGGACAGTGA  
TGGATGGGCTGTGGGAGTTGCTCATGAAATGATTGGTAAAAGGGACAAATTAGGAAGAACA  
GGTCATTCCTGGTGCATAGAATGGCTAGGTGGGGAGCAGCAGCTGTCAGCATGGCATAGG  
AATCAAGAAACATTGTTACACAAGGATAAACCATTGAAGGTTGGAGTTTTGCTGGAGCTACA  
AAAGAAGACCGTATCATTTTACTCCGTCACTGACAAAGAAATGCTGTTGCATACATTTGAAA  
TCAATACCTCAAATCCTCTTTACCCTGCTTTCTGGCTATATAGTCTAGAAAAAATGGGTCTT  
TAGCTATAAGTCACACAAACAGGAGGTAA

>heteronetta\_atricapilla-riplet

ATGGCTGCTCAGGCAGAGCTGGGTGGGCTGCTGGCAGATGTGGAGCTGAACTGCTCTTG  
CTGCCTGCAGTACTTCACCGAGCCCGTGCGGCTGGCGAGCTGCAGCCACAGTTTCTGCC

GGCCCTGCATCAACGCCTACTGCAGGGGGAAGCGGCGCGCCCCCTGCCCGCTCTGCCG  
GGAGGACTTCGAGCCGAAGGACCTGCGGCCCAACCGGGAGCTGGCCGCCCTGGTCAGC  
CTGGTGCTGAACGGGGGAAGGGGCGAGGGGCTGGGGACGTGGGACCAGCCCAGACCCT  
CTGGAGATGGTGCCGGCGGTGGATGGAGCTCTGCGGGGCGGCGACCCGGGGAGAAGGA  
GGAACAGATACATGACATCTCCAAGCAACTGGAAATAACTGAAGAGACCATCAGCATCTTG  
AGGAAGGATCTCAGTAAACAAAGGAATATACATCTCAGGTCCAAAGCCAGATTACTAGAG  
ACTTCTGCTGCATGAAGGAATACATCAAAAGACAGGAGGAAAACACACTGATGTTCTGTTGA  
ACAGGAGCAAAGAGCAGCTCAACAGAAGATTGAAGAGACTATTCACCAGCTCTGTGTTGAA  
AAGAACAACCTCAAAGACATCAAAGCCCAGATGGAGAAAGGGTTAGGAAGTGATGAAATGA  
AGTGGCAGAATAGTAACTTCCTTGAGAGAGAGGGGTACAAAGGCTCACCTTCAACAATGAA  
TAACTTAAATTGATGAGAAGTTTAATGTTGTCAGAAAGTGCTGTAGGAGATCTTAAGAGAA  
AGTTGGAAATCTTACTTTTTGGAGGAATACCCTCAGCAGTTCCCACCAGTACAATCTCCAGC  
CTTATATCAAGAGACACGTGTCTGCTCATTATCTTCAGAGTCTGCAGCTAAAAGTCCAGAAC  
CAAGCATTTCAGCCATTTTTCTCGGTGGGCAGATAATGTGACTTTTGATCTCACCACAGCA  
TACGACCGCTTAGCAATCACAGCTCAGAACAGGAAAGTAATGGTTTCCAGCAACCCGACTT  
ACTATGAACCATCACGCAAGAGATTCTGCATCAGTCAAGTGTTGTGTTCCCAGGGCTTCTC  
TACTGGGTGCCACTACTGGGAAGTAATTACCAAGGACAGTGATGGATGGGCTGTTGGAGT  
TGCTTGTGAAACGATTGGTAGAAGGGACAAGTTAGGAAGAACAGAGCATTCTGTTGTGTA  
GAATGGGTAGGTCCCCAAAAGCAGTTGTCAGCATGGCACAAGGATCAAGAAACACTATTAC  
GCAGTGATAAACCATGAAGATTGGAGTTTTCTTGGAGCTACAGAAGATGGTGTCAATTTTAT  
GCCATCACTGACAGAGAAATGCTTTTGCATACATTTGAAATCAATACCTCAGTTCCTCTTTA  
TCCTGCTTTCTGGCTCTACAGTCTAGATAAAAATGGATCTTTAACTATAAATCACATAAACAG  
GAAGTAA

>himantopus\_himantopus-riplet

ATGGCTGCTGCTGTGCGACCTGGAGCGGCTCCTGAGCGCCGTGGAGCTGAGCTGCACTTG  
CTGCCTGCAGTACTTCAGGGACCCGGTGCGGCTCACCGGCTGCACCCACAGCTTCTGCC  
GGTCTGTCATCGTCCGGTACTGCGAGGGGAGGCAGCGCGCCGGCTGCCCGCTCTGCCG  
GGAAGGCTTCGAGCTGAAGGACCTGCGGCCCAACCGGGAGCTGGCCGCTTTGGTGAGCT  
TAATCCCGCAGGAGGCGAAGGAGGAAGAGTTGGACACAGAGGATGAACCGAAACCCTCC  
GGAGCTGTTCCCTGCAGCGGCGGGAGCTCGGCGGGGCGGCGACCTGCGGAGAAGGAGG  
AAGAGATATGGGACGTCTCCAAGCAACTAGAAATGACTACAGAGACCATCCACCTCCTGAG  
GAAAGATCTGAGTAAAGCAAAGGAATATGCATCTCAGATCAAAAGCCAGATTACTGAAGAT  
TTCTGTTGCATAAAGGAATATGTTGAAAGACAGGAGAGAAACACACTGATGTTCTGTTGAAC  
AAGAGCAAAAGGCAGCTCAAGAGAAAATGGAAGAGACTATTCACCAACTCTGTGGTGAAGT  
GAACGAGCTCACAGACACCAAAGCCCCAAACAAGTAACCTCACCTGCGAGACAGAGATAAA  
AGGCTCACCTTCAACAATGACTAAAATTACACTTGATGAGAAGCTTAATGGTGTCAAAGCTG  
CTGTGGAAGATCTTAAGAGAAAGTTGGAAATTTTACTTTTTGAGAAGTACGCTCGGCAGTTC  
CCACCAGTGAAACCTCCAGACTTATACCAGGAGACAAGTGTCTGCTCATTATGTCCAGAGT  
CTGCAGCTAAAAATCCAGAACCAATGATTTCAAGCCAGTTTTCTCAGTGGGCAGCTGATGT  
GACTTTTGATGTCACAAGAGTATATGAGCGCTTAGCAATCACAGCCCAGAAGAGGACAGTA  
ATGGTTTCCAGCTCCCCGACTGATTATGCACCATCGCCCAACAGATTCTGCATCAGCCAAG  
TGATGTGTTCCAGAGCTTCTCTGCTGGGTGCCACTACTGGGAAGTAATTACCAAGGACAG  
TGATGGATGGGCTGTTGGAGTTGTTTCATGAAATGATCGGTAAAAGGGACAAATTAGGAAGA  
ACGGAGCATTCTGGTGTGTAGAATGGCTAGGTCCCCAAAAACAGCTGTCAGCATGGCAT



AGAGATCAAGAAACATTACTACACAAGGAGAAACCATTGAAGGTTGGAGTTTTGCTGGAGC  
TACAAAAGAAGACCGTGTCTTTTATTCCATCACTGACAAAGAAATTCTTTTGCATACATTTG  
AAATCAACACCTCAAATCCTCTTTACCCTGCTTTCTGGCTGTATAGTCTAGAAAGAAATGGA  
TCTTTAACTATAAGTCACACAAACAGAGGATAA

>hirundo\_rustica-riplet

ATGGCCGTCGTCATCGAGCTCGAGCGGCTGCAGGGCGTCCTGGAGCTGCAATGCTCCTG  
CTGCCTGCAGCTCTTCGCGGAGCCGGTGCGGGCTCACGGGCTGCGGGCCACAGCTTCTGCC  
GGGGCTGCATCCTCCAGTACCGCGCGGGGCGGCTCCGCGCCCCCTGCCCGCTCTGCCG  
CAGCGGCTTCGAGCTCCAGCACCTGCGGCCCAACCGCGAGCTGGCCGCGCTGCTCAGCC  
TCATCCCGCGGGAGCTGAAGGAAAAGTTGAAACGCAGGAGGAGCCGGAACCCTATGGA  
GCTGCTGCCTGCATCGACCGGAGCTCGGCAGGGCGGAGACCTGCGGAGAAGGAGGAAG  
AGATATGGGAGAGCTCCAAGCAACAAGAAATAACTGCAGAGACCATCCACCTGTTGAGGA  
AAGATCTCAGTAAAACAAAGGAATATACATCTCAGATCAAAAGCCAGATTACTAAAGATTTT  
TGTTGCATGAAGGAATATGTTGAAAGACAGGAGAGAAACACACTGGTGTTCATTGAACAAG  
AGCAAAAAGCTGCTCAACAGAAAATTGAAGAGATTATTCACCAGCTCACAGACATCAAAGC  
CCAACCTAGTGACTTATCTGAGAGGCAGAGGTATGAAGGCTCAGCTTTAACAATTAATAAA  
ATTACAATTGTTGAGAAGCTTAATGTTGTCAAAAGTGCTGTAGAAGATCTTAAGAGAAAATT  
GGAGACTTTACTCTTGAGAAATTATGCTCAGCAACTCCCACCAGTGACGCTCCAGACTCC  
CACCAGGAGCCAAGCGTCAGCGCATCATCTCCAGAGTCTGCAGCTGGAAGTCCTGAACCA  
GCCATCTCCAGCCAGTTTTCTCAGTGGGCAGAAGATGTGACTTTGGACCCTAGAAGAGTAC  
ACGAGCGCTTGGCACTTACAGCCCAGAATAGGAGAGTGATGGTTTTCCAGCCACCTGACCA  
CTTACCAACCATCACCCAGAAGATTCTGCATCAGCCAAGTGATGTGTTACAGGGCTTCTC  
TACTGGGTGTCACTACTGGGAAGTAATTACCAAAGACAGTGATGGATGGGCTGTTGGAGTT  
GCTCATGAAATGATTGGTAAAAGGGACAAATTGGGAAGAACTGAGCATTCTGCTGTGTAG  
AATGGCTGGGTCTTAAAAACAGCTGTCAGCATGGCATAAGGATCAAGAAACGTTATTACA  
CAAGGACAAACCGCTGAAGGTTGGAGTTTTCTGGAGCTACAGAAGAAGACTGTGTCATTT  
TACTCCATCGCTGACAAAGAAATGCTTTTGCACACCTTTGAAATCAGTACCTCAGATCCTCT  
CTACCCTGCATTCTGGCTGTACACTCTAGAAAGAAATGGATCTTTGACTATAAGTCAGCCAA  
ACAGGAGATAG

>lamprotornis\_superbus-riplet

ATGGCCGCTGTCATCGAGCTCGAGCGGCTGCAGCGCGTCCTGGAGCTGCACTGCTCCTG  
CTGCCTGCAGCTCTTCGCGGAGCCCGTGCGGGCTCACGGGCTGCGGGCCACAGCTTCTGCC  
GGGGCTGCATCCTCCGGTACTGCGCGGGGCGGCCCCGCGCCCTCTGCCCGCTCTGCCG  
GCGCCCCCTTCGAGCCCCAGCACCTGCAGCCCAACCGCGAGCTGGCCGCGCTGCTCAGCC  
TCATCCCGCGGGAGCTGCAGGAAAGCTTGGAAACACAGGAGGAGCCAGAACCCTGTGGA  
GCTGCTGCCTGCAACGACCTGAGCTCGGCGGGGCGGGGACCTGGAGAGAAGGAGGAAG  
AGATATGGGAGAGCTCCAAGCAGCAAGAAATAACTGCAGAGACCGTCCACCTGTTGAGGA  
AAGATCTCGATAAAACTAAGGAATATACATCTCAGATCAAAAGCCAGATTACTAAATATTTCT  
GTTGCATGAAGGAATATGTTGAAAGACAGGAGAGAAACACACTGATGTTTATTGAACAAGA  
GCAAGAAGCTGCTCAACAGAAAATTGAGGAGACTATTCACCAGCTCACAGACATCAAAGCC  
CAAAGTAGTGATTTATCTGAGAGGCAGAGATATGAAGGCTCACCTTCAACAATGTATAAAAT  
TACACTTGATGAGAAGCTTAATGTTGTCAAAAGTGCTGTAGAAGATCTTAGAAGAAAGCTG  
GAAATTTTACTCTTGAAGAATTATGCTCAGCAACTCCCACCAGTGCAACCTCCAGACTCGTA  
TCAGGAGCCAAGTGTCTGCTCATCATCTCCAGAGGCTGCAGCTGAAAGTCCTGAACCAAG

CATTTCCAGCCCATTTTCTCACTGGGCAGAGGATGTGACTTTTGACCCCAACAAGAGTACAT  
GAGCGCTTGGCACTGACAGCCCAGAACAGGAGAGTGATGGTTTCCAGCCATCCAACCACG  
TATCAACCATCACCCAAAAGATTCTGCATCAGCCAAGTGATGTGTTACAGGGCTTCTCTA  
CTGGGAGCCACTACTGGGAAGTAATTACCAAGGACAGTGATGGATGGGCTGTTGGAGTTG  
CTCATGAAATGATTGGTAAAAGGGAGAAATTGGGAAGAACTGAGCATTCTGGTGTGTAGA  
ATGGCTGGGTCCTAAAAACAGCTGTCAGCATGGCATAAGGATCAAGAAACATTATTACAG  
AAGGACAAACCACTGAAGGTTGGAGTTTTTCTGGAGCTACAAAAGAAGACCGTGTCATTTT  
ACTCCATCACTGACAAAGAAATGCTTTTGCACACCTTTGAAATCAGTACCTCAAATCCTCTC  
TACCCTGCTTTCTGGCTGTTCACTCTAGAAAGAAATGGATCTTTAACTATAAGTCAGCCAAA  
CAGGAGATAA

>lepidothrix\_coronata-riplet

ATGGCCGCTGCCATCGAGCTGGAGCGGCTCCTGGCCGCCGTGGAGCTGAGGTGCTCCTT  
GTGCCTGCAGTTCTTCTCGGAGCCGGTGCGGATCGCGGGCTGCAGCCACAGCTTCTGCC  
GGCGCTGCATCAGCCGGTACCGCGCGGGGCCGGCCCGGGCCCGGCTGCCCGCTCTGCAG  
GGAGGGCTTCGAGCTCCGCGACCTGCGGCCCAACCGCGAGCTGGCCGCGCTGCTCAGC  
CTCATCCCGCCAGAGCTGAGCGAGGAGAAGCTGGAAACCGAGGATGAACCCTCTGGAGC  
TGTTGTCTTCGGCGACCGGAGCTCGGCGGGGGGACGACCTGGGGAGAAGGAGGAAGAG  
ATATGGGAAAGCTCCAAGCTACCAGAAATATCTGCGGAGACCATCCCCCTGTTGAGGAGA  
GATCTCAGTAAAACCAAGATCAAAAGCCAGATTACTCGAGATTTCTGTTGCATGAAGGAATA  
TGTTGAAAGACAAGAGAGAAGCACATTGATGTTTCATTGAACAAGAGCAAAAAGCTGCTCAA  
CAGAAGATTGAAGAGACTATTCACCAGCTCACGGACAGCAAAGCCCAAAGTAACTTAC  
CTTATGAAGGCTCACTTTCAATAATGTATAAAATTACACTTGATGAGAAGCTTAATGTTGTCA  
AAAGTGCTGTAGAAGATCTTAAGAGAAAGTTGGAAATGTTACTTTTGGAGAAATACCCTCAG  
CAATTCACCAGTGCAACCTCCAAACTCGTATCAGGAGACAAGTGTCTGCTCATCACCCC  
CAGAGTCTGCAGCTGAGATTCCAGACCTGGTGATTCCAAGCCAGTTTTTCTCAGTGGGCAG  
AGGACGTGACTTTTGACCACACGAGAGCAAACGAGCGCTTGCCCTCACAGCCCAGAACA  
GCAGAGTGGTGGTTTTCCAGCCACCCACCTGGTATGAACCAACTCCCAGGAGATTCTGCA  
TCAGCCAAGTGATGTGTTCCAGAGCTTCTCCACGGGGTGCCACTACTGGGAGGTGATTA  
CCAAGGACAGTGATGGATGGGCTGTTGGAGTCGCTCATGAAATGATTGGGAAGAGGGGACA  
AATTGGGAAGAACAGAGCATTCTGGTGCGTGGAATGGCTGGGTTCCAAAAGCAGCTGT  
CAGCCTGGCACAAGGATCAAGAAACATTGTTACACAAGGATAAACCGCTGAGGGTTGGGG  
TTTTCTGGAGCTACAAAAGCAGACAGTGTCTTTTACTCCATCACTGACAGGGAAATTCTC  
TTGCACACCTTTGAACTCAGCACCTCCCATCCTCTCTATCCTGCCTTCTGGCTGTACAGCC  
TGGAAGAAATGGATCTTTAACTCTAAGCCACCCAAACAGGAGATAA

>lonchura\_striata-riplet

ATGGGCGCCGTCATCGAGCTCGAGAGGCTGCAGCGCGTCCTGGAGCTGCACTGCTCCTG  
CTGCCTGCAGCTCTTCGCGGAGCCCGTGCGGCTCACGGGCTGCGGCCACAGCTTCTGCC  
GGGGCTGCATCCTCCGGTACTGCGCGGGGCGGCGCCGCGCCGCTGCCCGCTCTGCCG  
CTGCGCCTTCGAGCCGCAGCACCTGCGGCCCAACCGCGAGCTGGCCGCGCTGCTCGGC  
CTCATCCCGCGGGAGCTGAGGGACACCTTGGAAGCGCAGGAGGAGCCGCGGGCCTATG  
GAGCTGCTGCCTGCAACGACCTGAGCTCGGCGGGGCGGGGACGTGGGGAGAAGGAGGA  
AGAGATATGGGAGAGCTCCAAGCAACAAGAAATAACTGCAGAGACCATCCACCTGTTGAG  
GAAAGATCTCAACAGAACAAAGGAATATACATCTCAGATCAAATGCCAGATTACTAAAGATT  
TCTGTTGCATGAAGGAATATGTTGAAAGACAGGAGAGAAACACACTGATGTTTCATTGAACA

ACAGCAAAAAGCTGCTCAACAGAAAATTGAAGAGACTATTCACCAGCTCACAGACATCAAA  
GCCCCAACTAGAGACTTATGTGAGAGGCAGATGCACGAAGGCTCACCTTTGACAATAAATA  
AAATTACACTTGATGAAAAGCTTAATGTTGTCAAAAGTGCTGTAGAAGATCTTAAGAGAAAG  
TTGGAAATTTTACTATTGGAGAATTATGCTCAGCAACTCCCACCAGTGCAGCCTCCAGACTT  
CTACCAGGAGCCAAGTGTGAGCTCATCACCTCCAGAGCCTGCAGCTGAAAGTCCTGAACC  
AACCATTTCCAGCCACTTTTCTCAGTGGGCAGATGATGTGACTTTTGATCCCACAAGAGTA  
CACGAGCGCTTGGCACTCACAGCCCAGAACAGGAGAGTGATGGTTTTCCAGCTATCCCACC  
AGTTACCAACCATCCCCCAAAAGATTGAGCATCAGCCAAGTCATGTGTTTACAGGGCTTCT  
CTACTGGGTGCCACTACTGGGAAGTGATTACCAAGGACAGTGATGGATGGGCTGTTGGAG  
TTGCTCATGACATGATTGGTAAAAGGGACAAATTGGGAAGAACTGAGCATTCTGGTGTGT  
AGAATGGCTGGGTCTAAAAAACAGCTATCAGTGTGGCATAAGGATCAAGAAACATTATTA  
CACAAGGACAAACCACTGAAGGTTGGGGTTTTCTGGAGCTAGAGAAGAAGACTGTGTCA  
TTTTACTCTATCGCTGACAAAGAAATTCTTCTGCACACCTTTGAAATCAATACCTCAAATCCT  
CTCTACCCTGCTTTCTGGCTGTACACTCTAGAAAGGAATGGATCTTTAACTATAAGTCAGCC  
AAACAGGAGATAA

>lophochroa\_leadbeateri-riplet

ATGGCTGCCGCGGTGCCCCCTGGGGCGGGCTGCTGGGCGCGGTGGAGCTGAGCTGTGCCT  
GCTGCCTGCAGCACTTCGCGGACCCGGTGCGGCTCCCGGGCTGCGGCCACAGCTTCTGC  
CGGCCCTGCATCCTCCAGTACTGCAAGGGGAAGCAGCGATCCGCCTGCCCGCTCTGCCG  
GGAGGGCTTCGAGCTGAAGGACCTGCGGCCCAACCGGGAGCTGGCCGCTTTGGTGAACC  
TTGTCCGGCAGGAGGTAAAGGAAGAAGAGTTGGAAGCACAGGATGAACCGAAGCCCTCC  
GCAGCTGTTGCCTGCAGCGACCAGAGCTCGGCGGGACGGCGACATGGGGACAAGGAGG  
AAGAGATACAGGACATCTCGAAGGAAGTGAAGTGACTATAGAGACCATCCACCTCTTGAG  
AGAAGAGCTCAGTAAAACAAAGGAATATACATCTCAGATCAAAAGCCAGATTACGAGAGAC  
TTCAGTTGCATGAAGGAATATGTTGAAAGACAGGAGAGACACACACTGGTGTTCATTGAAC  
AAGAGCAAAAAGCAGCTCAACAGAAAATTGAAGAGACTATTCACCAACTCTGCATTGAAGT  
GAACAGGCTCACAGACATCACAGACGAAGCAAGCACCCCTACCTGACAGACATAGGTACAG  
AGACTTGCGTTCAATAATGGATAAAATTACACTTGATGAGAAATTTAATGTTGTCAAAAGTG  
CTGTAGAAGTTCTTAAGAGAAAGCTGGAAATTTTGCTTTTGGAGAAATACCCTGAGCAGTTC  
CCATCAGTGCAACCACCAGACTTGTATCAAGAGACAAGTGTCTGCTCCTTATCTTCAGAGT  
CTGCAGCTAAAAATCCAGAACCAGTGTATTCAAGCCGTTTTTCCCAGTGGGCAGATGATGT  
GACTTTTGTATCTCAGAAGAGCCTATGAGCGCTTAGCAATCACAGCCCAGAACAGGAAAGTC  
ATGGTCTCTAGCCACCCAACTGACTATGGACCATCACCCAACAGATTCTGCATCAGCCAAG  
TGATGTGTTACAGAGCTTCTCTACTGGGTGCCACTATTGGGAAGTAATTACCAAGGACAG  
TGATGGATGGGCTGTTGGAGTTGCTCATAAAATGATTGGTAAAAGGGAAAAATTAGGAAGA  
ACGGAGCATTCTGCTGCGTGGAATGGCTAGGTCCCAAAAAGCAGCTGTCAGCATGGCAC  
AGGAATCAAGAAACGTTATTACACAAGGATAAACCCTGAAGGTTGGAGTTTTGCTGGAGC  
TACAGAAGAAGACTGTGTCATTTTACTCCATCACTGACAAAGAAACGCTTTTGCATACTTTT  
GAAATCAGTACCTCAAATCCTCTTTACCCTGCTTTCTGGCTGTATGGCCTAGAAATAAATGG  
ATCTTTAACTATAAGTCACACAAACAGGACATAA

>lorius\_garrulus-riplet

ATGGCTGCCGCGGTGCCCCCTGGGGCGGGCTGCTGCGCGCGGTGGAGCTGAGCTGCGCCT  
GCTGCCTGCAGCACTTCGCGGACCCGGTGCGGCTCCCGGGCTGCGGCCACAGCTTCTGT  
CGGCCCTGCGTCCTCCAGTACTGCAAGGGGAAGCAGCGCGCAGCCTGCCCGCTCTGCCG

GGAGGGCTTCGAGCTGAAGGACCTGCGGCCCAACCGGGAGCTGGCCGCTTTGGTGAACC  
TGGTCCAGCAAGAGGTAAAGGAAGAAGAGTTGGAAGCACAGAACGAACCGAAGCCCTCTG  
CAGCTGTTGCCTGCAATGACCAGAGCTCGGCGGGATGGCGACATGGGGACAAGGAGGAA  
GAGATACAGGACATCTCGAAGGAACCGGAAGTGA CTATAGAGACCATCCACCTCTTGAGA  
GAAAAGCTGAGTAAAACAAAGGAATATACATCACAGATCAAAAAGCCAGATTACAAGAGATT  
CAGTTGCATGAAGGAATATGTTGAAAGACAGGAGAGACACACACTGGTGTTCATTGAACAA  
GAGCAAAAAGCAGCTGAAGAGAAAATTGAAGAGATTATTCGTCAGCTCTACATTGAAGTGG  
ACAGGCTCACAGACATCACAGCCGAAACAAGGTCCCTACCAGAGAGACACAGGTACAGAG  
ACTTGCCCTTCAATAATGGATAAAATTACACTTGATGAGAACTGAATGTTGTCAAAAGTGCT  
GTAGAAGTTCTTAAGAGAAAGTTGGAATTTTGCTTTTGAGAAATACCCTGAGCGGTTCC  
CACCAGTGGAAACCACCAGACTTGTATCAAGAGACAAAGTGCTGCTCCTTATCTCCAGAGTC  
TGCCGTAAAAGTCCAGAACCAATGAATTCAAGCCGGTTTTCCAGTGGGCAGATGATGTG  
ACTTTTGATCTCAGAAGAGTCTATGAACGCTTAGCAATCACAGCCCAGAACAGAAAAGTCA  
TGGTTTCCAGCCACCCAAGTACTGACTATGGACCATCACCCAATAGATTCTGCATCAGCCAAGT  
GACGTGTTTACAGAGCTTCTCTACTGGGTGCCACTACTGGGAAGTAATTACCAAGGACAGT  
GATGGATGGGCTGTTGGAGTTGCTCATAAAATGATTGGTAAAAGGGAAAAATTAGGAAGAA  
CGGAGCATTCTGGTGTGTGGAATGGCTAGGTCCCAGAAAGCAGCTGTCAGCATGGCACA  
GGAATCAAGAAACATTATTACACAAGGATAAACCCTGAAGGTTGGAGTTTTTCTGGAGCTA  
CAGAAGAAGACTGTGTCATTTTACTCCATCACTGACAAAGAAATGCTTTTGCATACTTTTGA  
AATCAGTACCTCAAATCCTCTTTATCCTGCTTTCTGGCTATATGGCCTAGAAATAAATGGAT  
CTTTAACTATAAGTCACATAAACGGGACATAA

>manacus\_vitellinus-riplet

ATGGCCGCTGCCATCGAGCTGGAGCGGCTCCTGGCCGCCGTGGAGCTGAGGTGCTCCTT  
GTGCCTGCAGTTCTTCTCGGAGCCGGTGCGGATCGCGGGCTGCAGCCACAGCTTCTGCC  
GGCGCTGCATCAGCCGGTACCGCGCGGGCGGCCCGGGCCCGGCTGCCCGCTCTGCAG  
GGAGGGCTTCGAGCTCCGCGACCTGCGGCCCAACCGCGAGCTGGCCGCGCTGCTCAGC  
CTCATCCCGCCAGAGCTGAGCGAGGAGAAGCTGGAAACCGAGGATGAACCCTCTGGAGC  
TGTTGTCTTCGGCGACCGGAGCTCGGCGGGGGGGCGACCTGGGGAGAAGGAGGAAGAG  
ATATGGGAAAGCTCCAAGCAACCAGAAATGTCTGCAGAGACCATCCCCCTGTTGAGGAGA  
GATCTCAGTAAAACCAAGGAATACACATCTCAGATCAAAAAGCCAGATTACTCGAGATTTCTG  
TTGCATGAAGGAATATGTTGAAAGACAAGAGAGAAACACATTGATGTTTCATTGAACAAGAG  
CAAAAAGCTGCTCAACAGAAGATTGAAGAGACTATTCACCAGCTCACAGAGAGCAAAGCCC  
AACTAGTAACTTACCTTATGAAGGCTCACTTTCAATAATGAATAAAATTACACTTGATGAGA  
AGCTTAATGTTGTCAAAAGTGCTGTAGAAGATCTTAAGAGAAAAGTTGGAAATGTTACTTTTG  
GAGAAATACCCTCAGCAATTCCCACCAGTGCAACCTCCAACTCGTATCAGGAGACAAGTG  
TCTGCTCATACCCCCAGATTCTGCAGCTGAGATTCCAGACCTGGTGATTCCAAGCCAGTT  
TTCTCAGTGGGCAGAGGACGTGACTTTTGACCACAGGAGAGCAAACGAGCGCTTGGCCCT  
CACAGCCCAGAACAGCAGAGTGGTGGTTTCCAGCCACCCCACCTGGTATGAACCAGCTCC  
CAGGAGATTCTGCATCAGCCAAGTGATGTGTTCCAGAGCTTCTCCACGGGGTGCCACTA  
CTGGGAGGTGCTTACCAGGGACAGTGATGGATGGGCTGTTGGAGTCGCTCACGAAATGAT  
TGGGAAGAGGGACAAATTGGGAAGAACAGAGCATTCTGGTGCGTGGAATGGCTGGGTTT  
CAAAAAGCAGCTGTCAGCCTGGCACAAGGATCAAGAAACATTGTTACACAAGGATAAACCG  
CTGAGGGTTGGGGTTTTCTGGAGCTACAAAAGCAGACAGTGTCTTTTACTCCATCACTG  
ACAGGGAAATGCTCTTGACACCTTTGAACTCAGCACCTCCCATCCTCTCTATCCTGCCTT

CTGGCTGTACAGCCTGGAAAGAAATGGATCTTTAACTCTAAGCCACCCAAACAGGAGATAA

>melanerpes\_aurifrons-riplet

ATGGCCGCCGCTGAGGGCCTGGAGGGGCTTCTGGGCGACGTGGATCTGAGCTGCTCTTG  
CTGCCTGCAGCATTTTACCGACCCCGTGCGCCTCTCGGGCTGCGGCCACAGCTTCTGCC  
GGGCCTGCATCACCCAGTACGGCAAGAGCAAGCAGCGCGTCAGCTGCCCCGCTCTGCCGG  
GAGGGCTTCGACCTGAAGGACCTGCAGCCCAACCGGGAGCTGGCCATTTTGGTCAACTTA  
ATCCCGCGGTGGGTCAAGGAGCAAGAGTTGGAAACACAGGATGAACCGAAACCTTCCGGA  
GCCTGCAACGACTGGAGCTCGGCGGAGCGGCGACCTGGACAGAAGGAGGAAAAGATATG  
CGACATCTCCAAGCAACTTGAAATTACTACAGAGACCATCCAGCTCTTGAGGAAAGATCTC  
AGTAAAGCAAAGGAACTTGCATCTCAGATCAAAAGCCAGGTTACTAAAGATTTCTGTTGCAT  
GAAAGAATATGTTGAAAGACAGGAGAGAAACACACTGATGTTCAATTGAACAAGAGCAAAAA  
GCAGCTGAAGAGAAAACCTGAAGAGACTATTCACCAGCTCTGTGTTGACATGAACAATCTCC  
TAGACATCAAAGCGGACATGAGTAACTTACCTGACAGACACAGGTACAAAGGCTCACCTTC  
AACAGTGAATAAAATTACACTGGATGAGAAGCTTCATGTGGTCAAAAGTGCTGTAGAAGAT  
CTTAAGAGAAAAGCTGGAGATCTTACTTTTGGAGAAATACACTTGGCAGTCCCTTCCAGTGC  
CACCTCCAGTCTCAAATCAGGAGACAAGTGTCTGCTCATCATCTCCAGAGCCTGCAGCTCA  
ATATCGAGAACCAGTAATTTCAAGCCAATTCTCTCAGTGGGCAGATGATGTGACTTTTGATC  
TCACAAGGATACATGAGCGCTTAGCAATCACAGCCCAGAACAGGAAAGTGATGGTCTCCA  
GCAACCCAACTGATTATAAACCATCGCCCAACAGATTCTGCATCAGCCAAGTGATGTGTTT  
ACAGAGCTTCTCTACTGGGTGCCACTACTGGGAAGTAATTACCGAGAACAGTGATGGATG  
GGCTGTTGGCATTGCTCACGAAATGATTGGTAAAAGAGATAAATTAGGAAGAACAGAGCAT  
TCCTGGTGTGTAGAATGGCTAGGTGCCAAAAAGCAGCTGTCAGCATGGCATAGGGACCAA  
GAACTTTATTACACAAGGATAAACCCATGAAGGTTGGAGTTCTGCTGGAGCTACAGAAGA  
AAGCTGTGTCAATTTTACTCCATCACTGACAAAGAAGTGCTTTTGCATGCTTTTGAATTGAT  
ACCTCAAATCCTCTTTACCCTGCTTTCTGGCTGTATAATCTAGAAAGAAATGGCTCTTTAAC  
TCTCAGTAGCACAAACAGGAGATAA

>melopsittacus\_undulatus-riplet

ATGGCTGCCGCGGTGCCCCTGAGCCGGCTGCTGCGAGCGGTGGAGCTGAGCTGCGCCT  
GCTGCCTGCAGCGCTTCGCGGACCCCGTGCGGCTCCCGGCCTGCGGACACAGCTTCTGC  
CGGCCCTGCATCCTCCAGTACTGCAAGGGGAGGCAGCGCGCAGCCTGCCCCGCTCTGCCG  
GGAGGGCTTCGAGCCCAAGGACCTGCGGCCCAACCGGGAGCTGGCCGCTTTGGTGAACC  
TGGTCCAGCAAGAGGTAAGGAAGAAGAGTTGGAAGCACAGAATGAACCGAAGCCCTCTG  
CAGCTGTTGCCTGCAATGACCAGAGCTCGGCGGGATGGCTACATGGGGACAAGGAGGAA  
GAGATACAGGACAACTCGAAGGAAGTGAAGTGAATATAGAGACCATCCACCTCTTGAGA  
GAGAAGCTCAGTAAAACAAAGGAATATACATCGCAGATCAAAAGCCAGATTACAAGAGATT  
TCAGTTGCATGAAGGAATATATTGAAAGACAGGAGAGACACACACTGGTGTTCATTGAACA  
AGAGCAAAAAGCAGCTGAAGAGAAAAATTGAAGAGGTTATTCATCAGCTCTGCATTGAAGTG  
GACAGGCTCACAGACATCACAGCCAAAACAAGCACCCCTACCAGAGAGACACAGGTACAGA  
GACTTGCCTTCAATAATGAATAAAATTACACTTGATGACAACTGAATGTTGTCAAAGTG  
TGTAAGAGTTCTTAAGAGAAAAGTTGGAAATTTTGCTTTCCGAGAAATACCCTGAGCAGTTCC  
CACCAGTGGAACCACCAGACTTGTGTCAAGAGACAAGTGCTGCTCCTTATCTCCAGAGTC  
TGCCGTAAAAGTCCAGAACCAATGAGTTCAAGCCGGTTTTCCAGTGGGCAGATGATGTG  
ACTTTTGATGTGAGAAGAGTCTATGAACGCTTAGCAGTCACAGCCCAGAACAGAAAAGTCA  
TGGTTTCCAGCCACCCAACTGACTATGGACCATCACCCAATAGATTCTGCATCAGTCAAGT

GACGTGTTACAGAGCTTCTCTACTGGGTGCCACTACTGGGAAGTAATTACCAAGGACAGT  
GATGGATGGGCTGTTGGAGTTGCTCATAAAATGATTGGTAAAAGGGAAAAATTAGGAAGAA  
CAGAGCATTCTGGTGTGTGGAATGGCTAGGTCCCAGAAAGCAGCTGTCAGCATGGCACA  
GGAATCAAGAAACGTTATTACACAAGGATAAACCCTGAAGGTTGGAGTTTTCTGGAGCT  
ACAGAAGAAGACTGTGTCAATTTTACTCCATCACTGACGAAGAAATGCTGTTGCATGCTTTTG  
AAATCAGTACCTCAGATCCTCTTTATCCTGCTTTCTGGCTATATGGCCTAGAAATAAATGGA  
TCTTTAACTATAAGTCACGCAAATGGGACATAA

>melospiza\_melodia-riplet

ATGGCCGCGCTGCTGGAGCTGGAGGGGCTGGAGCTGCAGTGCTCCTGCTGCCTGCAGCT  
CTTCGAGGAGCCCGTGCGGCTCCCGGGCTGCGGCCACAGCTTCTGCCGGGACTGCATCC  
TCCTCTACTGCGCGGGCCGGCCAGCGCCCGCTGCCCGCTCTGCCGGAGCCCCCTTCGAG  
CCTCAGCAGCTGCGGCCCAACCGCGAGCTGGCCGCGCTGCTCAGCCTCATCCCGCGGGA  
GCTGAAGGAAGAGTTGGATGCACAGGAGGAGCCGGGAGCCCATGGAGCTGCTGCCTGCA  
ACGGCCTGAGCTCGGCGGGGCGGGCACGTGGGGAGAAGGAGGAAGAGATATGGGAGAG  
CTCCAAGCAACGAGAAATAACTGCAGAGAGCATCCACCTGTTGAGGAAAGACCTCAATAAA  
ACAAAGGAATATACATCTCAGATCAAAAGCCAGATTATTAAGATTTCTGTTGCATGAAGGA  
ATATGTTGAAAGACAGGAGAGAAACACACTGATGTTCAATTGAACAACAGCAAAAAGCTGCT  
CAACAGAAAATTGAAGAGACTATTCACCAGCTCACAGACATCAAAGCCCCAACTAGAGACT  
TATGTGAGGGGCAGAGGCACGAAGGCTCACCTTTGACAATAAATAAAATTACACTTGATGA  
AAAGCTTAATGTTGTCAAAAGGGCTGTAGAAGATCTTAAGAGAAAGTTGGAAATTTTACTCT  
TGGAGAATTATGCTCAGCATCTCCCACCAGTGCATCTTCCAGACTCAGACCAGGAGCCAAG  
TGTCAGCTCATCACCTCCAGAGTCTGCAGCTGAAAGTCCTGAACCAGCCATTTCCAGCCAG  
TTTTCCCAGTGGGCAGAGGATGTGACTTTTGACCCCAAGAGTACACGAGCGCCTGGCA  
CTCACAGCCCAGAACAGGAGGGTGATGGTTTCCAGCCACCTGGCCAGTTATCAACCATCA  
CCCAAGAGATTCTGCATCAGCCAGGTCATGTGTTACAGGGCTTCTCTACTGGGTGCCACT  
ACTGGGAAGTAATTACCAAGGACAGTGATGGGTGGGCTGTTGGAGTTGCTCATGAGATGA  
TTGGTAAAAGGGACAAATTGGGAAGAACTGAGCATTCTGCTGTGTAGAATGGCTGGGTC  
CTAAAAACAGCTGTCAGCATGGCATAAGAATCAAGAAACATTATTGCATAAGGACAAACCA  
CTGAAGGTTGGAGTTTTCTTGGAGCTACAGAAGAAGACTGTGTCAATTTTACTCCATTGCTGA  
CAAAGAAATGCTTTTGCACACCTTTGAAATCAGTACCTCAGATCCTCTCTACCCTGCTTTCT  
GGCTGTACACTCTAGAAAGAAATGGATCTTTAACTATAAGTCAGCCAAACAGGAGATGA

>menura\_novaehollandiae-riplet

ATGGCCACCGCCATCGACCTGGAGCAGCTTCTGGGCGCCGTGGAGCTGCAGTGCTCCTG  
CTGCCTGCAGTTCTTCGCGGACCCGGTGCGGCTCACGGGCTGCGACCACAGCTTCTGCC  
GGGCCTGCATCGGCCGGTACTGCGCGGGGCGGCAGCGCGCCGGCTGCCCGCTCTGCCG  
CCGCGCCTTCGAGCTCCGCCACCTGCGGCCCAACCGCGAGCTGGCCGCGCTGGTCAGCC  
TCATCCCGCCGGAGCTGAGGGAAGAAAAGTTGGAACACGGGATCAGCCGGAACCCTCT  
GGAGCTGCTGCCTGCAACGACCGGAGCTCGGCGGGGCGGGGACCTGGCGAGAAGGAGG  
AAGAGATATGGGAGAGCTCCAAGCAACTAGAAATAACTGCAGAGACCGTCCACCTGTTGA  
GGAAAGATCTCAATAAAACAAAGGAATATACATCTCAGATCAAAAGCCAGTTACTAAAGAT  
TTCTCTTGCATGAAGGAATATGTTGAAAGACAGGAGAGAAATACACTGATGTTCAATTGAACA  
AGAGCAAAAAGCTGCTCAACAGAAAATTGAAGAGACTATTCATCAGCTCACGGACATCAAC  
GCCCAAACTAGTAACTTACCTGAGAGGCAGAGGTACAAAGGCTCACCTTCAACAATGACTA  
AAATTACACTTGATGAGAAGCTTAATGTTGTAAAAAGTGCTGTAGAAGATCTTAAGAGAAAG

TTGGAAATTTTACTCTTGGAGAATTACACTCGGCAATTCCCACCAGTGCAACCTCCAGACTC  
GTATCAGGAGTCAAGTGTCTGCTCATCAACTCCAGAGTCTGCAGCTGAAAGTCCAGAACCA  
ACCATTTCCAGCCAGTTTTCTCAGTGGGCAGATGATGTGACTTTTGACCACACAAGAGTAC  
ACGAGCGCTTGGCACTCACAGCCCAGAACAGGACAGTGATGGTTTCCAGCCACCTGACTG  
GCTATGAACCATCACCCAAAAGATTCTGCATCAGCCAAGTGATGTGTTACAGGGCTTCTC  
TACTGGGAGCCACTACTGGGAAGTAATTACCAAGGACAGTGATGGATGGGCTGTTGGAGT  
TGCTCATGAAATGATCGGTAAAAGGGACAAATTAGGAAGAACTGAGCATTCTGGTGTGTA  
GAATGGCTGGGTGCCAAAAACAGCTGTCAGCGTGGCATAAGAATCAAGAAACATTATTAC  
ACAAGGATAAACCACTGAAGGTTGGAGTTTTCTTGGAGCTACAAAAGAAGACCGTGTCATT  
TACTCCATCGCTGACAAAGAAATGCTTTTGCACACCTTTGAAATCAGTACCTCAGATCCTC  
TCTACCCTGCTTTCTGGCTGTACAGTCTAGAAAAAATGGATCTTTAACTATAAGTCACCCA  
AACAGGAGATAA

>merops\_nubicus-riplet

ATGGCTGCGGCGGGCGGCATCGAGCGGCTGCTGGGCGGGCTGGAGCTGAGCTGCGCCT  
GCTGCCTGCAGCACTTCACGGAGCCCGTGCGGCTCCGCGGCTGCGGGCACAGCTTCTGC  
CGGGCCTGCATCACCCGGCACGGCCGGGGCCGCGCCCGCGCCGCTGCCCGCTCTGCA  
GGGAGGACTTCGAGCTGAAGGACCTGCGGCCCAACCGCGAGCTGGCCGCGCTGGTGAG  
CCTGCTCCCGCACTGGGAGAAGGAGGAGGAGTTGAAACGCAGGAGGAACCGAAGGCCT  
CCGGAGCTGCTGCCC GCGACGACCCGA ACTCGGCGGAGCGGCGACCTGCCGAGAAGGA  
GGAAGAGATATGGGATGTCTCCAAGCAACTAGAAATGACTGTAGAGACCATCCACCTCTTG  
AGGAATGATCTCAGTAAAGCAAAGGAAAATGAATCTCAGATTAAGCCAGATTACTAAAGA  
TTTCTGTTGCATGAAGGAATATGTTGAAAGACAGGAGAGAAACACACTGATGTTCAATGAAC  
AAGAGCAAAAAGCAATGCAACAGAAAATTGAAGAGACTATTGACCATCTCTGTGCTGATGT  
GAACGAGCTCCTAGACATCAATGCCCAAACAAGTAACCTTCCTGAGAGATATAGATGCAAA  
GGCTTACCTTTAACAATGAATAAAGTTGATGAGAAGCTTAATGTGGTCAAAAGTGCTGTAGA  
AGATCTGAAGAGAAAATTGGAAATTTTACTTTTGGAGAAATACCCTCAGCACTTCCAACCAG  
TACAACCTCCAGACTTACAGCAGGAGACAAGGGTCTGGACATTATCTCCAGAGTCTGCAGC  
TCAAAATCCAGAACCAATAATTTCAAGCCAGTTTTCTCAGTGGGCAGAGGATGTGACTTTTG  
ATCTCACAAGAATACACAAGTACTTGGAACACGACGACCAGAACAGGAAAGTGATGGTGG  
CCAAATACCCGACTAATTATGAACCATCACCCAACAGATTCTGCATCAGCCAAGTGCTGTG  
TTCACAGAGCTTCTCTGCTGGGTGCCACTACTGGGAAGTCATTACCAGGGACAGCAATGG  
ATGGGCTGTTGGAGTCGCTCAGGAAATGATTGGTAAAAGGGACAAATTAGGAAGAACAGA  
GCATTCTGGTGTGTGGAATGGCAGGGTGCCAAAAGCAGCTGTCAGCATGGCATAGGTA  
TCAGGAAACATTATTACACAAGGATAAACATTGAAGATTGGAGTTTTCTGGAAC TACAAA  
AGAAGACTGTGTGCTTTTACTCCATCACTGAGAAAGAAATGCTTTTGCATACTTTTGAAATC  
AATACCTCAAGTCCTCTTTACCCTGCCTTCTGGCTATATAGTCTAGAAAGAAATGGATCTTT  
AACTATAAGTCACGCAAACAGGAGATAA

>mixornis\_gularis-riplet

ATGGCCGCGGTCATCGAGCTGGAGCAGCTGCAGCGCGTCCTGGAGCTGCAGTGCTCCTG  
CTGCCTGCAGCTCTTCGCGGAGCCCGTGCGGCTGACGGGCTGCGGGCCACAGCTTCTGCC  
GGGGCTGCATCCTGCGGTACTGCGCCGGCCGGCCCCGCGCCGCTGCCCGCTCTGCCG  
GAGCGCCTTCGAGCTCCAGCACCTGCGGCCCAACCGCGAGCTGGCCGCGCTGCTCAGCC  
TCATCCCGCGGGAGCCGACAGAAAAGTCGGGAACGCAGGAGGAGCCGGAGCTCTGTGGA  
GCTGCTGCCTGCGACGACCGGAGCTCGGCAGGGCGGAGAGCTGGGGAGAAGGAGGAAG

AGATATGGGAGAGCTCCAAGCATCAAGAAACAACCTGCAGAGACCATCCACCTGTTGAGGA  
AAGATCTCAATAAAACAAAGGAATATACATCTCAGATCAAAAGCCAGATTATTAAGATTTCT  
GTTGCATGAARGAATATGTTGAAAGACAGAAGAGAAACACACTGATGTTTCATTGAACAAGA  
GCAAAAAGCTGCCCAACAGAAAATTGAAGAGACTATTCACCAGCTCACAGACATCAAAGCC  
CAACCTAGTGACTTATCTGAGAGGCAGAAGTACGAAGGTTACCTTCAACAATTAATAAAAT  
TATGCTTGATGAGAAGCTTAATGTTGTCAAAAGTGCTGTAGAAGATCTTAAGAGAAAATTGG  
AACTTTACTCTTGGAGAATTAYGCTCAGCAACTCCCACCAGTGCAGCCTCCAGACTCCTG  
CCAGGAGCCAAGTGTGAGCTCATCATCTCCAGAGTCTGCAGCTGCAAGTCCTGAACCAAC  
CATCTCCAGCCAGTTTTCTCAGTGGGCAGCTGATGTGACTTTGGACCCCAACAAGAGTAGAC  
AAGCACTTGGCACTCACAGCCCAGAACAGGAGAGTGATGGTTTCCAGCCAGCTGACCACT  
TATCAACCATCACCCAAAAGATTCTGCATCAGCCAAGTGATGTGTTCCAGGGCTTCTCTA  
CTGGGTGCCACTACTGGGAAGTAATTACCAAGGACAGTGATGGATGGGCTGTTGGAGTTG  
CTCATGAAATGATTGGTAAAAGGGACAAATTGGGAAGAACTGAGCATTCTGGTGTGTAGA  
ATGGCTGGGTTCTAAAAACAGCTGTCAGCATGGCATAAGGATCAAGAAACATTATTACAC  
AAGGACAAACCACTGAAAGTTGGAGTTTTCTGGAGCTACAAAAGAAGACTGTGTCGTTTT  
ACTCCGTCGCTGACAAAGAAATGCTTTTGCACACCTTTGCAATCAGTACCTCATATCCTCTC  
TACCCTGCTTTCTGGCTGTACAYTCTAGAAAGGAATGGATCTTTAACTATAAGTCAGCCAAA  
GAGGAGATAA

>neopelma\_chrysocephalum-riplet

ATGGCCGCTGCCATCGAGCTGGAGCGGCTCCTGGCCGCCGTGGAGCTGAGGTGCTCCTT  
GTGCCTGCAGTTCTTCTCGGAGCCGGTGCGGATCGCGGGCTGCAGCCACAGCTTCTGCC  
GGCGCTGCATCAGCCGGTACCGCGCGGGGCCGGCCCGGGCCCGGCTGCCCCCTCTGCAG  
GGAGAGCTTCGAGCTCCGCGACCTGCGGCCCAACCGCGAGCTGGCCGCGCTGCTCAGCC  
TCATCCCGCCAGAGCTGAGCGAGGAGAAGCTGGAAACCGAGCATGAACCCTCTGGAGCT  
GTTGTCTTCGGCGACCGGAGCTCGGCGGGGCGGCGACCTGGGGAGAAGGAGGAAGAGA  
TATGGGAAAGCTCCAAGCAACCAGAAATATCTGCAGAGACCATCCCTGTGTTGAGGAGAG  
ATCTCAATAAAACCAAGGAATACACATCTCTGATCAAAAGCCAGATTACTCGAGATTTCTGT  
TGCATGAAGGAATATGTTGAAAGACAAGAGAGAAACACATTGATGTTTCATTGACCAAGAGC  
AAAAAGCTGCTCAACAGAAGATTGAAGAGACTATTCACCAGCTCACAGACAGCAAAGCCCA  
AACTAGTAACCTCACCTTACAAAGGCTCACTTTCAATAATGAATAAAATTACACTTGATGAGAA  
GCTTAATGTTGTCAGAAGTGCTGTAGAAGATCTTAAGAGAAAGTTGGAAATGTTACTTTTGG  
AGAAATACCCTCAGCAATTCCCATCAGTGGAACCTCCAGACTCATATCAGGAGACAAGTGT  
CTGCTCATCACCCCCGAGTCTGCAGCTGAAATTCCAGAGCCGGAGATTCCAAGCCAGTT  
TTCTCAGTGGGCAGAGGACGTGACTTTTGACCACACGAGAGCACACGAGCGCTTGGCCCT  
CACAGCCCAGAACAGCAGAGTGGTGGTTTCCAGCCACCCACCTGGTATGAACCATCTCC  
CAAGAGATTCTGCATCAGCCAAGTGATGTGTTCCAGAGCTTCTCCACGGGGTGCCACTA  
CTGGGAGGTGATTACCAAGGACAGTGATGGATGGGCTATTGGAGTTGCTCATGAAATGATT  
GGGAAGAGGGACAAATTGGGAAGAACAGAGCATTCTGGTGTGTGGAATGGCTGGGTTCC  
AAAAAGCAGCTGTCAGCCTGGCACAAGGATCAAGAAACATTGTTACACAAGGATAAACCGC  
TGAGGGTTGGAGTTTTCTTGGAGCTACAAAAGCAGACAGTGTCTTTTACTCCATCACTGA  
CAGGGAAATGCTCTTGACACCTTTGAACTCAGCACCTCCCATCCTCTCTATCCTGCCTTC  
TGGCTGTACAGCCTGGAAAGAAATGGATCTTTAACTCTAAGCCACCCAAACAGGAGATAA

>nettapus\_auritus-riplet

ATGGCTGCTCAAGCAGAGCTGGGTGGGCTGCTGGCAGACGTGGAGCTGAGCTGCTCCTG



CTGCCTGCAGTACTTCACCGAGCCCGTGCGGCTGGCGAGCTGCAGCCACAGCTTCTGCC  
GGCCCTGCATCGACGCCTACTGCAGGGGGAAGCGGCGCGCCCCCTGCCCGCTCTGCCG  
GGAGGGCTTCGAGCCGAAGGACCTGCGGCCCAACAGGGAGCTGGCCGCCCTGGTCAGC  
CTGGTGCTCCACGGGGGAAGGGGCGAGGGGCTGGGGACGTGGCACGAGCCCAGAGCCT  
TTGGAGATGGTGCCGGCGGTGGATGGAGCTCTGCGGGGCGGCGAGCCGGGGAGAAGGA  
GGAACGGATACGTGACATCTCCAAACAACTGGAATAACCGAAGAGACCATCAGCATCTTG  
AGGAAGGATCTCAGTAAAACAAAGGAATATGCATCTCAGATCCAAAGCCAGATTACTAAAG  
ACTTCTGTTGCATGAAGGAATACATCGAAAGGCAGGAGGAAAACGCACTGATGTTCAATTGA  
ACAGGAGCAAAGAGCAGCTCGACAGAAGATTGAAGAGACTATTCACCAGCTCTGTGTTAAA  
AAGAACAACTCATAGACATCAAAGCCCAGATGGAGAAAGGATTAGGAAGTGATGAAATGA  
AGTGGCAAATAAGTAACTTACTCGAGAGAGAGGGGTACAAAGGCTCACCTTCAACAAGGAA  
TAAATTTATAATCGATGAAAAGTTTAACATTGTCAGAAGTGCTGTAGGAGATCTTAAGAGAA  
AGCTGGAAATTTTACTTTTGGAGGAATACCCTCAGCAGTTCTCACCAGTACAATCTCCAGC  
CTTGTATCAAGAGACAAGCGTCTGCTCATCATCTTCAGAGTCTGCAGCTAAAAGTCCAGAA  
CCAAGCATTTCAGGACAGCTTTCTCGGTGGGCAGATAATGTGACTTTTGATCTCACTACAG  
CATATGACCGCTTAGCAATCACAGCTCAGAACAGGAAAGTAATGGTTTTCCAGCAACCCAAC  
TACTATGAACCATCACCCAAGAGATTCTGCATCAGCCAAGTGTTGTGTTCCAGGGCTTC  
TCTACCGGGTGCCACTACTGGGAAGTAAGTACCAAGGACAGTGATGGATGGGCCGTTGGA  
GTTGCTCGTGAAACGATTGGTAGAAGGGACAGATTAGGAAGAACAGAGCATTCTGGTGT  
GTCGAATGGGTAGGTCCCCAAAAGCAGTTGTCAGCATGGCACAAGAATCAAGAAACACTAT  
TACACAGTGATAAACCATTGAAGGTTGGAGTTCTCCTGGAGCTACAGAAGACCGTGTCATT  
TTATGCCATCACTAACAGAGAAATGCTTTTGCATACATTTGAAATCAATACTTCTGATCCTCT  
TTATCCTGCTTTCTGGCTCTACAGTCTAGATAAAAATGGATCTTTAACTATAAATcAGTTAA  
CAGGAAGTAA

>nipponia\_nippon-riple

ATGGCTGCTGCTGTCGACCTCGAGCGGCTGCAGGCCGCCGTGGAGCTGCGGTGCGCTTG  
CTGCCTGCAGTACTTCAGGGAGCCGGTGCGGCTGAGGGGCTGCGGCCACAGCTTCTGCC  
GGCCCTGCATCGTCGCGTACTGCAAGGGGAGGCAGCGCGCCGGCTGCCCGCTCTGCCG  
GGACGGCTTCGAGCTGAAGGACCTGCGGCCCAACCGGGAGCTGGCCGCTTTGGTGAGCC  
TAATCCCGCAGGAGGAAAAGGAAGAAGAGTTGGAACACAGGATGAACCGACCCCCTCCG  
GAGCTGTTGCCTGCAACGACCGGAGCGCGGGGCGGAGCAGCTGGGGAGAAGGAGGA  
AGAGATATGGGACATCTCCAAGCAACTAGAAATGCCTGCAGAGACCATCCGCCTCTTGAG  
GAAAGATCTCAGTGAAGCGAAGGAATATGCATCTCGGATCAAAAGCCAGATTACTAAAGAT  
TTCTGTTGCATGAAGGAATATGTTGAAAGACAGGAGAGAAACACACTGATGTTCAATACACA  
AGAGCAAAAAGCAGCTGAACAGAAAATTGAAGAGACTATTCACCAGCTCTGTATCGAGGGG  
AACAAGGTCACAGACATCAGAGCCCAAATGAGTAACTTACCTGAGAGACATAGGTACAAAG  
GCTCACCTTCAACAATGAATAAAATTACACTTGATGAGAAGCTTAATGTTGTCAAAGTGCT  
GTAGAAGATCTTAAGAGAGAGTTGGAATTTTACTTTTGGAGAAGTACGCGCGGCAGTTCC  
CACCAGTGCAACCTCCAGACTTACATCAGGAGACAAAGGTCTGCTCATCATCTCCAGAATC  
TGCAGCTAAAAATCCAGAAACAATGATTTCAAGCCAGTTTTCTCAGTGGGCAGATGATGTG  
ACTTTTGATCTCACAAGAGTATATGAGCGCTTAGCAATCACAGCTCAGAACAGGAAAGTAAT  
GGTTTCCAGCTACCCAACCTATTATGAGCCATCGCCCAACAGATTCTGCATCAGCCAAGTG  
ATGTGTTGCGAGAGCTTCTCTACTGGGTGCCACTACTGGGAAGTAATTACTAAGGACAGTG  
ACGGATGGGCTGTTGGAGTTGCTCATGAAATGATTGGTAAAAGGGACAAATTAGGAAGAAC

GGAGCATTCTGGTGTATAGAATGGCTAGGTCCCAAAAAGCAGCTGTCAGCATGGCACAG  
GAATCAAGAAACGTTATTGCACAAGGATAAACCATCGAAGGTTGGAGTTTTCTGGAGCTA  
CAAAAGAAGACCGTGTCATTTTACTCCATCACTGACAAAGAAATGCTTTTGCATACATTTGA  
AATCAATACCTCAAATCCTCTTTACCCTGCTTTCTGGCTATATAGTCTAGAAAGAAATGGAT  
CTTTAACTATAAGTCATACAAACGGGAGGTAA

>nyctibius\_grandis-riplet

ATGGCTGCTGCTGTCGACCTCGAGCGGCTCCTGGGCGCCGTGGACCTGACCTGCACTTG  
CTGCCTGCAGTACTTCAGGGACCCGGTGCGGCTCCCGGGCTGCACCCACAGCTTCTGCC  
GGCGCTGCATACCGCGTACTGCGGGGGCAGGCGGCGCGCGGCTGCCCGCTCTGCCG  
GGAGGGCTTCGAGCTGAGGGACCTGCGGCCCAACCGCGAGCTGGTCGCTTTGGTGAAC  
TAATCCCGCAGGAGGTAAAGGAGGAAGACTTGAAACACCGGATGAACTGAAACCCTCCG  
GAGCTGTTGCCTGCAGCCACCGGAGCTCGGCGGGGCGGCGACCTGGGGAGAAGGAGGA  
AGAGGTATGGGACATCTCCAAGCAACTAGAAATGGCTACAGAGACCATCCACCTCTTGAG  
GAAAGATCTCAGTAAAGCAAAGGAATATGCATCTCAGATCAAAAGCCAGATAACTAAAGATT  
TCTGTTGCATGAAGGAATATGTTGAAAGACAGGAGAGAAACACACTGATGTTTCATTGAACA  
AGAGCAAAAAGCAGCTCAACAGAAAATTGAAGAGACTATTCACCAGCTCTGTGATGAAGTG  
AACACGCTCACAGACATCAAAGCCCAAACAAGTAACTTACCTGAGAGACATAGGTACAGAG  
GCTCACCTTCAACAATGAATAAAATTACACTTGATGAGAAGCTTGATGTTGTCAAAGTGCT  
GTAGAAGATCTTAAGAGAAAGTTGGAAATTTTACTTTTGGAGAAATATGCTCGGCAGTTCCC  
AGCAGTGCAACCTCCAGACTTAGATCAGGATACAAATGTCTGCTCATTATCTCCAGAGTCT  
GCAGCTAAAAATCCAGAACCAATGATGCCAAGCCAGTTCTCTCAGTGGGCAGATGATGTGA  
CTTTTGATCTCACAAGAGTATATGAGCGCTTAGCAATCACAGCCCAGAACAGGAAAGTGAT  
GGTTTCCAGCTACCCGACTGGTTATGAACCATCACCCAACAGATTCTGCATCAGCCAAGTG  
ATGTGTTCCCAGAGCTTCTCTGCTGGCTGCCACTACTGGGAAGTAATTACCAAGGACAGTG  
ATGGTTGGGCTGTTGGAGTTGCTCATGAAATGATTGGTAAAAGAGACAAATTAGGAAGAAC  
AGAGCATTCTGGTGTGTGGAATGGCTAGGTGCCAAAAAGCAGCTGTCAGCATGGCATAG  
AGATCAAGAAACATTTTTACACAAGGATAAACCATTGAAGGTTGGAGTTTTCTGGAGCTAC  
AAAAGAGGACTGTGTCATTTTACTCCATCACTGACAAAGAAATGCTTTTGCATACTTTTGAA  
ATCAATACCTCAAATCCTCTTTACCCTGCTTTCTGGCTATATAGTCTAGAAAGAAATGGATC  
GTAACTATAAGTCACACAAATAGCAGGTAA

>oceanodroma\_tethys-riplet

ATGGAGGCTGCTGCGGTCCTGGAGCGGCTCCTGGGCGCCGTGGAGCTGCGCTGCGCTTG  
CTGCCTGCAGTACTTCACGGACCCGGTGCGGCTCATGGACTGCAGCCACAGCTTCTGCCG  
GCCCTGCATCATCCAGTACTGCAAGGGGGCGGCAGCGCAGCGGCTGCCCGCTCTGCCGGC  
AGGACTTCGAGCTGAAGGACCTGCGGCCCAACCGGGAGCTGGCCGCTTTGGTGAACCTAA  
TCCCGCAGGAGGTAAAGGAAGAAGAGTTGGAAGCACAGGATCAACTGAAACCCTCCGGAG  
CTGTTGCCTGCGACGACCGGAGTTCGGTGGGGCGGCGAGCTGGGGAGAAGGAGGAAGA  
GATATGGGACATCTCCAAGCAACTAGAAATGACTGCGGAGACCATCCACCTCTTGAAGAAA  
GATCTCAGTAAAGCAACGGAATATGCATCTCAGATCAAAAGCCAGATTACTAAAGATTTCTG  
TTGCATGAAGGAATACATTGAAAGGCAGGAGAGAAACACACTGATGTTTCATTGAACAAGAG  
CAAAAAGCAGCTCAACAGAAAATTGAAGAGACTATTCACCAGCTCTGTGTTGAAGTGAACG  
AGCTCATAGACATCAAAGCCCAAACGAGTAACTTACCTGAGAGGCATAGGTACAAAGAATC  
ACCTTCAACAATGAATAAAATTACACTTGATGAGAAGCTTAATGTTGTCAAAGTGCTGTAG  
AAGATCTTAAGAGAAAGTTGGAATTTTACTTTTGGAGAAGTACACTCAGCAGTTCCCACCA

GTGCAACCTCCAGACTTATATCAGGAGACAAATGTCTACTCATTATCTCCAGAGTCTGCAG  
CTAAAAATCCAGAACCAATGATTTTCGAGCCAGTTTTCTCAGTGGGCAGATGATGTGACTTTT  
GATCTCAAAAGAGTAAATGACCGCTTAGCAATCACAGCCCAGAACAGGAAAATAATGGTTT  
CCAGCTACCCGACTTATTATGAACCATCGCCCAACAGATTCTGCATCAGTCAAGTGATGTG  
TTTGCAGAGCTTCTCTACTGGGTGCCACTACTGGGAAGTAATTACCAAGGACAGTGATGGA  
TGGGCTGTTGGAGTTGCTCATGAAATGATTGGTAAAAGGGACAAATTAGGAAGAACAGAGC  
ATTCTGGTGTGTAGAAATGGCTAGGTCCCAAAAAGCAGCTGTCAGCATGGCATAGGGATC  
AGGAAACATTAGTACACAAGGATAAACCAGTGAAGGTTGGAGTTTTCTGGAGCTACAAAA  
GAAGATGGTGTCATTTTACTCCATCACTGACAAAGAAACGCTTTTGCATACATTTGAAATCA  
ATACCTCAAATCCTCTTTACCCTGCTTTCTGGCTATATAGTCTAGAAAGAAATGGATCTTTAA  
CTATAAATCACCCAAACAGGAGATAA

>opisthocomus\_hoazin-riplet-partial

GAGGAAGAGATACGGGACATCTCCAAGCAAGTGGAAGTGACTGCAGAGACCATCCACCTC  
TTGGGGAAAGATCTCAGTAAAGCGAAGGAGTATGCATCTCAGATCAAAAGCCAGGTTATGG  
AAGATTTCTGTTGCATGAAGGAATATGTTGAAAGACAGGAGAGAAACACGCTGATGTTTCAT  
TGAACAAGAGCAAAAAGCAGCTGAACAGAAAATTGAAGAGACTATTCACCATCTCTGTGTT  
GAAGTGGACAGGCTCCTAGACATCAACGCCCCAGACAGGTAACCTTACCTGAGAGACATAGT  
TACAGAGGCTCACCTTCAGCAATGAGTAAAATTACACTTGATGAGAAGCTTAATGTTGTCAA  
AACTGCTGTAAAAGATCTTAAGAGAAAAGTTGGAAATTTTACTTTTGGAGATGTACGCTCGGC  
AGTTCCCACTAGTGCAACCTCCAGACTTTTCATCAGGAGACGGATCTCTGCTCATTATCTCC  
AGAGTCTGCAGCTAAAAATCCAGAACCAATGATTTCAAGCCAGTTTTTCTCAGTGGGCAGAG  
GATGTGACTTTTTCATCTCAGAAGAGTATATGAGCGCTTAGCAATCACAGACCAGAACAGGA  
AGGTAATGGTTTGCAGCTACTCGACTGATTATGGACCATCACCCAACAGATTCTGCATCAG  
CCAAGTGATGTGTTTCACAGAGCTTCTGTACTGGGAGCCACTACTGGGAAGTGCTTACCAAG  
GACAGTGATGGATGGGCTGTTGGAGTTGCTCACGAAATGATTGGTAAAAGGGACAAATTAG  
GAAGAACAGAGCATTCTGTTGTGTAGAAATGGCTAGGTCCCAAAAAGCAGCTGTCAGCAT  
GGCATAGGGATCAAGAAATGTTGTTACATGAGGATAAACCATTGAAGGTTGGAGTTTTCT  
GGAGCTACAAAAGAAGACCGTGTCATTTTACTCCATCACTGACAAAGAAACGCTTTTGCAT  
GCATTTGAAATCAATACTTCAAATCCTCTTTACCCTGCTTTTTGGCTGTATAGTCTAGAAAAA  
AATGGATCTTTAACTATAAGTCACACAAACAGGAGGTAG

>otus\_sunia-riplet

ATGGCCGCTGCCGTGGACCTCGAGCGGCTCCTGAGCGCCGTGGAGCTGAGCTGTGCCTG  
CTGCCTGCAGCACTTCACGGAGCCCGTGCGGCTCACGGGCTGCGGGCACAGTTCTGCC  
GGGCTGCATCGTCACGTACTGCAAGGGCAGGCAGCGCGCCGGCTGCCCCGCTCTGCCG  
GGAGGGCTTCGAGCTGAAGGACCTGCGGCCCAACCGGGAGCTGGCCGCTCTGGTGAACC  
TCGTCCTGAAGGAGGTACAGGGAGAAGAGTTGGAAACGCGGCATGAACCGGGACCCTCC  
CGAGATGTTGCCTGCAACGACCAGAGCTCGGCGGGGCGGCGACCTGGGGAGAAGGAAG  
AAGAGATATGGGACATCTCCAAGCAACTAGAAACAACCTGCAGAGACCATCCACCTCTTGAG  
GACAGATCTCAGTAAAACAAAGGAATATGCATCTCAGATCAAAAGCCAGATTACTAAAGATT  
TCTGTTGCATGAAGGAATATGTTGAAAGACAGGAGAGAAACACACTGAGGTTTATTGAACA  
AGAGCAAAAAGCAGCTCAACAGAAAATTGAAGAGACTATTCACCAGCTCTGTGTGGAAATG  
AACAAGCTCACAGACATCAAAACCCAAACGAGTAACCTTATCTGAGAGACATAGGTACAAAG  
GCTCACCTTCAACAGTGGATAAAATTACCCTTGATGAGAACTTAATGTTGTCAAACTGCT  
GTAGAAGATCTTAAGAGAAAGTTGGAAATTTTACTTTTGGAGAAGTATGCTCGGCAGTTCTT

ACCAGCACAACTCCAGACTTATATCAGGAGAAAAATGTCTGCTCATTATCTCCAGAGTCT  
GCAGCTAAAAATCCAGAACCAATGATTTCAAGCCCGTTTTCTCAGTGGGCAGATGATGTGA  
CTTTTGATCTCACGAGAGTATATGAGCGCTTAGCAATCACAGCCCAGAACAGGAAAGTAAT  
GGTTTCCAGCTACCCGACCGATTATGAACCATCACCCAACAGATTCTGCATCAGCCAAGTG  
ATGTGTTTCGAGAGCTTCTCTACTGGGTGCCACTACTGGGAAGTAATTACCAAGGACAGCG  
ATGGATGGGCTGTTGGAGTTGCTCATGAAATGATTGGTAAAAGGGACAAATTAGGAAGAAC  
AGAGCATTCTGGTGTGTAGAAATGGCTAGGTCCCCAAAAGCAGCTGTCAGCATGGCATAG  
GGATAAAGAAACATTATTGCACAAGGATAAACCAATTGAAGGTTGGCATTTCCTGGAGCTA  
CAAAAGAAGACTGTGTCGTTTTATTCCATCACTGACAAAGAAATGCTTTTGCATACTTTTGA  
AATCAATAGCTCAAATCCTCTTTACCCTGCTTTCTGGCTATATAGTCTAGAAAGAAATGGAT  
CTTTAACTATAAATCACACAACTGCAATAA

>parotia\_lawesii-riplet

ATGGCCGCCGTCATCGAGTTTCGAGCGGCTCCAGCGCGTCCTGGAGCTGCAGTGCTCCTG  
CTGCCTGCAGTTCTTCGCGGAGCCGGTGCGGCTCACGGGCTGCGGCCACAGCTTCTGCC  
GGGGCTGCATCCTCCGGTACTGCGCGGGGCGGCCCGCGCCGCTGCCCGCTCTGCCG  
GCGCGGCTTCGAGCTCCGCCACTTGCGGCCCAACCGCGAGCTGGCCGCTCTGCTCAGCC  
TCATCCCGCGGGAGCTGAAGGAAAAGTTGGAACGCAGGATGGACCGGAACCCTGTGGA  
GCTGCTGCCTGCAACGACCAGAGCTCGGCGGGGCGGGGACCTGGGGAGAAGGAGGAAG  
AGATATGGGAGAGCTCCAAGCAAGAAGAAATAACTGCAGAGACCGTCCACCTTTTGAGGA  
AAGATCTCAATAAAACAAAGGAATATACATCTCAGATCAAAAGCCAGATTACTAAAGATTTC  
TGTTGCATGAAGGAATATGTTGAAAGACAGGAGAGAAACACACTGATGTTCAATTGAACAAG  
AGCAAAAAGCTGCTCAACAGAAAATTGAAGAGACTATTCACCAGCTCACAGACATCAAAGC  
CCAAACGAGTAACCTGAGAGGCAGAGGTACAAAGGCTCACCTTCAACAATTAATAAA  
ATTACACTTGATGAGAAGCTTAATGTTGTCAGAAGTGCTGTAGAAGATCTTAAGAGAAAGTT  
GGAAATTTTACTCTTGGAGAATTATGCTCAGCAGCTCCCACCAGTGCAGCCTCCAGACTCA  
TATCAGGAGCTAAGTGCTGCTCATCATCTCCAGAGTCTGCAGCTGAAAGTCTGAACCAA  
CCATTTCCAGCCAGTTTTCTCAGTGGGCAGATGATGTGACTTTTGACCCACAAGAGTGCA  
CGAGCGCTTGGCGCTCACAGCCCAGAACAGGAGAGTGATGGTTTCCAGCCACCTGACCA  
GTTATGAACAATCACCCAAAAGATTCTGCATCAGTCAAGTGATGTGTTACAGGGCTTCTCT  
ACTGGGTGCCACTACTGGGAAGTAATTACCAAGGATAGTGATGGATGGGCTGTTGGAGTT  
GCTCATGAAATGATTGGTAAAAGGGACAAATTGGGAAGAACTGAGCATTCTGGTGTGTAG  
AATGGCTGGGTGCTAAAAACAGCTGTCAGCATGGCATAAGGATCAAGAAACATTATTACA  
GAAGGATAAACCGCTGAAAGTTGGAGTTTTCTGGAGGTACAAAAGAAGACCGTGTCATTT  
TACTCAATTGCTGGCAAAGAAATGCTTTTGCACACCTTTGAAATCAGTACCTCGAATCCTCT  
CTACCCTGCTTTCTGGCTGTACAGTCTAGAAAGAAATGGATCTTTAACTATAAGTCAGCCAA  
ACAGGAGATAA

>parus\_major-riplet

ATGGCCGCCGTCATCGAGCTCGAGCGGCTGCAGCGCGTCCTGGAGCTGCATTGCTCCTG  
CTGCCTGCAGCTCTTCGCGGAGCCGGTGCGGCTCACGGGCTGCGGCCACAGCTTCTGCC  
GGGGCTGCATCCTCTCTACTGCGCGGGGCGGCCCGCGCCGCTGCCCGCTCTGCCG  
CCGCGCCTTCGAGCTCCGGCACCTGCGGCCCAACCGCGAGCTGGCCGCGCTGCTCAGCC  
TCATCCCGCGGGAGCTGAAGGAAGAATTGGAACACACGATCGCTATGGAGCTGCTGCCT  
GCAACGACCGGAGCTCGGCAGGGCGGGGGCCTGGGGAGAAGGAGGAAGAGATATGGGA  
GAGCTCCAAGCAAGCAGAAGTAAGTGCAGAGACCATCCACCTGTTGAGGAAGATCTCAG

TAAACAAAGGAATATACATCTCAGATCAAAAGCCAGATTATTAAGATTTCTGTTGCATGA  
AGGAATATGTTGAAAGACAGGAGAGAAACACACTGATGGTCATTGAACAAGAGCAAAAAGC  
TGCTCAGCAGAAAATTGAAGAGACTATTTGCCAGCTCACAGACATCAAAGCCCTAACTAGT  
GACTTATCTGAGGGGCAGACATATGAAGGCTTACCTTCAACAATAAATAAAATTACACTTGA  
TGAGAACTTAATGTTGTCAAAAGTGCTGTAGAAGATCTTAAGAGAAAAGTTGGAAATTTTAC  
TCTTGGAGAATTATGCTCAGCAACTCCCAGCAGTGCAGCCTTCAGACTCATACCAGGAGCC  
AAGTGTGAGCTCATCATCTCCAGAGTCTGCAGCTAAAAGTCCTGAACCAACCATTTCCAGC  
CAGTTTTCTCAGTGGGCAGATGATGTGACTTTGGACCCCAAGAGTACACGAGCGCTTG  
GCACTCACAGCCCAGAACAGGAGAGTGATGGTTTCCAGCCACCTGACCACTTATCAACCAT  
CACCCAAGAGATTCTCCATCAGCCAAGTGATGTGTTACAGGGCTTCTCTACTGGGTGCCA  
CTACTGGGAAGTAATTACCAAGGACAGTGATGGATGGGCTGTTGGAGTTGCTCACGAAAT  
GATTGGTAAAAGGGACAAATTGGGAAGAACTGAGCATTCTGGTGCATAGAATGGCTGGG  
TCCTAAAAAACAGCTGTCAGCATGGCATAAGGATCAAGAAACATTATTACACAAGGACAAA  
CCACTGAAGGTTGGAGTTTTCTGGAGCTACAAAAGAAGACTGTCAAAAGTGTAAGACA  
CTGCTACAAAAGTGTCATTTTACTCCATCACTGACAAAGAAACACTTTTGCACACCTTTGAA  
ATTAGTACTTCAAATCCTCTCTACCCTGCTTTCTGGCTGTACACCCTAGAAAGAAATGGATC  
TTTAACTATAAGTCAGCCAAACAGGAGATAA

>passer\_montanus-riplet

ATGGCCGCCGTCTTGGAGCTGGAGGGGCTGGAGCTGCACTGCTCCTGCTGCCTGCAGCT  
CTTCGCGGAGCCCGTGCGGCTCACGGGCTGCGGCCACAGCTTCTGCCGGGGCTGCATCG  
TGCGCTACTGCGGGGGCCGGCCCCGCGCCGCCTGCCCGCTCTGCCGGCGCCCCCTTCGA  
GCTGCAGCACCTGCGGCCCAACCGCGAGCTGGCCGCGCTGCTCAGCCTCATCCCGTGGG  
AGCTGAAGGAGCAGCTGGAAACGCAGGAGGAGCTGAAAGCCTGTGGAGCTGCTGCCTGC  
GACGACCTGAGCTCGGCGGGGGCGGGGACGTGGGGAGAAGGAGGAAGAGATATGGGAGA  
GCTCTAAGCAACAAGAAATAACTGCAGAGACCATCCACCTGTTGAGGAAAGATCTCGATAA  
AACAAAGGAATATACATCTCAGATCAAAAGCCAGATTATTAAGATTTCTGTTGCATGAAGG  
AATATGTTGAAAGACAGGAGAGAAACACACTGATGCTCATTGAACAACAGCAAAAAGCTGC  
TCAACAGAAAATTGAAGAACTATTCACCAGCTCACAGACATCAAAGCCCAAACCTAGAGAC  
TTATGTGAGGGGCAGAGGTGCGAAGGCTCACCTTTGACAATAAATAAAATTACACTTGATG  
AAAAGCTTAATGTTGTCAAAAGTGCTGTAGAAGATCTTAAGAGAAAAGTTGGAAATTTTACTC  
TTGGAGAATTATGCTCAGCAACTCCCACCAGTGATCTTCCAGACTTACACCAGGAGCCAA  
GTGGCAGCTCATCATCTCCAGAGCCTGCAGCTGAAAGTCCTGAACCAAGCATTTTCCAGCC  
AGTTTTCTCAGTGGGCAGATGATGTGACTTTTGACCCCAACAGGGTACACGAGCGCTTGG  
CACTCACAGCCCAGAACAGGAGAGTGATGGTTTCCAGCCACCTCACCCTTACCAGCCAT  
CAGCCAAAAGATTCTGCATCAGCCAAGTCCTGTGTTACAGGGCTTCTCTACTGGGTGCCA  
CTACTGGGAAGTCATTACCAAGGACAGTGATGGATGGGCTGTTGGAGTTGCTCATGAAAC  
GATTGGTAAAAGGAAAAATTGGGAAGAACTGAGCATTCTGGTGTGTGGAATGGCTGGG  
TCCTAGAAAACAGCTGTCAGCATGGCATAAGGATCAAGAAACATTATTGCACAAGGACAAA  
CCACTGAAGGTTGGAGTTTTCTGGAGCTACAAAAGAAGACTGTGTCAATTTTACTCCATCG  
ATGACAAAGAAATGCTTTTGCACACCTTTGAAATCAGTACCTCACATCCTCTCTACCCTGCT  
TTCTGGCTGTACACTCTAGAAAAAAATGGATCTTTAACTATAAGTCAGCCAAACAGGAGATA  
A

>patagioenas\_fasciata-riplet

ATGGCCGCTGCCATCGATCTGGAGCGGCTGCTGGGCGCCCTGGACCTGAGCTGCGCCTG

CTGCCTGCAGTACTTCACGGAGCCCGTGCGGCTCCCGGGCTGCGGGCACAGCTTCTGCC  
GCGGCTGCATCGGCCGGCACTGCAGCGGCCGGCAGCGCGCCGCCTGCCCGCTCTGCCG  
GGAGGGCTTCGAGCTCAAGGACCTGCGGCCCAACCGGGAGCTGGTGGCTTTGGTGAAC  
TAATCCCGCAGGAGGTAAAGGAAAAGGAGTTGAAACACGGGGTGAACGGAAACCCTCCG  
GAGCTGTTGCCTGCAACGACCGGAGTTACCTGGGGAGAAGGAGGAAGGGACATGGGAC  
ATCTCCAAGCAGCCAGAAGTGACTGCAGAGACCATCGAGCTCTTGAGGAAAGATCTCAGT  
GAAGCAAAGGAATATGCGTCTCTGATCAAAAGCCAGATCACTAAAGATTTCTGTTGCATGA  
AGGAATATGTTGAAAGACAGCAGAAAAACACACTGATGTTTCATTGAACAAGAGCAAAAAGC  
AGCTCAACAGAAGATTGAGGGGACTATTGCGCCAGCTCTCTGTTGAAGTGAACAAGCCCACA  
GACCTCAAAGCCCCAAACAAGTAATTTACCTGAGAGACAGAAGTACAAAGGCTCACCTTCAA  
CAACGACTAAAATTACACTTGATGAGAAGCTTAATGCGATCAAAAGTGCTGTAGAAGATCTT  
AAGAGAAAGTTGGAATTTTTACTTGTGGAGAAATATGCTCGGCAGTTCCACCAAGTGCAAC  
TTGCAGATTTCCATCAGGAGACAAGTGTCTGCTCATTATCTCCAGAGGCTGCAGCTGAAAA  
TCCAGAACCAAGGATTTCAAGCCAGTTTTCTCAGTGGGCAGATGATGTGACTTTTGATCTC  
ACAAGAGTATATGAGCGCTTGGCAATCACAGCCCAGAACAGGCGAGTAATGGTTTCCAGC  
CACCCGGGTGATTATGAACCATCACCCAACAGATTCTGCATCAGTCAAGTGATGTGTTTCGC  
AGAGCTTCTCCACTGGGTGCCACTACTGGGAAGTCATTACCAAGGACAGTGATGGATGGG  
CTGTTGGAGTTGCCCATGAAACGATTGGTAAAAAGGACAAATTAGGAAGAACAGAGCATTC  
CTGGTGTGTAGAATGGCTAGGTCCCAAAAAGCAGCTGTCAGCATGGCATAGGAATCAAGA  
AACATTATTACAGAAGGATAAACCATTGAAGGTTGGAGTTTTCTGGAGCTGCAAAAGAAG  
ACCGTGTCGTTTTACTCTATCACTGACAAAGAAATGCTTTTGCATACGTTTGAAATCAATAC  
CTCAAATCCTCTTTACCCTGCTTTCTGGCTATATAGTCTGGAAAGAAATGGATCTTTAACTAT  
ATGTCACGCAACAGGAGGTAA

>pelecanus\_crispus-ripley-partial

GAGGAAGAGATATGGGACATCTCCAAGCAAGTAGAAATGACCATAGAGACCATTACATCT  
TGAGGAAAGACCTCAGTAAAGCAAAGGAATATGCGTCTCAGATCAAAAGCCAGATTACTAA  
AGATTTCTGTTGCATGAAGGAATATGTTGAAAGACAGGAGAGAAACACACTGACATACATT  
GAACAAGAGCAAAAAGCAGCTCAACAGAAAAATGGAAGAGACTATTCACCAGCTCTGTGTTG  
AAGTGAGCGAGCTCACAGACATCAAAGCCCAAACGAGTAACCTACCTGAGAGACATAATTA  
CGAAGGCTCACCTTCAACAATGAATAAAATTACACTCGATGAGAAGCTTGATGTTGTCAAAA  
GTGCTGTAGAAGATCTTAAGAGAAAGTTGGAATTTCTACTTTTGGAGAAGTATGCTCGGCA  
GTTCCCACCAAGTGCAACCTCCAGATTTGTATCAGGAGACAAATGTCTGCTCATTATCTCCA  
GAGCCTGCAGCTAAAAATCCAGAAACAATGATTTCAAGCCGGTTTTCTCAGTGGGCAGAAG  
ATGTGACTTTTGATCTCACACGAGTGTATGAGCGCTTAGCAGTCACAGCCCAGAACAGGAA  
AGTAATGGTTTCCAGCCACCTGACTGGTTATGAACCATCGCCCAAGAGATTCTGCATCAGC  
CAAGTGATGTGTTTCGCAGAGCTTCTCTACCGGGTGCCACTACTGGGAAGTCATTACTGAGC  
ACAGTGATGGATGGGCTGTTGGAGTTGCTCATGAAATGATTGGTAGAAGGCACAAATTAGG  
AAGAACAGAGCATTCTGTTGTGTAGAGTGGCTAGGTGCCAAAAAGCAGCTGTCAGCATG  
GCACAGGGATCAAGAAACATTATTACACAATGATAAACCATTGAAGGTTGGAGTTTTCTG  
GAGCTACAAAAGAAGACCGTGTCATTTTACTCCATCACTGACAAAGAAATGCTTTTGCATAC  
ATTTGAAATCAATACCTCAAATCCTCTTTACCCTGCTTTCTGGCTATATAGTCTAGAAAGAAA  
TGGATCTTTAACTATAAGTCATACGAACAGGAGGTAA

>penelope\_pileata-ripley

ATGGCTGCCACTATCGACCTCAAGCAGCTGCAGGCCGATGTGGACCTGAGCTGCACTTTC

TGCCTGAAGTACTTCACGGACCCCGTGCGGGCTCGCGGGCTGCACCCACAGCTTCTGCCG  
GTCATGCATCACCGAGTACTGCATGGGCAGGCAGCGCGCCAGTGCCCGCTCTGCAGGG  
AGGCCTTCGAGCTGAAGGACCTGCGGCCCAACAGGGAGATGGCTGCTCTGGTGAAC TTAA  
TCCCCGAAGAGGTGAAGGAAAAAGATTTGGAGACCCAGGATGAACCCACATCCTCTGGAG  
GTGGTGCCTGCGGTGGGCAGAGCTCTGAGGAGAAGGAGGAACAGGAAAATAACATCTCC  
AAGCAACTGGAAATGACTGAAGAGGCCATCAGCACGTTGACAAAAGATCTCAGTAAAACAA  
AGGAATATGCATCTCAGATCAGAAGACAGATTACTAAAGATTTCTGTTGCATGAGGGAATAC  
ATTGAAAGACAAGAGAAAAATACACTGATGTTTATTGAACAGGAGGAAAAAGCAGCTCAAC  
AGAAGACTGAAGAGGCTATTGACCAGCTCTGTGTTGACATGAACGAGCTTATAGACCAAAC  
TGAGAAAGGACGGGGAAGCGACAAAACGAAGTGGCAGAATAGTAACCTTGTTGAGAGAGG  
TAGGTCCAAAGGCTCACCTTCAACAGTGAATAAAATTACAGTGGATCAGAAGCTTAATGTTG  
TCAAAAGTGCTGTAGAAGATCTTAAGAGAAAGCTGGAAATTTTACTTTTGGAGAAATACCT  
CAGCAGTTCTGCAAGTACAATGTCCAGACTTATCTCAGGAGACAAGTGCCTGCTCTTTAT  
CTCCAGAATCTGCAGCTGAAAATCCAGAACCAGTGATTTCAAGCCAGTTTTCTCAGTGGAC  
AGATGATGTAAC TTTTCGATCTCACCAGAGTATATGACCGCTTAGCAATCACAGCTCAAAACA  
GGAAAGTAATGGTTTCCAGCTACCCAACTGATTATGAACCATCACCCAAGAGATTCTGCAT  
CAGCCAAGTGATGTGTTCCAGGGCTTCTCTACTGGGTGCCACTACTGGGAAGTAATTACT  
AAGGACAGTGATGGATGGGCTGTTGGAGTTGCTCATGAAATGATTGGTAAGAAGGACAGA  
TTGGGAAGAACAGAGCATTCTGGTGTATAGAATGGGTAGGTTCCAAAAGCAGTTGTTCAG  
CATGGCACAGAAGTGAAGAAACACCATTAAACAGCGATAAACCATTGAATGTTGGAGTTTT  
CCTGGAGCTACAAAAGAAGACTGTGTCATTTTACACCATTGCTGACAAAGAAATGCTTTTGC  
ATACATTTAAAATCAATACCTCAAATCCTCTTTATCCTGCTTTCTGGCTATACAGTCTGGATA  
GAAATGGATCTCTAACTCTAAGTCACACAAGCAGGAGGTAA

>phaethon\_lepturus-riplet

ATGGCTGCTGAGGTCGACCTCGAGCGGCTCCTGGGCGCCGTGGAGCTGAGCTGTACTTG  
CTGCCTGCAGTACTTCACGGACCCTGTGCGGCTGGCGGGCTGCACCCACAGCTTCTGCC  
GGGCCTGCATCGTCCAGTACTGCAAGGGGAGGCAGGCCGCCGGCTGCCCGCTCTGCCG  
GGAGGTCTTCGAGCTGAAGGACCTGCGGCCCAACCGGGAGCTGGCCGCTTTGGTGAAC T  
TAATCCCGCAGGAGGTAAAGCAGCGAGAGTTGGAACACAGCATGAATGGAAACCCGCCG  
GAGCTGTTCCCTGCAACGACTGGAGCTCGGCGGGGCGGCGACCTGGGGAGAAGGAGGA  
AGAGATATGGGACATCTCCAAGCAAGTAGAAATGACTGCAGAGACAATCTGCTTCTTGATG  
AAAGATCTCAGTAAAGCAAAGGAATATGTATCTCAGATCAAAAGACAGATTACTAAAGATTT  
CTGTTGCATGAAGGAGTATGTTGAAAGACAGGAGAGAAACACACTGATGTTTATTGAGCAA  
GAGCAAAAAGCAGCTCAAGAGAAAATTGAAAAGACTATTCATCAGCTCTGTGTTGAAGCAG  
ACAAGCTCACAGACATCAAAGCCCAAACAAGTAACTTACCCAGGGACATAGGTACAAAGG  
CTCGTCTTCAACAATGATTAATAATTACACTTGATGAGAAGCTTAATCATGTCAAAACTGCTG  
TAGAAGATCTTAAGAGAAAGTTGGAATTTCTTCTTCTGGAGAAATACGCTCGGCAGTTCCCA  
CCAGTGCAACCTCCCGACTTACATCAGGAGACAAATGTCTGCTCATTATCTCCAGAGTCTG  
CAGCTAAAAATCCAGAACCAATGATTTCAAGCCAGTTTTCTCAGTGGGCAGATGATGTGAC  
TTTTGATCTCACGAGAGTATATAAGTGCTTAGCAATCACGGCCCAGAACAGGAAGGTAATG  
GTTTCCAGCTACCCGACTGATTATGAACCATTGCCCAACAGATTCTGCATCAGCCAAGTGA  
TGTGTTACAGAGCTTCTCTACTGGGTGCCACTACTGGGAAGTAATTACCAAGGACAGTGA  
TGGATGGGCTGTTGGAGTTGCTCATGAAATGATTGGTAAAAGGGACAAATTAGGAAGAACA  
GAGCATTCCTGGTGTGTAGAATGGCTAGGTCCCAAAAAGCAGCTGTCAGCATGGCATAGA

GATCAAGAAACATTATTACACAACGATAAACCATTGAAGGTTGGAGTTTTCTGGAGCTACA  
AAAGAAGACCGTGTCAATTTTACTCCATCACAGACAGGGAAATGCTTTTGCATACATTTGAAA  
TCAATACCTCATATCCTCTTTACCCTGCTTTCTGGCTATATAGTCTAGAAATAAATGGATCTT  
TAACTATAAGTCACACAAACAGGAAATAA

>phalacrocorax\_pelagicus-riplet

ATGGCCGCTGCGGTGGGCCTCGACCGGCTCCTGCGCGCCGTGGACCTGAGCTGCGCCT  
GCTGCCTGCAGCTCTTCACGGACCCCGTGCGGCTGCCGGCCTGCAGCCACAGCTTCTGC  
CGGCCCTGCATCGAGGAGTACCGCAGGGGGAGGCAGCGGGGCGGCTGCCCGCTCTGCC  
GGGAAGGCTTCGAGCTCAAGGACCTGCGGCCCAACCGGGAGCTGGCCGCTTTGGTGAGC  
TTGATCTCGCAGGAGGAAGCGGGAGAGTTGGAAACGCGGGACGAACCGAAACCCTCAGG  
AGCTGTTGCCTGCGACAACCCAGCCCGGCAGAGCGGCGACCTCGGGAGAAGGAGGAAG  
AGATATGGGACCTCTCCAAGCAACTAGAAATGACTGCAGAGACCATCCAACCTCTTGAAGGA  
AGATCTTGCTAAAGCAAAGGAATATGCATCTCAGATCAAAAGCCAGATTACTGAAGATTTCT  
GTTGCATGAAGGAATATGTTGAAAGACAGGAGAGAAACACACTGATGTTTATTGAACAAGA  
GGAAAAAGCAGCTCAACAGAAAAATTGAAGAGACTATTCACCAGCTCTGTGTTGAAGCGTAC  
GAGCTCACAGACATCAAAGACCAAACAAGTAACTTACTCAAGAGACATAGGTACCCAGGCT  
CACCTTCAACAATGCATAAAATTACACTTGATGAGAAGCTTAATGTCGTCAAAAGTGCTGTA  
GAAGATCTTAAGAGAAAGATGGAAATTTTACTCTTGAGAGAAGTTTACTTGGCAGTTCCCACC  
GGTGCAACCTCCAGACTTACATCCAGAGGCAAATGTCTGCTCGTTATCTCCAGAGCCTGCA  
GCTACAAATCCTGAACCAATGATTTCAAGCCAGTTTTCTCAGTGGGCAGATGATGTGACTTT  
TGATCTCACAAGAATATATAAGTGGTTAGCAGTCACAGCCCAGAACAGGAAAGTGATGGTT  
TCCAGCTACCTCACTGATTATGAACCATCGCCTAACAGATTCTGCATCAGTCAAGTGATGT  
GTTACAGAGCTTCTCTACTGGGTGCCACTACTGGGAAGTAATTACCAGGGACAGTGATG  
GATGGGCTGTTGGAGTTGCTCATGAAATGATTGGTAAAAGGGACAAATTAGGAAGAACAGA  
GCATTCCTGGTGCATAGAATGGCTTGGTCCTGAAAAGCGGCTGTCAGCATGGCATGGGGG  
TCAAGAAACATTATTACACAAGGAAAAACCATTGAAGGTTGGAGTTTTCTGGAGCTACAAA  
AGAAGATGGTGTCAATTTTACTCCATTGCTGACACAGAAATACTTTTGCATACATTTGAAATC  
AATACCTCAAATCCTCTTTACCCTGCTTTCTGGCTGTGTAGTCTAGAAAGAAATGGATCTTT  
AACTATAAATCACACAAACAGGAGATAA

>phoebastria\_albatrus-riplet

ATGGCTGCTGCTGTGGACCTCGAGCGGCTCCTGGGCGCCGTGGACCTGCGCTGCGCTTG  
CTGCTTGCAGTACTTCACGGACCCCGTGCGGCTCACGGGCTGCAGCCACAGCTTCTGCCG  
GCCCTGCATCATCGAGTACTGCAAGGGGAGGCAGCGCACTCCCTGCCCGTTCTGCCGGG  
AGGTCTTCGAGCTGAAGGACCTGCGGCCCAACCGGGAGCTGGCCGCTTTGGTGAATCTC  
CTGCAGGAGGTGAAGGAAGAAGAGTTGGAACACAGGATGAACTGAAACCCTCCGGAGCT  
GTTGCCAGCAACGACCGGAGCTCGGCGGGGCGGCGACCTGGGGAGAAGGAGGAAGAGA  
TATGGGACCTCTCCAAGCAACTAGAAATGACTGCAGAGACCATCCAACCTCTTGAGGAAAGA  
TCTCAGTAAAGCAGAGGAATATGCATCTCAGATCAAAAGCCAGATTACTAAAGATTTCTGTT  
GCATGAAGGAATATGTTGAAAGGCAGGAGAGAAACACACTGATGTTTATTGAACAAGAGCA  
AAAAGCAGCTCAACAGAAAAATCGAAGAGACTATTCACCAGCTCTGTGTTGAAGTGAACAAG  
CTCATAGACATCAACACCCAAACCAGTAACTTACCTGAGAGGCATAGGTACAAAGGCTCAC  
CTTCAACAATGAATAAAATTACACTCGATGAGAAGCTTAATGTTGTGAAAAGTGCTGTAGAA  
GATCTTAAGAGAAAGTTGGAAATTTTACTTTTGGAGAAGTACACTCAGCAGTTCCCACCACT  
GCAACCTCCAGACTTAAATCAGGAGACAAATGTCTGCTCACTATCTCCAGAGTCTGCAGCT



AAAAATCCAGAACCAATGACTTCAAGCCAGTTTTCTCAGTGGGCAGATGATGTGACTTTTGA  
TCTCACAAGAGTATATGACCGCTTAGCAATCACAGCCCAGAACAGGAAAGTAATGGTTTCC  
AGCTACCCGACTGATTATGAACCATCGCCCAACAGATTCTGCGTCAGTCAAGTGATGTGTT  
TGCAGAGCTTCTCTACTGGGTGCCACTACTGGGAAGTAATTACCAAGGACAGTGATGGATG  
GGCTGTTGGAGTTGCTCATGAAATGATTGGTAAAAGGGACAAATTGGGAAGAACAGAGCAT  
TCCTGGTGTGTAGAATGGCTAGGTCCCAAAAAGCAGCTGTCAGCATGGCATAGGGATCAA  
GAAACATTATTACGCAAGGATAAACCATTGAAGGTTGGAGTTTTCTGGAGCTACAAAAGA  
AGATGGTGTGATTTTTACTCCATCACTGACAAAGAAACGCTTTTGCATACATTTGAAATCAAT  
ACCTCAAATCCTCTTTACCCTGCTTTCTGGCTATATAGTCTAGAAAGAAATGGATCTTTAACT  
ATAAATCACACAAACAGGAGATAA

>phoenicopterus\_ruber-riplet

ATGGCTGCCGCTGTGACCTCGAGCGGCTGCTGGGCGCCGTGGACCTGAGCTGCACTTG  
CTGCCTGCAGTACTTCACGGACCCCGTGCGGCTCACGGGCTGCACCCACAGCTTCTGCC  
GGCCCTGCATCATCGCGTACTGCAAGGGGAGGCAGCGCGCCGGCTGCCCGCTCTGCCG  
GGAAGGATTCGAGCTGAAGGACCTGCGGCCCAACCGGGAGCTGGCCGCTTTGGTGAAGT  
TAATCCCGCAGGAGGTCAAGGAAGAAGGGTTGGAAGCACAGGATGAACCGAAACTCTCCG  
GAGCTGTTGCCTGCAACGACCAGACCCAGCGGGGCGGCGACCAGAGGAGAAGGAGGA  
AGAGATCTGGGACATCACCAAGCACCTCGAAAGGACGGCAGAGGCCATCCACCTCTTGAG  
GAAAGATCTCAGTAAAGCAAAGGAATATGCATCTCAGATCAAGAGCCAGATTACTAAAGATT  
TCTGTTGCATGAAGGAATATGTTGAGAGACAGGAGAGAAACACACTGGTGTTCATTGAACA  
AGAGCAAAAAGCCGCTCAACAGAAAATTGAAGAGACTATTCACCAGCTCTGTGTTGAAATG  
AACAAGCTCAGAGACATCAAAGCCCAAACGAGTAACTTACCTGAGAATTATAGGTACAAAG  
GCTTGCCCTTCAACAATGAATAAAATTACACTTGATGAGAAGCTTAATGTTGTCAAAGTGCT  
GTAGAAGATCTTAAGAGAAAGTTGAAATTTTACTTTTGGAGAAATATGCTCGGCAGTTCCC  
ACCAGTGCAACCTCCAGACTTACATCAGGAGACAAACGTCTGCTCATTATCCCCAGAGTCT  
GCAGCTAAAAATCCAGAAGCAATGATTTTCAAGGCCAGTTTTCTCAGTGGGCAGACGATGTGA  
CTTTTGATCTCACAAGAGTATATGAGCGCTTAGCAATCACAGCCCAGAACAGGAAAGTAAT  
GGTTTCCAGCTACCCGACTGATTATCAACCATCGCCCAACAGATTCTGCATCAGCCAGGTG  
ATGTGTTTACAGAGCTTCTCTACTGGGTGCCACTACTGGGAAGTAATTACCAAGGACAGTG  
ATGGATGGGCTGTTGGAGTCGCTCATGAAATGATTGGTAAAAGGGACAAATTAGGAAGAAC  
GGAGCATTCTGGTGTGTAGAATGGCTAGGTCCCAAAGAGCAGCTGTCAGCATGGCATAG  
GAATCAAGAAACATTATTACACAAGGATAAACCATTGAAGGTTGGAGTTTTCTGGAGCTAC  
AAAAGAAGACTGTGTCATTTTACTCCATCACTGACAAAGAAATGCTTTTGCATACATTTGAA  
GTCAGTACCTCAAGCCCTCTTTACCCTGCTTTCTGGCTATATAGTCTAGAAAGAAATGGATG  
TCTAACTATAAGTCACACAAACAGGAGGTAA

>pipra\_filicauda-riplet

ATGGCCGCTGCCATCGAGCTGGAGCGGCTCCTGGCCGCCGTGGAGCTGAGGTGCTCCTT  
GTGCCTGCAGTTCTTCTCGGAGCCGGTGCGGATCGCGGGCTGCAGCCACAGCTTCTGCC  
GGCGCTGCATCAGCCGGTACCGCGCGGGGCCGGCCCGGGCTGCCCGCTCTGCAG  
GGAGGGCTTCGAGCTCCGCGACCTGCGGCCCAACCGCGAGCTGGCCGCGCTGCTCAGC  
CTCATCCCGCCAGAGCTGAGCGAGGAGAAGCTGGAACCCGAGGATGAACTCTCTGGAGC  
TGTTGTCTTCGGCGACCGGAGCTCGGCGGGGCGGCGACCTGGGGAGAAGGAGGAAGAG  
ATATGGGAAAGCTCCAAGCAACCAGAAATATCTGCGGAGACCATCCCCCTGTTGAGGAGA  
GATCTCAGTAAAACCAAGGAATACACATCTCAGATCAAAGCCAGATTACTCGAGATTTCTG

TTGCATGAAGGAATATGTTGAAAGACAAGAGAGAAACACATTGATGTTTCATTGAACAAGAG  
CAAAAAGCTGCTCAACAGAAGATTGAAGAGACTATTCACCAGCTCGCAGACAGCAAAGCCC  
AAACTAGTAACTTACTTTATGAAGGCTCACTTTCAATAATGAATAAAATTACACTTGATGAGA  
AGCTTAGTGTTGTCAAAAGTGCTGTAGAAGATCTTAAGAGAAAAGTTGGAAATGTTACTTTTTG  
GAGAAATACCCTCAGCAATTCCCACCAGTGCAACCTCCAACTCGTATCAGGAGACAAGTG  
TCTGCTCATCACCCCCAGAGTCTGCAGCTGAGATTCCAGACCCGGTGATTCCAAGCCAGTT  
TTCTCAGTGGGCAGAGGACGTGACTTTTGACCACACGAGAGCAAACGAGCGCTTGGCCCT  
CACAGCCCAGAACAGCCGAGTGGTGGTTTCCAGCCACCCACCTGGTATGAACCAGCTCC  
CAGGAGATTCTGCATCAGCCAAGTGATGTGTTCCAGAGCTTCTCCACGGGGTGCCACTA  
CTGGGAGGTGATTACCAAGGACAGTGATGGATGGGCTGTTGGAGTCGCTCATGAAATGAT  
TGGGAAGAGGGACAAATTGGGAAGAACAGAGCATTCTGGTGCGTGGAATGGCTGGGTTT  
CAAAAAGCAGCTGTCAGCCTGGCACAAGGATCAAGAAACATTGTTACACAAGGATAAACCG  
CTGAGGGTTGGGGTTTTCTGGAGCTGCAAAGCAGACAGTGTCCTTTTACTCCATCACTG  
ACAGGGAAATGCTCTTGACACCTTTGAACTCAGCACCTCCCATCCTCTCTATCCTGCCTT  
CTGGCTGTACAGCCTGGAAAGAAATGGATCTTTAACTCTAAGCCACCCAAACAGGAGATAA

>podiceps\_cristatus-riplet

GAGGAAGAGAGATGGGACATCTCCAAGCAACTAGAAATGACTGCAGAGACCCTCCAGCTC  
TTGACGAAAGATCTCAGTAAAGCAAAGGAATATGCGTCTCAGATCAAGAGCCAGATTACTA  
AAGATTTCTGTTGCATGAAGGAGTATGTTGAACGACAGGAGAGAAACACACTGATGTTTCAT  
TGAACAAGAGCAAAAAGCAGCTCAACAGAAAATCGAAGAGGCTATTCACCAGCTCTGTATT  
GAAGTGAACAAGCTCAGAGACATCAAAGCCCCAAACGAGTAACTTACCTGAGAATCATAGAT  
ACAAATACTCACCTTCAGCAATGAGTAAATTACACTCAATGAGAAGCTTGATGTTGTCAAA  
AGTGCTGTAGAAGATCTTAAGAGAAAGTTGGAAATTTTACTTTTGGAGAAATACGCTTGGCA  
GTTCCCAACAGTGCAATCTCCAGACTTATATCAGGAGACGAATGACTGCTCATTATCCCCA  
GAGTCTGCAGCTAAAAATCCAGAACCAGTGATTTTCAGGCCAGCTTTCTCAGTGGGCAGATG  
ATGTGACTTTTCGATCTCACAAGAGTATATGAGCGCTTAGCAATCACAGCCCAGAACAGGAA  
AGTAATGGTTTCCAGCTACCCAACGGGTTATAAACCATCACCCAACAGATTCTGCATCAGC  
CAAGTGATGTGTTACAGAGCTTCTCTACTGGATGCCACTACTGGGAAGTAATTACCAAGG  
ACAGTGATGGATGGGCTGTTGGAGTCGCTCATGAAATGATTGGTAAAAGGGACAAATTAGG  
AAGAACAGAGCATTCTGGTGCGTAGAATGGCTAGGTTCCAAGAAGCAGCTGTCAGCATG  
GCATAGGGATCAAGAAACATTATTACACAAGGATAAACCAATTGAAGGTTGGAGTTTTCTG  
GAGCTACAAAAGAAGACCGTGTCATTTTACTCCATCACTGACAAAGAAATGCTTTTTGCATAC  
ATTTGAAGTCAATATCTCAAACCTCTTTACCCTGCTTTCTGGCTATATAGTCTAGAAAGAAA  
TGGATGCCTAATTATAAGTGACACAAACAGGAGATAA

>poecile\_atricapillus-riplet

ATGGCCGCCGTCATCGAGCTCGAGCGGCTGCAGCGCGTCCTGGAGCTGCATTGCTCCTG  
CTGCCTGCAGCTCTTCGCGGAGCCGGTGCAGCTCACGGGCTGCGGCCACAGCTTCTGCC  
GGGGCTGCATCCTCCGCTACTGCGCGGGGCGGCCCGCGCCGCTGCCCGCTCTGCCG  
CCGCGCCTTCGAGCTCCGGCACCTGCGGCCCAACCGCGAGCTGGCCGCGCTGCTCAGCC  
TCATCGCGCGGGAGCTGAAGGAACAATTGGAACACAGGACGACCCGGATCCCTATGGAG  
CTGCTGCCTGCAACGACCGGAGCTCGGCGGCGCGGAGACCTGGGGAGAAGGAGGAAGA  
GATATGGGAGAGCTCCAAGCAACAAGAAATAACTGCAGAGACCATCCACCTGTTGAGGAA  
AGATCTCAGTAAACAAAGGAATATACATCTCAGATCAAAAGCCAGATTACTAAAGATTTCT  
GTTGCATGAAGGAATATGTTGAAAGACAGGAGAGAAACACACTGATGGTCATTGAACAAGA

GCAAAAAGCTGCTCAACAGAAAATTGAAGAGACTATTCGCCAGCTTACAGACATCAAAGCC  
CTAACTAGTGACTTATCTGAGAGGAAGACATATGAAGGCTCACCTTCAACAATAAATAAAAT  
CACACTTGATGAGAACTTAATGTTGTCAAAAAGTGCTGTAGAAGATCTTAAGAGAAAAGTTGG  
AAATTTTACTTTTGGAGAATTATGCTCAGCAACTCCCAGCAGTGCAGCCTTCAGACTCATAC  
CAGGAGCCAGGTGTCAGCTCATCATCTCCAGAGTCTGCAGCTAAAAGTCCTGAACCAACC  
ATTTCCAGCCAGTTTTCTCAGTGGGCAGATGATGTGACTTTGGACCCCAAGAGTACATG  
AGCGCTTGGCACTCACAGCCCAGAACAGGAGAGTGATGGTTTCCAGCCACCTGACCACTT  
ATCAACCATCACCCAAGAGATTCTCCATCAGCCAGGTGATGTGTTTACAGGGCTTCTCTAC  
TGGGTGCCACTACTGGGAAGTAATTACCAAGGACAGTGATGGATGGGCTGTTGGAGTTGC  
TCATGAAATGATTGGTAAAAGGGACAAATTGGGAAGAACTGAGCATTCTGGTGTGTAGAA  
TGGCTGGGTCCTAAAAACAGCTGTCAGCATGGCATAAGGATCAAGAAACATTATTACACA  
AGGACAAACCACTGAAGGTTGGAGTTTTCTGGAGCTACAAAAGAAGACAGTGTCATTTTA  
CTCCATCACTGACAAAGAAACACTTTTGCACACCTTTGAAATTAGTACCTCAAATCCTCTCT  
ACCTGCTTTCTGGCTGTACACTCTAGAAAGAAATGGATCTTTAACTATAAGTCAGCCAAAC  
AGGAGATAA

>pseudopodoces\_humilis-riplet

ATGGCCGCCGTATCGAGCTCGAGCGGCTGCAGCGCGTCCTGGAGCTGCATTGCTCCTG  
CTGCCTGCAGCTCTTCGCGGAGCCGGTGCGGCTCATGGGCTGCGGCCACAGCTTCTGCC  
GGGGCTGCATCCTCCGCTACTGCGCGGGGCGGCCCGCGCCGCTGCCCGCTCTGCCG  
CCGCGCCTTCGAGCTGCGGCACCTGCGGCCCAACCGCGAGCTGGCCGCGCTGCTCAGC  
CTCATCCCGCGGGAGCTGAAGGAAGAATTGGAAACACAGGACAACCCGGATCCCTATGGA  
GCTGCTGCCTGCAACGACCGGAGCTCGGCAGGGCGGGGACCTGGGGAGAAGGAGGAAG  
AGATATGGGAGAGCTCCAAGCAACCAGAAATAACTGCAGAGACCATCCACCTGTTGAGGA  
AAGATCTCAGTAAAACAAAGGAATATACATCTCAGATCAAAAGCCAGATTATTAAGATTTC  
TGTTGCATGAAGGAATATGTTGAAAGACAGGAAAGAAACACACTGATGGTCATTGAACAAG  
AGCAAAAAGCTGCTCAGCAGAAAATTGAAGAGACTATTTGCCAGCTCACAGACATCAAAGA  
CCTAACTAGTGACTTGTCTGAGAGGAAGACATATGAAGGCTCACCTTCAACAATAAATAAAA  
TTACACTTGATGAGAACTTAATGTTATCAAAAGTGCTGTAGAAGATCTTAAGAGAAAAGTTG  
GAAATTTTACTCTTGGAGAATTGTGCTCAGCAACTCCCAGCAGTGCAGCCTTCAGACTCAT  
ACCAGGAGCCAAGTGTCAGCTCATCATCTCCAGAGTCTGCAGCTAAAAGTCCTGAACCAAC  
CATTTCCAGCCAGTTTTCTCAGTGGGCAGATGATGTGACTTTGGACCCCAAGAGTACAC  
GAGCGCTTGGCACTCACAGCCCAGAACAGGAGAGTGATGGTTTCCAGCCACCTGACCACT  
TATCAACCATCACCCAAGAGATTCTCCATCAGCCAAGTGATGTGTTTACAGGGCTTCTCTA  
CTGGGTGCCACTACTGGGAAGTAATTACCAAGGACAGTGATGGATGGGCTGTTGGAGTTG  
CTCACGAAATGATTGGTAAAAGGGACAAATTGGGAAGAACTGAGCATTCTGGTGCGTAGA  
ATGGCTGGGTCCTAAAAACAGCTGTCAGCATGGCATAAGGATCAAGAAACATTATTACAC  
AAGGACAAACCACTGAAGGTTGGAGTTTTCTGGAGCTACAAAAGAAGACCGTGTCATTTT  
ACTCCATCACTGACAAAGAAACACTTTTGCACACCTTTGAAATTAGTACTTCAAATCCTCTCT  
ACCTGCTTTCTGGCTGTACACCCTAGAAAGAAATGGATCTTTAACTATAAGTCAGCCAAAC  
AGGAGATAA

>psittacula\_krameri-riplet

ATGGCTGCCGCGGTGCCCTGGGGCGGCTGCTGCGCGCGGTGGAGCTGAGCTGCGCCT  
GCTGCCTGCAGCACTTCGCGGACCCGGTGCGGCTCCCGGGCTGCGGCCACAGCTTCTGC  
CGGCCCTGCGTCCTCCAGTACTGCAAGGGGAAGCAGCGCGCCGCTGCCCGCTCTGCCG

GGAGGGCTTCGAGCTGAAGGACCTGCGGCCCAACCGGGAGCTGGCCGCTTTGGTGAACC  
TGGTCCGGCAAGAGGTAAAGGAAGAAGAGTTGGAAGCACAGGATGAACCGAAGCCCTCG  
GCAGCTGTTGCCTGCAACGACCAGAGCTCGGCGGGACGGCAACATGGGGACAAGGAGGA  
AGAGATACAGGACATCTCGAAGGAACTGGAAGTGAATATAGAGACCATCCACCTCTTGAGA  
GAAGAGCTCAGTAAAACAAAGGAATATACATCTCAGATCAAAAGCCAGATTACGAGAAATTT  
CAGTTGCATGAAGGAATATGTTGAAAGACAGGAGAGACACACACTGGTATTCATTGAACAA  
GAGCAAAAAGCAGCTGAACAGAAAATTGAAGAGACTATTCACGAGCTCTGCATTGAAGTGA  
ACAGGCTCACAGACATCACAGCTGAAACAAGTACCCTACCTGAGAGACATAGGTACGGAG  
ACTTGCTCTCAATAATGAATAAAATTACACTTGATGAGAACTGAATGCTGTCAAAAGTGCT  
GTAGAAGTTCTTAAGAGAAAGTTGGAATTTTGCTTTTGAGAAATACCCTGAGCAGTTCCC  
ACAGTGCAACCACCAGACTTGTATCAAGAGACAAGTGCCTGCTCCTTATCTCCAGAGCCT  
GCAGCTAAAAGTCCAGAACCAGTGAATTCAAGCCGTTTTTCCCAGTGGGCAGATGATGTGA  
CTTTTGATCTCAGAAGAGTCTATGAGCGCTTAGCAATCACAGCCCAGAACAGAAAAGTCAT  
GGTTTCCAGCCACCCAGCTGACTATGGACCATCGCCCAATAGATTCTGCATCAGCCAAGTG  
ATGTGTTCAAAAGCTTCTCTACAGGGTGCCACTACTGGGAAGTAATTACCAAGGACAGTG  
ATGGATGGGCTGTTGGAGTTGCTCATAAAATGATTGGTAAAAGGGAAAAATTAGGCAGAAC  
GGAGCATTCTGGTGTGTGGAATGGCTAGGTCCCAGAAAGCAGCTGTCAGCATGGCACAG  
GAATCAAGAAACGTTATTACACAAGGATAAACCACTGAAGGTTGGAGTTTTTCTGGAGCTA  
CAGAAGAAGACCGTGTCATTTTATTCCATCACTGACAAAGAAATGCTTTTGCATACTTTTGA  
AATCGGTACCTCAGATCCTCTTTACCCTGCTTTCTGGCTATATGGCCTAGAAATAAATGGAT  
CTTTAACTATAAGTCATGCAAACAGGACATAA

>psittacus\_erithacus-riplet

ATGGCTGCCGCGGTGCCTCTGGGGCGGCTGCTGCGGGCGGTGGAGCTGAGCTGCGCCT  
GCTGCCTGCAGCACTTCTTAGACCCGGTGCGGCTCCTGGGCTGCGGCCATAGCTTCTGCC  
GGCCCTGCATCCTCCAGTACTGCAAGGGGAAGCAGCGCGCCGCTGCCGCTCTGCCGT  
GAAAACCTTCGAGCTGAAGGACTTGCGGCCCAACCGGGAGCTGGCCGCTTTGGTGAACCTG  
GTCGAACAAGAAATAAGGGAAGAAGAGTTGGAAGTACAGAATGAACCGAAGCCCCCTGCA  
GCTGTTGCCTGCAACGACCAGAGCTCGGCGGGACGGCGACATGGGGACGAGGAGGAAG  
AGATACAGGACATCTCGAAGGAACTGGAAGTGAATATAGAGACCATCCACCTCTTGAGAGA  
AGAGCTCAGTAAAACAAAGGAATATACGTCTCAGATCAAAAGCCAGGTTACGAGAGATTTT  
AGCTGCATGAAGGAATATGTTGAAAGACAGGAGCGACACACATTGGTGTTCATTGAACAAG  
AGCAAAAAGCAGCTGAGCAGAAAATTGAAGAGACTATTGAGCAGCTCTGCATTGAAGTGAA  
CAGGCTCACGGACATCACAGCTGAAACAAGCACCCCTAACTGAGAGACATAGGTACAGAGA  
CTTGCCCTCAATAATGGATAAAATTAAACCTGGTGAGAACTTAATGTTGTCAAAAGTGCTG  
TACAAGTTCTTAAGAGAAAGTTGGAATCTTGCTTTTGAGAGAAATACCCCGAGCAGTTCTCA  
CCAGTGCAACCACCAGACTTGTATCAAGAGGCAAGTGCCTGCTCCTTATCTCCAGAGTCTG  
CAGCTAAAAGTCTAGAACCAGTGATTCAAGCCGGTTTTTCCCAGTGGGCAGATGATGTGAC  
TTTTGATCTCAGAAGAGTCTATGAGCGCTTAGCAATCACAGCCCAGAACAGGAAAGTCATG  
GTTTGTAGCCACCCAAGTACTATGGACCATCGCCCAATAGATTCTGCATCAGCCAAGTGA  
TGTGTTACAGAGCTTCTCTACTGGGTGCCACTACTGGGAAGTAATTACCAAGGACAGTGA  
TGGATGGGCTGTTGGAGTTGCTCATAAAATGATTGGTAAAAGGGAAAAATTAGGAAGAACG  
GAGCATTCTTGGTGTGTGGAATGGCTAGGTCCCAGAAAACAGCTGTCAGCATGGCACAGG  
AATCAAGAAACGTTATTAGACAAAGATAAACCACTGAAGGTTGGAGTCTTCTGGAGCTAC  
AGAAGAAGACTGTGTCATTTTACGCCATCACTGACAAAGAAATGCTTTTGCATACTTTTGAA

ATCAGTACCTCAAATCCTCTTTACCCTGCTTTCTGGCTATATGGCCTAGAAATAAATGGATC  
TTTAACTATAAGTCACACAAAAGGGACATAA

>pyrrhura\_perlata-riplet

ATGGCTGCCGCGGTGCCTCTGGGGCGGCTGCTGGGCGCGGTGGAGCTGAGCTGCGCCT  
GCTGCCTGCTGCACTTCGTGGACCCGGTGCGGCTTCCTGGCTGCGGCCACAGCTTCTGC  
CGGCCCTGCATCCTCCAGTACGGTGAGGGGAAGCAGCGCGCCACCTGCCCCGCTCTGCCG  
GGAGGGCTTCGAGCTGAAGGACGTGCGGCCCAACCGGGAGCTGGCCGCTTTGGTGAACC  
TCGTCCGGCAAGAGGTAAAGGAAGAAGAGTTGGAAGCACAGAATGAACCGAAGCCCCCTG  
CGGCTGCTGCCTGCAACGATGAGAGCTCGGCGGGATGGCGACTTGGGGACGAGGAGGAA  
GAGATACAGGACATCTCAAAGGAACTGGAAGTGAATAGAGACCATCCACCTCTTGAGAG  
AAGAGCTCAGTAAACAAAGGAGTACACATCTCAGATCAAAAGCCAGATTACAAGAGATTT  
CAGTTGCATGAAGGAATATGTTGAAAGACAGGAGAGACACACACTGGTGTTCATTGACCAA  
GAGCAAAAAGCAGCTGAACAGAAAATTGAAGAGACTATTCAGCAGCTCTGCATTGAAGTGA  
ACAGGCTCACAGACATCACAGCCGAAACAAGCACCCCTAACTGAGAGACATAGATACAGAG  
ACTTGCCCTCAATAATGGATAAAATTGCACTTGATAAGAAACATAATGTTGTCAAAAGTGCT  
GTACAAGTTCTTAAGAGAAAGTTGGAAATTTTGCTTTTGGAGAAATACCCTGAGCAGTTCCC  
ACCAGTGCAACCACCAGACTTGTATCAAGAGACAAGTGCCCTGCTCCTTATCTCCAGAGTCT  
GCAGCTAAAAGTCCAGAACCAGTGAATTCAAGCCGTTTTTCCAGTGGGCAGATGATGTGA  
CTTTTGATCTCAGAAGAGTCTATGAGCGCTTAGCAATAACAGCCCAGAACAGGAAAGTCAT  
GGTTTCCAGCCACCCAAGTACTATGGACCATCGCCCAATAGATTCTGCATCAGCCAAGTG  
ATGTGTTACAGAGCTTCTCTACTGGGTGCCACTACTGGGAAGTAATTACCAAGGACAGTG  
ATGGATGGGCTGTTGGAGTTGCTCATAAATGATTGGTAAAAGGGAAAAAATAGGAAGAAC  
GGAGCATTCTGGTGTGTGGAATGGCTAGGTCCCAGAAAGCAGCTGTCAGCATGGCATAG  
GAATCAAGAAACGTTATTAGACAAAGATAAACCCTGAGGGTTGGAGTTTTCTGGAGCTA  
CAGAAGAAGACCGTGTCATTTTACTCCATCACTGACAAAGAAATGCTTTTGCATACTTTTGA  
AATCAGTACCTCAAATCCTCTTTACCCTGCTTTCTGGCTGTATGGCCTAGAAATAAATGGAT  
CTTTAACTATAAGTCACACAAATGGGATGTAA

>recurvirostra\_avosetta-riplet

ATGGCTGCTGCTGTGACCTGGAGCGGCTCCTGAGCGCCGTGGAGCTGAGCTGCACTTG  
CTGCCTGCAGTACTTCAGGGACCCGGTGCGGCTCACCGGCTGCACCCACAGCTTCTGCC  
GGCCCTGCATCGTCCGGTACTGCGAGGGGAGGCAGCGCGCCGGCTGCCCGCTCTGCCG  
GGAAGGCTTCGAGCTGAAGGACCTGCGGCCCAACCGGGAGCTGGCCGCTTTGGTGAAGT  
TAATCCCGCAGGAGGCGAAGGAGGAAGAGTTGGACACAGAGGATGAACCGAAACCCTCC  
GGAGCTGTTCCCTACAGCGGCGGGAGCTCGGCGGGGCGGCGACCTGCGGAGAAGGAGG  
AAGAGATATGGGACGTCTCCAAGCAACTAGAAATGACTACAGAGACCATCCACCTCCTGAG  
GAAGGATCTGAGTAAAGCAAAGGAATATGCATCTCAGATCAAAAGCCAGATTACTGAAGAT  
TTCTGTTGCATAAAGGAATATGTTGAAAGACAGGAGAGAAACACACTGATGTTTCATTGAACA  
AGAGCAAAAAGGCAGCTCAAAAGAAAATGGAAGAGACTATTCACCAGCTCTGTGGCGAAGT  
GAACGAGCTCACAGACACCAAAGCCCAAACGAGTAACTCACCTGAGAGACAGAGGTACAA  
AGGCTCACCTTCAACAATGACTAAGATTACACTTGATGAGAAGCTTAATGGTGTCAAAGCT  
GCTGTGGAAGATCTTAAGAGAAAGTTGGAAATCTTACTTTTTGAGAAGTACGCTCGGCAGT  
TCCCACCAGTGAAACCTCCAGACTTATACCAGGAGACAAGTGTCTGCTCATTATGTCCAGA  
GTCTGCAGCTAAAAATCCAGAACCAATGATTTCAAGCCAGTTTTTCACAGTGGGCAGCTGAT  
GTGACTTTTGATGTCAAGAGTATATGAGCGCTTAGCAATCACAGCCCAGAAAGAGGACAG

TAATGGTTTTCCAGCTCCCCGACTGATTATGCACCATCGCCCAACAGATTCTGCATCAGCCA  
AGTGATGTGTTCCAGAGCTTCTCTGCTGGGTGCCACTACTGGGAAGTAATTACCAAGGAC  
AGTGATGGATGGGCTGTTGGAGTTGTTTCATGAAATGATCGGTAAAAGGGACAAATTAGGAA  
GAACGGAGCATTCTGGTGTGTAGAATGGCTAGGTCCCAAAAAACAGCTGTCAGCATGGC  
ATAGAGATCAAGAAACATTACTACACAAGGAGAAACCATTGAAGGTTGGAGTTTTGCTGGA  
GCTACAAAAGAAGACCGTGTCTTTTATTCCATCACTGACAAAGAAATCTTTTGCATACAT  
TTGAAATCAACACCTCAAATCCTCTTTACCCTGCTTTCTGGCTGTATAGTCTAGAAAGAAAT  
GGATCTTTAACTATAAGTCACACAAACAGAGGATAA

>rhea\_americana-riplet

ATGGCGGCCTCTGTGGATCTCCAGCAGCTCCAGGCCGACCTGGACCTGAAGTGCTCCTTC  
TGCTTGCGTACTTCTCCGACCCTGTGCGGCTCACGATCTGCAGCCACAACCTTCTGCCGG  
TCCTGCATCACCGCCTACTTCAAGACGAAGCGGGGTGCCAGCTGCCCCTGTGCCGCAA  
GGGCTTCGAGCTGAAGGACTTGTGGCCCAACCGGGAGCTAGCCGTTCTGGTGAACCTTGAT  
CTCCAGGGAGGAAAAGGAGAAAGAGTTGGAGAGACAGGAGGAGCTGGAACCTGAACAGAG  
CCAGCGACAGCCAGAGCTCAGCGAGACGGAGAGATGTGGAAAAGGAGGAAGAGATAAAT  
GAGATCTCCAAGCAACTGGAATGACTGAACAGACCATCCACCTCTTGAGGAAGGATCTGA  
CTAAAACAAAGGAATATACATCTCAGATCAAAAGTCGGATTACTAAAGATTTCTGTTGCATG  
AAGGAATACGTTGAAAGACAGGAGAGAAACACACTGATGTTTCATTGAAAAACAGCAACAAG  
CAACTCAACAGAAAATTGAAGAGGTTATTGACCAGCTCTGTGCTGAAGTGAACAAGCTCAC  
AGACATCAAAGCCCCAAATGGAGAAAGGACTGGTAAGTGATGAAATGAAGTGGCTGAATGAT  
AACTTACCTGAGAGAGATGGGTACAAAGGCTCACCTTTAACAATGGATAAAATTACACTTGA  
TGAGGAAAAGATTGATGTTGTCACAAGTGCTGTAGAAGATCTTAAGAAACAACTGGAAGTG  
TTACTTTTGGAGAAATACCCTGGGCAGTTCCCTCCAGAACAACCTCCAGATTTGCATCAGG  
AAGCAAGGGTCTGCTCATTATCTTCAGAGTCTAGAGCTAAAAATCCAGGACCAGGGATTTTC  
AAGCCAGTTTTCTCAGTGGGCAGATGATGTGACCTTTGATCTCACAAGAGTATATCAGCGC  
TTAGTAATCACAGCCCAGAACAGGAAAGTAATGGTTTCCAACCATCCCTCTAATTATGAACC  
ATCACCCAAGAGATTCTGCATCAGCCAAGTGATGTGTTCCCAGAGCTTCTCTACTGGGTGC  
CACTACTGGGAAGTAATTACCAAGGACAGTGATGGATGGGCTGTTGGAGTTGCTCATGAAA  
TGATTGGTAGAAAAGATAAATTGGGAAGATCAGAGCATTCTGGTGTGTGGAATGGGTAGG  
TCCCCAAAAGCAGCTGTCAGCATGGCATAGGGGTCAAGAAACATTATTAACAGGGAGAAA  
CCATTGAAGGTTGGAGTCTTCCTCGAACTACAAAAGAAGAGCGTGTCAATTTTACTCCATCA  
CAGACAAAGAAATGCTCTTGCTACTTTTGAATCAATACGTCAAATCCTCTTTACCCTGCC  
TTCTGGTTATATAATCTAGAGAGAAATGGATCTTTAACTATAAGTCATACAAACAGGAGGTA  
A

>saxicola\_maurus-riplet

ATGGCCGCCGTCATCGAGCTGGAGCAGCTGCAGCGCGTCCTGGAGCTGCAGTGCTCCTG  
CTGCCCTTCAGCCCTTCGCCGAGCCCGTGCGGCTCACGGGCTGCGGCCACAGCTTCTGCC  
GGGGCTGCATCCTCCGCTACTGCTCGGGCCGGCCCCGCGCCCTCTGCCCCGCTCTGCCGC  
CGCCCCCTTCGAGCCGCAGCACCTGCGGCCCAACCGCGAGCTGGCCGCGCTGCTCAGCCT  
CATCCCGCGGGAGCTGCAGGACAGGTGGGAAACGCAGCAGGAGCCGGAGCCCTGTGGC  
GCTGCTGCCTGCAACGACCTGAGCGCCGCGGGGCGGGCACCTGCGGAGAAGGAGGAAG  
AGATATGGGAGAGCTCCAAGCACCAAGAAATAACTGCAGAGACCATCCACCTGTTGAGGA  
AAGATCTCAATAAAACAAAGGAATATACATCTCAGGTCAAAGCCAGATTACTAAAGATTTTC  
TGTTGCATGAAGGAATATGTTGAGAGACAGAAGAGAAACACACTGATGTTTCATTGAACAAG

AGCAAAAAGCTGCTCAGCAGAAAATTGAAGAGACTATTACCAGCTCACAGACATCAAAGC  
CCAAACTAGTGACTTATCTGAGAGGCAGAGGTATGAAGGCCACCTTCAACAATTAATAAA  
ATTACACTTGATGAGAAGCTTAATGTTGTCAAAAGTGCTGTAGAAGATCTTAAGAGAAAGTT  
GGAAATTTTACTCTTGGAGAATTATGCTCAGCAACTCCCACCAGTGCAGCCTTCAGACTCA  
TATCAGGAGCCAAGTGTTTGCTCATCATCTCCAGAGTCTGCAGCTCAAAGTCCTGAACCGA  
GTGTTTCCAGCCCCCTTTTCTCAGTGGGCAGAGGATGTGACTTTTGACCCCAAGAGTACA  
CGAGCGCTTGGCACTCACAGCCCAGAACAGGAGAGTGGTGGTTTCCAGCCACCCAACCAC  
TTATCAACCATCACCCAAAAGATTCTGCATCAGCCAAGTGATGTGTTACAGGGCTTCTCTA  
CTGGGAGCCACTACTGGGAAGTAATTACCAAGGACAGTGATGGATGGGCTGTTGGAGTTG  
CTCTTGAAATGATTGGTAAAAGGGAGAAATTGGGAAGAACTGAGAATTCCTGGTGTGTAGA  
ATGGGTGGGTCTAAAAAACAGCTGTCAGCATGGCATAAGGATCAAGAAACATTATTACAC  
AAGGACAAACCACTGAAGGTTGGAGTTTTCTGGAGCTACAAAAGAAGATCGTGTCTGTTTT  
ACTCCATTGCTGACAAAGAAATTTTTTGCACACCTTTGAAATCAGTACCTCAAATCCTCTCT  
ACCCTGCTTTCTGGCTGTACACTCTAGAAAGAAATGGATCTTTAACTATAAGTCAGCCAAAT  
AGGAGATAA

>scolopax\_mira-riplet-partial

ATGGCCGCCGCGCTCAGCCTGGAGCGGCTGCTGGAGGCCGTGGAGCTGAGATGCGCCTT  
CTGCCTGCAGCTCTTCAGCGAGCCGGTGCTGCTGGCGGGCTGCGCCCACAGCTTCTGCC  
GGCCCTGCCTCCTCCCGCTCTGCCGGGGGAAGCGGCGCGCCTGCTGCCCGCTCTGCCG  
GGAGGGCTTCGAGCTGAAGGACCTGCGGCCCAACCGGGAGCTGGCCGCTTTGGTGAGCT  
TGATCTCAGAGGTGGTAAAGGAGGAAGAGCTGGCAACGCGGGATGAAACGAAACCCTCC  
GCAGCCGTTCCCTGCAGCGACCGGAGCTCGGTGGGGCGGCGACCGGAGGAGAAGGAAT  
ATGCATCTCAGATCAGAAGTCAGATTACTGCAGATTTTTGTTGCATGAAGGAATATGTTGAG  
AGACAGGAGAGAAACACGCTGATGTTTATTGAACAGGAGCAAAAAGCAGCTCGAGAGACG  
ACTCACCAGCTCTGTGGTGAAGTGAACAAGCTCACAGACACCAAAGCCCAAATGAATAATT  
CCCCTGAAAAAGAGAGCTACAAAGGCACGCCTTCAACAGTGAATAAATGACACTTGATGA  
GAAGCTTAATGTTGTCAAACTGCTGTAGAAGATCTTAAGAGAAAGTTGGAAATTTTATTTT  
GGACTACACTCAGCAGTTCCCAGCAGTGCAACCTCCAGACTTGTGTCAGAAGACAAGTGT  
CTGCTCATTATCTCCAGTGTCTGCAGCTAGAAATCCAGAACCGATGATTTCAAGCCAAATTT  
CTCAGTGGGCAGCTGATGTGGTTTTTGTATGCCACAAGAATAAATAAGCACTTAGTGCTCAC  
AGCCCAGAACAGGACAGTAATGGTTTTCCAGTTGCCCGATGGATTACGAGCCGTCGCCCAA  
CAGATTCTGCATCAGCCAAGTGATGTGTTCCAGAGCTTCTCTGCTGGGTGCCACTACTGG  
GAAGTAATCACCAAGGACAGTGATGGATGGGCTGTTGGAGTCGCTCATGAAATGATGGGG  
AAAAGGGATAAATTAGGAAGAACAGAGCATTCTGGTGTGTGGAGTGGCTAGGTCCCAAA  
AAGCAGCTATCAGCATGGCATAGAAATCAAGAGACGTTATTACACAAGGATAAACCATTGA  
AGGTTGGAGTTTTTCTGGAGCTCCAAAAGAAAAGTGTGTCCTTTTACTCCGTCACTGACAAA  
GAAATGCTTTTGCATACCTTTGAAATCAATACTTCCAATCCTCTTTACCCTGCTTTCTGGCTA  
TATGGTCTAGAAAGAAATGGATCTTTAACTCTAAGTCCCACAAACAGGAGGTAA

>serinus\_canaria-riplet

ATGGCCGCCGCTCATGGAGCTCGAGGGGCTGGAGCTGCAGTGCTCCTGCTGCCTGCAGCT  
CTTCGCGGAGCCCGTGCGGCTCTCGGGCTGCGGCCACAGCTTCTGCCGGGGCTGCATCC  
TCCGCTACTGCGCGGGGCGGCCCGCGCCCCCTGCCGCTCTGCCGGTGCCCTTCGA  
GCCTCAGCACCTGCGGCCCAACCGCGAGCTGGCCGCGCTGCTCAGCCTCATCCCGCGGG  
AGCTGAAGGAAGAGTTGGAACGCAAGAGGAGCTGGAAGCCTATGGAGCTGCTGCCTGC

AACGGCCTGAGTTCGGCGGGGCGGGGACGTGGGGAGAAGGAGGAGGAGACAGGGGAGA  
GCTCCAAGCAACAAGAAATAGCTGCAGAGACCATCCAGCTGTTGAGGAAAGATCTCAATAA  
AACAAAGGAATATACATCTCAGATCAAAAGCCAGATTATTAAGATTTCTGTTGCATGAAGG  
AATATGTTGAAAGACAGGAGAGAAACACACTGATGTTCAATTGAACAACAGCAAAAAGCTGC  
TCAACAGAAAATTGAAGAGACTATTCACCAGCTCACAGACATCAAAGCCCCAACTAGAGAC  
TTATGTGAGAGGCAGAGGTACGAAGGCTCACCTTTGACAATAAATAAAATTACACTTGATGA  
AAAGCTTAATGTTGTCAAAAGTGCTGTAGAAGATCTTAAGAGAAAGTTGGAAATTTTACTCT  
TGGAGAATTATGCTCAGCATCTCCCACCAGTGCATCCTCCAGTCTTACAACAGGAGCCAAG  
TGTCAGCTCATCATCTCCAGAGTCTGCAGCTGAAAGTCCTGAACCAACCATTTCAGCCAG  
TTTTCTCAGTGGGCAGATGATGTGACTTTTGACCCCTCAAGAGTACACGAGCGCTTGGCAC  
TCACAGCCCAGAACAGGAGAGTGATGGTTTCCAGCCACCTGAGCAGTTATCAGCCATCAC  
CCAAAAGATTCTGCATCAGCCAAGTCATGTGTTACAGGGCTTCTCTACTGGGTGCCACTA  
CTGGGAAGTAATTACCAAGGACAGTGATGGATGGGCTGTTGGAGTTGCTCATGAAATGATT  
GGTAAAGGGACAAATTGGGAAGAACTGAACATTCTTGGTGTGTAGAATGGCTAGGCCCTA  
AAAAACAGCTGTCAGCATGGCATAAGGGTCAAGAAACATTATTGGACAAGGACAAACCACT  
GAAGGTTGGAGTTTTCTGGAGCTACAGAAGAAGACTGTGTCAATTTTACTCCATCTCTGAC  
AAAGAAGTGCTTTTGCACACCTTTGCAATCACTACCTCAGATCCTCTCTACCCTGCTTTCTG  
GCTGTACACTCTAGAGAGAAATGGATCTTTAACTATAAGTCAGCCAAACAGGAGATAA

>stictonetta\_naevosa-riplet

ATGGCTGCTCAGGCAGAGCTGGGTGCGCTACTGGCAGACGTGGAGCTGAGCTGCTCCTG  
CTGCCTGCAGTACTTCACCGAGCCCGTGCGGCTGGCGAGCTGCAGCCACAGCTTCTGCC  
GGCCCTGCATCGACGCCTACTGCAGGGGAAAGCGGCGCGCCACCTGCCCGCTCTGCCGG  
GAGGGCTTCGAGCTGAAGGACCTGCGGCCCAACCGGGAGCTGGCCGCCCTGGTCAGCCT  
GGTGCTGAACGGGGGAATGGGCGACGGGCTGGGGACGTGGGACGAGCCCAGACCTTCT  
GGAGATGGTGCCGGCGGTGGATGGAGCTCTGCGGGGCGGCGACCCGGGGAGAAGGAGG  
AACAGATACGTGACATCTCCAAGCAACTCAAAATAACTGAAGAGACCATCAACATCTTGAG  
GAAGGATCTCAGTAAACAAAGGAATATACATCTCAGGTCCTAAGCCAGATTACTAAAGACT  
TCTGTTGCATGAAGGAATATATTGAAAGACAAGAGGAAACACACGGATGTTCAATTGAACA  
GGAGCAAAGAGCAGCTCAACAGAAGATTGAAGAGAGTATTCACCAGCTCTGTGTTGAAAAG  
AACAACTCACAGACATCAAAGCCCAGATGGAGAAAGGCTTAGGAAGTGATGAAATGAAGT  
GGCAGAATAGTAACTTCCTTGAGAGAGAGGGGTACAAAGGCTCACCTTCAACAGTGAATAT  
ATTTACAATTGATGAGAAGTTTAATGTTGTCAGAAGTGCTGTAGGAGATCTTAAGAGAAAGT  
TGGAATCTTACTTTTGGAGGAATACCCTCAGCAGTTCCCACCAGTACAATCTCCAGCCTTA  
TATCAAGAGACACGTGTCTGCTCATTATCTTCAGAGTCTGCAGCTAAAAGTTTCAGAACCAA  
GCATTTCAAGCCAGTTTTCTCAGTGGGCAGATAATGTGACTTTTCGATCTCACCACAGCATAT  
GACCGCTTAGCAATCACAGCTCAGAACAGGAAAGTAATGGTTTCCAGCAACCCAACTTACT  
ATGAACCATCACTCAAGAGATTCTGCATCAGCCAAGTGTTGTGTTCCAGGGCTTCTCTAC  
TGGGTGCCACTACTGGGAAGTAATTACCAAGGACAGTGATGGATGGGCTGTTGGAGTTGC  
TTGTGAAACGATTGGTAGAAGGGACAAGTTAGGAAGAACAGAGCATTCCTGGTGTGTAGAA  
TGGGTAGGTCCCCAAAAGCAGTTGTCAGCATGGCACAAGGATCAAGAAACACTATTACGCA  
GTGATAAACCATTAAGGTTGGAGTTTTCTGGAGCTACAGAAGACTGTGTCAATTTTATGC  
CATCACTGACAGAGAAATGCTTTTGCATACATTTGAAATCAATACCTCAGTTTCTTTATCC  
TGCTTTCTGGCTCTACAGTCTAGATAAAAATGGATCTTTAACTATAAATCACATAAACAGGA  
AGTAA



>strigops\_habroptila-riplet

ATGGCTGCCGCGGTGCCCCCTGGGGCGGCTGCTGGGCGCGGTGGAGCTGAGCTGCGCCT  
GCTGCCTGCAGCACTTCGCGAAGCCGGTGGGCTCCCGGGCTGCGGCCACAGCTTCTGC  
CAGCGCTGCATCCTCCAGTACTGCAAGGGGAGGCAGCGCGCCGCCTGCCCGCTCTGCCG  
GGAGGACTTCGAGCGGAAGGACCTGCGGCCCAACCGGGAGCTGGCCGCTTTGGTGAACC  
TCATCCGGCAGGAGGTAAAGGAAGAGTTGGAAGCACAGGATGACCCGAACCCCTCCGCA  
GCTGTTGCCTGCAACGACCAGAGCTCGGCGGGACGGCGACATGGGGACAAGGAGGAAGA  
GATACAGGACATCTCGAAGGAACTGGAGGTGACTATAGAGACCATCCATCTCTTGAGGGA  
AGAGCTCAGTAAAACAAAGGAATATACGTCTCAGATCAAAAGCCAGATTACAAGAGATTTC  
GTTGCATGAAGGAATATGTTGAAAGACAGGAGAGAAACACACTGATGTTTCATTGAACAAGA  
GCAAAAAGCAGCTCAACAAAAAATTGAAGAGACTATTGACCAGCTCTGCATTGAAGTGAAT  
AGGCTCACAGACATCACAGCCCAACAAGCACCCCTGCCTGAGAGACATAGGTACAAAGAC  
TTGTCTTCAACAATGGATAAAATTACACTTGATGAGAACTTAATGTTGTCAAAGTGCTGTA  
GAATTTCTTAAGAGAAAGTTGGAAATTTTGCTTTTGGAGAAATACCCTGAGCAGTTCCCACC  
AGTGCAACCTCCAGACTTATGTCAGGAGACAACTGAGTGCTCCTTATCTCCAGAGTCTGCA  
GCTAAAAATCCAGAACCAGTGAATTCAAGCCGTTTTTCCCAATGGGCAGATGATGTGACTT  
TTGATCTCACAAGAGCCTATGAGCGCTTAGCAATCACAGCCCAGAACAGGAAAGTCATGGT  
TTCCAGCCACCCGACTGACTATGGACCATCGCCCAACAGATTCTGCATCAGCCAAGTGATG  
TGTTTCGAGAGCTTCTCTATTGGGTGCCACTACTGGGAAGTAGTTACCAAGGACAGTGATG  
GATGGGCTGTTGGAGTTGCTCATAAAATGATTGGTAAAAGGGAAAAATTAGGAAGAACAGA  
GCATTCCTGGTGTGTGGAATGGCTAGGCCCAAAAAGCAGCTGTCAGCGTGGCACAGGGA  
TCAAGAAACATTATTAGACAAAGATAAACCACTGAAGGTTGGAGTTTTCTTGAGCTACAGA  
AGAAGACCGTGTCAATTTTATTCCATCACTGACAAAGAAATGCTTTTGCATACTTTTGAAATCA  
GTACCTCAAATCCTCTTTACCCTGCTTTCTGGATATATGGCTTAGAAAGAAATGGATCTTTA  
ACTATAAGTCACACAAACGGGACATAA

>strix\_occidentalis-riplet

ATGGCCGCTGCCGTGGACCTCGAGCGGCTTCTGAGCGCCGTGGAGCTAAGCTGTGCCTG  
CTGCTTGCAGCACTTCACGGAGCCCGTGCGGCTCACGGGCTGCGGCCACAGCTTCTGCC  
GGGCTGCATCATCAGGTACTGCAAGGGGAGGCAGCGCGCCGGCTGCCCGCTCTGCCG  
GGAGGGCTTCGAGCTGAAGGACCTGCGGCCCAACCGGGAGCTGGCCGCTCTGGTGAACC  
TCGTCTGCAGGAGGTACAGGGAGAAGAGTTGGAACCGCGGGATGAACCGGGACCCTCC  
GGAGATGTGGCCTGCAACGACCGGAGCTCGGCGGGGCGGCGACCTGGGGAGAAGGAGG  
AAGAGATATGGGACATCTCCAAGCAACTAGAAATGACTGCAGAGACCATCCACCTCTTGAG  
GACAGATCTCAGTAAAACAAAGGAATATACATCTCAGATCAAAAGCCAGATTACTAAAGATT  
TCTGTTGCATGAAGGAATATGTTGAAAGACAGGAGAGAAACACACTGAGGTTTCATTGAACA  
AGAACAAAAAGCAGCTCAACAGAAAATTGAAGAGACTATTCACCAGCTCTGTGTGGAAATG  
AACAAGCTCACAGACATCAAAACCCAAACGAGTAACCTATCTGAGAGACATAGGTACAAAG  
GCTCACCTTCAACAGTGGATAAAATTACCCTTGATGAGAACTTAATGTTGTCAAACCTGCT  
GTAGAAGATCTTAAGAGAAAGTTGGAGATTTTACTTTTCGGAGAAGTATGCTCGGCAGTTCC  
TACCAGCACAACCTCCAGACTTATATCAGGGGACAAATGTCTGCTCATTATCTCCAGAGTC  
TGCAGCTAAAAATCCAGAACCAATGATTTCAAGCCAGTTTTCTCAGTGGGCAGATGATGTG  
ACTTTTGATCTCACGAGAGTATATGAGCGCTTAGCAATCACAGCCCAGAACAGGAAAGTAA  
TGGTTTCCAGCTACCCAACCTGATTATGAACCATCACCCAACAGATTCTGCATCAGCCAAGT  
GATGTGTTTCGAGAGCTTCTCTACTGGGTGCCACTACTGGGAAGTAATTACCAAGGACAGC

GATGGATGGGCTGTTGGAGTTGCTCATGAAATGATTGGTAAAAGGGACAAATTAGGAAGAA  
CAGAGCATTCTGGTGTGTAGAAATGGCTAGGTCCCAAAAAGCAGCTGTCAGCATGGCATA  
GGGATCAAGAAACATTATTGCACAAGGATAAACCACTGAAGGTTGGCATTTCCTGGAGCT  
ACAAAAGAAGACTGTGTCAATTTTATTTCGATCACTGACAAAGAAATGCTTTTGCATACTTTTGA  
AATCAATAGCTCAAATCCTCTTTACCCTGCTTTTTGGCTATATAGTCTAGAAAGAAATGGAT  
CTTTAACTATAAATCACACAAACTGGAAATAA

>struthio\_camelus-riplet

ATGGCGGCCTCTGTGGATCTCCGGCAGCTCCAGGCCAAGCTGGACTTGAAGTGCCCATGC  
TGCCTGCTGTACTTCACCGACCCCGTGCGGCTCGCAGGCTGCAGCCACAGCTTCTGCCG  
GTCCTGCATCACCACCTACTACTGCAAGGTGAAGAGGAGCGCCGGCTGTCCGCTCTGCCG  
CGAAGGCTTTGAGCTGAAGGACTTACGGCCCAACCGGGAGCTGGCCGTTCTGGTGAAGTT  
GGTCCCCAGGGAGGAAAAGGAGAAAGAGTGGGAGAGAGAGGAGGAACCGGAACCGGCC  
AGAGCTGGCGCCTGGGGTGGCCAGCGCTCAGCAGGGCGGAGAGAAGCCGTGAAGGAGG  
AAGAGATAAGTGAGATCTCCAAGCAACTGGAAATGACTGAAGAGACCATCCGCCTCTTGAG  
GGAGGATCTCAGTAAAACAAAGGAATATACATTTTCAGATCAAAAGCCAGATTACTAAAGATT  
TCTGTTGCATGAAGGAATACATTGAAAGGCAGGAGAGAAGCACACTGATGTTTCATTGAACA  
AGAGCAACAAGCAACGCAACAGAAAAATTGAAGAGACTATTGACCAGCTCTGTGTTGAAGTG  
AACAAGCTCACAGACATCAAAGCCCCAAATGGAGAAAGGACTGGTAAGTGATGAAACGAGG  
TGGCTGAATGGTAACTTACCTGAGAGAGATAGGTACAAAGGCTCACCTTTAACAACAGATA  
AAATTATACTTGAGGAGAAGATTAACGTTGTCACAAGTGCTGTAGACGATCTTAAGAAACAA  
TTGGAATGTTACTTTTTGGAGAAATACCCTGGGCAGTTCCCACCAGAACAACCTCCAGACT  
TACATCAGGAGACAAGGGTTTGCTCAATATCTTCAGAGTCTGCAGCTAAAAATCCAGAGCC  
AGGGACTTCAAGCCAATTTTCTCAGTGGGCAGATGATGTGACCTTTGATCTCACAAGAATA  
TATCAGCACTTAGTAATCACAGCCCAGAACAAGAAAGTCATGGTTTCCAGCTATCCCTCAG  
ATTATGAACCATCACCCAAGAGATTCTGCATCAGCCAAGTGCTGTGTTCCAGAGCTTCTC  
TACTGGCTGCCACTACTGGGAAGTAATTACCAAGGACAGTGATGGATGGGCTGTTGGAGT  
TGCTCATGAAATGATTGGTAAAAGAGATAAATTGGGAAGGTCAGAGCATTCTGCTGTGTG  
GAATGGGTAGGTTCAAAAAAGCAGCTGTCAGCATGGCATAGGGATCAAGAAACATTATTAA  
ACAGGGAGAAACCATTGAAGGTTGGAGTTTTCTCGAGCTACAAAAGAAGACCGTCTCATT  
TTACTCCATCATGGACAAAGAAATGCTCTTGACACTTTTGAAATCAATACCTCAGATCCTC  
TTTACCCTGCTTTCTGGTTGTATTGTCTAGATAAAAATGGATCTTTAACTATAAGTCACACAA  
AGAGGAGGTAA

>sturnus\_vulgaris-riplet

ATGGCTGCTGTCATCGAGCTCGAGCGGCTGCAGCGCGTCCTGGAGCTGCACTGCTCCTTC  
TGCCTGCAGCTCTTCGCGGAGCCCGTGCGGCTCACGGGCTGCGGCCACAGCTTCTGCCG  
GGAAGTGCATCCTCCGGTACTGCCTGGGGCGGCCCCGCGTCCTCTGCCCGCTCTGCCGGC  
GCCCCCTTCGAGCCCCAGCACCTGCGGCCCAACCGCGAGCTGGCCGCGCTGCTCAGCCTC  
ATCCCGCGGGAGCTGCAGGAAAGCTTGGAACACAGGAGGAGCCGGAGCCCCGTGGAGC  
TGCTGCCTGCAACGACCTGAGCTGGGCGAGGCGGGGACCTGGGGAGAAGGAGGAAGAG  
ATATGGGAGAGTTCCAAGCAACAAGAAATAACTGCAGAGACCGTTACCTGTTGAGGAAAG  
ATCTCAATAAAACAAAGGAATATACATCTCAGATCAAAAGCCAGATTACTAAATATTTCTGTT  
ACATGAAGGAATATGTTGAAAGACAGGAAAGAAACACACTGATGTTTCATTGAACAAGAGCA  
AAAAGCTGCTCAACAGAAAAATTGAAGAGACTATTACCAGCTTACAGACATCAAAGCCCAA  
ACTAGTGATTTATCGGAGAGGCAGAGATATGAAGGCTCACCTTCAACAATTTATAAAATTAC

ACTTGATGAGAAGCTTAATGTTGTCAAAAGTGCTGTAGAAGATCTTAGAAAAAAGTTGGAAA  
TTTTACTCTTCGAGAATTATGCTCAGCAACTCCCACCAGTACAACCTCCAGACTCGTATCAG  
GAGCCAAGTGTCTGCTCATCATCTCCAGAGGCTGCAGCTGAAAGTCCTGAACCAAGCATT  
CCAGCCCGTTTTCTCTCTGGGCAGAGGATGTGACTTTTGACCCCAACAAGAGTACACGAGC  
GCTTGGCACTGACAGCCCAGAACAGGAGAGTGATGGTTTCCAGCCATCCAACCACTTATC  
AACCATCACCCAAAAGATTCTGCATCAGCCAAGTGATGTGTTACAGGGCTTCTCTACTGG  
GAGCCACTACTGGGAAGTAATTACCAAGGACAGTGATGGATGGGCTGTTGGAGTTGCTCA  
TGAAATGATTGGTAAAAGGGAGAAATTGGGAAGAACTGAGCATTCTGTTGTGTAGAATGG  
CTGGGTCCTAAAAACAGCTGTCAGCATGGCATAAGGATCAGGAAACATTATTACAGAAGG  
ACAAACCACTGAAGGTTGGAGTTTTCTGGAGCTACAAAAGAAGACCGTGTCATTTTACTC  
CATCACTGACAAAGAAATGCTTTTGCACACCTTTGAAATCAGTACCTCAAATCCTCTCTACC  
CTGCTTTCTGGCTGTTCACTCTGGAAAGAAATGGATCTTAACTATAAGTCAGCCAAACAGG  
AGATAA

>sylvia\_atricapilla-riplet

ATGGCTGTGCTCATCGAGCTGGAGCGGCTGCAGCGCGTCCTGGAGCTGCACTGCTCCTG  
CTGCCTGCAGCTGTTCCGCGAGCCCGTGCGGCTGTGCGGCTGCGGCCACAGCTTCTGCC  
GGGGCTGCATCGTGCGGTACTGCGCGGGGCCGGCCCCGCGCCCCCTGCCCGCTCTGCCG  
CCGCGCCTTCGAGCCCCGGCACCTGCGGGCCCAACCGCGAGCTGGCCGCGCTGCTCGGC  
CTGCTCCCGCGGGACATCGCCGAGGGGCTGGAGACGGAGCAGGGGGCCGGCACCCCTTCG  
CAGCTGCTGCCTGCCACGGCCGGAGCTCGGCAGCGCAGACACCTGGGGAGCAGGAGGA  
AGAGATATGGGAGAGCTCCAAGCAACAAGAAATAACAGCAGAGACCATCCACCTGTTAAGA  
AAAGATCTCGATAAAGCAAAGGAATATACATCTCAGATCAAAGGCCAGATTATTAAGATTT  
CTGTTGCATGAAGGAATATGTTGAAAGACAGGAGAGAAACACACTGGTGTTGATTGAACAA  
GAGCAAAAAGCTGCTCAACAGAAAATTGAAGAGACTATTCACCAGCTCACAGACATCAAAG  
CCCAACCTAGTGACATATCTGTGAGGCAGAGGTATGGAGGCTCACCTTCAAGAATTAATAA  
AATTATACTCGATGAGAAGCTTAATGTTGTCAAAAGTGCTGTGGAAGATCTTAAGAGAAAAT  
TGGAACCTTTACTCTTGGAGAATTATGCTCAGCAACTCCCACCACCAGTGCAGCCTGCAGA  
CTTGTACCAGGAGCCAAGTGTCAGCTCATCATCTCCAGAGGCTGCAGCTGAAAGTCCTGA  
ACCAGCCAATTCCAGCCAGTTTTCTCAGTGGGCAGCTGATGTGACTTTTCGACCCTTCAAGA  
GTACACAAGCACTTGGCACTCACAGCCCAGAACAGGAGAGTGGTGGTTTCCAGCCAGCTG  
ACCACTTACCAACCATCACCCAAAAGATTCTGCATCAGCCAAGTGATGTGTTACAGGGCT  
TCTCTACTGGCTGCCACTACTGGGAAGTCATTACCGAGGACAGTGATGGATGGGCTGTTG  
GAGTTGCTCAGGAAATGATTGGTAAAAGGGACAAATTGGGAAGAACTGAGCATTCTGGTG  
TGTAAGATGGCTGGGGCCCTAAAAACAGCTGTCAGCGTGGCATAAGGATCAAGAAACATTA  
TTACACAAGGACAAACCTCTGAAGTTTGGAGTTTTCTGGAGCTACAAAAGAAGACTGTGT  
CATTTTACTCCATCGCTGACCAAGAAATGCTTTTGCACACCTTTGAAGTCAGTGTCTCAAT  
CCTCTGTACCCTGCCTTCTGGCTGTACACTCTAGAAAGTAATGGATCTTAACTCTAAGTCA  
GCCAAACAGGAGATAA

>taeniopygia\_guttata-riplet

ATGGCCGCGGTCTCGAGCTCGAGAGGCTGCAGCGCGTCCTGGAGCTGCACTGCTCCTG  
CTGCCTGCAGCTCTTCGCGGAGCCCGTGCGGGTCACGGGCTGCGGCCACAGCTTCTGCC  
GGGGCTGCATCCTCCGGTACTGCGCGGGGCGGCGCCGCGCCGCCTGCCCGCTCTGCCG  
CCGCGCCTTCGAGCCGACAGCACCTGCGGGCCCAACCGCGAGCTGGCCGCGCTGCTCAGC  
CTCATCCCGCGGGAGCTGAAGGAAACCTTGGAAGCACAGGAGGAGCCGGAAGCCTATGG

AGCTGCTGCCTGCAACGACCTGAGCTCGGCGGGGCGTGGACGTGGGGAGAAGGAGGAA  
GAGATACAGGAGAGCTCCAAGCAACAAGAAATAACTGCAGAGACCATCCACCTGTTGTGG  
AAAGATCTCAATAGAACAAAGGAATATACATCTCAGATCAAAAGCCAGATTACTAAAGATTT  
CTGTTGCATGAAGGAATATGTTGAAAGACAGGAGAGAAACACACTGATGTTTCATTGAACAA  
CAGCAAAAAGCTGCTCAACAGAAAATTGAAGAGACTATTCACCAGCTCACAGACATCAAAG  
ACCAAAGTAGAGACTTATGTGAGAGACAGATGTATGAAGGCTCACCTTTGACAATAAATAAA  
ATTACACTTGATGAAAAGCTTAATATTGTCAAAAGTGCTGTAGAAGATCTTAAGAGAAAAGTT  
GGAAATTTTACTCTTGGAGAATTATGCTCAGCAACTCCCACCAGTGCGAGCCTCCAGACTTC  
TACCAGGAGCCAAGTGTGAGCTCATCACCTCCAGAGCTTGTGGCTGAGTGTCTGAACCA  
GCCATTTCCAGCCACTTTTCTCAGTGGGCAGATGATGTGACTTTTGATCCCACAAGAGTAC  
ACGAGCGCTTGGCACTCACAGCCCAGAACAGGAGAGTGATGGTTTCCAGCCATCCCACCA  
GTTATCAACCATCCCCCAAAGATTCTGCATCAGCCAAGTCATGTGCTCACAGGGGCTTCTC  
TACTGGGTGCCACTACTGGGAAGTGATTACCAAGGACAGTGATGGATGGGCTGTTGGAGT  
TGCTCATGGAATGATTGGTAAAAGGGACAAATTGGGAAGAACTGAGCATTCTGGTGTGTA  
GAATGGCTGGGTCCTAAAAAACAGCTATCAGTGTGGCATAAGGATCAAGAAACATTATTAC  
ACAAGGACAAACCACTGAAGGTTGGAGTTTTTCATGGAGCTAGAGAAGAAGACTGTGTTCATT  
TACTCTATCGCTGACAAAGAAATTCTTCTGCACACCTTTGAAATCAATACCTCACATCCTCT  
CTACCCTGCTTTTCTGGCTGTATACTCTAGAAAGGAATGGATCTTTAACTATAAGTCAGCCAA  
ACAGGAGATAA

>tauraco\_erythrophus-riplet

ATGGCGGCCGCTGTGGAGCTCGAGCGGCTGCTGGGCGCCGTGGAGCTGAGCTGCACCT  
GCTGCCTGCAGTTCTTCACGGAGCCCCTGCGGCTCTCGGGCTGCACCCACAGCTTCTGCC  
GGCCCTGCATCGTCGCGTACTGCAAGGGCAGGCGGCGCGCCGGCTGCCCGCTCTGCCG  
GGAAAGCTTCGAGCTGAAGGACCTGCGGCCCAACCGGGAGCTGGCCGCTTTGGTGAGCT  
TGATCCCGCAGGAGGTAAAGGAAAAAGAGTTGGAACACGGGATGAACCGAAACCCTCTG  
GAGCTATCGCCTGCAATGACGGGAGCTCGGCGGGGCGGCCGCTGGGGAGAAGGAGGA  
AGAGATATGGGACATGTCCAAGCAACTAGAAATTACTTCAGAGACCATCCACCTCTTGAGG  
AAAGATCTCAGTGAAGCAAAGGAATATGCATCTCAGATCAAAAGCCAGATTACTAAAGATTT  
CTGTTGCATGAAGGAATATATTGAAAGACAGGAGAGAAACACACTGATGTTTCATTGAACAA  
GAGCAGGAAGCAGCTCAACAGAAAATCGAAGAGACTATTCACCAGCTCTGTGTTGAAGTGA  
ACAAGCCCACAGACATCAAAGCCCAAACGAGTAACTTACCTGAGAGACATAGGTACAAAGG  
CTCACTTTCAACAATGAATAAAATTACACTTGATGAGAAGCTCAATGTTGTCAAAAGTGCTG  
TCGAAGATCTTAAGAGAAAGTTGGAAATTTTACTTTTGGAGAAATATGCTCGGCAGTTCCCA  
CCAGTGCAACCTCCAGATTTATATCAGGAGCCAAATGTCTGCTCGTTATCTCCAGAATCTG  
CAGCTAAAAATCCAGAACCAACGATTTCAAGCCAGTTTTCCAGTGCGGAAGATGATGTGAC  
TTTTGATCTCACAAGAGTACATGAGCGCTTAGCAATCACAGCCCCAAAACAGGAAAGTAATG  
GTTTCCAGCTACCCAACCTGGTTATGACTCATACCCAACAGATTCTGCATCAGCCAAGTGA  
TGTGTTACAGAGCTTTTCTACTGGGTGCCACTACTGGGAAGTAATTACCAAGAACAGTGA  
TGGATGGGCTGTTGGAGTTGCTCATGGAATGATTGGTAAAAGGGACAAATTAGGAAGAACA  
GAGCATTCTGGTGTGTAGAATGGCTAGGTCCCAAAAAGCAGCTCTCAGCATGGCATAGG  
GATCAAGAAACATTATTACACAAGGATAAACCATCGAGAGTTGGTGTCTTCTGGAGCTACA  
AAAGAAGACTGTATCATTTTACTCCATCACTGACAAAGAAATGCTTTTGCATACCTTTGAAAT  
CAATACCTCAAATCCTCTTTACCCTGCTTTCTGGCTATATAGTCTGGAAAGAAATGGATCTT  
TAGCTATAAGTCATACGAACAGGAGGTAA

>thalassarche\_chlororhynchos-riplet

ATGGCTGCTGCTGTGGACCTCGAGCGGCTCCTGCGCGCCGTGGACCTGCACTGCGGTTG  
CTGCTTGCAGTACTTCACGGACCCCGTGGGCTCACGGGCTGCACCCACAGCTTCTGCCG  
GCCCTGCATCATCGAGTACTGCAAGGGGAGGCAGCGCACCTGCTGCCCCTTCTGCCGGG  
AGGTCTTCGAGCTGAAGGACCTGCGGCCCAACCGGGAGCTGGCCGCTTTGGTGAACCTAA  
TCCTGCAGGAGGTAAAGGAAGAAGAGTTGGAACACAGGATGAACTGAAACCTCCGGAG  
CTGTTGCCAGCAACGACCGGAGCTCGGCGGGGCGGCGACCTGGGGAGAAGGAGGAAGA  
GATATGGGACCTCTCCAAGCAACTAGAAATGACTGCAGAGACCATCCAACCTCTTGAGGAAA  
GATCTCAGTAAAGCAGAGGAATATGCATCTCAGATCAAAAGCCAGATTACTAAAGATTTCTG  
TTGCATGAAGGAATATGTTGAAAGGCAGGAGAGAAACACACTGATGTTTCATTGAACAAGAG  
CAAAAAGCAGCTCAACAGAAAATCGAAGAGACTATTCACCAGCTCTGTGTTGAAGTGAACA  
AGCTCATAGACATCAACACCCCAAACAGTAACCTTACCTGAGAGACATAGGTACAAAGGCTC  
ACCTTCAACAATGAATAAAATTACACTTGATGAGAAGCTTAATGTTGTGAAAAGTGCTGTAG  
CAGATCTTAAGAGAAAAGTTGGAAATTTTACTTTTGGAGAAGTACACTCAGCAGTTCCACCA  
GTGCAACCTCCAGACTTATATCAGGAGACAAATGTCTGCTCACTATCTCCAGAGTCTGCAG  
CTAAAATCCAGAACCAATGACTTCAAGCCAGTTTTCTCAGTGGGCAGATGATGTGACTTTT  
GATCTCACAAGAGTATATGACCGCTTAGAAATCACAGCCCAGAACAGGAAAGTAATGGTTT  
CCAGCTACCTGCCTGATTATGAACCATCGCCCAACAGATTCTGCATCAGTCAAGTGATGTG  
TTTGCAGAGCTTCTCTACTGGGTGCCACTACTGGGAAGTAATTACCAAGGACAGTGATGGA  
TGGGCTGTTGGAGTTGCTCATGAAATGATTGGTAAAAAGGACAAATTAGGAAGAACAGAGC  
ATTCCTGGTGTGTAGAATGGCTAGGTTCCAAAAAGCAGCTGTCAGCATGGCATAGGGATCA  
AGAAACATTATTACACAAGGATAAACCATTAAGGTTGGAGTTTTCTGGAGCTACAAAAGA  
AGATGGTGTCAATTTTACTCCATCACTGACAAAGAAATGCTTTTGCATACATTTGAAATCAATA  
CCTCAAATCCTCTTTACCCTGCGTTCTGGCTATATAGTCTAGAAAGAAATGGATCTTTAACT  
ATAAATCACACAAACAGGAGATAA

>todus\_mexicanus-riplet

ATGGAGCAGGTGCTGGGCTCGCTGGAGCTGGAGCAGGTGCTGGGCTCGGTGGAGCTGA  
GCTGTGCCTGCTGCCTGCAGGAGCTGCAGGAGCCGCTGCGGCTGCGGCGCTGCGGGCA  
CAGCTTCTGCCGGGCTGCTGCTCAGCCGCTACTGCCGCGGCGCGGGCCCGCAGCGCCTGC  
CCGCTCTGCCGGGAGCCCTTCGAGCTGCCCCGACCTGCAGCCCAACCGGGAGCTGGAGGC  
CCTGTTGAGCCTGGTGC GGCTGCTGGGGAGCGGGGAGGAGCTGGAAACCCGCGATGAG  
CCCGACCCGCGGGGAGCTGCTGCCGCCAACGACCGCAACGCCGAGGGGCGCGGCCTG  
AGGAGAAGGAGGAGGAAGTATGGGACATCTCAAACAGCTAGAAATGACTGCAGAGGCCA  
TCCACGTCTTGAGGAATGATCTCAGTAAAGCAGAGGAACATGCATCTCAGATTAAATGCCA  
GATTACTAAAGATTTCTGTTGCATGAAGGAATATGTTGAAAGACAGGAGAGAAACACACTG  
ATGTTTCATTGAACAGGAGCAAAAAGCAGCTCAGCAGAGAGTTGAAGAGACTATTACCAGC  
TCTGTGTTGACATGAACGAGCTCCTGGACATCAGTGCCCAAATGAGTAACTTACCCGAGAG  
ACATAGATACAAAGGCTCAGCTTTATCAACGAATAAAATTGCACTTAATGGGAAGCTTAACG  
TGGTCAGAAGTGCTGTAGAACATCTTAAGAGAAGGTTGGAAATTTTACTTTTGGAGAAATAC  
GCTCGGCAGATCTCACCAGCGCAACCTCGGGACTTGATCAGGAGACAAGTGCTGCTCG  
TTATCTCCAGAGTCTGCAGCTCAAAATCCAGAGGCAGTGATTTCAAGGCAGTTCTCTCAGT  
GGGCAGAGGATGTAACCTTTTATCTTACCAGAGCACACGAGCGCTTGGCAATCACAGCCC  
AGAACAGGAAAGTGATGGCTTCCAACCTACCCGACTAACTACGAACCATCGCCCAACAGATT  
CTGCATCAGCCAAGTGATGTGTTTCGAGAGCTTTTCGACTGGGTGCCACTACTGGGAAGT

GATTACCAAGGACAGTGATGGATGGGCGGTTGGAGTTGCTCATGAAATGATTGGTAAAAG  
GGACAAATTAGGAAGAACGGAGCATTCTGGTGTGTAGAATGGCTCGGTTCCAAAAAGCA  
GCTGTCAGCATGGCACAGGGATCAAGTAACAGTGTTAGAGAAGGATAAACCCTGAAAGTT  
GGAGTTTTCTGGAACACAAAAGAAGACTGTGTCATTTTACTCCATCACTGACACAGAAAT  
ACTTTTGCATACTTTTGAAATCAATACCTCAAATCCTCTTTACCCTGCTTTCTGGCTGTATAG  
TCTAGAAAAAAATGGATCTTTAACTCTAAGTCCCACAAACAGGAGATAA

ATGGCCGCCGCCGTCCGGCAGGAGCGCGTCTGCTGGACGCGGAGGAGCTGAGCTGCGCCT  
GCTGCCTGCAGCTCTTCAGCGAGCCCGTGCGCCTGTCGGGCTGCGGGCACAGCTTCTGC  
CGCGCCTGCATCGGCCGCCACCTCGGCGCCCGGCAGCGCTCCGCCGCCTGCCCGCTCT  
GCCGCCGGCCCTTCAGCTCCGCGACCTGCGGCCCGACCGGGAGCTGGCGGCGCTGGT  
GAGCCTCGTCCCGCAGGAGGTGAAGGAACAGGGCTTGGAACGCCGGATGAGCCGGAG  
CGCTCCGGAGCTGCCGCCTGCAACGACCGGAGCTCGGCGGGGCGGCCACCTGGGGAGA  
AGGAGGAAGAGATACAAGACATCTCCAAGCAACTGAAAGGACTGCAGAGACCATCCTCC  
TCTTGAGGGAAGATCTCAGTAAACAAAGGAATATACATCTCAGATCAAAAGTCAGATTACT  
AAAGATTTCTGTTGCATGAAGGAATATGTTGAAAGACAGGAGAGAAACACACTGATGTTTCA  
TGAACAAGAGCGAAAAGCAGCCGAACAGAAAATTGAAGAGGCTATTACCAGCTCTGTGAT  
GAAGAGACCAAGCTCACAGACATCAAAGCCCAAACGAGTAACCTTACCTGGGAGACATGGG  
CACAAAGGCTCACCTTCAACCATGTATAAAATTACACTTGATGACAAGCTTAATGTTGTCAA  
AAGTGCTGTGGAAGATCTGAAGAAAACTTGGAATTCTACTTTTGGAGAAATATGCTCAGC  
AGTTCCCACCAGCCCAGCCTCCAGACTTATATCAGGAGGCAAGTGCCCTCCTCATTATCTCC  
AGAGTCAGCAGCTAAAGATCCAGAACCATTGTTTTCAAGTCCGTTTTCTCAGTGGGCAGAT  
GACGTGACTTTTGATCTCACAAGAGTATATGAGCGCTTAGCAATCACAGCCCAGAACAGGA  
AAGTAGTAGTTTCCAGCTACCCGCATGACTACGAACCATCGCCCAACAGATTCTGCATCAG  
CCAAGTGATGTGTTACAGAGCTTCTCTACCGGGTGCCACTACTGGGAAGTAGTTACCACG  
GGCAGTGATGGATGGGCTATCGGTGTTGCTCATGCAATGATTGGTAAAAGGGACAAGTTA  
GGAAGAACGGAGCATTCTGGTGTGTGGAATGGCTTGGTCCCAAACAGCAGCTGTCAGCC  
TGGCACAGGGATCAAGAAACACTATTACACAAGGATAAACCAAGTGAAGGTTGGAGTTTTCC  
TGGAGCTGCCAAAGCAGACTGTGTGCTTTTACTCCGTCTCTGACACAGAAATGCTTTTGCA  
TACTTTTGAATCAATACCTCAAATCCTCTTTACCCTGCTTTCTGGCTATATGCTCTAGAGAG  
AAATGGATCTTTAACGATAAGTCACACAACCCGGAGATAA

ATGGCTGCTGCTGCTGCCGTGCACCTCGAGCGGCTCCTGGGCGCCGTGGACCTGAGCTG  
CGCTTGCTGCCTGCAGCATTTACGGAGCCCGTGCGGCTCACGGGCTGCGGCCACAGCT  
TCTGCCGGGCTGCATCATGGAGTACTGCAAGGGCAGGCAGCGCGCCGGCTGCCCGCTC  
TGCCGGGAGGGCTTCGAGCTGAAGGACCTGCGGCCCAACCGGGAGCTGGCCGCTCTGGT  
GAACCTACTCCTGCAGGAGGTGAAGGAAGCAGAGTTGGAACACAGGAGGAACCCAGAC  
CCTCCGCAGCTGTTGCCTGCGACGCCCAGAGCTCAGCGGGGCGGCGACCTGGGGAGAA  
GGAAGAAGAGATATGGGACATCTCCAAGCAACTGGAAGTGA CTGCTGAGACCATCCACCT  
CTTGAGGAAAGATCTCAGTAAACGAAGGAATATGCATCTCAGATCAAAAGTCAGATTACTA  
AAGATTTCTGTTGCATGAAGGAATATGTTGAAACACAGGAGAGAAACACACTGAGGTT CAT  
TGAACAAGAGCAAAAAGCAACTCAACAGAAAATTGAACAGACCATTACACAGCTCTGTGTT  
GAAATGAACAGGCTTATAGACATCAAAGCCCAAATAAATAATTTACCTGAGAAACATAGGTA  
CAAAGGGTCACCTTCAACAATGGATAAAATTACACTTGATGAAAACTTAATGGGGTCAAAA

```
>upupa_epops-riple
```

>zapornia atra-riplet

ATGGCTGCAGCTGTGGACCTGGAGCGACTGCTGGGCGCCGTGGAACCTGATCTGCACTTG  
CTGCCTGCAGTACTTCACGGACCCGGTGCGGCTCTCGGGCTGCACGCACAGCTTCTGCC  
GGCCCTGCATCACCGCCTACTGCAAAGGCAGGCAGCGCGCCGGCTGCCCGCTCTGCCGG  
CAGGGCTTCGAGCTGAAGGACCTGCGGCCCAACCGGGAGCTGGCCGCTTTGGTGGACTT  
GATCCCGCAGGAAGTAAAGGAGAAAGAGCTGGAAACACGTAATGAACCGAAACCCACCGG  
AGCTGTTCCCTGCAGCGACCAGAGGGCGGCTGGTGGGCAGCTTGGGGAGAAGGAGGAA

GAGATATGGGACATCTCCAAGCAACTAGAAGTAACTCTGGAGACTATCCACCTCTTGAGGA  
AGGATCTCAGCACAGCAGAGGAATATGCAGCTCAGGTCCAAAGCCAGATTACTAAAGATTT  
CTGTTGCATGAAGGAGTATGTTGAAAGACAGGAGAGAAACACACTGATGTTCAATTGAACAG  
GAGCAAAAAGCAGCTCAACAGAAAAGTCGAAGTGACTATTAACCAGCTCTATGGTGAAGTGA  
ACAAGCTCATAGAGATCCAAGCCCAAATGAGTAACTTACCTGAGAGACATAGGTACAAAGG  
ATCACCTTCAACAATGAGTAAAATTACACTTCATGAGAAGCTTAATGGTGTCAAAAGTGCTG  
TAGAAGATCTTAAGAGAAAAGTTGGAAATTTTACTTTTGGAGAAATACGCTCAGCAGATCCCT  
CCAGTGCAGCCTTTGGATTTGGATCAAGAGACAGGTGTCTGCTCATTACCTCTGGAGACTG  
CAGCTGCAAGTCCAGAACCAGTGATTTCAAGCCAGTTTTCTCAGTGGGCAGATGATGTGAC  
CTTTGATCTCACAAGAGTATATGAGCGCTTAGCAATCACAGCCCAGAACAGGAAGGTAATG  
GTTTCCAGCTACCCAACTGACTATGGACCATCGCACAAACAGGTTCTGCATCAGCCAAAGTGA  
TGTGCTCACAGAGCTTCTCTACTGGATGCCACTACTGGGAAGTAATTACCAAGGACAGCGA  
TGGATGGGCTGTGGGAGTTGCTCATGGAATGATTGGTAAAAGGGACAAATTAGGGAGAAC  
AGGACATTCTGGTGCATAGAATGGCTGGGTCCCAAACAGCAGCTGTCAGCATGGCATAG  
GGATCAAGAAACAGTGTTACACAAGGATAAACCACAGAAGGTTGGAGTTTTGCTGGAGCTA  
CAAAAGAAGACAGTATCATTTTACTCCATCACTGACAAAGAAATGCTTTTGCATACATTTGA  
AATCAATACCTCAGTTCCTCTTTACCCTGCTTTCTGGCTGTATAATCTAGAAAGAAATGGGT  
CTTTAACTATAAGTGACACAAACAGGAGATAA

>zosterops\_lateralis-riplet

ATGGCCGCCGTATCGAGCTGGAGCGGCTGCAGAGCGTTCTGGACCTGCACTGCTGTTG  
CTGCCATCAGCTCTTCGCGGAGCCCGTGCGGCTCATGGACTGCGGCCACAGCTTCTGCC  
GGGGCTGCATCCTGCAGCACTGCGCGGGCCGCCCCGCGCCGCCTGCCCGCTCTGCCG  
GAGCGCCTTCGAGCCCCAGCACCTGCGGCCCAACCGCGAGCTGGCCGCGCTGCTCAGCC  
TCGTCCCGCGGGAGCTGGCGGAAAGGTTGAAACACAGGAGGAGCCGGAATCCTGTGGA  
GCTGCTGCCTGCAACGACCGGAGCTCGGCAAGGCGGAGACCTGGGGAGAAGGAGGAAG  
AGATATGGGAGAGCTCCAAGCAACAAGAAATAACTGAAGAAACCATCCACCTGTTGAGGAA  
AGATCTCGATAAAACAAAGGAATATACATCTCAGATCAAAAGCCAGATTATTAAGATTTCT  
ATTGCATGAAGGAATATGTTGAAAGACAGGAGAGAGAAACACACTGATGTTCAATTGAACAAGA  
GCAAAAAGCTGCTCAACAGAAAATTGAAGAGACTATTACCAGCTCACAGACATCAAAGCC  
CATCCTAGTGACTTATCTGAGAGGCAGAGGTACAAAGGCTCGCCTACAACAATTAATAAAA  
TTACGCTTGATGAGAAGCTTAATATTGTCAAAAGTGCTGTAGAAGATCTTAAGAGAAAATTG  
GAAATTTTACTCTTGAAGAATTATGCTCAGCAACTCCCACCAGTGACGCCTCCAGACTCAG  
ACCAGGAGCCAAGTGTCAGCTCATCATCTCCAGAGTCTGCAGCTGAAAGTCCTGCACCAA  
CCATTTCTAGCCAGTTTTCTCAGTGGGCAGCTGATGTGACTTTGGACTCCACAAGAGTGCA  
TGAACGCTTGGCACTCACAGCCCAGAACAGGAGAGTGATGGTTTTCAACCACCTGACCAC  
TTATCAACCATCACCCAAAAGGTTTTGCATCAGCCAAGTGATGTGTTACAGGGCTTCTCTA  
CTGGCTGCCACTACTGGGAAGTAATTACCAAGGACAGTGATGGATGGGCTGTTGGAGTTG  
CTCATGAAATGATTGGTAAAAGGGACAACTGGGAAGAACTGAGCATTCTGGTGTATAGA  
ATGGCTGGGTCCTAAAAAACAGCTGTCAGCATGGCATAAGAATCAAGAAACATTATTACAC  
AAGGACAAACCACTGAAGGTTGGAGTTTTCTGGAGCTACAAAAGAAGACTGTGTCATTTT  
ACTCCGCTCACTGACAAAGAAATGCTTTTGCACACCTTTGAAATCAGTACCTCAGATCTTCTC  
TACCCTGCTTTCTGGTTGTACACTCTAGAAAAAAATGGATCTTTAACTATAAGTCACCCAAA  
TAGGAAATAA
