# Supplementary material for: Dynamic Evolution of Avian RNA Virus Sensors: Repeated Loss of RIG-I and RIPLET
Source: MDPI journal article supplement (doi:10.3390/v15010003), 2022-12-20
Supplement: s1 [file s1]

## Cluster dendrogram with p-values (%)

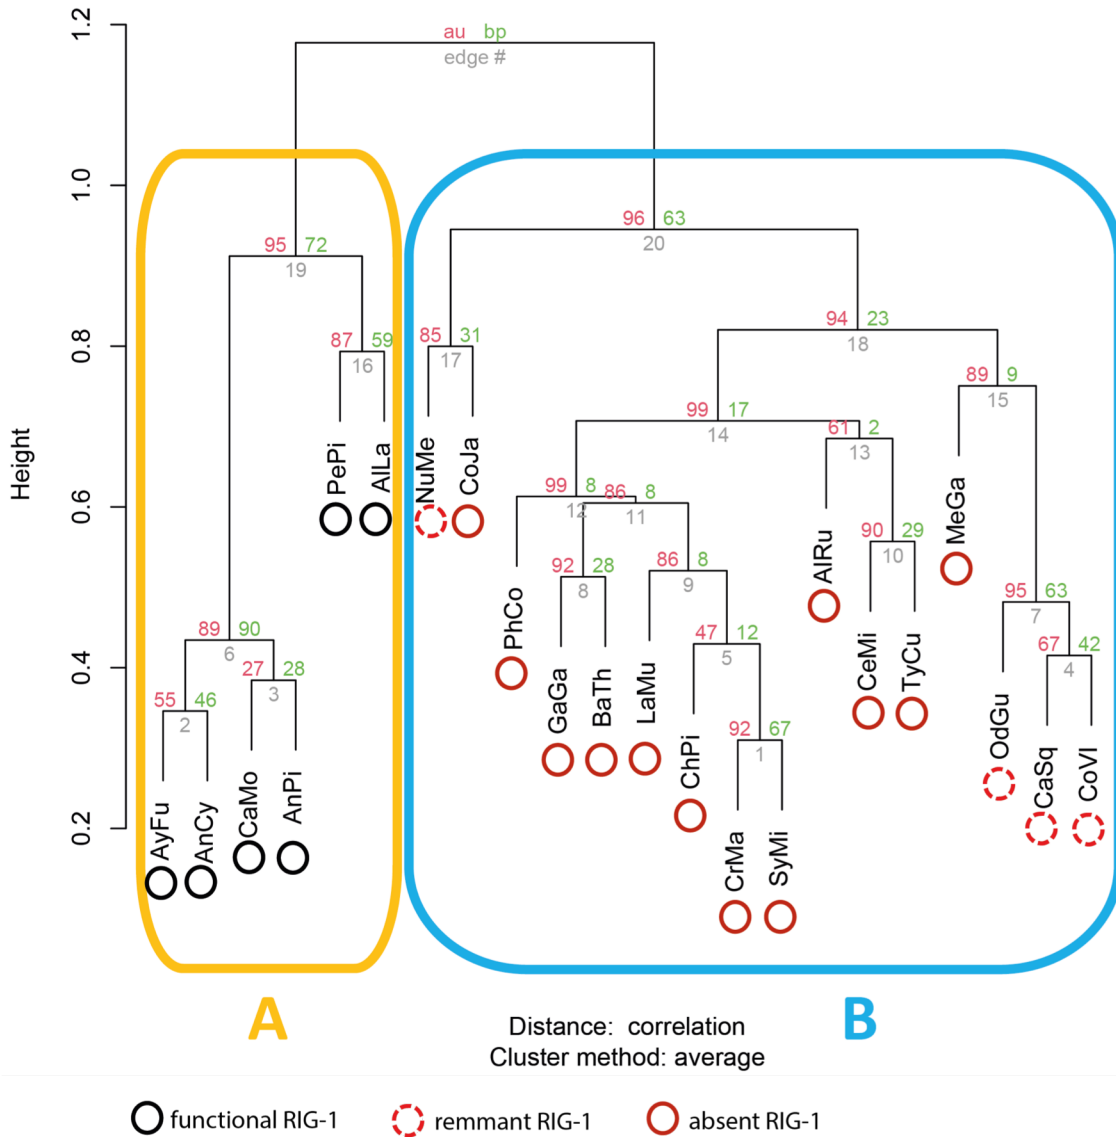

The hierarchical cluster analysis of surface electrostatic potential of MDA5 structure in Anseriformes and Galliformes. The uncertainty of each node is shown as Approximately Unbiased p-values (AU; red) and bootstrap probabilities (BP; green). The two major surface electrostatic potential clusters are marked with colors: A – orange and B – blue. The tips are labelled with the species name abbreviations: Alla – *Alectura lathamii*, AIRu – *Alectoris rufa*, AnCy – *Anser cygnoides*, AnPi – *Anas platyrhynchos*, AyFu – *Aythya fuligula*, BaTh – *Bambusicola thoracicus*, CaMo – *Cairina moschata*, CaSq – *Callipepla squamata*, CeMi – *Centrocercus minimus*, CoJa – *Coturnix japonica*, CoVi – *Colinus virginianus*, CrMa – *Crossoptilon mantchuricum*, GaGa – *Gallus gallus*, ChPi – *Chrysolophus pictus*, LaMu – *Lagopus muta*, MeGa – *Meleagris gallopavo*, NuMe – *Numida meleagris*, OdGu – *Odontophorus gujanensis*, PePi – *Penelope pileata*, PhCo – *Phasianus colchicus*, SyMi – *Syrnaticus mikado*, TyCu – *Tympanuchus cupido*. Presence/absence of RIG-1 gene is also shown.
