# Supplementary material for: Dynamic Evolution of Avian RNA Virus Sensors: Repeated Loss of RIG-I and RIPLET
Source: MDPI journal article supplement (doi:10.3390/v15010003), 2022-12-20
Supplement: s1 [file s1]

>upupa\_epops-upupiformes-mda5

ATGGCAGAGACGTCCCGAGACGAGCGTTTCCTCTACATGATCTCCTGCTTCAGAGCGCGG  
CTGAAGCGGTTTCATTCGGGTGCAGCCGGTGCTGGACCGGCTCCCCTTGCTCAGCGCCGA  
GGAGAAGGAGAAAAGTGCGGGCGGCCGCGGCGCAGCGGGGAGACGTGGCGGGGGCCGA  
GGAGCTGCTGCGGGCCGTGGAGCGGGGACCCCGCGGCTGCGGCTGGTTCCACGAGTTC  
CTGCAAGCACTGGAGTGCGGCGGCTGCAGCCTGGCAGCCTGCTACGTGAATCCCAGCCT  
CAGCCAACTGCCGTCGCCGGCCGAGGAGGCTGACCACGACCTCTGCGTGCACTTGGTGC  
AGCTGCTCCACAGCACGCTGGTGGATAGGATGCAGGCCGTACAGGTGGCCCAGAAGTGC  
CTGGAGATGGGCATCTTCCAGGAGGAAGACCTAGAGCGGATCTGTGCTGTTTCTGAGAAC  
CGTGGGAACAGAGATGGTGCAAGAGAGCTGTTGAGCAGAATAGTACAGAAGAAAGATTGG  
TTCTCTTCTTTTTTGCTTGCTCTGCGTGAAACCCAACACGGAGCCCTTGCAAGATGATTTAAG  
CGGAAATACAGGAGGAAAAGAAGATAGACAAAATGAAGTGAACAACAGTACAGACGAAGA  
AACAGAAGCTAGAAGTCAACCAGGATGTGCCGTAGGGGAAGATTTGAAACAGCAAGGAAA  
TGTGAATGATAATTTACCAGTGAGGACAGTGTTTTGGAACTTCTGTTAGTAAAAATTCTG  
CAGTTTCAGAGTCATATATCTTTCACAGGAGGTGGAAGTGTGAGTAACTTGAATGAAAACCT  
GACACAGAGCAGCTCAACCAGTGACTCAGATGAAGATGAAGTGGAGAGCAGAGAGCCACC  
TCAGCCGGAGCTGATCCTGAGAGATTACCAGATGGAAGTTGCAAAGCCAGCACTGAATGG  
GGAGAATATTATAATATGTCTCCCTACAGGCAGTGGTAAACTAGAGTGGCTGTTTACATTA  
CCAAAGATCACTTGGATAAGAAGAAAAGAGCATGTGAGCCTGGGAAAGTTATAGTACTTGT  
TAATAAGGTACCATTGGTAGAACAGCATTTACGAAAGGAGTTTAATCCATTCTGAAGCACT  
GGTATCGGGTTATTGGTTTAAGTGGTGACACTCAGCTGAAAATCTCATTTCTGAAGTTGTC  
AGAAGATACGACGTGATCATCAGTACAGCACAGATCCTCGAGAATTCTCTGTTAAAGGCAA  
CTGAAAAAGATGAAGAAGGTGTCCTCTTATCAGATTTTTCACTCATCATTATTGATGAGTGT  
CATCACACTCAAAAGGAAGGCGTCTACAACAATATAATGCGACGTTACTTAAAGAAAAGTT  
GAAGAACAGAAAGCTGGCAAAAGAAAACAAACCACTGATCCCACAGCCTCAGATTCTAGGA  
CTCACAGCCTCACCTGGTGTGCGGAGGTGCAACATCCCACACAAAAGCTGAACAACATATTT  
TGAAAATCTGTGCCAATCTTGATGCCTGTAGAATCATGACTGTTGAAGAGCACACGTCTCA  
ACTGAAGAACCAGGTGAAGGAACCATATAAGAAGACTGTGATTGCAGACGACAAAAGAAG  
CGATCCGTTTATAGAGAGCGAATTACTGAGATAATGACAGATATTCAAAATTATTGCCAGCTCC  
AGCCAAAATCTGAGTTTGGAAGCCAACCTTATGAACAGTGGGTGATTAGAGAAGAGAAGAG  
AGCTGCAAAAGAAGAGAAGCACAAAGGAACGTGTCTGTGCAGAACATCTGAAGAAATACAAT  
GATGCTCTTCAAATAAATGACACCATCCGAATGGTGGATGCGTACAATCTCCTGAATAACTT  
TTATAAGGAGGAGAAAACTAAGAAGACTGTGAGGAGTGATGATGATGATGAACCAGCAGTA  
TCAAAACAGGATGAAACATACGAATTTCTAATGGGTTTATTCCATTCAAAGAAGAAACAGCT  
GAAAGAGTTGGCTAGTAAGCCAGAATATGAGAATGAGAAGCTAGTAATGCTGCGAAACACT  
TTAATGGAGGAGTTCACAAAGACTGAAGAACCTAGAGGAATTGTTTTCACAAAGACGCGGC  
AAAGTGCCTTTTCTCTGTTCCAATGGATTAAAGATAACCCAAAATTTGAAGAAGTGGGAATT  
AAGGCCCATTTATCTCATCGGTGCTGGACATAACAGTGACACTAAACGCATGACCCAGAATG  
AGCAAAGGGGAAGTTATTGATAAATTCCGAAGTGGAATGTAAATTTACTTATCGCTACTACT  
GTCGCTGAGGAAGGCCCTAGATATCAAAGAGTGTAACATCGTTATTCGCTATGGCCTCATCA  
CCAATGAGATTGCTATGATGCAGGCTCGCGGTGAGCTCGAGCTGATGTGAGCACCTATG  
CACTTGTGGCTCCAAGTAACTCAAAGCTATTGTACGTGAAGATGTTAATATGTACCGTGAG  
AAAATGATGTATAAGGCCATTCAGCGTGTCCAGCAGATGCCAAAGGAAGACTATTTAAAGA  
AGATTCAGGCTTTCAGTTGCAAAGCATAGTGGA AAAACAAATGAAGGCAAAGAGAGATGA

GCGCAAAGCATACAAGAAAAACCCACTGCTGATAAAATTCCTATGCAAGAATTGCCACAAG  
CTGATAAGTTCTGGAGAAGACATACAAGTTATTGAAAACATGCATCATGTCAGTGTGAAGAA  
AGATTTCCAAAGTCTTTACCATACAAGAGAAAAATAAGACA-----

GACAATCACGCTGATTACCGGACGAATGCAGAAATTATATGTAAAGACTGCGGACAAGCTT  
GGGGAAATATGATGGTTCACCGAGGTCTTGATCTGCCTTGTCTAAAGATTAAGAATTTTGTG  
GTTGTGTTTGAAGACAAAAACCCAAACAAACAAATGTTTAAGAAATGGAATGAACTGAGCAT  
CAGATTCCCTTCTTTGATTATGCAGCAAATTGTCCTTCAAGTGATGAAGAT

>odontophorus\_gujanensis-galliformes-mda5

ATGTCCGAGGAGTGCCGAGACGAGCGCTTCCTCTACATGATCTCCTGTTTCAGGCAGCGG  
CTGAAGCGCTGCATCCGAGTGCAGCCGGTGCTGGACTGGCTGCCCTCGCTGAGCGCAGA  
GGAGAAGGAGAGGGTGCGTGCGGCGGCGCTGCAGCGCGGAGAGGTGGAGGGGGCCGA  
GGAGCTGCTGCGCGCCGTGGAGCGCGGACCCCGCGACCCCGGCTGGTTCACCGAGTTC  
CTGCTGGCGCTGGAGAAAGGCGGCTGCGACCTGGCCGTTTGCTACGTGAACCCT-----  
AGCCAGCTGCCCTCGCCCCGGGAGGAGGCCGACCACGATTTGTGCGTGCACCTGGTGCA  
GCTGTTGCACGGCACGCTGGTGGATAACATGCAGACCAGGCAGGTGGCCGAGAAGTGCC  
TGCAGTTGGGCATCTTCCAGGAGGAGGACATGATTCGGATTGATGCTGTTACTGACAGTCA  
TGGGAACAGAGAAGGTGCAAGGGAGCTGTTGAGCAGAATAGTGCAGAAGAAGGATTGGTT  
CTCTCAGTTTTTGGTTGCTCTGCGTGAAACTCAACATGAAAACCTTGCAGATGATTTAAGTG  
GAAATACAGGAGGAATAGAGGATAATGAAAATGAGTTGAAGGACAGTACAAGCAAAGAAAC  
AGAAGCTGCAAGCCAACCAGAACATGCTGCAAAGGAGGATCTGAAGCAGCAAGAAAATTT  
GGATGATAGCTTTGTCAGGGAGAGCAGTGTATTGGAACATCTGTTGGAAGAAGTCTGTA  
GTTTCAGAATCAGTTGTCACTGTAGGAGATACAAGTATCAGTAACTTGAATGAAAACCTGG  
GACAGAGCAGCACAACCAGTGATTCAGGTGAAGATGAAGCAGAAAGCAGAGCTTCACCTG  
AGCCAGATCTCATCCTGAGAGATTACCAGATGGAAGTTGCAAAACCAGCACTGGATGGGG  
AGAATATTATAATATGTCTCCCTACAGGCAGTGGCAAACCAGAGTGGCTGTTTACATTACC  
AAAGATCACCTGGATAAAAAAGAAAAAGCATCAGAGTCAGGAAAAGTTATAGTACTTGTTAA  
TAAGGTACCATTAGTGGAACAGCATTTACGAAGGGAGTTTAATCCATTCTGAAACGCTGG  
TATCGGGTTATTGTTTTAAGTGGTGATTCTGAGCTGAAAATTTCAATTCCTGAAAGTTGTCAG  
AAGAAACGATGTCATCATCTGTACTGCACAGATCCTGGAGAATTCAGTGTTAAATGCAACT--

-

GAAGACGATGAAGGTGTCCACTTGTCAGATTTTTCACTCATCATTATTGATGAATGCCATCA  
CACTCAAAAGGAAGGTGTTTATAACAACATAATGCGACGTTACTTAAAAGAAAAGATCAAAA  
ACAAAAAGCTGGCAAAAGAAAACAAACCTTTGATCCCGCAGCCTCAGATTCTGGGACTTAC  
AGCCTCACCTGGAGTTGGCGGTGCAAGAACCTACTCAAAGCTGAAGAACATATTCTGAAG  
ATCTGTGCCAATCTTGATGCATGCAAATCATGACTGTTACAGAGCATGCCTCCCAGCTGA  
AGGATCAGGTGAAGGAGCCATTTAAGAAGACTGTGATTGCAGATGACAAAAGAAGGGATC  
CATTTAGAGAAAGAATTATTGAAATCATGAAAGAGATTGAAAAATATTGCCAGCTATATCCA  
AAATCTGAGTTTGGCTCTCAACCATACGAACAGTGGGTGATTCTGGGAAGAGAGGAAAGCT  
GCAAAAGAAGAAAAACGTAAGGAACGCGTCTGTGCAGAACTTGAAGAAATATAATGATG  
CACTGCAAATTAATGATACCATCCGTATGGTTGATGCGTACAATCACCTAAATAACTTTTATA  
AGGAGCTGAAAAGGAAGAAGACAGTAGGGAGTGATGACGATGAAGAACCATTAGTATCAA  
AACAGGATGAAACAGACGAATTTCTATTAGGTTTATTTTCATGCAAAAAAGAAACAGCTGAAA  
GAATTGGCTAGAAAGCCAGAATATGACAATGAGAATCTAATGAAGCTGCGAAACACTTTAAT  
GGAAGAGTTCACAAAGACTGAAGAATCTAGAGGAATTATTTTCACAAAGACTCGGCAAAGT

GCCTTAGCTCTATACCACTGGATTATGGATAACCCAAAATTTGAAGAAGTGGGAATCAAAG  
CTCATTATCTTATTGGTGCTGGACACAATAGTGAAACTAAACCTATGACTCAGAATGAACAA  
AGGGAAGTCATTGATAAATTCCGAGTTGGAAGTATAAATTTACTTATTGCTACTACTGTAGC  
TGAGGAAGGCCTAGACATTAAAGAGTGTAACATTGTTATTCGTTATGGTCTGGTCACCAAT  
GAAATTGCTATGGTGCAGGCCCGTGGTCGAGCTCGAGCTGATGAAAGCACTTATGCACTT  
GTGGCTTCATGTGGCTCAGGAGCTGTGGAGCGCGAAGATGTGAATGTTTTCCGTGAAAAT  
ATGATGTATAAGGCCATTTCAGCGTGTCCAGAGGATGCCACCAGAAGAATATTTAAATAAGA  
TTCAGGACTTCCAGTTGCAAAGTGTAATGGAAAAACAAATGAAGGCAAAGAGAGATCAGCA  
TAAAACCTATAAGAAGAACCCTTCACTAATAACATTCCTGTGTAAGAATTGTCACAAGCTGA  
TATGTTCTGGAGAGGACATACAAGTTATTGAAAATATGCATCATGTCAGTGTAaaaaaAGAT  
TTCCACCATCTTTACCATAAAAGAGAAAAATAGGACACTGCAAGAAAAGCATGCTGATTACCA  
GACAAATGTGGAAATTATATGTAAAGATTGTGGACAAGCTTGGGGAAATATGATGGTTTATC  
GAGGTCTTGATCTGCCTTGTCTAAAAATTAGAACTTCGTGGTTGCTTTTGAAGACAAGAAA  
ACAAAAAAGGATATTGTCAAGAAATGGGGAGAACTGCCTGTCAGGTTTCCTGACTTTAATTA  
TTCAGCTCATTGTCCTTCAAGTGATGAAGAT

>callipepla\_squamata-galliformes-md5

ATGTCCGAGGAGTGCCGAGACGAGCGCTTCCTCTACATGATCTCCTGTTTCAGGCAGCGG  
CTGAAGCGCTGCATCCGAGTGCAGCCGGTGCTGGACTGGCTGCCCTCGCTGAGCGCGGA  
GGAGAAGGAGAGGGTGCGTGCTGCGGCGCAGCATCGCGGCGAGGTGGAGGGGGCCGA  
GGAGCTGCTGCGCGCTGTGGAGCGCGGCCCGCGGCCCGCGGCTGGTTCCCCGAGTTC  
CTGCTGGCGCTGAAGAAAGGCGGCTGCGACCTGGCCGCTTGCTACGTGAACCCT-----  
AGCCAGCTGCCCTCGCCCCGGGAGGAGGCCGACCACGATCTGTGCGTGACCTGGTGCA  
GCTGTTGCACGGCACGCTGGTGGATAACATGCAGACCAGGCAGGTGGCCGAGAAGTGCC  
TGCAGCTGGGCATCTTCCAGGAGGAGGACATGGTTCCGATTGATGCTGTTACTGACAGTC  
ATGGGAACAGAGAAGGTGCAAGGGAGCTGTTGAGTAGGATAGTGCAGAAGAAGGATTGGT  
TCTCTCAGTTTCTGGTTGCTCTGCGTGAAACTCAACATGAAAGCCTTGCAGATGATTTAAGT  
GGAAATACAGGAGGAATAGAGAATAAAGAAGATGACTTGAAGGACAGAACAAAGCAAAGAAA  
CAGAAGCTGCAAGCCAACCAGGACATGCTGCAAAGGAGGATTTGAAGCAGCAAGAAAATT  
TGGATGATAGCTTTGTCAGGGAGAGCAGTGTATTGAAACATCTGTTGAAAGAAGCTCTGT  
AGTTTCAGAATCAGTTATCGCTGTAGAAGATACAAGTGTGAGTAACTTGAATGAAAGCCTG  
GGACACAGCAGCACAAACAGTGATTTCAGGTGAAGATGAAGCAGAGAGCAGAGCTTCACCT  
GAGCCAGATCTCACCTGAGAGATTATCAGATGGAAGTTGCAGAACCAGCGCTGAATGGG  
GAGAATATTATAATATGTCTCCCTACAGGCAGTGGCAAAACCAGAGTGGCTGTTTACATTAC  
CAAAGATCACTTGGATAAAAAGAAAAATAGCATCAGAGTCGGGAAAAGTTATAGTACTTGTTA  
ATAAGGTACCGTTAGTGGAACAGCATTTACGAAGGGAGTTTAATCCATTCTGAAACGCTG  
GTACCGGGTTATTGGTTTAAGTGGTGATTCTGAGCTGAAAATTTCAATTCCTGAAGTTGTCA  
GAAGAAATGATGTCATCATCTGTACTGCACAGATCCTGGAGAATTCAGTGTTAAATGCAACT

---

GAAGACGATGAAGGTGTCTACTTGTGAGATTTTTCACTCATGATTATTGATGAATGCCATCA  
CACTCAAAAGGAAGGTGTTTACAACAACATAATGCGACGTTACTTGAAAGACAAGATCAAG  
AACAGAAAGCTGGCAAAAGAAAACAAACCTTTGATCCCGCAGCCTCAGATTCTGGGACTTA  
CAGCCTCACCTGGAGTTGGTGGTGCAAGAACCTACTCAAAGCTGAAGAACATATTCTGAA  
GATTTGTGCCAATCTTGATGCATGCAAAATCATGACTGTTATAAAGCATGCCTCCCAGCTGA  
AGGATCTGGTGAAGGAGCCATTTAAGAAGACTGTGATTGCAGATGACAAAAGAAAGGATCC

GTTTAGAGAAAGAATTATTGAGATCATGAAAGAGATTGAAAAATATTGCCAGCTCTATCCAA  
AATCTGAGTTTGGCTCTCAACCATATGAGCAGTGGGTGATTCGGGAAGAGAGGAAAGCTG  
CAAAAGAAGAAAAACGCAAGGAACGCGTCTGTGCAGAACACTTGAAGAAATATAATGATGC  
ACTGCAAATTAATGATACCATCCGTATGGTTGATGCATACAATCACCTAAATAACTTTTATAA  
GGAGCTGAAAAGGAAGAAGACAGTAGGGAGTGATGACGATGAAGAACCAATAGTATCAAA  
ACAGGATGAAACAGATGAATTTCTATTAGGTTTATTTTCATGCAAAAAAGAAACAGCTGAAAG  
AGTTGGCTAGAAAGCCAGAATATGACAATGAGAAGCTAATGAAGCTGCGAAACACTTTAAT  
GGAAGAGTTCACAAAGACTGAAGAATCTAGAGGAATTATTTTCACAAAGACTCGGCAAAGT  
GCCTTAGCTCTATACCACTGGATTATGGATAACCCAAAATTTGAAGAAGTGGGAATCAAAG  
CTCATTATCTTATTGGCGCTGGACACAATAGTGAAACTAAACCTATGACTCAGAATGAGCAA  
AGGGAAGTCATTGATAAGTTCCGAGTTGGAAGTATAAATTTACTTATTGCTACTACTGTAGC  
TGAGGAAGGCCTAGACATTAAGAGGTGAACATTGTTATTCGCTATGGTCTGGTCACCAAT  
GAAATTGCTATGGTGCAGGCTCGTGGTAGAGCTCGAGCTGATGAAAGCACTTATGCACTTG  
TGGCTTCGTGTGGCTCAGGAGCTGTGGAGCGCGAAGATGTGAATGTTTTCCGTGAAAATAT  
GATGTATAAGGCCATTCAACGTGTCCAGAGGATGCCACCAGAAGAATATTTAAATAAGATT  
CAGGACTTCCAGTTGCAAAGTGTAAGTGGAAAACTAATGAAGGCAAAGAGAGATCAACATA  
AAACATATAAGAAGAACCCTTCACTAATAACATTCCCTATGTAAGAATTGTCACAAGCTGATAT  
GTTCTGGAGAGGACATACAAGTAATTGAAAATATGCATCATGTCAGTGTAAAAAAGATTTC  
CAACATCTTTACCATAAAAAGAGAAAATAGGACACTGCAAGATAAGCATGATGATCACCAGA  
CAATGTGGAAATTATATGTAAAGATTGTGGACAAGCTTGGGGAAATATGATGGTTTATCGA  
GGTCTTGATCTGCCTTGTCTAAAAATTAGAAATTTCTGGTTGCTTTTGAAGACAAGAAAAC  
AAAAAAGGATATTGTCAAGAAATGGGGAGAAGTGCCTGTCAGGTTTCCTGACTTTAATTAT  
GCAGCTCATTGTCTTCAAGTGATGAAGAT

>colinus\_virginianus-galliformes-mda5

ATGTCCGAGGAGTGCCGAGACGAGCGCTTCCTCTACATGATCTCCTGTTTCAGGCAGCGG  
CTGAAGCGCTGCATCCGAGTGACGCCGGTGCTGGACTGGCTGCCCTCGCTGAGCGCGGA  
GGAGAAGGAGAGGGTGCGTGCTGCGGCACAGCAGCGCGGCGAGGTGGAGGGGGCCGA  
GGAGCTGCTGCGCGCTGTGGAGCGCGGCCCCCGCGGCTCCGGCTGGTTCCCCGAGTTC  
CTGCTGGCGCTGAAGAAAGGCGGCTGCGACCTGGCCGCTTGCTACGTGAACCCT-----  
AGCCAGCTGCCCTCGCCCCGGGAGGAGGCCGACCACGATCTGTGCGTGACCTGGTGCA  
GCTGTTGCACGGCACGCTGGTGGATAACATGCAGACCAGGCAGGTGGCCGAGAAGTGCC  
TGCAGCTGGGCATCTTCCAGGAGGAGGACATGGTTCCGATTGATGCTGTTACTGACAGTC  
GTGGGAACAGAGAAGGTGCAAGGGAGCTGTTGAGTAGGATAGTGCAAGAAGGATTGGT  
TCTCTCAGTTTCTGGTTGCTCTGCGTGAAACTCAACATGAAAGCCTTGACAGATGATTTAAGT  
GGAAATACAGGAGGAATAGAGAATAAAGAAGATGACTTGAAGGACAGAACAAAGCAAAGAAA  
TGGAAGCTGCAAGCCAACCAGGACGTGCTGCAAAGGAGGATTTGAAGCAGCAAGAAAATT  
TGGATGATAGTTTTGTCAGGGAGAGCAGTGTATTGAAACATCTGTTGGAAAGAACTCTGT  
AGTTTCAGAATCAGTTATCGCTGAAGGAGATACAAGTGTCAGTTACTTGAATGAAAGCCTG  
GGACACAGCAGCACAAACCAGTGATTCAGGTGAAGATGAAGCAGAGAGCAGAGCTTCACCT  
GAGCCAGATCTCATCCTGAGAGATTATCAGATGGAAGTTGCAGAACCAGCGCTCAATGGG  
GAGAATATTATAATATGTCTCCCTACAGGCAGTGCCAAAACCAGAGTGGCTGTTTACATTAC  
CAAAGATCACTTGGATAAAAAGAAAATAGCATCAGAGTCAGGAAAAGTTATAGTACTTGTTA  
ATAAGGTACCGTTAGTGGAACAGCATTTACGAAGGGAGTTTAATCCATTCTGAAACGCTG  
GTACCGGGTTATTGGTTTAAGTGGTGATTCTGAGCTGAAAATTTCAATTCCTGAAGTTGTCA

GAAGAAATGATGTCATCATCTGTACTGCACAGATCCTGGAGAATTCACTGTAAATGCAACT

---

GAAGACGATGAAGGTGTCTACTTGTCTAGATTTTTCTACTCATGATTATTGATGAATGCCATCA  
CACTCAAAAGGAAGGTGTTTACAACAACATAATGAGACGTTATTTGAAAGACAAGATCAAGA  
ACAGAAAGCTGGCAAAAGAAAACAAACCTTTGATCCACAGCCTCAGATTCTGGGACTTAC  
AGCCTCACCTGGAGTTGGTGGTGCAGAACCTACTCAAAAGCTGAAGAACATATTCTGAAG  
ATTTGTGCCAATCTTGATGCATGCAAAATCATGACTGTTATAAAGCATGCCTCCCAGCTGAA  
GGATCTGGTGAAGGAGCCATTTAAGAAGACTGTGATTGCAGATGACAAAAGAAAGGATCCA  
TTTAGAGAAAGAATTATTGAGATCATGAAAGAGATTGAAAAATATTGCCAGCTCTATCCAAA  
ATCTGAGTTTGGCTCTCAACCATACGAACAGTGGGTGATTCGGGAAGAGAAGAAAGCTGC  
AAAAGAAGAAAAACGCAAGGAGCGTGTCTGTGCAGAACTTGAAGAAATATAATGATGCT  
CTGCAATTAATGATACCATTCGTATGGTTGATGCGTACAATCACCTAAATAACTTTTATAAG  
GAGCTGAAAAGGAAGAAGACAGTAGGGAGTGATGACGATGAAGAACCAATAGTATCAAAA  
CAGGATGAAACAGATGAATTTCTATTAGGTTTATTTTCATGCAAAAAAGAAACAGCTGAAAGA  
GTTGACTAGAAAGCCAGAATATGACAATGAGAACTAATGAAGCTGCGAAACACTTTAATG  
GAAGAGTTCACAAAGACTGAAGAATCTAGAGGAATTATTTTCACAAAGACTCGGCAAAGTG  
CCTTAGCTCTATACCACTGGATTATGGATAACCCAAAATTTGAAGAAGTGGGAATCAAAGCT  
CATTATCTTATTGGTGTCTGGACACAATAGTGAACTAAACCTATGACTCAGAATGAGCAAAG  
GGAAGTCATTGATAAATTCGAGTTGGAAGTATAAATTTACTTATTGCTACTACTGTAGCTG  
AGGAAGGCCTAGACATTAAAGAGTGTAACATTGTTATTCGCTATGGTCTGGTCACCAATGA  
AATTGCTATGGTGCAGGCTCGTGGTGCAGCTCGAGCTGATGAAAGCACTTACGCACTTGT  
GGCTTCAAGTGGCTCAGGAGCTGTGGAGCGCGAAGATGTGAATGTTTTCCGTGAAAATAT  
GATGTATAAGGCCATTCAACGTGTCCAGAGGATGCCACCAGAAGAATATTTAAATAAGATT  
CAGGACTTCCAGTTGCAAAGTGTAAGTGAAAACTAATGAAGGCAAAGAGAGATCAACATA  
AAATATATAAGAAGAACCCTTCACTAATAACATTCCTATGTAAGAATTGTCACAAGCTGATAT  
GTTCTGGAGAGGACATACAAGTAATTGAAAGTATGCATCATGTGAGTGTAAGAAAAAGATTTT  
CAACATCTTTACCATAAAAGAGAAAAATAGGACACTGCAAGATAAGCATGATGATCACCAGA  
CAATGTGGAAATTATATGTAAAGATTGTGGACAAGCTTGGGGAAATATGATGGTTTATCGA  
GGTCTTGATCTGCCTTGTCTAAAAATTAGAAATTTCTGGTTGCTTTTGAAGACAAGAAAAC  
AAAAAAGGATATTGTCAAGAAATGGGGAGAAGTGCCTGTCAGGTTTCTGACTTTAATTAT  
GCAGCTCATTGTCCTTCAAGTGATGAAGAT

>gallus\_gallus-galliformes-md5

ATGTCGGAGGAGTGCCGAGACGAGCGCTTCCTCTACATGATCTCCTGCTTCAGGCCGCGG  
CTGAAGCGCTGCATCCGGGTGCAGCCGGTGCTGGACTGGCTGCCCTCGCTGAGCGCAGA  
GGAGAAGGACAAGGTGCGGGCGGCCGCGCTGCAGCGCGGCGAGGTGGAGGGGGCCGA  
GGAGCTGCTATGCGCCGTGGAACGTGGCCGCGCGACCCCGGATGGTTCACTGAATTCC  
TGCTGGCGCTGAAGAAAGGCGGCTGTGACCTGGCCGCTTGCTACGTGAACCCC-----  
AGCCAGTTGCCCTCGCCTCAGGAGGAGGACGACCACGATCTCTGTGTGCACTTGGTGCAG  
CTGCTGCACGGCACGCTGGTGGATAACATGCAGACCAGACAGGTGGCCGAGAAGTGTCT  
GGAGCTGGGCATCTTCCAGGAGGAGGACCTGGTTGGGATTGAGACTGTTATTGAGAGTCG  
TGGGAACAGAGACGGTGCAAGGGAGCTGTTGAGCAGAATAGTGCAGAAGAAGGACTGGTT  
CTCTCAGTTTTTGGTTGCTCTGCGAGAAACCCAACATGAAAGCCTTGCAGATGACTTAAGT  
GGAAATACAGGAGGAACAGAGGATAAAGACTATGAGTTGAAGAACACACAGGCAAAAAA  
CAGAAGCTGCAAGCCAACCAGTATAT---

GTAACGGAGGATTTGAAACAGCAAGAAAATTTGGATGACAGTTTTGTCAGAGAGAGCAGTG  
TATTGGAAACATCTGTTGGAAAGAACTCTGTAATTTCAGAATCA---  
GTTGCTGTAGGAGATGCAAGTGTCACTAACTCGAACGAAAACCTGGGACAGAGCAGCACG  
ACCAGTGATTCAGGTGAAGATGAAGCAGAGGGCAGAGCTTCACCTGAGCCAGATCTCACC  
CTGAGAGATTACCAGATGGAAGTTGCAAAACCAGCACTGAATGGGGAGAATATTATAATAT  
GTCTCCCTACAGGCAGTGGCAAAACCAGAGTGGCTGTTTACATTACCAAAGATCACTTGGA  
TAAGAAGAGAAAAGCATCAGAGCAAGGAAAAGTTATAGTACTTGTTAATAAGGTACCGTTA  
GTGGAACAGCATTTACGAAAGGAGTTTAATCCATTCTGAAACACTGGTATCAAGTTATTGG  
CTTAAGTGGTGATTCTGAGCTGAAAATCTCGTTTCTGAAAGTTGTCAAAAGATATGATGTCA  
TCATCTGTACAGCACAGATCCTGGAGAATTCAGTCTGCTAAATGCAACTGAAGAAGATGAA---  
AGTGTCCGCTTGTCAGATTTTTCTACTCATCATTATTGATGAGTGCCATCACACTCAAAAGGA  
AGGTGTTTACAACAATATCATGCGACGTTACTTAAAAGAAAAGATCAAGAACAGAAAAGCAG  
GCAAAAGAGAAACAAACCTTTGATTCCACAGCCGCAGATTCTGGGACTTACAGCCTCACCTG  
GAGTTGGAGGTGCAAGATCCAACCTCAAAAGCTGAAGAACATATTCTGAAAATCTGTGCCAA  
TCTTGATGCATGCAGAATCATGACTGTTAAAGAGCATGCATCCCAACTGAAGAATCAGGTG  
AAGGAACCATTTAAGAAGACTGTGATTGCAGATGACAAAAGAAGGGATCCATTTAGAGAAA  
GAATTATTGAGATCATGCAAGATATTCAAAAATATTGCCAGCTCTATCCAAAATCTGAGTTT  
GGATCTCAGCCATATGAACAGTGGGTGATTAGGGAAGAGAGAAGAGCTGCAAAAGAAGAA  
AAACGCAAGGAACGTGTCTGTGCAGAACACTTGAAGAAATATAATGATGCTCTGCAAATTA  
ATGATACCATTGCAATGGTTGATGCATACAATCACCTAAATAACTTTTATAAGGAGCTAAAA  
AGGAGGAAGACAGCGGAGAGTGATGATGATGAAGAACCATTAGTATCAAAACAGGATGAA  
ACAGATGAATTTTTAATGCGTTTATTTTCATGCAAAAAAGAAACAACTGAAAGAGTTGGCTAG  
AAAACCAGAATATGACAATGAGAAGCTAATGAAGCTCCGGAATACTTTAATGGAAGAGTTC  
ACAAAGACTGAAGAACCTAGAGGGATTATTTTCACGAAGACTCGACAAAGTGCCTTAGCTT  
TATACCACTGGATTATGGATAATCCAAAATTTGAAGAAGTGGGAATCAAAGCTCATTTTCTT  
ATTGGTGCTGGACACAATAGTGAAACTAAACCTATGACTCAGAATGAGCAAAGGGAAGTCA  
TTGATAAATTCCGAGGTGGAAGTATAAATTTACTTATTGCTACTACTGTAGCTGAGGAAGGC  
CTAGACATCAAAGAGTGTAACATTGTTATTCGCTATGGTCTGGTCACCAATGAAATTGCTAT  
GGTGCAGGCCCGGGGTGAGCTCGAGCTGATGAGAGCACTTATGCACTTGTGGCTTCAAG  
TGGCTCAGGAGCTGTTGAACGTGAAGATGTAAATATTTTCCGTGAAAATATGATGTATAAGG  
CCATTGACGTGTCCAAGAGATGCCGCCAGAAGAGTATTTAAATAAGATTCAGGACTTCCA  
GTTGCAAAGCATAGTGGA AAAACAAATGAAGGCAAAGAGAGATCAGCGTAAGACATATAAG  
AAAAACCCTTCACTAATAACATTCTGTGCAAGAATTGCCACAAGTTGATATGTTCTGGAGA  
AGATATACAAGTTATTGAAAATATGCATCATGTGAGTGTGAAAAAAGATTTCCAACATCTTTA  
CCATAAAAGAGAAAACAGGACATTGCAAGACAAGCATGCTGATTACCAGACAAACGTGGAA  
ATTATATGTAAAGATTGTGGACAAGTTTGGGGAAATATGATGGTTTATCGAGGTCTTGACCT  
GCCTTGTCTAAAGATTAGAAATTTTGTGGTTGCTTTTGAAGACAAGAAAACAACAAAGGAAA  
TTTTCAAGAAATGGGGAGAACTGCCCATCATATTTCTGATTTTGATTATGCATCTCATTGT  
CCTTCAAGTGATGAAGAT

>numida\_meleagris-galliformes-mda5

ATGTCGGAGGAGTGCCGAGACGAGCGCTTCCTCTACATGATCTCCTGCTTCAGGCCGCGG  
CTGAAGTGCTGCATCCGCGTGCAGCCGGTGCTGGACTGGCTGCCCTCGCTGAGCGCAGA  
GGAGAAGGAGAGGGTGCGGGCGGCAGCGCTGCAGCGCGGCGAGGTGGAGGGGGCCGA  
GGAGCTGCTGCGCGCCGTGGAGCGCGGCCCCCGTGGCCCCGGCTGGTTCCATGAGTTC

CTGCTGGCGCTGAAGAAAGGCGGCTGCGACCTGGCCGCTTGCTACGTGAACCCC-----  
AGCCAGCTGCCCTCGCCCCGGGAGGAGGCCGACCATGACCTCTGCGTGACCTGGTGCA  
GCTGCTGTACGGCACGCTGGTGGATAACATGCAGACCAGGCAGGTGGCCGAGAAGTGCC  
TGCAGCTGGGCATCTTCCAGGAGGAGGACCTGGGTTCGGATTGATGCTGTTACTGACAGTC  
ATGGGAACAGAGGTGGTGCAAGGGAAGTGTGAGCAGAATAGTGCAGAAGAAGGATTGGT  
TCTCTCCGTTTTTGAAGTCTGCGTGAAACTCAACATGAAAGCCTTGCAGATGATTTAAGT  
GGAAATACAGGAGGAACAGAGAATGAAGAAAATGAGTTGAAGAATAGTACAAGGAAAGAAA  
CAGAAGATGCAAGCGAACCAGGATATGCTGTAATGGAGGATATGAAACAGCAAGAAAATCT  
GGATGATAGTTTTGTGAGAGAGAACAGTGTATTGGAAACATCTATTGGAAAGAGCTCTGAA  
GTTTCAGAATCAGTTGTGCTGTAGGAGGTGCAAGTGTCAGTAACTTGAATGAAAACCTGG  
GACAGAGCAGTGCGACCAAGTATTGAGGTGAAGATGAAGCGGACAGCAGAGCTTCACCTG  
AGCCAGATCTCATCTGAGAGATTACCAGATGGAAGTTGCAAAACCAGCACTGAATGGGG  
AGAATATTATAATATGTCTCCCTACAGGCAGTGGCAAACTAGAGTGGCTGTTTACATTACC  
AAAGATCACTTGGATAAGAAGAAAAAAGCATCAGAGCCAGGAAAAGTTATAGTACTTGTTAA  
TAAGGTACCGTTAGTGAACAGCATTTACGAAAGGAGTTTAATCCATTCTGAAACGCTGG  
TATCAGGTTATTGGTTTAAAGTGGTGATTCTGAGCTGAAAATCTCATTTCCTGAAGTTGTCAA  
AAGAAATGATGTCATCATCTGTACAGCACAGATCCTGGAGAATTCAGTGTAAATGCAACTG  
AAGAGGATGAA---  
GGTGTCCGCTTGTCAGATTTTTCACTCATCATTATTGATGAGTGCCATCACACTCAAAAGGA  
AGGTGTTTACAACAATATAATGCGACGTTACTTAAAAGAAAAGATCAAGAACAGAAAGCTGG  
CAAAAGAAAACAAACCTTTGACTCCGCAGCCTCAGATTCTGGGACTTACAGCCTCACCTGG  
AGTCGGAGGTGCAAGAACCAACTCAAAAGCTGAAGAACATATTCTGAAAATCTGTGCCAAT  
CTTGATGCATGCAGAATAATGACTGTTAAAGAGCATGCCTCCCAACTGAAGAATCAGGTGA  
AGGAGCCATTTAAGAAGACTGTGATTGCAGATGACAAAAGAAGGGATCCATTTAGAGAAAG  
AATTATTGAGATCATGAAAGACATTCAAAAATATTGTCAGCTTTATCCAAAATCTGAGTTTGG  
ATCTCAGCCATATGAACAATGGGTTGTTAGGGAAGAGAAAAGAGCTGCAAAAAGAAGAAAA  
CGCAAGGAACGTGTCTGTGCAGAACACTTGAAGAAATATAATGATGCACTCCAAATTAATG  
ATACCATTTCGAATGGTTGATGCATACAATCACCTAAATAACTTTTATGAGGAGCTAAAAAGG  
AAGAAGACAGTAGAGAGTGATGATGATGAAGAACCCTTAGTATCAAAACAGGATGAAACAG  
ATGAATTTTTAATAGGTTTATTTTCATGCAAAAAGAAACAGCTGGAAGAGTTGGCTAGAAAG  
CCAGAATATGACAATGAGAAGCTAATGAAGCTGCGAAACACTTTAATGGAAGAGTTCACAA  
AGACTGAAGAATCTAGAGGAATTATTTTCACAAAGACTCGGCAAAGTGCCTTAGCTCTATAC  
CACTGGATTATGGATAACCCAAAATTTGAAGAAGTGGGAATCAAAGCTCATTATCTTATTGG  
TGCTGGACAGAATAGTGAAACTAAACCTATGACTCAGAATGAGCAAAGGGAAGTCATTGAT  
AAATCCGAGGTGGAAGTATAAATTTACTTATTGCTACTACTGTAGCTGAGGAAGGCCTAGA  
CATCAAAGAGTGTAACATTGTTATTCGCTACGGTCTGGTCACCAATGAAATTGCTATGGTAC  
AGGCCCGTGGTCGAGCTCGAGCTGATGAGAGCACTTATGCACTTGTGGCTTCATGTGGCT  
CAGGAGCTGTTGAACGCGAAGATGTAAATATTTTCCGTGAAAATATGATGTATAAGGCCATT  
CAGCGTGTCCAGGAGATGCCGCCTGACAAGTATTTAGATAAGATTCAGGGCTTCCAGTTGC  
AAAGTATAGTAGAAAAACAAATGAAAGCAAAGAGAGATCAGCGTAAGACATACAAGAAAA  
CCCTTCACTAATAAAATTCCTATGCAAGAATTGCCACAAGCTGATATGTTCTGGAGAAGATA  
TACAAGTCATTGAAAATATGCATCATGTGAGTGTGAAGAAAGATTTCCAACATCTTACCAT  
AAAAGAGAAAATAAGACACTGCAAGATAAGCATGCTGATTACCAGGCAAATGTGGAAATTA  
TATGTAAAGATTGTGGACAAGCTTGGGGAAATATGATGGTTTATCGAGGACTTGACCTGCC

TTGTCTAAAGATTAGAAATTTTGTGGTGGCTTTTGAAGACAAAAAATAACAAAGGAAATTTT  
CAAGAAATGGGGAGAACTACCCATCAGTTTTCTGATTTTGATTATGCAGCTCATTGTCCTT  
CAAGTGATGAAGAT

>penelope\_pileata-galliformes-md5

ATGTCGGAGGAGTGCCGAGACGAGCGCTTCCTCTACATGATCTCGTGCTTCAGACCGCGG  
CTGAAGCGGTGCATCCGGGTGCAGCCGGTGCTGGACTGGCTGCCCTCGCTGCGCGCGGA  
GGACAAGGAGAGGGTGCGGGTGGCAGCTCTGCAGCGCGGCGAAGTGAGAGGGGGCCGAG  
GAGCTGCTGCGCGCCGTGGAACGCGGCCCCACGGCCCCGGCTGGTTCCCTGAGTTCCT  
GCAGGCGCTGGAGAGGGGCGGCTGCGACCTGGCTGCCTGCTACGTGAACCCAGCCTCA  
GCCAGCTGCCCTCTCCAGCGAGGAGGCCGAGCACGACCTATGCGTGCACTTGGTGCAG  
CTGCTGCATGGCACGCTGGTGGATAGGATGCAGCCAGGCAGGTGGCCGAGCAGTGCCT  
GGAGATGGGCATCTTCCAGGAGGAGGATCTGGTTCGGATTGATGCTGTTATTGACAACCAT  
GGGAACAGAGATGGTGCAAGGGAGCTGTTGAGCAGAGTAGTGCAGAAGAAGGATTGGTTC  
TCTCCTTTTTTGTCTGCTCTGCGTAGAACCCAACATGAAGGCCTTGCAGATGATTTAAGCG  
GAAATACAGGAGGAACAGAGAATAAAGAAAATGAGATGAAGAACAGTACAAGCAAAGAAGC  
AGAAGATGCAAGCCAACCAGGACATGTCATAGTGGAAGATTTGAAACAGCAAGAAAATTTG  
GATGATAGTTTTGTGAGAAAGAACTGTATTGGAAACATCTGTTGGAAAGAACTCTATAGT  
TTCAGAATCAATTGTCACTGCAGGAGATGGAAGTGTGAGTAGCTTAAATGAAACCTGGGA  
CAGAGCAGCACAAACCAGTGATTCAGATGAAGATGAAGTAGAGAGAAGAGCTTCACCTGAG  
CCAGAGCTGATCCTGAGAGATTACCAGATGGAAGTTGCAAAGCCAGCACTGAATGGGGAG  
AATATTATAATATGTCTCCCTACAGGCAGTGGCAAACACAGATTGGCTGTTTATATTACCA  
AGATCACTTGGATAAGAAGAAAAAGCATCAGAGCCTGGAAAAGTTATCGTACTTGTTAACA  
AGGTACCATTAGTGGAACAGCATTTACGAAAGGAGTTTAAATCCATTCTGAAACGTTGGTAT  
CAGGTTATTGGGTTAAGTGGTGATTCTCAGCTGAAAATCTCATTTTCATGAAGTTGTCAGAAG  
AAGTGATGTCATCATCTGTACAGCACAGATCCTGGAGAATTCAGTGTAAATGCAACTGAA  
GAAGGTGAAGAAGGTGTCCATTTATCAGATTTTTCACTCATCATTATTGATGAGTGTGATCA  
CACCCAAAAAGAAGGTGTCTACAACAATATAATGCGACGTTATTTAAAACAAAAGATCAAGA  
ACAGAAAGCTGGCAAAAGAAAACAAACCTCTGATTCCACAGCCTCAGATTCTGGGACTTAC  
AGCCTCACCGGGAGTAGGAGGTGCAAGAAACAACGCAAAAGCTGAAGAACATATTCTGAA  
AATCTGTGCCAGCCTTGATGCACGCAGAATCATGACTGTAAAGAGCATGCCTCCCAACTG  
GAGAATCAGGTGAAGGAACCATTTAAGAAGACTGTGATTGCAGATGACAAAAGAAGGGATC  
CATTTAGAGAAAGAATTATTGAGATCATGACAGAAATTCAAAACCTATTGCCAGCTCTATCCA  
AAATCTGAGTTTGGATCTCAGCCTTATGAACAGTGGGTGGTTAGAGAAGAGAAAAAGCTG  
CAAAAGAAGAAAAACGCAAGGAACGAGTCTGTGCAGAACACCTGAAGAAATATAATGATGC  
TCTGCAAATCAGTGACACCATCAGAATGGTCGATGCGTACAATCACCTAAACAACTTTTATA  
AGGATTTAAAAGCAAGAAGACAGTAGAGAGTGATGATGATGAAGAGCCAGTAGTACTAAA  
ACAGGATGAAACAGATGAATTTCTAATAAATCTATTTTCATGCAAAAAAGAAACAGCTGAAAG  
AGTTGGCTAGAAAGCCAGAATATGAAAATGAGAAGCTACTGAAGTTGCGAAACACTTTAAT  
GGAGGAGTTCACAAAGACTGAAGAATCTAGAGGAATTATTTTCACAAAGACTCGGCAAAGT  
GCCTTTGCTCTGTTCCAGTGGATTACGGATAACCCAAAATTTAAAGAAGTGGGAATTAAG  
CTCATTACCTTATTGGTGCTGGACACAACAGTGAACTAAACCTATGACTCAGAATGAACAA  
AGGGAAGTCATCGATAAATTCCGAGGTGGAAGTGTAATTTACTTATCGCTACTACTGTAG  
CTGAGGAGGGCCTAGACATCAAAGAGTGTAACGTTGTTATTGCTATGGTCTGGTCACAAA  
TGAAATTGCTATGATGCAGGCCCGTGGTCGAGCTCGATCCAGTGAGAGCACCTATGCACT



TGTGGCTTCAGCTGGCTCAGGAGCTGTTGAACGTGAAGATGTAAATATGTTCCGTGAGAAA  
ATGATGTATAAGGCAATTCAACGTGTCCAGAACATGCCGCCAGAAGAGTATTTAGATAAGA  
TTGAAGACTTACAGTTGCAAAGTATAATGGAAAAGCAAATGAAGGCCAAAGAGAGATCAGCG  
TAAGACATATATGAAAAATCCTTCAGTAGTAGCATTTCCTATGCAAGAATTGCCAGAAGATGA  
TATGTTTCAGGAGAAGATATACAAGTTATTGAAGACATGCATCATGTCAGTGTGAAAAAAGAT  
TTCCAACATCTTTACCACACAAGAGAAAATAAGACACTGCAAGATAAACATGCTGATTATCA  
GACAAATGTGGAAATTATATGTAAAGATTGTGGACAAGCTTGGGGAAATATGATGGTTTATC  
GAGGTCTTGACCTGCCTTGTCTAAAGATTAGAAATTTTGTGCTTGTGTTTTGGAGACAAGAAA  
ACAACCAAGGACATTTTCAAGAAATGGAAAGAAGCTGCTCATCAGCTTCCCTAAGTTTGATTA  
TGCAGCTCATTGTCCTTCAAGTGATGAAGAT

>alectura\_lathami-galliformes-md5

ATGTCGGAGGAATGCCGAGACGAGCGCTTCCTCTACATGATCGCCTGCTTCAGGCCGCGG  
CTGAAGCGGTGCATTGCGGTGCAGCCGGTGCTGGACTGGCTGCCCTCCCTGAGCGCCGA  
GGAGAAGGACAGGGTGCGGGCGGGCGGCGCTGCAGCGCGGTGAGGTGGAGGGGGCTGA  
GGAGCTGCTGCGCGCCGTGGAGCGGGGGCCCCGCGGCCCGGCTGTTCCCCGAGTTC  
CTGCAGGCGCTGGAGAAAGGAGGCTGCAACCTGGCCGCTTGCTACGTGAACCCAGCCT  
CAGCCAGCTGCCCTCGCCCAGCGAGGAGGCCGACCACGACCTCTGCGTGCACCTGGTGC  
AGCTGCTGCACGGCACGCTGGTGGATAAGATGCAGACCAGGCAGGTGGCCGAGAAGTGC  
CTGGAGATGGGCATCTTCCAGGAGGAGGACGTGGTTCGGATTGATGCTGTTACTGACAAT  
CATGGGAACAGAGATGGTGCAGGGAGCTGTTGAGCAGAGTAGTGCAGAAGAAGGATTG  
GTTCTCTCCATTTTTGATTGCTCTGCGTGAAACCCAACACGAAGGCCTCGCAGATGATTTAA  
GTGGAAAAACAGGAGGAACAGAGAATAAAGAAAAATGAGATGAAGAACAGTACAAACAAAGA  
AACAGAAGCTGCAAGTCAACCAGGACATGATGAGGTGGAGGATTTGAAACAGCAACAAAAT  
TTGGATGATAATTTTGTGCGAGAGAACAGTGTATTGAAACATCAGTTGGAAAGAACTCCG  
TAGCTTCAGAGTCAGTTGTCACTGTTGGAGGTGGAAGTGTCAGTAACTTGCATGAAAACCT  
GGGACAGAGCAGCACAACCAGTGATTGAGACGAAGATGAAGCAGAGAGCAGAGCTTCACC  
TGAGCCAGATCTGATCCTGAGAGATTACCAGATGGAGGTTGCAAAGCCAGCACTGAATGG  
GGAGAATATTATAATCTGTCTCCCTACAGGCAGTGGCAAACCCAGACTGGCTGTTTACATT  
ACCAAAGATCACTTGGATAAGAAGAGAAGAGCATCAGAGCCTGGAAAAGTTATAGTACTTG  
TTAATAAGGTCCCACTAGTGGAACAGCATTTACGGAAGGAGTTTAATCCATTCTGAAACAT  
TGGTATAAGGTTATTGGTTTGAGTGGTGATACTCAGCTGAAAATCTCATTTCTGAAAGTTGT  
CAGAAGAAATGATGTCATCATCTGTACAGCACAGATCCTAGAGAATTCAGTCTAAATGCA  
GCTGAAGAAGATGAACGT---

GTCCACTTATCAGGTTTTTCACTGATCATTATTGATGAGTGTATCACACTCAAAGGAAGG  
CATCTACAACAACATTATGCGGCGTTACTTAAAAGAAAAGATGAAGAACAGAAAGCTGGCA  
AAAGAAAATAAACCTTTGATTCCACAGCCTCAGATTCTCGGACTTACAGCCTCACCTGGAG  
TAGGAGGTGCAACATCCAACCTCAAAGCTGAAGAACACATTCTGAAAATCTGCGCCAATCT  
TGATGCTCGCAGAATCATGACTGTTGAAGAGCATGCCTCCCAGCTGAAGAATCAGGTGAA  
GGAACCTTTTAAGAAGACTGTGATTGCGGATGACAAAAGAAGGGATCCATTTAGAGAAAAA  
ATTATTGAGATCATGACAGACATTCAAACCTATTGCCAGCTGTGCCCAAATCTGAGTTTGG  
ATCTCAGCCTTATGAACAGTGGGTAAATTAGAGAAGAGAAAAAAGCTGCAAAGAAGAAAAA  
CGCAAGGAACGTGTCTGTGCAGAACACTTGAAGAAATATAATGATGCTCTGCAAATTAATG  
ACACCATCCGAATGGTTGATGCATACAATCACCTAAATAACTTTTTATAAGGAGTTAAAAAGC  
AAGAAGACAGTAGGGAGTGATGATGATGAAGAACCAGTAGTATCAAACAGGATGAAACAG

ATAAATTTCTAATAGATCTATTTTCATGCAAAAAAGAAACAGCTGAAAGAGTTGGCTAGAAAG  
CCAGAATATGAAAATGAGAAGCTAATGAAGTTGCGAAACACTTTGATGGAGGAGTTCACAA  
AAACTAAGGAATCTAGAGGAATTATTTTCACAAAGACGCGACAAAGTGCCTTTGCTCTGTTT  
CAGTGGATCATGGATAACCCAAAATTTGAAGAAGTGGGGATTAAAGCTCATTATCTTATTGG  
TGCTGGACACAACAGTGAAACTAAACCTATGACTCAGAATGAGCAGAGGGAAGTCATCGAT  
AAATTCAGAGTGGGAAGTGTAATTTACTTATTGCTACTACTGTAGCTGAGGAAGGCCTAG  
ACATCAAAGAGTGTAACATTGTTATTTCGCTATGGCCTGGTCACCAATGAAATTGCTATGCTG  
CAGGCCCGTGGTCGAGCTCGAGCTGATGAGAGCACCTATGTGCTTGTAGCTTCATGTGGC  
TCAGGAGCTGTTGAACGTGAAGATGTAAATATTTTCCGTGAGAAAATGATGTATAAGGCCAT  
TCAGCGTGTCCAGAAGATGCCACCAGAAGAGTATTTTAAAAAGATTGAGAACTTCCAGTTG  
CAAAGTATAGTGGAAGCAATGAAGGCAAGGAGAGATCAGTGTAAGACATATAAGAAAA  
ACTCTTCACTAATAACATTCCAATGCAAGAATTGCCACAAGCTGGTATGTTTCAGGAGAAGAT  
ATACAAGTTATTGAAAACATGCATCATGTGAGTGTAAGAAAAGATTTCCAACATCTTTACCAT  
ACAAGAGAAAATAAGACACTGCAAGATAAACATGCTGATTACCAGACGAATGTGGAAATTAT  
ATGTAAAGATTGTGGACAAGCTTGGGGAAATATGATGGTTTATCGAGGTCTGGACCTGCCT  
TGTCTAAACATTAGAAATTTTGTGTTGTTCTTGAAGGCAAGAAAACAACAAGGAAATTTT  
CAAAAAATGGGGAGAACTGCCAATCAGATTCCCTAGTTTTGATTATGCAGCTCATTGTCCTT  
CAAGTGATGAAGAT

>rhea\_americana-rheiformes-md5

ATGTCGGACGAGTCCCGAGCCGAGCGCTTCCTCTACTTGATCTCCTGCTTCAGGGCGCGG  
CTGAAGCGCGCCATCCGCGTGCAGCCCGTGTGGACTGGCTGCCCTCGCTGGACGCCGA  
GGAGCGGGAGCGGGTGCGGGCGGCGGCGCTGCAGCAGGGCGAGGTGGAGGCGGCGGA  
GCTGCTGCTGCGCGCCGTGGAGCGGGGGCCCCGCGACTGC-----  
TTCCCCGAGTTTCTGTCAGGCGCTGGAGCGCGGCGGCTGCGGCCTGGCCGCCTGCTACGT  
GAACCCCAGCCTGAGCCAGCTGCCCTCGCCGGCGGAGGAGGCCACCACGACTTGTGCG  
TGCACTTGGTGCAGCTGCTGCACGGCACGCTGGTGGATAACATGCGGGCCGTGCAGGTG  
GCCGAGAAGTGCCTGCAGAGGGGCATCTTCCAGGTTCGAGGACCTGGAACGGATCCAGAC  
TGTTACTGAAAGTCGTGGGAATAGAGATGGTGCAAGGGAGCTGTAAAGTAGAATAGTTCAG  
AAGAAGGACTGGTTCTCCCTTTTTTGGTTGTTTTGCGTGAAACCCAACATGAAGACCTTG  
CAGATGATTTAAGTGGAATACAGGAGGAGTGGAATGGAGAAAATGGGATGAATAACAG  
GACAAATGAAGAAACAGAAGTCACAAGACAATCAGAACATGCTGGAGTGGAGGATTTCAA  
CAGCAAGAAAATATGAATGACAGTTTAGCCAGTGAGAGCAGTGTTTTGGAAAGATCTGTTG  
GAGAGAATTCTGTAGCTTCAGAGTCTGATGTCTCTATAGGAGATGGAAGTGTCAATAATGT  
GAATGAAAACCTGGGACAGAGCAGCACAACCAAGTGAATTCAGATGAAGATGAAGTGAAGAG  
CAGAGCTTCACCTGAGCCAGAACTGATCCTGAGAGATTACCAGATGGAAGTTGCAAAACCA  
GCATTGAATGGGGAGAATATTATAATATGTCTCCCTACAGGCAGTGGTAAAACCAAGAGTGG  
CTGTTTATATTACCAAAGATCATTTGGATAAGAAGAGAAGAGCATCAGAGCCTGGAAAAGTT  
ATAGTACTTGTTAACAAGGTACCATTGGTGGAACAGCATTTACGAAAGGAGTTTCATCCATT  
CCTGAGGCGCTGGTATCAGGTTATTGGTTTAAGCGGTGATTGTCAGCTGAAAATCTCATTT  
CCTGAAGTTGTCAGAAGAAACGATGTCATAATCAGTACAGCACAGATCCTGGAGAATTCAC  
TGCTAAATGCAACTAAAGAAGAAGAGGAAGGTGTCCGTTTATCAGATTTTTTCACTTATCATT  
ATTGATGAATGTCATCACACTCAAAGGAAGGTGTCTACAACAATATAATGCGACATTACTT  
AAAAGAAAAGATGAAGAATGAGAAGCTGGCGAAAGAA---  
AAACTACTCATTCCACAACCTCAGATTCTGGGACTTACAGCCTCACCTGGTGTAGGAGGTG

CAACATCCTATTTGAAAGCTGAAGAACATATTCTGAAAATCTGTGCAAACCTTGATGCATGT  
AGAATCATGACTGTTGAAGAGCATGCCTCCCAACTGAGGAATCAGGTGAAGGAACCATATA  
AGAAGACTGTGATTGCAGATGACAAAAGAAGGGATCCATTTAGAGAGAAAATTATCGAGAT  
CATGACAGAAATTCAAAAGTATTGCCAGCTCCATCCAAAATCTGAGTTTGGAACCTCAGCCAT  
ATGAACAGTGGGTGATTAGAGAGGAGAAGAAAGCGGCAAAAAGAAGAAAAACGCAAGGAAC  
GTGTCTGCGCAGAACACTTGAAGAAATACAACGATGCTTTGCAAATAAATGACACTATTCGA  
ATGTTGATGCATACAATCACCTATGTAACTTTTATAAGGAGGAAAAAAGTAAAAAACAAT  
AGTGAGTGATGATGAGGATGAACCAGCAGTATCAAAACAGGATGAAACAGATGAATTTCTA  
ATAGGTTTGTTTTATGCAAAAAAGAAACAGCTGAAAGAGTTGTCTGGAAAACCTGAATATGA  
AAATGAGACACTAACAAAGTTGCGCGACACCTTAATGGAGGAGTTCACGAAGACTGATGAA  
CCAAGAGGAATTATTTTCACAAAGACGCGGCAAAGTGCTTTTGCTCTGTTTCAGTGGATTAA  
AGATAACAAAAAATTTGAAGAAGTGGGAATTAAGGCCATTATCTTATTGGTGCTGGAACA  
ACAGTGAAACTAAAGCTATGACTCAGAATGAGCAGAGGGAAGTCATTGGTAAATTCCGAGA  
TGGAAGTGTAACCTTACTCATTGCTACTACTGTAGCTGAGGAAGGCTTGACATCAAGGAG  
TGTAACATTGTTATTCGCTATGGCCTTGTCACCAATGAAATTGCTATGTTGCAGGCCCGTG  
GTCGAGCTCGAGCTGATGAGAGCACCTATGCACTTGTTGGCTTCAAGCAACTCAGGAGCAG  
TTGAACGTGAGGATGTTAATAGCTTCCGTGAGAAAATGATGTATAAGGCGATTTCAGCGTGT  
CCAGAAGATGCCACGGAAAGAGTACTTAACAAGATTCAGACCTTCCAGTTGCAAAGTATA  
ATGGAAAAAATGAAGACAAGGAGAGATCAATGTAAGACATATACGAAAAGACCTTCAC  
TAATAAAATTCTTATGCAAAAATTGCTGCAAGTTGGTATGTTTCAGGAGAAGATATACAAGTT  
ATTGAAAACATGCATCATGTCAGTGTGAAAAAAGATTTCCAAAGCCTTTACCATACCAGAGA  
AAATAAGACATTGCAAGATAAACATGCTGATTACCAGACAAATAGAGAAATTACATGTAAAG  
ACTGTGGACAAGCTTGGGGAAATATGATGGTTCACCGAGGTCTTGACCTGCCTTGTCTAAA  
GATTAAAAATTTTGTGGTTGTGTTTGAAGACAAGAAAACAACAAAGCAAATTTTAAAGAAATG  
GGGAGAACTGCTAGTCAGGTTCCCTGGTTTTGATTATGCAGGGCATTGTCCTTCAAGTGAT  
GAAGAT

>struthio\_camelus-struthioformes-mda5

ATGTCGGAGGAGTCCCGAGCCGAGCGCTTCCTCTACATGATTTCCCTGCTTCAGGCCGCGG  
CTGAAGCGCACCATCCGGGTGCAGCCGGTGCTGGACTGGCTGCCCTCGCTGAGCGCCGA  
GGAGCGGGAGCAGGTGCGG---  
GCGGCGCTGCAGCGGGGCGAGGTGGAGGCGGCGGAGCTGCTGCTGCGCGCCGTGGAG  
CGGGGGCCCCRCGACCGC-----  
TTCCCCGAGTTCCTGCAGGCGCTGGAGCGCGGCGGCTGCAGCCTGGCCGCCTGCTACGT  
GAACCCCAGCCTCAGCCAGCTGCCCTCGCCGGCGGAGGAGGCCGACCACGACCTCTGCG  
TGCACTTGGTGCAGCTGCTCCACGGCACGCTGGTGGATAACATGCGGACCATGCAGGTG  
GCCGAGAAGTGCCTGCAGATGGACATCTTCCAGGTGAGGACCTGGAGCGGATCCAGAC  
TGTTACTGAAAATCGTGGGAACAGAGATGGTGCAAGGGAAGTGTAAAGTAGAATAGTTCAG  
AAGAAGGACTGGTTCTCCCCTTTTTTGATCGCTTTGCGTGGAACCCAACATGAAGACCTTG  
CAGATGATTTAAGTGGAATACGGGAGGAATAGAAAATAGAGAAAACGAAATGAATAACAG  
GACAAATGAAGAAACAGAAGTCACAAGGCAACCGGGACATGCTATAGTGAGGATTTCAA  
CAGCAAGAAAATATGAATGACAGGTTAGCCAGTGAGAGTAACGTTTTTGAAAGATCTATTG  
GAGAGAATTCTGTAGCTTCAGAGTCTGATGTCTGTATAGGAGATGGAAGTGTGAGTAACAT  
GAATGCAAACCTGGCACAGGGCAGCACCAACAGTGATTTCAGATGAAGATGATATGGAAAG  
CAGAGCTTCACCTGAGCCAGATCTGACCCTGAGAGATTACCAGATGGAAGTTGCAAAACCA

GCACTGAACGGGGAGAATATTGTCATATGTCTCCCTACAGGCAGTGGTAAAACCAGAGTG  
GCTGTTTACATTACCAAAGATCACTTGGATAAGAAGAGAAGAGCATCAAAGCCTGGAAAAG  
TTATAGTACTTGTTAATAAGGTACCATTGGTGGAACAGCATTTACGAAAGGAGTTTCAGCCA  
TTCCTGAAGCGTTGGTATCAGGTTATTGGTTTAAGTGGTGATTCTCAGCTGAAAATCTCATT  
TCCTGAAGTTGTCAGAAGAAATGATGTCATAATCAGTACAGCACAGATCCTTGAGAATTCAC  
TGCTAAACGCAACTAAAGAAGATGAGGAAGGTGTCCGCTTATCAGATTTTTCTACTTATCATT  
ATTGATGAATGTCACCACACTCAAAGGAAGGTGTCTACAACAATATAATGCGACGTTACTT  
AAAAGAAAAGATGAAGAATGAGAAGCTGGCAAAGAAAACAGACCACTAATTCCACAGCCT  
CAGATTCTGGGACTTACAGCCTCACCTGGTGTAGGAGGTGCAACATCCTATTTGAAAGCTG  
AAGAACATATTCTGAAATTCTGTGCCAATCTTGATGCATGTAGAATCATGACTGTTGAAGAG  
CATGCCTCCCAACTGAGGAATCAGGTGAAGGAACCATATAAGAAGACTGTGATTGCAGATG  
ACAAAAGAAGGGATCCGTTTAGAGAGAAAATTATCGAGATCATGACCGACATTCAAACCTAT  
TGCCAGCTCCATCCAAAATCTGAGTTTGGAACTCAGCCATATGAGCAGTGGGTGATTAGGG  
AGGAGAAAAAAGCGGCAAAAGAAGAAAAACGCAAGGAACGTGTGTGTGCAGAACACCTGA  
AGAAATACAATGATGCTTTGCAAATAAATGATACCATTGCAATGGTTGATGCATACAATCAC  
CTAAGTAACTTTTATAAGGAGGAAAAAAGCAAGAAAACAATAGTGAGTGATGATGAGGATG  
AACCAGCAGTATCAAAACAGGATGAAACAGATGAATTTCTAATAGGTTTATTTTATGCAAAA  
AAGAAACAGCTGAAAAAGTTGGCTAGAAATCCAGAATATGAAAATGAGACGCTAACACAGC  
TGCGAAATACTTTAATGGAGGAGTTCACCAAGACTGATGAACCAAGAGGAATTATTTTCACA  
AAGACCCGGCAAAGTGCCTTTGCTCTGTTTCAGTGGATTAAGGATAACACAAAAATTTGAAG  
AAGTGGGAATTAAGCCCATTATCTTATTGGCGCTGGACACAACAGTGAAATTAACCCAT  
GACTCAGAAATGAGCAAAGGGAAGTCATTGGTAAATTCCGAAATGGAAGTGTAACCTTACTC  
ATCGCTACTACTGTAGCTGAGGAAGGCCTGGACATCAAGGAGTGTAACATTGTTATTCGCT  
ATGGCCTTGTCACCAATGAAATTGCTATGTTGCAGGCCCGTGGTTCGAGCTCGAGCTGATG  
AGAGCACCTATGCACTTGTGGCTTCAAGCAACTCAGGAGCTGTTGAACGTGAGGATGTTAA  
TAGTTTCCGTGAGAAAATGATGTATAACGCCATTACAGCGTGTCCAGAAGATGCCACAGAAA  
GAGTATTTAAAAAGATTACAGACCTTCCAGTTGCAAAGTATAATGGAAAAAAAATGAAGGC  
AAAGAGAGATCAGTGTAAGACATATAAGAAAAATCCTTCACTAATAACATTCCATGCAAAA  
ATTGCCACAAGCTGGTATGTTTCAGGAGAAGATATACAAGTTATTGAAAACATGCATCATGTC  
AGTGTGAAAAAAGATTTCCAAAGCCTTTATGATAAAAGAGAAAATAAGACACTGCAAGATAA  
ACATGCTGATTACCAGACAAATGGGGAAATTATATGTAAAGACTGTGGACAAGCTTGGGGA  
AATATGATGGTTACCGAGGTCTTGACCTGCCTTGTCTAAAGATTAAAAATTTTGTGGTTGT  
GTTTGAAGACAAGAAAACAACAAAGCAAATTTTTAAGAAATGGGGAGAACTGCCAGTCAGG  
TTCCCTGTTTTTGATTATGCAGGTCAATTGTCTTCAAGTGATGAAGAT

>apteryx\_owenii-apterygiformes-mda5

ATGTCGGAGGAGTCCCGAGTCGAGCGCTTCCTCTACATGATCTCCTGCTTCAGGACGCGG  
CTGAAGCGCGCCATCCGCGTGGACCCCGTGCTGGACTGGCTGCCGTCGCTGAGCGCCGA  
GGAGCGGGAGCGGGTGCGGGCGGCGGCGCTGCAGCGGGGCCAGGTGGAGGCGGCGGA  
GCTACTGCTGCGCGCCGTGGAGCGGCGGCCCGCGACTGC-----  
TTCCCCGAGTTCTGCTGGCGCTGGAGCGCGGCGGCTGCGGCCTGGCCGCCAGCTACGT  
GAACCCCAGCCTCAGCCAGCTGCCCTCGCCGGCGGAGGAGGCTGACAACGACCTGTGCG  
TGCACTTGGTGCAGCTGCTCCACGGCACGCTGGTGGATAACATGCGGACCATGCAGGTG  
GCCGAGAAGTGCCTGCAGACGGACATCTTCCAGGTGGAGGACCTGGAGCGGATCCAGAC  
TGTTACTGAAAGTCGTGGGAATAGAGATGGTGCAAGGGAGCTGCTAAGTAGAATAGTTCAG

AAGAAGAACTGGTTCTCCCCTTTTTTGATTGCTTTGCGTGAAACCCAACATGAAGACCTTGC  
AGATGATTTAAGTGGAATACAGGAGGCGTAGAAAATAGAGAAAATGGGATGAATAACAGG  
ACAAATGAAGAAACAGAAGTCACAAGGCAACCGGGACATGCTATAGTTGAGGATTTCAAAC  
AGCAAGAAAATACAAATGATAGTTTAGCCAGTGAGAGCGGTGTTTTGGAAAGATCTATTGG  
AGAGAATTCTGTAGCTTCAGAGTCTGATGTCTCAGTAGGAGATGGAAGTGTGAGTAATGTG  
AATGAAAACCTTGGAACAGAGCAGCACCAACAGTGATTCAGATGAAGATGAAGTGGAGAGC  
AGAGCTTCACCTGAGCCAGAATTGATCCTGAGGGATTACCAGATGGAAGTTGCAAAACAG  
CACTGAATGGGGAGAATGTTATAATATGTCTCCCTACAGGTAGTGGTAAAACAGAGTGGC  
TGTTTACATTACCAAAGATCACTTGGATAAGAAGAGAAGAGCATCAGAGCCTGAAAAGTT  
ATAGTACTTGTTAATAAGGTACCATTGGTGGAACAGCATTTACGAAAGGAGTTTCATCCATT  
CCTGAAGCGTTGGTATCAGGTTATTGGTTTAAGTGGTGATTCTCAGCTGAAAATCTCATTTCT  
CTGAAGTTGTCAGAAGAAACGATGTCATAATCAGCACAGCACAGATCCTGGGGAATTGCT  
GCTAAACGCAACTGAAGAAGATGAGGAAGGTGTCCATTTATCAGATTTTACACTTATCATT  
TTGATGAATGTCATCACACTCAAAGGAAGGTGTCTACAACAATATAATGCGACATTACTTA  
AAAGAAAAGATGAAGAATGGGAAGCTGGCAAAAGAAAACAGACCACTCATTCCACAGCCTC  
AGATTCTGGGACTTACAGCCTCACCTGGTGTAGGAGGTGCAACATCCTCTTTGAAAGCTGA  
AGAACATATTCTGAAAATCTGTGCCAATCTTGATGCGCGTAGAATCATGACTGTTGAAGAG  
CATGCCTCCCAACTGAGGAATCAGGTGAAGGAACCATATAAGAAGACTGTGGTTGCAGAT  
GACAAAAGAAGGGATCCATTTAGAGAGAAAATTATTGAGATCATGACAGACATTCAAACTA  
TTGCCAGCTCCATCCAAAATCTGAGTTTGGAAGTCAAGCCCTATGAACAGTGGGTGATTAGA  
GAGGAGAGAAAAGCGGCAAAAGAAAACGCAAGGAACGTGTCTGTGCAGAACACTTG  
AAGAAATACAATGATGCTTTGCAAATAAATGACATTATTCGAATGGTTGATGCATACGATCA  
CCTACGTAACCTTTTATAAGGAGGAAAAAAGCAAAAAACAATAGTGAGTGATGATGAGGAT  
GAACCAGCAGTATCAAAACAGGATGAAACCGATGAATTTCTAATAGGTTTGTATGCAAA  
AAAGAAACAGCTGAAAGAGTTGGCTAGAAAGCCCGAATATGAAAATGAGACGCTAACAAAG  
TTGCGAAACACTTTAATGGAGGAGTTCACAAAGACTAATGAACCAAGAGGAATTATTTTCAC  
AAAGACGCGGCAAAGTGCCTTTGCTCTGCTCCAGTGGATTAAGGATAACCCAAAATTTGAA  
GAAGTGGGAATTAAGGCGCATTATCTTATTGGCGCTGGACACAACAGTGAAACTAAACCTA  
TGAATCAGAATGAGCAAAGGGAAGTCATCAGTAAATCCGAGATGGAAGTGTAACTTACT  
CATTGCTACTACTGTAGCTGAGGAAGGCCTGGATATCAAGGAGTGTAACATTGTTATTCGC  
TATGGCCTTGTCACCAATGAAATTGCTATGGTGCAGGCCCGTGGTCGAGCTCGAGCTGAT  
GAGAGCACCTATGCACTTGTGGCTTCAAGCGACTCAGGAGCTGTTGAACGTGAGGATGTT  
AATAGTTTCCGTGAGAAAATGATGTATAAGGCCATTGAGCGTGTCCAGAAGATGCCACAGA  
AAGAGTACTTAAACAAGATTCAGACCTTCCAGTTGCAAAGTATAATGGAAAAAGAATGAAG  
GCAAAGAGAGATCAATGTAAGACATATAAGAAAAATCCTTCACTAATAAAATTCCTATGCAA  
AAATTGCCACAAGCTGATATGTTGAGGAGAAGATATACAAGTTATTGAAAACATGCATCATG  
TCAGTGTGAAAAAAGATTTCCAAAGCCTTTACCATACAAGAGAAAATAAGACACTGCAAGAT  
AAACATGCTGATTACCAGACGAATGGGGAAATTATATGTAAAGACTGTGGACAAGCTTGGG  
GAAATATGATGGTTCACCGAGGTCTTGACCTGCCTTGTCTAAAGATTAAAAATTTTGTGGTT  
GTGTTTGAAGACAAGAAAACAACAAAGCAAATTTTAAAGAAATGGGGAGAACTGCCAGTCA  
GGTTCCCTGTTTTTGATTATGCAGGTCATTGTCCTTCAAGTGATGAAGAT

>apteryx\_rowi-apterygiformes-mda5

ATGTCCGAGGAGTCCCGAGTCGAGCGCTTCTCTACATGATCTCCTGCTTCAGGACGCGG  
CTGAAGCGCGCCATCCGCGTGGACCCCGTGCTGGACTGGCTGCCGTCGCTGAGCGCCGA

GGAGCGGGAGCGGGTGCGGGCGGCGGCGCTGCAGTGGGGCCAGGTGGAGGCGGCGGA  
GCTACTGCTGCGCGCCGTGGAGCGGCGGCCCGCGACTGC-----  
TTCCCCGAGTTCCTGCTGGCGCTGGAGCGCGGCGGCTGCGGCCTGGCCGCCAGCTACGT  
GAACCCAGCCTCAGCCAGCTGCCCTCGCCGGCGGAGGAGGCCGACAACGACCTGTGCG  
TGCACTTGGTGCAGCTGCTCCACGGCACGCTGGTGGATAACATGCGGACCATGCAGGTG  
GCCGAGAAGTGCCTGCAGATGGACATCTTCCAGGTGGAGGACCTGGAGCGGATCCAGAC  
TGTTACTGAAAGTCGTGGGAATAGAGATGGTGCAAGGGAGCTGCTAAGTAGAATAGTTCAG  
AAGAAGAACTGGTTCTCCCTTTTTTATTGCTTTGCGTAAAACCCAACATGAAGACCTTGC  
AGATGATTTAAGTGGAAATACAGGAGGCGTAGAAAAATAGAGAAAAATGGGATGAATAACAGG  
ACAAATGAAGAAACAGAAGTCACAAGGCAACCGGGACATGCTATAGTTGAGGATTTCAAAC  
AGCAAGAAAATACAAATGATAGTTTAGCCAGTGAGAGCGGTGTTTTGGAAAGATCTATTGG  
AGAGAATTCTGTAGCTTCAGAGTCTGATGTCTCAGTAGGAGATGGAAGTGTGAGTAATGTG  
AATGAAAACCTTGGAACAGAGCAGCACAACCAAGTATTGAGATGAAGTGGAGAGC  
AGAGCTTCACCTGAGCCAGAAGTATCCTGAGGGATTACCAGATGGAAGTTGCAAAACCA  
GCACTGAATGGGGAGAATGTTATAATATGTCTCCCTACAGGTAGTGGTAAAACCAAGAGTGG  
CTGTTTACATTACCAAAGATCACTTGGATAAGAAGAGAAGAGCATCAGAGCCTGGAAAAGT  
TATAGTACTTGTTAATAAGGTACCATTGGTGGAAACAGCATTTACGAAAGGAGTTTCATCCAT  
TCCTGAAGCGTTGGTATCAGGTTATTGGTTTAAGTGGTGAATTCTCAGCTGAAAATCTCATT  
CCTGAAGTTGTCAGAAGAAACGATGTCATAATCAGCACAGCACAGATCCTGGGGAATTCGC  
TGCTAAACGCAACTGAAGAAGATGAGGAAGGTGTCCATTTATCAGATTTTACACTTATCATT  
ATTGATGAATGTCATCACACTCAAAGGAAGGTGTCTACAACAATATAATGCGACATTACTT  
AAAAGAAAAGATGAAGAATGGGAAGCTGGCAAAAGAAAACAGACCACTCATTCCACAGCCT  
CAGATTCTGGGACTTACAGCCTCACCTGGTGTAGGAGGTGCAACATCCTCTTTGAAAGCTG  
AAGAACATATTCTGAAAATCTGTGCCAATCTTGATGCACGTAGAATCATGACTGTTGAAGAG  
CATGCCTCCCAACTGAGGAATCAGGTGAAGGAACCATATAAGAAGACTGTGGTTGCAGAT  
GACAAAAGAAGGGATCCATTTAGAGAGAAAAATTATCGAGATCATGACAGACATTCAAAACTA  
TTGCCAGCTCCATCCAAAATCTGAGTTTGGAACCTCAGCCCTATGAACAGTGGGTGATTAGA  
GAGGAGAGAAAAGCGGCAAAAGAAAAACGCAAGGAACGTGTCTGTGCAGAACACTTG  
AAGAAATACAATGATGCTTTGCAAATAAATGACATTATTCGAATGGTTGATGCATACGATCA  
CCTACGTAACCTTTTATAAGGAGGAAAAAAGCAAAAAACAATAGTGAGTGATGATGAGGAT  
GAACCAGCAGTATCAAAACAGGATGAAACAGATGAATTTCTAATAGGTTTGTGTTTATGCAAA  
AAAGAAACAGCTGAAAGAGTTGGCTAGAAAGCCCGAATATGAAAATGAGACGCTAACAAAG  
TTGCGAAACACTTTAATGGAGGAGTTCACAAAGACTAATGAACCAAGAGGAATTATTTTAC  
AAAGACCCGGCAAGTGCCCTTTGCTCTGCTCCAGTGGATTAAGGATAACCCAAAATTTGAA  
GAAGTGGGAATTAAGGCCATTATCTTATTGGCGCTGGACACAACAGTGAAACTAAACCTA  
TGAATCAGAATGAGCAAAGGGAAGTCATCAGTAAATTCGAGATGGAAGTGTAACTTACT  
CATTGCTACTACTGTAGCTGAGGAAGGCCTGGATATCAAGGAGTGTAACATTGTTATTCGC  
TATGGCCTTGTCACCAATGAAATTGCTATGGTGCAGGCCCGTGGTCGAGCTCGAGCTGAT  
GAGAGCACCTATGCACTTGTGGCTTCAAGCGACTCAGGAGCTGTTGAACGTGAGGATGTT  
AATAGTTTCCGTGAGCAAATGATGTATAAGGCCATTCAGCGTGTCCAGAAGATGCCACAGA  
AAGAGTACTTAAACAAGATTCAGACCTTCCAGTTGCAAAGTATAATGAAAAAAGAATGAAG  
GCAAAGAGAGATCAATGTAAGACATATAAGAAAAATCCTTCACTAATAAAATTCCTATGCAA  
AAATTGCCACAAGCTGATATGTTTCAGGAGAAGATATACAAGTTATTGAAAACATGCATCATG  
TCAGTGTGAAAAAAGATTTCCAAAGCCTTTACCATACAAGAGAAAAATAAGACACTGCAAGAT

AAACATGCTGATTACCAGACGAATGGGGAAATTATATGTAAAGACTGTGGACAAGCTTGGG  
GAAATATGATGGTTCACCGAGGTCTTGACCTGCCTTGTCTAAAGATTAAAAATTTTGTGGTT  
GTGTTTGAAGACAAGAAAACAACAAAGCAAATTTTAAAGAAATGGGGAGAACTGCCAGTCA  
GGTTCCTGTTTTTGATTATGCAGGTCATTGTCCTTCAAGTGATGAAGAT

>casuarius\_casuarius-casuariiiformes-mda5

ATGTCGGCGGAGTCCGGAGCCGAGCGCTTCCTCTACATGATCCTGTGCTTCAGGGCGCG  
GCTGAAGCGCGTCATCCGCGTGCAGCCGGTGCTGGACTGGCTGCCCTCGCTGAGCGCCG  
AGGAGCGGGAGCGGGTGCGGGCCGCGGCGCTGCAGCAGGGCGAGGTGGAGGCGGCGG  
AGCTGCTGCTGCGCGCCGTGGAGCGGGGGCCCCGCGACCAC-----

TTCCCCGAGTTCCTGCAGGCGCTGGAGCGCGGCGGCTGCGGCCTGGCCGCCTGCTACGT  
GAACCCC-----

AGCCAGCTGCCCTCGCCGGCGGAGGAGGCTGAAAACGACCTCTGCGTGCACCTTGGTGCA  
GCTGCTCCACGGCACGCTGGTGGATAACATGCGTGCCACGCAGGTGGCCGAGAAGTGCC  
TGCAGATGGGCATCTTTCCAGGTTCGAGGAGTGGAGCGGATCCAGACCGTTACTGAAAGTC  
GTGGGAATAGAGATGGTGCAAGGGAGCTGCTAAGTAGAATAGTTCAGAAGAAGGACTGGT  
TCTCCCCTTTTTTGATTGCTTTGCGTGAAACCCAGCATGAAGACCTTGCAAATGATTTAAGT  
GGAAATACAAGAGGAGTAGAAAAATAGAGAAAAATGGGATGAATAACAGGACAAATGAAGAAG  
CAGAAGTCGCAATGCAACCGGGACATGCCGTAGTGGAGAATTTCAAACAGCAAGAAAAATAT  
GAATGATAGTTTAGGCAGTGAGAGCATTGTTTCGAAATATCTGTTGGAGAGAATTCTGTA  
GCTTCAGAGTCTGATGTCTCTGTAGGAGATGGAAGTGTGAGTAATGTGAATGAAAACCTGG  
GACAGAGCAGCACAACCAGTGATTCAGATGAAGATGAAGTGGAGAGCAGAGCTTCACCTG  
AGCCAGAGCTGATCCTGAGAGATTACCAGATGGAAGTTGCAAAACCAGCATTGAATGGGG  
AGAATATTATAATATGTCTCCCTACAGGCAGTGGTAAAACCAGAGTGGCTGTTTACATTACC  
AAAGATCACTTGGATAAGAAGAGAAGAGCATCAGAGCCTGGAAAAGTTATAGTACTTGTTA  
ATAAGGTACCATTGGTGGAACAGCATTTACGAAAGGAGTTTCATCCATTCTGAAGCGTTG  
GTATCAGGTTATTGGTTTAAGTGGTGATTGTCAGCTGAAAATCTCATTTCTGAAGTTGTCA  
AAAGAAATGATGTCATAATCAGTACAGCCCAGATCCTTGAGAATTCAGTGTAAATGCAACT  
AAAGAAGATGAGGAAGGTGTCCATTTATCAGATTTTTCACTTATCATTATTGATGAATGTCAT  
CACACTCAAAGGAAGGTGTCTACAACAATATAATGCGACGTTACTTAAAAGAAAAGATGAA  
GAATGGGAAGCTGGCAAAAGAAAACAGACCATTTCGTTCCACAGCCTCAGATTCTGGGACTT  
ACAGCCTCACCTGGTGTAGGAGGTGCAACATCCTATTTGAAAGCTGAAGAACATATTCTGA  
AAATCTGTGCCAATCTTGATGCATGTAGAATCATGACTGTTGAAGAGCATGCCTCCCAACT  
GAGGAATCAGGTGAAGGAACCATATAAGAAGACTGTGATTGCGGATGACAAAAGAAGGGA  
TCCATTTAGAGAGAAAAATTATTGAGATCATGACAGACATTCAAACTATTGCCAGCTCCATC  
CAAAATCTGAGTTTGGAACCTCAGCCATATGAACAGTGGGTGATTAGAGAGGAGAAAAAAGC  
GGCAAAAGAAGAAAAACGCAAGGAACGTGTCTGTGCAGAACATCTGAAGAAATACAATGAT  
GCTTTGCAAATAAATGACACTATTGCAATGGTTGATGCATACAATCACCTACGTAACCTTTTAT  
AAGGAGGAAAAAAGCAAAAAACAGTAGTGAGTGATGATGAGGATGAACCAGCAGTATCCA  
AACAGGATGAAACAGATGAATTTCTAATGGGTTTATTCAATGCAAAGAAGAAACAGCTGAAA  
GAGTTGGCTAGAAAGCCCGAATATGAAAATGAGACTCTAACAAAGTTGCGAAACACTTTAA  
TGGAGGAGTTCACAAAGACTGTTGAACCGAGAGGAATTATTTTACAAAGACCCGGCAAAG  
TGCTTTTGTCTGTTCCAGTGGATTAAGGATAACACAAAATTTGAAGAAGTGGGAATTAAG  
GCCATTATCTTATTGGCGCTGGACACAACAGTGAACTAAACCCATGACTCAGAATGAGC  
AAAGGGAAGTCATTGGTAAATTCCGAGATGGAAGTGTAACCTTACTCATTGCTACTACTGTA

GCTGAGGAAGGCCTGGACATCAAGGAGTGTAAACATTGTTATTCGCTATGGCCTTGTACCA  
ATGAAATTGCTATGTTGCAGGCTCGTGGTCGAGCTCGAGCTGATGAGAGCACCTATGCACT  
TGTGGCTTCAAGCGACTCAGGAGCTGTTGAACGTGAGGATGTTAATAGTTTCCGTGAGAAA  
ATGATGTATAAGGCCATTTCAGCGTGTCCAGAAGATGCCACAGAAAGAGTACTTAAACAAGA  
TTCAGACCTTCCAGTTGCAAAGTATAATGGAAAAAAGAATGAAGGCAAAGAGAGATCAGTG  
TAAGACATATAAGAAAAATCCTTCACTAATAAAATTCTATGCAAAAATTGCCACAAGCTGAT  
ATGTTTCAGGAGAAGATATACAAGTTATTGAAAACATGCATCACGTGAGTGTGAAAGAAGATT  
TTCAAAGCCTTTACCATACAAGAGAAAAATAAGACACTGCAAGATAAACATGCTGATTACCAG  
ACAAATGGGGAAATTATATGTAAAGACTGTGGACAAGCTTGGGGAAATATGATGGTTCACC  
GAGGTCTTGACCTGCCTTGCCTAAAGATTAAAAATTTTGTGGTTGTGTTTGAAGACAAGAAA  
ACAATAAAGCAAATTTTTAAGAAATGGGGGAGAACTGCCAGTCAGGTTCCCTGTTTTTGATTA  
TGCAGGTCATTGTCTTCAAGTGATGAAGAT

>dromaius\_novaehollandiae-casuariiformes-mda5

ATGTCGGCGGAGTCCGGAGCCGAGCGCTTCCTCTACATGATCCTGTGCTTCAGGGCGCG  
GCTGAAGCGCGTCATCCGCGTGCAGCCGGTGCTGGACTGGCTGCCCTCACTGAGCGCCG  
AGGAGCGGGAGCGGGTGCGGGCCGCGGCGCTGCAGCAGGGCGAGGTGGAGGCGGCGG  
AGCTGCTGCTGCGCGCCGTGGAGCGGGGGCCCCGCGACCGC-----  
TTCCCCGAGTTCTCTGCAGGCGCTGGAGCGCGGCGGCTGCGGCCTGGCCGCCTGCTACGT  
GAACCCC-----

AGCCAGCTGCCCTCGCCGGCGGAGGAGGCCGAAAACGACCTCTGCGTGCACTTGGTGCA  
GCTGCTCCACGGCACGCTGGTGGATAACATGCGTGCCACGCAGGTGGCCGAGAAGTGCC  
TGCAGATGGGCATCTTCCAGGTCGAGGATGTGGAGCGGATCCAGACTGTTACTGAAAGTC  
GTGGGAATAGAGATGGTGCAAGGGAGCTGCTAAGTAGAATAGTTCAGAAGAAGGACTGGT  
TCTCCCCTTTTTTGATTGCTTTGCGTGAAACCCAGCATGAAGACCTTGCAAATGATTTAAGT  
GGAAATACAAGAGGAGTAGAAAATAGAGAAAATGGGATGAATAACAGGACAAATGAAGAAG  
CAGAAGTCGCAATGCAGCTGGAACATGCTGTAGTGGAGGATTTCAAACAGCAAGAAAATAT  
GAATGATAGTTTAGGCAGTGAGAGCATTGTTTCGGAAAGATCTGTTGGAGAGAATTCTGTA  
GCTTCAGAGTCTGATGTCTCTGTAGGAGATGGAAGTGTGAGTAATGCGAATGAAAACCTGG  
GACAGAGCAGCACCAACAGTGATTCAGATGAAGATGAAGTGGAGAGCAGAGCTTCACCTG  
AGCCAGAGCTGATCCTGAGAGATTACCAGATGGAAGTTGCAAAACCAGCATTGAATGGGG  
AGAATATTATAATATGTCTCCCTACAGGCAGTGGTAAAACCAGAGTGGCTGTTTACATTACC  
AAAGATCACTTGGATAAGAAGAGAAGAGCATCAGAGCCTGGAAAAGTTATAGTACTTGTTA  
ATAAGGTGCCATTGGTGGAACAGCATTTACGAAAGGAGTTTCATCCATTCCTGAAGCGTTG  
GTATCAGGTTATTGGTTTAAGTGGTGATTGTCAGCTGAAAATCTCATTTCTGAAGTTGTCA  
GAAGAAATGATGTCATAATCAGTACAGCCCAGATCCTTGAGAATTCAGTGTTAAATGCAACT  
AAAGAAGATGAGGAAGGTGTCCATTTATCAGATTTTTCACTTATAATTATTGATGAATGTCAT  
CACACTCAAAGGAAGGTGTCTACAACAATATAATGCGACGTTACTTAAAAGAAAAGATGAA  
GAATGGGAAGCTGGCAAAAGAAAACAGACCATTTCGTTCCACAGCCTCAGATTCTGGGACTT  
ACAGCCTCACCTGGTGTAGGAGGTGCAACATCCTATTTGAAAGCTGAAGAACATATTCTGA  
AAATCTGTGCCAGTCTTGATGCATGTAGAATCATGACTGTTGAAGAGCATGCCTCCCAACT  
GAGGAATCAGGTGAAGGAACCATATAAGAAGACTGTGATTGCGGATGACAAAAGAAGGGA  
TCCATTTAGAGAGAAAATTATTGAGATCATGACAGACATTCAAACCTATTGCCAGCTCCATC  
CAAATCTGAGTTTGGAACTCAGCCATATGAACAGTGGATGATCAGAGAGGAGAAAAAAGC  
GGCAAAAGAAGAAAAACGCAAGGAACGTGTCTGTGCAGAACATCTGAAGAAATACAATGAT



GCTTTGCAAATAAATGACACTATTCTGAATGGTTGATGCATACAATCACCTACGTAACCTTTTAT  
AAGGAGGAAAAAAGCAAAAAACAGTAGTGAGTGATGATGAGGATGAACCAGCAGTATCAA  
AACAGGATGAAACAGACAAATTTCTAATGGGTTTATTCAATGCAAAGAAGAAACAGCTGAAA  
GAGTTGGCTAGAAAGCCCGAATATGAAAATGAGACTCTAACAAAGTTGCGAAACACTTTAA  
TGGAGGAGTTCACAAAGACCGTTGAACCGAGAGGAATTATTTTCACAAAGACTCGGCAAAG  
TGCCCTTGCTCTGTTCCAGTGGATTAAGGATAACACAAAATTTGAAGAAGTGGGAATTAAG  
GCCCATTATCTTATTGGTGCTGGACACAACAGTGAAACTAAACCCATGACTCAGAATGAGC  
AAAGGGAAGTCATTGGTAAATTCCGAGATGGAAGTGTAACCTTACTCATTGCTACTACTGTA  
GCTGAGGAAGGCCTGGACATCAAGGAGTGTAACATTGTTATTTCGCTATGGCCTTGTCACCA  
ATGAAATTGCTATGTTGCAGGCCCGTGGTCGAGCTCGAGCTGATGAGAGCACCTATGCAC  
TTGTGGCTTCAAGCGACTCAGGAGCTGTTGAACGTGAGAATGTTAATAGTTTCCGTGAGAA  
AATGATGTATAAGGCCATTTCAGCGTGTCCAGAAGATGCCACAGAAGGAGTATTTAAACAAG  
ATTCAGACCTTCCAGTTGCAAAGTATAATGGAAAAAGAATGAAGGCAAAGAGAGATCAGT  
GTAAGACATATAAGAGAAATCCTTCACTAATAAAATTCCTATGCAAAAATTGCCACAAGCTG  
ATATGCTCAGGAGAAGATATACAAGTTATTGAAAACATGCATCACGTCAGTGTGAAAGAAG  
ATTTTCAAAGCCTTTACCATAACAAGAGAAAATAAGACACTGCAAGATAAACATGCTGATTAC  
CAGACAAATGGGGAAATTATATGTAAAGACTGTGGACAAGCTTGGGGAAATATGATGGTTC  
ACCGAGGTCTTGACCTGCCTTGTCTAAAGATTAATAATTTTGTGGTTGTGTTTGAAGACAAG  
AAAACAATAAAGCAAATTTTTAAGAAATGGGGGAGAACTGCCAGTCGGGTTCCTGTTTTGA  
TTATGCAGGTCATTGTCCTTCAAGTGATGAAGAT

>anser\_cygnoides-anseriformes-mda5

ATGTCGGCGGAGTGCCGAGACGAGTGCTTCCTCTACATGATCTCCTGCTTCAGGCCGCGG  
CTGAAGCAGTGATCCGGGTGCTGCCGGTGCTGGACTGGCTGCCCTCGCTGAGCCGGGA  
GGAGAAGGAGAAGGTGCGGGTGCGGGCGGAACAGCGGGGCGAGGTGGAGGGGGCCGA  
GGAAGTCTGCGCGCTGTGGAGCGCGGCCCGGGGCCAAGGTTGGTTCCGCGAGTTCC  
TGCAGGCGCTGGAGAAAGGTGGCTGTGACCTGGCTGCCCGCTACATGAACCC-----  
AGCCAGCTGCCCTACCCACCGAGGAGGCCGACCACGATCTCTGCGTGCACTTGGTGCA  
GCTGCTCCACGCCACCCTGGTGGATAGGATGCAGACCAGGCAGGTGGCCGAGAGGTGCC  
TGCAGATGGACATTTTCCAGGAGGAGGACCTGGAACGGATCAGTGCTGTTACTGACACTC  
GTGGGAACAGAGATGGTGCAAGGGAGCTGTTGAGTAGAATAGTGCAAAAAAGGATTGGT  
TCTCTCCTTTTTTGGTTGCTCTGCGTCAAACACAACATGAAGACCTTGCAGATGATTTAAGC  
GGAAATACGGCAGGAAAAGAGAATAAAGAAAACAGGGTGAAGGACAGTACAAACAAAGAA  
GCAGAACCTGCAAGCCAACCAGGACATGCTGTAGTGGAGGATTTGAAACAGCAAGAAAAT  
CTGGATAGTGGTTCTGTCAAGTGAATGGTGTATTGGAACATCTGTTGAAAAGAATTCTGT  
AGTTTTGGAATCAGATGCCGCTACAGAAGATAGAAGTGTCAGTAACATGAATGAAACCTG  
GGACAGAGCAGTACAACCAGTGATTCAGATGAAGATGAAGTGGAGAGCAGAGCTTCACCT  
GAACCAGATCTGATCCTGAGAGATTACCAGATGGAAGTTGCAAAGCCAGCACTGAATGGG  
GAGAATATTATAATATGTCTCCCTACAGGCAGTGGTAAAACCAGAGTGGCTGTTTACATTAC  
CAAAGATCACTTGGATAAGAAAAAAGAGCATCAGAGCCTGGAAAAGTTATAGTACTCGTT  
AATAAGGTACCATTAGTGGAACAGCATTTACGAAAAGAGTTTAAATCCATTCTGAAACGTTG  
GTATCAGGTTATTGGTTTAAAGTGGTGATTCTCAGCTGAAAATCTCATTTCTGAAAGTTGTCA  
GAAGATATGATGTAATCATCAGTACAGCACAGATTCTTGAGAATTCAGTGTAAATGCAACT  
GAAGAAGATGAAGAAGGTGTCCACTTATCAGATTTTTCACTCATCATTATTGATGAGTGTCA  
TCACACTCAAAGGAAGGCGTCTACAACAATATAATGCGACGCTACGTAAAAGAGAAGATG

AAGAACAGAAAACCTGGCGAAAGAAAACAAACCATTGATTCCACAGCCTCAGATTCTGGGAC  
TTACAGCCTCACCTGGAGTAGGAGGTGCAAATTCACCCAAAAGCTGAAGAACATATTCT  
AAAAATCTGTGCCAATCTCGATGCACGTAGAATCATGACTGTTGAAGAACATGCCTCCCAA  
CTGAAAAATCAGGTGAAGGAACCATTTAAGAAGACTGTGATTGCAGATGACCAAAGAAGGG  
ATCCATTGAGAGAAAGAATTATTGAGATCATGACAGATATTCAAACTATTGCAAGCTCTAT  
CCAAAATCTGAGTTTGGATCTCAGCCATATGAACAGTGGGTGATTAGAGAAGAGAAAAAG  
CTGCAAAAAGAAGAAAAACGCAAGGAACGTGTCTGTGCAGAACACTTGAAGAAATATAATGA  
TGCTCTGCAAATTAATGACACTATCCGAATGGTCGATGCATACAATCACCTAAATAACTTTT  
ATAAGGAGGAAAAAAGCAAGAAAACAGTAGGAAGTGATGATGATGATGAACCAGCAGTATC  
AAAACAGGATGAAACAGATGAATTTCTAATAGATTTATTTTCATGCAAAAAAGAAACATCTAAA  
AGAGTTGGCTAGAAATCCAGAATATGAAAATGAGAAGCTGATAAAGTTGCGAAACACTTTAA  
TGGAGGAGTTCACAAAGACTAAAGAACCTAGAGGAATTATTTTCACAAAGACCCGGCAAAG  
TGCTTTTGTCTATTCCAGTGGATTATGGATAACCCAAAATTTGAAGAAGTGGGGATTAAGG  
CTCATTATCTTATTGGTGTCTGGACACAACAGTGAACTAAACCCATGACTCAGAATGAGCAA  
AGGGAAGTCATTGATAAATTCCGAGGTGGAAGTGTAATTTACTTATTGCTACTACTGTAGC  
TGAAGAAGGCCTCGACATCAAAGAGTGTAACATCGTTATTCGCTATGGCCTTGTACCAAT  
GAAATTGCTATGTTGCAGGCCCGTGGTCGAGCTCGAGCTGATGAGAGCACCTATGCACTT  
GTGGCCTCGAGTGGCTCGGGAGCTGTTGAACGTGAAGATGTAAATATTTTCCGTGAGAAAA  
TGATGTATAAGGCCATTGAGCGTGTCCAGAGGATGCCGCAGGAAGAATATTTAAATAAGAT  
TGAGAGCTTCCAGTTGCAAAGTATAATGGAAAAACAAATGAAGGCAAAAAGAGATCAGCGT  
AAGACATATAAGAAAAACCCCTTCACTAATAACATTCTATGCAAGAATTGCCACAAGCTGAT  
ATGTTTCAGGAGAAGATATACAAGTTATTGAAAACATGCATCATGTGAGTGTGAAAAAGATT  
TCCAACATCTTTACCATACAAGAGAAAAATAAGACACTGCAAGATAAACATGCTGATTACCAG  
ACAAATGTGGAAATTATATGTAAAGATTGCGGACAAGCTTGGGGAAATATGATGGTTCCAC  
GAGGTCTTGACCTGCCTTGTCTAAAGATTAGAAATTTTGTGGTTGTTTTTGAAGACAAGAAA  
ACAACAAAGGAAATTTTTTAAGAAATGGGTAGAACTGCCCATCAGGTTCCCCAGTTTTGACTA  
TGCAGCTCATTGTCCTTCAAGTGATGAAGAC

>anas\_platyrhynchos-anseriformes-mda5

ATGTGCGACGGAGTGCCGAGACGAGTGCTTCCTCTACATGATCTCCTGCTTCAGGCCGCGG  
CTGAAGCAATACATCCGGGTGATGCCGGTGCTGGACCGGCTGCCCTCGCTGAGCTGGGA  
GGATAGGGAGAAGGTGCGGGTGGCGGCGGAGCAGCGGGGCGACGTGGAGGGGGCCGA  
GGAGCTGCTGCGCGCCGTGGAGCGTGGCCCCCGCGACCCAGGTTGGTTTCTGAGTTTCG  
TGCAGGCGCTGGAGTACGGCGGCTGCGACCTGGCTGCCCGCTACTTGAACCTCC-----  
AGCCAGCTGCCCTCGCCACCGAGGAGGCTGACCACGACCTCTGTGTGCAATTGGTGCA  
GCTTCTCCACGCCACCTTGGTGGATAAGATGCGGGGCCAGGCAGGTGGCCGAGATGTGCC  
TGCAGATGAACATTTTCCAGGAGGAGGACTTGGAACGGATCAGTGCTGTTACTCAAACCTCG  
TGGGAACAGAGATGGTGCAAGAGAGCTATTGAGTAGAATAGTGCAGAAAAAGGATTGGTT  
CTCTCCTTTCTTGGTTGCTCTGCGTGAAACACAACATGAAGACCTTGCAGATGATTTAAGTG  
GAAATACAGGAGGAAAAGAGAATAAAGGAAACGGGGTGAAGAACAGTACAAACAACGAAA  
CAGAAGCTGCAAGCCAACCAGGACATTCTGTAGTGAAGGATTTGAAACAGCAAGAAAATCT  
GAATGGTGGTTCTGTGAGTGAAGTGGTGTATTGGAAACATCTGTTGAAAAGAATTCCGTA  
GTTTTGGAATCGGATGTGCTACAGAAGATAGAAGTGTGAGTAACATGAATGAAAACCTGG  
GACAGAGCAGTACAACCAGTAATTCAGATGAAGATGAAATGGAGAGCAGAGCTTCACCTGA  
ACCAGATCTGATCCTGAGAGACTACCAGATGGAAGTTGCAAAGCCAGCACTGAATGGGGA

GAATATTATAATATGTCTCCCTACAGGCAGTGGTAAAACCAGAGTGGCTGTTTACATTACCA  
AAGATCATTGATAAGAAAAAAGAGCATCAGAACCTGGAAAAGTTATAGTACTTGTTAAT  
AAGGTACCGCTAGTGGAACAGCATTTACGAAAAGAGTTTAAATCCATTCCCTGAAACGTTGGT  
ATCAGGTTATTGGTTTAAAGTGGTGATTCTCAGCTGAAAATCTCATTTCTGAAAGTTGTCAGA  
AGATATGATGTGATCATCAGTACAGCACAGATTCTTGAGAATTCAGTGTAAATGCAACTGA  
AGAAGATGAAGAAGGTGTCCGCTTATCAGATTTTTCACTCATCATTATTGACGAGTGTGCATC  
ACACTCAAAGGAAGGCGTCTACAACAATATAATGCGACGTTACATAAAAAGAAAAGATGAA  
GAACAGAAAACCTGGCGAAAAGAAAACAAACCATTGATTCCACAGCCTCAGATTCTGGGACTT  
ACAGCATCACCTGGAGTAGGAGGTGCAAAATCCAACCAAAAAGCTGAAGAACATATTCTAA  
AAATCTGTGCCAATCTTGATGCACGTAGAATCATGACTGTTGAAGAACATGCCTCCCAACT  
GAAAAATCAGGTGAAGGAGCCATTTAAGAAGACCGTGATTGCAGATGACAAAAGAAAGGAT  
CCATTCAGAGAAAGAATTATTGAGATCATGACAGATATTCAAAGTATTGCAAACCTCTATCC  
AAAATCTGAGTTTGGATCTCAGCCATATGAACAGTGGGTGATTAGAGAAGAGAAAAAAGCT  
GCAAAGGAAGAAAAACGCAAGGAACGTGTCTGTGCAGAACACTTGAAGAAATATAATGATG  
CTTTGCAAATTAATGACACTATCCGAATGGTCGATGCATACAATCACCTAAATAACTTTTATA  
AGGAGGAAAAAAGCAAGAAAACAATAGGAAGT---

GATGATGATGAACCAGCAGTATCAAAACAGGATGAAACAGATGAATTTCTACTAGATTTATT  
TCATGCAAAAAAGAAACAGCTAAAAGAGTTGGCTAGAAAGCCAGAATATGAAAATGAGAAA  
CTGGTAAAGTTGCGAAACACTTTAATGGAGGAGTTTCAAAAGACTAAAGAACCTAGAGGAA  
TTATTTTCACAAAGACTCGGCAAAGTGCCCTTTGCCCTTATTCCAGTGGATTAAGGATAACCCA  
AAATTTGAAGAAGTGGGGATTAAGGCTCATTATCTTATTGGTGCTGGACACAACAGTGAAA  
CTAAACCCATGACTCAGAAATGAGCAAAGGGAAGTCATTGATAAATTCCGAGGTGGAAGTGT  
AAATTTACTTATTGCTACTACTGTAGCTGAAGAAGGCCTGGACATCAAAGAGTGCAACATTG  
TTATTCGCTATGGCCTTGTCACTAATGAAATTGCTATGTTGCAGGCCCGTGGTTCGAGCTCG  
AGCTGATGAGAGCACCTATGCACTTGTGGCTTCGAGTGGCTCAGGAGCTGTTGAACGTGA  
AGACGTAAATATTTACCGTGAGAAAATGATGTATAAGGCCATTGAGCGTGTCCAGAGGATG  
CCACAGGAAGAATATTTACATAAGATTGAGAGCTTCCAGTTGCAGAGTATAATGAAAAACA  
AATGAAGGCAAAAAGAGATCAGCGTAAAACATATAAGAAAAACCCTTCACTAATAACATTCC  
TATGCAAGAATTGCTATAAGCTGATATGTTGAGGAGAAGATATACAAGTTATTGAAAACATG  
CATCATGTCAGCGTGAAAAAAGATTTCCAACATCTTTACCATACAAGAGAAAAATAAGACACT  
TCAAGATAAACATGCTGATTACCAGACAAATGTGGAAATTATATGTAAAGATTGTGGACAAG  
CTTGGGGAAATATGATGGTTCACCGAGGTCTTGACCTGCCTTGTCTAAAGATTAGAAATTTT  
GTGGTTGTTTTTGAAGACAAGAAAGCAACAAAGGAAATTTTTAAGAAATGGGTAGAACTGC  
CCATCAGGTTCCCCAGTTTTGACTATGCAGCTCATTGTCCTTCAAGTGATGAAGAC

>aythya\_fuligula-anseriformes-mda5

ATGTCGACGGAGTGCCGAGACGAGTGCTTCCTCTACATGATCTCCTGCTTCAGGCCGCGG  
CTGAAGCAATACATCCGGGTGCTGCCGGTGCTGGACTGGCTGCCCTCGCTGAGCCGGGA  
GGAGAAGGAGAAGGTGCGGGTGGTGGCGGAGCAGAGGGGGCGATGTGGAGGGGGCCGA  
GGAGCTGCTGCGCGCCGTGGAGCGCGGCCCCCGCGACCAAGGTTGGTTTCTGAGTTCCG  
TGCAGGCGCTGGAGAACAGCGGCTGCAACCTGGCTGCCAGCTACGTGAACCC-----  
AGCCAGCTGCCCTCGCCACCGAGGAGGCTGACCACGACCTCTGTGTGCAGTTGGTGCA  
GCTGCTCCACGCCACCCTAGTGGATAAGATGCGGGCCAGGCAGGTGGCCGAGATGTGCC  
TGCAGATGAACATTTTCCAGGAGGAGGACCTGGAACGGATCAGTGCTGTTACTGAACTC  
GTGGGAACAGAGATGGTGCAAGAGAGCTATTGAGTAGAATAGTGCAGAAAAAGGATTGGT

TCTCTCCTTTCTTGGTTGCTCTGCGTCAAACACAACATGAAGACCTTGCAGATGATTTAAGC  
GGAAATACAGGAGGAAAAGATAATAAAGGAAACGGGGTGAAGAACAGTACAAACAAAGAA  
ACAGAAGCTGCAAGCCAACCAGGACATTCTGGAGTGAAGGATTTGAAACAGCAAGAAAATC  
TGAATAGTGGTTCTGTCAGTGAAAATGGTGTATTGGAAACATCTGTTGAAAAGAATTCTGTA  
GTTTTGGAATCGGATGTCACTACAGAAGATAGAAGTGTCAGTAAACATGAATGAAAACCTGG  
GACAGAGCAGTACAACCAGTAATTCAGATGAAGATGAAATGGAGAGCAGAGCTTCACCTGA  
ACCAGATCTGATACTGAGAGACTACCAGATGGAAGTTGCAAAGCCAGCACTGAATGGGGA  
GAATATTATAATATGTCTCCCTACAGGCAGTGGTAAAACCAGAGTGGCTGTTTATATTACCA  
AAGATCATTGGATAAGAAAAAAGAGCATCAGAACCTGGAAAAGTTATAGTACTTGTTAAT  
AAGGTACCGTTAGTGGAACAGCATTTACGAAAAGAGTTTAATCCATTCCTGAAACGTTGGTA  
TCAGGTTATTGGTTTAAAGTGGTGATTCTCAGCTGAAAATCTCATTTCTGAAAGTTGTCAGAA  
GATATGATGTAATCATCAGTACAGCACAGATTCTTGAGAATTCAGTGTAAATGCAACTGAA  
GAAGATGAAGAAGGTGTCCACTTATCAGATTTTTCACTCATCATTATTGATGAGTGTCA  
CACTCAAAAGGAAGGCGTCTACAACAATATAATGCGACGTTACATAAAAGAAAAGATGAAG  
AACAGAAAACCTGGCAAAAGAAAACAAACCATTGATTCCACAGCCTCAGATTCTGGGACTTA  
CAGCCTCACCTGGAGTAGGAGGTGCAAATTCACCCAAAAGCTGAAGAACATATTCTAAA  
AATCTGTGCCAATCTTGATGCACGTAGAATCATGACTGTTGAAGAACATGCCTCCCAACTG  
AAAAATCAGGTGAAGGAGCCATTTAAGAAGACCGTGATTGCAGATGACAAAAGAAAGGATC  
CATTCAGAGAAAGAATTATTGAGATCATGACAGATATTCAAACTATTGCAAACTCTATCCA  
AAATCTGAGTTTGGATCTCAGCCGTATGAACAGTGGGTGATTAGAGAAGAGAAAAAAGCTG  
CAAAGGAAGAAAAACGCAAGGAACGTGTCTGTGCAGAACACTTGAAGAAATATAATGATGC  
TCTGCAAATTAATGACACTATCCGAATGGTCGATGCATACAATCACCTAAATAACTTTTATAA  
GGAGGAAAAAAGCAAGAAAACAATAGGGAGT---

GATGATGATGAACCAGCAGTATCAAAACAGGATGAAACAGATGAATTTCTAATAGATTTATT  
TCATGCAAAAAAGAAACAGCTAAAAGAGTTGGCTAGAAAGCCAGAATATGAAAATGAGAAA  
CTGATAAAGTTGCGAAACACTTTAATGGAAGAGTTCACAAAGACTAAAGAACCCAGAGGAA  
TTATTTTCACAAAGACTCGGCAAAGTGCTTTTGCCTTATTCCAGTGGATTATGGATAACCCA  
AAATTTGAAGAAGTGGGGATTAAAGGCTCATTATCTTATTGGTGCTGGACACAACAGTGAAA  
CTAAACCCATGACTCAGAATGAGCAAAGGGAAGTCATTGATAAATTTGAGGTGGAAGTGT  
AAATTTACTTATTGCTACTACTGTAGCTGAAGAAGGCCTGGACATCAAAGAGTGTAACATTG  
TTATTCGCTATGGCCTTGTCACTAATGAAATTGCTATGTTGCAGGCCCGTGGTTCGAGCTCG  
AGCTGATGAGAGCACCTATGCACTTGTGGCTTCGAGTGGCTCAGGAGCTGTTGAACGTGA  
AGACGTAAATATTTACCGTGAGAAAATGATGTATAAGGCCATTCAGCGTGTCCAGAGGATG  
CCGCAGGAAGAATATTTAAATAAGATTGAGAGCTTCCAGTTGCAGAGTATAATGGAAAAAC  
AAATGAAGGCCAAAAAGAGATCAGCGTAAAACATATAAGAAAAACCCTTCACTAATAACATTC  
CTATGCAAGAATTGCCACAAGCTGATATGTTCAAGGAGAAGATATACAAGTTATTGAAAACAT  
GCATCATGTGAGCGTGAAAAAAGATTTCCAACATCTTACCATACAAGAGAAAATAAGACAC  
TGCAAGATAAACATGCTGATAACCAGACAAATGTGGAAATTATATGTAAAGATTGTGGACAA  
GCTTGGGGAAATATGATGGTTCAACGAGGTCTTGACCTGCCTTGTCTAAAGATTAGAAATT  
TTGTGGTTGTTTTTGAAGACAAGAAAGCAACAAAGGAAATTTTTAAGAAATGGGTAGAAGT  
CCCATCAGGTTCCCCAGTTTTGACTATGCAGCTCATTGTCCTTCAAGTGATGAAGAC

>cairina\_moschata-anseriformes-md5

ATGTCGACGGAGTGCCGAGACGAGTGCTTCCTCTACATGATCTCCTGCTTCAGGCCGCGG  
CTGAAGCAATACATCCAGGTGCTGCCGGTGCTGGACCGGCTGCCCTCGCTGAGCCTGGA

GGAGAAGGAGAAGGTGCGGGTGGCGGCGGAGCAGAGGGGCGCTGTGGAGGGGGCTGA  
GGAGCTGCTGCGCGCCGTGGAGCGCGGCCCCCGCGGCCAAGGTTGGTTTCCTGAGTTCG  
TGCAGGCGCTGGAGAACAGCGGCTGCGACCTGGCTGCCCGCTACGTGAACCCC-----  
AGCCAGCTGCCCTCGCCCACCGAGGAGGCTGACCACGACCTCTGTGTGCAATTGGTGCA  
GCTGCTCCACGCCACCCTGGTGGATAAGATGCAGGCCAGGCAGGTGGCCGAGATGTGCC  
TGCAGATGAACATTTTCCAGGAGGAGGACCTGGAACGGATCAGTGCTGTTACTGAACTC  
GTGGGAACAGAGATGGTGCAAGAGAGCTATTGAGTAGAATAGTGCAGAAAAAGGATTGGT  
TTTCTCCTTTCTTGGTTGCTCTGCGTCAAACACAACATGAAGACCTTGCAGATGATTTAAGT  
GGAAATACAGGAGGAAAAAGAGAATAAAGGAAACGGGGTGAAGAACAGTGCAAACAAAGAA  
ACAGAAGCTGCAAGCCAACCAGGACATTCTGTAGTGAAGGATTTGAAACAGCAAGAAAATC  
TGAATAGTGGTTCTGTGAGTGAAGGTTGGTGTATTGGAAACATCTGTTGAAAAGAATTCTGTA  
GTTTTGGAATTGGATGTGCTACAGAAGATAGAAGTGTGAGTAACATGGATGAAAACCTGG  
GACAGAGCAGTACAACCAGTAATTCAGATGAAGATGAAATGGAGAGCAGAGCTTCACCTGA  
ACCAGATCTGATCCTGAGAGACTACCAGATGGAAGTTGCAAAGCCAGCACTGAATGGGGA  
GAATATTATAATATGCCTCCCTACAGGCAGTGGTAAAACCAGAGTGGCTGTTTACATTACCA  
AAGATCATTTGGATAAGAAAAAAGAGCATCAGAACCTGGAAAAGTTATAGTACTTGTTAAT  
AAGGTACCGTTAGTGGAACAGCATTACGAAAAGAGTTTAAATCCATTCCCTGAAACGTTGGTA  
TCAGGTTATTGGTTTAAAGTGGTGAATCTCAGCTGAAAATCTCATTTCCCTGAAAGTTGTCAGAA  
GATATGATGTAATCATCAGTACAGCACAGATTCTTGAGAATTCAGTGTTAAGTGCAACTGAA  
GAAGATGAAGAAGGTGTCCACTTATCAGATTTTTCACTCATCATTATTGATGAGTGTGATCA  
CACTCAAAAGGAAGGCGTCTACAACAATATAATGCGACGTTACATAAAAGAAAAGATGAAG  
AACAGAAAAGTGGCTAAAGAAAACAAACCATTGGTTCCACAGCCTCAGATTCTGGGACTTA  
CAGCCTCACCTGGAGTAGGAGGTGCAAATCCAACTCAAAGCTGAAGAACATATTCTAAA  
AATCTGTGCCAATCTCGATGCACGTAGAATCATGACTGTTGAAGAACATGCCTCCCACTG  
AAAAATCAGGTGAAGGAGCCATTAAAGAAGACCGTGATTGCAGATGACAAAAGAAAGGATC  
CATTCAGAGAAAGAATTATTGAGATCATGACAGATATTCAAACCTATTGCAAACCTCTATCCA  
AAATCTGAGTTTGGATCTCAGCCATATGAACAGTGGGTGATTAGAGAAGAGAAAAAGCTG  
CAAAGGAAGAAAAACGCAAGGAACGTGTCTGTGCAGAACACTTGAAGAAATATAATGATGC  
TCTGCAAATTAATGACACTATCCGAATGGTTCGATGCATACAATCACCTAAATAACTTTTATAA  
GGAGGAAAAAAGCAAGAAAACAATAGGAAGT---  
GATGATGATGAACCAGCAGTAACAAAACAGGATGAAACAGATGAATTTCTAATAGATTTATT  
TCATGCAAAAAAGAAACAGCTAAAAGAGTTGGCTAGAAAGCCAGAATATGAAAATGAGAAA  
CTGATAAAGTTGCGAAACACTTTAATGGAGGAGTTCACAAAGACTAAAGAACCTAGAGGAA  
TTATTTTCAAAAGACTCGGCAAAGTGCCCTTTGCCCTTATTCCAGTGGATTATGGATAACCCA  
AAATTTGAAGAAGTGGGGATTAAGGCTCATTATCTTATTGGTGCTGGACACAACAGTGAAA  
CTAAACCCATGACTCAGAATGAGCAAAGGGAAGTCATTGATAAATTCCGAGGTGGAAGTGT  
AAATTTACTTATTGCTACTACTGTAGCTGAAGAAGGTCTGGACATCAAAGAGTGTAAACATTG  
TTATTCGTTATGGCCTTGTACCAATGAAATTGCTATGTTGCAGGCCCCGTGGTCGAGCTCG  
AGCTGATGAGAGCACCTATGCACTTGTGGCTTCGAGTGGCTCAGGAGCTGTTGAACGTGA  
AGACGTAAATATTTACCGTGAGAAAATGATGTATAAGGCCATTCAGCGTGTCCAGAGGATG  
CCGCAGGACGAATATTTAAATAAGATTGAGAGCTTCCAGTTGCAGAGTATAATGGAAAAAC  
AAATGAAGGCAAAAAGAGATCAGCGTAAACATATAAGAAAAACCTTCACTAATAACATTC  
CTATGCAAGAATTGCCACAAGCTGATATGTTGAGGAGAAGATATACAAGTTATTGAAAACAT  
GCATCATGTGAGCGTGAAAAAAGATTTCCAACATCTTTACCATACAAGAGAAAATAAGACAC

TGCAAGATAAACATGCTGATTACCAGACAAATGTGGAAATTATATGTAAAGATTGTGGACAA  
GCTTGGGGAAATATGATGGTTCACCGAGGTCTTGACCTGCCTTGTCTAAAGATCAGAAATT  
TTGTGGTTGTTTTTGAAGACAAGAAAGGAACAAAGGAAATTTTTAAGAAATGGGTAGAACTG  
CCCATCAGGTTCCCCAGTTTTGACTATGCAGCTCATTGTCCTTCAAGTGATGAAGAC

>melanerpes\_aurifrons-piciformes-mda5

ATGGTAGAGTCGTCCCGAGACGAGCGCTTCCTCTACATGATCTCCTGCTTTAGGCCGCGG  
CTGAAGCAGTGCATCCGGGTGCAGCCGGTGCTGGACCAGCTTTTCTCGCTAAGCGCCGAA  
GAAAAGGAGAAGGTGCGGGTGGCCGCCTTGACGCGGGGCGATGTGGAGGGGGCAGAGG  
AACTGCTGCGGGCCGTGGAGCGGGGTCCCCGCGGCTGTGGCTGGTTCCTCGAGTTCCTG  
CAGGCGCTTGAGAACGGCGGGTGCAGCCTGGCCGCCTGCTACATAAACCCAGCCTCAG  
CCAGCTGCCCTCGCCGGCCGAGGAGGCCGACCATGACCTCTGCGTGCAGTTGGTGCAAC  
TACTCCACAGCACGCTGGTGGATAAAATACGGACCGTAGAATTGGCAGAGAAGTGCATGG  
AGATGGGCATCTTCCAGGAAGAGGATCTGGATCGGATCTATGCTGTTACTGACAATCGTGG  
GAACAGAGATGGTGAAGGGAGCTATTGAGCAGAATAGTGCAGAAGAAGGACTGGTTCTC  
TCATTTTTTGTCTGCTCTGCGTGAAACCCAACATGGAAGCCTTGACAGATGAATTAAGTGGA  
ATACAAAAGGAACAGAGAACAGTCAAAATGGGATGAGGAACAGTACAAATGAAGAA-----  
-----

TTGGAGGATTTGAAACAGCAAGAAAATGTGAATGATAGTTTCAACAGTGAGAACAAATATATT  
GGAAACATCTGGTGGAAAGAACTCTGTCAATTCAGACTCAGGTGTCTCCACAGGAGATGGA  
AGTGTCAGTAGCTTGAATGAAAACCTGGGACAGTCCTACAATACCAGTGATTCAGATGAAG  
ATGAAGGGGAGAACAGAGCTTCACCGGAGCCAGATTTGATCCTGAGAGATTACCAGATGG  
AAGTTGCAAAGCCAGCCCTGAATGGAGAGAATATTATAATATGTCTTCCTACAGGCAGTGG  
TAAAACCAGAGTGGCTGTTTACATTACCAAAGATCACTTGGATAAGAAGAAAAGAGCGTTA  
GAGCCTGGAAAAGTTATAGTACTTGTAAACAAGGTCTCGTTGGTAGAACAGCATTACAAAC  
GGAGTTTAATCCATTCTTGAAGCGCTGGTATCACGTTACTGGTTTAAGTGGTGATACTCAG  
CTGAAAATCTCATTTCCTGAAGTTGTCAGAAGACATGATGTCATCATCAGTACAGCACAGAT  
CCTAGAGAATTCAGTATAAATGCAGCTAAAGAAGATGAAGAAGGTGTCCACTTATCAGATT  
TTTCACTTATCATTATTGATGAATGTCATCACACTCAAAGGAAGGTGTCTACAACAACATAA  
TGCGACGTTACTTAAAACAAAAGATTAAGAACAAGAAGCTAGCAAAGAAAACAAACCACT  
GATCCACAGCCTCAGATTCTGGGACTTACAGCCTCACCAGGTGTAGGAGGTGCAACATC  
TTCCTTAAAAGCTGAAGAACATATTCTGAGAATCTGTGCCAATCTTGATGCCCATAGATTTA  
TGACTGTTGAAGAGCATGCCTCCCAGTTGAAGAATCAGGTGAAAGAGCCATATAAAAAAAC  
TGTGATTGCAGATGGCAAAGAAAGGATCCATTTAGAGAGAGAATTACTGAGATCATGACA  
GACATTCAAACCTATTGCCAGCTCCATCCAAAATGTGAGTTTGGAAGTCAAGCATATGAACA  
GTGGGTGATTAGAGAAGAGAGAAGAGCTGCAAAGAAAAAAACCGCAAGGAACGTGTCTG  
TGCAGAACACCTGAAGAAATACAATGATGCTCTCCAGATCAATGATACCATCCGAATGATA  
GATGCATACAATCACCTACGTGACTTTTATAAGGAGGAGAAAAGTAAAAGATGGTAAGGA  
GTGATGATGATGACAAACCAGCAGTAACAAAACAGGATGAAACAGATGAATTTCTAATAGG  
TTTATTTTCATGCGAAAAGGAAACAGCTGAAAGAGTTGGCTAGAAATCCAGAATATGAAAATG  
AGAAGCTAATAAAGCTGCGAAACACTTTAATGGAGGAGTTCACAAAGACTGAAGAACCTAG  
AGGAATTATTTTCACAAAGACTCGGCTAAGTGCCTTTGCTCTGTTCCAGTGGATTAAGGATA  
ACCCAAAATTTGAAGAAGTGGGAATTAAGGCCATTACCTCATCGGTGCTGGACATAACAG  
TGAAACTAAACATATGACTCAGAATGCACAAAGGGATGTTATTGATAAATTCCGAAGTGGA  
ATGTAAATTTACTTATCGCTACCACTGTAGCTGAGGAAGGCCTAGATATCAAAGAGTGTAAC

ATTGTTATTCGCTATGGCCTTGTCACCAATGAAATTGCTATGATACAGGCTCGTGGTCGAG  
CTCGAGCTGCTGAGAGCACCTATGCACTTGTGGCTTCAGTTGGCTCAGGAGCCACTGAAC  
GTGAGGATGTTAATGTTTTCCGTGAGAAAATGATGTATAAGGCCATTCAACGTCTCCAGAA  
GATGCCACAGGAAGAGTATTTAAATAAGATTCAGGAATTCCAGTTGCAAAGTGTAAGTGGAA  
AGACGCATGAAGGCAAAGAGAGATCAACACAAGACACACAAGAAAAATTCTTCATTAATAA  
AATTCCTATGCAAAAATTGCCACAACTGATATGCTCTGGAGAAGATATTCAAGTTATTGAA  
AACATGCATCATGTGAGTGTGAAAAAAGATTTCCAAAGTCTTTATCATACAAGAGAAAAATAA  
GAACTGCAAGATAACCATGCTGGTTACCAGACAAATGGGGAGATTATATGTAAAGACTGT  
GGACAAGCTTGGGGAAATATCATGGTTCACCGAGGTCTTGACCTACCTTGCTAAAGATTA  
GCAATTTTGTGGTTGTGTTTGAAGACAAAAAGCCAACAGAAGATATTTTTAAAAAATGGA  
GATCTGCCTGTAAAGTTCCCTAGGTTTGATTATGCAGCTCATTGTTCTTCAAGTGATGAAGA  
T

>dendrocopos\_noguchii-piciformes-mda5

ATGGTAGAGTCCTCCCGAGACAAGCGCTTCCTCTACATGATCTCCTGCTTTAGGCCGCGG  
CTGAAGCAGTGCATCCGGGTGCAGCCGGTGCTGGACCAGCTTTTCTCGCTAAGCGCCGAA  
GAAAAGGAGAAGGTGCGGGTGGCCGCTTGACGCGGGGCGATGTGGAGGGAGCAGAGG  
AACTGCTGCGGGCCGTGGAGCGGGGGCCCCGCGGCTGTGGCTGGTTCTCGAGTTCTG  
CAGGCGCTTGAGAACGGCGGGTGCAGCCTGGCCGCTGCTACATAAACCCAGCCTCAG  
CCAGCTGCCCTCGCCGGCCGAGGAGGCCGACCATGACCTCTGCGTGCAGTTGGTGCAAC  
TACTCCACAGCACGCTGGTGGATAAAATACGGACCGTAGAATTGGCAGAGAAGTGCATGG  
AGATGGGCATCTTCCAGGAAGAGGACTTGGATCGGATCCATGCTGTTACTGACAATCGTG  
GGAACAGAGATGGTGCAAGGGAGCTATTGAGCAGAATAGTGCAGAAGAAGGACTGGTTCT  
CTCATTTTTTGAATTGCTCTGCGTGAAACCAACACGGAAGCCTTGACAGATGAATTAAGTGG  
AAATACAAAAGGAACAGAGAACAGACAAAATGGGATGAAGAACAGTACAAATGAAGAA-----

-----  
TTGGAGGATTTGAAACAGCAGGAAAATGTGAATGATAGTTTCAACAGTGAGAACAATATATT  
GGAAACATCTGTTGGAAAGAATTCTGTCATTTCAGAATCAGATGTCTTCACAGGAGATGGA  
AGTGTCAGC---

TTGAATGAAAACCTGGGACAGTCCTACAATACCAAGTGATTGAGATGAAGATGAAGGGGAGA  
ACAGAGCTTCACCAGAGCCAGATTTGATCCTGAGAGATTACCAGATGGAAGTTGCAAAGCC  
AGCCCTGAATGGAGAGAATATTATAATATGTCTTCTACAGGCAGTGGTAAAACCAGAGTG  
GCTGTTTACATTACCAAAGATCACTTGGATAAGAAGAAAAGAGCATTAGAGCCTGGAAAAG  
TTATAGTACTTGTTAACAAGGTCTCATTGGTAGAACAGCATTACAAACGGAGTTTAATCCA  
TTCTTGAAGCGCTGGTATCACGTTACTGGTTAAGTGGTGATACTCAGCTGAAAATCTCATT  
TCCTGAAGTTGTCAGAAGACATGATGTCATCATCAGTACAGCACAGATCCTAGAGAATTCA  
CTGATTAATGCAGCTAAAGAAGATGAAGAAGGTGTCCACTTATCAGATTTTTCACTCATCAT  
TATTGATGAATGTCATCACACGCAAAAGGAAGGTGTCTACAACAACATAATGCGACGTTACT  
TAAAACAAAAGATTAAGAACAAGAAGCTAGCAAAAGAAAACAAGCCACTGATCCACAGCC  
TCAGATTCTGGGACTTACAGCCTCACCAGGTGTAGGAAGTGCAACATCTTCTTAAAAGCT  
GAAGAACATATTCTGAGAATCTGTGCCAATCTTGATGCCCATAGAATCATGACTGTTGAAGA  
GCATGCCTCCAGTTGAAGAATCAGGTGAAAGAACCATATAAAAAAACTGTGATTGCAGAT  
GACAAAAGAAAGGATCCATTTAGAGAGAGAATTACTGAGATCATGACAGACATTCAAAACTA  
TTGCCAGCTCCATCCAAAATCTGAGTTTGGAACTCAGCCATATGAACAGTGGGTGATTAGA  
GAAGAGAGAAGAGCTGCAAAAGAAAAAAACCGCAAGGAACGTGTCTGTGCAGAACACCTG

AAGAAATACAATGATGCTCTCCAGATAAATGACACCATCCGAATGATAGATGCATACAATCA  
CCTACGTGACTTTTTATAAGGAGGAGAAAAAGTAAAAAGATGGTAAGGAGTGATGATGATGAT  
GAACCAGCAGTAACAAAACAGGATGAAACAGATGAATTTCTAATAGATTTATTTTCATGCAAA  
AAGGAAACAGCTGAAAGACTTGGCTAGAAATCCAGAATATGAAAATGAGAAGCTAATACAG  
CTGCGAAACACTTTAATGGAGGAGTTCACAAAGACTGAGGAACCTAGAGGAATTATTTTCA  
CAAAGACTCGGCTAAGTGCCTTTGCTCTGTTCCAGTGGATTAAGGATAACCCAAAATTTGA  
AGAAGTGGGAATTAAGGCCATTACCTCATCGGAGCTGGACATAACAGTGAAACTAAACAT  
ATGACTCAGAATGCACAAAGGGATGTTATTGATAAATTCCGAAGTGGAATGTAAATTTACT  
TATTGCTACCACTGTAGCTGAGGAAGGCCTAGATATCAAAGAGTGTAACATTGTTATTCGCT  
ATGGCCTCGTCACCAATGAAATTGCTATGATGCAGGCTCGTGGTCGAGCTCGAGCTGCTG  
AGAGCACCTATGCACTTGTGGCTTCAGTTGGCTCAGGAGCTGTTGAACGTGAGGATGTTAA  
TGTTTTCCGTGAGAAAATGATGTATAAGGCCATTCAACGTCTCCAGAAGATGCCACAGGAA  
GAGTATTTAAATAAGATTTCAGGAATTCCAGTTGCAAAGTGTACTGGAAAGACGCATGAAGG  
CAAAGAGAGATCAGCACAAGACACACAAGAAAAATTCTTCCTTAATAAAATTCCTATGCAAA  
AATTGCCACAACTGATATGTTCTGGAGAAGATATTCAAGTTATTGAAAACATGCATCATGT  
CAGTGTGAAAAAAGATTTCCAAAGTCTTTATCATACAAGAGAAAAATAAGACACTGCAAGATA  
ACCATGCTGATTACCAGACAAATGGGGAGATTATATGTAAAGACTGTGGACAAGCTTGGGG  
AAATATCATGGTTCACCGAGGTCTTGACCTACCTTGTCTAAAGATTAGCAATTTTGTGGTTG  
TGTTTGAAGACAAAAAGCCAACAGAACATATTTTTAAAAAATGGAAGATCTGCCTGTTAGT  
TTCCCTAGGTTTGATTATGCAGCTCATTGTTCTTCAAGTGATGAAGAT

>picoides\_pubescens-piciformes-mda5

ATGGTAGAGTCGTCCCGAGACGAGCGCTTCCTCTACATGATCTCCTGCTTTAGGCCGCGG  
CTGAAGCAGTGATCCGGGTGCAGCCGGTGCTGGACCAGCTTTTCTCGCTAAGCGCCGAA  
GAAAAGGAGAAGGTGCGGGTGGCCGCCTTGACGCGGGGCGATGTGGAGGGAGCAGAGG  
AACTGCTGCGGGCCGTGGAGCGGGGGCCCCGCGGCTGTGGCTGGTTCCTCGAGTTCCTG  
CAGGCGCTTGAGAACGGCGGGTGCAGCCTGGCCGCCTGCTACATAAACCCAGCCTCAG  
CCAGCTGCCCTCGCCGGCCGAGGAGGCCGACCATGACCTCTGCGTGCAGTTGGTGCAGC  
TACTCCACAGCACACTGGTGGATAAAATACGGACCGTAGAATTGGCAGAGAAGTGATGG  
AGATGGGCATCTTCCAGGAAGAGGACTTGGATCGGATCCATGCTGTTACTGACAATCGTG  
GGAACAGAGATGGTGCAAGGGAGCTATTGAGCAGAATAGTGCAAGAAGGACTGGTTCT  
CTCATTTTTTGGTTGCTCTGCGTGAAACCCAACATGGAAGCCTTGACAGATGAATTAAGTGG  
AAATACAAAAGGAACAGAGAACAGGCCAAAATGGGATGAAGAACAGTACAAATGAAGAA-----

-----  
TTGGAGGATTTGAAACAGCAAGAAAATGTGAATGATAGTTTCAACAGTGAGAACAAATATATT  
GGAAACATCTGTTGGAAAGAATTCTGTCAATTCAGAATCAGATGTCTTCACAGGAGGTGGA  
AGTGTGAGC---

TTGAATGAAAACCTGGGACAGTCCTACAATACCAGTGATTGAGATGACGATGAAGGGGAGA  
ACAGAGCTTCACCAGAGCCAGATTTGATCCTGAGAGATTACCAGATGGAAGTTGCAAAGCC  
AGCCCTGAATGGAGAGAATATTATAATATGTCTTCCTACAGGCAGTGGTAAAACCAGAGTG  
GCTGTTTACATTACCAAAGATCACTTGGATAAGAAGAAAAAAGCATTAGAGCCTGGAAAAGT  
TATAGTACTTGTAACAAGGTCTCATTGGTAGAACAGCATTTACAAACGGAGTTTAATCCAT  
TCTTGAAGCGCTGGTATCACGTTACTGGTTTAAAGTGGTGATACTCAGCTGAAAATCTCATTT  
CCTGAAGTTGTCAGAAGACATGATGTCATCATCAGTACAGCACAGATCCTAGAGAATGCAC  
TGATAAATGCAGCTAAAGAAGATGAAGAAGGTGTACACTTATCAGATTTTTCACTCATCATT



ATTGATGAATGTCATCACACTCAAAGGAAGGTGTCTACAACAACATAATGCGACGTTACTT  
AAAACAAAAGATTAAGAACAAGAAGCTAGCAAAAGAAAACAAACCACTGATTCCACAGCCT  
CAGATTCTGGGACTTACAGCCTCACCAGGTGTAGGAAGTGCAACATCTTCCTTAAAGCTG  
AAGAACATATTCTGAGAATCTGTGCCAATCTTGATGCCCATAGAATCATGACTGTTGAAGAG  
CATGCCTCCCAGTTGAAGAATCAGGTGAAAGAACCATATAAAAAAACTGTGATTGCAGATG  
ACAAAAGAAAGGATCCATTTAGAGAGAGAATTACTGAGATCATGACAGACATTCAAACCTAC  
TGCCAGCTCCATCCAAAATCTGAGTTTGGAACCTCAGCCATATGAACAGTGGGTGATTAGAG  
AAGAGAGAAGAGCTGCAAAAGAAAAAAACGCAAGGAACGTGTCTGCGCAGAACACCTGA  
AGAAATACAATGATGCTCTCCAGATAAATGACACCATCCGAATGATAGATGCATACAATCAC  
CTACGTGAGTTTTATAAGGAGGAGAAAAAGTAAAAAGATGGTAAGGAGTGATGATGATGACG  
AACCAGCAGTAACAAAACAGGATGAAACAGATGAATTTCTAATAGGTTTATTTTCATGCAAAA  
AGGAAACAGCTGAAAGAGTTGGCTAGAAATCCAGAATATGAAATGAGAAGCTAATACAGC  
TGCGAAACACTTTAATGGAGGAGTTCACAAAGACTGAGGAACCTAGAGGAATTATTTTCAC  
AAAGACTCGGCTAAGTGCCTTTGCTCTGTTCCAGTGGATTAAGGATAACCCAAAATTTGAA  
GAAGTGGAATTAAGGCCCATACCTCATTGGAGCTGGACATAACAGTGAAACTAAACATA  
TGACTCAGAATGCACAAAGGGATGTTATTGATAAATCCGAAGTGGAATGTAAATTTACTT  
ATTGCTACCACTGTAGCTGAGGAAGGCCTAGATATCAAAGAGTGTAACATTGTTATTCGCTA  
TGGCCTCGTCACCAATGAAATTGCTATGATGCAGGCTCGTGGTCGAGCTCGAGCTCCTGA  
GAGCACCTATGCACTTGTGGCTTCAGTTGGCTCAGGAGCTGTTGAACGTGAGGATGTTAAT  
GTTTTCCGTGAGAAAATGATGTATAAGGCCATTCAACGTCTCCAGAAGATGCCACAGGAAG  
AGTATTTAAATAAGATTCAGGAATTCCAGTTGCAAAGTGTAAGTGGAAAGACGCATGAAGGC  
AAAGAGAGATCAGCACAAGACACACAAGAAAAATTCTTCATTAATAAAATTCCTATGCAAAA  
ATTGCCACAACTGATATGTTCTGGAGAAGATATTCAAGTTATTGAAAAGATGCATCATGTC  
AGTGTGAAAAAAGATTTCCAAAGTCTTTATCATACAAGAGAAAATAAGACACTGCAAGATAA  
CCATGCTGATTCCCAGACAAATGGGGAGATTATATGTAAAGACTGTGGACAAGCTTGGGGA  
AATATCATGGTTCACCGAGGTCTTGCCCTACCTTGTCTAAAGATTAGCAATTTTGTGGTTGT  
GTTTGAAGACAAAAAGCCAACAAAAGATATTTTTAAAAAATGGAAAGATCTGCCTGTTAGTT  
TCCCTAGGTTTGATTATGCAGCTCATTGTTCTTCAAGTGATGAAGAT

>calypte\_anna-apodiformes-mda5

ACGGCTGAGGAGTGCCAGGACGAGCGCTTCCTCTACATGATCTCCTGCTTCAGGCCGCGG  
ATCAAGCAGGTTATCCGGGTGCAGCCGGTGCTGGACCACCTTCTCTCCCTGAGCACAGAG  
GAGAAGGAGAAGGTGCGGGCGGCCGCCCTGCAGCGGGGCGAGGTGGAGGGTGCGGAG  
GAACTGCTGCGGGCCGTGGAGCGGGGGCCCCGCGGGTGCGGGTGGTTCCACGAGTTTC  
TGCAGGCGCTGGAGCACGCTGGCTGCAGCTTGCCCGCCTGCTATGTGAATCCGAGCCTC  
AGCCACCTCCCCTCGCCGGCCAGGAGGCTGACCACGACCTCTGCGTGCACTTGGTGCA  
GCTGCTCCACGCCACGTTGGTGGATAAAATGCAGACCATCCAAGTGGCCGAGAAGTGTCT  
GCAGATGGGCATATTCCATGATGAGGATCTGGATCGGATCCCACTGTTACTGACAATTGT  
GGGAACAGAGATGGTGCAAGAGAGCTACTGAGAAGAATAGTGCAGAAGAAAGATTGGTTC  
TCTCCTTTTTTGAGTGCTCTCCGTGAAACCCAACATGGACACCTTGCAGATGATTTAAGTGG  
AAACCCAGGAGGAACAGAGAATAGACAAAATGGGGTGAAGAAGAGTTCAAATGAAGAAAC  
AGAGACTACATGCCAACCAAGATATGCCATGGTGGGAAGATTTGAAACAGCAAGAAAATGTG  
AAAGATAATTGCAGCAGTGAACACAGTGAAGTGGGAATACCTATTGAAAAGAATTCTGTATT  
TTCAGAGTCGGATATCTCCATAGGAGATGAAAGTGTGAGTAACTTGGATGAAAACCTGGGA  
CAAAGCTGCATAACCAGTGATTGAGATGAAGATGAAGTGGAGAGCAGAGCTTCACCTAAGC

CAGATCTGATCCTGAGAGATTACCAGATGGAAGTTGCAAAGCCAGCACTGAATGGGGAGA  
ATATTATAATATGTCTACCTACAGGCAGTGGTAAAACCAGAGTGGCTGTTTACATTACCAA  
GATCACTTGGATAAAAAAGAAAAGGGCCTCAGAGCCTGGAAAAGTTATAGTACTTGTTAATAA  
GGTACCATTGGTAGAACAGCATTTACAAACGGAGTTTAAACCATTCTGAAGCCGTGGTAT  
CGGGTTATTGGTCTAAGTGGTGATTCTCAGCTGAAAATCTCATTCCCTGAAGTTGTCAGAA  
GAAATGATGTCATAATTAGTACAGCACAAATCCTAGAGAATTCAGTGTTAAATGCAGAAGAA  
GAAGATGAAGAAGGTGTCCACTTATCAGATTTTTCACTCATCATTATTGATGAGTGTTCATCA  
TACTCAAAGGAAGGTGTCTACAACAATATAATGAGACGTTACTTAAAAGAAAAGATGATGA  
ACAGGAAGCTGGCGAAAAGAAAACAAACCACTGATCCCTCAGCCTCAGATTCTGGGACTTAC  
AGCTTCCCCTGGCGTAGGAAGTGCAAATCCTACTCAAAGCTGAAGAACATATTCTGAAA  
ATCTGTGCCAATCTTGATGCATGTAGAATCATGACTGTTGAAGAGCACAGCTCCAGCTGA  
AGAGTCAGGTGAAGGAACCATATAAGAAAACGTGTGGTTGCAGATGACAAAAGAAGGGATC  
CATTCAGAGAGAGAATTACTGAGATTATGACAGCCATTCAAACCTATTGCCAATTTATCCA  
AAATCTGAGTTTGGAACTCAGCCATATGAACAGTGGGTGATTAGAGAAGAGAGAAAAGCTG  
CAAAAGAAGAAAAACGCAAGGAACGTGTCTGTGCAGAACACTTGAAGAAATATAACGATGC  
TCTCCAGATAAATGACACCATCCGAATGGTGGATGCCTACAATCACCTGAACAACCTTTTACA  
AGGAGGAGAAAAGTAAGAAGACAGTAAGGAGTGATGATGATGATGCACCAGCAGTGTCAA  
AACAGGATGAAACAGATACATTTTTTAATAGGTTTATTTTCATGCAAAAAAGAAACAGCTAAAA  
GAGTTGACTAGAAAGCCAGAATATGAAAATGAGAAGCTAATACAGTTGCGAAACACTTTAAT  
GGAGGAGTTCACGAAGACCGACGAACCTAGAGGAATTATTTTTACAAAGACTCGTCTGAGT  
GCCTTTGCTCTATTCCAGTGGATTAAGGATAACCCAAAATTTGAAGAAGTGGGAATTAAGC  
CCCATTACCTTATTGGTGCTGGACATAACAGTGAAACAAAACCCATGACTCAGAATGAGCA  
AAGAGAGGTTATTGATAAATCCGAGGTGGAAATGTAAATCTACTTATTGCTACAACCTGTAG  
CTGAGGAGGGCCTAGACATCAAAGAGTGTAACATCGTTATTTCGCTACGGCCTCGTCACCAA  
TGAAATTGCTATGATGCAGGCTCGTGGTCGAGCTCGAGCTGATGAGAGTACCTATGCACTT  
GTGGCTTCAAGTGGCTCACGAGCTATTGAACGTGAAGATGTTAATATTTTCCGTGAGCAAA  
TGATGTATAAAGCCATTCAGCGCATCCAGAAGATGCCTCAGGAAGAGTATTTAAATAAGATT  
CAGGATTTCCAGTTGCAAAGTATAGTGGAAAAAAAATGAAGGCAAAAAGAGATCAGCACA  
AGACATACAAGAAAAACCCCTTCACTAATAACATTCTTTGCAAAAATTGCCACAAGCTGATA  
TGTTCTGGAGAAGACATACAAGTTATTGAAAATATGCATCATGTCAGTGTGAAAAAAGATTT  
CCAAAGTCTTTACCATACAAGAGAAAAATAAGACACTGCAAGATAAGGATGCTGATTACCTGA  
CAAATGGGGAAATTATATGCAGAGATTGTGGACAAGCTTGGGGAAATTTGATGGTTCACCG  
AGGTCTTGACCTGCCTTGTCTAAAGATCAAAAATTTTGTAGTTGTGTTTGAAGACAAGAAAA  
CAACAAAGCATATTTTTAAGAAATGGCGAGAACTTCCCATCACATTCTGAGTTTTGATTAT  
GCAGCTCATTGTCCTTCAGAATATGAAGAC

>lichenostomus\_cassidix-passeriformes-mda5

ATGGCGGAGGGCAGCCGGGACGAGCGGTTCTCTACATGATCTCCTGCTTCAGGCCGCG  
GCTGAAGCAGTTCATCCAGGTGCAGCCCGTGCTGGACCGGCTGCCGTGCTGAGCGCGG  
AGGACAGGGAGCGGGTGCGGGCGGCCGCCCTGCAGCGGGGCGAGGTGGCGGCGGCGG  
AGGAGCTGCTGCGGGCCGTGGAGCGCGGGCCCCGCGGCTGCGGCTGGATCGGCGAGTT  
CCTGCAGGCGCTGGAGCACGGCGGCTGCAGCCTGGCCCTCTGCTACGCCAACCCAGCC  
TGAGCCAGCTGCCCTCGCCGGCAGAGGAGAACGAGCACGACCAGTGCCTGCACCTGGTG  
CAGCTGCTGCACGGCACTCTGGTGGACAGAATGCGGGCCGCGCAGGTGGCCGAGAAGTG  
CCTGGAGATGGGCATCTGCCAGGACGAGGACGTGGATCGGATCCAGGCTGTTACTGACA

CTCGTGGGAACAGAGAGGGTGAAGGGAGCTACTGAGCAGAATAGTGCAAAAGAAAGACT  
GGTTCTCTTCTTTTTTGTGGCTCTCCGTGAAACCCAACATGAAGACCTTGCAGATGAATTA  
AGTGGAAATACAGGAGGAACAGAGAATAAACAAAATGGGATGGAGAACAGTACAAATGAA  
GAAACAGAAGTTACAAGCCAACCAGGATATGTCATAGCGGAGAATTTGAAACTGGAAGAAA  
ATGTGGATGATAGTTTCTGCAGTGAGAGCAGTATATTGAAACATCCATAGAAAAGAATTCT  
GTGGTGTGAGAGTCAGATGTCTCTATTGGGGATGGAAGTGTGAGTAAGTCTGAATGAAAACC  
TGGGACAGAGCTGCACAACCAGTGATTCAGATGACATGGAG-----  
AGGAGAGCTTCACCTGAGCCAGATCTGACTCTGAGAGATTACCAGATGGAAGTTGCCAAG  
CCAGCACTGAATGGGGAGAATATTATAATTTGTCTCCCTACAGGCAGTGGTAAAACCAGAG  
TGGCTGTTTACATTACCAAAGATCACTTGGATAAGAAGAAAATAGCATCAGAGCCTGGAAA  
AGTCATGGTACTTGTTAATAAGGTGCCATTGGTAGAACAGCATTTACATGGAGAGTTTAATC  
CATTCCTGAAGCGTTGGTATCGGGTTACTGGTTTAAGTGGTGAATTCAGCTAAAAATCTCA  
TTTCCTGAAGTTGTCAGAAGAAATGATGTCATCATTAGTACAGCACAAATCCTTGAGAATTC  
ACTGTCAAATGCAGCCAAGGAAGATGAAGAAAGTGTCCACTTATCAGATTTTTCCCTCATCA  
TTATCGATGAGTGTGTCATCACACTCAAAAGGAAGGTGTCTACAACAATATAATGCGACGTTAC  
TTAAAGGAAAAGATGAAGAACATGAAGCTGGCAAAAGAAAACAAACCACTGATCCCACAGC  
CTCAGATTCTGGGACTTACAGCCTCACCTGGTGTAGGAGATGCAACATCCTACTCAAAAGC  
TGAAGAGCATATTCTGAAAATCTGTGCCAATCTTGATGCATGTAGAATTATGACTGTTGAAG  
AGCATGCCTCCCAGCTAAAGAATCAGGTGAAGGAACCATCTAAGAAGACTGTGATTGCAGA  
TGACAAAAAAAGGGATCCATTTAGAGAGAGAATTAGTGAGATCATGACAGAAATACAAAAC  
ATTGCCAGCTGCATCCAAAATCTGAGTTTGGAAGTCAAGACATATGAACAGTGGGTGATCAG  
AGAAGAGAAAAGAGCTGCAAAAGAAAGAAAACGCAAGGAACGTGTTTGTGCAGAGCACTT  
GAAGAAATACAATGATGCTCTCCAGATAAATGACACTATACGAATGGTGGATGCCTACAAT  
CACCTAAATAACTTTTATAAAGAGGAGAAAAGTAAAAAGACAGTAAGGAGTGATGATGATGA  
AGAACCAGCAGTATCAAAACAGGATGAAACAGATGAATTTCTAATAGGTTTATTTTCATGCAA  
AAAAGAAACAGCTGAAAGAGTTGACTGGAAAGCCAGAATATGAAAATGAGAAGCTAATGAA  
GTTGCGAAATACTTTAATGGAGGAGTTCACGAAGACTGAGGAACCTCGAGGAATTATTTTC  
ACAAAGACTCGTCTAAGTGCCTTTGCTCTAGTCCAGTGGATTAAGGACAACCCAAAATTTG  
AAGAAGTGGGAATTAAGGCCCATATCTTATTGGCTCTGGAAATAGCAGTGAAGTGAAGCC  
CATGACTCAGAATGAGCAAAGGGAAGTTATTGATAAATTTGGAAGAGGAAATGTAAATTTAC  
TTATTGCTACTACTGTAGCTGAGGAAGGCCTGGACATCAAAGAGTGTAACATCGTTATTGCG  
CTATGGCCTCGTCACCAATGAAATTGCTATGGTGCAGGCTCGTGGTCGAGCTCGAGCTGA  
TGAAAGCACCTATGCTCTTGTGGCTTCAGCTGGCTCAGGGGCTGTTGAACGTGAAGATGTT  
AATAATTTTCGTGAGAAAATGATGTATAAGGCCATTGAGCGTGTCCAGGAGATGCCACAGG  
AAGAGTATTTAAATAAGATTCAGAGTTTCCAGTTGCAAAGTATAGTGGAAAAAAAATGAAG  
GCAAACAGAGATCAGCACAAAGACATACAAGAAAAATCCTTCACTTATAAAATTCTTATGCAA  
AAATTGCTCCAAGCTGATATGTTCTGGAGAAGACATACAAGTTATTGAAGGCATGCATCATG  
TCAGTGTGAAAAAAGATTTCCAAAGTCTTTATCATACAAGAGAAAATAAGACACTGCAAGAT  
AAGCATGCTGATTACCAGACAAATGGGGAAATTATATGTAAAGATTGTGGACAAGTTTGGG  
GAAATATGATGGTTCACCGAGGTCTTGACCTGCCTTGTCTAAAGATAAGAAATTTTGTAGTT  
GTGTTTACAGACAAGAAAACAACAAAGGAAATTTTTAAGAAATGGGGAGATCTGCCCATCA  
GGTTTCCTAGTTTGGATTATGCAGCTTATTGTCCTTCAAGTGATGAAGAT  
>malurus\_cyaneus\_samueli-passeriformes-mda5  
ATGGCAGCGGGCACCCGGGACGAGCGGTTCTCTACATGATCTCCTGCTTCAGGCCGCG

GCTGAAGCAGTTCATCCGGGTGCAGCCCGTGCTGGACCGGCTCCCCTCGCTGAGCGCGG  
AGGACCGGGAGCGGGTGCGGGCGGGCCGCCCTGCAGCGGGGCGAGCTGGCGGGGGCGG  
AGGAGCTGCTGCGGGCCGTGGAGCGGGGGCCCCGCGGCTGCGGCTGGATCCGCGAGTT  
CCTGCAGGCGCTGGAGCACAGCGGCTGCGACCTGGCCGCCTCCTACGCCAACCCAGCC  
TGAGCCTGCTGCCCTCGCCGGCAGAGGAGGCCGAGCACGACCTGTGCGTGACCTGGTG  
CAGCTGCTGCACGTCACTCTGGTGGACAGAATGCGGACCGCGCAGGTGGCCCAGAAGTG  
CCTGGAGATGGGCATCTTCCAGGACGAGGACATGGATCGGATCCAGACTGTTACTGACAA  
TCGTGGGAACAGAGATGGTGCAAGGGAGCTACTGAGCAGAATAGTGAGAAGAAGGATTG  
GTTCTCTACTTTTTTATTGCTCTCCGTGAAACCCAGCATGAAGACCTTGACAGATGATTTAA  
GGGGAAATACAGGAGGAACAGAGAATAAACAAAGTGGGATGGAGAACAGTACAAATGAAG  
AAGCAGAAGTTACAAGCCAACCAGGATATGTTGTAGCAGAGAGCTTGAAAGAGGAAGAAAA  
TGTGGATGATAGTTCCAGCAGTGACAGCAGTGTACTGGAAACATCCACAGAAAAGAATTC  
ATGGTGTGAGAGTCAGATGTCTCCATAGGAGATGGAAGTGTGAGTAAGTGAACGAAACCC  
TGGGACAGAGCTGCACAACCAAGTATTGATGAAGCAGAG-----  
AGGAGAGCTTCACCCGAGCCAGATCTGACCCTGAGAGATTACCAGATGGAAGTTGCAAAG  
CCAGCACTGAATGGGGAGAATATTATAATTTGTCTCCCTACAGGCAGTGGTAAAACCAGAG  
TGGCTGTTTACATTACCAAAGATCACTTGGATAAGAAGAAAAGAGCATCAGAGCCTGGAAA  
AGTCATAGTACTTGTAAATAAGGTGCCATTGGTAGAACAGCATTTACAAAGAGAGTTTAATC  
CATTCCTGAAGCGTTGGTATCAGGTTACTGGTTAAGTGGTGAATCTCAGCTGAAAATCTCA  
TTTCCTGAAGTTGTCAAAAAGAAATGATGTTATCATCAGTACAGCACAGATCCTTGAGAATTC  
ACTGTTAAATGCAGCCAAGGAAGATGAAGAAGGTGTCCACTTATCAGATTTTTCCCTAATCA  
TTATCGATGAGTGTATCACACACAAAAGGAAGGTGTCTACAACAATATAATGCGACGTTAC  
TTAAAAGAAAAGAGGAAGAACAGGAAGCTGGCAAAAAGAAAACAAACCACTGATCCCACAGC  
CTCAGATTCTGGGACTTACAGCCTCACCTGGTGTAGGAGGTGCAACATCCTATTCAAAGC  
TGAAGAGCATATTCTCAAATCTGTGCCAATCTTGATGCATGTAGAATTATGACTGTTGAAG  
AGCATGCCTCTCAGCTAAAGAATCAGGTGAAGGAGCCATCTAAGAAGACTGTGATTGCAGA  
TGACAAAAAAGGGATCCATTTAGAGAGAGAATTATTGAGATCATGACAGAAATACAAAAT  
ATTGCCAGCTGCATCCAAAATCTGAGTTTGGAAGTCAAGACATATGAACAGTGGGTGATCAG  
AGAAGAGAGAAGAGCTGCAAAAAGAAAAACGCAAGGAGCGTGTTTGTGCAGAACATTT  
GAAGAAATACAATGATGCTCTCCAGATAAATGACACTATACGAATGGTGGATGCCTACAAT  
CACCTAAATACTTCTATAAAGAGGAGAAAAGTAAGAAGACAGTAAGGAGTGATGATGATG  
ATGAACCTCCAGTATCAAACAGGATGAAACAGATGAATTTCTAATAGGTTTATTTATGCA  
AAAAAGAAACAGTTGAAAGAGTTGACTGGAAAGCCAGAAAATGAAAATGAGAAGCTAATAA  
AGTTGCGAAATACTTTAATGGAGGAGTTCACGAAGACTGAGGAGGCTCGAGGAATTATTTT  
CACAAAGACTCGTCTAAGTGCCCTTGTCTATGCCAGTGGGTTAAGGACAACCCTAAATTT  
GAAGAAGTGGGAATTAAGGCCATTACCTTATTGGCTGTGGACATAACAGTGAAATGAAGC  
CCATGACTCAGAATGAGCAAAGGGAAGTTATTGATAAATTCGACGAGGAAATATAAATTTA  
CTTATTGCTACTACTGTAGCTGAGGAAGGCCTGGACATCAAAGAGTGTAACATCGTTATTC  
GTTATGGACTCGTCACCAATGAAATTGCTATGGTGCAGGCTCGTGGTCGAGCTCGAGCTG  
ATGAAAGCACATATGCTCTTGTGGCTTCGAGTGGCTCAGGGGCTGTTGAACGTGAAGATGT  
TAATAATTTTCGTGAGAAAATGATGTATAAGGCCATTGAGCGTGTCCAGAAGATGCCACAG  
GAAGAGTATTTAAATAAGATTGAGAGTTTCCAGTTGCAAAGTATAGTGGAAGAAACAAATGAA  
GGCAAAGAGAGATCAGCATAAGACATAAAGGAAAATCCTTCACTAATAAAATTCTTGTGCA  
AAAATTGCTACAAGCCAATATGTTCTGGAGAAGATATACAGGTTATTGAAGAAATGCATCAT

GTCAGTGTGAAAAAGATTTCCAAGATCTTTACCATACAAGAGAAAATAAGACACTGCAAGA  
TAAGCATGCTGATTACCAGACAAATGGGGAAATTATTTGTAAAGATTGTGGACAAGCTTGG  
GGAAATATGATGGTTCACCGAGGTCTTGACCTGCCTTGTCTAAAGATTAGAAATTTTGTGGT  
TGTGTTTGCAGACAAGAAAACAACAAAGAAAATTTTTAAGAAATGGGGAGAACTGCCCATC  
AGGTTTCCTAGTTTTGATTATGCAGCTCATTGGCCTTCAAGTGATGAAGAT

>alauda\_arvensis-passeriformes-md5

ATGGCAGAGGGCACCCGGGACGAGCGGTTCTGTACATAATCTCCTGCTTCAGGCCGCG  
GCTGCGGCAGTACATCCAGGTGCAGCCCGTGCTGGACGGGCTCCCCTCGCTGAGCGCGG  
AGGACAGGGACAGGGTGCGTACGGCCGCCCTGCAGCGCGGCGAGGTGGCGGGCGCCGA  
GGAGCTGCTGAGGGCCGTGGAGCGAGGGCCCCGCGGCTGCGGCTGGATCCGCGAGTTC  
CTGCAGGCGCTGGAGAGCGGGGGCTGCAGCCTGGCCGCCTGCTAYGCCAACCCAGCCT  
GAGCCAGCTGCCCTCGCCGGCAGAGGAGAGCGAGCACGACCTGTGCGTGCACCTGGTGC  
AGCTGCTGCACGGCACSTGTTGGACAGGATGCGCGCCGTGCCGGTGGCCGAGAAGTGC  
CTGGAGATGGGAATCTTCTTGGACGAGGACGTGGATCGGATCCAGACTGTTACTGACAAT  
CGTGGGAACAGAGATGGTGCAAGGGAGCTACTGAGCAGAATAGTCCAGAAGAAAGATTGG  
TTCTCTTCTTTTTTATTGCTCTCCGTGAAACCCAACATGAAGACCTTGCAAATGATTTAAGT  
GGAAATACAGGA-----

GAGAATAAACAAAATGGGATGGAGCAGACCACAAATGAAGAGACAGAAGTTAGAAGCCAA  
CCTGGATACCTCACAGAGGAGAATGTGAAACAGGAAGAAAATGTGGATGCTAGTTTCAGCA  
GTGAGAACAATGTGTTGGAAACATCCATTGAAAAGAATTCTGTGGTGTGAGAGTCAGATGT  
CTCCATAGGAGATGGGAATGTCAGTAACCTTGTATGAAGACCTGGGACAGARCTGCACAAC  
CAGTGATTCAGATGAAGTGGAG-----

AGGAGAGCCTCACCTCAGCCAGATCTGATCCTGAGGGACTACCAGATGGAAGTTGCAAAG  
CCAGCACTGAATGGGGAGAATATTATAATCTGTCTCCCTACGGGCAGTGGTAAACCAGAG  
TGGCTGTTTACATTACCAAAGATCACTTGGATAAGAAGAAAAGAGCATCAGASCCTGGAAA  
AGTCATAGTACTTGTAAATAAGGTTCCATTGGTAGAACAGCATTTACAAACAGAATTTAGTC  
CATTCCTGAAGCGTTGGTATCAGGTTACTGGTTTAAGTGGTGAATGTCAGCTGAAAATCTCA  
TTTCCTGAAGTTGTCAAAAGAAATGATGTCATCATCTGTACAGCACAGATCCTTGAGAATTC  
ACTGTTAAATGCATCCAAGGAAGACGAAGAAGGTGTCCACTTATCAGATTTTTCCCTCATCA  
TTATTGATGAGTGTGTCATCACTCAAAAGGAAGGTGTCTACAACAATATAATGCGGCGCTA  
CTTAGAAGAAAAGATGAAGAACAGGAAGCTGGCAAAAGAAAACAAACCACTGATCCACAG  
CCTCAGATTCTGGGACTTACAGCCTCACCTGGTGTAGGAGGTGCAACATCCTACGCAAAA  
GCTGAAGAGCATATTCTGAAAATCTGTGCCAATCTCGATGCATGTAGAATTATGACTGTAGA  
AGAGCATGCCTCCAGCTAAAGAAKCAGGTGAAGGAACCAGCTAAGAAGACAGTGATTGC  
AGATGACAAAAGAAGGGATCCATTTAAAGAGAAAATTACTGAGATCATGACAGAAATACAAA  
ACTATTGCCAGCTGCATCCCAAGTCTGAGTTTGGAAGTCAAGACATATGAACAGTGGGTGAT  
CAGAGAAGAGAGAAGAGCTGCAAAAGAAAGAAAACGCAGGGAACGTGTCTGTGCAGAACA  
CTTGAAGAAATACAATGATGCTCTCCAGATAAATGACACCATCCGAATGGTGGATGCCTAC  
AATCACCTAAATAACTTCTATAAAGAGGAGAAAAGTAAGAAGACAGTCAGCAGTGATGATG  
ATGATGAAGCAGCAGTATCTAAACAGGATGAAACAGATGAATTTCTAATAGGTTTATTTAT  
GCAAAAAAGAAACAGCTGGAAGAGTTGACTGGAAAGCCAGAAAATGAAAATGAGAAGCTAA  
TAAAGTTGAGAAATACTTTAATGGAGGAGTTCACAAAGATTGAGGAACCTCGAGGAATCATT  
TTCACAAAGACTCGTCTGAGTGCCTTTGCTCTATTCCAGTGGATTAAGGACAACCCAAAATT  
TGAAGAAGTGGGAATTAGGGCCCATTATCTTATTGGCTCTGGACATAAGAGCGAAGTGAAG

CCCATGACTCAGAATGARCAAAGGGAAGTTATTGATAAATTTTCGACGTGGAATGTAAATTT  
ACTGATTGCTACTACTGTAGCWGAGGAAGGCCTGGACATCAAAGAGTGTAACATTGTTATT  
CGCTATGGCCTCGTCACCAATGAAATTGCTATGGTGCAGGCTCGTGGTAGAGCTCGAGCT  
GATGAAAGCACCTATGCTCTTGTGGCTTCAAGTGGCTCAGGGGCTGTTGAACGTGAAGAT  
GTTAATATGTTTCGTGAGAAAATGATGTACAAGGCCATTGAGCGTGTCCAGAAGATGCCAC  
AGGAAGAGTATTTAAATAAGATTGAGAGTTTCCAGTTGCAAAGTATAGTGGAAAAACGAATG  
AAGGCAAAGAGAGATCAGCTCAAGACATACAAGAAAAATCCTTCCCTAATAAAATTCTTATG  
CAAAAATTGCTACAAGTCAATATGTTCTGGAGAAGACATACAAGTTATTGAAGACATGCATC  
ATGTCAGTGTGAAAAAAGATTTCCAGAGTCAATATCATACAAGAGAAAAATAAAACACTGCAG  
GATAAGCATGCTGATTACCAGATAAATGGGGAAATCATATGCAAAGACTGTGGACAAGCTT  
GGGGAAATATGATGGTTCACCGAGGTCTTGACCTGCCTTGTCTAAAGATTAGAAATTTTGT  
GGTTGTGTTTGAAGACAAGAAAACAACAAAGCAAATTTTAAAGAAATGGGGAGATCTGCCC  
ATCAGGTTTCCTAGTTTGGATTATGCAGCTTATTGTCCTTCAAGTGATGAAGAT

>eremophila\_alpestris-passeriformes-md5

ATGGCAGAGGGCACCCGGGACGAGCGGTTCTGTACACAATCTCCTGCTTCAGGCCGCG  
GCTGCGGCAGTACATCCAGGTGCAGCCCGTGTGACGGGCTCCCTCGCTGAGCGCGG  
AGGACAGGGACAGGGTGCCTACGGCCGCCCTGCAGCGCGGCCAGGTGGCGGGCGCGGA  
GGAGCTGCTGCGGGCCGTGGAGCGAGGGCCCCGCGGCTGCGGCTGGATCCGCGAGTTC  
CTGCAGGCGCTGGAGCGCGGGGGCTGCAGCCTGGCCGCTGCTACGCCAACCCAGCC  
TGAGCCAGCTGCCCTCGCCGGCAGAGGAGAGCGAGCACGACCTGTGCGTGCACCTGGTG  
CAGCTGCTGCACGGCACCCCTGGTGGACAGGATGCGCGCCGTGCCGGTGGCCGAGAAGT  
GCCTGGAGATGGGAATCTTCCAGGACGACGACATGGATCGGATCCAGACTGTTACTGACA  
ATCGTGGGAACAGAGATGGTGCAAGGGAGCTACTGAGCAGAATAGTCCAGAAGAAAGATT  
GGTTCTCTTCTTTTTTGTGTTGCTCTCCGTGAAACCCAGCATGAAGACCTTGCAAATGATTTA  
AGTGGAATACAGGA-----

GAGAATAAACAAAATGGGATGGAGCAAACCACAAATGAAGAGACAGAAGTCGGAAGCCAA  
CCTGGATACCTCATAGAGGAGAATTTGAAACAGGAAGAAAATGTGGATGATAGTTTCAGCA  
GTGAGAACAGTGTGTTGGAAACATCCATTGAAAAGAATTCTGTGGTGTGAGAGTCAGATGT  
CTCCATAGGAGATGGGAATGTCAGTAACCTGTATGAAGACCTGGGACAGAGCTGCACAAC  
CAGTGATTCAGATGAAGTGGAG-----

AGGAGAGCCTCACCTCAGCCAGATCTGACCCTGAGAGATTACCAGATGGAAGTTGCAAAG  
CCAGCACTGAATGGGGAGAATATTATAATATGTCTCCCTACAGGCAGTGGTAAAACCAGAG  
TGGCTGTTTACATTACCAAAGATCACTTGGATAAGAAGAAAAGAGCATCAGAGCCTGGAAA  
AGTCATAGTACTTGTTAATAAGGTTCCATTGGTAGAACAGCATTTACAAACAGAATTTAGTC  
CATTTCTGAAGCGTTGGTATCAGGTTACTGGTTTAAAGTGGTGTGATTGTCAGCTGAAAATCTCA  
TTTCCTGAAGTTGTCAAAAAGAAATGATGTCATCATCTGTACAGCACAGATCCTTGAGAATTC  
ACTGTTAAATGCATCCACGGAAGATGAAGAAGGTGTCCACTTATCAGATTTTCCCTCATCA  
TTATTGATGAGTGTATCACACTCAAAGGAAGGTGTCTACAACAATATAATGCGGCGCTA  
CTTGAAAGAAAAGATGAAGAACAGGAAGCTGGCAAAAGAAAACAAACCCCTGATCCACAG  
CCTCAGATTCTGGGACTCACAGCCTCACCTGGTGTAGGAGGTGCAACATCCTACTCAAAG  
CTGAAGAACATATTCTGAAAATCTGTGCCAATCTCGATGCATGTAGAATTATGACTGTAGAA  
GAGCATGCCTCCCAGCTAAAGAATCAGGTGAAGGAACCAGCTAAGAAGACAGTGATTGCA  
GATGACAAAAAAGGGATCCATTTAAAGAGAAAATTACTGAGATCATGACAGAAATACAAAA  
CTACTGCCAGCTGTATCCCAAGTCTGAGTTTGGAACCTCAGACATATGAACAGTGGGTGATC

AGAGAAGAGAGAAGAGCTGCAAAAGAAGAAAAACGCAGGGAACGTGTCTGTGCAGAACAC  
TTGAAGAAATACAATGATGCTCTCCAGATAAATGACACCATCCGAATGGTGGATGCCTACA  
ATCACCTAAATAACTTCTATGAAGAGGAGAAAAGTAAGAAGACAGTCAGGAGTGATGATGA  
TGATGAACCAGCAGTATCTAAACAGGATGAAACAGATGAATTTCTAATAGGTTTATTTTCATG  
CAAAGAAGAAACAGCTGGAAGAGTTGACTGGAAAGCCAGAAAATGAAAATGAGAAGCTAAC  
AAAGTTGAGAAATACTTTAATGGAGGAGTTCACAAAGATTGAGGAACCTCGAGGAATCATT  
TCACAAAGACTCGTCTGAGTGCCTTTGCTCTATTCCAATGGATTAAGGACAACCCAAAATTT  
GCAGAAGTGGAATTAGGGCCCATTATCTTATTGGGTCTGGACATAAGAGTGAAACGAAGC  
CCATGACTCAGAATGAGCAAAGGGAAGTTATTGATAAATTCGACGTGGAAATCTAAATTTA  
CTGATTGCTACTACTGTAGCTGAGGAAGGCCTGGACATCAAAGAGTGTAACATTGTTATTC  
GCTATGGCCTCGTCACCAATGAAATTGCTATGGTGCAGGCTCGTGGTAGAGCTCGAGCTG  
ATGAAAGCACCTATACTCTTGTGGTTTCGAGTGGCTCAGGGGCTGTTGAACGTGAAGATGT  
TAATATGTTTCGTGAGAAAATGATGTATAAGGCCATTGAGCGTGTCCAGAAGATGCCACAG  
GAAGAGTATTTAGATAAGATTGAGAGTTTCCAGTTGCAAAGTATAGTGGAAGAACGAATGAA  
GGCAAAGAGAGATCAGCTCAAGACATATAAGAAAAATCCTTCCTTAATAAAATTCTTATGCA  
AAAATTGCTACAAGTCAATATGTTCTGGAGAAGACATACAAGTTATTGAAGACATGCATCAT  
GTCTGTGTGAAAAAAGATTTCCAAAGTCATTATCATACAAGAGAAAATAAAACACTGCAGGA  
TAAGCATGCTGATTACCAGACAAATGGGGAAATCATATGCAAAGACTGTGGACAAGCTTGG  
GGAAATATGATGGTTCACCGAGGTCTTGACCTGCCTTGTCTAAAGATTAGAAATTTTGTGGT  
TGTGTTTGCAGACAAGAAAAACAACAAAGCAAGTTTTTAAGAAATGGGGAGATCTGCCCATC  
AGGTTTCCTAGTTTGGATTATGCAGCTCATTGTCCTTCAAGTGATGAAGAT

>hirundo\_rustica-passeriformes-mda5

ATGGCAGAGGGGCACCCGCGACGAGCGGTTCTCTACATGCTCTCCTGCTTCAGGCCGCG  
GCTGAAGCAGTTCATCCAGGCGCAGCCCGTGCTGGACCGGCTCCCGTCGCTGAGCGCGG  
AGGACAGGGACAGGGTGCGTGCGGCCGTCGCGCAGCGCGGCGCGGCGGGCGCGCGG  
AGGAGCTGCTGCGGGCCGTTGGAGCGGGGGCCCCGCGGCGGCGGCTGGATCCGCGAGTT  
CCTGCAGGCGCTGGAGCACGGTGGCTGCGCCCTGGCCGCTGCTACGCCAACCCAGCC  
TGAGCCAGCTGCCCTCGCCGCGCAGGAGGCGGAGCACGACCACTGCGTGCGCCTGGT  
GCAGCTGCTGCACGGCACGCTGGTGGACAGGATGCGCACCGTCCCCGTGGCCGAGAAGT  
GCCTGGAGATGGGAATCTTCCAGGACGAGGACGTGGATCGGATCCAGGCTGTTACTGACA  
ATCATGGGAACAGAGATGGTGCAAGGGAGCTACTGAGCAGAATAGTCCAGAAGAAAGACT  
GGTTCTCGTCTTTTTTAGTTGCTCTCCGTGAGACCCAACATGAAGACCTTGCAGATGATTTA  
AGTGGAATACAGGA-----

GAGAATAAAGAAAATGGGATGGAGCAGACTACAAACAAAGAGACAGAAGTTGCATGCCAA  
CCTGGATACGTCATAGAGGAGAATTTGAAACGGGAAGAAAATGTGGATGATAGTTTCAGCA  
GTGAGAACAATGTGTTGGAAACATCCATAGAAAAGAATTCTGTGGTGTGAGAGTCAGATGT  
CTCCATAGGAGATGGAAGTGTGAGTAACCTGAACGAAAACCTGGGAGAGAGCTGCACAAC  
CAGTGATTCAGATGAAGTGGAG-----

AGGAGAGCCTCACCTCAGCCAGACCTGACCCTGAGAGATTACCAGATGGAAGTTGCAAAG  
CCAGCACTGAACGGGGGAAAATATTATAATATGTCTCCCTACGGGCAGTGGTAAACAGAG  
TGGCTGTTTACATTACCAAAGATCACTTGGATAAGAAGAAAAGAGCATCAGAGCCTGGAAG  
AGTCATAGTACTTGTTAATAAGGTTCCATTGGTAGAACAGCATTTACAAACAGAGTTTGGTC  
CATTCTGAAGCGTTGGTATCAGGTTATTGGTTTAAGTGGTGAAGTCTCAGCTGAAAATCTCA  
TTTCTGAAGTTGTCAGAAGAAATGATGTCATCATCAGTACAGCACAGATCCTTGAGAATTC

ACTGTTAAATGCATCCAAAGAAGATGAAGAAAGTGTCCATTTATCAGATTTTTCCCTCATCA  
TTATCGATGAGTGTGCATCACACTCAAAGGAAGGTGTCTACAACAATATAATGCGACGTTAC  
TTAAAAGAAAAGATGAAGAACAGGAGGCTGGCAAAAGAAAATAAACCACTGATCCCACAAC  
CTCAGATTCTGGGTCTTACAGCCTCACCTGGTGTAGGAAGTGCAACATCCTACTCGAAAGC  
AGAAGAGCATATTTTGAAAATCTGTGCCAATCTCGATGCATGTAGAATTATGACTGTTGAAG  
AGCATGCCTCCCAGCTAAAGAATCAGGTGAAGGAACCGTCTAAGAAGACTGTGATTGCAG  
ATGACAAAAAAGGGATCCATTTAAAGAGAGAATTACTGAGATCATGACAGAAATACAAAAC  
TATTGCCAGCTGCATCCCAAGTCTGAGTTTGGAACCTCAGACATATGAACAGTGGGTGATCA  
GAGAAGAAAGAAGAGCTGCAAAAGAAGAAAAACGCGAGGGAACGTGTCTGTGCAGAACT  
TGAAGAAATACAACGATGCTCTCCAGATAAATGACACCATCCGAATGGTGGATGCCTACAA  
TCACCTAATGAACTTTTATAAAGAGGAGAAAAAGTAAGAAGACAGTAAGGAGTGAGGATGAT  
GGTCAACCAGTAGTATCTAAACAGGATGAAACAGATGAATTTCTAATAGGTTTATTTTCATGC  
AAAAAAGAAACAGCTGGAAGAGTTGACTAGAAAGCCAGAAAATGAAAATGAGAAGCTAATA  
AAGTTGAGAAATACTTTAATGGAGGAGTTCACAAAGACTGAGGAACCTCGAGGAATCATTT  
TCACAAAGACACGTCTAAGTGCCTTTGCTCTATTCCAGTGGATAAAGGACAACCCAAAATTT  
GAAGAAGTGGGAATTAGGGCCCATTATCTTATTGGCTCTGGACATAAAAGTGAAATGAAGC  
CCATGACTCAGAATGAGCAAAGGGAAGTTATTGATAAATTTGACAGGGAAATGTAAATTTA  
CTAATTGCTACTACTGTAGCTGAGGAAGGCCTGGACATCAAAGAGTGTAACATCGTTATTC  
GCTATGGCCTCGTCACCAATGAAATTGCAATGGTGCAGGCTCGTGGTAGAGCTCGAGCTG  
ATGAAAGCACCTATGCTCTTGTGGCTTCGGGTGGCTCAGGGGCTGTGGAACGGGAAGATG  
TTAATATTTTTCTGTGAGAAAATGATGTATAAGGCCATACAGCGTGTCCAGAAGATGCCACAG  
GAAGAGTATTTAAAGAAGATTGAGAGTTTCCAGTTGCAAAGTATAGTGGAACAAATGAA  
GACAAAGAGAGAACAGCTCAAGACATACAAGAAAAATCCTTCACTAATAAAATTCTTATGCA  
AAAATTGCTCCAAGCTGATATGTTCCGGAGAAGACATACAAGTTATTGAAAACATGCATCAT  
GTCAGTGTGAAAAAAGATTTCCAAAGTCATTATCATACAAGAGAAAATAAAACACTGCAGGA  
TAAGCATGCCGATTACCAGACAAATGGGGAAATTATATGCAAAGACTGTGGACAAGCTTGG  
GGAAATATGATGGTTACCGAGGTCTTGACCTGCCTTGTCTAAAGATTAGAAATTTTGTGAT  
TGTGTTTGAAGACAAGAGAGCAACAAAGCAAATTTTTAAGAAATGGGGAGATCTGCCCATC  
AGGTTTCCTAGTTTTGATTATGCAGCTCATTGTCTTCAAGTGATGAAGAT

>sylvia\_atricapilla-passeriformes-mda5

ATGGAAGAGAGCACCCGGGACGAGCGGTTCTGTACATGATCTCCTGCTTCAGGCCGCG  
GCTGAAGCAGTTCATCCAGGTGCAGCCCGTGCTGGACCAGCTCCCGTCGCTGAGCGCGG  
AGGACAGGGACAGGGTGCGTGCGGCCGCCAGCAGCGGGGCGCGGCGGGCGGCCG  
AGGAGCTGCTGCGGGCCGTGGAGCGGGGGCCCCGCGGCTGCGGCTGGATCCGCGAGTT  
CCTGCAGGCGCTGGAGCGCGGGGGCTGCAGCCTGGCCGCCTGCTACGCCAACCCACGC  
CTGAGCCAGCTGCCCTCGCCGGCACAGGAGGCCGAGCACGACCTGTGCGCCCGCCTGGT  
GCAGCTGCTGCACGGCACGCTGGTGGACAGGATGCGCGCCGTGCCGGTGGCCGAGAAG  
TGCCTGGAGATGGGAATCTTCCAGGACGAGGACATGGATCGGATCCAGACTGTTTCTGAC  
AATCGTGGGAACAGAGATGGTGCAAGGGAGCTACTGAGCAGAATTGTCCAGAAGAAAGAT  
TGGTTCTCTTCTTTTTGGTTGCTCTCCGTGAAACCCAACATGAAGATCTTGCAGATGATTT  
AAGTGGAATACAGGA-----  
GAGAATAAACAAAATGGGATGGAGGAGAATACAAATGAAGAGACAGAAGTTACAAGCCAAC  
CTGGACACATCATAGAGGAGAATTTGAAGCAGGAAGAAAATGTGGATGATAGTTTCAGCAG  
TGGGAGCAGTGTGTTGGAACATCCACAGAAAAGAATTCTACGGTGTGAGAGTCAGATGTC



TCCATAGGAGATGGAAGTGTCACTTAAGTGAATGAAGACCTGGGACAGAGCTGCACAACCA  
GTGATTGAGATGAAGTGGAG-----  
AGGAGAGCCTCACCTCAGCCAGATCTGACCCTGAGAGATTACCAGATGGAAGTTGCAAAG  
CCAGCACTGAATGGGGAGAATATTATAATATGTCTCCCTACGGGCAGTGGTAAAACAGAG  
TGGCTGTTTACATTACCAAAGATCACTTGGAT---  
AAGAGAAGAGCATCAAAGCCTGGAAAAGTCATAGTACTTGTTAATAAGGTTCCATTGGTAG  
AACAGCATTACGAACAGAGTTTAGTCCATTCTGAAGCGTTGGTATCAGGTTATTGGTTTA  
AGTGGTGATTCTCAGCTGAAAATCTCATTTCCTGAAGTTGTCAGAAGAAATGATGTCATCAT  
CTGTACAGCACAGATCCTTGAGAATTCAGTGTAAATGCATCCAAGGAAGATGAAGAAGGC  
GTCCACTTATCAGATTTTTCCCTCATCATTATCGATGAGTGTATCACACTCAAAGGAAGG  
TGTCTACAACAACATAATGCGACGTTACTTAAAGAAAAGATTAAGAACAGGAGGCTGGCA  
AAAGAAAACAAACCACTGATCCCACAGCCTCAGATTCTGGGACTTACAGCCTCACCTGGTG  
TAGGAGGTGCAACAACCAACTCGAAAGCTGAAGAGCACATTTTGAAAATCTGTGCCAATCT  
CGATGCAAGTAGAATTATGACTGTTGAGGAGCATACTTCCCAGCTAAAGAATCAGGTGAAG  
GAACCATCTAAGAAGACTGTGATTGCAGATGACAAAAAGAGGGATCCATTTAAAGAGAGAA  
TTATTGAGGTCATGACAGAAATACAAAATCTTGGCAGCTGCATCCCAAATCTGAGTTTGGA  
ACTCAGACATATGAACAGTGGGTGATCAGAGAAGAGAGAAGAGCTGCAAAAGAAGAAAAG  
CGCAGGGAGCGTGTCTGTGCGGAACACTTGAAGAAATACAACGATGCTCTCCAGATCAAT  
GACACCATCCGAATGGTGGATGCCTACAACCACCTAAATACTTTTACGAAGAGGAGAAAA  
GTAAGAAGACAGTAAGGAGTGTGAGGATGATGAACCAGCAGTATCTAAACAGGATGAAA  
CAGATGAATTTCTAATAGGTTTATTTTATGCAAAAAAGAAACAGCTGGAAGAGTTGACTGGA  
AAGCCAGAAAATGAAAATGAGAAGCTAATAAGTTGAGAAATACTTTAATGGAGGAGTTTAC  
AAAGACTGAGGAACCTCGAGGAATCATTTTACAAAGACTCGTCTAAGTGCCTTTGCTCTAT  
TCCAGTGGATTAAGGACAACCCAAAATTTAAAGAAGTGGGAATTAGGGCCCATTTATCTTATT  
GGCTCTGGACATAAGAGTGAAATGAAGCCCATGACTCAGAATGAGCAAAGAGAAGTTATTG  
ATAAATTTTCGACGTGGAAATGTAAATTTACTAATTGCTACTACTGTAGCTGAGGAAGGGCTG  
GACATCAAAGAGTGTAACATCGTTATACGCTACGGCCTCGTCACCAATGAAATTGCTATGG  
TGCAGGCTCGTGGTAGAGCTCGAGCTGATGAAAGCACCTATGCTCTTGTTGGCTTCGATTG  
GCTCAGGGGCTGTTGAACGTGAAGATGTTAATATGTTTCGTGAGAAAATGATGTATAAGGC  
CATTGAGCGTGTCCAGAAGATGCCACAGGAAGAGTATTTAGAAAAGATTGAGAGTTTCCAG  
TTGCAAAGTGTAATGGAAAAACACATGAAGGCAAAGAGAGATCAGCTCAAGACATACAAGA  
AAAATCCTTCACTAATAAAATTCTTATGCAAAAATTGCTCCAAGCCGATATGTTCTGGAGAA  
GACATACAAGTTATTGAAAACATGCATCATGTGAGTGTGAAAAAAGATTTCCAAAGTCATTA  
TCATACAAGAGAAAATAAAACGCTGCAGGATAAGCAAGCTGATTACCAGACAAATGGAGAA  
ATTATATGCAAAGACTGCGGACAAGCTTGGGGAAATATGATGGTTACCCGAGGTCTTGACC  
TGCCTTGTCTAAAGATTAGAAATTTTGTTGTTGTGTTTGCAGACAAGAAAACAACAAAGCAA  
ATTTTAAAGAGATGGGGAGATCTTCCCATCAGGTTTCCTAGTTTTGATTATGCAGCTCATTG  
TCCTTCAAGCGATGAAGAT

>zosterops\_pallidus-passeriformes-mda5

ATGGCAGAGAGCAGCCGGGACGAGCGGTTTCCTGTACATGATCTCCTGCTTCAGGCCGCG  
GCTGAGGCGGTTTCATCCAGGTGCAGCCCGTGCTGGACCGGCTGCCGTCGCTGGGCGCG  
GAGGAGCGGGAGCGGGTGCGGGCGGCCGCGCAGCAGCGGGGAGAGGTGGCGGGCGCC  
GAGGAGCTGCTGCGGGCCGTGGAGCGGGGCCCCCGCGGCTGCGGCTGGATCCGCGAGT  
TCCTGCAGGCGCTGGAGCACGGGGGCTGCAGCCTGGCCGCTGCTACGCCAACCCAGC

ATGAGCCTGCTGCCCTCGCCGGCGCAGGAGGCCGAGCACGACCTGTGCGTGACCTGGT  
GCAGCTGCTGCACGGCACGCTGGTGGACAGGATGCGCGCCGTGCCCGTGGCCGAAAAGT  
GCCTGGAGATGGGAATCTTCCAGGACGAGGACATGGAGCGGATCCAGACTGTTACTGACA  
ATCGTGGAACAGAGATGGTGCAAGGGAGCTGCTGAGCAGAGTAGTCCAGAAGAAAGATT  
GGTTCTCGCCTTTTTTGGTTGCTCTCCGTGAAACCCAACATGAAGACCTTGCAGATGATTTA  
AGTGGTAATACAGGA-----  
GAGAATAAACAAAATGGGATGGAGCAGACTACAAATGAAGAGACAGAAGTTACAAGCCAAC  
CTGGACACGCCATAGAGGAGAATTCGAAACTGGAAGAAAATGTGGATGACAGTTTCAGCA  
GTGAGAACAGTGTGTTGGAAACATCTATAGAAAAGAATTCTATCGTGTGAGAGTCAGATGT  
CTCCATAGGAGATGGAAGTGTGAGTAACCTTGAATGAAGACCTGGGAGAGAGCTGCACAAC  
CAGTGATTCAGATGAAGTGGAG-----  
AGGAGAGCCTCACCTCAGCCAGATCTGACCCTGAGAGATTACCAGATGGAAGTTGCAAAG  
CCAGCACTGAGTGGGGAGAATATTATAATATGTCTCCCTACGGGCAGTGGTAAACCAGAG  
TGGCTGTTTACATTACCAAAGATCACTTGGATAAGAAGAGAAGAGCATCAGAGCCTGGAAA  
AGTCATAGTACTTGTTAATAAGGTTCCATTGGTAGAACAAACATTTACAAACAGAGTTTAGTC  
CATTCCTGAAGCGTTGGTATCAGGTTATTGGTTAAGTGGTGATTCTCAGCTGAAAATCTCA  
TTTCCTGAAGTTGTCAGAAGAAATGATGTCATCATCTGTACAGCACAGATCCTTGAGAATTC  
ACTGTTAAATGCATCCAAGGAAGATGAAGAAGGTGTCCACTTATCAGATTTTTCCCTCATCA  
TTATCGATGAGTGTGTCATCACTCAAAAGGAGGGTGTCTACAACAATATAATGCGACGTTA  
CTTAAAAGAAAAGATGAAGAACAGGAAGCTGGCAAAAGAAAACAAACCACTGATCCACAG  
CCTCAGATTCTGGGACTTACAGCCTCACCTGGTGTAGGAGGTGCAAAAACCTCCTCGAAA  
GCTGAAGAGCATATTTTGAAGATCTGTGCCAATCTCGATGCATGTAGAATTATGACTGTTGA  
AGAGCATTCTCCAGCTAAAGAATCAGGTGAAAGAACCGTCTAAGAAGACTGTGATTGCA  
GATGACAAAAAAGGGATCCATTTAAAGAGAAAATTATTGAGATCATGACAGAAATACAAAA  
CTATTGCCAGCTGCATCCCAAGTCTGAGTTTGGAACTCAGACATATGAGCAGTGGGTGATC  
AGAGAAGAGAGAAGAGCTGCAAAAGAAGAAAAGCGCAGGGAACGTGTCTGTGAGAACAC  
TTGAAGAAATACAATGATGCTCTCCAGATAAATGACACCATCCGAATGGTGGATGCCTACA  
ATCACCTAAATAGCTTTTATAAAGAGGAGAAAAGTAAGAAGACAGTAAGGAGTGATGATAAT  
GATGAACCAGCAGTATCTAAACAGGATGAAACAGATGAATTTCTAATAGGTTTATTTTCATGC  
GAAAAAGAAACAGCTGGAAGAGTTGACTGGAAAGCCAGAAAATGAAAATGAGAAGTTAATA  
AAGTTGAGAAATACTTTAATGGAGGAGTTCACAAAGACTGAGGAACCTCGAGGAATCATTT  
TCACAAAGACTCGTCTAAGTGCCTTTGCTCTATTCCAGTGGATTAAGGACAACCCAAAATTT  
GAAGAAGTGGGAATTAGGGCTCATTATCTTATTGGCTCTGGACATAAGAGTGAAATGAAGC  
CCATGACTCAGAATGAACAAAGGGAAGTCATTGATAAATTCGACGTGGAAATGTAAATTTA  
CTAATTGCTACTACTGTAGCTGAGGAAGGCCTGGACATCAAGGAATGTAAACATCGTAATTC  
GCTATGGCCTCGTCACCAATGAAATTGCTATGGTGCAGGCTCGTGGTAGAGCTCGAGCTG  
ATGAAAGCACCTATGCTCTTGCTTCAACTGGCTCAGGGGCTGTTGAACGTGAAGATGT  
TAATATGTTTCGTGAGAAAATGATGTATAAGGCCATTGAGCGTGTCCAGAAGATGCCACAG  
GAAGAGTATTTAAATAAGATTGAGAGTTTCCAGTACCAAAGTATAGTGGAACAAATGAA  
GGCAAAGAAGGATCAGCTCAAGACATACAAGAAAAATCCTTCACTAATAAAATTCTTATGCA  
AAAATTGCTCCAAGCCGATATGTTCCGGAGAAGACATACAAGTTATTGAAAACATGCATCAT  
GTCAGTGTGAAAAAAGATTTCAAAGTCATTATCATACAAGAGAAAACAAACACTACAGGA  
TAAGCAAGCTGATTACCAGACAAATGGGGAAATTATATGCAAAGACTGTGGACAAGCTTGG  
GGAAATATGATGGTTCACCGAAGTCTTGACCTGCCTTGTCTAAAGATTAGAAATTTTGTAGT

TGTGTTTTGCAGACAAGAAAACAACAAAGCAAATTTTTAAGAGATGGGGAGACCTGCCCATC  
AGCTTTCCTACTTTTGATTATGCAGCTCATTGTCCTTCAAGTGATGAAGAT

>cyanoderma\_ruficeps-passeriformes-mda5

ATGGCAGAGAGCACCCGGGACGAGCGGTTCTGTACATAGTCTCCTGCTTCAGGCCGCG  
GCTGAGGCAGTTCATCCAGGTGCAGCCCGTGCTGGACCGGCTGCCGTCGCTGAGCGCGG  
AGGACAGGGACAGGGTGCCTGCGGCCGCCAGCAGCGGGGCGCGATGGCGGGCGCGG  
AGGAGCTGCTGCGAGCCGTGGAGCGGGGGCCCCGCGGCTGCGGCTGGATCCGCGAGTT  
CCTGCAGGCGCTGGAGCACGGTGGCTGCAGCCTGGCCGCCTGCTACGCCAGCCCCAGC  
CTGAGCCAGCTGCCCTCGCCGGCACAGGAGGCCGAGCACGACCTGTGCGTGCACCTGGT  
GCAGCTGCTGCACGGAACGCTGGTGGACAGGATGCGCACCGTGCCGGTGGCCGAGAAGT  
GCCTGGAGATGGGACTCTTCCAGGACGATGACATGGATCGGATCCAGGCTGTTACTGACA  
ATCATGGAAACAGAGATGGTGCAAGGGAGCTACTGAGCAGAATAGTCCAGAAGAAAGATT  
GGTTCTCTTCTTTTTTGGTTGCTCTCCGTGAAACCCAACATGAAGACCTTGCAGATGATTTA  
AGTGGAATACAGGA-----

GAGAATAAACAAAATGGGATGGAGCAGACTACAAACAAAGAGACAGAAGTTACAAGCCAAC  
CTGGACATGTCATGGAGGAGAATTTGAAACAGGAAAAAAATGCGGATGATAGTTTCAGCAG  
TGAGAACAGTGTGTTGAAACATCCACAGAGAAGAGTTCTATGGTGTGAGATCAGATGTC  
TCCATAGGAGATGGAAGTGTGAGTAAGTGAATGAAGACCTGGGACAGAGCTGCACAACC  
AGTGATTCAGATGAAGTGGAG-----

AGGAGAGCCTCACCTCAGCCAGATCTGACCCTGAGAGATTACCAGATGGAAGTTGCCAAG  
CCAGCACTGAATGGGGAGAATATTATAATATGTCTCCCTACGGGCAGTGGTAAAACAGAG  
TGGCTGTTTACGTTACCAAAGATCACTTGGATAAGAAGAGAAGAGCATCAGAGCCTGGAAA  
AGTCGTAGTACTTGTTAATAAGGTTCCATTGGTAGAACAGCATTTACAAACAGAGTTCAGTC  
CATTCTGAAGCGTTGGTATCAGGTTATTGGTTTAAGTGGTGAATCTCAGCTGAAAATCTCA  
TTTCTGAAGTTGTCAGAAAAAATGATGTCATCATCTGTACAGCACAGATCCTTGAGAATTC  
ACTGTTAAATGCATCCAAGGAAGAAGAGGAAGGTGTCCACTTATCAGATTTTTCCCTCATCA  
TTATTGATGAGTGTGATCACAACCTCAAAAGGAATGTGTCTACAACAATATAATGCGACGTTAC  
TTAAAAGAAAAGATGAAGAACAGGAAGCTGGCAAAAAGAAAACAAACCACTGATCCACAGC  
CTCAGATTCTGGGACTTACAGCCTCACCTGGTGTAGGAGGTGCAACGTCCCACTCGAAAG  
CTGAAGAGCATATTTTGAAAATCTGTGCCAATCTCGATGCATGTAGAATTATGACTGTTGAA  
GAGCATGCCTCCCAGCTAAAGAATCAGGTGAAGGAACCGGCTAAGAAGACTGTAATTGCA  
GATGACAAAAAAGGAATCCATTTAAAGAGAGAATTAGTGAGATCATGACAGAAATACAAAA  
CTATTGCCAGCTGCATCCCAAGTCTGAGTTTGGAAGTCAAGACATACGAACAGTGGGTGATC  
AGAGAAGAGAGAAGAGCTGCAAAAGAAGAAAAGCGCAGGGAACGTGTCTGTGCAGAACAC  
TTGAAGAAATACAATGATGCTCTCCAGATAAATGACACCATCCGAATGGTGGATGCCTACA  
ATCACCTAAATAGCTTCTATAAAGAGGAGCAAAGTAAGAAGACAGTAAGGAGTGATGATGA  
TGATGAACCAGCAGTATCTAAACAGGATGAAACAGATGAATTTCTAATAGGTTTATTTAATG  
CAAAAAGAAACAGCTGGAAGAGTTGACTGGAAATCCAGAAAATGAAAATGAGAAGTTAAT  
AAAGTTGAGAAATACTTTAATGGAGGAATTCACAAAGACTAAGGAACCTCGAGGAATCATT  
TCACAAAGACTCGTCTAAGTGCTCTGCTCTATTCCAGTGGATTAAGGACAACCCAAAATTT  
GAAGAAGTGGGAATTAGGGCTCATTATCTTATTGGCTCTGGACATAAGAGTGAAATGAAGC  
CCATGACTCAGAATGAACAAAGGGAAGTCATTGATAAATTTGACGTGGAAATGTAAATTTA  
CTAATTGCTACTACTGTAGCTGAGGAAGGCCTGGACATCAAAGAGTGTAATATCGTTATTC  
GCTATGGCCTCGTCACCAATGAAATTGCTATGGTGCAGGCTCGTGGGAGAGCTCGAGCTG

ATGAAAGCACCTATGCTGTTGTGGCTTCGACTGGCTCAGGGGCTATTGAATGTGAAGATGT  
TAATATTTTTTCGTGAGAAAATGATGTATAAGGCCATTGAGCGTGTCCAGAAGATGCCACAG  
GAAGAGTATTTAAATAAGATTGAGAGTTTCCAGTTGCAAAGTATAGTGGAACAAATGAA  
GACAAAGAGGGATCAGCTCAAGACATACAAGAAAAATCCTTCACTTATAAAATTCTTATGCA  
AAAATTGCTCCAAGCCGATATGTTCCGGAGAAGACATCCAAGTTATTGAAAACATGCATCAT  
GTCAGTGTGAAAAAGATTTCCAAAGTCATTATCATACAAGAGAAAATAAAACACTGCAGGA  
TAAGCAAGCTGATAATCAGACAAATGGGGAAATTATATGCAAAGACTGTGGACAAGCTTGG  
GGAAATATGATGGTTCACCGAGGTCTTGACCTGCCTTGTCTAAAGATTAGAAATTTTGTAGT  
TGTGTTTGCAGACAAGAAAAACAACAAAGGAAATTTTTAAGAGATGGGGAGATCTGCCCATC  
AGGTTTCCTAGTTTTGATTATGCAGCTCACTGTCCTTCAAGTGATGAAGAT

>mixornis\_gularis-passeriformes-mda5

ATGGCAGAGAGCACCCGGTACGAGCGGTTCTGTACGTAATCTCCTGCTTCAGGCCGCGG  
CTGAGGCAGTTCATCCAGGTGCAGCCCGTGTGACCGGCTGCCGTGCTGAGCGCGGA  
GGACAGGGACAGGGTGCGAGCAGCCGCCAGCAGCGGGGCGCGATGGCGGGCGCGGA  
GGAGCTGCTGCGGGCCGTGGAGCGGGGGCCCCGCGGCTGCGGCTGGATCCCCGAGTTC  
CTGCAGGCGCTGGAGCACGGTGGCTGCAGCCTGGCCGCTGCTACGCCAGCCCCAGCCT  
GAGCCAGCTRCCCTCGCCGGCACAGGAGGCCGAGCACGACCTGTGCGTGCACCTGGTGC  
AGCTGCTGCACGGCACGCTGGTGGACAGGATGCGCACCGTGCCGGTGGCCGAGAAGTGC  
CTGGAGATAGGAATCTTCCAGGACGAGGACATGGATCGGATCCAGGCTGTTACTGACAAT  
CATGGGAACAGAGATGGTGAAGGGAGCTACTGAGCAGAATAGTCCAGAAGAAAGATTGG  
TTCTCTTCTTTTTTGGTTGCTCTCCGTGAAACCCAACATGAAGACCTTGCAGATGATTAAAG  
TGGAATACAGGA-----

GAGAATAAACAAATGGGATGGAGCAGACTACAAACAAAGAGACAGAAGTTACAAGCCAAC  
CTGGACACGTCATGGAGGAGAATTTGAAACAGGAAGAAAATGTGGATGATAGTTTCAGCAG  
TGAGAACAGTGTGTTGAAACATCCACAGAAAAGAGCTCTATGGTGTGAGATCAGATGTC  
TCCATAGGAGATAGAAGTGTGAGTAAGTTGAATGAAGACGTGGGACAGAGCTGCACAACC  
AGTGATTCAGATGAAGTGGAG-----

AGAAGAGCCTCACCTCAGCCCGATCTGACCCTGAGAGATTACCAGATGGAAGTTGCCAAG  
CCAGCACTGAATGGGGAGAATATTATAATATGTCTCCCTACGGGCAGTGGTAAACCCAGAG  
TGGCTGTTTACATTACCAAAGATCACTTGGATAAGAAGAGAAGAGCATCAGAGCCTGGAAA  
AGTCATAGTACTTGTAAATAAGGTTCCATTGGTAGAACAGCATTTACAAGCAGAGTTTAGTC  
CATTCTGAAGCGTTGGTATCGGGTTATTGGTTTAAAGTGGTGATTCTCAGCTGAAAATCTCA  
TTTCCTGAAGTTGTCAGAAAGAAATGATGTCATCATCTGTACAGCACAGATCCTTGAGAATTC  
ACTGTTAAATGCATCCAAGGAAGAAGAAGAGGTGTCCACTTATCAGATTTTCCCTCATCA  
TTATTGATGAGTGTGATCAGCTCAAAAGGAATGTGTCTACAACAATATAATGCGACGTTAC  
TTAAAAGAAAAGATGAAGAACAGGAAGYTGGCAAAAGAAAACAAACCACTGATCCCACAGC  
CTCAGATTCTGGGACTTACAGCCTCACCTGGTGTAGGAGGTGCAACATCCTACTCAAAGC  
TGAAGAGCATATTTTGAATCTGTGCCAACCTCGATGCATGTAGAATTATGACTGTTGAAG  
AGCATGCCTCCCAGCTAAAGAATCACGTGAAGGAACCGTCTAAGAAGACTGTGATTGCAGA  
TGACAAAAAAGAGATCCATTTAAAGAGAGAATTAGTGAGATCATGACAGAAATACAAAATT  
ATTGCCAGCTACATCCCAAGTCTGAGTTTGGAACTCAGACATATGAACAGTGGGTGATCAG  
AGAAGAGAGAAGAGCTGCAAAAGAGGAAAAGCGCAGGGAACGTGTCTGTGCAGAACACTT  
GAAGAAATACAATGATGCTCTCCAGATAAATGACACCATCCGAATGGTGGATGCCTACAAT  
CACCTAAATAACTTCTATAAAGAGGAGAAAAGTAAGAAGACAGTAAGGAGTGATGATGATG

AAGAACCAGCAGGATCTAAACAGGATGAAACAGATGAATTTCTAATAGGTTTATTTAATGCA  
AAAAAGAAACAGCTGGAAGAGTTGACTGGAAATCCAGAAAATGAAAATGAGAAGTTAATAA  
AGTTGAGAAATACTTTAATGGAGGAGTTCACAAAGACTGAGGAACCTCGAGGAATCATTTT  
CACAAAGACTCGTCTAAGTGCCTCTGCTCTATTCCAGTGGATTAAGGACAACCCAAAATTT  
GAAGAAGTGGGAATTAGGGCTCATTATCTTATTGGCTCTGGACATAAGAGTGAAATGAAAC  
CCATGACTCAGAATGAACAAAGGGAAGTCATTGATAAATTTGACGTGGAAATGTAAATTTA  
CTAATTGCTACTACTGTAGCTGAGGAAGGCCTGGACATCAAAGAGTGTAATATTGTTATTG  
CTATGGCCTCGTCACCAATGAAATTGCTATGGTGCAGGCTCGTGGTAGAGCTCGAGCTGA  
CGAAAGCACCTATGCTGTTGTGGCTTCGACTGGCTCAGGGGCTATTGAATGTGAATATGTT  
AATCTTTTTTCGTGAGAAAATGATGTATAAGGCCATTCAGCGTGTCCAGAAGATGCCACAGG  
AAGAGTATTTAAATAAGATCGAGAGTTTCCAGTTGCAAAGTGTAGTGGAACAAATGAAG  
GCAAAGAGGGATCAGCTCAAGACATACAAGAAAAATCCTTCACTTATAAAATTTCTTATGCAA  
AAATTGCTCCAAGCYGATATGTTCCGGAGAAGACATCCAAGTTATTGAAAACATGCATCATG  
TCAGTGTGAAAAAAGATTTCCAAAGTCATTATCATACAAGAGAAAAATAAAACACTGCAGGAT  
AAGCAAGCTGATTACCAGACAAATGGGGAAATTATATGCAAAGACTGTGGACAAGCTTGGG  
GAAATATGATGGTTCACCGAGGTCTTGACCTGCCTTGTCTAAAGATTAGAAATTTTGTAGTT  
GTGTTTGCAGACAAGAAAAACAATAAGCAAATTTTTAAGAGATGGGGAGATCTGCCCATCA  
GGTTTCCTAGTTTTGATTATGCAGCTCATTGTCCTTCAAGTGATGAAGAT

>eopsaltria\_australis-passeriformes-mda5

ATGGCAGAGGCCAGCCGGGACGAGCGCTTCCTCTACATGATCTCCTGCTTCAGGCCGCG  
GCTGAGGCGGTTTCATCCAGGTGCAGCCCGTGCTGGACCAGCTGCCCTCGCTGAGCGCGG  
AGGACAGGGAGAGGGTGCGGGCGGCCGCCGTGCAGCGGGGCGCGGTGGCGGGGCGCGG  
AGGAGCTGCTGCGCGCCGTGGAGCGGGGGCCCCGCGGCTGCGGCTGGATCCGCGAGTT  
CCTGCAGGCGCTGGAGCACGGCGGCTGCGGCCTGGCCGCTGCTACGCCAACCCACG  
CTGAGCCAGCTGCCCTCGCCCGCCGAGGAGGCCGAGCACGACCTGTGCGTGCAGCTGGT  
GCAGCTGCTGCACGGCACGCTGGTGGACAGGATGCGCGCCGTGCAGGTGGCACACAAGT  
GCCTGGAGATGGGCATCTTCCAGGACGAGGACATGGATCGGATCCAGACTGTTACTGACA  
ATCATGGGAACAGAGATGGTGCAGAGGGAGCTACTGAGCAGAATAGTCCAGAAAAAGATT  
GGTTCTCTTCTTTTTTGGTTGCTCTTCGTGAAACCCAACATGAAGACCTTGCAGATGATTTA  
AGTGGAATACAGGAGGAACAGAGAATAAACAAAACGGGATGGAGAAGAGTCCAAATGAA  
AAAACAGAAGTTACAAGCCAACCAGGATACGTCATAGAGGAGAATTTGAAACAGGAAGAAA  
ATGTGGATGATAGTTTCAGCAGCGAGAACAGTATATTGGAAACATCCATAGAAAAGAATTCT  
GTGGTGTGAGAGTCAGATGCCTCCATAGGAGATGGAAGTGTGAGTAACTTGAATGAAAATC  
TGGAGCAGAGCTGCACAACGAGTGATTCAGATGAAGGGGAG-----

AGGAGAGCCTCACCTGAGCCAGATCTGATCCTGAGAGATTACCAAATGGAAGTTGCAAAG  
CCAGCACTGAATGGGGAGAATATTATAATATGTCTCCCTACGGGCAGTGGTAAACACAGAG  
TGGCTGTTTACATTACCAAAGATCATTTGGATAAGAAGAAAAGAGCATCAGAGCCTGGAAA  
AGTCATAGTACTTGTTAATAAGGTGCCATTGGTAGAACAGCATTTACAAAAAGAGTTTAGTC  
CATTCCTGAAGCATTGGTATCAGGTTACTGGTTTAAAGTGGTGATTCTCAGCTGAAAATCTCA  
TTTCCTGAAGTTGTCAGAAGAAATGATGTCATCATCAGTACAGCACAGATCCTTGAAAATTC  
ACTGTTAAATGCATCCAAGGAAGATGAAGAAGGTGTCCACTTATCAGATTTTTCCCTCATCA  
TTATCGATGAGTGTGATCACAACAAAAGGAGGGTGTCTACAACAATATAATGCGACGTTA  
CTTAAATGAAAAGATGAAGAACAAGAAGCTGGCAAAAAGAAAACAAACCACTGATCCACAG  
CCTCAGATTCTGGGACTTACAGCCTCACCTGGTGTAGGAGGTGCAACATCCTACTCAAAAG

CTGAAGAGCATATTCTGAAAATCTGTGCCAATCTTGATGCATGTAGAATTATGACTGTTGAA  
GAGCATGCCTCCCAGCTAAAGAATCAGGTGAAGGAACCGTCTAAGAAGACTGTGATTGCA  
GATGACAAAAAAGGGATCCATTTAAAGAGAGAATTATTGAGATCATGACAGAAATACAGAA  
CTATTGCCAGCTGCATCCAAAATCTGAATTTGGAACCTCAGACATATGAACAGTGGGTGATC  
AGAGAAGAGAGAAGAGCTGCCAAAGAAGAAAAACGCAGGGAACGTGTCTGTGCAGAACAC  
TTGAAGAAATACAATGATGCTCTCCAGATAAATGACACCATCCGAATGGTGGATGCCTACA  
ATCACCTAAATAACTTCTATAAAGAGGAGAAAAGTAAGAAGACAGTAAGAAGTGATGATGAT  
GATGAACCAGCAGTATCAAAACAGGATGAAACAGATGAATTTCTAATAGGTTTATTTAATGC  
AAAAAAGAAACAGCTGAAAGAGTTGAGTGGAAAGCCAGAAAATGAAAATGAGAAGCTTATA  
AAGTTGAGAAATACTTTAATGGAGGAGTTCACAAAGACTGAGGAACCTCGAGGAATCATCT  
TCACAAAGACTCGTCTAAGTGCCCTTTGCTCTATTCCAGTGGATTAAGGACAACCCAAAATTT  
GAAGAAGTGGGAATTAGGGGCCATTATCTTATTGGCTCTGGACATAACAGTGAAATGAAGC  
CTATGACTCAGAATGAGCAAAGGGAAGTTATTGATAAATTTGACATGGAACCTGTAAATTTA  
CTCATTGCTACTACTGTAGCTGAGGAAGGCCTGGACATCAAAGAGTGTAACATCGTTATTC  
GCTATGGCCTCGTCACCAATGAAATTGCTATGATGCAGGCTCGTGGTAGAGCTCGAGCTG  
ATGAAAGCACCTATGCTCTCGTGGCTTCGATTGGCTCAGGGTCTATTGAGCGTGAAGATGT  
TAATATTTTTTCGTGAGAAAATGATGTATAAGGCCATTCAGCGCGTCCAGAAGATGCCACAG  
GAGGAGTATCTAAATAAGATTCAGAGTTTTCCAGTTGCAAAGTATAGTGGAAAAAAAATGAA  
GGCAAAGAGAGATCAGCACAAAGACATACAAGAAAAATCCTTCACTAATAAAATTCTTATGCA  
AAAATTGCTCCAAGCCGATATGTTCTGGAGAAGACATACAAGTTATTGAAGACATGCATCAT  
GTCAGTGTGAAAGAAGATTTCCAAAGTCTTTATCATAACAAGAGAAAATAAAACACTGCAAGA  
TAAGAATGCTGATTACCAGACAAATGGGGAAATTATATGTAAAGACTGTGGACAAGCTTGG  
GGAAATATGATGGTTCACCGTGGTCTTGACCTGCCTTGTCTAAAGATTAGAAATTTTGTGGT  
TGTGTTTGCAGACAAGAAAGCAACAAGAAAATTTTTAAGAAATGGGGAGAACTGCCCATC  
AGGTTTCCTAGTTTTTGATTATGCAGCTCATTGTCCTTCGAGTGATGAAGAT

>phylloscopus\_trochilus-passeriformes-mda5

ATGGCGCAGGGCAGCCGGGACGAGCTGTTCTCTACATGATCTCCTGCTTCAGGCCGCG  
GCTGAAGCAGTTCATCCAGGTGCAGCCCGTGCTGGACCGGCTGCCGTGCTGAGCGCAG  
AGGACAGGGACCGTGTGCGTGCGGCCGCCCTGCAGCGCGGCGCGGCGGGCGGCCG  
AGGAGCTGCTGCGCGCCGTGGAGCGGGGGCCCCGCGGCTGCGGCTGGATCCGCGAGTT  
CCTGCAGGCGCTGGAGCACGGTGGCTGCAGCCTGGCCGCCTGCTACGCCAACCCAGCC  
TGAGCCAGCTGCCCTCGCCGGCACAGGAGGCCGAGCACGACCTGTGCGTGACCTGGTG  
CAGCTGCTGCACGGCACGCTGGTGGAAAGGATGCGCGCCGTGCCGGTGGCCGAGAAGT  
GCCTGGAGATGCAAATCTTCCAGGACGAGGACGTGGATCGGATCCAGACTGTTACTGACA  
ATCATGGGAACAGAGATGGTGCAAGGGAGCTACTGAGCAGAATAGTCCAGAAGAAAGATT  
GGTTCTCTTCTTTTTTGCTTGCTCTCCGTGAAACACAACATGAAGACCTCGCAGATGATTTA  
AGTGGAATACAGGA-----

GAGAATAAACAAATTGGGATGGAGCAGACTGCAAATGAAGAGACAGAAGTTACAAGCCAAC  
CTGGACACGTCACAGAGGAGAATTTGAAACAGGAAGAAAATGTGGATGATAGTTTCAGCAG  
TGAGAACAGTGTGTTGGAAACATCCATAGAAAAGAATTCTGTGGTATCAGAATCAGATGTCT  
CCATAGGAGATGAAAGTGTGAGTAAGTTGAATGAAAACCTGGGACAGAGCTGCACAACCA  
GTGATTGAGATGAAGTGGAG-----

AGGAGAGCCTCACCCCAGCCAGATCTGACCCTGAGAGATTACCAGATGGAAGTTGCAAAG  
CCAGCACTGAATGGGGAGAATATTATAATATGTCTCCCTACGGGCAGTGGTAAAACCAGAG

TGGCTGTTTACATTACCAAAGATCACTTGGATAAGAAGAAAAGAGCATCAGAGCCTGAAAA  
AGTCATAGTACTTGTTAATAAGGTTCCATTGGTAGAACAGCATTTACAAAGAGAGTTTGGTC  
CATTCCTGAAGCGTTGGTATCAGGTTATTGGTTTAAGTGGTGATTCTCAGCTGAAAATCTCA  
TTTCCTGAAGTTGTCAGAAGAAATGATGTCATCATCAGCACAGCACAGATCCTTGAGAATTC  
ACTGTTAAATGCATCCAAGGAAGATGAGGAAGGTGTCCGCTTATCAGATTTTTCCCTCATCA  
TTATTGACGAGTGTATCACACTCAAAAGGAAGGTGTCTACAACAATATAATGCGACGTTAC  
TTAAAAGAAAAGGTGAAGAACAGGAAGCTGGCAAAAGAAAACAAACCAGTGATCCACAGC  
CTCAGATTCTGGGACTTACAGCCTCACCTGGTGTAGGAGGTGCAACATCCTACTCAAAAGC  
TGAAGAGCATATTTTGAAAATCTGTGCCAATCTCGATGCATGTAGAATTATGACTGTTGAAG  
AGCATGCCTCCCAGCTAAAGGATCAGGTGAAGGAACCGTCTAAGAAGACTGTGATTGCAG  
ATGACAAAGAAAAGAGATCCATTTAAAGAGAAAATTACTGAGATCATGACAGAAATACAAAC  
TACTGCCAGCTGCATCCCAAGTCTGAGTTTGGAAGTCTCAGACATATGAACAGTGGGTGATCA  
GAGAAGAGAGAAGAGCTGCAAAAGAGGAAAAACGCAGGGAACGTGTCTGTGCAGAGCAC  
CTGAAGAAATACAATGATGCTCTCCAGATAAACGACACCATCCGAATGGTGGATGCCTACA  
ATCACCTAAATAACTTCTACAAAGAGGAGAAAAGAAAGAAGGCAGCAAGGAGTGATGATGA  
TGATGAACCAGCAGTATCTAAACAGGATGAAACAGATGAATTTCTAATAGGTTTATTTTCATG  
CAAAAAAGAAACAACTGAAAGAGTTGACTGGAAAGCCAGAAAATGAAAATGAGAAGCTAAC  
AAAGTTGAGAAGTACTTTAATGGAGGAGTTCACAAAGATTGAGGAACCTCGAGGAATCATT  
TTCACAAAGACACGTCTAAGTGCCTTTGCTCTATTCCAGTGGATTAAGGACAACCCAAAATT  
TGAAGAAGTGGGAATTAAGGCCATTATCTTATCGGCTCAGGACATAAGAGTGAAATGAAG  
CCCATGACTCAGAATGAGCAAATGGAAGTTATTGATAAATTTGACGTGGAAATATAAATTT  
ACTAATTGCTACTACTGTAGCTGAGGAAGGCCTGGACATCAAAGAGTGTAATTCGTTATT  
CGCTATGGGCTCGTCACCAATGAAATTGCTATGGTGCAGGCTCGTGGTAGAGCTCGAGCT  
GATGAAAGCACCTATGCTCTTGTGGCTTCAAGTGGCTCAGGGGCTGTTGAACGTGAAGAT  
GTTAATATTTTTTCGTGAGAAAATGATGTATAAGGCCATTGAGCGTGTCCAGAACATGCCACA  
GGAAGAGTATTTAAAAAGATTGAGAGTTTCCAGTTGCAAAGTATACTGGAAAAACAAATGA  
AGGCAAAGAGAGATCAGCTCAAGACATACAAGAAAAATCCTTCGCTAATAAAATTCTTATGC  
AAAAATTGCTCCAAGCCGATATGTTCTGGAGAAGACATACAAGTTATTGAAGACATGCATCA  
TGTCAGTGTGAAAAAAGATTTCCAAAGTCATTATCATACAAGAGAAAATAAAACACTGCAGG  
ATAAGCATGCTGATTACCAGACAAATGGGGAAATAATATGCAAAGACTGTGGACAAGCTTG  
GGGAAATATGATGGTTCACCGAGGTCTTGACCTGCCTTGTCTAAAGATTAGAAATTTTGTG  
GTTGTGTTTGCAGACAAGAAAACAACAAAACAAATTTTTAAGAAATGGGGGGATCTGCCCA  
TCAGGTTTCCTAGTTTTGATTATGCAGCTCATTGTCCTTCAAGTGATGAAGAT

>corvus\_moneduloides-passeriformes-md5

ATGGCAGACAGCACCCGGGACGAGCTGTTCTGTACATGATCTCCTGCTTCAGACCGCGG  
CTGAAGCAGTGCATCCAGGTGCAGCCCGTGCTGGACCGGCTCCCCTCGCTGAGCGCGGA  
GGACAGGGAGAGGGTGCGTGCGGCCGCCCTGCAGCGGGGCCAGGCGGCGGGGGCGGA  
GGAGCTGCTGCGGGCCGTGGAGCGGGGGCCCCGCGGCTGCGGCTGGATCCGCGAGTTC  
CTGCAGGCGCTGGAGCACGGCGGCTGCAGCCTGGCCGCTGCTACGCCAACCCAGCCT  
GAGCCAGCTGCCCTCGCCGGCAGAGGAGGCCGAGCACGACCTCTGCGTGCACCTGGTGC  
AGCTGCTCCACGGCACGCTGGTGGACAGGATGCGGACCGTGACAGGTGGCCGAGAAGTGC  
CTGGAGATGGGCATCTTCCAGGACGAGGACATGGATCGGATCCAGACAGTTGCTGACAA  
CGTGGGAACAGAGATGGCGCGAGGGAAGTACTGAGCAGAATAGTGAGAAGAAAGATTG  
GTTCTCTTCTTTTTTGGTTGCTCTCCGTGAACTCAACATGAAGACCTTGCAGATGATTTAA

GCGGAAATACAGGAGGAACAGAAAATAAACAAAATGGGATGGAGAAGAGTACAAACGAAG  
AAGCAGAAGTTACAAGCCAACCAGGATACCTCAGAGCAGATAATTTGAAACAGGAAGAAAA  
TGTGGATGATAGTTTCAGCAGTGAGAACAGTGTATTGGAAACATCCATAGAAAAGAATTCT  
GTGGTGTCTCAGACTCAGATGTCTCCATAGGAGATGGAAATGTCAGTAACTTGAATGAAAACC  
TGGGACAGAGCTGCACAACCAGTGATTCAGATGAAGGGGAG-----

AGGAGAGCCTCACCTGAGCCAGATCTGACCCTGAGAGATTACCAGATGGAAGTCGCAAAG  
CCAGCGCTGAATGGGGAGAATATTATAATATGTCTCCCTACGGGCAGTGGTAAACCCAGAG  
TGGCTGTTTACATTACCAAAGATCACTTGGATAAGAAGAGAAGAGCATCAGAGCCTGGAAA  
AGTCATAGTACTTGTTAATAAGGTGCCATTGGTAGAACAGCATTACAAACAGAGTTCAGCC  
CATTCCTGAAGCGTTGGTATCAGGTTATTGGTTTAAGTGGTGATTCTCAGCTGAAAATCTCA  
TTTCCTGAAGTTGTCAGAAGAAATGATGTCATCATCAGTACAGCACAGATCCTTGAGAATTC  
ACTGTTAAATGCATCCAAGGAAGATGAAGAAGGTGTCCACTTATCAGATTTTTCCCTCATCA  
TTATCGATGAGTGCCATCACACTCAAAGGAAGGTGTCTACAACAATATAATGCGACGTTA  
CTTAAAGAGAGAAGATGAAGAACAAAAAGCTGGCAAAAGAAAACAAACCACAGATCCCACAG  
CCTCAAATTCTGGGACTGACAGCCTCACCTGGTGTAGGAGGTGCAACATCCTACTCAAAG  
CTGAAGAGCATATTCTGAAAATCTGTGCCAATCTTGATGCATGTAAATTATGACTGTTGAA  
GAGCATGTCTTCCAACCTGAAGAATCAGGTAAAGGAGCCCTCTAAGAAGACTGTGATTGCAG  
ATGACAAAAAAGGGATCCATTTAAAGAGAGAATTACTGAGATAATGACAGAAATACAAAT  
TATTGCCAGTTGCATCCAAATCTGAGTTTGGAACTCAGACATATGAACAGTGGGTGATCA  
GAGAAGAGAGAAGAGCTGCAAAAGAAGAAAAACGCAGGGAACGTGTCTGTGCAGAACT  
TGAAGAAATACAATGATGCTCTCCAGATAAATGACACCATCCGAATGGTGGATGCCTATAAT  
CACCTAAATAACTTCTATAAAGAGGAGAAAAGTAAGAAGACAGTAAGGAGTGATGATGATG  
ATGAACCAGCAGTATCAAAACAGGATGAAACAGATGAATTTCTAATGGGTTTATTTTCATGCA  
AAAAAGAATCAGCTGAAAGAGTTGACTAGACAGCCAGAAAATGAAAATGAGAAGCTAATAA  
AGTTGAGAAATACTCTAATGGAGGAGTTCACAAAGACTGAGGAACCTCGAGGAATTATTTT  
CACAAAGACTCGTCTAAGTGCCCTTTGCTCTATCCAGTGGAATTAAGGACAACCCAAAATTT  
GAAGAAGTGGGAATTAAGGCCATTATCTTATCGGCTCTGGTCATAACAGTGAGATGAAGC  
CCATGACTCAGAATGAACAAAGGGAAGTTATTGATAAATTTGACGTGGAAATGTAAATTTA  
CTAATTGCTACTACTGTAGCTGAGGAAGGCCTGGACATCAAAGAGTGTAACATTGTTATTC  
GCTATGGCCTCGTCACCAATGAAATTGCTATGCTGCAGGCTCGTGGTCGAGCTCGAGCTG  
ATGAAAGCACCTATGCTCTTGTGGCTTCAAGTGGCTCAGGGGCTGTTGAACGTGAAGATGT  
TAATATTTTTTCGTGAGAAAATGATGTATAAGGCCATTCAGCGTGTCCAGAAGATGCCACAG  
GAAGAGTATTTAAATAAGATTACAGAGTTACCAGTTGCAAAGTATAGTGGAAGCAAAATGAA  
GGCAAAGAGAGATCAGCGCAAGACATACAAGAAAAATCCTTCACTGATAAAATTCTTATGC  
AAAATTGCTACAAGCCAGTATGTTCTGGAGAAGACATACAAGTTATTGAAGACATGCATCA  
TGTCAGTGTGAGAAAAGATTTCCAAAGTCTTTATCATACAAGAGAAAATAGAACACTGCAAG  
ATAAGCATGCTGATTACCAGACCAATGGGGAAATTATATGTAAACACTGTGGACAAGCTTG  
GGGAAATATGATGGTACACCGAGGTCTTGACCTGCCTTGCCTAAAGATTAGAAATTTTGTG  
GTTGTGTTTGCAGACAAGAAAACAACAAAGCAAATTTTTAAGAAATGGGGAGAACTGCCCA  
TCAGGTTTCCTGGTTTTGATTATGCAGCTCATTGTCCTTCAAGTGATGAATAT

>pseudorectes\_ferrugineus-passeriformes-mda5

ATGGCGGACAGCACCCGGGACGAGCTGTTCTGTACCTGATCTCCTGCTTCAGGCCGCG  
GCTGAAGCAGTGCATCCAGGTGCAGCCCGTGCTGGACGGGCTGCCCTCGCTGAGCGCGG  
AGGACCGGGAGCGGGTGCGTGCGGCCGCCCTGCAGCGGGGCCAGGCGGCGGGGGCGG



AGGAGCTGCTGCGGGCCGTGGAGCGGGGGCCCCGCGGCTGCGGCTGGATCCGCGAGTT  
CCTGCAGGCGCTGGAGCACGGCGGCTGCAGCCTGGCCGCCTGCTACGCCAACCCACGC  
CTGAGCCAGCTGCCCTCGCCGGCAGAGGAGGACGAGCACGACCTCTGCGTGCACCTGGT  
GCAGCTGCTCCACGGCACGCTGGTGGACAGGATGCGGACCGTGCAGGTGGCCGAGAAGT  
GCCTGGAGATGGGCATCTTCCAGGAGGAGGACATGGATCGGATCCAGACTGTTACAGACA  
ATCGTGGGAACAGAGATGGTGCAAGGGAGCTCCTGAGCAGAATAGTGCAGAAGAAAGATT  
GGTTCTCTTCTTTTTTGATTGCTCTCCGTGAAACTCAACATGAAGACCTTGCAGATGATTTA  
AGTGGAATACAGGA-----  
GAGAATAAACAAAATGGGATGGAGAAGGGTACAAACGAAGAACCAGAAGTTACAAGCCAA  
CCAGGATACATCATAGCAGAGAATTTGAAACAGGAAGAAAATGTGGATGATAGTTTCAGCA  
GTGAGAACAGTGTATTGGAAACATCCATAGAAAAGAATTCTGTGGTGTGAGAGTCAGATGT  
CTCCATAGGAGATGGAAGTGTGAGTAACCTGAATGAAAATCTGGGACAGAGCTGCACAACC  
AGTGATTCAGATGAAGTGGAG-----  
AGGAGAGCCTCACCTGAGCCAGATCTGACCCTGAGAGATTACCAGATGGAAGTTGCAAAG  
CCAGCACTGAATGGGGAGAATATTATAATATGTCTCCCTACGGGCAGTGGTAAAACCAGAG  
TGGCTGTTTACATTACCAAAGACCACTTGGATAAGAAGAGAAGAGCATCAGAGCCTGGAAA  
AGTCATAGTACTTGTTAATAAGGTGCCATTGGTAGAACAGCATTTACAAACAGAGTTTGGTC  
CATTCCTGAAGCGTTGGTATCAGGTTACTGGTTTAAGTGGTGAATTCAGCTGAAAATCTCA  
TTTCCTGAAGTTGTCAAAAGAAATGATGTCATCATCAGTACTGCACAGATCCTTGAGAATTC  
GCTGTTAAATGCATCCAAGGAAGATGAAGAAGGTGTCCACTTATCAGATTTTTCCCTCATCA  
TTATCGATGAGTGTGATCACAACCTCAAAAGGAAGGTGTCTACAACAATATAATGCGACGTTAC  
TTAAAAGAAAAGATGAAGAACAGGAAGCTGGCAAAAGAAAACAAACCACTGATCCACAGC  
CTCAGATTCTGGGACTGACAGCCTCACCTGGTGTAGGAGGTGCAACATCCTACTCAAAAG  
CTGAAGAGCATATTCTGAAAATCTGTGCCAATCTTGATGCATGTAGAATTATGACTGTTGAA  
GAGCATGCCTCCCAGCTAAAGAATCAGGTAAAGGAACCGTCTAAGAAGACTGTGATTGCA  
GATGACAAAAAAGGGATCCATTTAAGGAGAGAATTACTGAGATTATGACAGAAATACAAAA  
TTATTGCCAGTTGCATCCAAAATCTGAGTTTGGAACCTCAGACATATGAACAGTGGGTGATCA  
GAGAAGAGAGAAGAGCTGCAAAAGAAAGAAAACGCGAGGGAACGTGTCTGTGAGAACACT  
TGAAGAAATACAATGATGCTCTCCAGATAAATGACACCATCCGAATGGTGGATGCCTACAA  
TCACCTAAATAACTTTTATAAAGAGGAGAGAAAAGTAAGAAGACAGTAAGGAGTGATGATGATG  
ATGAACCAGCAGTATCAAAACAGGATGAAACAGATGAATTTCTAATAGGCTTATTTTCATGCA  
AAAAAGAAGAAGCTGAAAGAGTTGAGTGGAAAGCCAGAAAATGAAAATGAGAAGCTAATAA  
AGTTGAGAAATACTTTAATGGAGGAGTTCACAAAGACTGAGGAACCTCGAGGAATTATTTTC  
ACAAAGACTCGTCTAAGTGCCCTTTGCTCTCTCCAGTGGATTAAGGACAACCCAAAATTTGA  
AGAAGTGGGAATTAGGGCCCATATCTTATCGGCTCTGGACATAACAGTGAGATGAAGCCC  
ATGACTCAGAATGAGCAAAGGGAAGTTATTGATAAATTTGACGTGGAAATGTAAATTTACT  
AATTGCTACTACTGTAGCTGAGGAGGGCCTGGACATCAAAGAGTGTAACATTGTTATTCGC  
TATGGCCTCGTCACCAATGAAATTGCTATGGTGCAGGCTCGTGGTCGAGCTCGAGCTGAT  
GAAAGCACCTATGCTCTTGTGGCTTCAAGTGGCTCAGGGGCTGTTGAACGTGAAGATGTTA  
ATATTTTTCGTGAGAAAATGATGTATAAGGCCATTCAGCGTGTCCAGAAGATGCCACAGGA  
AGAGTATTTAATAAGATTCAGAGTTTCCAGTTGCAAAGTATAGTGGAAAAACAAATGAAGG  
CAAAGAGAGATCAGCGCAAGACATACAAGAAAATCCTTCACTAATAAAATTTCTTATGCAAA  
ACTTGCTACAAGGCGATATGTTCTGGAGAAGACATACAAGTTATTGAAGACATGCATCATGT  
CAGTGTGAAAAAAGATTTCCAAAGTCTTTATCACACAAGAGAAAATAAAACACTGCAAGATA

AGCATGCTGATTACCAGACCAATGGGGAAATTATATGTAAAGACTGTGGACAAGCTTGGGG  
AAATATGATGGTTCACCGAGGTCTTGACCTGCCTTGTCTAAAGATTAGAAATTTTGTGGTTG  
TGTTTGCGGACAAGAAAACAACGAAGCAAATTTTAAAGAAATGGGGAGAACTGCCCATCAG  
GTTTCCTGGTTTTGATTATGCAGCTCATTGTCCTTCAAGTGATGAAGAT

>paradisaea\_rubra-passeriformes-mda5

ATGGCAGACAGCACCCGGGACGAGCTGTTCTGTACATCATCTCCTGCTTCAGGCCGCGG  
CTGAAGCAGTGGATCCAGGTGCAGCCCGTGCTGGACCTGCTCCCCTCGCTGAGCGCGGA  
GGACAGGGAGAGGGTGCGTGCGGCCGCCCTGCAGCGGGGCCAGGCGGCGGGGGCGGA  
GGAGCTGCTGCGGGCCGTGGAGCGGGGGCCCCGCGGCTGCGGCTGGATCCGCGAGTTC  
CTGCAGGCGCTGGAGCACGGCGGCTGCAGCCTGGCCGCCTGCTACGCCAACCCAGCCT  
GAGCCAGCTGCCCTCGCCGGCAGAGGAGGCCGAGCACGACCTCTGCGTGCACCTGGTGC  
AGCTGCTGCACGGCACGCTGGTGGACAGGATGCGGACCGTGACGGTGGCCGAGAAGTGC  
CTGGAGATGGGCATCTTCCGGGACGAGGACATGGATCAGATCCAGACTGTTGCTGACAA  
CGTGGGAACAGAGATGGTGCAAGGGAGCTACTGAGCAGAATAGTGCAGAAGAAAGATTGG  
TTCTCTTCTTTTTGATTGCTCTCCGTGAAACTCAACATGAAGACCTTGCAGATGATTTAAG  
CGGAAATACAGGAGGAACAGAGAATAAACAAAATGGGATGGAGAAGAGTACCAACAAAGA  
AGCAGAAGTTACAAGCCAACCAGGATACATCACAGCGGAGAATTTGAAACAGGAAGAAAA  
GTGGATGATAGTTTCAGCAGTGAGAACAGTGTATTGAAACATCCATAGAAAAGAATTCTG  
TGGTGTGAGAGTCAGATGTCTCCATAGGAGATGGAAGTGTGAGTAACCTGAATGAAAACCT  
GGGAGAGAGCTGCACAACCAGTGATTGAGATGAAGGGGAG-----

AGGAGAGTCTCACCTGAGCCAGATCTGACCCTGAGAAATTACCAGATGGAAGTTGCAAAG  
CCAGCACTGAATGGGGAGAATGTTATAATATGTCTCCCTACAGGCAGTGGTAAACCAGAG  
TGGCTGTTTACATTACCAAAGATCACTTGGATAAGAAGAGAAGAGCATCAGAGCCTGGA  
AGTCATAGTACTTGTTAATAAGGTGCCATTGGTAGAACAGCATTTACAAACAGAGTTCAGTC  
CATTCCTGAAGCGTTGGTATCAGGTTATTGGTTAAGTGGTATTCTCAGCTGAAAATCTCA  
TTTCCTGAAGTTGTCAGAAGAAATGATGTCATCATCAGTACAGCACAGATCCTTGAGAATTC  
ACTGTTAAATGCATCCAAGGAAGATGAAGAGGGTGTCCACTTATCAGATTTTTCCCTCATCA  
TTATCGATGAGTGTATCACACTCAAAGGAAGGTGTCTACAACAATATAATGCGACGTTAC  
TTAAAGAAAAGATGAAGAACAGGAAGCTGGCAAAAGAAAACAAACCACAGATCCCACAGC  
CTCAGATTCTGGGACTGACAGCCTCACCTGGTGTAGGAGGTGCAACATCCTACTCAAAG  
CTGAGGAGCATATTCTGAAAATCTGTGCCAATCTTGATGCATGTAGAATTATGACTGTTGAA  
GAGCATGTCTCCAGCTAAAAATCAGGTAAAGGAACCGTCTAAGAAGACTGTGATTGCAG  
ATGACAAAAAAGGGATCCATTTAAAGAGAGAATTACTGAGATCATGACAGAAATACAAAT  
TATTGCCAGTTGCATCCAAATCTGAGTTTGGAACCTCAGACATATGAACAGTGGGTGATCA  
GAGAAGAGAAAAGAGCTGCAAAAGAGAAAAACGCAGGGAACGTGTCTGTGCAGAACACT  
TGAAGAAATACAATGATGCTCTCCAGATAAATGACACCATCCGAATGGTGGATGCCTACAA  
TCACCTAAATAACTTTTATAAAGAGGAGAAAAAGTAAGAAGACAGTAAGGAGTGATGATG  
ATGAACCAGCAGTATCAAACAGGATGAAACAGATGAATTTCTAATAGGTTTATTTTCATGCA  
AAAAAGAAACAGCTGAAAGAGTTGACGGGAAAGCCAGAAAATGAAATGAGAAGCTAATAA  
AGTTGAGAAATACTTTAATGGAGGAGTTCACAAAGACTGAGGAACCTCGAGGAATTATTTTC  
ACAAAGACTCGTCTAAGTGCCTTTGCTCTATTCCAGTGGATTAAGGACAACCCGAAATTTGA  
AGAAGTGGGAATTAGGGCCCATTATCTTATTGGCTCTGGACATAACAGTGAGATGAAGCCC  
ATGACTCAGAATGAGCAAAGGGAAGTTATTGATAAATTTTCGACGTGGAATGTAAATTTACT  
AATTGCTACTACCGTAGCTGAGGAAGGCCTGGACATCAAAGAGTGTAACATTGTTATTCGC

TATGGCCTTGTCACCAATGAAATTGCTATGCTGCAGGCTCGTGGTCGAGCTCGAGCTGATG  
AAAGCACCTATGCTCTTGTGGCTTCAAGTGGCTCAGGGGCTGTTGAACGTGAAGATGTAA  
TATTTTTCGTGAGAAAATGATGTATAAGGCCATTGAGCGTGTCCAGAAGATGCCACAGGAA  
GAGTACTTAAACAAGATTCAGAGTTTCCAGTTGCAAAGTATAGTGGAAAAGCAAATGAAGG  
CAAAGAGAGATCAGCGCAAGACATACAAGAAAAATCCTTCACTAATAAAATTCTTATGCAAA  
ACTTGCTACAAGCCAGTATGTTCTGGAGAAGACATACAAGTTATTGAAGACATGCATCATGT  
CAGTGTGAGAAAAGATTTCCAAAGTCTTTATCAAACAAGAGAAAATAAAACTCTGCAAGATA  
AGCGTGCTGATTACCAGACCAATGGGGAAATTATATGTAAACACTGTGGACAAGCTTGGGG  
AAATATGATGGTACACCGAGGTCTTGACCTGCCTTGTCTAAAGATTAGAAATTTTGTGGTTG  
TGTTTGCAGACAAGAAAACAACAAAGCAAATTTTTAAGAAATGGGGAGAACTGCCCATCAG  
GTTTCCTGGTTTTGATTATGCAGCTCATTGTCCTTCAAGTGAGGAAGAT

>parotia\_lawesii-passeriformes-mda5

ATGGCAGACAGCACCCGGGACGAGCTGTTCTGTACATCATCTCCTGCTTCAGGCCGCGG  
CTGAAGCAGTGGATCCAGGTGCAGCCCGTGCTGGACCGGCTCCCCTCGCTGAGCGCGGA  
GGACAGGGAGAGGGTGCGTGCGGCCGCCCTGCAGCGGGGCCAGGCGGCGGGGGCGGA  
GGAGCTGCTGCGGGCCGTGGAGCGGGGGCCCCGCGGCTGCGGCTGGATCCGCGAGTTC  
CTGCAGGCGCTGGAGCACGGCGGCTGCAGCCTGGCCGCTGCTACGCCAACCCAGCCT  
GAGCCAGCTGCCCTCGCCGGCAGAGGAGGCCGAGCACGACCTCTGCGTGCACCTGGTGC  
AGCTGCTCCACGGCACGCTGGTGGACAGGATGCGGACCGTGCAGGTGGCCGAGAAGTGC  
CTGGAGATGGGCATCTTCCGGGACGAGGACATGGATCAGATCCAGACTGTTGCTGACAAT  
CGTGGGAACAGAGATGGTGCGAGGGAGCTACTGAGCAGAATAGTGCAGAAGAAAGATTG  
GTTCTCTTCTTTTTTATTGCTCTCCGTGAACTCAACATGAAGACCTTGCAGATGATTTAA  
GCGGAAATACAGGAGGAACAGAGAATAAACAAAATGGGATGGAGAAGAGTACAAACAAA---  
GCAGAAGTTACAAGCCAACCAGGATACATCACAGCGGAGAATTTGAAACAGGAAGAAAATG  
TGGATGATAGTTTCAGCAGTGAGAACAGTGTATTGGAAACATCCATAGAAAAGAATTCTGT  
GGTGTGAGAGTCAGATGTCTCCATAGGAGATGGAAGTGTGAGTAAGTGAATGAAAACCTG  
GGACAGAGCTGCACAACCAGTGATTCAGATGAAGGGGAG-----

AGGAGAGCCTCACCTGAGCCAGATCTGACCCTGAGAGATTACCAGATGGAAGTTGCAAAG  
CCAGCACTGAATGGGGAGAATGTTATAATATGTCTCCCTACAGGCAGTGGTAAAACCAGAG  
TGGCTGTTTACATTACCAAAGATCACTTGGATAAGAAGAAAAGAGCATCAGAGCCTGGAAA  
AGTCATAGTACTTGTTAATAAGGTGCCATTGGTAGAACAGCATTTACAAACAGAGTTTAGTC  
CATTCTGAAGCGTTGGTATCAGGTTATTGGTTTAAGTGGTGATTCTCAGCTGAAAATCTCA  
TTTCCTGAAGTTGTCAGAAGAAATGATGTCATCATCAGTACAGCACAGATCCTTGAGAATTC  
ACTGTTAAATGCATCCAAGGAAGATGAAGAAGGTGTCCACTTATCAGATTTTTCCCTCATCA  
TTATCGATGAGTGTGTCATCACTCAAAAGGAAGGTGTCTACAACAATATAATGCGACGTTAC  
TTAAAAGAAAAGATGAAGAACAGGAAGCTGGCAAAAAGAAAACAAACCACAGATCCCGCAGC  
CTCAGATTCTGGGACTGACAGCCTCACCTGGTGTAGGAGGTGCAACATCCTACTCAAAAG  
CTGAGGAGCATATTCTGAAAATCTGTGCCAATCTTGATGCATGTAGAATTATGACTGTTGAA  
GAGCATGTCTCCAGCTAAAAAATCAGGTAAAGGAACCGTCTAAGAAGACTGTGATTGCAG  
ATGACAAAAAAGGGATCCATTTAAAGAGAGAATTACTGAGATCATGACAGAAATACAAAAT  
TATTGCCAGTTGCATCCAAAATCTGAGTTTGGAACTCAGACATATGAACAGTGGGTGATCA  
GAGAAGAGAAAAGAGCTGCAAAAGAAGAAAAACGCAGGGAACGTGTCTGTGCAGAACT  
TGAAGAATAACAATGATGCTCTCCAGATAAATGACACCATCCGAATGGTGGATGCCTACAA  
TCACCTAAATAACTTTTTATAAAGAGGAGAGAAAAGTAAGAAGACAGTAAGGAGTGATGATGATG

ATGAACCAGCAGTATCAAAACAGGATGAAACAGATGAATTTCTAATAGGTTTATTTTCATGCA  
AAAAAGAAACAGCTGAAAGAGTTGACGGGAAAGCCAGAAAATGAAAATGAGAAGCTAATAA  
AGTTGAGAAATACTTTAATGGAGGAGTTCACAAAGACTGAGGAACCTCGAGGAATTATTTTC  
ACAAAGACTCGTCTAAGTGCCTTTGCTCTATTCCAGTGGATTAAGGACAACCCGAAATTTGA  
AGAAGTGGGAATTAGGGCCCATTTATCTTATCGGCTCTGGACATAACAGTGAGATGAAGCCC  
ATGACTCAGAATGAGCAAAGGGAAGTTATTGATAAATTTTCGACGTGGAATGTAAATTTACT  
AATTGCTACTACCGTAGCTGAGGAAGGCCTGGACATCAAAGAGTGTAACATTGTTATTCGC  
TATGGCCTTGTCACCAACGAAATTGCTATGCTGCAGGCTCGTGGTCGAGCTCGAGCTGAT  
GAAAGCACCTATGCTCTTGTGGCTTCAAGTGGCTCAGGGGCTGTTGAACGTGAAGATGTTA  
ATATTTTTCTGAGAAAATGATGTATAAGGCCATTACGCGTGTCCAGAAGATGCCACAGGA  
AGAGTATTTAAACAAGATTCAGAGTTTCCAGTTGCAAAGTATAGTGGAAAAGCAAATGAAGG  
CAAAGAGAGATCAGCGCAAGACATAACAAGAAAAATCCTTCACTAATAAAATTCCTATGCAAA  
ACTTGCTACAAGCCGGTATGTTCTGGAGAAGACATAACAAGTTATTGAAGACATGCATCATG  
TCAGTGTGAGAAAAGATTTCCAAAGTCTTTATCAAACAAGAGAAAATAAACTCTGCAAGAT  
AAGCGTGCTGATTACCAGACCAATGGGGAAATTATATGTAAACACTGTGGACAAGCTTGGG  
GAAATATGATGGTACACCGAGGTCTTGACCTGCCTTGTCTAAAGATTAGAAATTTTGTGGTC  
GTGTTTGCAGACAAGAAAACAACAAAGCAAATTTTAAAGAAATGGGGAGAACTGCCCATCA  
GGTTTCCTGGTTTTGATTATGCAGCTCATTGTCCTTCAAGTGATGAAGAT

>cicinnurus\_regius-passeriformes-mda5

ATGGCAGACAGCACCCGGGACGAGCTGTTCTGTACATCATCTCCTGCTTCAGGCCGCGG  
CTGAGGCAGTGGATCCAGGTGCAGCCCGTGCTGGACCGGCTCCCCTCGCTGAGCGCGGA  
GGACAAGGAGAGGGTGCGTGCGGCCGCCCTGCAGCGGGGCCAGGCGGCGGGGGCGGA  
GGAGCTGCTGCGGGCCGTGGAGCGGGGGCCCCGCGGCTGCGGCTGGATCCGCGAGTTC  
CTGCAGGCGCTGGAGCACGGCGGCTGCAGCCTGGCCGCCTGCTACGCCAACCCAGCCT  
GAGCCAGCTGCCCTCGCCGGCAGAGGAGGCCGAGCACGACCTCTGCGTGCACCTGGTGC  
AGCTGCTCCACGGCACGCTGGTGGACAGGATGCGGACCGTGACGGTGGCCGAGAAGTGC  
CTGGAGATGGGCATCTTCCGGGACGAGGACATGGATCAGATCCAGACTGTTGCTGACAAT  
CGTGGGAACAGAGATGGTGCAGAGGAGCTACTGAGCAGAATAGTGCAGAAGAAAGATTG  
GTTCTCTTCTTTTTTATTGCTCTCCGTGAACTCAACATGAAGACCTTGACAGATGATTTAA  
GCGGAAATACAGGAGGAACAGAGAATAAACAATAATGGGATGGAGAAGAGTACAAACAAAG  
AAGCAGAAGTTACAAGCCAACCAGGATACATCACAGCAGAGAATTTGAAACAGGAAGAAAA  
TGTGGATGATAGTTTCAGCAGTGAGAACAGTGTATTGAAACATCCACAGAAAAGAATTCT  
GTGGTGTGAGAGTCAGATGTCTCATAGGAGATGGAAGTGTGAGTAAGTTGAATGAAAACC  
TGGGACAGAGCTGCACAACCAAGTGAATTCAGATGAAGGGGAG-----

AGGAGAGCCTCACCTGAGCCAGATCTGACCCTGAGAGATTATCAGATGGAAGTTGCAAAG  
CCAGCACTGAATGGGGAGAATGTTATAATATGTCTCCCTACAGGCAGTGGTAAAACCAGAG  
TGGCTGTTTACATTACCAAAGATCACTTGGATAAGAAGAGAAGAGCATCAGAGCCTGGA  
AGTCATAGTACTTGTTAATAAGGTGCCATTGGTAGAACAGCATTTACAAACAGAGTTTAGTC  
CATTCCTGAAGCGTTGGTATCAGGTTATTGGTTTAAAGTGGTGAATCTCAGCTGAAAATCTCA  
TTTCCTGAAGTTGTCAGAAGAAATGATGTCATCATCAGTACAGCACAGATCCTTGAGAATTC  
ACTGTTAAATGCATCCAAGGAAGATGAAGAAGGTGTCCACTTATCAGATTTTCCCTCATCA  
TTATCGATGAGTGTATCACTCAAAAGGAAGGTGTCTACAACAATATAATGCGACGTTAC  
TTAAAAGAAAAGATGAAGAACAGGAAGCTGGCAAAAGAAAACAACACAGATCCACAGC  
CTCAGATTCTGGGACTGACAGCCTCACCTGGTGTAGGAGGTGCAACATCCTACTCAAAAG

CTGAGGAGCATATTCTGAAAATCTGTGCCAATCTTGATGCATGTAGAATTATGACTGTTGAA  
GAGCATGTCTCCCAGCTAAAAAATCAGGTAAAGGAACCGTCTAAGAAGACTGTGATTGCAG  
ATGACAAAAAAGGGATCCATTTAAAGAGAGAATTACTGAGATCATGACAGAAATACAAAT  
TATTGCCAGTTGCATCCAAAATCTGAGTTTGGAACCTCAGACATATGAACAGTGGGTGATCA  
GAGAAGAGAAAAAGAGCTGCAAAAGAAGAAAAACGCAGGGAACGTGTCTGTGCAGAACACT  
TGAAGAAATACAATGATGCTCTCCAGATAAATGACACCATCCGAATGGTGGATGCCTACAA  
TCACCTAAATAACTTTTTATAAAGAGAGAGAAAAAGTAAGAAAACAGTAAGGAGTGATGATGATG  
ATGAACCAGCAGTATCAAAACAGGATGAAACAGATGAATTTCTAATAGGTTTATTTTCATGCA  
AAAAAGAAACAGCTGAAAGAGTTGACGGGAAAGCCAGAAAATGAAAATGAGAAGCTAATAA  
AGTTGAGAAATACTTTAATGGAGGAGTTCACAAAGACTGAGGAACCTCGAGGAATTATTTTC  
ACAAAGACTCGTCTAAGTGCCTTTGCTCTATTCCAGTGGAATTAAGGACAACCCGAAATTTGA  
AGAAGTGGGAATTAGGGCCCATTATCTTATCGGCTCTGGACATAACAGTGAGATGAAGCCC  
ATGACTCAGAATGAGCAAAGGGAAGTTATTGATAAATTTTCGACGTGGAAATGTAAATTTACT  
AATTGCTACTACCGTAGCTGAGGAAGGCCTGGACATCAAAGAGTGTAACATTGTTATTCGC  
TATGGCCTTGTCACCAATGAAATTGCTATGCTGCAGGCTCGTGGTCGAGCTCGAGCTGATG  
AAAGCACCTATGCTCTTGTGGCTTCAAGTGGCTCAGGGGCTGTTGAACGTGAAGATGTTAA  
TATTTTTCGTGAGAAAATGATGTATAAGGCCATTACGCGTGTCCAGAAGATGCCACAGGAA  
GAGTATTTAAACAAGATTCAGAGCTTCCAGTTGCAAAGTATAGTGGAAAAGCAAATGAAGG  
CAAAGAGAGATCAGCGCAAGACATACAAGAAAAATCCTTCACTAATAAAATTCTTATGCAAA  
ACTTGCTACAAGCCGGTATGTTCTGGAGAAGACATACAAGTTATTGAAGACATGCATCATG  
TCAGTGTGAGAAAAGATTTCCAAAGTCTTTATCAAACAAGAGAAAATAAACTCTGCAAGAT  
AAGCGTGCTGATTACCAGACCAATGGGGAAATTATATGTAAACATTGTGGACAAGCTTGGG  
GAAATATGATGGTACACCGAGGTCTTGACCTGCCTTGTCTAAAGATTAGAAATTTTGTGGTT  
GTGTTTGCAGACAAGAAAACAACAAAGCAAATTTTAAAGAAATGGGGAGAACTGCCCATCA  
GGTTTCCTGGTTTTGATTATGCAGCTCATTGTCCTTCAAGTGATGAAGAT

>diphylloides\_magnificus-passeriformes-mda5

ATGGCAGACAGCACCCGGGACGAGCTGTTCTGTACATCATCTCCTGCTTCAGGCCGCGG  
CTGAGGCAGTGGATCCAGGTGCAGCCCGTGCTGGACCGGCTCCCCTCGCTGAGCGCGGA  
GGACAGGGAGAGGGTGCGTGCGGCCGCCCTGCAGCGGGGCCAGGCGGCGGGGGCGGA  
GGAGCTGCTGCGGGCCGTGGAGCGGGGGCCCCGCGGCTGCGGCTGGATCCGCGAGTTC  
CTGCAGGCGCTGGAGCACGGCGGCTGCAGCCTGGCCGCCTGCTACGCCAACCCAGCCT  
GAGCCAGCTGCCCTCGCCGGCAGAGGAGGCCGAGCACGACCTCTGCGTGCACCTGGTGC  
AGCTGCTCCACGGCACGCTGGTGGACAGGATGCGGACCGTGACGGTGGCCGAGAAGTGC  
CTGGAGATGGGCATCTTCCGGGACGAGGACATGGATCAGATCCAGACTGTTGCTGACAAT  
CGTGGGAACAGAGATGGTGCAGAGGGAGCTACTGAGCAGAATAGTGCAGAAGAAAGATTG  
GTTCTCTTCTTTTTTATTGCTCTCCGTGAACTCAACATGAAGACCTTGCAGATGATTTAA  
GCGGAAATACAGGAGGAACAGAGAATAAACAAAATGGGATGGAGAAGAGTACAAACAAAG  
AAGCAGAAATTACAAGCCAACCAGGATACATCACAGCGGAGAATTTGAAACAGGAAGAAAA  
TGTGGATGATAGTTTCAGCAGTGAGAACAGTGTATTGGAAACATCCACAGAAAAGAATTCT  
GTGGTGTGAGATCAGATGTCTCCATAGGAGATGGAAGTGTGAGTAAGTGAATGAAAACC  
TGGGACAGAGCTGCACAACCAAGTGATTCAGATGAAGGGGAG-----  
AGGAGAGCCTCACCTGAGCCAGATCTGACCCTGAGAGATTACCAGATGGAAGTTGCAAAG  
CCAGCACTGAATGGGGAGAATGTTATAATATGTCTCCCTACAGGCAGTGGTAAACAGAG  
TGGCTGTTTACATTACCAAAGATCACTTGGATAAGAAGAGAAGAGCATCAGAGCCTGGAAA

AGTCATAGTACTTGTTAATAAGGTGCCATTGGTAGAACAGCATTTACAAACAGAGTTTAGTC  
CATTCTGAAGCGTTGGTATCAGGTTATTGGTTTAAGTGGTGATTCTCAGCTGAAAATCTCA  
TTTCCTGAAGTTGTCAGAAGAAATGATGTCATCATCAGTACAGCACAGATCCTTGAGAATTC  
ACTGTTAAATGCATCCAAGGAAGATGAAGAAGGTGTCCACTTATCAGATTTTTCCCTCATCA  
TTATTGATGAGTGTATCACACTCAAAAGGAAGGTGTCTACAACAATATAATGCGACGTTAC  
TTAAAAGAAAAGATGAAGAACAGGAAGCTGGCGAAAAGAAAACAAACCACAGATCCCACAGC  
CTCAGATTCTGGGACTGACAGCCTCACCTGGTGTAGGAGGTGCAACATCCTACTCAAAAG  
CTGAGGAGCATATTCTGAAAATCTGTGCCAATCTTGATGCATGTAGAATTATGACTGTTGAA  
GAGCATGTCTCCCAGCTAAAAAATCAGGTAAAGGAACCGTCTAAGAAGACTGTGATTGCAG  
ATGACAAAAAAGGGATCCATTTAAAGAGAGAATTACTGAGATCATGACAGAAATACAAAAT  
TATTGCCAGTTGCATCCAAAATCTGAGTTTGGAACCTCAGACATATGAACAGTGGGTGATCA  
GAGAAGAGAAAAGAGCTGCAAAAAGAAAAACGCGAGGGAACGTGTCTGTGCAGAACACT  
TGAAGAAATACAATGATGCTCTCCAGATAAATGACACCATCCGAATGGTGGATGCCTACAA  
TCACCTAAATAACTTTTTATAAAGAGGAGAAAAAGTAAGAAGACAGTAAGGAGTGATGATG  
ATGAACCAGCAGTATCAAAACAGGATGAAACAGATGAATTTCTAATAGGTTTATTTTCATGCA  
AAAAAGAAACAGCTGAAAGAGTTGACGGGAAAGCCAGAAAATGAAAATGAGAAGCTAATAA  
AGTTGAGAAATACTTTAATGGAGGAGTTCACAAAGACTGAGGAACCTCGAGGAATTATTTTC  
ACAAAGACTCGTCTAAGTGCCTTTGCTCTATTCCAGTGGATTAAGGACAACCCGAAATTTGA  
AGAAGTGGGAATTAGGGCCCATTTATCTTATCGGCTCTGGACATAACAGTGAGATGAAGCCC  
ATGACTCAGAATGAGCAAAGGGAAGTTATTGATAAATTTTCGACGTGGAAATGTAAATTTACT  
AATTGCTACTACCGTAGCTGAGGAAGGCCTGGACATCAAAGAGTGTAACATTGTTATTCGC  
TATGGCCTTGTACCAATGAAATTGCTATGCTGCAGGCTCGTGGTCGAGCTCGAGCTGATG  
AAAGCACCTATGCTCTTGTGGCTTCAAGTGGCTCAGGGGCTGTTGAACGTGAAGATGTTAA  
TATTTTTCGTGAGAAAATGATGTATAAGGCCATTACAGCGTGTCCAGAAGATGCCACAGGAA  
GAGTATTTAAACAAGATTCAGAGCTTCCAGTTGCAAAGTATAGTGGAAAAGCAAATGAAGG  
CAAAGAGAGATCAGCGCAAGACATACAAGAAAAATCCTTCACTAATAAAATTTCTTATGCAAA  
ACTTGCTACAAGCCGGTATGTTCTGGAGAAGACATACAAGTTATTGAAGACATGCATCATG  
TCAGTGTGAGAAAAGATTTCCAAAGTCTTTATCAAACAAGAGAAAATAAACTCTGCAAGAT  
AAGCGTGCTGATTACCAGACCAATGGGGAAATTATATGTAAACATTGTGGACAAGCTTGGG  
GAAATATGATGGTACACCGAGGTCTTGACCTGCCTTGTCTAAAGATTAGAAATTTTGTGGTT  
GTGTTTGCAGACAAGAAAACAACAAAGCAAATTTTTAAGAAATGGGGAGAACTGCCCATCA  
GGTTTCCTGGTTTTGATTATGCAGCTCATTGTCCTTCAAGTGATGAAGAT

>catharus\_ustulatus-passeriformes-mda5

ATGGCAGACAGCACCCGGGACGAGCTGTTCTCTACATGATCTCCTGCTTCAGGCCGCGG  
CTGAAGCAGTTCATCCAGGTGCAGCCCGTGCTGGACCGGCTGCCGTCGCTGAGCGCGGA  
GGACAGGGACAGGGTGCGAGCGGCCGCGGTGCAGCGGGGCGAGGCGGAGGGCGCCGA  
GGAGCTGCTGCGGGCCGTGGAGCGGGGGCCCCGCGGCTGCGGCTGGGTCCGCGAGTTC  
CTGCTGGCGCTGGAGCAGGGCGGCTGCGGCCTGGCCGCCTGCTACGCCAGCCCCAGCC  
TGAGCCAGCTGCCCTCGCCGGAGGAGGAGGCCGAGCACGACCTGTGCGTGCAGCTGCTG  
CAGCTGCTGCACGGCACGCTGGTGGACAGGATGCGCGCCGTGCAGGTGGCCCAGAAGTG  
CCTGGAGATGGGAATCTTCCAGGACGAGGACATGGAACGGATCCAGACTGTAAGTACAA  
TCGTGGGAACAGAGATGGTGCAAGGGAAGTACTGAGCAGAATAGTCCAGAAGAAACATTG  
GTTCTCTTCTTTTTTGGTTGCTCTCCGTGAAACCAACATGAAGACCTTGCATGTGATTAA  
GTGGAAATACAGGA-----

GAGAATAAACAAAATGGGATGGAGCAGACTACAAATGGAGAAACAGAAGTTAGAAGCCAAC  
CAGAATACGCCATACAGGAGAATTTGAAACAGGAAGAAAATGTGGACGATAGTTTCAGCAG  
TGAGAACAGTGTGTTGAAACATCCATAGAAAAGAATTCTGTGCTGTCAGAGTCAGATGTC  
TCCATAGGAGATGGAAGTGTGAGTAACCTGAATGACAACTGGGACAGAGCTACACAACCA  
GTGATTCAGATGGAGAGGAG-----

AGGAGAGCCTCACCTGAGCCAGATCTCACCTGAGAGATTACCAAATGGAAGTTGCAAAA  
CCAGCACTGAATGGGGAGAATATTATAATATGCCTCCCTACGGGCAGTGGTAAACCAGAG  
TGGCTGTTTACATTACCAAAGATCACTTGGATAAGAAGAAAAGAGCATCAGAGCCTGGAAA  
AGTCATAGTACTTGTAAATAAGGTTCCATTGGTAGAACAGCATTTACAAAGAGAGTTTACTC  
CATTCCTGAAGCGTTGGTATAAGGTTACTGGTTTAAGTGGTGATTCTCAACTGAAAATCTCA  
TTTCCTGAAGTTGTCAGAAGAAATGATGTCATCATCAGTACAGCACAGATCCTTGAGAATTC  
ACTGTAAATGCATCCAAGGAAGAGGAAGACAGTGTCCACTTATCAGATTTTTCCCTCATCA  
TTATCGATGAGTGTGTCATCACTCAAAAGGAAGGTGTCTACAACAATATAATGCGACGTTAC  
TTAAAAGAGAAGATGAAGAACAGGAAGCTGGCAAAAGAAAACAAACCACTGATCCCACAGC  
CTCAGATTCTGGGACTTACAGCCTCACCTGGTGTAGGAGGTGCAACGTCCTACTCAAAAGC  
TGAAGAACATATTCTGAAAATCTGTGCCAATCTTGATGCATGTAGAATTATGACTGTTGAAG  
AGCATGCCTCCCAGCTAAAGAATCAGGTGAAGGAACCGTCTAAGAAGACTGTGATTGCAG  
ATGACAAAAAAGGGATCCATTTAAAGAGAAAATTACTGAGATCATGACAGAAATACAAAAC  
TATTGCCAGCTGCATCCAACTGTGAGTTTGGAACTCAGACATATGAACAGTGGGTGATCA  
GAGAAGAGAGAAGAGCTGCAAAAGAAGAAAACGCGAGGGAACGTGTCTGTGCAGAACT  
TGAAGAAGTACAACGATGCTCTCCAGATAAATGACACCATCCGAATGGTGGATGCCTACAA  
TCACCTAAATAACTTTTATAAAGAGGAGAAAAGTAGGAAGACAGTAAGGAGTGATGAGGAG  
GAGGAACCAGCAGTATCAAAACAGGATGAAACAGATGAATTTCTATTAGATTTATTTTCATGC  
AAAAAAGAAACAACTGAAAGAGTTGACTGGAAAACCAGAAAATGAAAATGAGAAGCTAATA  
AAGTTGAGAAATACTTTAATGGAGGAGTTCACGAAGACTGAAGAACCTCGAGGAATCATTT  
TCACAAAGACTCGTTTAAGTGCCTCTGCTCTATACCATTGGATTAAGGACAACCCAAAATTT  
GAAGAAGTGGGAATTAGGGCCCATTATCTTATTGGCTCTGGACATAAGAGTGAAATGAAGC  
CCATGACTCAGAACGAGCAAAGGGAAGTTATTGATAAATTTGACATGGAAATATAAATTTA  
CTAATTGCTACTACTGTAGCTGAAGAAGGCCTGGACATCAAAGAGTGTAACATTGTTATTG  
CTATGGCCTCGTCACCAATGAAATTGCTATGGTGCAGGCTCGCGGTAGAGCTCGATCTGAT  
GAAAGCACCTATGCTCTTGTGGCTTCAAGTGGCTCAGGGGCTGTTGAACGTGAAGATGTTA  
ATATTTTTCGTGAGAAAATGATGTATAAGGCCATTCAGCGAGTCCAGAAGATGCCACAGGA  
AGAGTATTTAAATAAGATTCAGAGTTTCCAGTTGCAAAGTATAGTGGAACAAATGAAGG  
CAAAGAGAGATCAGTGCAAGACATACAAGAAAAATCCTTCACTAATAAAATTTCTATGCAAA  
AATTGCTCCAAGCCGATATGTTCTGGAGAAGACATACAAGTTATTGAAGACATGCATCATAT  
CAGTGTGAAAAAAGATTTCCAAAGTCTTTATCATACAAGAGAAAAATAAAACACTGCAAGATA  
AGAATGCTGATTACCAGACAAATGGGGAAATTATATGCAAAGACTGTGGACAAGCTTGGGG  
AAATATGATGGTTCACCGAGGTCTTGACCTGCCTTGTCTAAAGATTAGAAATTTTGTGGTTG  
TGTTTGCAGACAAGAAAACAACAAAGCACGTTTTTAAAAAGTGGGGAGAGCTGCCCATCAA  
GTTTCCTAGTTTTGATTATGCAGCTCATTGTCCTTCGAGTGATGAAGAT

>ficedula\_albicollis-passeriformes-mda5

ATGGCAGAGGGCACCCGGGACGAGCGGTTCTCTACATGATCTCGTGCTTCAGGCCGCG  
GCTGAAGCAGTTCATCCAGGTGCAGCCCGTGCTGGACCGGCTGCCCTCGCTGAGCGCCG  
AGGACAGGGACAGGGTGCGGGCGGCCGCCGAGCAGCGCGGCGCGGGCGGGCGCGG

AGGAGCTGCTGCGGGCCCTGGAGCGCGGGCCCCGCGGCGCGGCGCGCCCCGCGAGTT  
CCTGCAGGCGCTGGAGCAGGGCGGCTGCGGCCTGGCCGCCTGCTACGCCAACCCCAGC  
CTGAGCCTGCTGCCCTCGCCGGCCCCAGGAGGCCGAGCACGACCTGTGCGTGACAGCTGGT  
GCAGCTCCTGCACGGCACGCTGGTGGACAGGATGCGCGCCCTGCAGGTGGCCGGGAAG  
TGCCTGGAGATGGGAATCTTCCAGGACGAGGACATGGATCGGATCCAGACTGTTACTGAC  
AATCGTGGCAACAGAGATGGTGC AAGGGAGCTACTGAGCAGAATAGTCCAGAAGAAAGAT  
TGGTTCTCTTCTTTTTTGGTTGCTCTCCGTGAAACCCAACATGAAGACCTCGCATGTGATTT  
AAGTGGAAATACAGGAGGAACAGAGAATAAACAAAATGGGATGGAGCAGACTACAGATGA  
AGAAACAGAAGTTACAAGTCAACCAGGATATGTCATAGAGCAGAATTTGAAACAGGAAGAA  
AATGTGGATGATAGTTTCAGCAGTGAGAGCAGTGTGTTGGAACATCCATAGAAAAGAATT  
CTGTGGTGTGAGAGTCAGATGTCTCCGTAGGCGATGGAAGTGTCAAGTAATTGAATGAAAG  
CCTGGGACAGAGCTACACAACCAGTGATTCAGATGAAGAGGAG-----  
AGGAGAGCCTCACCTGAGCCAGATCTGACCCTGAGAGATTACCAGATGGAAGTTGCAAAG  
CCAGCACTGAATGGAGAGAATATTATAATATGTCTCCCTACGGGCAGTGGTAAACTAGAG  
TGGCTGTTTACATTACCAAAGATCACTTGGATAAGAAGAAAAGAGCATCAGAGCCTGGAAA  
AGTCATAGTACTTGTTAATAAGGTTCCATTGGTAGAACAGCATTACAAAGAGAGTTTAGTC  
CATTCCTGAAGCGTTGGTATCAGGTTACTGGTTAAGTGGTGATTCTCAGCTGAAAATCTCA  
TTTCCTGAAGTTGTGAGAAGAAATGATGTCATCATCAGTACAGCTCAGATCCTTGAGAATTC  
ACTGTTAAATGCATCCAAGGAAGAGGAAGAAAGTGTCCACTTATCAGATTTTTCCCTCATCA  
TTATTGATGAATGTCATCACA CTCAAAGGAAGGTGTCTATAACAATATAATGCGACGTTAC  
TTAAAAGAAAAGATGAAGAACAGGAAGCTGGCAAAAAGAAAACAAACCACTGATTCCACAGC  
CTCAGATTCTGGGACTTACAGCCTCACCTGGTGTAGGAGGTGCAACATCCTACTCAAAGC  
TGAAGAGCATATTCTGAAAATCTGTGCCAATCTTGATGCATGTAGAATTATGACTGTTGAAG  
AGCATGCCCCCAGCTAAAGAATCAGGTGAAGGAACCATCTAAGAAGACTGTGATTGCAG  
ATGACAAAAAAGGGATCCATTTAAAGAGAGAAATTATTGACATCATGACAGAAATACAAAAC  
TATTGCCAGCTACATCCAAAGTCTGAGTTTGGAACTCAGACATACGAACAGTGGGTGATGA  
GAGAAGAGAGAAGAGCTGCAAAAGAAGAAAAACGCAGGGAACGTGTCTGTGCGGAACACT  
TGAAGAAATACAATGATGCTCTCCAGATAAATGACACCATCCGAATGGTGGATGCCTACAA  
TCACCTAAATAACTTTTATAAAGAGAGAGAAAAGTAAGAAGACAGTAAGGAGTGATGATGATG  
ATGAACCAGCAGTGTCAAAACAGGATGAAACAGATGAATTTCTATTAGATTTATTTTCATGCA  
AGAAAGAAACAGCTGAAAGAGTTGACTGGAAAGCCAGAAAATGAAAATGAGAAGCTAATAA  
AGTTGAGAAACACTTTAATGGAGGAGTTCACAAAGACTGAGGAACCTCGAGGAATCATTTT  
CACAAAGACTCGTCTAAGTGCCTTTGCTCTATTCCAGTGGATTAAGGACAACCCAAAATTTG  
AAGAAGTGGGAATTAGGGCCATTATCTTATTGGCTCTGGACACAAGAGTGAAATGAAGCC  
CATGACTCAGAATGAGCAAAGGGAAGTTATTGATAAATTTGACATGGAAATATAAATTTAC  
TAATTGCTACTACTGTAGCTGAGGAAGGCCTGGACATCAAAGAGTGTAACATCGTTATTCTG  
CTATGGCCTCGTCACCAATGAAATTGCTATGGTGCAGGCTCGCGGTAGAGCTCGGTCTGA  
TGAAAGTACCTATGCTCTTGTGGCTTCAAGGGGCTCAGGGGCTGTTGAACGTGAAGATGTT  
AATATTTATCGTGAGAAAATGATGTACAAGGCCATTGAGCGTGTCCAGAAGATGCCACAGG  
AAGAGTATTTAAATAAGATTCAGAGTTTCCAGTTGCAAAGTATAGTGGAAAAACAAATGAAG  
ACAAAGAGAGATCAGTGCAAGACATACAAGAAAAATCCTTCACTAATAAAATTTCTTATGCAA  
AAATTGCTACAAGCCGATATGTTCTGGAGAAGACATACAAGTTATTGAAGACATGCATCATA  
TCAGTGTGAAAAAAGATTTCCAAACTCTTTATCATACAAGAGAAAAATAAACGCTGCAAGAT  
AAGCATGCTGATTACCAGACAAATGGGGAAATTATATGCAAAGACTGTGGACAAGCTTGGG



GAAATATGATGATTCACCGAGGTCTTGACCTGCCTTGTCTAAAGATTAAAAATTTTGTGGTT  
GTGTTTGCAGACAAGAAAACAACAAAGCAAATTTTAAAGAAATGGGGGGAGCTGCCCATCA  
GGTTTCCTAGTTTTGATTATGCAGCTCATTTTCCTTCAAGTGATGAAGAT

>saxicola\_maurus-passeriformes-mda5

ATGGCAGAGGGCACCCGGGACGAGCGGTTCTCTACATGATCTCGTGCTTCAGGCCGCG  
GCTGAAGCAGTTCATCCAGGTGCAGCCCGTGCTGGACCGGCTGCCCTCGCTGAGCGCCG  
AGGACCGGGACAGGGTGCGGGCGGCCGCCGAGCAGCGCGGCGCGGGCGGGCGCGG  
AGGAGCTGCTGCGGGCCCTGGAGCGCGGGCCCCGCGGCTGCGGCTGGGGCCGCGAGTT  
CCTGCAGGCGCTGGAGCAGGGCGGCTGCGGCCTGGCCGCCTGCTACGCCAACCCACAGC  
CTGAGCCTGCTGCCCTCGCCCGCCGAGGAGGCCGAGCACGACCTGTGCGTGACAGCTGGT  
GCAGCTGCTGCACGGCACGCTGGTGGACAGGATGCGCGCCCTGCAGGTGGCCGGGAAG  
TGCCTGGAGATGGGAATCTTCCAGGACGAGGACATGGATCGGATCCAGACTGTTACTGAC  
AATCGTGGCAACAGAGATGGTGAAGGGAGCTACTGAGCAGAATAGTCCAGAAGAAAAAT  
TGGTTCTCTCTTTTTTGGTTGCTCTCCGTGAAACCCAACATGAAGACCTCGCATGTGATTT  
AAGTGGAAATACAGGAGGAACAGAGAATAAACAAAAATGGGATGGAGCAGACTACANATGA  
AGAAACAGAAGTTACAAGTCAACCAGGATATGCCATAGAGCAGAATTTGAAACAGAAAGAA  
AATGTGGATGATAGTTTCAGCAGTGAGAGCAGTGTGTTGGAACATCCATAGAAAATAATT  
CTGTGGTGTGACAGTACAGATGTCTNCACAGGAGATGGAAGT-----

AACTTGAATGAAAGCCTGGGACAGAGCTACACAACCAAGTGATTCAGATGAAGAGGAG-----  
AGGAGAGCCTCACCTGAGCCAGATCTGACCCTGAGAGATTACCAGATGGAAGTTGCAAAG  
CCAGCACTGAATGGAGAGAATATTATAATATGTCTCCCTACGGGCAGTGGTAAACTAGAG  
TGGCTGTTTACATTACCAAAGATCACTTGGATAAGAAGAAAAGAGCATCAGAGCCTGGAAA  
AGTCATAGTACTTGTAAATAAGGTTCCATTGGTAGAACAGCATTTACAAAGAGAGTTTAGTC  
CATTCCTGAAGCGTTGGTATCAGGTTACTGGTTAAAGTGGTGATTCTCAGCTGAAAATCTCA  
TTTCCTGAAGTTGTCAGAAGAAATGATGTCATCATCTGTACAGCACAGATCCTTGAGAATTC  
ACTGTTAAATGCATCCAAGGAAGAGGAAGAAAGTGTCCACTTATCAGATTTTTCCCTCATCA  
TTATCGATGAGTGTATCACACTCAAAAGGAAGGTGTCTACAACAATATAATGCGACGTTAC  
TTAAAAGAAAAGATGAAGAACAGGAAGCTGGCAAAAAGAAAACAAACCACTGATCCACAGC  
CTCAGATTCTGGGACTTACAGCCTCACCTGGTGTAGGAGGTGCAACATCCTACTCAAAAGC  
TGAAGAGCATATTCTGAAAATCTGTGCCAATCTTGATGCATGTAGAATTATGACTGTTGAAG  
AGCATGCATCCCAGCTAAAGAATCAGGTGAAGGAACCATCTAAAAAGACTGTGATTGCAGA  
TGACAAAAAAGGGATCCATTTAAAGAGAGAATTATTGAGATCATGACAGAAATACAAAAC  
ATTGCCAGCTACATCCAAAGTCTGAGTTTGGAACCTCAGACATACGAACAGTGGGCGATCAG  
AGAAGAGAGAAGAGCTGCAAAAGAAAGAAAACGCAGGGAACGTGTCTGTGCAGAACACTT  
GAAGAAATACAATGATGCTCTCCAGATAAATGACACCATCCGAATGGTGGATGCCTACAAT  
CACCTAAATAACTTTTATAAAGAGGAGAAAAGTAAGAAGACAGTAAGGAGTGATGATGATG  
ATGAACCAGCAGTATCAAAACAGGATGAAACAGATGAATTTCTATTAGATTTATTTTCATGCA  
AGAAAGAAACAGCTGAAAGAGTTGACTAGAAAGCCAGAAAATGAAAATGAGAAGCTAATAA  
AGTTGAGAAACACTTTAATGGAGGAGTTCACAAANACTGAGGAACCTCGAGGAATCATTTT  
CACAAAGACTCGTCTAAGTGCCCTTTGCTCTATTCCAGTGGATTGAGGACAACCCAAAATTTG  
AAGAAGTGGGAATTAGGGCCCATTTATCTTATTGGCTCTGGACACAAGAGTGAAATGAAGCC  
CATGACTCAGAATGAGCAAAGGGAAGTTATTGATAAATTTGACATGGAAATATAAATTTAC  
TAATTGCTACTACTGTAGCTGAGGAAGGCCTGGACATCAAAGAGTGCAACATAGTTATTTCG  
CTATGGCCTCGTCACCAATGAAATTGCTATGGTGCAGGCTCGCGGTAGAGCTCGGTCTGA

TGAAAGTACCTATGCTCTTGTGGCTTCAAGTGGCTCAGGGGCTGTTGAACGTGAAGATGTT  
AATATTTATCGTGAGAAAATGATGTACAAGGCCATCCAGCGTGTCCAGAAGATGCCACAGG  
AAGAGTATTTAAATAAGATTCAGAGTTTCCAGTTGCAAAGTATAGTGGAAAAACAAATGAAG  
GCAAAGAGAGATCAGTGCAAGACATACAAGAAAAATCCTTCACTAATAAAATTCTTATGCAA  
AAATTGCTACAAGCCGATATGTTCTGGAGAAGACATACAAGTTATTGAAGACATGCATCATA  
TCAGTGTGAAAAAAGATTTCCAAAGTCTTTATCATACAAGAGAAAAATAAAACACTGCAAGAT  
AAGCATGCTGATTACCAGACAAATGGGGAAATTATATGCAAAGACTGTGGACAAGCTTGGG  
GAAATATGATGATTCACCGAGGTCTTGACCTGCCTTGTCTAAAGATTAAAAATTTTGTGGTT  
GTGTTTGCAGACAAGAAAAACAACAAAGCAAATTTTAAAGAAATGGGGAGAGCTGCCCCATCA  
GGTTTCCTAGTTTTGATTATGCAGCTCATTTTCCTTCAAGTGATGAAGAT

>lamprotornis\_superbus-passeriformes-mda5

ATGGCAGAGGGGCACCCGGGACGAGCTGTTCTCTACATGATCTCCTGCTTCAGGCCGCGG  
CTGAAGCGGTTCCATCCAGGTGCAGCCCGTGCTGGACCGGCTGCCGGCGCTGAGCGCGGA  
CGACAGGGACAGGGTGCGAGCGGCCGCCAGCAGCGGGGCGCGGCGGGCGGGCGCCGA  
GGAGCTGCTGCGGGCCGTGGAGCGGGGGCCCCGCGGCTGCGGCTGGATCCGCGAGTTC  
CTGCAGGCCCTGGAGCAGGGCGGCTGCGGCCTGGCCGCTGCTACGCCAACCCAGCC  
TGAGCCAGCTGCCCTCGCCGGCAGAGGAGGCCGAGCACGACCTGTGCGTGCAGCTGGTG  
CAGCTGCTGCACGGCACGCTGGTGGACAGGATGCGCGCCGTGCCGGTGGCCGAGAAGT  
GCCTGGAGATGGGAATCTTCCAGGACGAGGACATGGATCGGATCCAGACTGTTACTGACA  
ATCGTGGGAACAGAGATGGTGCAAGGGAGCTACTGAGCAGAATAGTCCAGAAGAAAGATT  
GGTTCTCTTCTTTCTTGGTTGCTCTCCGTGAAACCCAACATGAAGACCTTGCATATGACTTA  
AGTGGAATAACAGGA-----

GAAAATAAACAAAATGGGATGGAGCAGACTACAAATGAAGAAACAGAAGTTACAAGCCAAC  
CAGGATACGTCACAGAGGAGAATGTGAAACAGGAAGAAAATGTGGATGATAGTTTCAGCA  
GTGAGAACAGTGTGTTGGAAACATCCATAGAAAATAATTCTGTGGCATCAGAGTCAGATGT  
CTCCGTAGGAGATAGAAGCGTCAGTAACCTTGAATGAAAACCTGGGACAGAGCTACACAAC  
CAGTGATTCAGATGAAGAGGAG-----

AGGAGAGCCTCACCTGAGCCAGATCTGACCCTGAGAGATTACCAGATGGAAGTTGCAAAG  
CCAGCACTGAATGGGGAGAATATTATAATATGTCTCCCTACGGGCAGTGGTAAAACCAGAG  
TGGCTGTTTACATTACCAAAGATCACTTGGATAAGAGGAAAAGAGCATCAGAGCCTGGAAA  
AGTCATAGTACTTGTTAATAAGGTTCCATTGGTAGAACAGCATTTACAAAGAGAGTTTAGTC  
CATTCCTGAAGCGTTGGTATCAGGTTACTGGTTTAAAGTGGTGATTCTCAGCTGAAAATCTCA  
TTTCCTGAAGTTGTCAGAAGAAATGATGTCATCATCAGTACAGCACAGATCCTTGAGAATTC  
ACTGTTAAATGCATCCAAGGAAGAGGAAGAAAGTGTCCACTTATCAGATTTTTCCCTCATCA  
TTATCGATGAGTGTATCAGTCACTCAAAAGGAAGGTGTCTACAACAATATAATGCGACGTTAC  
TTAAAAGAAAAGATGAAGAACAGGAACTGGCAAAAGAAAACAAACCACTGATCCCACAGC  
CTCAAATTCTGGGACTTACAGCCTCACCTGGTGTAGGAGGTGCAACATCCTACTCAAAAGC  
TGAAGAGCATATTCTGAAAATCTGTGCCAATCTTGATGCATGTAGAATTATGACTGTTGAAG  
AGCATGCCTCCCAATTGAAGAATCGGGTGAAGGAACCTTCTAAAAAACTGTGATTGCAGA  
TGACAAAAAAGGGATCCATTTAAAGAGAAAATTACTGAGATCATGACAGAAATTCAAAAC  
ATTGCCAGCTGCATCCAAAGTCTGAGTTTGGAACTCAGACATATGAACAGTGGGTGATCAG  
AGAAGAGAGAAGAGCTGCAAAAGAAGAAAAACGCAGGGAACGTGTCTGTGCAGAGCACTT  
GAAGAAATACAATGATGCTCTCCAGATAAATGACACCATCCGAATGGTGGATGCCTACAAT  
CACCTAAATAACTTTTATAAGGAGGAGAAAAAGTAAGAAGACAATAAGGAGTGATGATGATG

ATGAACCAGCAGTATCAAAACAGGATGAAACAGATGAATTTCTAATAGATTTATTTTCATGCA  
AAAAAGAAACAGCTGAAAGAGTTGACAGGAAAGCCAGAATATGAAAATGAGAAATTAATAA  
AGTTGAGAAATACTTTAATGGAGGAATTCACAAAGACTGAGGAACCTCGAGGAATCATTTC  
ACAAAGACTCGTCTAAGTGCCTTTGCTCTATTCCAGTGGATTAAGGACAACCCAAAATTTGA  
AGAAGTGGGAATTAGGGCCCATTTATCTTATTGGCTGTGGACATAAGAGTGAAATGAAGCCC  
ATGACTCAGAATGAGCAAAGGGAAGTTATTGATAAATTTTCGACATGGAAGTATAAATTTACT  
AATTGCTACTACTGTAGCTGAGGAAGGCCTGGACATCAAAGAGTGTAACATCGTTATTTCGC  
TACGGCCTCGTCACCAATGAAATTGCTATGGTGCAGGCTCGTGGTAGAGCTCGATCTGAT  
GAAAGCACCTATGCTCTTGTGGCTTCAAGTGGCTCAGGGGCTGTTGAACGTGAAGATGTG  
AATATTTTTCTGTGAGAAAATGATGTATAAGGCCATTCAGCGTGTCCAGAAGATGCCACAGG  
AAGAGTATTTAAATAAGATTCCAGAGTTTCCAGTTGCAAAGTATAGTGGAAAAACAAATGAAG  
GCAAAGAGAGATCAGTGCAAGACATACAAGAAAAATCCTTCACTGATAAAATTTCTTATGCAA  
AAATTGCTACAAGCCGATATGTTCTGGAGAAGACATACAAGTTATTGAAGACATGCATCATA  
TCAGTGTGAAAAAAGATTTCCAAAGTCTTTATCATAACAAGAGAAAAATAAAACACTGCAAGAT  
AAGCATGCCGATTACCAAACAAATGGGGAAATTATATGCAAAGACTGTGGACAAGCTTGGG  
GAAATATGATGGTTCACCGAGGTCTTGACCTGCCTTGTCTGAAGATTAGAAATTTTGTGGTT  
GTGTTTGCAGACAAGAAAAACAACAAAGCAAATTTTTAAGAAATGGGGAGAGCTGCCCCATCA  
GGTTTCCTAGTTTTGATTATGCAGCTCATTATCCTTCAAGTGATGAAGAT

>acridotheres\_javanicus-passeriformes-md5

ATGGCAGAGGGCACCCGGGACGAGCTGTTCTCTACATGATCTCCTGCTTCAGGCCGCGG  
CTGAAGCGGTTTCATCCAGGTGCAGCCCGTGCTGGACCGGCTGCCGGCGCTGAGCGCGGA  
GGACAGGGACAGGGTGCGAGCGGCCGCCAGCAGCGGGGCGCGGGCGGGCGGCCGA  
GGAGCTGCTGCGGGCCGTGGAGCGGGGGCCCCGCGGCTGCGGCTGGATCCGCGAGTTC  
CTGCAGGCGCTGGAGCAGGGCGGCTGCGGCCTGGCCGCCTGCTACGCCAACCCAGCC  
TGAGCCAGCTGCCCTCGCCGGCAGAGGAGGCCGAGCACGACCTGTGCGTGCAGCTGGTG  
CAGCTGCTGCACGGCACGCTGGTGGACAGGATGCGCGCCGTGCCGGTGGCCGAGAAGT  
GCCTGGAGATGGGAATCTTCCAGGACGAGGACATGGATCGGATCCAGACAGTTACTGACA  
ATCATGGGAACAGAGATGGTGCAAGGGAGCTACTGAGCAGAATAGTCCAGAAGAAAGATT  
GGTTCTCTTCTTTCTTGGTTGCTCTCCGTGAAACCCAACATGAAGACCTTGCATATGATTTA  
AGTGGAATACAGGA-----

GAGAATAAACAAAATGGGATGGAGCAGACTACAAATGAAGAAACAGAAGTTACAAGCCAAC  
CAGGATACGTACAGAGGAGAATTTGAAACAGGAAGAAAATGTGGATGATAGTTTCAGCAG  
TGAGAACAGTGTGTTGAAACATCCATAGAAAACAATTTTGTGGCATCAGAGTCAGATGTC  
TCCGTAGGAGATAGAAGGGTCAATAACTTGGATGAAAACCTGGGACAGAGCTACACAACC  
AGTGATTCAGATGAAGAGGAG-----

AGGAGAGCCTCACCTGAGCCAGATCTGACCCTGAGAGATTACCAGATGGAAGTTGCAAAG  
CCAGCATTGAATGGGGAGAATATTATAATATGTCTCCCTACAGGCAGTGGTAAAACCAGAG  
TGGCTGTTTACATTACCAAAGATCACTTGGATAAGAAGAAAAGAGCATCAGAGCCTGGA  
GGTCATAGTACTTGTTAATAAGGTTCCATTGGTAGAACAGCATTTACAAAGAGAGTTTAGTC  
CATTCCTGAAGCGTTGGTATAAGGTTACTGGTTTAAAGTGGTGATTCTCAGCTGAAAATCTCA  
TTTCTGAAAGTTGTCAGAAGAAATGATGTCATCATCAGTACAGCACAGATCCTTGAGAATTC  
ATTGTTAAATGCATCCAAGGAAGAGGAAGAAAGTGTCCACTTATCAGATTTTCCCTCATYA  
TTATTGATGAGTGTATCACAACCTCAAAGGAAGGTGTCTACAACAATATAATGCGACGCTAC  
TTAAAAGAAAAGATGAAGAACAGGAAGCTGGCAAAAGAAAACAAACCACTGATCCCACAGC

CTCAAATTCTGGGACTTACAGCCTCACCTGGTGTAGGAGGTGCAACATCCTACTCAAAAGC  
TGAAGAGCATATTCTGAAAATCTGTGCCAATCTTGATGCATGTAGAATTATGACTGTTGAAG  
AGCATGCCTCCCAATTGAAGAATCGGGTGAAGGAACCATCTAAAAAACTGTGATTGCAGA  
TGACAAAAAAAGGGATCCATTTAAAGAGAGAATTACTGAGATCATGACAGAAATTCAAAAC  
ATTGCCAGCTACATCCAAAATCTGAGTTTGGAACCTCAGACATATGAACAGTGGGTGATCAG  
AGAAGAGAGAAGAGCTGCAAAAGAAGAAAAACGCAGGGAACGTGTCTGTGCAGAGCACCT  
GAAGAAATACAATGATGCTCTCCAGATAAATGACACCATCCGAATGGTGGATGCCTACAAT  
CACCTAAATAACTTCTATAAGGAGGAGAAAAAGTAAGAAGACAGTAAGGAGTGATGATGATG  
ATGAACCAGCAGTATCAAAACAGGATGAAACAGATGCATTTCTAATAGATTTATTTTCATGCA  
AAAAAGAAACAGCTGAAAGAGTTGACAGGAAAGCCAGAAAATGAAAATGAGAAATTAATAA  
AGTTGAGAAATACTTTAATGGAGGAATTCACGAAGACTGAGGAACCTCGAGGAATCATTTT  
CACAAAGACTCGTCTAAGTGCCCTTTGCTCTATTCCAGTGGATTAAGGACAACCCAAAATTTG  
AAGAAGTGGGAATTAGGGCCCATTATCTGATCGGCTGTGGACATAAGAGTGAAATGAAGC  
CCATGACTCAGAATGAGCAAAGGGAAGTTATTGATAAATTTGACATGGAAGTATAAATTTA  
CTAATTGCTACTACTGTAGCTGAGGAAGGCCTGGACATCAAAGAGTGTAACATCGTTATTC  
GCTACGGCCTCGTCACCAATGAAATTGCCATGGTGCAGGCTCGTGGTAGAGCTCGATCTG  
ATGAAAGCACCTATGCTCTTGTGGCTTCAAGTGGCTCAGGGGCTGTTGAACGTGAAGATGT  
GAATATTTTTTCGTGAGCAAATGATGTATAAGGCCATTACGCGTGTCCAGAAGATGCCACAG  
GAAGAGTATTTAAATAAGATTACAGAGTTTCCAGTTGCAAAGTATAGTGGAAGAAACAAATGAA  
GGCAAAGAGAGATCAGTGCAAGACGTACAAGAAAAATCCTTCACTAATAAAATTCTTATGCA  
AAAATTGCTACAAGCCAATATGTTCTGGAGAAGACATACAAGTTATTGAAGACATGCATCAT  
ATCAGTGTGAAARAAGATTTCCAAAGTCTTTATCATACAAGAGAAAAATAAAACACTGCAAGA  
TAAGAATGCTGATTACCAAACAAATGGGGAAATTATATGCAAAGACTGTGGACAAGCTTGG  
GGAAATATGATGGTTACCGAGGTCTTGACCTGCCTTGTCTGAAGATTAGAAATTTTGTGG  
TTGTGTTTGCAGACAAGAAAAACAACAAAGCACATTTTAAAGAAATGGGGAGAGCTGCCCCAT  
CAGGTTTTCCTAGTTTTGATTATGCAGCTCATTATCCTTCAAGTGATGAAGAT

>sturnus\_vulgaris-passeriformes-mda5

ATGGCAGAGGGCACCCGGGACGAGCTGTTCTCTACATGATCTCCTGCTTCAGGCCGCGG  
CTGAAGCGGTTTCATCCAGGTGCAGCCCGTGCTGGACCGGCTGCCGGCGCTGAGCGCGGA  
GGACAGGGACAGGGTGCGAGCGGCCGCCAGCAGCGGGGCGCGGGCGGGCGGCCGA  
GGAGCTGCTGAGGGCCGTGGAGCGGGGGCCCCGCGGCTGCGGCTGGATCCGCGAGTTC  
CTGCAGGCGCTGGAGCAGGGCGGCTGCGGCCTGGCCGCTTGCTACGCCAACCCAGCCT  
GAGCCAGCTGCCCTCGCCGGCAGAGGAGGCCGAGCACGACCTGTGCGTGCAGCTGGTG  
CAGCTGCTGCACGGCACGCTGGTGGACAGGATGCGCGCCGTGCCGGTGGCCGAGAAGT  
GCCTGGAGATGGGAATCTTCCAGGACGAGGACATGGATCGGATCCAGACAGTTACTGACA  
ATCATGGGAACAGAGATGGTGCAAGGGAGCTACTGAGCAGAATAGTCCAGAAGAAAGATT  
GGTTCTCTTCTTTCTTGGTTGCTCTCCGTGAAACCCAACATGAAGACCTTGCGTATGATTTA  
AGTGGAAATACAGGA-----

GAGAATAAACAAAATGGGATGGAGCAGACTACAAATGAAGAAACAGAAGTTACAAGCCAAC  
CAGGATACGTCACAGAGGAGAATTTGAAACAGGAAGAAAATGTGGATGATAGTTTCCACAG  
TGAGAACAGTGTGTTGAAACATCCATGGAATAAATTCTGTGGCATCAGAGTCAGATGTC  
TCCGTAGGAGATAGAAGGGTCAATAACTTGGATGAAAACCTGGGACAGAGCTACACAACC  
AGTGATTCAGATGAAGAGGAG-----

AGGAGAGCCTCACCTGAGCCAGATCTGACCCTGAGAGATTACCAGATGGAAGTTGCAAAG

CCAGCATTGAATGGGGAGAATATTATAATATGTCTCCCTACAGGCAGTGGTAAAACCAGAG  
TGGCTGTTTACATTACCAAAGATCACTTGGATAAGAAGAAAAGAGCATCAGAGCCTGGAAA  
AGTCATAGTACTTGTTAATAAGGTCCCATTGGTTGAACAGCATTTACAAAGAGAGTTTAGTC  
CATTCCTGAAGCGTTGGTATAAGGTTACTGGTTTAAGTGGTGATTCTCAGCTGAAAATCTCA  
TTTCCTGAAGTTGTCAGAAGAAATGATGTCATCATCAGTACAGCACAGATCCTTGAGAATTC  
ACTGTTAAATGCATCCAAGGAAGAGGAAGAAAAGTGTCCACTTATCAGATTTTTCCCTCATCA  
TTATTGATGAGTGTATCACACTCAAAGGAAGGTGTCTACAACAATATAATGCGACGTTAC  
TTAAAAGAAAAGATGAAGAACAGGAAGCTGGCAAAAAGAAAACAAACCACTGATCCCACAGC  
CTCAAATTCTGGGACTTACAGCCTCACCTGGTGTAGGAGGTGCAACATCCTACTCAAAGC  
TGAAGAGCATATTCTGAAAATTTGTGCCAATCTTGATGCATGTAGAATTATGACTGTTGAAG  
AGCATGCCTCCCAATTGAAGAATCGGGTGAAGGAACCATCTAAAAAACTGTGATTGCAGA  
TGACAAAAAAGGGATCCATTTAAAGAGCGAATTACTGAGATCATGACAGAAATTCAAAAT  
ATTGCCAGCTGCATCCAAAGTCTGAGTTTGGAACTCAGACATATGAACAGTGGGTGATCAG  
AGAAGAGAGAAGAGCTGCAAAAGAAGAAAAACGCAGGGAACGTGTCTGTGCAGAGCACCT  
GAAGAAATACAATGATGCTCTCCAGATAAATGACACCATCCGAATGGTGGATGCCTACAAT  
CACCTAAATAACTTTTATAAGGAGGAGAAAAAGTAAGAAGACAGTAAGGAGTGATGATGATG  
ATGAACCAGCAGTATCAAAACAGGATGAAACAGATGCATTTCTAATAGATTTATTTTCATGCA  
AAAAAGAAACAGCTGAAAGAGTTGACAGGAAAGCCAGAAAATGAAAATGAGAAATTAATAA  
AGTTGAGAAATACTTTAATGGAGGAATTCACGAAGACTGAGGAACCTCGAGGAATCATTTT  
CACAAAGACTCGTCTAAGTGCCCTTTGCTCTATTCCAGTGGATTAAGGACAACCCAAAATTTG  
AAGAAGTGGGAATTAGGGCCCATATCTGATCGGCTGTGGACATAAGAGTGAAATGAAGC  
CCATGACTCAGAATGAGCAAAGGGAAGTTATTGATAAATTTGACATGGAAGTATAAATTTA  
CTAACTGCTACTACTGTAGCTGAGGAAGGCCTGGACATCAAAGAGTGTAACATCGTTATTC  
GCTACGGCCTCGTCACCAATGAAATTGCCATGGTGCAGGCTCGTGGTAGAGCTCGATCTG  
ATGAAAGCACCTATGCTCTTGTGGCTTCAAGTGGCTCAGGGGCTGTTGAACGTGAAGATGT  
GAATATTTTTTCGTGAGCAAATGATGTATAAGGCCATTGAGCGTGTCCAGAAGATGCCACAG  
GAAGAGTATTTAAATAAGATTCAGAGTTTCCAGTTGCAAAGTATAGTGGA AAAACAAATGAA  
GGCAAAGAGAGATCAGTGCAAGACATACAAGAAAAATCCTTCACTAATAAAATTCTTATGCA  
AAAATTGCTACAAGCCAATATGTTCTGGAGAAGACATACAAGTTATTGAAGACATGCATCAT  
ATCAGTGTGAAAGAAGATTTCCAAAGTCTTTATCATACAAGAGAAAATAAAACACTGCAAGA  
TAAGAATGCTGATTACCAAACAAATGGGGAAATTATATGCAAAGACTGTGGACAAGCTTGG  
GGAAATATGATGGTTCACCGAGGTCTTGACCTGCCTTGTCTGAAGATTAGAAATTTTGTGG  
TTGTGTTTGCAGACAAGAAAAACAACAAAGCAAATCTTTAAGAAATGGGGAGAGCTGCCCCAT  
CAGGTTTCCTAGTTTTGATTATGCAGCTCATTATCCTTCAAGTGATGAAGAT

>poecile\_atricapillus-passeriformes-mda5

ATGGCAGAGGGCACCCGGGACGAGCGGTTCTCTACATGATCTCCTGCTTCAGGCCGCG  
GCTGAAGCAGTTCATCCAGGTGCAGCCGGTGTGGACCGGCTCCCTCGCTGAGCGCGG  
AGGACAGGGACCGGGTGCGGGCGGCCGCCCTGCAGCGCGGCGCGGCGGGCGCGG  
AGGAGCTGCTGCGGGCCGTGGAGCGCGGGCCCCGCGGCTGCGGCTGGATCCGCGAGTT  
CCTGCAGGCGCTGGAGCACGGTGGCTGCAGCCTGGCCGCCTGCTACGCCAACCCAGCC  
TGAGCCAGCTGCCCTCGGCGGCAGAGGAGGCCGAGCACGACCTCTGCGTGCAGCTGGTG  
CAGCTGCTGCACGGCACGCTGGTGGACAGGATGCGCACCGTGCAAGTGGCCGCCAGGT  
GCCTGGAGATGGGCATCTTCCAGGAGGAGGACATGGATCGGATCCAGACTGCTACTGATA  
ATCGTGGGAACAGAGATGGTGCAAGGGAGCTACTGAGCAGAATAGTCCAGAAGAAAGATT

GGTTCTCATCTTTTTTGGTTGCTCTCCGTGAAACCCAACATGAGGACCTTGCAGATGATTTA  
AGTGGAATACAGGA-----  
GAGAATAAACAAAATGGGATAGAGCAGACTACAAACGAAGAAACAGAAGTTAGAAGCCAAC  
CAGGATATGACATAGAGGAGAATTTGAAACAGGAAGAAAATGTGGATGATAGTTTCAGCAG  
TGAGAACGGTGTGTTGGAAACATCCATACAAGAGAATTCTGTGGTGTGAGAGTCAGATGTC  
TCCATAGGAGATGGAAGCGTCAGTAACTTAAATGGAAACCTGGGACAGAGCTGCACAGCC  
ACTGATTCAGATGAAGTGGAG-----  
AGGAGAGCCTCACCTCAGCCAGATCTGACCCTGAGAGATTACCAGATGGAAGTTGCAAAG  
CCAGCACTGAATGGGGAGAATATTATAATATGTCTCCCTACGGGCAGTGGTAAAACAGAG  
TGGCTGTTTACATTACCAAAGATCACTTGGATAAGAAGAAAAGGGCATCAGAGCCTGGAAA  
AGTCATAGTACTTGTTAATAAGGTTCCATTGGTAGAACAGCATTTACAAACAGAGTTTAGTC  
CATTCCTGAAGCGCTGGTATCAGGTTATTGGTTAAGTGGTGATTCTCAGCTGAAAATCTCA  
TTTCCTGAAGTTGTCAGAAGAAATGATGTCATCATCAGTACAGCACAGATCCTTGAGAATTC  
ACTGTTAAATGCATCCAAGGAAGATGAAGAATGTGTCCACTTATCAGATTTTTCCCTCATCA  
TTATTGATGAATGTCATCACACTCAAAGGAAGGTGTCTACAACAATATAATGCGACGTTAC  
TTAAAAGAAAAGATGAAGAACAGGAAGCTGGCAAAAAGAAAACAAACCACTGATCCCACAGC  
CTCAGATTCTGGGACTTACAGCCTCACCTGGTGTAGGAGGTGCAACATCCTACTCAAAGC  
TGAAGAGCATATTCTGAAAATCTGTGCCAATCTTGATGCATGTAGAATTATGACTGTTGAAG  
AGCACGCCTCTCAGCTGAAGAATCAGGTGAAGGAACCGTCTAAGAAGACTGTGATTGCAG  
ATGACAAAAGAAGGGATCCATTTAAAGAAAGAATTACTGAGATCATGAGAGAAATACAAAAC  
TATTGCCAGCTGCATCCAAAGTCTGAGTTTGGAACCTCAGACCTATGAACAGTGGGTGATCA  
GAGAAGAGAGAAGAGCTGCAAAAAGAAAAACGCAGGGAACGTGTCTGTGCAGAACT  
TGAAGAAATACAATGATGCTCTCCAGATAAATGACACCATCCGAATGGTGGATGCCTACAA  
TCACCTAGATAACTTTTTATAAAGAGGAGAAAAAGTAAGAAGACAGTAAGGAGTGATGATGAT  
GATGAACCAGCAGTATCAAACAGGATGAAACAGATGAATTTCTAATAGGTTTATTTTCATGC  
AAAAAAGAAACAGCTGAAAGAGTTGACTGGAAAGCCAGAAAATGAAAATGAGAAGCTAATA  
AAGTTGAGAAATACTTTAATGGAGGAGTTCACAAAGACTGAGGAACCTCGAGGAATCATTT  
TCACAAAGACTCGTCTAAGTGCCCTTTGCTCTATTCCAGTGGATTAAGGACAACCCAAAATTT  
GAAGAAGTGGGAATTAGGGGCCATTATCTTATTGGCTCTGGACATAAGAGTGAAATCAAGC  
CCATGACTCAGAATGAGCAAAGGGAAGTTATTGATAAATTTGATGTGGAAATGTAAATTTA  
CTAATTGCTACTACTGTAGCTGAGGAAGGACTGGACATCAAAGAGTGTAACATCGTTATTC  
GCTATGGCCTTGTACCAATGAAATTGCTATGGTGCAGGCTCGTGGTAGAGCTCGAGCTG  
ATGAAAGCACCTATGCTCTTGTGGCTTCAAGTGGCTCAGGGGCTGTTGAACGTGAAGATGT  
TAATATTTTTTCGTGAGAAAATGATGTATAAGGCCATTCAGCGTGTCCAGAAGATGCCACAG  
GAAGAGTATTTAAATAAGATTGAGAGTTTCCAGTTGCAAAGTATAGTGGAACAAATGAA  
GGCAAAGAGAGATCAGCGCAAGACATGCAAGAAAAATCCTTCACTAATAAAATTCTTATGC  
AAAAATTGCAACAAGCTGATATGTTCTGGAGAAGACATACAAGTTATTGAAGACATGCATCA  
TGTCAGTGTGAAAAAAGATTTCCCAAGTCTTTATCATACAAGAGAAAATAAAACACTGCAAG  
ATAAGAATGCCGATTACCAGACAAATGGGGAAATTGTATGCAAAGACTGTGGACAGGCTTG  
GGGAAATATGATGGTTCACCGAGGTCTTGACCTGCCTTGTCTTAAGATTAGAAATTTGTG  
GTTGTGTTTGCAGACAAGAAAACAACAAAGCAAATTTTTAAGAAATGGGGAGAACTGCCCA  
TCAGGTTTCCTAGTTTTGATTATGCAGCTCATTTTCCTTCAAGTGATGAAGAT  
>parus\_major-passeriformes-mda5  
ATGGCAGAGGGCACCCGGGACGAGCGGTTCTCTACATGATCTCCTGCTTCAGGCCGCG

GCTGAAGCAGTTCATCCAGGTGCAGCCCGTGCTGGACCGGCTCCCCTCGCTGAGCGCGG  
AGGACAGGGACAGGGTGCGGGCGGCCGCCCTGCAGCGCGGCGCGGCGGGCGCGG  
AGGAGCTGCTGCGGGCCGTGGAGCGCGGGCCCCGCGGCTGCGGCTGGATCCGCGAGTT  
CCTGCAGGCGCTGGAGCACGGTGGCTGCAGCCTGGCAGCCTGCTACGCCAACCCAGCC  
TGAGCCAGCTGCCATCGGCGGCAGAGGAGGCCGAGCACGACCTCTGCGTGCAGCTGGTG  
CAGCTGCTGCACGGCACGCTGGTGGACAGGATGCGCACCGTGCAGGTGGCCGCCAGGT  
GCCTGGAGATGGGCATCTTCCAAGAGGAGGACATGGATCGGATCCAGACTGCTACTGATA  
ATCGTGGAACAGAGATGGTGCAAGGGAGCTACTGAGCAGAATAGTCCAGAAGAAAGATT  
GGTTCTCTTCTTTTTTGGTTGCTCTCCGTGAAACCCAACATGAGGACCTTGCAGATGATTTA  
AGTGGAATACAGGA-----  
GAGAATAAACAAAATGGGACGGAGCAGACTACAAATGAAGAACTGAAGTTAGAAGCCAAC  
CAGGATATGACATAGAGGAGAATTTGAAACAGGAAGAAAATGTGGATGATAGTTTCAGCAG  
TGAGAACAGTGTGTTGGAACATCCATACAAGAGAATTCTGTGGTGTGAGACTCAGATGTC  
TCCATAGGAGATGGAAGCATCAGTAACTTAAATGAAATCTGGGACAGAGCTTCACAGCCA  
CTGATTCAGATGAAGTGGAG-----  
AGGAGAGCCTCACCTCAGCCAGATCTGACTCTGAGAGATTACCAGATGGAAGTTGCAAAG  
CCAGCACTGAATGGGGAGAATATTATAATATGTCTCCCTACGGGCAGTGGTAAAACCAGAG  
TGGCTGTTTACATTACCAAAGATCACTTGGATAAGAAGAAAAGGGCATCAGAGCCTGGA  
AGTCATAGTACTTGTTAATAAGGTTCCATTGGTAGAACAGCATTTACAAACAGAGTTTAGTC  
CATTCCTGAAGCGCTGGTATCAGGTTATTGGTTTAAGTGGTGAATTCTCAGCTGAAAATCTCA  
TTTCCTGAAGTTGTCAGAAGAAATGATGTCATCATCAGTACAGCACAGATCCTTGAGAATTC  
ACTGTTAAATGCATCCAAAGAAGATGAAGAATATGTCCACTTATCAGATTTTTCTCTCATCAT  
TATTGATGAATGTCATCACTCAAAGGAAGGTGTCTACAACAATATAATGCGACGTTACT  
TAAAAGAAAAGATGAAGAACAGGAAGCTGGCAAAAGAAAACAAACCACTGATCCCACAGCC  
TCAGATTCTGGGACTTACAGCCTCTCCTGGTGTAGGAGGTGCAACATCCTACTCAAAGCT  
GAAGAGCATATTCTGAAAATCTGTGCCAATCTTGATGCTTGTAAGATTATGACTGTTGAAGA  
GCATGCCTCCCAGCTGAAGAATCAGGTGAAGGAACCAACTAAGAAGACTGTGATTGCAGA  
TGACAAAAAAGGGATCCATTTAAAGAGAGAATTACTGAGATCATGACAGAAATACAAAAT  
ATTGCCAGCTGCATCCAAAGTCTGAGTTTGGAACTCAGACGTATGAACAGTGGGTGATCAG  
AGAAGAGAGAAGAGCTGCAAAAGAAGAAAAACGCAGGGAACGTGTCTGTGCAGAACACTT  
GAAGAAATACAATGATGCTCTCCAGATAAATGACACCATCCGAATGGTGGATGCCTACAAT  
CACCTAGATAACTTTTTATAAAGAGGAGAAAAAGTAAGAAGACAGTAAGGAGTGATGATGATG  
ATGAACCAGCAGTATCAAACAGGATGAAACAGATGAATTTCTAATAGGTTTATTTTCATGCA  
AAAAAGAAACAGCTGAAAGAGTTGACTGGAATCCAGAAAAATGAAAATGAGAAGCTAATAA  
AGTTGAGAAATACTTTAATGGAGGAGTTCACAAAGACTGAGGAACCTCGAGGAATCATTTT  
CACAAAGACTCGTCTAAGTGCCTTTGCTCTATTCCAGTGGATTAAGGACAACCCAAAATTTG  
AAGAAGTGGGAATTAGGGCCATTATCTTATCGGCTCTGGACATAAGAGTGAAATCAAGCC  
CATGACTCAGAATGAGCAAAGGGAAGTTATTGATAAATTTGATGTGGAAATGTAAATTTAC  
TAATTGCTACTACTGTAGCTGAGGAAGGACTGGACATCAAAGAGTGTAACATCGTTATTG  
CTATGGCCTTGTACCAATGAAATTGCTATGGTGCAGGCTCGTGGTAGAGCTCGAGCTGAT  
GAAAGCACTTATGCTCTTGTGGCTTCCAGTGGCTCAGGGGCTGTTGAACGTGAAGATGTTA  
ATATTTTTCGTGAGAAAATGATGTATAAGGCCATTCAGCGTGTCCAGAAGATGCCACAGGA  
AGAGTATTTAAATAAGATTCACAGTTTCCAGTTGCAAAGTATAGTGAAAAACAAATGAAGG  
CAAAGAGAGATCAGCGCAAGACATGCAAGAAAAATCCTTCACTAATAAAATTCTTATGCAAA

AATTGCAACAAGCTGATATGTTCTGGAGAAGACATACAAGTTATTGAAGAAATGCATCATGT  
CAGTGTGAAAAAAGATTTCCCTAAGTCTTTATCATACAAGAGAAAAATAAAACACTGCAAGATA  
AGAATGCCGATTACCAGACAAATGGAGAAATTGTATGCAAAGACTGTGGACAGGCTTGGG  
GAAATATGATGGTTCACCGAGGTCTTGACCTGCCTTGTCTAAAGATTAGAAATTTTGTGGTT  
GTGTTTGCAGACAAGAAAACAACAAAGCAAATTTTAAAGAAATGGGGAGAACTGCCCATCA  
GGTTTCCTAGTTTTGATTATGCAGCTCATTGTCCTTCAAGTGATGAAGAT

>pseudopodoces\_humilis-passeriformes-mda5

ATGGCAGAGGGCACCCGGGACGAGCGGTTCTCTACATGATCTCCTGCTTCAGGCCGCG  
GCTGAAGCAGTTCATCCAGGTGCAGCCCGTGTCTGGACCGGCTCCCCTCGCTGAGCGCGG  
AGGACAGGGACAGGGTGCGGGCGGCCGCCCTGCAGCGCGGCGCGGCGGGCGGGCGCGG  
AGGAGCTGCTGCGGGCCGTGGAGCGCGGGCCCCGCGGCTGCGGCTGGATCCGCGAGTT  
CCTGCAGGCGCTGGAGCACGGTGGCTGCAGCCTGGCAGCCTGCTACGCCAACCCAGCC  
TGAGCCAGCTGCCATCGGCGGCAGAGGAGGCCGAGCACGACCTCTGCGTGCAGCTGGTG  
CAGCTGCTGCACGGCACGCTGGTGGACAGGATGCGCACCGTGCAGGTGGCCGCCAGGT  
GCCTGGAGATGGGCATCTTCCAGGAGGAGGACATGGATCGGATCCAGACTGCTACTGATA  
ATCGTGGAACAGAGATGGTGCAAGGGAGTTACTGAGCAGAATAGTCCAGAAGAAAGATT  
GGTTCTCTTCTTTTTGGTTGCTCTCCGTGAAACCCAACATGAGGACCTTGCAGATGATTTA  
AGTGGAATAACAGGA-----

GAGAATAAACAAAATGGGACAGAGCAGACTACAAATGAAGAACTGAAGTTAGAAGCCAAC  
CAGGATATGACATAGAGGAGAATTTGAAACAGGAAGAAAATGTGGATGATAGTTTCAGCAG  
TGAGAACAGTGTGTTGGAACATCCATACAAGAGAATTCTGTGGTGTGAGAGTCAGATGTC  
TCCATAGGAGATAGAAGCGTCAGTAACTTAAATGAAAATCTGGGACAGAGCTGCACAGCCA  
CTGATTGAGATGAAGTAGAG-----

AGGAGAGCCTCACCTCAGCCAGATCTGACCCTGAGAGATTACCAGATGGAAGTTGCAAAG  
CCAGCACTGAATGGGGAGAATATTATAATATGTCTCCCTACGGGCAGTGGTAAACCAGAG  
TGGCTGTTTACATTACCAAGGATCACTTGGATAAGAAGAAAAGGGCATCAGAGCCTGGAAA  
AGTCATAGTACTTGTTAACAAGGTTCCATTGGTAGAACAGCATTTACAAACAGAGTTTAGTC  
CATTCCTGAAGCGCTGGTATCAGGTTATTGGCTTAAGTGGTGATTCTCAGCTGAAAATCTC  
ATTTCTGAAGTTGTGAGAAGAAATGATGTCATCATCAGTACAGCACAGATCCTTGAGAATT  
CACTGTTAAATGCATCCAAGGAAGATGAAGAATATGTCCACTTATCAGATTTTTCCCTCATC  
ATTATTGATGAATGTCATCACACTCAAAAGGAAGGTGTCTACAACAATATAATGCGACGTTA  
CTTAAAAGAAAAGATGAAGAACAGGAAGCTGGCAAAAGAAAACAAACCACTGATCCACAG  
CCTCAGATTCTGGGACTTACAGCCTCACCTGGTGTAGGAGGTGCAACATCCTACTCAAAAG  
CTGAAGAGCATATTCTGAAAATCTGTGCCAATCTTGATGCATGTAGAATTATGACTGTTGAA  
GAGCATGCCCCCAGCTGAAGAACCAGGTGAAGGAACCATCTAAGAAGACTGTGATTGCA  
GATGACAAAAAAGGGATCCATTTAAAGAGAGAATTACTGAGATCATGACAGAAATACAAAA  
CTATTGCCAGCTGCATCCAAAGTCTGAGTTTGGAACTCAGACGTATGAACAGTGGGTGATT  
AGAGAAGAGAGAAGAGCTGCAAAAGAAGAAAAACGCAGGGAACGTGTCTGTGCAGAACAC  
TTGAAGAAATACAATGATGCTCTCCAGATAAATGACACCATCCGAATGGTGGATGCCTACA  
ATCACCTAGATAACTTCTATAAAGAGGAGAAAAGTAAGAAGACAGTAAGGAGTGATGATGA  
TGATGAACCAGCAGTATCAAAACAGGATGAAACAGATGAATTTCTAATAGGTTTATTTTCATG  
CAAAAAGAAACAGCTGAAAGAGTTGACTGGAAATCCAGAAAATGAAAATGAGAAGCTAAT  
AAAGTTGAGAAATACTTTAATGGAGGAGTTCACAAAGACTGAGGAACCTCGAGGAATCATT  
TTCACAAAGACTCGTCTAAGTGCCCTTGTCTATTCCAGTGGATTAAGGACAACCCAAAATT



TGAAGAAGTGGGAATTAGGGCCCATTATCTTATCGGCTCTGGACATAAGAGTGAAATCAAG  
CCCATGACTCAGAATGAGCAAAGGGAAGTTATTGATAAATTTTCGATGTGGAAATGTAAATTT  
ACTAATTGCTACTACTGTAGCTGAGGAAGGACTGGACATCAAAGAGTGTAAACATCGTTATT  
CGCTATGGCCTTGTACCAATGAAATTGCTATGGTGCAGGCTCGTGGTAGAGCTCGAGCT  
GATGAAAGCACCTATGCTCTTGTGGCTTCAAGTGGCTCAGGGGCTGTTGAACGTGAAGAT  
GTTAATATTTTTTCGTGAGAAAATGATGTATAAGGCCATTTCGGCGTGTCCAGAAGATGCCAC  
AGGAAGAGTATTTAAATAAGATTCAGAGTTTCCAGTTGCAAAGTATAGTGGAAAAACAAATG  
AAGGCAAAGAGAGATCAGCGCAAGACATGCAAGAAAAATCCTTCACTAATAAACTCTTAT  
GCAAAAATTGCAACAAGCTGATATGTTCTGGAGAAGACATACAAGTTATTGAAGACATGCAT  
CATGTCAGTGTGAAAAAAGATTTTCCAGGTCTTTATCATACAAGAGAAAAATAAAACACTGCA  
AGATAAGAATGCTGATTCCCAGACAAATGGGGAAATTGTATGCAAAGACTGTGGACAGGCT  
TGGGGAAATATGATGGTTCACCGAGGTCTTGACCTGCCTTGTCTAAAGATTAGAAATTTTGT  
GGTTGTGTTTGCAGACAAGAAAACAACAAAGCAAATTTTAAAGAAATGGGGAGAACTGCCC  
ATCAGGTTTCCTAGTTTTGATTATGCAGCTTATTGTCCTTCAAGTGATGAAGAT

>erythrura\_gouldiae-passeriformes-mda5

ATGGCAGAGGGCACCCCCGACGAGCGGTTCTCTACATGATCGCCTGCTTCAGGCCGCG  
GCTGAAGCAGATCATCCGCGTGGAGCCCGTGCTGGACCAGCTCCCCTCGCTGAGCGCGG  
AGCAGAGGGAGCGGGTGCGCGCGGCCGCCCTGCAGCGCGGCGCGCGCGCGGGCGCGG  
AGGAGCTGCTGCGCGCCGTGGAGCGGGGGCCCCGCGGCTGCGGCTGGGTCCGCGAGTT  
CCTGCAGGCGCTGGAGCGCGGCGGCTGCGGCCTGGCCGCCTGCTACGCCAACCCACGC  
CTGAGCCAGCTGCCCTCGCCGGCAGAGGAGGCCGAGCACGACCTCTGCGTGCACCTGGT  
GCAGCTGCTGCACGGCACGCTGGTGGACAGGATGCGCGCCGTGCAGGTGGCCGAGAAG  
TGCCTGCAGGTGGGAATCTTCCAGGACGAGGACGTGGATCGGATCCAGACTGTTACTGAC  
AATCGTGGGAACAGAGATGGTGAAGGGAGTTACTGAGCAGAATAGTCCAGAAGAAAGAT  
TGGTTCTCTTCTTTTTTATTGCTCTCCGTGAAACCCAGCATGAAGACCTTGCAGATGATTT  
AAGTGGAATACAGGA-----

GAGAATAAACAAAATGGGATGGAGCAGACTACAAATGAAGAAACAGAAGTTACAAGCCAAC  
CAGGAAACGTCATAGAGGAGAATGTGAAACTGGAAGAAAATGTGGATGATAGTTTCAGCAG  
TGAGAGCAGTCTGTTGGAACATCCGTGCGAAAAGAATTCTGTGGTGTGAGATCAGATGTC  
TCCATAGGAGATGGAAGTGTTAATAATTTGAATGAAAATCTGGAACAGAGCTGCACAGCCA  
ATGATTGAGATGAAGTGGAG-----

AGGAGAGCCTCACCTGAGCCAGATCTGACCCTGAGAGATTACCAGATGGAAGTGGCAAAG  
CCAGCATTGAATGGGGAGAATATTATAATATGTCTCCCTACGGGCAGTGGTAAAACCAGAG  
TGGCAGTTTACATAACCAAAGATCACTTGGACAAGAAGAAAAGAGCATCAGAGCCTGGAAA  
AGTCATAGTACTTGTTAATAAGGTTCCACTGGTAGAACAGCATTTAAAAACAGAGTTTGGTC  
CATTCCTGAAGCGTTGGTATCAGGTTATTGGTTAAGTGGTGATTCTCAGCTGAAAATCTCA  
TTTCCTGAAGTTGTCAGAAGGAATGATGTCATCATCAGTACAGCACAGATCCTTGAGAACT  
CACTTTTAAATGCATCCAAGGAAGATGAAGAAAGTGTCCACTTATCAGATTTTTCCCTCATC  
ATCATCGATGAGTGTATCAGCTCAAAGGAAGGTGTCTACAATAATATAATGAGACGTTA  
CTTAAAAGAAAAGATGAAGAACAGGAAGCTGGCAAAAAGAAAACAAACCACTGATCCCACAG  
CCCCAGATTCTGGGACTTACAGCCTCACCTGGTGTAGGAAGTGAACATCCTACTCAAAG  
CTGAAGAGCATATTCTGAAAATCTGTGCCAATCTTGATGCATGTAGAATTATGACTGTTGAA  
GAGCATGCCTCCCAGCTAAAGAATCAGGTGAAGGAACCATCTAAGAAGACTGTGATTGCA  
GATGACAAAAAAGGGATCCATTTAAAGAGAAAATTACTGAGATCATGACAGAAATACAAAA

CTATTGCCAGCTGCATCCAAAGCCTGAGTTTGGAACTCAGACATATGAACAGTGGATGATC  
AGAGAAGAGAAAAGAGCTGCAAAAGAAGAAAAACGCAGGCAACGTGTCTGTGCAGAGCAC  
TTGAAGAAATACAATGATGCTCTCCAGATAAATGACACCATCCGAATGGTGGATGCCTACA  
ATCTCCTAAATAACTTCTATAAAGAGGAGAAAAGTAAGAAGACAGTAAGGAGTGACGATGA  
TGATAAACCAGCAGTATCAAAACAGGATGAAACAGATGAATTTCTAATAGGTTTATTTTCATG  
CAAAAAGAAACAGCTGAAAAGAGTTGACTAGAAAACCAGAAAATGAAAATCAGAAGCTCAT  
GGAGTTGAGAAATACTTTAATGGAGGAGTTCACAAAGACTGAGGAACCTCGAGGAATCATT  
TTCACAAAGACTCGTCTAAGTGCCCTTTGCTCTTTTCCAGTGGATTAAGGACAACCCAAAATT  
TGAAGAAGTGGGAATTAAGGCCATTATCTTATTGGCTCTGGACATAAGAGTGAAATGAAG  
CCCATGACTCAGAATGAGCAAAGGGAAGTAATTGATAAATTTTCGATGTGGAATGTAAATTT  
ACTAATTGCTACTACTGTAGCTGAGGAAGGCCTGGACATCAAAGAGTGTAACATTGTTATTC  
GCTATGGCCTCGTCACCAATGAAATTGCCATGGTGCAGGCTCGTGGTAGAGCTCGGGCTG  
ATGAAAGCACCTATGCTCTTGTTGCTTCAAGTGGCTCAGGGGCTGTTGAACGTGAAAATGT  
TAATATTTTTTCGTGAGAAAATGATGTATAAGGCCATTGAGCATGTCCAGAAGATGCCACAGG  
AAGAGTATTTAAATAAGATTCAGAGTTTCCAGTTGCAAAGTGTAGTGGAACAAATGAAG  
GTGATGAGAGATCAGCGCAAGACATACAAGAAAAATCCTTCACTAATAAAATTCTTATGCAA  
AAATTGCTCCAAGTCGATATGTTCTGGAGAAGACATACAAGTTATTGAAGACATGCATCATG  
TTAGTGTGAAAAAAGATTTCCAAAGTCTTTATCATATAAGAGAAAATAAAACCCTGCAAGATA  
AGCGTGCTGATTACCAGACAAATGGGGAAATTACATGCAAAGACTGTGGGCAAGCTTGGG  
GAAATATGATGGTTCACCGAGGTCTTGACCTGCCTTGTCTAAAGATTAGAAATTTTGTGGTT  
GTGTTTGCAGACAAGAAAACAACAAATGATATTTTTTAAGAAATGGGGAGACCTACCCATTAG  
GTTTCCTAGTTTTGATTATGCAGCTCATTGTCTTCAAGTGATGAAGAT

>lonchura\_striata\_domestica-passeriformes-mda5

ATGGCAGAGGGCACCCGGGACGAGCGGTTCCCTGTACATGATCTCCTGCTTCAGGCCGCG  
GCTGAGGCAGATCATCCAGGCGCAGCCCGTGCTGGACCAGCTCCCCGCGCTGAGCGCGG  
AGGACAGGGACAGGGTGCCTGCGGCCGCGCTGCAGCGCGGCGCGGCGGGCGCGCGG  
AGGAGCTGCTGCGGGCCGTGGAGCGCGGCCCCCGCGGCCGCGGCTGGATCCGCGAGTT  
CCTGCTGGCGCTGGAGCGCGGCGGCTGCGGCCTGGCCGCCTGCTACGCCAACCCACGC  
CTGAGCCAGCTGCCCTCGCCGGCGGAGGAGGCCGAGCACGACCTCTGCGTGCACCTGGT  
GCAGCTGCTGCACGGCACGCTGGTGGACAGGATGCGCGCCGTGCAGGTGGCCGAGAAG  
TGCTTGACAGATGGGAATCTTCCAGGACGAGGACGTGGATCGGATCCAGACTGTTACTGAC  
AATCGTGGGAACAGAGATGGTGAAGGGAGTTACTGAGCAGAATAGTCCAGAAGAAAGAT  
TGGTTTTCTTCTTTTTTGATTGCTCTTCGTGAAACCCAGCATGAAGACCTTGACAGATGATT  
AAGTGGAATACAGGA-----

GAGAGTAAACAAAATGGGATGGAGCAGACTACAAATGAAGAAACAGAAGTTACAAGCCAAC  
CAGGAAACGTCATAGAGGAGAATTTGAAACAGGAAGAAAATGTGGATGATAGTTTCTGCAG  
TGAGAGCAGTCTGTTGGAACATCCATAGAAAAGAATTCTGTGGTGTGAGATCAGATGTC  
TCCACAGGAGATGGAAGTGTGAGTAAGTGAATGAAAATCTGGAACAGAGCTGTACAACCA  
GTGATTGAGATGAAGTGGAG-----

AGGAGAGCCTCACCTGAGCCAGATCTGACCCTGAGAGATTACCAGATGGAAGTGGCAAAG  
CCAGCACTGAATGGGGAGAATATTATAATATGTCTCCCTACAGGCAGTGGTAAAACCAGAG  
TGGCAGTTTACATTACCAAAGATCACTTGGATAAGAAGAAAAGAGCATCAGAGCCTGGAAA  
AGTCATAGTACTTGTAAATAAGGTTCCGCTGGTAGAACAGCATTTAAAAACAGAGTTTAGTC  
TATTCCTGAAACGTTGGTATCAGGTTATTGGTTTAAGTGGTGATTCTCAGCTGAAAATCTCA

TTTCCTGAAGTTGTCAGAAGAAATGATGTCATCATCAGTACAGCACAGATCCTTGAGAACTC  
ACTTTTAAATGCATCCAAGGAAGATGAAGAAAGTGTCCTTATCAGATTTTTCCCTCATCA  
TCATCGATGAGTGTATCACACTCAAAGGAAGGTGTCTACAATAATATAATGAGACGTTAC  
TTAAAAGAAAAGATGAAGAACAGGAAGCTGGCAAAGGAAAACAAACCACTGATCGCACAGC  
CTCAGATTCTGGGACTTACAGCCTCACCTGGTGTAGGAGGTGCAACATCCTACTCAAAGC  
TGAAGAGCATATTCTGAAAATCTGTGCCAATCTTGATGCATGTAGAATTATGACTGTTGAAG  
AGCATGCCTCCCAGCTAAAGAATCAGGTGAAGGAACCATCTAAGAAGACTGTGATTGCAGA  
TGACAAAAAAGGGATCCATTTAAAGAGAAAATTACTGAGATCATGACAGAAATACAAAAC  
ATTGCCAGCTGCATCCAAGCCTGAGTTTGGAACTCAGACATATGAACAGTGGGTGATCAG  
AGAAGAGAAAAGAGCTGCAAAGAAGAAAAACGCAGGGAACGTGTCTGTGCAGAGCACTT  
GAAGAAATACAATGATGCTCTCCAGATAAATGACACCATCCGAATGGTGGATGCCTACAAT  
CTCCTAAATAACTTTTATAAAGAGGAGAAAAGTAAGAAGACAGTAAGGAGTGTGATGATGA  
TAAACCAGCAGTATCAAACAGGATGAAACAGATGAATTTCTAATAGGCTTATTTTCATGCAA  
AAAAGAAACAGCTGAAAGAGTTGACTAAACAACCAGAAAATGAAAATGAGAAGCTCATGAA  
GTTGAGAAATACTTTAATGGAGGAGTTCACAAAGACTGAGGAACCTCGAGGAATCATATTC  
ACAAAGACTCGTCTAAGTGCCTTTGCTCTTTTCCAGTGGATTAAGGACAACCCAAAATTTGA  
AGAAGTGGGAATTAAGGCCATTATCTTATTGGCTCTGGACATAAGAGTGAATGAAGCCC  
ATGACTCAGAATGAGCAAAGGGAAGTAATTGATAAATTTTCGATGTGGAATGTAAATTTACT  
AATTGCTACTACTGTAGCTGAGGAAGGCCTGGACATCAAGGAGTGTAACATTGTTATTCGC  
TATGGCCTCGTCACCAATGAAATTGCCATGGTGCAGGCTCGTGGTAGAGCTCGGGCTGAT  
GAAAGCACCTATGCTCTTGTTGCTTCAAGTGGCTCAGGGGCTGTTGAACGTGAAAGTGTTA  
ATATTTTTCGTGAGAAAATGATGTATAAGGCTATTCAGCGTGTCCAGAAGATGCCACAGGA  
AGAGTATTTAAATAAGATTCAGAGTTTCCAGTTGCAAAGTGTAGTGGAAAAACAAATGAAGG  
TGATGAGAGATCAGCGCAAGACATACAAGAAAATCCTTCACTAATAAAATTTCTTATGCAAA  
AATTGCTCCAAGTCGATATGTTCTGGAGAAGACATACAAGTTATTGAAGACATGCATCATGT  
TAGTGTGAAAAAGATTTCCAAAATCTTTATCATATAAGAGAAAACAAAACACTGCAAGATAA  
GCATGCTGATTACCAGACAAATGGGGAAATTATATGCAAAGACTGTGGACAAGCTTGGGGA  
AATATGATGGTTCACCGAGGTCTTGACCTGCCTTGTCTAAAGATTAGAAATTTTGTGGTTGT  
GTTTGCAGACAAGAAAACAACAAATGGTATTTTTAAGAAATGGGGAGACCTGCCATTAGG  
TTTCCTAGTTTTGATTATGCAGCTCATTGTCCTTCAAGTGATGAAGAT

>taeniopygia\_guttata-passeriformes-mda5

ATGGCAGACGGCACCCGGGACGAGCGGTTCTGTACATGATCTCCTGCTTCAGGCCGCG  
GCTGAAGCAGATCATCCAGGCGCAGCCCGTGCTGGACCAGCTCCCCTCGCTGAGCGCGG  
AGGACAAGGACAGGGTGCGTGCGGCCGCCCTGCAGCGCGGCGCGGCGGGCGCGG  
AGGAGCTGCTGCGGGCCGTGGAGCGGGGGCCCCGCGGCTGCGGCTGGATCCGCGAGTT  
CCTGCAGGCGCTGGAGCGCGGCGGCTGCAGCCTGGCCGCCTGCTACGCCAACCCAGC  
CTGAGCCAGCTGCCCTCGCCGGCAGAGGAGGCCGAGCACGACCTCTGCGTGCACCTGGT  
GCAGCTGCTGCACGGCACGCTGGTGGACAGGATGCGCGCCGTGCAGGTGGCCGAGAAG  
TGCCTGCAGATGGGAATCTTCAGGACGAGGACGTGGATCGGATCCAGACTGTTACTGAC  
AATCGTGGGAATAGAGATGGTGAAGGGAGTTACTGAGCAGAATAGTCCAGAAAAAGATT  
GGTTCTCTTCTTTTTTATTGCTCTCCGTGAAACCCAGCATGAAGACCTTGCAGATGATTTA  
AGTGGAATACAGGA-----

GAGAGTAAACAAAATGGGATGGAGCAGACTACAAATGAAGAAACAGAAGTTACAAGCCAG  
CCAGGAAACGTCATAGAGGAGAATTTGAAACAGGAAGAAAATGTGGATGATAGTTTCAGCA

GTGAGAGCAGTCTGTTGGAAACATCCATAGAAAAGAATTCTGTGGTGTGTCAGAGTCAGATGT  
CTCCATAGGAGATGGAGGTGTCAGTAACTCGAATGAAAATCTGGAACAGAGCAGCACAAC  
CAGTGATTCAGATGAAGTGGAG-----

AGGAGAGCCTCACCTGAGCCAGATCTGACCCTGAGAGATTACCAGATGGAAGTGGCAAAG  
CCAGCATTGAATGGGGAGAATATTATAATATGTCTCCCTACAGGCAGTGGTAAAACCAGAG  
TGGCAGTTTACATTACCAAAGATCACTTGGATAAGAAGAAAAGAGCATCAGAGCCTGGA  
AGTCATAGTACTTGTTAATAAGGTTCCACTGGTAGAACAGCATTTAAAAACAGAGTTTAGTC  
CATTCCTGAAACGTTGGTATCAGGTTATTGGTTTAAAGTGGTGATTCTCAGCTGAAAATCTCA  
TTTCCTGAAGTTGTCAGAAGAAATGATGTCATCATCAGTACAGCACAGATCCTTGAGAACTC  
ACTTTTAAATGCATCCAAGGAAGATGAAGAAAGTGTCCACTTATCAGATTTTTCCCTCATCA  
TCATCGATGAGTGTATCACACTCAAAGGAAGGTGTCTACAATAATATAATGAGACGTTAC  
TTAAAGAAAAGATGAAGAACAGGAAGCTGGCAAAGGAAAACAAACCACTGATCCACAGC  
CTCAGATTCTGGGACTTACAGCCTCACCTGGTGTAGGAGGTGCAACATCCTACTCAAAGC  
TGAAGAGCATATTCTGAAAATCTGTGCCAATCTTGATGCATGTAGAATTATGACTGTTGAGG  
AGCATGCCTCCCAGCTAAAGAATCAGGTGAAGGAACCATCTAAGAAGACTGTGATTGCAGA  
TGACAAAAAAGGGATCCATTTAAAGAGAAAATTACTGAGATCATGACAGAAATACAAACT  
ATTGCCAGCTGCATCCAAGACTGAGTTTGGAACTCAGACATATGAACAGTGGGTGATCAG  
AGAAGAGAAAAGAGCTGCAAAGCAGAAAAACGCAGGGAACGTGTCTGTGCAGAGCACTT  
GAAGAAATACAATGATGCTCTCCAGATAAATGACACCATCCGAATGGTGGATGCCTACAAT  
CTCCTAAATAACTTTTTATAAGAGGAGAAAAAGTAAGAAGACAGTAAGGAGTGATGATGATGA  
TAAACCAGCAGTATCAAACAGGATGAAACAGATGAATTTCTAATAGGCTTATTTTCATGCAA  
AAAAGAAACAGCTGAAAGAGTTGACTAGAAAACCAGAAAATGAAAATGAGAAGCTCATGAA  
GTTGAGAAATACTTTAATGGAGGAGTTCACAAAGACTGAGGAACCTCGAGGAATCGTATTC  
ACAAAGACTCGTCTAAGTGCCTTTGCTCTTTTCCAGTGGATTAAGGACAACCCAAAATTTGA  
AGAAGTGGGAATCAAGGCCCATTTATCTTATTGGCTCTGGACATAAGAGTGAAATGAAGCCC  
ATGACTCAGAATGAGCAAAGGGAAGTAATTGATAAATTTTCGATGTGGAAATGTAAATTTACT  
AATTGCTACTACTGTAGCTGAGGAAGGCCTGGACATCAAAGAGTGTAACATTGTTATTCGC  
TATGGCCTCGTCACCAATGAAATTGCCATGGTGCAGGCTCGTGGTAGAGCTCGGGCTGAT  
GAAAGCACCTATGCTCTTGTTGTTTCAAGTGAAGTCAAGGGGCTGTTGAACGTGAAAGTGTTA  
ATATTTATCGTGAGAAAATGATGTATAAGGCTATTCAGCGTGTCCAGAAGATGCCACAGGA  
AGAGTATTTAAATAAGATTCATAATTTCCAGTTGCAAAGTATAGTGGAAAAACAAATGAAGG  
TGATGAGAGATCAGCGCAAGACATACAAGAAAAATCCTTCACTAATAAAATTCTTATGCAAA  
AATTGCTCCAAGTCGATATGTTCTGGAGAAGACATACAAGTTATTGAAGACATGCATCATGT  
TAGTGTGAAAAAAGATTTCCAAAGTCTTTATCATATAAGAGAAAACAAAGCACTGCAAGATA  
AGCATGCTGATAACCAGACAAATGGGGAAATTATATGCAAAGACTGTGGACAAGCTTGGGG  
AAATATGATGGTTCACCGAGGTCTTGACCTGCCTTGTCTAAAGATTAGAAATTTTGTTGTTG  
TGTTTGCAGACAAGAAAATAACAAATGATATTTTTAAGAAATGGGGAGACCTGCCCATTAGG  
TTTCCTAGTTTTGATTATGCAAGTCATTGTCTTCAAGTGACGAAGAT

>passer\_montanus-passeriformes-md5

ATGGCAGAGGGCACCCGGGACGAGCGGTTCTCTACATGCTCTCCTGCTTCAGGCCGCG  
GCTGAAGCAGTTCATCCAGGTGCAGCCCGTGCTGGACCGGCTCCCCTCGCTGAGCGCGG  
ACGACAGGGACAGGGTGCCTGCGGCCGCCGTGGAGCGGGGCGCGGCGGGCGCGG  
AGGAGCTGCTGCGGGCCGTGGAGCGGGGGCCCCGCGGCTGCGGCTGGATCCACGAGTT  
CCTGCAGGCGCTGGAGCACGGCGGCTGCAGCCTGGCCGCCTGCTACGCCAACCCAGC

CTGAGCCAGCTGCCCTCGCCGGCAGAGGAGGCCGAGCACGACCTCTGCGTGACCTGGT  
GCAGCTGCTGCACGGCACGCTGGTGGACAGGATGCGCACCGTGACAGGTGGCCCACAAGT  
GCCTGGAGATGGGAATCTTCCAGGACGAGGACGTGGATCGGATCCAGGCTGTTACTGACA  
ATCGTGGAACAGAGATGGTGCAAGGGAGCTACTGAGCAGAATAGTCCAGAAGAAAGATT  
GGTTCTCTTCTTTTTTGGTTGCTCTCCGTGAAACCCAACATGAAGACCTTGCAGATGATTTA  
AGTGGAAATACAGGA-----  
GAGAATAAACAAAATGGGATGGAGCAGACTACGAACGAAGAAACAGAAGTTACCAGCCAA  
CCAGGATACATCATAGAGGAGAATTTGAAACAGGAAGAAAATGTTGATGATAGTTTCAGCA  
GTGAGAACAGTCTGTTGGAAACATCCACGGAAAAGAATTCTGTGATGTCAGAGTCAGATGT  
CTCCATAGGAGATGGGAGTGTCACTAATTGAATGAAAACCTGGAACAGAGTTGCACAACC  
AGTGATTCAGATGAAGTGGAG-----  
AGGAGAGCCTCACCTGAGCCAGATCTGACCCTGAGAGATTACCAGATGGAAGTTGCAAAG  
CCAGCATTGAATGGGGAGAATATTATCATATGTCTCCCTACAGGCAGTGGTAAAACCAGAG  
TGGCTGTTTACATTACCAAAGATCACTTGGATAAGAAGAAAAGAGCATCAGAGCCTGGAAA  
AGTCATAGTACTTGTTAATAAGGTTCCATTGGTAGAACAGCATTAAAAACAGAGTTTAGTC  
CATTCCTGAAGCGTTGGTATCAGGTTATTGGTTAAGTGGTGATTCTCAGCTGAAAATCTCA  
TTTCCTGAAGTTGTCAGAAGAAACGATGTCATCATCAGTACAGCACAGATCCTTGAGAATTC  
ACTGTTAAATGCATCCAAGGAAGATGAAGAAAGTGTCCACTTATCAGATTTTTTCCCTCATCA  
TCATCGATGAGTGTCACTCAAAAGGAAGGTGTCTACAATAATATAATGAGACGTTAC  
TTAAAAGAAAAGATGAAGAACAGGAACTGGCAAAAGAAAACAAACCACTGATCCACAGC  
CTCAGATTCTGGGACTTACAGCCTCACCTGGTGTAGGAGGTGCAACATCCTACTCAAAGC  
TGAAGAGCATATTTTGAATCTGTGCCAATCTTGATGCATGTAGGATTATGACTGTTGAAG  
AGCATGCCTCCCAGCTAAAGAATCAGGTGAAAGAACCATCTAAGAAGACTGTGATTGCAGA  
TGACAAAAAAGGGATCCATTTAAAGAGAGAATTATTGAGATCATGACAGAAATACAAAAT  
ATTGCCAGCTGCATCCGAGCTCTGAGTTTGGAACTCAGACATATGAACAGTGGGTGATCAG  
AGAAGAGAAAAGAGCTGCAAAAGAAGAAAAACGCAGGGAACGTGTCTGTGCAGAGCACTT  
GAAGAAATACAACGATGCTCTCCAGATAAATGACACCATCCGAATGGTGGATGCCTACAAT  
CACCTAAATAACTTCTATAAAGAGGAGAAAAGTAAGAAGACAGTAAGGAGTGATGATGATG  
ATGAACCAGCAGTATCAAAACAGGATGAAACAGATGAATTTCTAATAGGTTTATTTTCATGCA  
AAAAAGAAACAGCTGAAAGAGTTGACTAAAAGCCAGAAAATGAAAATGAGAAGCTAACGG  
AGTTGAGAAATACTTTAATGGAGGAGTTCACGAAGACTGGGGAACCTCGAGGAATCATTTT  
CACAAAGACTCGTCTAAGTGCCTGTGCTCTTTTCCAGTGGATTAAGGACAACCCAAAATTT  
GAAGAAGTGGGAATTAGGGCCCATTATCTTATCGGTGCTGGACATAAGAGTGAAATGAAGC  
CCATGACTCAGAATGAGCAAAGGGACGTTATTGATAAATTTTCGATGTGGAAATATAAATTTA  
CTAATTGCAACTACTGTAGCTGAGGAAGGCCTGGACATCAAAGAGTGTAACATTGTTATTC  
GCTATGGCCTCGTCACCAATGAAATTGCTATGGTGCAGGCTCGTGGTAGAGCTCGAGCTG  
ATGAAAGCACCTATGCTCTTGTGGCTTCAAGTGGCTCAGGGGCTGTTGAACGTGAAAGTGT  
TAATATTTTTTCGTGAGAAAATGATGTATAAAGCCATTCAGCGTGTCCAGAAGATGCCACAGG  
AAGAGTATTTAAAAAAGATTCAGACTTTCCAGTTGCAAAGTATAGTGGAAAAACAAATGAAG  
GTGATGAGAGATCAGCGCAAGACATACAAGAAAAATCCTTCACTAATAAAATTCTTATGCAA  
AAATTGCTCCAAGCTGATATGTTCTGGAGAAGACATACAAGTTATTGAAGACATGCATCATG  
TCAGTGTGAAAAAAGATTTCCAAAGTCTTTATCATACAAGAGAAAATAAAGCACTGCAAGAT  
AAGCGTGCTGATTACCAGACAAATGGGGAAATTATATGCAAAGACTGTGGACAAGCTTGGG  
GAAATATGATGGTTCACCGAGGTCTTGACCTGCCTTGTCTAAAAATCAGAAATTTTGTGGTT

GTGTTAGCAGACAAGAAAACAACAAACAATATTTTTAAGAAATGGGGAGACCTGCCCATCA  
GGTTTCCTAGTTTTGATTATGCAGCTCATTGTCCTTCAAGTGATGAAGAT

>melospiza\_melodia-passeriformes-md5

ATGGCAGAGGGCAGCCGGGACGAGCTGTTCTCTACATGATCGACTGCTTCAGGCCGCG  
GCTGAAGCAGTTCATCCAGGTGCAGCCCGTGCTGGACCGGCTGCCCTCGCTGAGCGCCG  
AGGACCGGGACAGGGTCCGTGCGGCCGCCGAGCAGCGGGGCGCGGCCGCGGGCGCCG  
AGGAGCTGCTGCAGGCCGTGGAGCGGGGGCCCCGCGGCCGCGGCCCGATCCGCGAGTT  
CCTGCAGGCGCTGGAGTACGGCGGCTGCAGCCTGGCCGCCTGCTACGCCAACCCAGCC  
TGAGCCAGCTGCCCTCGCCGGCAGAGGAGGCCGAGCACGACCTCTGCGTGACCTGGTG  
CAGCTGCTGCACGGCACGCTGGTGGACAGGATGCGCGCCGGGCCGGTGGCCCAGAAAT  
GCCTGCAGATGGAGATCTTCCAGGACGAGGACGTGGAGCGGATCCAGACTGTTATTGACA  
ATCGTGGGAACAGAGATGGTGCAAGGGAGCTACTGAGCAGAATAGTCCAGAAGAAAGCCT  
GGTTCTCTCTTTTTTTGATTGCTCTCCGTGAAACCCAACATGAAGACCTTGCAGATGATTTA  
AGTGGAATACAGGA-----

GAGAATAAACAAAGTGGGATGGAGCAGACTACGAATGAAGAAACAGAAGTTACAAGCCAA  
CCAGGATACGTCACAGAGGAGAATTTGAAACAGGAAGAAAATGTGGATGACAGTTCCAGC  
AGTGAGAACAGTCTGTTGGAACATCCATAGAAAAGAATTCTGTGATGTCAGAGTCAGATG  
TCTCCATAGGAGATGGAAGTGTGAGTAGCTTGAATGGAACCTGGAACAGAGCTGCACTAC  
CAGTGATTCAGATGAAGTGGAG-----

AGGAGAGCCTCACCTGAGCCAGATCTGACCCTGAGAGATTACCAGATGGAAGTTGCAAAG  
CCAGCATTGAATGGGGAGAATATTATCATATGTCTCCCTACAGGCAGTGGTAAAACCAGAG  
TGGCTGTTTACATTACCAAAGATCACTTGGATAAGAAGAGAAGAGCATCAGAGCCTGGAAA  
AGTCATAGTACTTGTAAATAAGGTTCCATTGGTAGAACAGCATTAAAAAGAGAGTTTAGTC  
CATTCCTGAAGCGTTGGTATCAGGTTATTGGTTTAAAGTGGTGATTCTCGGCTGAAAATCTCA  
TTTCCTGAAGTTGTCAGAAGAAATGATGTCATCATCAGTACAGCACAGATCCTTGAGAATTC  
ACTGTTAAATGCATCCAAGGAAGATGAGGAAAGTGTCCACTTATCAGATTTTTCCCTCATCA  
TCATCGATGAGTGTATCATACTCAAAAGGAAGGTGTCTACAATAACATAATGAGACGTTAC  
TTAAAAGAAAAGATGAAGAACAGGAAGCTGGCAAAAGAAAACAAACCACTGATCCACAGC  
CTCAGATTCTGGGACTTACAGCCTCACCTGGTGTAGGAGGTGCAACATCCTACTCAAAAGC  
TGAAGAGCATATTCTGAAAATCTGTGCCAATCTTGATGCATGTAGGATTATGACTGTTGAAG  
AGCATGCCTCCCAGCTAAAGAATCAGGTGAAGGAACCATCTAAGAAGACTGTGATTGCAGA  
TGATAAAAAAAGGGATCCATTTAAAGAGAGAATCACTGAGATCATGACAGAAATACAGAACT  
ATTGCCAGCTGCATCCGAAGTCTGAGTTTGGAACCTCAGACATATGAACAGTGGGTGATCAG  
AGAAGAGAGAAGAGCTGCGAAAGAAGAAAAACGGAGGGGAACGTGTCTGTGCAGAGCACTT  
GAAGAAATACAATGATGCTCTCCAGATAAATGACACCATCCGAATGGTGGATGCCTACAAT  
CACCTAAATAACTTCTATAAAGAGGAGAAAAGCAAGAAGACAGTAAGGAGTGATGATGATG  
ATGAACCAGCAGTATCAAAACAGGATGAAACAGATGAATTTCTAATAGGTTTATTTTCATGCA  
AAAAAGAAACAGCTGAAAGAGTTGACTAGAAATCCAGAAAATGAAAATGAAAAGCTAACGA  
AGTTGAGAAATACTTTAATGGAGGAGTTCACGAAGACTGAAGAACCTCGAGGAATCATTTT  
CACAAAGACTCGTCAAAGTGCCCTCTGCTCTTTTCCAGTGGATTAAGGACAACCCAAAATTT  
GAAGAAGTGGGAATTAAGGCCATTATCTTATTGGCTCTGGACATAAGAGTGAAACGAAGC  
CCATGACTCAGAATGAGCAAAGGGAAATTATTGATAAATTTTCGATGTGGAAATGTAAATTTA  
CTAATTGCTACTACTGTAGCTGAGGAAGGCCTGGACATCAAGAGTGTAACATCGTTATTC  
GCTACGGCCTCGTCACCAATGAAATTGCTATGGTGCAGGCTCGCGGTAGAGCTCGAGCTG

ATGAAAGCACCTATGCTCTTGTGGTTTCAAGTGGCTCAGGGGCTGTTGAACGTGAAAATGT  
TAATATTTTTTCGTGAGAAAATGATGTACAAGGCCATTTCAGCGTGTTTCAAGAGATGCCACAG  
GAAGAGTATTTTTAAAAAGATTTCAGATTTTCCAGTCGCAAAGTATAGTGGA AAAACAAATGAA  
GGTGGTGAGAGATCAGCGCAAGACATACAAGAAAAATCCTTCACTAATAAAATTCTTATGCA  
AAAATTGCTCCAAGCCGATATGTTCTGGAGAAGACATACAAGTTATTGAAGACATGCATCAT  
GTCAGTGTGAAAAAAGATTTCCAAAGTCTTTATCATACAAGAGAAAATAAAACACTGCAAGA  
TAAGCATGCTGATTACCAGACAAATGGGGAAATTATATGCAAAGACTGTGGACAAGCTTGG  
GGAAATATGATGGTTCATCGAGGCCTTGACCTGCCTTGTCTAAAGATCAGAAATTTTGTGG  
TTGTGTTTGCAGACAAGAAAAACAACAACAAATATTTTTAAGAAATGGGGAGACCTGCCCATC  
AGGTTTCCTAGTTTTTGATTATGCAGCTCATTGTCCTTCAAGTGATGAAGAT

>junco\_hyemalis-passeriformes-md5

ATGGCAGAGGGGCACCCGGGACGAGCTGTTTCTCTACATGATCTCCTGCTTCAGGCCGCGG  
CTGAAGCAGTTCATCCAGGTGCAGCCCGTGCTGGACCGGCTGCCCTCGCTGAGCGCCGA  
GGACCGGGACAGGGTCCGTGCGGCCGCCGAGCAGCGGGGCGCGGCGGGCGGCCGA  
GGAGCTGCTGCAGGCCGTGGAGCGGGGGCCCCGCGGCCGCGGCCCGATCCGCGAGTTC  
CTGCAGGCGCTGGAGCACGGCGGCTGCAGCCTGGCCGCTGCTACGCCAACCCAGCCT  
GAGCCAGCTGCCCTCGCCGGCAGAGGAGGCCGAGCACGACCTCTGCGTGCACCTGGTGC  
AGCTGCTGCACGGCACGCTGGTGGACAGGATGCGCGCCGGGCGCGGTGGCCGAGAAGTG  
CCTGCAGATGGAGATCTTCCAGGACGAGGACGTGGAGCGGATCCAGACTGTTATTGACAA  
TCGTGGGAACAGAGATGGTGCAAGGGAGCTACTGAGCAGAATAGTCCAGAAGAAAGACTG  
GTTCTCTTCTTTTTTGATTGCCCTCCGTGAAACCCAACATGAAGACCTTGCAGATGATTAA  
GTGGAAATACAGGA-----

GAGAATAAACAAAATGGGATGGAGCAGACTACGAGTGAAGAAACAGAAGTTACAAGCCAA  
CCAGGATACGTACAGAGGAGAATTTGAAACAGGAAGAAAATGTGGATGACAGTTTCAGCA  
GTGAGAGCAGTCTGTTGGAAACATCCATAGAAAAGAATTCTGTGATGTCAGAGTCAGATGT  
CTCCATAGGAGATGGAAGTGTGAGTAACCTTGAATGGAACTTGGAACAGAGCTGCACAACC  
AGTGATTCAGATGAAGTGGAG-----

AGGAGAGCCTCACCTGAGCCAGATCTGACCCTGAGAGATTACCAGATGGAAGTTGCAAAG  
CCAGCGTTGAATGGGGAGAATATTATCATATGTCTCCCTACAGGCAGTGGTAAAACCAGAG  
TGGCTGTTTACATTACCAAAGATCACTTGGATAAGAAGAGAAGAGCATCAGAGCCTGGAAA  
AGTCATAGTACTTGTTAATAAGGTTCCATTGGTAGAACAGCATTTAAAAAGAGAGTTTAGTC  
CATTCTGAAGCGTTGGTATCAGGTTATTGGATTAAGTGGTGATTCTCAGCTGAAAATCTCA  
TTTCCTGAAGTTGTCAGAAGAAATGATGTCATCATCAGTACAGCACAGATCCTTGAGAATTC  
ACTGTTAAATGCATCCAAGGAAGATGAGGAAAGTGTCCACTTATCAGATTTTTCCCTCATCA  
TCATCGATGAGTGTATCATACTCAAAGGAAGGTGTCTACAATAACATAATGAGACGTTAC  
TTAAAAGAAAAGATGAAGAACAGGAAGCTGGCAAAAAGAAAACAAGCCGCTGATCCCACAG  
CCTCAGATTCTGGGACTTACAGCCTCACCTGGTGTAGGAGGTGCAACATCCTACTCAAAAG  
CTGAAGAGCATATTCTGAAAATCTGTGCCAATCTTGATGCATGTAGGATTATGACTGTTGAA  
GAGCATGCCTCCCAGCTAAAGAATCAGGTGAAGGAACCATCTAAGAAGACTGTGATTGCA  
GATGATAAAAAAAGGGATCCATTTAAAGAGAGAATCACTGAGATCATGACAGAAATACAGA  
ACTATTGCCAGCTGCATCCGAAGTCTGAGTTTGGAACTCAGACATATGAACAGTGGGTGAT  
CAGAGAAGAGAGAAGAGCTGCGAAAGAAGAAAAACGGAGGGAACGTGTCTGTGCAGAGC  
ACTTGAAGAAATACAATGATGCTCTCCAGATAAATGACACCATCCGAATGGTGGATGCCTA  
CAATCACCTAAATAACTTCTATAAAGAGGAGAAAAGTAGGAAGACAGTAAGGAGTGATGAT

GATGATGAACCAGCAGTATCAAAACAGGATGAAACAGATGAATTTCTAATAGGTTTATTTCA  
TGCAAAAAAGAAACAGCTGAAAGAGTTGACTAGAAATCCAGAAAATGAAAATGAAAAGCTA  
ACGAAGTTGAGAAATACTTTAATGGAGGAGTTCACGAAGACTGAAGAACCTCGAGGAATCA  
TTTTACAAAGACTCGTCTAAGTGCCTCTGCTCTTTTCCGGTGGATTAAGGACAACCCAAAA  
TTTGAAGAAGTGGGAATTAAGGCCATTATCTTATTGGCTCTGGACATAAGAGTGAAACAAA  
GCCCATGACTCAGAATGAGCAAAGGGAAGTTATTGATAAATTTTCGATGTGGAAATGTAAATT  
TACTAATTGCTACTACTGTAGCTGAGGAAGGCCTGGACATCAAAGAGTGTAACATCGTTATT  
CGCTACGGCCTCGTCACCAATGAAATTGCTATGGTGCAGGCTCGCGGTAGAGCTCGAGCT  
GATGAAAGCACCTATGCTCTTGTGGCTTCAGATGGCTCAGGGGCTGTTGAACGTGAGAAT  
GTTAATATTTTTTCGTGAGAAAATGATGTACAAGGCGATTTCAGCGTGTCCAGAAGATGCCAC  
AAGAAGAGTATTTAAATAAGATTCAGAGTTTCCAGTTGCAAAGTATAGTGGAACAAACAAATG  
AAGATGGTGAGAGATCAGCGCAAGACATACAAGAAAAATCCTTCACTAATAAAATTCTTATG  
CAAAAAGTCTCCAAGCCGATATGTTCTGGAGAAGACATACAAGTTATTGAAGACATGCAT  
CATGTCAAGTGTGAAAAAAGATTTCCAAAGTCTTTATCATACAAGAGAAAAATAAAACACTGCA  
AGATAAGCATGCTGATTACCAGACAAATGGGGAAATTATATGCAAAGACTGTGGACAAGCT  
TGGGGAAATATGATGGTTCAACGAGGTCTTGACCTGCCTTGTCTAAAGATCAGAAATTTTG  
TGGTTGTGTTTGCAGACAAGAAAAACAACAAACAAATATTTTTAAGAAATGGGGAGACCTGCC  
CATCAGGTTTCTAGTTTTGATTATGCAGCTCATTGTCTTCAAGTGATGAAGAT

>zonotrichia\_albicollis-passeriformes-mda5

ATGGCAGAGGGCACCCGGGACGAGCTGTTCTATACATGATCTCCTGCTTCAGGCCGCGG  
CTGAAGCAGTTCATCCAGGTGCAGCCCGTGCTGGACCGGCTGCCCTCGCTGAGCGCCGA  
GGACCGGGACAGGGTCCGTGCGGCCGCCGAGCAGCGGGGCGCGGCGGGCGGCCGA  
GGAGCTGCTGCAGGCCGTGGAGCGGGGGCCCCGCGGCCGCGGCCCGATCCGCGAGTTC  
CTGCAGGCGCTGGAGTACGGCGGCTGCAGCCTGGCCGCCTGCTACGCCAACCCAGCCT  
GAGCCAGCTGCCCTCGCCGGCAGAGGAGGCCGAGCACGACCTCTGCGTGCACCTGGTGC  
AGCTGCTGCACGGCACGCTGGTGGACAGGATGCGCGCCGGGCGCGGTGGCCGAGAAGTG  
CCTGCAGATGGAGATCTTCCAGGAGGAGGACGTGGAGCGGATCCAGACTGTTATTGACAA  
TCGTGGGAACAGAGATGGTGCAAGGGAGCTACTGAGCAGAATAGTCCAGAAGAAAGACTG  
GTTCTCTTCTTTTTTATTGCCCTCCGTGAAACCCAACATGAAGACCTTGCAGATGATTAA  
GTGGAAATACAGGA-----

GAGAATAAACAAAATGGGATGGAGCAGACTACGAGTGAAGAAACAGAAGTTACAAGCCAA  
CCAGGATACGTCACAGAGGAGAATTTGAAACAGGAAGAAAATGTGGATGACAGTTTCAGCA  
GTGAGAACAGTCTGTTGGAAACATCCATAGAAAAGAATTCTGTGATGTCAGAGTCAGATGT  
CTCCATAGGAGATGGAAGTGTCAGTAACCTGAATGGAACTTGGAACAGAGCTGCACAACC  
AGTGATTCAGATGAAGTGGAG-----

AGGAGAGCCTCACCTGAGCCAGATCTGACCCTGAGAGATTACCAGATGGAAGTTGCAAAG  
CCAGCATTGAATGGGGAGAATATTATCATATGTCTCCCTACAGGCAGTGGTAAAACCAGAG  
TGGCTGTTTACATTACCAAAGATCACTTGGATAAGAAGAGAAGAGCATCAGAGCCTGGA  
AGTCATAGTACTTGTTAATAAGGTTCCATTGGTAGAACAGCATTTAAAAGAGAGTTTAGTC  
CATTCCTGAAGCGTTGGTATCAGGTTATTGGATTAAGTGGTGATTCTCAGCTGAAAATCTCA  
TTTCTGAAAGTTGTCAGAAGAAATGATGTCATCATCAGTACAGCACAGATCCTTGAGAATTC  
ACTGTTAAATGCATCCAAGGAAGATGAGGAAAGTGTCCACTTATCAGATTTTCCCTCATCA  
TCATCGATGAGTGTATCATACTCAAAAGGAGGGTGTCTACAATAACATAATGAGACGTTAC  
TTAAAAGAAAAGATGAAGAACAGGAACTGGCAAAAGAAAACAAGCCACTGATCCCACAGC



CTCAGATTCTGGGACTTACAGCCTCACCTGGTGTAGGAGGTGCAACATCCTACTCAAAGC  
TGAAGAGCATATTCTGAAAATCTGTGCCAATCTTGATGCATGTAGGATTATGACTGTTGAAG  
AGCATGCCTCCCAGCTAAAGAATCAGGTGAAGGAACCATCTAAGAAGACTGTGATTGCAGA  
TGATAAAAAAAGGGATCCATTTAAAGAGAGAATCACTGAGATCATGACAGAAATTCAGAACT  
ATTGCCAGCTGCATCCGAAGTCTGAGTTTGGAACCTCAGACATATGAACAGTGGGTGATCAG  
AGAAGAGAGAAGAGCTGCGAAAGAAGAAAAACGGAGGGGAACGTGTCTGTGCAGAGCACTT  
GAAGAAATACAATGATGCTCTCCAGATAAATGACACCATCCGAATGGTGGATGCCTACAAT  
CACCTAAATAACTTCTATAAAGAGGAGAAAAAGTAAGAAGACAGTAAGGAGTGATGATGATG  
ATGAACCAGCAGTATCAAAACAGGATGAAACAGATGAATTTCTAATAGGTTTATTTTCATGCA  
AAAAAGAAACAGCTGAAAGAGTTGACTAGAAATCCAGAAAATGAAAATGAAAAGCTAACGA  
AGTTGAGAAATACTTTAATGGAGGAGTTCACGAAGACTGAAGAACCTCGAGGAATCATTTT  
CACAAAGACTCGTCTAAGTGCCCTCTGCTCTTTGCCAGTGGATTAAGGACAACCCAAAATTT  
GAAGAAGTGGAATTAAGGCCATTATCTTATTGGCTCTGGACATAAGAGTGAAACAAAGC  
CCATGACTCAGAATGAGCAAAGGGAAGTTATTGATAAATTTTCGATGTGGAAATGTAAATTTA  
CTAATTGCTACTACTGTAGCTGAGGAAGGCCTGGACATCAAAGAGTGTAACATCGTTATTC  
GCTACGGCCTCGTCACCAATGAAATTGCTATGGTGCAGGCTCGCGGTAGAGCTCGAGCTG  
ATGAAAGCACCTATGCTCTTGTGGCTTCAGATGGCTCAGGGGCTGTTGAACGTGAGAATGT  
TAATATTTTTTCGTGAGAAAATGATGTACAAGGCCATTACGCGTGTCCAGAAGATGCCACAG  
GAAGAGTATTTAAATAAGATTTCAGAGTTTCCAGTTGCAAAGTATAGTGGA AAAACAAATGAA  
GGTGGTGAGAGACCAGCGCAAGACATACAAGAAAAATCCTTCACTAATAAAATTCTTATGC  
AAAAACTGCTCCAAGCCGATATGTTCTGGAGAAGACATACAAGTTATTGAAGACATGCATC  
ATGTCAGTGTGAAAAAAGATTTCCAAAGTCTTTATCATACAAGAGAAAAATAAAACACTGCAA  
GATAAGCATGCTGATTACCAGACAAATGGGGAAATTATATGCAAAGACTGTGGACAAGCTT  
GGGGAAATATGATGTTTCACCGAGGTCTTGACCTGCCTTGTCTAAAGATCAGAAATTTTGT  
GGTTGTGTTTGCAGACAAGAAAAACAACAACAATATTTTAAAGAAATGGGGAGACCTGCCC  
ATCAGGTTTCCTAGTTTTGATTATGCAGCTCATTGTCCTTCAAGTGATGAAGAT

>camarhynchus\_parvulus-passeriformes-mda5

ATGGCAGAGGGCACCCGGGACGAGCGGTTCTCTACATGATCTCCTGCTTCAGGCCGCG  
GCTGAAGCAGTTCATCCAGGTGCAGCCCGTGCTGGACCGGCTGCCCTCGCTGAGCGCGG  
AGGACCGGGACAGGGTGCTGGCGGCCGCCCTGCAGCGGGGCGCGGCGGGCGGCCG  
AGGAGCTGCTGCGGGCCGTGGAGCGGGGGCCCCGCGGCTGCGGCTGGATCCCCGAGTT  
CCTGCAGGCGCTGGAGCACGGCGGCTGCAGCCTGGCCGCTGCTACGCCAACCCAGC  
CTCAGCCAGCTGCCCTCGCCGGCAGAGGAGGCCGAGCACGACCTCTGCGTGCACCTGGT  
GCAGCTGCTGCACGGCACGCTGGTGGACAAGATGCGCGCCGGGCAGGTGGCCGAGAAG  
TGCCTGCAGATGGGAATCTTCCAGGACGAGGACGTGGATCGGATCCAGACTGTTACTGAC  
AATCGTGGGAACAGGGATGGTGCAAGGGAGCTACTGAGCAGAATAGTCCAGAAGAAAGAC  
TGGTTCTCTTCTTTTTGATTGCTCTCCGTGAAACCCAACATGAAGACCTTGCAGATGATTT  
AAGTGGAATACAGGA-----  
GAGAATAAACAAAATGGGATGGAGCAGACTACGAACGAAGAAACAGAAGTTACAAGCCAA  
CCAGGATACGTCATAGAGGAGAATTTGAAACAGGAAGAAAATGTGGATGATAGTTTCAGCA  
GTGAGAACAGTCTGTTGGAAACATCCATAGAAAAGAATTCTGTGATGTCAGAGTCAGATGT  
TTCCATAGGAGATGGAAGTGTCAGTAACTTGAATGGAACTGG-----  
AGCTGCACAACCAAGTGATTCAGATGAAGTGGAG-----  
AGGAGAGCCTCACCTGAGCCAGATCTGACCCTGAGAGATTACCAGATGGAAGTTGCAAAG

CCAGCATTGAATGGGGAGAATATTATCATATGTCTCCCTACAGGCAGTGGTAAAACCAGAG  
TGGCTGTTTACATTACCAAAGATCACTTGGATAAGAAAAAAGAGCATCAGAGCCTGGAAA  
AGTCATAGTACTTGTTAATAAGGTTCCGTTGGTAGAACAGCATTTAAAAAGAGAGTTTAGTC  
CATTCCTGAAGCGTTGGTATCAGGTTATTGGTTTAAGTGGTGATTCTCAGCTCAAAATCTCA  
TTTCCTGAAGTTGTCAGAAGAAATGATGTCATCATCAGTACAGCACAGATCCTTGAGAATTC  
ACTGTTAAATGCATCCAAAGAAGATGAAGAAAGTGCCACTTATCAGATTTTTCCCTCATCA  
TCATCGATGAGTGTCTACTCAAAAGGAAGGTGTCTACAATAACATAATGAGACGTTAC  
TTAAAAGAAAAGATGAAGAACAGGAAGCTGGCAAAAGAAAACAAACCATTGATCCCGCAGC  
CTCAGATTCTGGGACTTACAGCCTCACCTGGTGTAGGAGGTGCAACATCCTACTCAAAAGC  
TGAAGAGCATATTCTGAAAATCTGTGCCAATCTTGATGCATGTAGAATTATGACTGTTGAAG  
AGCATGCCTCCCAGCTAAAGAATCAGGTGAAGGAACCATCTAAGAAGACTGTGATTGCAGA  
TGATAAAAAAAGGGATCCATTTAAAGAGAGAATCACTGAGATCATGACAGAAATACAAAAT  
ATTGCCAGCTGCATCCGAAGTCTGAGTTTGGAACTCAGACATATGAACAGTGGGTGATCAG  
AGAAGAGAGAAGAGCTGCAAAAGAAGAAAAACCCAGGGAACGTGTCTGTGCAGAGCACTT  
GAAGAAATACAATGATGCTCTCCAGATAAATGACACCATCCGAATGGTGGATGCCTACAAT  
CACCTAAATAACTTCTATAAAGAGGAGAAAAAGTAAGAAGACAGTAAGGAGTGATGATGATG  
ATGAGCCAGCAGTATCAAAACAGGATGAAACAGATAAATTTCTAATAGGTTTATTTTCATGCA  
AAAAAGAAACAGCTGAAAGAGTTGACTAGAAAGCCAGAAAATGAAAATGAGAAGCTAATGG  
AGTTGAGAAATACTTTAATGGAGGAGTTCACGAAGACTGAAGAACCTAGAGGAATCATTTT  
CACAAAGACTCGTCTAAGTGCCCTTTGCTCTTTTCCAGTGGATTAAGGACAACCCAAAATTTG  
AAGAAGTAGGAATTAGAGCCCATTATCTTATCGGCTCTGGACATAAGAGTGAAATGAAGCC  
CATGACTCAGAATGAGCAAAGGGAAGTTATTGATAAATTTTCGATGTGGAAGTGTAATTTAC  
TAATTGCTACTACTGTAGCTGAGGAAGGCCTGGACATCAAAGAGTGTAACATCGTTATTCG  
CTACGGCCTTGTACAAATGAAATTGCTATGGTGCAGGCTCGTGGTAGAGCTCGAGCTGAT  
GAAAGCACCTATGCTCTTGTGGCTTCAAGTGGCTCAGGGGCTGTTGAACGTGAAAATGTTA  
ATACTTTTCGCGAGAAAATGATGTATACAGCCATTCAGCGTGTCCAGAAGATGCCACAGGA  
AGAGTATTTAAATAAGATTCAGAGTTTCCAGGTCCAAAGTGTAAGTGGAAAAACAAATGAAGG  
TGATGAGAGAACAGCACAAAGACATACAAGAAAAATCCTTCACTAATAAAATTTCTATGCAAA  
AATTGCTCCAAGCCGATATGTTCTGGAGAAGACATACAAGTTATTGAAGACATGCATCATGT  
CAGTGTGAAAAAAGATTTCCAAAGTCTTTATCATACAAGAGAAAAATAAAACACTGCAAGATA  
AGCATGCTGATTACCAGACAAATGGGGAAATTATATGCAAAGACTGTGGACAAGCTTGGGG  
AAATATGATGGTTCACCGAGGTCTTGACCTGCCTTGTCTAAAGATCAGAAATTTTGTGGTCG  
TGTTTGCAGACAAGAAAACAACAACAATATTTTAAAGAAATGGGGAGACCTGCCCATCAG  
GTTTCCTAGTTTTGATTATGCAGCTCATTGTCTTCAAGTGATGAAGAT

>sporophila\_hypoxantha-passeriformes-mda5

ATGGCAGAGGGCGCCCGGGACGAGCGGTTCTCTACATGATCTCCTGCTTCAGGCCGCG  
GCTGAAGCAGTTCATCCAGGTGCAGCCCGTGCTGGACCGGCTGCCCTCGCTAAGCGCGG  
AGGACCGGGACAGGGTGCGGGCGGCCGCCCTGCAGCGGGGCGCGGCGGGCGGCCG  
AGGAGCTGCTGCGGGCCGTGGAGCGGGGGCCCCGCGGCTGCGGCTGGATCCGCGAGTT  
CCTGCAGGCGCTGGAGCACGGCGGCTGCAGCCTGGCCGCTGCTACGCCAACCCAGC  
CTCAGCCAGCTGCCCTCGCCGGCAGAGGAGGCCGAGCACGACCTCTGCGTGACCTGGT  
GCAGCTGCTGCACGGCACGCTGGTGGACAAGATGCGCGCCGGGCAGGTGGCGGAGAAG  
TGCCTGCAGATGGGAATCTTCCAGGACGAGGACGTGGATCGGATCCAGACTGTTGCTGAC  
AATCGTGGGAACAGAGATGGTGCAAGGGAGCTACTGAGCAGAATAGTCCAGAAGAAAGAC

TGGTTCTCTTCTTTTTTATTGCTCTCCGTGAAACCCAACATGAAGACCTTGCAGATGATTT  
AAGTGGAATACAGGA-----  
GAGAATAAACAAAATGGGATGGAGCAGACTACGAATGAAGAAACAGAAATTACAAGCCAAC  
CAGGATACGTCATAGAGGAGAATTTGAAACAGGAAGAAAATGTGGATGATAGTTTCAGCAG  
TGAGAACAGTCTGTTGGAAACATCCATAGAAAAGAATTCTGTGATGTCAGAGTCAGATGTTT  
CCATAGGAGAKGGAAGTGTCACTAATTGAATGGAACTGG-----  
AGCTGCACAACCAAGTGAATCAGATGAAGTGGAG-----  
AGGAGAGCCTCACCTGAGCCAGATCTGACCCTGAGAGATTACCAGATGGAAGTTGCAAAG  
CCAGCATTGAATGGGGAGAATATTATCATATGTCTCCCTACAGGCAGTGGTAAAACCAGAG  
TGGCTGTTTACATTACCAAAGATCACTTGGATAAGAAAAAAGAGCATCAGAGCCTGGAAA  
AGTCATAGTACTTGTTAATAAGGTTCCATTGGTAGAACAGCATTAAAAAGAGAGTTTGGTC  
CATTCCTGAAGCGTTGGTATCAGGTTATTGGTTAAGTGGTGATTCTCAGCTGAAAATCTCA  
TTTCCTGAAGTTGTCAGAAGAAATGATGTCATCATCAGTACAGCACAGATCCTTGAGAATTC  
ACTGTTAAATGCCTCCAAGGAAGATGAAGAAAGTGTCCACTTATCAGATTTTCCCTCATCA  
TCATCGATGAGTGTATCATACTCAAAAGGAAGGTGTCTACAATAACATAATGAGACGTTAC  
TTAAAAGAAAAGATGAAGAACAGGAAGCTGGCAAAAGAAAACAAACCACTGATCCACAGC  
CTCAGATTCTGGGACTTACAGCCTCACCTGGTGTAGGAGGTGCAACATCCTACTCAAAAGC  
TGAAGAGCATATTCTGAAAATCTGTGCCAATCTTGATGCATGTAGAATTATGACTGTTGAAG  
AGCATGCCTCCAGCTAAAGAATCAGGTGAAGGAACCATCTAAGAACTGTGATTGCAGA  
TGATAAAAAAAGGGATCCATTTAAGAGAGAGACTCACTGAGATCATGACAGAAATACAAAAT  
ATTGCCAGCTGCATCCGAAGTCTGAGTTTGGAACTCAGACATATGAACAGTGGGTGATCAG  
AGAAGAGAGAAGAGCTGCRAAAGAAGAAAACGCAGGGAACGTGTCTGTGCAGAGCACTT  
GAAGAAATACAATGATGCTCTCCAGATAAATGACACCATCCGAATGGTGGATGCCTACAAT  
CACCTRAATAACTTCTATAAAGAGGAGAAAAGTAAGAAGACAGTAAGGAGTGATGATGATG  
ATGAGCCAGCAGTATCAAAACAGGATGAAACAGATGAATTTCTAATAGGTTTATTTTCATGCA  
AAAAAGAAACAGCTGAAAGAGTTGACTAGAAAGCCAGAAAATGAAAATGAGAAGCTAATGG  
AGTTGAGAAATACTTTAATGGAGGAGTTCACGAAGACTGAAGAACCTAGAGGAATCATTTT  
CACAAAGACTCGTCTAAGTGCTTTTGTCTTTTCCAGTGGATTAAGGACAACCCAAAATTTG  
AAGAAGTGGGWATTAAAGCCCATTATCTTATCGGCTCTGGACATAAGAGTGAAATGAAGCC  
CATGACTCAGAATGAGCAAAGGGAAGTTATTGATAAATTTGATGTGGAAGTGTAATTTAC  
TGATTGCTACTACTGTAGCTGAGGAAGGCCTGGACATCAAAGAGTGTAACATCGTTATTG  
CTACGGCCTTGTACCAATGAAATTGCTATGGTGCAGGCTCGTGGTAGAGCTCGAGCTGA  
TGAAAGCACCTATGCTCTTGTGGCTTCAAGTGGCTCAGGGGCTGTTGAACGTGAAAATGTT  
AATACTTTTCGTGAGAAAATGATGTATAAGGCCATTACGCGTGTCCAGAAGATGCCACAGG  
AAGAATATTTAAATAAGATTACAGAGTTTCCAGTTGCAAAGTGATGGAAGAAACAAATGAAG  
GTGGTGAGAGATCAGCGCAAGACATACAAGAAAAATCCTTCACTAATAAAATTCTTATGCAA  
AAATTGCTCCAAGCCGATATGTTCTGGAGAAGACATACAAGTTATTGAAGACATGCATCATG  
TCAGTGTGAAAAAAGATTTCAAAGTCTTTATCATACAAGAGAAAATAAAACACTACAAGAT  
AAGCACGCTGATTACCAGACAAATGGGGAAATTATATGCAAAGACTGTGGACAAGCTTGGG  
GAAATATGATGGTTCACCGAGGTCTTGACCTGCCTTGTCTAAAGATCAGAAATTTTGTGGTT  
GTGTTTGCAGACAAGAAACAACAACAATATTTTAAAGAAATGGGGAGACCTGCCCATCA  
GGTTTCCTAGTTTTGATTATGCAGCTCATTGTCCTTCAAGTGATGAAGAT  
>molothrus\_ater-passeriformes-mda5  
ATGGCAGAGGGCACCCGGGACGAGCAGTTCCTCTACATGATCTCCTGCTTCAGGCCGCG

GCTGAAGCAGTTCATCCAGGTGCAGCCCGTGCTGGACCGGCTGCCCTCGCTGAGCGCGG  
AGGACCGGGACAGGGTGCCTGCGGCCGCCCTGCAGCGGGGCGCGGCGGGCGGCCG  
AGGAGCTGCTGCGGGCCGTGGAGCGGGGGCCCCGCGGCTGCGGCTGGATCCGCGAGTT  
CCTGCAGGCGCTGGAGCACGGCGGCTGCAGCCTGGCCGCCTGCTACGCCAACCCAGC  
CTCAGCCAGCTGCCCTCGCCGGCAGAGGAGGCCGAGCATGACCTCTGCGTGCACCTGGT  
GCAGCTGCTGCACGGCACGCTGGTGGACAGGATGCGCGCCGGGCAGGTGGCCGAGAAG  
TGCCTGCAGATGGGAATCTTCCAGGACGAGGACGTGGATCGGATCCAGACTGTTACTGAC  
AATCATGGGAACAGAGATGGTGAAGGGAGCTACTGAGCAGAATAGTCCAAAAGAAAGAC  
TGGTTCTCTTCTTTTTTATTGCTCTCCGTGAAACCCAACATGAAGACCTTGCAGATGATTT  
AAGTGGAAATACAGGA-----  
GAGAATAAACCAAGTGGGATGGAGCAGACTATGAATGAAGAAACAGAAGTTACAAGACAAC  
CAGGATACGTCATACAGGAGAATTCGAAACAGGAAGAAAATGTGGATGATAGTTTCAGCAG  
TGAGAGCAGTCTGTTGAAACATCCATAGAAAAGAATTCTGTGATGACAGAGTCAGATGTC  
TCCATAGGAGATGAAAGTGTGAGTAAGTGAATGGAAGCCTGGAACAGAGCTGCACAACCA  
GTGATTGAGATGAAGTGGAG-----  
AAGAGAGACTCACCTGAGCCAGATCTGACCCTGAGAGATTACCAGATGGAAGTTGCAAAG  
CCAGCATTGAATGGGGAGAATATTATCATATGTCTCCCTACAGGCAGTGGTAAAACCAGAG  
TGGCTGTTTACATTACCAAAGATCACTTGGATAAGAAGAAAAGAGCATCAGAGCCTGGA  
AGTCATAGTACTTGTAAACAAGGTTCCATTGGTAGAACAGCATTTAAAAAGAGAGTTTGGTC  
CATTCTGAAGCGTTGGTATCAGGTTATTGGTTTAAAGTGGTGATTCTCAGCTGAAAATCTCA  
TTTCCTGAAGTTGTCAGAAGAAATGATGTCATCATCAGTACAGCACAGATCCTTGAGAATTC  
ACTGTTAAATGCATCCAAGGAAGATGAAGAAAGTGTCCACTTATCAGATTTTTCCCTCATCA  
TCATCGATGAGTGTGTCATCACTCAAAAGGAAGGTGTCTACAATAACATAATGAGACGTTAC  
TTAAAAGAAAAGATGAAGAACAGGAAGCTGGCAAAAGAAAACAAACCACTGATCCACAGC  
CTCAGATTCTGGGACTTACAGCCTCACCTGGTGTAGGAGGTGCAACATCCTACTCAAAAGC  
TGAAGAGCATATTCTGAAAATCTGTGCCAATCTTGATGCATGTAGAATTATGACTGTTGAAG  
AGCATGCCTCCCAGCTAAAGAATCAGGTGAAGGAGCCGTCTAAGAAGACTGTGATTGCAG  
ATGACAAAAAAGGGATCCATTTAAAGAGAGAACTCACTGAGATCATGACAGAAATACAGAG  
CTATTGCCAGCTGCATCCAAAGTCTGAGTTTGGAACTCAGACATATGAGCAGTGGGTGATC  
AGAGAAGAGAGAAGAGCTGCGAAAGAAGAAAAACGCAGGGAACGTGTCTGTGCAGAGCA  
CTTGAAGAAATACAATGATGCTCTCCAGATAAATGACACCATCCGAATGGTGGATGCCTAC  
AATCACCTAAATAACTTTTTATAAAGAGGAGAAAAGTAAGAAGACAGTAAGGAGTGATGATGA  
TGATGAACCAGCAGTATCAAAACAGGATGAAACAGATGAATTTCTAATAGGTTTATTCCATG  
CAAAAAAGAAACAGCTGAAAGAGTTGACTAGAAATCCAGAAAATGAAAATGAGAAGCTAAC  
AAAGTTGAGAAATACTTTAATGGAGGAGTTCACGAAGACTGAAGAACCTAGAGGAATCATT  
TTCACGAAGACTCGTCTAAGTGCCCTTTGCTCTTTACCAGTGGATTAAGGACAACCCAAAATT  
TGAAGAAGTGGGAATTAAGGCCCATCATCTTATCGGCTCTGGACATAAGAGTGAAACGAAG  
CCGATGACTCAGAATGAGCAAAGGGAAATTATTGATAAATTTGATGTGGAAATGTAAATTT  
ACTAATTGCTACTACTGTAGCTGAGGAAGGCCTGGACATCAAAGAGTGTAACATCGTTATT  
CGCTATGGCCTCGTCACCAATGAAATTGCTATGGTGCAGGCTCGTGGTAGAGCTCGAGCT  
GATGAAAGCACCTATGCTCTTGTGGCTTCAAGTGGCTCAGGGGCTGTTGAACGTGAAAATG  
TTAATATTTTTCTGTGAGAAAATGATGTATAAGGCCATTGAGCGTGTCCAGAAGATGCCACAG  
GAAGAGTATTTAAATAAGATTGAGGGTTTCCAGTTGCAAAGTATAGTGAAAAACAAATGAA  
GGTGGTGAGAGATCAGCGCAAGACATACAAGAAAAATCCTTCACTAATAAAATTCTTATGCA

AAAATTGCTCCAAGCCGATATGTTCTGGAGAAGACATACAAGTTATTGAAGACATGCATCAT  
GTCAGTGTGAAAAAAGATTTCCAAAGTCTTTATCATACAAGAGAAAATAAAACACTGCAAGA  
TAAGCATGCTGATTACCAGACAAATGGGGAAATTATATGCAAAGACTGTGGGCAAGCTTGG  
GGAAATATGATGGTTCACCGAGGTCTTGACCTGCCTTGTCTAAAGATCAGAAATTTTGTGG  
TTGTGTTTGCAGACAAGAAAACAACAAACAATATTTTTAAGAAATGGGGAGACCTGCCCATC  
AGGTTTCCTAGTTTTGATTATGCAGCTCATTGTCCTTCAAGTGATGAAGAT

>geothlypis\_trichas-passeriformes-mda5

ATGGCAGAGGGCACCCGGGACGAGCGGTTCTCTACATGATCTCCTGCTTCAGGCCGCG  
GCTGAAGCAGTACATCCAGGTGCAGCCCGTGCTGGACCGGCTGCCCTCGCTGAGCGCGG  
AGGACCGGGACAGGGTGCGTGCGGCCGCCCTGCAGCGGGGCGCGGCGGGCGGCCG  
AGGAGCTGCTGCGGGCCGTGGAGCGGGGGCCCCGCGGCTGCGGCTGGATCCGCGAGTT  
CCTGCAGGCGCTGGAGCACGGCGGCTGCAGCCTGGCCGCTGCTACGCCAACCCAGC  
CTCAGCCAGCTGCCCTCGCCGGCAGAGGAGGCCGAGCATGACCTCTGCGTGACCTGGT  
GCAGCTGCTGCACGGCACGCTGGTGGACAGGATGCGCGCCGAGCAGGTGGCCGAGAAG  
TGCCTGCAGATGGGAATCTTCCAGGACGAGGACGTGGATCGGATCCAGACTGTTACTGAC  
AATCGTGGGAACAGAGATGGTGCAAGGGAGCTACTGAGCAGAATAGTCCAGAAGAAAGAC  
TGGTTCTCTTCTTTTTGATTGCTCTCCGTGAAACCCAACATGAAGACCTTGCAGATGATTT  
AAGTGGAATACAGCA-----

GAGAATAAACAAAGTGGGATGGAGCAGACTACGAATGAAGAAACAGAAGTTACAAGCCAA  
CCAGGATACGTCATAGAGGAGAATTTGAAACAGGAAGAAAATGTGAATGATAGTTTCAGCA  
GTGAGAACAGTCTGTTGGAAACATCCATAGAAAAGAATTCTGTGATGGCAGACTCAGATGT  
CTCCATAGGAGATGGAAGTGTCAGTAACCTGAATGGAAACCTGGAACAGAGCTGCACAAC  
CAGTGATTCAGATGAAGTTGAG-----

AGGAGAGCCTCACCTGAGCCAGATCTGACCCTGAGAGATTACCAGATGGAAGTTGCAAAG  
CCAGCATTGAATGGGGAGAATATTATCATATGTCTCCCTACAGGCAGTGGTAAAACAGAG  
TGGCTGTTTACATTACCAAAGATCACTTGGATAAGAAGAAAAGAGCATCAGAGCCTGGAAA  
AGTCATAGTACTTGTTAATAAGGTTCCATTGGTAGAGCAGCATTTAAAAAGAGAGTTTAGTC  
CATTCTGAAGCGCTGGTATCAGGTTATTGGTTAAGTGGTGATTCTCAGCTGAAAATCTCA  
TTTCCTGAAGTTGTCAGAAGAAATGATGTCATCATCAGTACAGCACAGATCCTTGAGAATTC  
ACTGTTAAATGGGTCCAAGGAAGATGAAGAAAGTGTCCACTTATCAGATTTTTCCCTCATCA  
TCATCGATGAGTGTCATCACTCAAAAGGAAGGTGTCTACAATAACATAATGCGACGTTAC  
TTAAAAGAAAAGATGAAGAACAGGAAGCTGGCAAAAGAAAACAAACCACTGATCCCACAGC  
CTCAGATTCTGGGACTTACAGCCTCACCTGGTGTAGGAGGTGCAACATCCTACTCAAAGC  
TGAAGAGCATATTCTGAAAATCTGTGCCAATCTTGATGCATGTAGAATTATGACTGTTGAAG  
AGCATGCCTCCCAGCTAAAGAATCAGGTGAAGGAACCGTCTAAGAAGACTGTGATTGCAG  
ATGACAAAAAAGGGATCCATTTAAAGAGAGAATCACTGAGATCATGACAGAAATACAGAA  
CTATTGCCAGCTGCATCCAAAGTCTGAGTTTGGAACTCAGACATATGAACAGTGGGTGATC  
AGAGAAGAGAGAAGAGCTGCGAAAGAAGAAAAACGCAGGGAACGTGTCTGTGCAGAGCA  
CTTGAAGAAATACAATGATGCTCTCCAGATAAATGACACCATCCGAATGGTGGATGCCTAC  
AATCACCTAAATAACTTTTATAAAGAGGAGAAAAGTAAGAAGACAGTAAGGAGTGATGATGA  
TGATGAACCAGCAGTATCAAAACAGGATGAAACAGATGAATTTCTAATAGGTTTATTTTCATG  
AAAAAAGAAAACAGCTGAAAGAGTTGACTAGAAAGCCAGAAAATGAAAATGAGAAGCTAAC  
GAAGTTGAGAAATACTTTAATGGAGGAGTTCACAAAGATTGAAGAACCTCGAGGAATCATTT  
TCACAAAGACTCGTCTAAGTGCCCTTGTCTTTTCCAGTGGATTAAGGACAACCCAAAATTT

GAAGAAGTGGGAATTAAGGCCATTATCTTATCGGCTCTGGACATAAGAGTGAAATGAAGC  
CCATGACTCAGAATGAGCAAAGGGAAATTATTGATAAATTTGATGTGGAAATGTAAATTTA  
CTAATTGCTACTACTGTAGCTGAGGAAGGCCTGGACATCAAAGAGTGTAACATCGTTATTC  
GCTATGGCCTCGTCACCAATGAAATTGCTATGGTGCAGGCTCGTGGTAGAGCTCGAGCTG  
ATGAAAGCACCTATGCTCTTGTGGCTTCAAGTGGTTCAGGGGCTGTTGAACGTGAAAATGT  
TAATATTTTTTCGTGAGAAAATGATGTATAAGGCCATTGACGTGTCCAGAAGATGCCACAG  
GAAGAGTATTTAAATAAGATTGAGAGTTTCCAGTTGCAAAGTATAGTGGA AAAACAAATGAA  
GGTGGTGAGAGATCAGCGCAAGACATACAAGAAAAATCCTTCACTAATAAAATTCTTATGCA  
AAAATTGCTCCAAGCCGATATGTTCTGGAGAAGACATACAAGTTATTGAAGACATGCATCAT  
GTCAGTGTGAAAAAAGATTTTCAAAGTCTTTATCATACAAGAGAAAAATAAAACACTGCAAGA  
TAAGCATGCTGATTACCAGACAAATGGGGAAATTATATGCAAAGACTGTGGACAAGCTTGG  
GGAAATATGATGGTTCACCGAGGTCTTGACCTGCCTTGTCTAAAGATCAGAAATTTTGTGG  
TTGTGTTTGCAGACAAGAAAAACAACAACAATATTTTAAAGAAATGGGGAGACCTGCCCATC  
AGGTTTCCTAGTTTTGATTATGCAGCTCATTTTCCTTCAAGTGATGAAGAT

>setophaga\_coronata-passeriformes-md5

ATGGCAGAGGGCACCCGGGACGCGCGGTTCTCTACATGATCTCCTGCTTCAGGCCGCG  
GCTGAAGCAGTACATCCAGGTGCAGCCCGTGTGGACCGGCTGCCCTCGCTGAGCGCGG  
AGGACCGGGACAGGGTGCGTGC GGCCCGCCCTGCAGCGGGGCGCGGCGGCGGCGCGCG  
AGGAGCTGCTGCGGGCCGTGGAGCGGGGGCCCCGCGGCTGCGGCTGGATCCGCGAGTT  
CCTGCAGGCGCTGGAGCACAGCGGCTGCAGCTTGCCGTCTGCTACGCCAACCCAGCC  
TCAGCCAGCTGCCCTCGCCGGCAGAGGAGGCCGAGCATGACCTCTGCGTGCACCTGGTG  
CAGCTGCTGCACGGCACGCTGGTGGACAGGATGCGCGCCGGGCAGGTGGCCGAGAAGT  
GCCTGCAGATGGGAATCTTCCAGGACGAGGACGTGGATCGGATCCAGACTGTTACTGACA  
ATCGTGGAACAGAGATGGTGCAAGGGAGCTACTGAGCAGAATAGTCCAGAAGAAAGACT  
GGTTCTCTTCTTTTTTGATTGCTCTCCGTGAAACCCAACATGAAGACCTTGCAGATGATTTA  
AGTGGAATAACAGGA-----

GAGAATAAACAAAGTGGGATGGAGCAGACTACGAATGAAGAAACAGAAGTTACAAGCCAA  
CCAGGATACGTCATAGAGGAGAATTTGAAACAGGAAGAAAATGTGGATGATAGTTTCAGCA  
GTGAGAACAGTCTGTTGGAAACATCTATAGAAAAGAATTCTGTGATGGCAGACTCAGATGT  
CTCCATAGGAGATGGAAGTGTGAGTAACCTGAATGGAACCTGGAACAGAGTTGCACAACC  
AGTGATTCAGATGAAGTTGAG-----

AGGAGAGCCTCACCTGAGCCAGATCTGACCCTGAGAGATTACCAGATGGAAGTTGCAAAG  
CCAGCATTGAATGGGGAGAATATTATCATATGTCTCCCTACAGGCAGTGGTAAAACGAGAG  
TGGCTGTTTACATTACCAAAGATCACTTGGATAAGAAGAAAAGAGCATCAGAGCCTGGAAA  
AGTCATAGTACTTGTTAATAAGGTTCCATTGGTAGAGCAGCATTTAAAAAGAGAGTTTATTC  
CATTCCTGAAGCGCTGGTATCAGGTTATTGGTTAAGTGGTGATTCTCAGCTGAAAATCTCA  
TTTCCTGAAGTTGTCAGAAGAAATGATGTCATCATCAGTACAGCACAGATCCTTGAGAATTC  
ACTGTTAAATGGATCCAAGGAAGATGAAGAAAGTGTCCACTTATCAGATTTTTCCCTCATCA  
TCATCGATGAGTGTATCATACTCAAAGGAAGGTGTCTACAATAACATAATGCGACGTTAC  
TTAAAGAAAAGATGAAGAACAGGAAGCTGGCAAAAAGAAAACAAACCACTGATCCACAGC  
CTCAGATTCTGGGACTTACAGCCTCACCTGGTGTAGGAGGTGCAACATCCTACTCAAAGC  
TGAAGAGCATATTCTGAAAATCTGTGCCAATCTTGATGCATGTAGAATTATGACTGTTGAAG  
AGCATGCCTCCAGCTAAAGAATCAGGTGAAGGAACCGTCTAAGAAGACTGTGATTGCAG  
ATGACAAAAAAGGGATCCATTTAAAGAGAGAATCACTGAGATCATGACAGAAATACAGAA

CTATTGCCAGCTGCATCCAAAGTCTGAGTTTGGAACCTCAGACATATGAACAGTGGGTGATC  
AGAGAAGAGAGAAGAGCTGCGAAAGAAGAAAAACGCAGGGAACGTGTCTGTGCAGAACAC  
TTGAAGAAATACAATGATGCTCTCCAGATAAATGACACCATCCGAATGGTGGATGCCTACA  
ATCACCTAAATAACTTTTATAAAGAGGAGAGAAAAGTAAGAAGACAGTAAGGAGTGATGATGAT  
GATGAACCAGCAGTATCAAAACAGGATGAAACAGATGAATTTCTAATAGGTTTATTTACACGC  
AAAAAAGAAACAGCTGAAAGAGTTGACTAGAAAGCCAGAAAATGAAAATGAGAAGCTAACG  
AAGTTGAGAAATACTTTAATGGAGGAGTTTCAAAAGACTGAAGAACCTCGAGGAATCATTTT  
CACAAAGACTCGTCTAAGTGCCTTTGCTCTTTTCCAGTGGATAAAGGACAACCCAAAATTTG  
AAGAAGTGGGAATTAAGGCCCATTAATCTTATTGGCTCTGGACATAAGAGTGAAATGAAGCC  
CATGACTCAGAATGAGCAAAGGGAAATTATTGACAAATTTTCGATGTGGAAATGTAAATTTAC  
TAATTGCTACTACTGTAGCTGAGGAAGGCCTGGACATCAAAGAGTGTAACATCGTTATTTCG  
CTATGGCCTCGTCACCAATGAAATTGCTATGGTGCAGGCTCGTGGTAGAGCTCGAGCTGA  
TGAAAGCACCTATGCTCTTGTGGCTTCAAGTGGCTCAGGGGCTGTTGAACGTGAAAATGTT  
AATATTTTTTCGTGAGAAAATGATGTATAAGGCCATTGAGCGTGTCCAGAAGATGCCACAGG  
AAGAGTATTTAAATAAGATTCAGAGTTTCCAGTTGCAAAGTATAGTGGAACAAACAAATGAAG  
GTGGTGAGAGATCAGCGCAAGACATACAAGAAAAATCCTTCACTAATAAAATTCTTATGCAA  
AAATTGCTCCAAGCCGATATGTTCTGGAGAAGACATACAAGTTATTGAAGACATGCATCATG  
TCAGTGTGAAAAAAGATTTTCAAAGTCTTTATCATAACAAGAGAAAAATAAAACACTGCAAGAT  
AAGCATGCTGATTACCAACAAATGGCGAAATTATATGCAAAGACTGTGGACAAGCTTGGG  
GAAATATGATGGTTCACCGAGGTCTTGACCTGCCTTGTCTAAAGATCAGAAATTTTGTGGTT  
GTGTTTGCAGACAAGAAAACAACAAACAATATTTTTAAGAAATGGGGAGACCTGCCCATCA  
GGTTTCCTAGTTTTGATTATGCAGCTCATTGTCCTTCAAGTGATGAAGAT

>hemignathus\_wilsoni-passeriformes-mda5

ATGGCAGAGGGGCACCCGGGACGAGCTGTTTCTCTACATGATCTCCTGCTTCAGGCCGCGG  
CTGAAGCAGTTCATCCAGGTGCAGCCCGTGTTGGACCGGCTCCCCTCGCTGAGCGCGGA  
GGACAAGGACAGGGTGCGTGCGGCCGCCCTGCAGAGGGGCGCGGCTGCGGGCGCGGA  
GGAGCTGCTGCTGGCCGTGGAGCGGGGGCCCCGCGGCTGCGGCCCGATCCGCGAGTTC  
CTGCAGGCGCTGGAGCACGGCGGCTGCAGCCTGGCCGCTGCTACGCCAACCCAGCCT  
GAGCCAGCTGCCCTCGCCAGAAGAGGAGGCCGAGCACGACCTCTGCGTGCACCTGGTGC  
AGCTGCTGCACGGCACGCTGGTGGACAGGATGCGCACCGTGAGGTGGCCGACAAGTGC  
CTGCAGATGGGAATCTTCCAGGACGAGGACGTGGATCGGATCCAGACTGTTACTGACAAT  
CGTGGGAACAGAGATGGTGCAAGGGAGCTACTGAGCAGAATAGTCCAGAAGAAATACTGG  
TTCTCTTCTTTTTTGGTTGCTCTCCGTGAAACGCAACATGAAGACCTTGCAGATGATTTAAG  
TGGAATACAGGA-----

GAGAATAAAGAAAATGGGATGGAGCAGACTACGAACGAAGAAACAGAAGTTACAAGCCAA  
CCAGGATACATCATAGAGGAGAATTTGAAACAGGAAGAAAATGTGGAGGATAGTTTCAGCA  
GTGAGAGCAGTCTGTTGGAAACATCCATAGAAAAGAATTCTGTGATGTCAGAGTCAGATGT  
CTCCACAGGAGAGGGAAGTGTGAGTAACCTGAACGGAAACCTGGAGGAGAGCTGCACAAC  
CAGTGATTCAGATGAAGTTGAG-----

AGGAGAGCCTCACCTGAACCAGATCTGACTCTGAGAGATTACCAGATGGAAGTTGCAAAG  
CCAGCCTTGAATGGGGAGAATATTATCATATGTCTTCTACAGGCAGTGGTAAAACCAGAG  
TGGCTGTTTACATTACCAAAGATCACTTGGATAAGAAAAAAGAGCATCAGAGCCTGGAAA  
AGTCATAGTACTTGTAAACAAGGTTCCATTGGTAGAACAGCATTTAAAAAGAGAGTTTAGTC  
CATTCCTGAAGCATTGGTATCAGGTTATTGGTTTAAGTGGTGATTCTCAGCTGAAAATCTCA

TTTCCTGAAGTTGTCAGAAGAAATGATGTCATCATAAGTACAGCACAGATCCTTGAGAATTC  
ACTGTTAAATGCATCCAAAGAAGATGAAGAAAGTGTCTACTTATCAGATTTTTCCCTCATCA  
TCATCGATGAGTGCCATCACACTCAAAGGAAGGTGTCTACAATAATATAATGAGACGTTAC  
TTAAAAGAAAAGATGAAGAACAGGAAGCTGGCAAAAGAAAACAAACCACTGATCCACAGC  
CTCAGATTCTGGGACTTACAGCCTCACCTGGTGTAGGAGGTGCAACATCCTACTCAAAGC  
TGAAGAGCATATTCTGAAAATCTGTGCCAATCTTGATGCATGTAGAATTATGACTGTTGAAG  
AGCATGCCTCCCAGCTAACGAATCAGGTGAAGGAACCGTCTAAGAAAACCTGTGATTGCAGA  
TGATAAAAAAAGGGATCCATTTAAAGAAAAAATTACTGAGATCATGACAGAAATACAAAAC  
ATTGCCAGCTGCATCCGAAGTCTGAGTTTGGAACTCAGACATATGAACAGTGGGTGATCAG  
AGAAGAGAGAAGAGCTGCGAAAGAAGAAAAACGCAGGGAACGTGTCTGTGCAGAGCACTT  
GAAGAAATACAATGATGCTCTCCAGATAAATGACACCATCCGAATGGTGGATGCCTACAAT  
CACCTAAATAACTTCTATAAAGAGGAGAAAAAGTAAGAAGACAGTAAGGAGTGATGATGATG  
ATGAACCAGCAGTATCAAAACAGGATGAAACAGATGAATTTCTAATAGGTTTATTTACGCA  
AAAAATAAACAGCTGAAAGAGTTGACTACAAAGCCAGAAAATGAAAATGAGAAGCTAACGA  
AGTTGAGAAATACTTTAATGGAGGAGTTCACGAAGACTGAAGAACCTCGAGGAATCATTTT  
CACAAAGACTCGTCTAAGTGCCTTTGCTCTATTCCAGTGGATTAAGGACAACCCAAAATTTG  
AAGAAGTGGGAATTAAGGCCCATTTATCTTATCGGCTCTGGACACAAGAGTGAAATGAAGCC  
CATGACTCAGAATGAGCAAAGGGAAGTTATTGATAAATTTGATGTGGAAATGTAAATTTAC  
TAATTGCTACTACTGTAGCTGAGGAAGGCCTGGACATCAAAGAGTGTAACATCGTTATTG  
CTATGGCCTCGTCACCAATGAAATTGCTATGGTGCAGGCTCGTGGTAGAGCTCGAGCTGA  
TGAAAGCACCTATGCTCTTGTGGTTTCAAGTGGCTCAGGGGCTGTTGAACGTGAAAATGTT  
AATATTTTTCTGTGAGAAAATGATGTATAAGGCCATTGAGCGTGTCCAGAAGATGCCACAGG  
AAGAGTATTTAAAGAAGATTCAGAGTTTCCAGTTGCAAAGTATAGTGGAAAAACAAATGAAG  
GTGGTGAGACATCAGCGCAAGACATACAAGAAAAATCCTTCACTAATAAAATTCTTATGCAA  
AAATTGCTCCAAGCCGATATGTTCTGGAGAAGACATACAAGTTATTGAAGGCATGCATCAT  
GTCAGTGTGAAAAAAGATTTCCAAAGTCTTTATCATACAAGAGAAAATAAAACGCTGCAAGA  
TAAGCATGCTGATTACCAGACAAATTGGGAAATTATATGCAAAGACTGTGGACAAGCTTGG  
GGAAATATGATGGTTACCGAGGTCTTGACCTGCCTTGTCTAAAGATCAGAAATTTTGTGG  
TTGTGTTTGCAGACAAGAAAACGACAAACAATATTTTTAAGAAATGGGGAGACCTGCCCAT  
CAGTTTTCTAGTTTTGATTATGCAGCTCATTGTCCTTCAAGTGATGAAGAT

>serinus\_canaria-passeriformes-mda5

ATGGCAGAGGGCACCCGGGACGAGCGGTTCTCTACATGATCTCCTGCTTCAGGCCGCG  
GCTGAAGCAGTTCATCCAGGTGCAGCCCGTGCTGGACCGGCTCCCCTCGCTGAGCGCGG  
AGGACAAGGACAGGGTGCGTGCGGCCGCCCTGCAGGGGGGCGCGGCGGCGGGCGCGG  
AGGAGCTGCTGCGGGCCGTGGAGCGGGGGCCCCGCGGCTGCGGCTGGATCCGCGAGTT  
CCTGCAGGCGCTGGAGCATGGAGGCTGCAGCCTGGCCGTCTGCTACGCCAACCCCAGCC  
TGAGCCAGCTGCCCTCGCCGGAAGAGGAGGCCGAGCACGACCTCTGCGTGCACCTGGTG  
CAGCTGCTGCACGGCACGCTGGTGGACAGGATGCGCACCGTGCAGGTGGCCGAGAAGTG  
CCTGCAGATGGGAATCTTCCAGGACGAGGACGTGGATCGGATCCAGACTGTTACTGACAA  
TCGTGGGAACAGGGATGGTGCAAGGGAGCTACTGAGCAGAATAGTCCAGAAGAAAGACTG  
GTTCTCGTCTTTTTTGGTTGCTCTCCGTGAAACGCAACATGAAGACCTTGCCGATGATTAA  
GTGGAAATACAGGA-----

GAGAATAAAGAAAATGGGATGGAGCAGACTACGAATGAAGAAACAGAAGTTCCAAGCCAA  
CCAGGATACGTCACAGAGGAGAATTTGAAACAGGAAGAAAATGTGGATGATAGTTTCAGCA



GTGAGAGCAGTCTGTTGGAAACATCCATAGAAAAGAATTCTGTGATGTCAGAGTCAGATGT  
CTCCATAGGAGATGGAAGTGTGAGTAACTTGAAGGGAAACCTGGAAGAGAGTTGCACAAC  
CAGTGATTCAGATGAAGTGGAG-----

AGGAGAGCCTCACCTGAACCAGATCTGACCCTGAGAGATTACCAGATGGAAGTTGCAAAG  
CCAGCCTTGAATGGGGAGAATATTATCATTGTCTCCCTACAGGCAGTGGTAAAACCAGAG  
TGGCTGTTTACATTACCAAAGATCACTTGGATAAGAAAAAAGAGCATCAGAGCCTGGAAA  
AGTCATAGTACTTGTAAACAAGGTTCCATTGGTAGAACAGCATTTAAAAAGAGAGTTTAGTC  
CATTCCTGAAGCGTTGGTATCAGGTTATTGGTTTAAGTGGTATTCTCAGCTGAAAATCTCA  
TTTCCTGAAGTTGTGAGAAGAAATGATGTCATCATAAGTACAGCACAGATCCTTGAGAATTC  
ACTGTTAAATGCGTCCAAGGAAGATGAAGAAAGTGTCCACTTATCAGATTTTTCCCTCATCA  
TCATCGATGAGTGTATCACACTCAAAGGAAGGTGTCTACAATAATATAATGAGACGTTAC  
TTAAACAAAAAAGAAGAACGTGAAGCTGGCAAAAGAAAAACAAACCACTGATCCACAGC  
CTCAGATTCTGGGACTTACAGCCTCACCTGGTGTAGGAGGTGCAACATCCTACTCAAAGC  
TGAAGAGCATATTCTGAAAATCTGTGCCAATCTTGATGCATGTAGAATTATGACTGTTGAAG  
AGCATGCCTCCCAGCTAAAGAATCAGGTGAAGGAACCATCTAAGAAAATTGTGATTGCAGA  
TGATAAAAAAAGGGATCCATTTAAAGAGAAAATTACTGAGATCATGACAGAAATACAAAAC  
ATTGCCAGCTGCATCCGAAGTCTGAGTTTGGAACTCAGACATATGAACAGTGGGTGATCAG  
AGAAGAGAGAAGAGCTGCGAAAGAAGAAAAACGCAGGGAACGTGTCTGTGCAGAGCACTT  
GAAGAAATACAACGATGCTCTCCAGATAAATGACACCATCCGAATGGTGGATGCCTACAAT  
CACCTAAATAACTTCTATAAAGAGGAGAAAAAGTAAGAAGACAGTAAGGAGTGATGATGATG  
ATGAACCAGCAGTATCAAACAGGATGAAACAGATGAATTTCTAATAGGTTTATTTTCATGCA  
AAAAAGAAACAGCTGAAAGAGTTGACTACAAAGCCAGAAAATGAAAATGAGAAGCTAACGA  
AGTTGAGAAATACTTTAATGGAGGAGTTCACAAAGACTGAAGAGCCTCGAGGAATCATTTT  
CACAAAGACTCGTCTAAGTGCCTTTGCTCTATTCCAGTGGATTAAGGAAAACCCAAAATTTG  
AAGAAGTGGGAATCAAGGCCATTATCTTATCGGCTCTGGACACAAGAGTGAAATGAAGCC  
CATGACTCAGAATGAGCAAAGGGAAGTTATTGATAGATTTTCGATGTGGAAATGTAAATTTGC  
TAATTGCTACTACTGTAGCTGAGGAAGGCCTGGACATCAAAGAGTGTAACATCGTTATTCCG  
CTATGGCCTCGTCACCAATGAAATTGCTATGGTGCAGGCTCGTGGTAGAGCTCGAGCTGA  
TGAAAGCACCTATGCTCTTGTGGTTTCAAGTGGCTCAGGGGCTGTTGAACATGAAAATGTT  
AATATTTTTTCGTGAGAAAATGATGTATAAGGCCATTACAGCGTGCCAGAAGATGCCACAGG  
AAGAGTATTTAAAAAAGATTCAGAGTTTCCAGTCGCAAAGTATAGTGGA AAAACAAATGAAG  
GTGATGAGAGATCAGCGCAAGACATACAAGAAAAATCCTTCACTAATAAAATTCTTATGCAA  
AAATTGCTCCAAGCCGATATGTTCTGGAGAAGACATACAAGTTATTGAAGACATGCATCATG  
TCAGTGTGAAAAAAGATTTCCAAAGTCTTATCATACAAGAGAAAAATAAATCACTGCAAGAT  
AAGCGTGCTGATTACCCGACAAATGGGGAAATTATATGCAAAGACTGTGGACAAGCTTGGG  
GACATATGATGGTTCACCGAGGTCTTGACCTACCTTGTCTGAAGATCAGAAATTTTGTGGTT  
GTGTTTGCAGACAAGAAATCAACGAACAATATTTTAAAGAAATGGGGAGAGCTGCCCATCA  
GGTTTCCTAGTTTTGATTATGCAGCTCACTGTCCTTCAAGTGATGAAGAT

>aerodramus\_maximus-apodiformes-mda5

ATGGCTGAGGAGTCCCGAGACCAGCGCTTCCTCTACATGATCTCCTGCTTCAGGCCGCGG  
TTGAAGCAGTTCATCCGGGTGCAGCCGGTGTCTGGACCGGCTTCCTCGCTGAGAGCAGC  
GGAGAAGGAGAAGGTGCGGGCGGCCGCCCTGCAGCGGGGCGAGGTGGAAGGGGCGGA  
GGAGCTGCTGCGGGCCGTGGAGCAGGGGCCCCACGGCTGCGGCTGGTTCCACGAGTTT  
CTGCAGGCGCTGGAGCAGAGTGGCTGCAGTCTGGCCGCCAGCTATGTGAACCCGAGCCT

TAGCCAGCTCCCCTCACCTGCTCAGGAGGCTGACCATGACCTCTGCGTGCACTTGGTGCA  
GTTGCTTCACAGCACACTGGTGGACAGAATGCAGACCATGCAAGTGGCCGAGCAGTGCCT  
GCAGATGGGCATCTTCCAGGACGAGGACCTGGATCGGATCCAGACTGTTACTGACAATCG  
TGGGAATAGAGAAGGTGCAAGGGAGCTGTTGAGCAGAATAGTGCAGAAGAAAGATTGGTT  
CTCTCCGTTTTTGACTGCTCTGCGTGACACCCAACATGGACACCTTGCAGATGATTTAAGT  
GGAAATACAAGAGGAAYGGAAAATGGACAAAATGGGATAAAGAACAGTACAAACGAAGAAA  
CAGAAGCTACAAGCCAACCTGGGATATGCTGTTGTGGAGGATTTGAAACAGCAAGAAAAAGT  
GAATGATAATTTTACAGCAGTGAAAACAGTGTATTGGAAACATCTATTGGACAGAATTCTGTCA  
TTTCAGAGTCAGATGTCTCCATAGGAAATGAAAGTGTTAACAACCTTGAATGAAAACCTGGGA  
CAGAGCTGCACAACCAGTGATTCAGATGGAGATGAAGTGGAGAGCAGAGCTTCACCTGAG  
TCAGATGTGATCCTGAGAGATTACCAGATGGAAGTTGCAAAGCCAGCACTGAATGGAGAG  
AATATTATAATATGTCTCCCTACAGGCAGCGGTAAAACCAGAGTGGCTGTTTACATTACCAA  
AGATCACTTGGATAAGAAGAAAAGAGCATCAGAGCCTGGAAAAGTTATAGTACTTGTTAATA  
AGGTACCATTGGTAGAACAGCATTTACGAAAGGAGTTTCATCCATTCTGAAGCCATGGTA  
TCAGGTTATTGGTTTAAGTGGTGATTCTCAGCTGAAAATCTCGTTTCCTGAAGTTGTCAAAA  
AAAATGATGTAATMATCTGTACAGCACAGATCCTTGAGAATTCAGTGTAAATGCAGGAGAA  
GAAGATGAAGAAGGTGTCCACTTATCAGACTTTTCGCTCATCATTATCGATGAGTGTATCA  
CACTCAAAAGGAAGGTGTCTACAACAATATAATGCGACGTTACTTAAAAGAAAAAATGAAGA  
ACAAGAAGCTGGCAAAAGAAAACAAACCACTGATCCCACAGCCTCAGATTCTGGGACTTAC  
AGCTTCACCTGGTGTAGGAGGTGCAACATCCTATTCAAAGCTGAAGAACATATTCTGAAA  
ATCTGTGCCAATCTTGATGCATGTAGAATTATGACTGTTGAAGAGCATGCCTCCCAACTGAA  
GAATCAGGTGAAGGAACCATATAAGAAGACTGTGATTGCAGATGACAAAAGAATTGATCCA  
TTTAGAGAGAAAATTACTGAGATCATGACAGTCATTCAAACCTATTGCCAGCTCTATCCAAA  
ATCTGAGTTTGGAACTCAGCCATAYGAACAGTGGGTGATTAAGAAGAGAGAAAAGCTGCA  
AAAGAAGAAAAACGCAGGGGACGTGTCTGTGCAGAGCACTTGAAGAAATACAATGATGCT  
CTCCAGATAAATGACACCATCCGAATGGTGGATGCATACAATCACATAAACAACCTTCTACAA  
GGAAGAGAAAAAAGAAGACAGTAAGGAGTGATGATGATGAAGAACCAGCAGTATCAAAA  
CAGGATGAAACAGATAAATTTCTAATAGGTTTATTTTCATGCAAATAAGGAACAGCTGAAAGA  
GTTGGCTAGAAAGCCGGAATATGAAAACGAGAAGCTGATACAGTTGCGAAACACTTTAATG  
GAGGAGTTCACAAAGACTGAGGAACCCAGAGGAATCATTTTCACAAAGACTCGGCTAAGTG  
CCTTTGCTCTATTCCAGTGGATTAAGGATAACCCAAAATTGGAAGAAGTGGGAATTAAGGC  
CCATTATCTTATTGGTGCTGGACATAACAGTGAAACAAAACCCATGACTCAGAACGAACAG  
AGAGAAGTTATTGATAAATTCCGAGGTGGAATGTGAATTTACTTATTGCTACTACTGTTGC  
TGAGGAAGGGCTAGACATCAAAGAGTGTAACATCGTTATTGCTATGGCCTCGTCACCAAT  
GAAATTGCTATGATGCAGGCTCGTGGTGCAGCTCGAGCTGATGAGAGTACCTATGCACTT  
GTGGCTTCGATTGGCTCAAGAGCTATTGAACGTGAAGATGTTAATCTTTACCGTGAGAAAA  
TGATGTATAAGGCCATTGAGCGTGTCCAGAAGATGCCACAGCAAGAGTATTTAAATAAGAT  
TCAGAATTTCCAGTTACAAAGTCTAGTGGAAAAAGAAATGAAAGCAAAACGAGATCAGTACA  
AGAAATACAAGAAAAATCCTTCACTAATAACATTCTATGCAAAAATTGCCACAAGCTGGTA  
TGTTCTGGAGAAGACATACAAGTTATTGAAAACATGCATCATGTCAGTGTAAAAAAGATTT  
CCAAAGTCTTTACCATACAAGAGAAAATAAGACACTGCAAGATAAGGATGCCGATTACCAG  
ATAAATGGGGAAATTATATGTAAAGATTGTGGACAAGCATGGGGAAATATGATGGTTCCACC  
GAGGTCTTGACCTGCCTTGTCTAAAGATTAAAAATTTTGTGGTTGTGTTTGGAGACAAGAAA  
ACAACGAAGGGTATCTATAAGAAATGGGGAGATCTGCCATTGGGTCCCTAGTTTTGATT

ATGCAGCTCATTGTCCTTCAGGATATGAAGAC

>empidonax\_traillii-passeriformes-mda5

ATGGAAGAGGGGGACCGGGACGAGCAGTTCTCTACATGATCTCCTGCTTCAGGCCGCG  
GCTGAAGCAGTTCATCCAGGTGCAGCCCGTGCTGGACCAGCTCCCCTCGCTGAGCGCGG  
AGGAGAGGGAGAAGGTGCGGGCGGCCGTCTGCAGCGGGGCGAGGTGGCGGGGGCCG  
AGGAGCTGCTGCGGGCCGTGGAGCGGGGACCCCGCGGCTGCGGCTGGTTCCACGAGTT  
CCTGCAGGCGCTGGAGCACGGCGGCTGTAGCCTGGCCGCCTGCTACGCCAACCCAGCC  
TCAGCCAGCTGCCCTCGCCGGCCGAGGAGGCCGACCACGACCTCTGCGTGACCTGGTA  
CAGCTGCTCCACAGCGCGCTGGTGGACAGGATGCAGCCCGTGAGGTGGCCGAGAAGTG  
CCTGGAAATGGGCATCTTCACGGAGGAGGACCTGGATCGGATCCACACTGCTACTGACAA  
TCGTGGGAACAAGGAGGGTGCAAGGGAACCTTCTGAGCAGAATAATGCGGAAGAAAGATTG  
GTTCTCTCCCTTTTTACTTGCTCTCCGTGAAACCCAACATGAAGACCTAGCAAATGAATTAA  
GTGGAGATACAGGAGGAACAGAGAATAGACAAAGTGAGATGAAGAACAGTACAAATGAAG  
AAACGGAAATTACAAGCCAACACGATATGCCATAGTGGAGGATTTGAAACAGCAAGAAAA  
TGTGATTGATAGTTTCAGCAGTGAGAACAGTGTATTGAAACATCCTTGGGAGAGAATTCT  
GTAGATTCAGAGTCAGATGTCTCCATAGGAGATGGAAGTGTCCGTAACCTTCAATGAAAAAC  
TGGGCCAGAGCTGCACAACCAAGTGATTCAGATGAAGAGGAG-----  
AGGAGAGCTTCCCCTGAGCTAGATCTGACCCTGAGAGATTACCAGATGGAAGTTGCAAAG  
CCAGCACTGAATGGGGAGAATATTATAATATGTCTCCCTACAGGCACTGGTAAAACCAGGG  
TGGCTGTTTACATTACCAAAGATCACTTGGATAAGAAGAAAAGAGTGTGAGAACCTGGAAA  
AGTCATAGTACTCGTTAATAAGGTACCATTGGTAGAACAGCATTTAGAATCAGAGTTTCATC  
CATTCCTGAAGCATTGGTATCAAGTTATTGGTTTAAAGTGGTGATACTCAACTGAAAATCTCA  
TTTCTGAAGTTGTGAGAAAAAATGATGTCATCATCTGTACAGCACAGATCCTTGAGAATTC  
ACTCATAAATGCAGACAAGGAAGATGAAGAAGGTGTCCACTTATCAGATTTTTCCCTTATCA  
TTATTGATGAGTGTGATCAGCTCAGAACGAAGGAGTCTACAACAATATAATGCGACGTTAC  
TTAAAAGAAAAGATGAAGAACAGGAAGCTGGCAAAAAGAAAACAAACCACTGATCCCACAGC  
CTCAGGTTGTGGGACTTACAGCCTCACCTGGTGTAGGAGGTGCAACATCCTACTCAAAAG  
CTGAAGAGCATATTCTGAAAATCTGTGCCAATCTTGATGCATGTAGAATTATGACTGTTGAA  
GAGCATGCAGACCAGTTAAAGAATCAGGTGAAGGAGCCGTCTAAGAAGACTGTGGTTGCA  
AATGACAAAAAAGGGATCCATTTAGAGAGGAAATTACTGAGATCATGACAGAAATACAAAA  
CTATTGCCACCTCCATCCAAAATCTGAGTTTGGAACTCAGACATATGAACAGTGGGTGATC  
AAAGAAGAGAGAAGAGCTGCAAAAGAAGAAAAACGCAAGGAACGCGTCTGTGCAGAACAC  
TTGAAGAAATACAATGATGCTCTCCTGATAAATGAGAGTATCCGAATGGTGGATGCATACAA  
TCACCTAACTAACTTTTATGAGGAGGAAAAAAGTAAGAAGACAGCAAGGAGTGATGATGAT  
GATGAACCAACTGTATCAAAACAGGATGAAACAGATGAATTTCTAATAGGTTTATTTTCATGC  
AAAAAAGAAGAGGCTGAAAAAGTTGGCTGGAAAGCCAGAACATGAAAATGAGAATCTCATA  
CAGTTGCGAAATACTTTAATGGAGGAGTTCACGAAGACTGAGGAACCTAGAGGAATTATTT  
TCACAAAGACTCGTCTAAGTGCCCTTGTCTATTCCAGTGGATTCAAGACAACCCAAAATTT  
GAAGAAGTGGGAATTAAGGCCCGTTATCTTATCGGCTCTGGACATAACAGTGAAATGAAAC  
CCATGACTCAGAATGAGCAAAGGGAAGTTATTGATAAATCCGATGTGGAAATGTAAATTTA  
CTTATCGCTACAACCTGTAGCTGAGGAAGGTCTGGACATCAAAGAGTGTAACATTGTTATTC  
GCTATGGCCTGGTCACCAATGAAATTGCTATGGTGCAGGCTCGTGGCCGAGCTCGAGCTG  
ATGAGAGCACTTATGCTCTTGTGGCTCCTAGTGGATCAGGAGCTGTTGAACGTGAAGATGT  
TAATATTTTCCGTGAGAAAATGATGTATAAGGCCATTGAGCGTGTCCAGAATATGCCACAG

GAAGAGTATTTAAATAAGATTCATAATTTCCAGTTGCAAAGTATACTGGAAAAACAAATGAA  
GGCAAAGAGAGATCAGCGCAAGACATACAAGAAAAATCCTTCACTAGTAACATTCTTATGC  
AAAAATTGCCACAACTGGTATGTTCTGGAGAAGACATACAAGTTATTGAGCACATGCATCA  
TGTCAGTGTGAAAAAAGATTTCCAAAGCCTTTACCATACAAGAGAAAAATAAGACACTGCAAG  
ATAAGCATGCCGATTACCAGACAAACGGGGAAATTATATGTAAAGATTGTGGACAAGCTTG  
GGGAAATATGATGGTTCACCGAGGCCTTGACCTACCTTGTCTGAAGATTAGAAATTTTGTG  
GTTGTGTTTGCAGACAAGAAAAACAACAAAGCAAATTTTTAAGAAATGGGGAGAACTGCCCA  
TTAGGTTTCCTAGCTTTGATTATGCAGCTCATTGTCCTTCAAGTGATGAAGAT

>neopelma\_chrysocephalum-passeriformes-mda5

ATGGAAGAGGGGGACCGGGACGAGCGGTTCTCTACATGATCTCCTGCTTCAGGTCGCG  
GCTGAAGCAGTTCATCCAGGTGCAGCCCGTGCTGGACCAGCTCCCCTCGCTGAGCGCGG  
AGGAGAGGGAGAAGGTGCGGGCGGCCGCCCTGCAGCGAGGCGGGGTGGCGGGGGCCG  
AGGAGCTTCTGCGGGCCGTGGAGCGGGGGCCCCGCGGCTGCGGCTGGTTCCACGAGTT  
TCTGCAGGCGCTGGAGCACGGCGGCTGTAGCCTGGCCGCCTGCTACGCCAACCCAGCC  
TCAGCCAGCTGCCCTCGCCGGCCGAAGAGGCCGACCACGACCTCTGTGTGCACCTGGTG  
CAGCTGCTCCACAGCACGCTGGTGGACAGGATGCGGACCGTGAGGTGGCCGAGAAGTG  
CCTGGAAATGGGCATCTTCAAGGAGGAGGACCTGGATCGGATCCACACTGTTACTGACAA  
TCGTGGGAACAGAGAGGGGTGCAAGGGAGCTTCTGAGCAGAATAGTGCAGAAGAAAGATTG  
GTTCTCTCCTTTTCTGATTGCTCTCCGTGAAACCCAACATGGAGACCTGGCAAATGATTAA  
GTGGAAATACAGGAGGAACGGAGAATAGACAAAATGAGCTGAAGAACAGTACAAATGAAG  
AAACAGAAATTACAAGCCAACCAGGATATGTCATAATGGAGGATTTGAAACAGCAAGAAAA  
TGTGAATGATAGTTTCATCAGTGAGAGCAGTGTATTGAAACATCCATGGGAGAGAATTCT  
GTAGATTCAGAGTCAGATGTCTCCATAGGAGATGGAAGTGTCCGTAACCTTCAGTGAAAACC  
TGGGCCAGAGCTGCACAACCAGTGATTCAGATGAAGAGGAG-----

AGGAGAGCTTCACCTGAGCCAGATCTGACTCTGAGAGATTACCAGATGGAAGTTGCAAAG  
CCAGCACTAAATGGGGAAAATATTATAATATGTCTCCCTACAGGCACTGGTAAAACCAGAG  
TGGCTGTTTACATTACCAAAGATCACTTGGATAAGAAGAAAAGAGCATCAGAGCCTGGAAA  
AGTCATAGTACTTGTTAATAAGGTACCACTGGTACAACAGCATTTAGAATCAGAGTTTCATC  
CATTCCTGAAGCGTTGGTATCAGGTTATTGGTTTAAGTGGTGATTCTCAACTGAAAATCTCA  
TTTCCTGAAGTTGTCAGAAGAAATGATGTCATCATCAGTACAGCACAAATCCTTGAGAATTC  
ACTGATAAATGCAGACAAAGAAGATGAAGAAGGTGTCCACTTATCAGACTTTTCCCTTATCA  
TTATTGATGAGTGTATCACACTCAGAAGGAAGGTGTCTACAACAATATAATGCGTCGTTAC  
TTAAAAGAAAAGATGAAGAACAGGAAGCTGGCAAAAAGAAAACAAACCACTGATCCCACAAC  
CTCAGATTCTGGGACTTACAGCCTCACCTGGTGTAGGAGGTGCAAAATCGTACTCAAAAGC  
TGAAGACCATATTCTGAAAATCTGTGCCAATCTTGATGCATGTAGAATTATGACTGTTGAAG  
AGCATGAGGACCAGTTAAAGAATCAGGTGAAGGAGCCGTCCAAGAAGACTGTGGTTGCAA  
ATGACAAAAAAGGGATCCATTTAGAGAGGAAATTACTGAGATCATGACAGAAATACAAAAC  
TATTGCCAGTTCCATCCAAAATCTGAGTTTGGAACTCAGACATATGAACAGTGGGTGATCA  
GAGAAGAGAGAAGAGCTGCAAAAGAAGAAAAACGCAAGGAACGTGTCTGTGCAGAACACT  
TGAAGAAATACAATGATGCTCTCCTGATAAATGACAGTATCCGAATGGTGGATGCATACAAT  
CACCTAAATAACTTTTATAAGGAGGAGAAAAGTAAAAAGACAGTAAGGAGTGATGATGATG  
ATGAACCAGCTGTATCAAAACAGGATGAAACAGATGAATTTCTAATAGGTTTATTTCATACA  
AAAAAGAAGTTGCTGAAAAAGTTGGCTGGAAGCCAGAACATGAAAATGAGAATCTAATAC  
AGTTGAGAAATACTTTAATGGAGGAGTTCACGAAGACTGAGGAACCTAGAGGAATTATTTT

CACAAAGACTCGTCTAAGTGCCTTTGCTCTATTCCAGTGGATTCAAGACAACCCAAAATTTA  
AAGAAGTGGGAATTAAGGCCCATTTATCTTATCGGCTCTGGACATAACAGTGAAATGAAACC  
CATGACTCAGAATGAGCAAAGGGAAGTTATTGATAAATTCCGATGTGGAAATGTAAATTTAC  
TTATTGCTACTACTGTAGCTGAGGAAGGCTTGGACATCAAAGAGTGTAAACATCGTTATTCG  
CTATGGCCTTGTCACTAATGAAATTGCTATGGTGCAGGCTCGTGGTCGAGCTCGAGCTGAT  
GAGAGCACCTATGCTCTTGTGGCTCCGAGTGGCTCAGGAGCTGTTGAACGTGAAGATGTT  
AATATTTTCCGTGAGAAAATGATGTATAAGGCCATTTCAGCGTGTCCAGAAGATGCCACAGG  
AAGAGTATTTAAATAAGATTCAGAAATTCAGTTGCAAAGTATAGTGGAAAAACAAATGAAG  
GCAAAGAAAGATCAGCGCAAGACATACAAGAAAAATCCTTCACTAATAACATTCTTATGCAA  
AAATTGCCACAAAACGATATGTTCTGGAGAAGACATACAAGTTATTGAGTACATGCATCATG  
TCAGTGTGAAAAAAGATTTCCAAAACCTTTACCATACAAGAGAAAAATAAGACACTGCAAGAT  
AAGCATGCCGATTACCAGACAAATGGGGAAATTATATGTAAAGATTGTGGACAAGCTTGGG  
GAAATATGATGGTTCACCGAGGCCTTGACCTACCTTGTCTGAAGATTAGAAATTTTGTGGTT  
GTGTTTGCAGACAAGAAAAACAACAAAGCAAATTTTAAAGAAATGGGGAGAACTGCCCCGTCA  
GGTTTCCTGATTTTGAATTATGCAGCTCACTGTCCTTCAAGTGATGAAGAT

>corapipo\_altera-passeriformes-md5

ATGGAAGAGGGAGACCGGGACGAGAGGTTTCCTCTACATGATCTCCTGCTTCAGGCTGCGG  
CTGAAGCAGTTCATCCAGGTGCAGCCCGTGCTGGACCAGCTCCCTTCGCTGAGCGCGGA  
GGAGAGGGGAGAAGGTGCGGGCGGCCCTCCTGCAGGGGGGCGAGGTGGCGGGGGCCGA  
GGAGCTGCTGCGGGCCGTGGAGCGGGGACCCCGCGGCTGCGGCTGGTTCCACGAATTT  
CTGCAGGCACTAGAGCACGGCGGCTGTAGCCTGGCCGCCTGCTACGCCAACCCCAGCCT  
CAGCCAGCTGCCCTCGCCGGCCGAAGAGGCTGACCACGACCTCTGCGTGCACCTGGTGC  
AGCTGCTCTACAGCACGCTGGTGGACAGGATGCGGGCCGTGCAGGTGGCCGAGAAGTGC  
CTGGAAATGGGCATCTTCAAGGAGGAGGACCTGGAGCGGATCCAGACTGTTACTGACAAT  
CGTGGGAACAGAGAGGGTGCAAGGGAGCTTCTGAGCAGAATAATGCAGAAGAAAGACTG  
GTTCTCTCCTTTTTTAATTGCTCTCCGTGAAACCCAACATGGAGACCTGGCAGATGATTTAA  
GTGGAAATACAGGAGGAACAGAGAATAGACAAAATGAGATGAAGAACAGTACAAATGAAGA  
AACAGAAATTACAAGCCAACCAGGATATGCCACAGTGGAGGACCTGAAACAGCAAGAAAAAT  
GTGAATGATAGTTTTCATCAGTGAGAACAGTGTATTGGAAACATCCATGGGAGAGAATTCTG  
TAGATTACAGAGTCAGATGTCTCCATAGGAGATGGAAGTGTCTGTAACCTTCAGTGAAAACCT  
GGGCCAGAGCTGCACAACCAGCAATTCAGATGAAGAGGAG-----

AGGAGAGCTTCACCTGAGCCAGATCTGACCCTGAGAGATTACCAGATGGAAGTTGCAAAG  
CCAGCACTGAATGGGGAGAATATTATAATATGTCTCCCTACAGGCACTGGTAAAACCAGAG  
TGGCTGTTTACATTACCAAAGATCACTTGGATAAGAAGAAAAGAGCATCAGAGCCTGGAAA  
AGTCATAGTACTTGTTAATAAGGTACCACTGGTACAACAGCATTTAGAATCAGAGTTTCATC  
CATTCCTGAAGCGTTGGTATCAGGTTATTGGTTTAAGTGGTGATTGTCAACTGAAAATCTCA  
TTTCCTGAAGTTGTCAGAAGAAATGATGTCATCATCAGTACAGCACAAATCCTTGAGAATTC  
ACTAATAAATGCAGACAAAGAAGATGAAGAAGGTGTCCACTTATCAGATTTTTCCCTTATCA  
TTATTGATGAGTGTATCACACGCAGAAGGAAGGTGTCTACAACAATATAATGCGACGTTA  
CTTAAAAGAAAAGATGAAGAACAGGAAGCTGGCAAAAAGAAAACAAACCACTGATCCCACAG  
CCTCAGATTCTGGGACTTACAGCCTCACCTGGTGTAGGAGGCGCAAGATCCTACGCAAAA  
GCTGAAGACCATATTCTGAAAATCTGTGCCAATCTTGATGCATGTAGAATTATGACTGTTGA  
AGAGCATGAGGACCAGCTAAAGAATCAGGTGAAGGAACCATCCAAGAAGACTGTGGTTGC  
AAATGACAAAAAAAAGGGATCCATTTAGAGAGAAAATTACTGAGATCATGAAAGAAATACAAA

ACTATTGCCAGCTCCATCCAAAATCCGAGTTTGGAAGCTCAGACATATGAACAGTGGGTGAT  
CAGAGAAGAGAGAAGAGCTGCAAAAGAAGAAAAGCGCAAGGAACGTGTCTGTGCAGAACA  
CTTGAAGAAATACAATGATGCTCTCCTGATAAATGACAGTATCCGAATGGTGGATGCATACA  
ATCACCTAAATAACTTTTTATAAGGAGGAGAGAAAAGTAAGAAGACAGTAAGGAGTGATGATGAT  
GATGAACCAGCTGTATCAAAACAGGATGAAACAGATGAATTTCTAATAGGTTTATTTTCATGC  
AAAAAAGAAGTGGCTGAAAAAGTTGGCTGGAAAGCCAGAACATGAAAATGATAATCTAATA  
AAGTTGCGAAATACTCTAATGGAGGAGTTACACGAAGACTGAGGAACCCAGAGGAATTATTT  
TCACAAAGACTCGTCTAAGTGCCTTTGCTCTATTCCAGTGGATTCAAGACAACCCAAAATTT  
AAAGAAGTGGGAATTAAGGCCATTATCTTATCGGCTCTGGACATAACAGTGAAATGAAAC  
GCATGACTCAGAATGAGCAAAGGGAAGTTATTGATAAATTCGATGTGGAAATGTAAATTTA  
CTTATCGCTACTACTGTAGCTGAGGAAGGCTTGGACATCAAAGAGTGTAACATCGTTATTA  
GCTATGGCCTTGTCACCAATGAAATTGCTATGGTGCAGGCTCGTGGTTCGAGCTCGAGCTG  
ATGAAAGCACCTATGCTCTTGTGGCTCCGAGTGGCTCAGGAGCTGTTGAACGTGAAGATG  
TTAATATTTTCCGTGAGAAAATGATGTATAAGGCCATTACGCGTGTCCAGAAGATGCCACA  
GGAAGAGTATTTAAATAAGATTGAGAATTTCCAGTTGCAAAGTATAGTGGAACAAATGA  
AGGCAAAGAAAGATCAGCGCAAGACATACAAGAAAAATCCTTCACTAATAACATTCTTATGC  
AAAAATTGCCACAAAACGATATGTTCTGGAGAAGACATACAAGTTATTGAGTACATGCATCA  
TGTCAGTGTGAAAAAAGATTTCCAAAGCCTTTATCATACAAGAGAAAAATAAGACACTGCAAG  
ATAAGCATGCCGATTACCAGACAAATGGGGAAATTATATGTAAAGATTGTGGACAAGCTTG  
GGGAAATATGATGGTTCACCGAGGCCTTGACCTACCTTGTCTGAAGATTAGAAATTTTGTG  
GTTGTGTTTGCAGACAAGAAAACAACAAAGCAAATTTTTAAGAAATGGGGAGAACTGCCCCG  
TCAGGTTTCCTAGTTTTTGATTATGCAGCTCATTGTCTTCAAGTGATGAAGAC

>chiroxiphia\_lanceolata-passeriformes-mda5

ATGGAAGAGGGGGACCGTGACGAGAGGTTTCTCTACATGATCTCCTGCTTCAGGCCGCGG  
CTGAAGCAGTTCATCCAGGTGCAGCCCGTGCTGGACCAGCTCCCCTCGCTGAGCGCGGA  
GGAGAGGGGAGAAGGTGCGGGGCGGCCCTCCTGCAGGGGGGCGAGGTGGCGGGGGCCGA  
AGAGCTGCTGCGGGCCGTGGAGCGGGGACCCCGCGGCTGCGGCTGGTTCCACGAGTTT  
CTGCAGGCACTGGAGCACGGCGGCTGTAGCCTGGCCGCCTGCTACGCCAACCCAGCCT  
CAGCCAGCTGCCCTCGCCGGCCGAAGAGGCCGACCACGACCTCTGCGTGCACCTGGTGC  
AGCTGCTCTACAGCACGCTGGTGGACAGGATGCGGGCCGTGCAGGTGGCCGAGAAGTGC  
CTGGAAATGGGCATCTTCAAGGAGGAGGACCTGGAGCGGATCCAGACTGTTACTGACAA  
CGTGGGAACAGAGAGGGTGCAAGGGAGCTTCTGAGCAGAATAATGCAGAAGAAAGATTGG  
TTCTCTCCTTTTTTTGATTGCTCTCCGTGAAACCCAACATGGAGACCTGGCAGATGATTTAAG  
TGGAATACAGGAGGAACAGAGAATAGACAAAATGAGATGAAGAACAGTACAAATGAAGAA  
ACAGAAATTACAAGCCAACCAGGATATGCCACGGTGGAGGATTTGAAACAGCAAGAAAATG  
TGAATGATAGTTTCATCAGTGAGAACAGTGTATTGGAAACATCCATGGGAGAGAATTCTGTA  
GATTCAGATTCAGATGTCTCCATAGGAGATGGAAGTGTCCGTAACCTTCAGTGAAAACCTGG  
GCCAGAGCTGCACAACCAGCAATTCAGATGAAGAGGAG-----

AGGAGAGCTTCACCTGAGCCAGATCTGACCCTGAGAGATTACCAGATGGAAGTTGCAAAG  
CCAGCACTGAATGGGGAGAATATTATAATATGTCTCCCTACAGGCACTGGTAAAACCAGAG  
TGGCTGTTTACATTACCAAAGATCACTTGGATAAGAAGAAAAGAGCATCAGAGCCTGGAAA  
AGTCATAGTACTTGTTAATAAGGTACCACTGGTACAACAGCATTTAGAATCAGAGTTTCATC  
CATTCCTGAAGCGTTGGTATCAGGTTATTGGTTTAAGTGGTGATTGTCAACTGAAAATCTCA  
TTTCTGAAGTTGTCAGAAGAAATGATGTCATCATCAGTACAGCACAAATCCTTGAGAATTC

ACTGATAAATGCAGACAAAGAAGATGAAGAAGGTGTCCACTTATCAGATTTTTCCCTTGTCA  
TTATTGATGAGTGTTCATCACACGCAGAAGGAAGGTGTCTACAACAATATAATGCGACGTTA  
CTTAAAAGAAAAGATGAAGAACAGGAAGCTGGCAAAAGAAAACAAACCACTGATCCACAG  
CCTCAGATTCTGGGACTTACAGCCTCACCTGGTGTAGGAGGCGCAAGATCCTACGCAAAA  
GCTGAAGACCATATTCTGAAAATCTGTGCCAATCTTGATGCATGTAGAATTATGACTGTTGA  
AGAGCATGAGGACCAGTTAAAGAATCAGGTGAAGGAGCCGTCCAAGAAGACTGTGGTTGC  
AAATGACAAAAAAGGGATCCATTTAGAGAGAAAATTACTGAGATCATGACAGAAATACAAA  
ACTATTGCCAGCTCCATCCAAAATCCGAGTTTGGAAGCTCAGACATATGAACAGTGGGTGAT  
CAGAGAAGAGAGAAGAGCTGCAAAAGAAGAAAAACGCAAGGAACGTGTCTGTGCAGAACA  
CTTGAAGAAATACAATGATGCTCTCCTGATAAATGACAGTATCCGAATGGTGGATGCATACA  
ATCACCTAAATAACTTTTATAAGGAGGAGAAAAGTAAGAAGACAGTAAGGAGTGATGATGAT  
GATGAACCAGCTGTATCAAAACAGGATGAAACAGATGAATTTCTAATAGGTTTATTTTCATGC  
AAAAAAGAAGTGGCTGAAAAAGTTGGCTGGAAAGCCAGAACATGAAAATGAGAATCTAATA  
CAGTTGCGAAATACTTTAATGGAGGAGTTCACGAAGACTGAGGAACCCAGAGGAATTATTT  
TCACAAAGACTCGTCTAAGTGCCTTTGCTCTATTCCAGTGGATTCAAGACAATCCAAAATTT  
AAAGAAGTGGGAATTAAGGCCATTATCTTATCGGCTCTGGACATAACAGTGAAATGAAAC  
CCATGACTCAGAATGAGCAAAGGGAAGTTATTGATAAATCCGATGTGGAAATGTCAATTTA  
CTTATCGCTACTACTGTAGCTGAGGAAGGCTTGGACATCAAAGAGTGTAACATCGTTATTC  
GCTATGGCCTTGTACCAATGAAATTGCTATGGTGCAGGCTCGTGGTCGAGCTCGAGCTG  
ATGAAAGCACCTATGCTCTTGTGGCTCCGAGTGGCTCAGGAGCTGTTGAACGTGAAGATG  
TTAATATTTTCCGTGAGAAAATGATGTATAAGGCCATTCAGCGTGTCCAGAAGATGCCACA  
GGAAGAGTATTTAAATAAGATTGAGAATTTCCAGTTGCAAAGTATAGTGGAACAAATGA  
AGGCAAAGAAAAGATCAGCGCAAGACATACAAGAAAATCCTTCACTAATAACATTCTTATGC  
AAAAATTGCCACAAAACGATATGTTCTGGAGAAGACATACAAGTTATTGAGTACATGCATCA  
TGTCAGTGTGAAAAAAGATTTCCAAAGCCTTTATCATACAAGAGAAAATAAGACACTGCAAG  
ATAAGCATGCTGATTACCAGACAAATGGGGAAATTATATGTAAAGATTGTGGACAAGCTTG  
GGGAAATATGATGGTTCACCGAGGCCTTGACCTACCTTGTCTGAAGATTAGAAATTTTGTG  
GTTGTGTTTGCAGACAAGAAAACAACAAAGCAAATTTTTAAGAAATGGGGAGAACTGCCCA  
TCAGGTTTCCTAGTTTTGATTATGCAGCTCATTGTCCTTCAAGTGATGAAGAT

>manacus\_vitellinus-passeriformes-md5

ATGGAAGAGGGGGACCGGGACGAGAGGTTCTCTACATGATCTCCTGCTTCAGGCCGCG  
GCTGAAGCAGTTCATCCAGGTGCAGCCCGTGCTGGACCAGCTCCCCTCGCTGAGCGCGG  
AGGAGAGGGAGAAGGTGCGGGCGGCCCTCCTGCAGGGGGGCGCTGTGGCGGGGGCCG  
AGGAGCTGCTGCGGGCCGTGGAGGGGGGGCCCCGCGGCTGCGGCTGGTTCCACGAGTT  
TCTGCAGGCACTGGAGCACGGCGGCTGTAGCCTGGCCGCCTGCTACGCCAACCCAGCC  
TCAGCCAGCTGCCCTCGCCGGCCGAAGAGGCCGACCACGACCTCTGCGTGCACCTGGTG  
CAGCTGCTCTACAGCACGCTGGTGGACAGGATGCGGGCCGTGCAGGTGGCCGAGAAGTG  
CCTGGAAATGGGCATCTTCAAGGAGGAGGACCTGGAGCGGATCCAGACTGTTACTGACAA  
TCGTGGGAACAGAGAGGGTGCAAGGGAGCTTCTGAGCAGAATAATGCAGAAGAAAGATTG  
GTTCTCTCCTTTTTTATTGCTCTCCGTGAAACCAACATGGAGACCTGGCAGATGATTTAA  
GTGGAAATACAGGAGGAACAGAGAATAGACAAAATGAGATGAAGAACAGTACAAATGAAGA  
AACAGAAATTACAAGCCAACCAGGATATGCCACAGTGGAGGATTTGAAACAGCAAGAAAT  
GTGAATGATAGTTTCATCAGTGAGAACAGTGTATTGGAAACATCCATGGGAGAGAATTCTG  
TAGATTCAGAGTCAGATGTCTCCGTAGGAGATGGAAGTGTCGGTAACTTCAGTGAAAACCT

GGGCCAGAGCTGCACAACCAGCAATTCAGATGAAGAGAAG-----  
AGGAGAGCTTCACCTGAGCCAGATCTGACCCTGAGAGATTACCAGATGGAAGTTGCAAAG  
CCAGCACTGAATGGGGAGAATATTATAATATGTCTCCCTACAGGCACTGGTAAAACCAGAG  
TGGCTGTTTACATTACCAAAGATCACTTGGATAAGAAGAAAAGAGCATCAGAGCCTGGAAA  
AGTCATAGTACTTGTTAATAAGGTACCACTGGTACAACAGCATTTAGAATCAGAGTTTCATC  
CATTCCTGAAGCGTTGGTATCAGGTTATTGGTTTAAGTGGTGATTGTCAACTGAAAATCTCA  
TTTCCTGAAGTTGTGAGAAGAAATGATGTCATCATCAGTACAGCACAAATCCTTGAGAATTC  
ACTGATAAATGCAGACAAAGAAGATGAAGAAGGTGTCCACTTATCAGATTTTTCCCTTATCA  
TTATTGATGAGTGTGTCATCACACGCAGAAGGAAGGTGTCTACAACAATATAATGCGACGTTA  
CTTAAAAGAAAAGATGAAGAACAGGAAGCTGGCAAAAGAAAACAAACCACTGATCCCACAG  
CCTCAGATTCTGGGACTTACAGCCTCACCTGGTGTAGGAGGCGCAAGATCCTACTCAAAA  
GCTGAAGACCATATTCTGAAAATCTGTGCCAATCTTGATGCATGTAGAATTATGACTGTTGA  
AGAGCATGAGGACCAGTTAAAGAATCAGGTGAAGGAGCCGTCCAAGAAGACTGTGGTTGC  
AAATGACAAAAAAGGGATCCATTTAGAGAGAAAATTACTGAGATCATGACAGAAATACAAA  
ACTATTGCCAGCTCTATCCAAAATCCGAGTTTGGAAGTCAAGACATATGAACAGTGGGTGAT  
CAGAGAAGAGAGAAGAGCTGCAAAAGAAGAAAAACGCAAGGAACGTGTTTGTGAGAACA  
CTTGAAGAAATACAATGATGCTCTCCTGATAAATAACAGTATCCGAATGGTGGATGCATACA  
ATCACCTAAATAACTTTTTATAAGGAGGAGAAAAGTAAGAAGACAGTAAGGAGTGATGATGA  
CGATGAACCAGCTGTATCAAAACAGGATGAAACAGATGAATTTCTAATAGGTTTATTTTCATG  
CAAAAAAGAAGTGGCTGAAAAAGTTGGCTGGAAAGCCAGAACATGAAAATGAGACTCTAAT  
AAAGTTGCGAAATACTTTAATGGAGGAGTTCACGAAGACTGAGGAACCTAGAGGAATTATT  
TTCACAGAGACTCGTCTAAGTGCCCTTTGCTCTATTCCAGTGGATTCAAGACAACCCAAAATT  
TAAAGAAGTGGGAATTAAGGCCATTATCTTATCGGCTCTGGACATAACAGTGAAATGAAA  
CCCATGACTCAGAATGAGCAAAGGGAAGTTATTGATAAATTCCGATGTGGAAATTTAAATTT  
ACTTATTGCTACTACTGTAGCTGAGGAAGGCTTGGACATCAAAGAGTGTAACATCGTTATTC  
GCTATGGCCTTGTACCAATGAAATTGCTATGGTGCAGGCTCGCGGTGAGCTCGAGCTG  
ATGAGAGCACCTATGCTCTTGTGGCTCCGAGTGGCTCAGGAGCTGTTGAACGTGAAGATG  
TTAATATTTTCCGTGAGAAAATGATGTATAAGGCCATTACGCGTGTCCAGAAGATGCCACA  
GGAAGAGTATTTAAACAAGATTGAGAATTTCCAGTTGCAAAGTATAGTGGAAAAACAAATGA  
AGGCAAAGAAAGATCAGCGCAAGACATACAAGAAAAATCCTTCACTAATAACATTCTTATGC  
AAAAATTGCCACAAAACGATATGTTCTGGAGAAGACATACAAGTTATTGAGAACATGCATCA  
TGTCAGTGTGAAAAAAGATTTCCAAAGCCTTTATCATACAAGAGAAAAATAAGACACTGCAAG  
ATAAGCATGCCGATTACCAGACAAATGGGGAAATTATGTAAAGATTGTGGACAAGCTTG  
GGGAAATATGATGGTTCACCGAAGCCTTGACCTACCTTGCTGAAGATTAGAAATTTTGTG  
GTTGTGTTTGCAGACAAGAAAAACAACAAAGCAAATTTTTAAGAAATGGGGAGAAGTGCCCA  
TCAGGTTTCCTAGTTTTGATTATGCAGCTCATTGTCCTTCAAGTGATGAAGAT

>lepidothrix\_coronata-passeriformes-md5

ATGGAAGAGGGGGACCGGGACGAGAGGTTCTCTACATGATCTCCTGCTTCAGGCCGCG  
GCTGAAGCAGTTCATCCAGGTGCAGCCCGTGCTGGACCAGCTCCCCTCGCTGAGCGCGG  
AGGAGAGGGAGAAGGTGCGGGCGGCCCTCCTGCGGGGGGGCGCTGTGGCGGGGGCCG  
AGGAGCTGCTGCGGGCCGTGGAGCGGGGGCCCCGCGGCTGCGGCTGGTTCCACGAGTT  
TCTGCAGGCACTGGAGCAGGGCGGCTGTAGCCTGGCCGCCTGCTACGCCAACCCAGCC  
TCAGCCAGCTGCCCTCGCCGGCCGAAGAGGCCGACCACGACCTCTGCGTGCACCTGGTG  
CAGCTGCTCTACAGCACGCTGGTGGACAGGATGCGGGCCGTGCAGGTGGCCGAGAAGTG



CCTGGAAATGGGCATCTTCAAGGAGGAGGACCTGGAGCGGATCCAGACTGTTACTGACAA  
TCGTGGGAACAGAGAGGGTGCAAGGGAGCTTCTGAGCAGAATAATGCAGAAGAAAGATTG  
GTTCTCTCCTTTTTTATTGCTCTCCGTGAAACCCAACATGGAGACCTGGCAGATGATTTAA  
GTGGAAATACAGGAGGAACAGAGAATAGACAAAATGAGATGAAGAACAGTACAAATGAAGA  
AACAGAAATTACAAGCCAACCAGGATATGCCACAGTGGAGGATTTGAAACAGCAAGAAAAT  
GTGAATGATAGTTTCATCAGTGAGAACAGTGTATTGGAAACATCCATGGGAGAGAATTCTG  
TAGATTGAGAGTCAGATGTTTCCATAGGAGATGGAAGTGTCCGTAACCTTCAGTGAAAACCT  
GGGTCAGAGCTGCACAACCAGCAATTCAGATGAAGAGGAG-----  
AGGAGAGCTTCACCTGAGCCAGATCTGACCCTGAGAGATTACCAGATGGAAGTTGCAAAG  
CCAGCACTGAATGGGGAGAATATTATAATATGTCTCCCTACAGGCACTGGTAAAACCAGAG  
TGGCTGTTTACATTACCAAAGATCACTTGGATAAGAAGAAAAGATCATCAGAGCCTGGAAA  
AGTCATAGTACTTGTAAATAAGGTACCACTGGTACAACAGCATTTAGAATCAGAGTTTCATC  
CATTCCTGAAGCGTTGGTATCAGGTTATTGGTTTAAAGTGGTGATTGTCAACTGAAAATCTCG  
TTTCTGAAGTTGTCAGAAGAAATGATGTCATCATCAGTACAGCACAAATCCTTGAGAATTC  
ACTGATAAATGCAGACAAAGAAGATGAAGAAGGTGTCCACTTATCAGATTTTTCCCTTATCA  
TTATTGATGAGTGTATCACACGCAGAAGGAAGGTGTCTACAACAATATAATGCGACGTTA  
CTTAAAAGAAAAGATGAAGAACAGGAAGCTGGCAAAAAGAAAACAAACCACTGATCCACAG  
CCTCAGATTCTGGGACTTACAGCCTCACCTGGTGTAGGAGGTGCAAGATCCTACTCAAAAG  
CTGAAGACCATATTCTGAAAATCTGTGCCAATCTTGATGCATGTAGAATTATGACTGTTGAA  
GAGCATGAGGACCAGTTAAAGAATCAGGTGAAGGAGCCGTCCAAGAAGACTGTGGTTGCA  
AATGACAAAAAAGGGATCCATTTAGAGAGAAAATTACTGAGATCATGACAGAAATACAAAA  
CTATTGCCAGCTCCATCCAAAATCCGAGTTTGGAACTCAGACATATGAACAGTGGGTGATC  
AGAGAAGAGAGAAGAGCTGCAAAAAGAAAAACGCAAGGAACGTGTCTGTGCAGAACAC  
TTGAAGAAATACAATGATGCTCTCCTGATAAATGACAGTATCCGAATGGTGGATGCATACAA  
TCACCTAAATAACTTTTTATAAGGAGGAGAAAAGTAAGAAGACAGTAAGGAGTGATGATGAT  
GATGAACCAGCTGTATCAAAACAGGATGAAACAGATGAATTTCTAATAGTTTATTTTCATGC  
AAAAAAGAAGTGGCTGAAAAAGTTGGCTGGAAAGCCAGAACATGAAAATGAGAATCTAATA  
CAGTTGCGAAATACTTTAATGGAGGAGTTCACGAAGACTGAGGAACCTAGAGGAATTATTT  
TCACAAAGACTCGTCTAAGTGCCTTTGCTCTATTCCAGTGGATTCAAGACAACCCAAAATTT  
AAAGAAGTGGGAATTAAGGCCCATTTATCTTATCGGCTCTGGACATAACAGTGAAATGAAAC  
CCATGACTCAGAATGAGCAAAGGGAAGTTATTGATAAATTCGATGTGGAAATTTAAATTTA  
CTTATTGCTACTACTGTAGCTGAGGAAGGCTTGGACATCAAAGAGTGTAACATCGTTATTC  
GCTATGGCCTTGTACCAATGAAATTGCTATGGTGCAGGCTCGTGGTCGAGCTCGAGCTG  
ATGAGAGCACCTATGCTCTTGCTGCTCCGAGTGGCTCAGGAGCTGTTGAACGTGAAGATG  
TCAATATTTTCCGTGAGAAAATGATGTATAAGGCCATTGAGCGTGTCCAGAAGATGCCACA  
GGAAGAGTATTTAAATAAGATTCAGAATTTCCAGTTGCAAAGTATAGTGGAACAAATGA  
AGGCAAAAGAAAGATCAGCGCAAGACATACAAGAAAAATCCTTCACTAATAACATTCTTATGC  
AAAAATTGCCACAAAACGATATGTTCTGGAGAAGACATACAAGTTATTGAGAACATGCATCA  
TGTCAGTGTGAAAAAAGATTTCCAAAGCCTTTATCATACAAGAGAAAATAAGACACTGCAAG  
ATAAGCATGCCGATTACCAGACAAATGGGGAAATTATGTAAAGATTGTGGACAAGCTTG  
GGGAAATATGATGGTTCACCGAAGCCTTGACCTACCTTGTCTGAAGATTAGAAATTTTGTG  
GTTGTGTTTGCAGACAAGAAAACAACAAAGCAAATTTTTAAGAAATGGGGAGAACTGCCCA  
TCAGGTTTCCTAGTTTTGATTATGCAGCTCATTGTCCTTCAAGTGATGAAGAT

>pipra\_filicauda-passeriformes-mda5

ATGGAAGAGGGGGACCGGGACGAGAGGTTCTCTACATGATCTCCTGCTTCAGGCCGCG  
GCTGAAGCAGTTCATCCAGGTGCAGCCCGTGCTGGACCAGCTCCCCTCGCTGAGCGCGG  
AGGAGAGGGAGAAGGTGCGGGCGGCCCTCCTGCAGGGGGGCGCTGTGGCGGGGGCCG  
AGGAGCTGCTGCGGGCCGTGGAGCGGGGGCCCCGCGGCTGCGGCTGGTTCCACGAGTT  
TCTGCAGGCACTGGAGCACGGCGGCTGTAGCCTGGCCGCCTGCTACGCCAACCCAGCC  
TCAGCCAGCTGCCCTCGCCGGCCGAAGAGGCCGACCACGACCTCTGCGTGCACCTGGTG  
CAGCTGCTCTACAGCACGCTGGTGGACAGGATGCGGGCCGTGCAGGTGGCCGAGAAGTG  
CCTGGAAATGGGCATCTTCAAGGAGGAGGACCTGGAGCGGATCCAGACTGTTACTGACAA  
TCGTGGGAACAGAGAGGGTGCAAGGGAGCTTCTAAGCAGAATAATGCAGAAGAAAGATTG  
GTTCTCTCCTTTTTTGTGTTGCTCTCCGTGAAACCCAACATGGAGACCTGGCAGATGATTTAA  
GTGGAAATACAGGAGGAACAGAGAATAGACAAAATGAGATGAAGAACAGTACAAATGAAGA  
AACAGAAATTACAAGCCAACCAGGATATGCCACAGTGGAGGATTTGAAACAGCAAGAAAT  
GTGAATGATAGTTTCATCAGTGAGAACAGTGTATTGGAAACATCCATGGGAGAGAATTCTG  
TAGATTACAGAGTCAGATGTCTCCATAGGAGATGGAAGTGTCCGTAACCTCAGTGAAAACCT  
GGGTCAGAGCTGCACAACCAGCAATTCAGATGAAGAGGAG-----  
AGGAGAGCTTCACCTGAGCCAGATCTGACCCTGAGAGATTACCAGATGGAAGTTGCAAAG  
CCAGCACTAAATGGGGAGAATATTATAATATGTCTCCCTACAGGCACTGGTAAAACCAGAG  
TGGCTGTTTACATTACCAAAGATCACTTGGATAAGAAGAAAAGAGCATCAGAGCCTGGAAA  
AGTCATAGTACTTGTTAATAAGGTACCACTGGTACAACAGCATTTAGAATCAGAGTTTCATC  
CATTCTGAAGCGTTGGTATCAGGTTATTGGTTTAAGTGGTGATTGTCAACTGAAAATCTCA  
TTTCCTGAAGTTGTCAGAAGAAATGATGTCATCATCAGTACAGCACAAATCCTTGAGAATTC  
ACTGATAAATGCAGACAAAGAAGATGAAGAAGGTGTCCACTTATCAGATTTTTCCCTTATCA  
TTATTGATGAGTGTATCACACGCAGAAGGAAGGTGTCTACAACAATATAATGCGACGTTA  
CTTAAAAGAAAAGATGAAGAACAGGAAGCTGGCAAAAAGAAAACAAACCACTGATCCCACAG  
CCTCAGATTCTGGGACTTACAGCCTCACCTGGTGTAGGAGGCGCAAAATCCTACGCAAAA  
GCTGAAGACCATATTCTGAAAATCTGTGCCAATCTTGATGCATGTAGAATTATGACTGTTGA  
AGAGCATGAGGACCAGTTAAAGAATCAGGTGAAGGAGCCGTCCAAGAAGACTGTGGTTGC  
AAATGACAAAAAAGGGATCCATTTAGAGAGAAAATTACTGAGATCATGACAGAAATACAAA  
ACTATTGCCAGCTCCATCCAAAATCCGAGTTTGGAACCTCAGACATACGAACAGTGGGTGAT  
CAGAGAAGAGAAAAGAGCTGCAAAAGAAGAAAAACGCAAGGAACGTGTCTGTGCAGAACA  
CTTGAAGAAATACAATGATGCTCTCCTGATAAATGACAGTATCCGAATGGTGGATGCATACA  
ATCACCTAAATAACTTTTTATAAGGAGGAGAAAAGTAAGAAGACAGTAAGGAGTGATGATGAT  
GATGAACCAGCTGTATCAAAACAGGATGAAACAGATGAATTTCTAATAGGTTTATTTTCATGC  
AAAAAAGAAGTGGCTGAAAAAGTTGGCTGGAAAGCCAGAACATGAAAATGAGAATCTAATA  
CAGCTGCGAAATACTTTAATGGAGGAGTTCACGAAGACTGAGGAACCTAGAGGAATTATTT  
TCACAAAGACTCGTCTAAGTGCCTTTGCTCTATTCCAGTGGATTCAAGACAACCCAAAATTT  
AAAGAAGTGGGAATTAAGGCCATTATCTTATCGGCTCTGGACATAACAGTGAAATGAAAC  
CCATGACTCAGAATGAGCAAAGGGAAGTTATTGATAAATTCCGATGTGGAAATTTAAATTTA  
CTTATTGCTACTACTGTAGCTGAGGAAGGCTTGGACATCAAAGAGTGTAACATCGTTATTC  
GCTATGGCCTTGTCACCAATGAAATTGCTATGGTGCAGGCTCGTGGTTCGAGCTCGAGCTG  
ATGAGAGCACCTATGCTCTTGTGGCTCCGAGTGGCTCAGGAGCTGTTGAACGTGAAGATG  
TTAATATTTTCCGTGAGAAAATGATGTATAAGGCCATTACGCGTGTCCAGAAGATGCCACA  
GGAAGAGTATTTAAATAAGATTCAGAATTTCCAGTTGCAAAGTATAGTGAAAAACAAATGA  
AGGCAAAGAAAGATCAGCGCAAGACATACAAGAAAAATCCTTCACTAATAACATTCTTATGC

AAAAATTGCCACAAAACGATATGTTCTGGAGAAGACATACAAGTTATTGAGAACATGCATCA  
TGTCAGTGTGAAAAAAGATTTCCAAAGCCTTTATCATACAAGAGAAAAATAAGACACTGCAAG  
ATAAGCATGCCGATTACCAGACAAATGGGGAAATTATATGTAAAGATTGTGGACAAGCTTG  
GGGAAATATGATGGTTCACCGAAGCCTTGACCTACCTTGTCTGAAGATTAGAAATTTTGTG  
GTTGTGTTTGCAGACAAGAAAAACAACAAAGCAAATTTTTAAGAAATGGGGAGAACTGCCCG  
TCAGGTTTCCTAGTTTTGATTATGCAGCTCATTGTCTTCAAGTGATGAAGAT  
>colius\_striatus-coliiformes-md5\_partial

-----

-----

-----

NNCTACATGAACCCCAGCCTCAGCCAGCTGCCCTCGCCCGCCGAGGAAGCCGACCACGA  
CCTCTGCGTGCACCTTGGTGCAGCTGCTCCACAGAACATTGGTAGAGAGAATGCGGGCCGT  
GCAGGTGGCCGAGAAGTGCCTGCAGATGGACATCCTCCAGGACGAGGACCTGGATCGGA  
TCCACACTGTTACAGACCATCGTGGGAACAGAGAAGGTGCGCGGGAGCTCTTGAGCAGAA  
TAGTGCAGAAGAAAGATTGGTTCTCTCCTTTTTTGGTTGCTCTACGTGAAACCCAACATGGA  
CACCTTGCAGATGATTTAAGCGGAAATACAGGAGGAACAGAAAAATAGAGAAGATGTGATAA  
AGAGCAGTACAAATAAAGAAACAGAAGGTACAACCCAACCTGGATATACCACAGCAGAGGA  
TTTGAAACAGCAAGAAAATGTGAATGACAGTTTCAGCAGTGAGAACAGTATATTGAAACAA  
CTATTCAAAATAATTCTGCAGTTTCAGAGTCAGATATCTCCATAAGAGATGGAAGTGTCAAT  
AATGTTAATAAAAACCTGGGACAATGCTGCACAACCAAGTGATTCAGATGAAGATGAAGTGG  
AGAGCAGAGCTTCACCTGAGCCAGATCTGATCCTGAGAGATTACCAGATGGAAGTTGCAAA  
ACCAGCACTGAATGGAGAGAATATTATAATATGTCTCCCTACCGGCAGTGGTAAAACCAGA  
GTGGCTGTTTACATTACCAAAGATCATTTGGATAAGAAGAAAATAGCTTCAGAGACTGGAAA  
AGTTATAGTACTTGTTAATAAGGTACCGTTGGTAGAACAGCATTTACGGAAGGAGTTTAATC  
CATTCCTGAAGCGTTGGTATCAGGTTACTGGTTAAGTGGCGATTCTCAGCTGAAAATCTC  
GTTTCCTGAAGTTGTCAAGAGAAATGATGTCATCATCAGTACAGCACAGATCCTTGAGAATT  
CACTGTTAAATGCAGCCAAAGAAGATGAAGAAGGTGTACATTTATCAGATTTTTCGCTCATC  
ATTATCGATGAGTGTATCACACTCAAAAAGAAGGTGTCTACAACAATATAATGCGACGTTA  
CTTAAAAGAAAAGATGAAGAACAGGAAGCTGGCAAAAAGAAAACAAACCACTGATCCAGCAG  
CCTCAGATTCTGGGACTTACAGCCTCACCTGGTGTAGGAAGTGCAAGAAATTACTCAAAAG  
CTGAAGAACATATTCTGAAAATCTGTGCGAATCTTGATGCATGTAGAATCATGACTGTCATA  
GAGCATGCCTCTCAATTGAAGAATCAGGTGAAGGAACCATATAAGAAAACCTGTAATTGCAG  
ATGACAAAAGAAAGGATCCATTTAGAGAGAAAATTACTGAGATCATGAGAGACATTCAAAAT  
TATTGCCAACTCTGTCCAAAATCTGAGTTTGGAACTCAGCCATATGAACAGTGGGTGATTA  
GAGAAGAAAAAAAAGCTGCAAAAAGAAGAAAAACGCAAGGAACGTGTATGTGCAGAACACTT  
GAAGAAGTACAATGATGCTCTCCAGATAAATGACACCATCCGAATGGTGGATGCATATAAT  
CACCTAAATAACTTTTTATAAGGAGGAGAAAAGTAAAAAGACAGTAAGGAGTGATGATGGTG  
ATGAACCAGCAGTCTCAAAGCAGGATGAAACAGATGAATTTCTTATAGGTTTATTTTCATGCA  
AAAAAGAAACAGCTGAAAGAGTTGGCTAGAAATCCAGAATATGAAAATGAGAACCTAATAAA  
GTTGCGAAACACTTTAATGGAGGAGTTCACGAAGACTAAGGAACCTAGAGGAATTATTTTC  
ACCAAGACTCGGCTAAGTGCCTGTGCTCTATTCCAGTGGATTAAGGACAACCCAAAATTTG  
CAGAAGTGGGAATTAAGGCCCATATCTTATCGGTGCTGGACATAACAGTGAAGTTAAACC  
CATGACTCAGAATGAGCAAAGAGAAATTATTGATAAATTCGAGGTGGAAATGTAAATTTAC  
TTATTGCTACTACTGTAGCTGAAGAAGGCCTAGACATCAAAGAGTGTAACATCGTTATCCG

CTATGGCCTTGTACCAATGAAATTGCTATGGTGCAGGCTCGTGGTCGGGCTCGAGCTGA  
TGAGAGCACCTATGCCCTAGTGGCTTCAAGTGGCTCAGGAGCTGTTGAACGTGAAGATGT  
TAATGTTTTCCGTGAGCAAATGATGTATAAGGCCATTACGCGTGTCCAAAAGATGCCACAG  
GAAGAGTATTTAAAGAAGATTCACAATTTCCAGTTGCAAAGTATAATGGAAAAACAAATGAA  
GACAAAGAGAGATCAGTGCAAGGCATACAAGAAAAATCCTTCACTAATAAATTTCTATGCA  
AAAATTGCCACAAGCTGGTATGTTCTGGAGAAGACATACAAGTTATTGAGAACATGCATCAT  
GTCAGTGTGAAAAAAGATTTCCAAAATCTTTACCATACAAGAGCAAATAAGACATTGCAAGA  
TAAGAATGATGATCACCAGATAAATGGGGAAATTATATGTAAAGAATGTGGACAAGCTTGG  
GGAAATATGATGGTTCACCAAGGTCTTGATCTGCCTTGTCTGAAGATTAAAAATTTGTGGT  
TGTGTTTGAACACAAGAAAACAAGAAAGGATATTTTTAAGAAATGGGGAGATTTGCCCATCA  
AGTTCCCTAGTTTGGATTATGCAGCTCATTGTCTTCAAGCGATGAAGAT

>merops\_nubicus-coraciiformes-mda5

ATGGCAGGGGACCCCCGGGACGAGCGCTTCCTCTACATGATCTCCTGCTTCAGGCCGCG  
GCTGAAGAAGTTCATCCGGGTGCAGCCGGTGCTAGACCGGCTCCCCTCGCTGAGCGCCG  
AGGAGCGGGAGAAGGTGCGGGCGGCCGCCCTGCAGCGCGGCGAGGTGGAGGGGGCGG  
AGGAGCTGCTGCGGGCCGTGGAGCGGGGCCCGCGGGTGCGGCTGGTTCCACGAGTT  
CCTGCAGGCGCTGGAGCACGGCGGCTGCGGCCTGGCCGCCTGCTACGTGAACCCAGC  
CTGAGCCAGCTGCCCTCGCCGGCCGAGGAAGACGACCACGACCTCTGCGTGCACCTGGT  
GCAGCTGCTCCACAGCACGCTGGTGGACAGAATGCAGGCGGTGCAGTTGGCCGAGAAGT  
GCCTGGAGATGGGCCTCTTCCAGGACGAGGACCTGGATCGGATCCACACTGTTACTGAGA  
ATCGTGGAATAGAGATGGTGCAAGGGAGCTATTGAGCAGAATAGTGCAGAAGAAAAATT  
GGTTCTCTCATTTTTTGAGAGCTCTGCGTGAAACCAAGCATGGAAGCCTTGAGATGATTT  
AAGTGGAATACAGGAGGACTAGAGGATGGACAAAATGGGATGAATAACAGTACAAACAAA  
GCAACAGAAGTTACAAGCCAACCAGAATATGCCATAGAGGAGGATTTGAAACAGCCAGAAA  
ATGCGAATCGTACTTTTCAGCAGTGAGAACAGTGTATTGGAAACACCTGTTGGAAAGAATTC  
CGTAGTTTCAGAGTCCCGTGTCTCCATAGAAGATGGAAGTATCAGTAACCTGAATGAGAAC  
CTGGGAGAGAGCTCCACAACCAGTGATTCAGATGAAGATGAAGTGGAGAGCAGAGCTTCA  
CCTGAGCCAGATCTCATCCTGAGAGATTACCAGATGGAAGTTGCAAAGCCAGCACTGAATG  
GAGAGAATATTATAATATGCCTCCCTACAGGCAGTGGTAAAACTAGGGTGGCTGTTTACAT  
TACCAAAGATCACTTGGATAAGAAAAAAGAGTATCAAAGCCTGGAAAAGTTATAGTACTTG  
TTAATAAGGTACCGTTGGTAGAACAGCATTTACGGAAGGAGTTTAAGCCATTCTGAAGCG  
TTGGTATCAGGTTATTGGCTTAAGTGGTGATTCTCAACTGAAAATCTCATTTCTGAAGTTG  
TCAGAAGAAATGATGTCATCATCAGTACAGCACAGATCCTTGAGAATTCAGTGTAAATGCA  
GCTGAAGAAGACGAAGAAGGTGTCCACTTATCAGATTTTTCACTCATCATCATTGATGAGTG  
TCACCACACTCAAAGGAAGGTGTTTACAACAATGTAATGCGACGTTACTTAAGAGAAAAG  
ATGAAGAACAACAAGCTGGCAAAAGAGAACAAACCACTGATCCCACAGCCTCAGATTCTGG  
GACTCACAGCCTCACCTGGTGTAGGAGGTGCAACATCCAACCTCAAAGCTGAAGAACACAT  
TCTGAAAATCTGTGCCAACCTTGATGCATGTAGAATCATGACTGTTGAAGAGCACGCCTCC  
CAACTGAAGAATCAGGTGAAAGAACCTTATAAGAAGACTGTGATTGCAGATGACGAAAGAA  
GGGATCCATTTAGAGAGAGAATTACTGAGATCATGACAGACATTCAAACCTATGGCCAGCT  
CCATCCAAAAGCTGAGTTTGGAACTCAGCCTTATGAACAGTGGGTGATTAGAGAAGAGAGA  
AGAGCTGCAAAAGAAGTAAAACGCAAGGAACGCGTCTGTGCAGAACACCTGAAGAAATAC  
AATGATGCTCTCCAGATAAATGACACCATCCGAATGGTAGATGCGTACAATCACCTAAATAA  
CTTTTATAAGGAGGAGAAAAGTAGGAAGACAGTAAGGAGTGATGATGATGATGAACCAGCA

GTTTCAAAACAGGATGAAACAGATGATTTTTTAATGGGTTTATTTTCATGCAAAAAAGAAGCA  
GCTAAAAGAATTGGCTAGAAAGGCCAGAATATGAAAATGAGAAGTTAAAAGAGTTGCGAAAC  
ACTTTAATGGAGGAGTTCACGAAGACTGAGGAACCTAGAGGGATTATTTTCACAAAGACTC  
GGCTAAGTGCCTTTGCTCTATTCCAGTGGATTAAGGATAACCCAAAATTTGAAGAAGTGGG  
AATTAAGGCCCATATTCTTATTGGTGCTGGACATAACAGTGAACTAAACCCATGACTCAGA  
ATGAGCAAAGGGAAGTTATCGATAAATTCGCGAGTGGAATGTAAATTTGCTTATTGCTACT  
AGTGTAGCTGAGGAAGGCCTAGACATCAAAGAGTGTAACATCATTATTTGCTATGGCCTCA  
TCACTAATGAAATTGCTATGTTGCAGACTCGTGGTCGAGCTCGAGCTGATGAGAGCACCTA  
TGCACTTGTGGCTTCAAGTGGCTCAGGAGCTGTTGAACGTGACTACGTTAATATGTTCCGT  
GAGAAAATGATGTACAAGGCCATTCAGCGCGTCCAGAAGATGCCACGGGAAGAGTATTTA  
CGTAAGATTGAGACTTTCCAGTTGCAAAGTATCGTGGAATAAATGAAAGCAAAAAGAG  
ATCAGCACAAGACATTCAAGAAAAATCCTTCACTAATAACATTCTATGCAAAAATTGCCAC  
AAGCTGATATGTTCTGGAGAAGACATACAAGTTATTGAAAACATGCATCATGTCAAGTGTGAA  
AAAGGATTTCCAAAGCCTTTACCATACAAGAGAAAAATAAGACACTTCAAGACAAGCATGCC  
GATCACCAGACAAATGGGGAATTTATATGTAAAGACTGTGGACAAGCGTGGGGAAATATGA  
TGGTTCACCGAGGTCTTGATCTGCCTTGTCTAAAGATTAGAAATTTTGTGGTTGTGTTTGAA  
GACAAGAAAACAACAAAGCACATTTTTAAGAAATGGGGAGAACTGCCCGTTAGGTTCCCTA  
GTTTGGATTATGCAGCTCATTGTCTTCAAGTGATGAAGAC

>buceros\_rhinoceros-bucerotiformes-md5

ATGGCCGAGGGGTCCCGGGACGCGCGCTTCCTCTACATGATCTCCTGCTTCAGGCCGCG  
GCTGAAGCAGTTCATCCGGGTGCAGCCGGTGCTGGACCGGCTTCCCTCGCTGMGCGCCS  
GGGGGAGGGAGGAGGKGCGGGSCGCCGCCCTACAGCGGGGAGAGGCGGAAGGTGCGG  
AGGAGCTGCTGCGGGCCGTGGAGCGGGGTCCCCGCGGGTGCGGCTGGKTCMCGAGKT  
CCTGCAGGCTCTGGRGCACGGCGGSTGCAGCCTGGCCGCCYGCTACGCGAACCCAGCC  
TCAGCCAGCTGCCCTCGCCGGCCGAAGAGGCTGACCACGACCTCTGCGTGCACTTGGTG  
AACCTACTCTACAGCTCACTGGTGGATAGAATGCAGACGGTGCAGGTGGCCGAGAAGTGC  
CTGCAGATGGGCATCTTCCAGGACGAAGACCTGGATAGGATCCAGACCATTACTGATAATC  
GTGGGAACAGAGATGGTGCAAGGGAGCTATTGAGCAGAATAGTGCAGAAAAAAGATTGGT  
TCTCTCGTTTTCTGATGGCTCTGCGTGAAACCCAACATGGAGACCTTGCAGATGATTTAAG  
TGGAATAACAGGAGGAACAGAGAACAGACAAAACGGGATGAAGAACAGTATAACAATGAA  
ACAGAAGCTTCAAGCCAAGTAGGATATGTCGTAGTGGAGGATTTGAAACAGCAAGAAAAA  
TGAATGATAGTTTCAGCAGTGAGAACAGTGTATTGGAAACATCTGTTGGAAAGAATTTTGT  
GTTTCA-----

GGAGATGGAAGTGTCACTAAGTGAATGAAAACCTGGAACAGACCTATACAACCAGTGACT  
CAGATGAAGATGAAACGGAGAGCAGAGCTTCACCTGAGCCAGATCTGATCCTAAGAGATTA  
CCAAATGGAAGTTGCGAAGCCAGCACTGAATGGGGAGAATATTATAATATGTCTCCCTACA  
GGCAGTGGTAAACCCGAGTGGCTGTTTACATTACCAAAGATCACTTGGATAAGAAGAAAA  
GAGCATCAGAGCCTGGAAAAGTTATAGTACTTGTTAATAAGGTACCGTTGGTAGAACAGCA  
TTTACGAAAGGAGTTTAATCCATTCTGAAGCGCTGGTATCGGGTTATTGGTTTAAGTGGT  
GATACGCAACTAAAAATCTCATTTCTGAAGTTGTCAGAAGATACGATGTAATCATCAGTAC  
AGCACAGATCCTTGAGAATTCAGTGTAAATGCTGCCGACGAAGATGAA---  
GGTGTCCACATATCAGATTTTTTCACTCATCATCATCGATGAGTGTATCACACTCAGAAGGA  
AGGTGTCTACAACAATATAATGCGACGTTACCTAAAGGAAAAGATGAAGAACAGAAGCTG  
GCAAAAGAAAACAACCACTGATCCCACAGCCTCAGATTCTAGGACTTACAGCCTCACCTG

GTGTAGGAGGTGCAACATGCCACTCAAAAGCTGAAGAACATATTCTGAAAATCTGTGCCAA  
TCTTGATGCGTG TAGAATCATGACTGTCTGAAGAGCATGCCTCCCAGTTGAAGAGTCAGGTG  
AAGGAACCGTATAAGAAGACTGTAATTGCAGATGACAAAAGAAGGGATCCATTTAGAGAGA  
GAATTACTGAGATCATGACAGACATTCAAACTATTGCCAGCTCCATCCAAAATCTGAGTTT  
GGAACCCAGCCTTATGAACAGTGGGTGATTAGAGAAGAGAGAAGAGCTGCAATAGAAAAA  
AAGCGCAAGGAACGTGTCTGTGCAGAACATTTAAAGAAATACAATGATGCTCTCCAGATAA  
ATGACACTATCCGAATGGTGGATGCATACAATCACCTAAATAACTTCTATAAAGAGGAGAAA  
AATAAAAAGACAGTAACGAGTGATGATGGTGATGAACCAGCAGTATCAAAACAGGATGAAA  
CAGATGAATTTCTAATAGGTTTTATTTTCATGCAAAAAAGAAACAGCTGAAAAGAGTTGGCTACA  
AAGCCAGAATATGAAAATGAGAAGCTAATAAAGTTGCGAAACACTTTAATGGAGGAGTTCA  
CGAAGACTGAGGAACCTAGAGGAATTATTTTCACAAAGACTCGGCAAAGTGCCTTTGCTCT  
ATTCCAGTGGATTAAGGATAACCCAAAATTTGAAGAAGTGGGAATTAAGGCCATTATCTTA  
TCGGTGCTGGACATAACAGCGAAATGAAACCCATGACTCAGAATGAGCAAAGGGAAGTTAT  
TGATAAATTCCGAAGTGGAAATGTAAATTTACTTATTGCTACTACTGTTGCTGAGGAAGGCC  
TAGACATCAAAGAGTGTAACATTGTTATTTGCTATGGCCATGTCACAAATGAAATTGCGATG  
GTACAGGCTCGTGGACGAGCTCGAGCTGATGAGAGCACCTATGCGCTTGTGGCTTCAATT  
AGCTCAGGAGCTATTGAACGTGAAGATGTTAATGTCTACCGTGAGAAAATGATGTATAAGG  
CCATTCAGCGTGTCCAGAAGATGCCAAAGGAAGAGTATTTAAATAAGCTTGAGAATTTCCA  
GTTGCAAAGTATAGTGGAAAAACAAATGAAGGCAAAGAGAGACCAGTGCAAGACATACAAG  
AAAAATCCTTCACTAATAACATTCTATGCAAAAATTGCCACAAGCTGATATGTTCTGGAGA  
AGACATACAAGTTATTGAAAACATGCATCATGTCAAGTGTAAGGAAAGATTTCCAAAGTCTTT  
ATCATACAAGAGAAAATAAGACACTGCAAAATAAGCATGCCGATTACCAGACAAATGGGGA  
AATTATATGTAAAGACTGTGGACAAGCTTGGGGAAATATGATGGTTCACCGAGGTCTTGAC  
CTGCCTTGTCTCAAGATTAGAAATTTTGTGGTTGTCTTTGAAGACAAGAAAAAACAAAGCA  
AATTTTAAAGAAATGGGCAGAACTGAGTGTGAGGTTCCCTAGTTTTGATTACGCAGCTCATT  
ATCCTTCAAGTGATGAAGAT

>nestor\_notabilis-psittaciformes-mda5

ATGGCAGCGGAGTTGCGAGACGAGCGGTGCCTCTACATGATCTCGTGCTTCAKGCCGCG  
GCTGAAGAAGTTCAKCCGGGKTCAGCCGGTGCTGGACCGGCTCCCCTCGCTCAGCGTGG  
AGGACAGGGAGAAGGTGCGGGCGGCCGCGCTGCAGCGGGGCGAAGTGGAAGGGGCGG  
AGGAGCTGCTGCGGGCCGTGGAGCGGGGGCCCCGCGGGGGCGGCTGGTTCCGCGGCT  
CCGCGCGGGGGCTGGAGCACGGCGGCTGCGGCATGGCCGCTGCTACGTGAACCCAG  
CCTCAGCCAGCTGCCCTCGCCAGCCGAGGAGGCCGACCACGACCTCTGCGTGCAGCTGG  
TGCAGCTGCTTCACAGCACACTGGTGGATAGTATGCGGACCGTGCAAGTGGCCGAGAAGT  
GCCTAGAGATGGGCATCTTCCAGGATGAGGACCTGGATGGGATCCATACTGTTACTGACA  
ACCGTGGAACAGAGAAGGTGCAAGGGAAGTATTGAGCCGACTAATGCAGAAGAAAGATT  
GGTTCTCTCGTTTTTTGATTGCTCTGCGTGAAACCAACATGGAGGCCTTGCAGATGATT  
GAGTGGAATATAGGAGGAACAGAAGATAAACAAAATGGGATGAAGAACAGTATGAACAAA  
GAAAGAGAAGTTAAAAGCCAACCAGGTTATGCCATAGTGGAGGATTTGAAGCAGCAAGAAA  
ATATGAATGATAGTTTCAGCAGTGAGAACAATTTATTGGAAACATCTATTGGAAAGAATTCT  
GTAGTTTCAGAGTCAGATGTCTCTATAGGAGTTGGATGTATCAGTAACTTCAATGAAAATCT  
GGGTCAAAGCTGCACAACCAGTGATTCAGATGAAGAGGAG-----  
AGCAGAGCTTCACCTGAGCCAGATCTGGTCCTGAGAGATTACCAAATGGAAGTTGCAAAG  
CCAGCACTGAATGGGGAGAATATTATAATATGTCTCCCTACAGGCAGTGGTAAAACCAGAG

TGGCTGTTTACATTACCAAAGATCATTTGGATAAGAAGAAGAGAGCATCAGAGCCTGAAAA  
AGTTATAGTCCTTGTTAATAAGGTACCATTGGTAGAACAGCATTTACGAAAGGAGTTTAATC  
CATTCCTGAAGCGTTGGTATCATGTTATTGGTTTAAAGTGGTGATTCTCAGCTGAAAATCTTA  
TTTCCTGAAGTTGTCAGAAGAAATGATGTCATCATTTGTACAGCACAGATCCTTGAAAATTC  
ACTGCTAAATGCAGACAAAGAAGATGAAGAAGGTGTCAACTTATCAGATTTTTCACTCATCA  
TTATTGATGAGTGTATCACACTCAAAGGAAGGTGTCTACAATAACATAATGCGATGTTAC  
TTAAAAGAAAAAGAGAAGAACAGGAAGCTGGCAAAAAGAAAACAAACCACTGATCCCACAGC  
CTCAGATTCTGGGACTTACAGCCTCACCTGGTGTAGGAGGTGCAACTTCCTACTCCAAAGC  
TGAAGAACATATTCTGAAAATTTGTGCCAGTCTTGATGCATGTAGAATCATGACTGTTGAGG  
AGCATGCCTCCCAGCTGAAGAGTCAGGTGAAGGAACCTTTTAAGAAGACTGTGATTGCAGA  
TGACAAAAGAAGGGATCCATTTAAAGAGAGAATAACTGAGATCATGACAGAGATTCAAAAC  
TATTGCCAGCTCCATCCAAAATCTGAGTTTGGAACCTCAGCCGTATGAACAGTGGGTGATTA  
GAGAAGAGAAAAAGCTGCAAAAAGAAGAAAAACGCAAGGAACGTGTCTGTGCAGAACACC  
TAAAGAAATACAATGATGCTCTCCAGATAAATGATACCATCCGAATGATGGATGCGTACAAT  
CACCTGAATAACTTTTTATAAGGAGGAGAAAAAGTAGGAAGACAGTAAGAAGTGATGATGATG  
GTGAACCAGCAGTATCAAAACAGGATGAAACAGATTTATTTCTAATAGATTTATTTTCATGCA  
AAAAAGAAACATCTGAAAGAGTTGGCTAGAAAGCCAGAATATGAAAATGAGAAGCTAATAA  
AGTTGCGAAACACTTTAATGGAGGAGTTCACGAAGACTGAGGCACCTAGAGGAATTATTTT  
CACAAAGACACGGCTAAGTGCCTTTGCTCTATTCCAGTGGATTAAGGATAACCCCAAATTT  
GAAGAAGTGGAATTAAGGCCCATCATTTTATTGGTGCTGGACATAACAGTGAAATGAAAC  
GCATGACTCAGAATGAGCAAAGGGAAGTTATTGATAAATTCCGAGGTGGAATCTGAACTT  
ACTTATTGCTACTACTGTAGCGGAGGAAGGCCTAGACATCAAAGAGTGTAACATTGTTATTC  
GCTACGGCCTCGTCACCAATGAAATTGCTATGGTGACAGGCTCGTGGTCGAGCTAGAGCTG  
ATGAGAGTACCTATGCACTTGTGGCTTCGGTTGGCTCAGGAGCTGCTGAACGTGAAGAAG  
TTAATATTTTCCGTGAGCAAATGATGTATAAAGCCATTCCAGCGTATCCAGAAAATGCCACAG  
GATGAGTATTTAAAGAAGATCCAGAATTTCCAATGCCAAAATATAGTGGAAGAAAGAAATTA  
GGCAAAGAGACATCAGCACAAAGACATACAAGAAAAATCCTTCAATAATAACATTCCTATGCA  
AAAATTGCCACAAGCTGGTATGTTCTGGAGAAGACATACGAATTATTGAGAACATGCATCAT  
GTCAGTGTGAAAAGAGATTTTCAAAGGCTTTACCATACAAGAGAAAAATAAGACACTGCAAG  
ATAAGAATGCTGATTACCAGACAAATAGAGAAATTATTTGTAAAGATTGTGGACAAGCTTGG  
GGGAGCATGATGGTTCACCGAGGTCTTGACCTGCCTTGTCTAAAGATTATAAATTTTGTGAT  
TGTGTTTGAAGACAAAAAGACAACAAAAGAAATTTTTAAGAAATGGAGAGAGCTGCCCTTCA  
AGTTCCCTAGTTTTGATTATGCAGCTCATTGTCTTTCAAGTGATGAAGAT

>strigops\_habroptila-psittaciformes-mda5

ATGGCAGCGGAGTTGCGAGACGAGCGGTTTTCTCTACATGATCTCGTGCTTCAGGCCGCGG  
CTGAAGCAGTTCATCCGGGTGCAGCCGGTGCTGGACCGGCTCCCCTCGCTCAGCGCGGA  
CGACAGGGAGAAGGTGCGGGCGGGCCGCTCTGCAGCGGGGCGAGGTGGAAGGGGCGGA  
GGAGCTGCTACGGGGCCGTGGAGCGGGGGCCCCGCGGGTGCGGCTGGTTCACGAGTTC  
CTGCAGGCGCTGGAGCACGGCGGCTGCGGCATGGCCGCCTGCTACGTGAACCCAGCCT  
CAGCCAGCTGCCCTCGCCGGCCGAGGAGGACGACCACGACCTCTGCGTGCATTGGTG  
AGCTGCTCCACAGCACACTGGTGGATAGTATGCGGACCGTGAGGTGGCCGAGAAGTGC  
CTGCAGATGGGCATCTTCCAGGATGAAGACCTGGATGGGATCCTTACTGTTACTGACAATC  
GTGGAACAGAGAAGGTGCAAGGGAACCTGTTGAGCCGATTAGTGAGAAGAAAGATTGGT  
TCTCTCGTTTTCTGATTGCTCTGCGTGAAACCAACATGGAGGCCTTGACAGATGATTTGAG

TGGAATATAGGAGGAACAGAAGATAAAACAAAATGGGATGAAGAACAGTATAAACAAGGAA  
AGAGAAGTTAAAGGCCAACAGGTTATGCCATAGTGGAGGATTTGAAGCAGCAAGAAAATA  
TGAATGATAGTTTCAGCAGTGAGAACAATTTATTGGAAACATCTATTGGAAAGAATTCTGTA  
GTTTCAGAGTCAGATGTCTCTATAGGAGTTGGATGTGTTCAGTAACCTTGAATGAAAACCTGG  
GTCAAAGCTGCACAACCAAGTGATTTCAGATGCAGAGGAG-----  
AGCAGAGCTTCACCTGAGCCAGATCTGGTCCTGAGAGATTACCAAATGGAAGTTGCAAAG  
CCAGCACTGAATGGGGAGAATATTATAATATGTCTCCCTACAGGCAGTGGTAAAACCAAGAG  
TGGCTGTTTACATTACCAAAGATCATTTGGATAAGAAGAAGAGAGCATCAGAGCCTGGAAA  
AGTTATAGTCCTTGTTAATAAGGTACCATTGGTAGAACAGCATTTACGAAAGGAGTTTAATC  
CATTTCTGAAGCGTTGGTATCACGTTATTGGTTTAAGTGGTGATTCTCAGCTGAAAATCTCA  
TTTCCTGAAGTTGTCAGAAGAAATGATGTCATCATCTGTACAGCACAGATACTTGAAAATTC  
ACTGCTAAATGCAGACGAAGAAGAT-----  
GGTGTCCACTTATCAGATTTTTCTACTCCTCATTATTGATGAGTGTTCATCACACTCAAAGGA  
AGGTGTCTACAACAACATAATGCGACGTTATTTAAAAGAAAAAAGAAGAACAGGAAGCTG  
GCAAAGAAAAACAAACCACTGATCCACAGCCTCAGATTCTGGGACTTACAGCCTCACCTG  
GTGTAGGAGGTGCAACTTCCTACTCCAAAGCTGAAGAACATATTCTGAAAATCTGTGCCAA  
TCTTGATGCATGTAGAATCATGACTGTTGAGGAGCATGCCTCCCAACTGAAGAATCAGGTG  
AAGGAACCTTTTAAGAAGACTGTGATTGCAGATGACAAAAGAAGGGATCCATTTAGAGAGA  
GAATAACTGAGATCATGACAGAGATTCAAACTATTGCCAGCTCCATCCAAAATCTGAGTTT  
GGAAGTCAAGCCATATGAACAGTGGGTGATTAGAGAAGAGAAAAAAGCTGCAAAGAAGAAA  
AACGCAAGGAACGTGTCTGTGCAGAACACCTGAAGAAATACAATGATGCTCTCCAGATAAA  
TGATACCATCCGAATGGTGGATGCGTACAATCACCTGAATAACTTTTATAAGGAGGAGAAA  
AGTAAGAAGACAGTAAGGAGTGATGATGATGAACCAGCAGTATCAAACAGGATGAAA  
CAGATTTATTTCTAATAGGTTTATTTTCATGCAAAAAAGAAACAGCTGAAAGAGTTGGCTAGA  
AAGCCAGAATGTGAAAATGAGAAGCTAATACAGTTGCGAAACACTTTAATGGAGGAGTTCA  
CGAAGACTGAGGCACCTAGAGGAATTATTTTCACAAAGACCCGGCTAAGTGCCCTTTGCTCT  
ATTCCAGTGGATTAAGGATAACCCAAAATTTGAAGAAGTGGGAATTAAGGCCCATCATCTTA  
TTGGTGCTGGACATAACAGTGAAATGAAACGCATGACTCAGAATGAGCAAAGGGAAGTTAT  
TGATAAATTCCGAGGTGGAAATTTGAATTTACTTATTGCTACTACTGTAGCTGAGGAAGGCC  
TAGACATCAAAGAGTGTAACATTGTTATTCGCTACGGCCTCGTCACCAATGAAATTGCTATG  
GTGCAGGCTCGTGGTCGAGCTCGAGCTGATGAGAGCACCTATGCACTTGTGGCTTCGGTT  
GGCTCAGGAGCTGTTGAACGTGAAGATGTTAATATTTTCCGTGAGAAAATGATGTATAAAG  
CCATTCAGCATGTCCAGAAAATGCCACAGGATGAGTATTTAAAGAAGATCCAGAATTTCCA  
GTGCCAAAATATAGTGGAAAAAGAAATTAAGGCAAAGAGACATCAGCACAAAGACATACAAG  
AAAAATCCTTCACTATTAACATTCTATGCAAAAATTGCCACAAGCTGGTATGTTCTGGAGA  
AGACATAAGAGTTATTGAGAACATGCATCATGTCAGTGTGAAAAGAGATTTCCAAAGTCTTT  
ACCATAAAGAGAAAAATAAGACACTGCAAGATAAGGATGCTGATTACCAGACAAATGGAGA  
AATTATATGTAAAGATTGTGGACAAGCTTGGGGAAATATGATGGTTACCGAGGTCTTGAC  
CTCCCTTGTCTAAAGATTATAAATTTTGTGATTGTGTTTGAAGACAAGAAGATAACAAAAGAA  
ATTTTAAAGAAATGGAGAGAACTGCCCATTAAGTTCCCTAGTTTTGATTATACAGCTCATTGT  
CCTTCAAGTGATGAAGAT

>cacatua\_leadbeateri-psittaciformes-md5

ATGGCAGCGGAGTTGCGAGACGAGCGATTCTCTACATGATCTCGTGCTTCAGGCCGCGG  
CTGAAGCAGTTCATCCGGGTGCAGCCGGTGCTGGACAGGCTCCCCTCGCTCAGCGCGGA



[illegible]

TAAGAATGCTGACTACCAGACAAATGGAGAAGTTATATGTAAAGATTGTGGACAAGCTTGG  
GGAAATATGATGGTTCACCGAGGTCTTGACTTGCCTTGTCTAAAGATTATAAATTTTGTGAT  
TGTGTTTGAAGACAAGAAGACAACAAAAGAAATTTTTAAGAAATGGAGAGAGCTGCCCGTC  
GAGTTCCTAGTTTTGATTATGCAGCTCATTGTCCTTCGAGTGATGAGGAT

>psittacus\_timneh-psittaciformes-mda5

ATGGCAGGGGAGTTGCTAGACGAGCGGTTCTCTACATGATCTCGTGCTTCAGGCCGCGG  
CTGAAGCAGTTCATCCGAGTGACGCCGGTGCTGGACTGGCTCCCTTCGCTCAGCGCGGAA  
GACAGGGAGAAGGTGCGGGCGGCCGCGCTGCAGCGGGGCGAGGTGGAAGGGGCGGAG  
GAGCTGCTGCGGGCCGTGGAGCGGGGACCCCGCGGGTGTGGCTGGTTCCACGAGTTCTT  
GCAGGCGCTGGAGCACGGCGGCTGCGGCATGGCCGCTTGCTACGTGAACCCAGCCTCA  
GTCAGTTGCCCTCCCCGGCCGAGGAGGCCGACCACGACCTCTGCGTGCAATTGGTACAG  
CTGCTCCATAGCACTCTCGTGGATAATATGCGGACCGTGACAGGTGGCCGAGAAGTGCCTG  
CAGATGGGCATCTTCCAGGATGAGGACCTGAATGGGATCCATACTGTTACTGACAATCGTG  
GGAACAGAGAAGGTGCAAGGGAGCTATTGAGCAGATTAGTGCAGAAGAAAGGTTGGTTCT  
CTCGCTTTTTGATTGCTCTGCGTGAAACCCAACATGGAGACCTTGCAGATGACTTAGGTGG  
AAATATAGGAGGAACAAAGGATAAACAATAATGGGATGAAGAACAGTACAAACAAGAAACA  
GAAGTTACAAGCCAACCAGGTTATGCCATACTGGAGGATTTGAAGCAGCAGGAAAATATGA  
ATGATAGTTTCAGCAGTGAGAACAGTTTATTGGAAACATCTATTGGAAAGAATTCTGTAGTT  
TCAGAGTCAGATGTCTCTATAGGAGTTGGAAGTGTGAGTAACCTGAATGAAAACCTGGGGC  
AGAGCTGCACAAGCAGTGATTCAGATGAAGAGGAG-----

AGCAGAGCTTCATCTGAGCCAGATCTGGTCCTGAGAGATTACCAGATGGAAGTTGCAAAG  
CCAGCACTGAATGGGGAGAATATTATAATATGTCTCCCTACAGGCAGTGGTAAAACCAGAG  
TGGCTGTTTACATTACCAAAGATCATTTGGATAAAAAGAAAAGAGCATCAGAGCCTGGAAAA  
GTTATAGTCCTTGTTAATAAGGTACCATTGGTGGAAACAGCATTTACAAAAGGAGTTTAGTCC  
ATTCTGAAGCGCTGGTATCGTGTTATTGGTTTAAAGTGGTGATTCTCAGCTGAAAATCTCAT  
TTCCTGAAGTTGTCAGAAGAAATGATGTCATCATCTGCACAGCACAGATCCTTGAGAATTCA  
CTGCTAAATGCAGACAAAGAAGATGAAGAAGGTGTCCAGTTATCAGATTTTTCACTCATCAT  
TATTGATGAGTGTCATCACACTCAGAAGGAAGGTGTCTACAACAACATAATGCGACGTTAC  
TTAAAAGAAAAAAGAAGAACAGGAAGCTGACAAAAGAAAAACAAGCCTCTGATCCACAGC  
CTCAGATTCTGGGACTTACAGCCTCACCTGGTGTAGGAGGTGCAACATCCTATTCCAAAGC  
TGAAGAACATATTCTGAAAATCTGTGCCAATCTTGATGCATGTAGAATCATGACTGTTGAGG  
AACATGCCTCCCAGCTGAAGAATCAGGTGAAGGAACCTTTTAAGAAGACTGTGATTGCAGA  
TGACAAAAAAGGGATCCATTTAGAGAGAGAATTACTGAGATCATGACAGAGATTCAAACT  
ATTGCCAGCTTCATCCAAAATCTGAGTTTGGAACCTCAACCATATGAACAGTGGGTGATCAG  
AGAAGAGAAAAAAGCTGCAAAGAAGAAAAACGCAAGGAACGTGTCTGTGCAGAACACCT  
GAAGAAATACAATGATGCTCTCCAGATAAATGATACTATCCGAATGGTAGATGCGTACAATC  
ACCTGAACAACCTTTTATAAGGATGAGAAAAAGTAAGAAGACAGTAAGGAGTGATGATGATGA  
TACACCAGCAGTATCAAAACAGGATGGAACAGATTTATTTCTAATAGGTTTGTTCACGCAA  
AAAAGAAGGAGCTGAAAAAGTTGGCTAGAATGCCAGAATATGAAAATGAGAAGCTGACACA  
GTTGCGAAACACTTTAATGGAAGAGTTCACAAAGACTGAGGCACCTAGAGGAATTATTTTC  
ACAAAGACCCGGCTAAGTGCCCTTGTCTATTCCAGTGGATTAAGGATAACCCAAAATTTG  
AAGAAGTGGGAATTAAGGCCCATATCTTATTGGTGCTGGACATAACAGTGAAATGAAACC  
CATGACTCAGAATGAGCAACGGGAAGTTATTGATAAATTCCGAGGTGGAAATTTGAATTTAC  
TTATTGCTACTACTGTAGCTGAGGAAGGCCTAGACATCAAAGAGTGTAAACATTGTTATTCGC

TATGGTCTCGTCACCAATGAAATTGCTATGGTGCAGGCTCGTGGTCGAGCTCGAGCTGAT  
GAGAGCACCTATGCACTTGTGGCTTCAAGTGGCTCAGGAGCTGTTGAACGTGAAGACGTT  
AATATTTTCCGTGAGAAAATGATGTATAAAGCCATTGAGCATGTCCAGAAGATGCCACAGG  
AGGAGTATTTAAAGAAGATTCAGAATTTCCAGTGTCAAAGTATAGTGAAAAAGAAATGAAG  
ACAAAGAGACTTCAGCACAAAGACATACAAGAAAAATCCTTCACTAATAACATTCTTATGCAA  
AAATTGCCACAAGCTGGTATGTTCTGGGGAAGACATACAAGTTATTGAAAACATGCATCAT  
GTCAGTGTGAAAAGAGATTTCCAAAGTCTTTACCATACAAGAGAAAAATAAGACCCTGCAAG  
ATAAGAATGCTGATTACCAGACAAATGGAGAAGTTATATGTAAAGATTGTGGACAAGCTTG  
GGGAAATATGATGGTTCACCGAGGTCTTGACCTGCCTTGTCTAAAGATTATGAATTTTGTGA  
TTGTGTTTGAAGACAAAAAGACAAGAAAAGAAATTTTAAAGAAATGGGGAGAGCTGCCCAT  
CAAGTTCCTGGTTTTGATTATGCAGCTCATTGTCCTTCAAGTGATGAAGAT

>agapornis\_roseicollis-psittaciformes-mda5

ATGGCAGCGGAGTTGCGGGACGAGCGTTTCCTCTACATGATCTCGTGCTTCAGGCCGCGG  
CTGAAGCAGTTCATCCGGGTGCAGCCGGTGTGGACCGGCTCCCTTCCCTCAGCGCGGA  
GGACAGGGAGAGGGTGCGGGCGGCCGCGCTGCAACGGGGCGAGGTGGAAGGGGCGGA  
GGAGCTGCTGCGGGCCGTGGAGCGGGGACCCGCGGGTGTGGCTGGTTCCACGAGTTC  
TTGCAGGCGCTTGAGCAAGGCGGCTGCGGCATGGCCGCCTGCTACATGAACCCCAACCT  
CAGCCAGCTGCCCTCGCCGGCCGAGGAGGCCGATCACGACCTCTGCGTGCAATTGGTGC  
AGCTGCTTCACAGCACTCTCGTGGATAGTATGCGGACCATGCAGGTGGCCGAGAAGTGCC  
TCCAGATGGGCATCTTCCAGGATGAGGACCTGGATGGGATCCATACTGTTACTGACAGTC  
GTGGGAACAGAGAAGGTGCAAGGGAGCTATTGAGCAGATTAGTGCAGAAGAAAGATTGGT  
TCTCTCGTTTTTTGATTGCTCTGCGTGAAACCCAACATGGAAGCCTTGAGATGATTTAAGT  
GGAAATATAGGAGGAACAAAGGATAAACAAAATGGGATGAAGAACAGTACAAATGAAGAAA  
CAGAAGTTACAAGCCAACCAGCTTATGCCATAGTGGAGGATTTGAAGCAGCAGGAAAATGT  
GAATGATAGTTTCAGCAGTGAGAACAATTTATTGGAAACATCTGTTGGAAAGAATTCTGTAC  
TTTCAGAGTCAGATGTCTCTACAGGAGTTGGAAGTGTCAAGTAAGTGAATGAAAACCTGGG  
ACAGAGCCGCACAAGCAGTGATTCAGATGAAGAGGAG-----

AGCAGAGCTTCACCTGAGCCAGATCTGGTCCTGAGAGACTACCAGATGGAAGTTGCAAAG  
CCAGCACTGAATGGGGAGAATATCATAATATGTCTCCCTACAGGCAGTGGTAAAACAGAG  
TGGCTGTTTACATTACCAAAGATCATTTGGATAAAAAGAAAAGGGCATCAGAGCCTGGAAA  
AGCTATAGTCCTTGTTAATAAGGTACCATTGGTAGAACAGCATTTACGAAAGGAGTTTAGTC  
CCTTCCTGAAGCGCTGGTATCACATTATTGGTTTAAGTGGTGATTCTCAGCTGAAAATCTCA  
TTTCCTGAAGTTGTCAGAAGAAATGATGTCATCATCTGTACAGCACAGATCCTTGAGAATTC  
ACTGCTGAATGCAGACAAAGAGGATGAAGAAGGTGTCCACTTATCAGATTTTTCACTCATC  
ATTATTGATGAGTGTATCACACTCAAAAGGAAGGTGTCTACAACAATATAATGCGACGTTA  
CTTAAAAGAAAAAAGAAGAACAGAAAGTTGGCAAAAGAAAACAAACCGCTGATCCCACAG  
CCTCAGATTCTGGGACTTACAGCCTCACCTGGTGTAGGAGGTGCAACATCCTATTCCAAAG  
CTGAAGAACATATTCTGAAAATCTGTGCCAATCTTGATGCATGTAGAATCATGACTGTTGAG  
AAGCACGCCTCCCAGCTGAAGAATCAGGTGAAGGAACCTTTTAAGAAGACTGTGATTGCAG  
ATGACAAAAAAGGGATCCATTTAGAGAGAGAATAACTGAGATCATGACAGAGATTCAAAA  
CTATTGCGAGCTTCATCCAAAATCTGAGTTTGGAACTCAGCCATATGAACAGTGGGTGATC  
AGAGAAGAGAAAAAAGCTGCAAAAGAAGAAAAACGCAAGGAACGTGTCTGTGCAGAACAC  
CTGAAGAAATATAATGATGCTCTCCAGATAAATGATACCATCCGAATGGTAGATGCATACAA  
TCACCTGAATAACTTTTATAAGGATGAGAAAAAGTAAGAAAGCAGTAAGGAGTGATGATGAT

GATGCACCAGCAGTATCAAAACAGGATGAAACAGATTTATTTCTAATAGGTTTATTTACGCG  
AAAAAAGAAACAGCTGAAAGAGTTGGCTAGAATGCCAGAATATGAAAATGAGAAGCTAACA  
CAGTTGCGAAACACTTTAATGGAGGAGTTCACGAAGACTGAGGCACCTAGAGGAATTATTT  
TCACAAAGACCCGGCTAAGTGCCTTTGCTTTATTCCAGTGGATTAAGGATAACCCAAAATTT  
GAAGAAGTGGGAATTAAGGCCATTATCTTATTGGTGCTGGACATAACAGTGAAATGAAAC  
CCATGACTCAGAATGAGCAACGGGAAGTTATTGATAAATCCGAGCTGGAAATTTGAATTTA  
CTTATTGCTACTACTGTAGCTGAGGAAGGCCTAGACATCAAAGAGTGTAACATTGTTATTCTG  
CTATGGCCTTGTACCAATGAAATTGCTATGGTGAGGCTCGTGGTCGAGCTCGATCTGAT  
GAGAGCACCTATGCACTTGTGGCTTCAAGTGGCTCAGGAGCTGTTGAACGTGAAGATGTTA  
ATATTTTCCGTGAGAAAATGATGTATAAAGCCATTGAGAATGTCCAGAAGATGTCACAGGAA  
GAGTATATAAAGAAGATTCTGAATTTCCAGTGTCAAAGTATAGTGGAAGAAAGAAATGAAGGC  
AAAAAGACATCAGCACAAGACATACAAGAAAAATCCTTCACTAATAACATTCTATGCAAAA  
ATTGCCACAAGCTGGTATGTTCTGGGGAAGACATACGAGTTATTGAAAACATGCATCATGT  
CAGTGTGAAAAGAGATTTCCAAAGTCTTACCATACAAGAGAAAATAAGACACTGCAAGATA  
AGAATGCTGATTGCCAGACAAATGGAGAAGTTATATGTAAAGATTGTGGACAAGCTTGGGG  
AAATATGATGGTTCACCGAGGCCTTGACCTGCCTTGTCTAAAAATTACAAATTTTGTGATTG  
TGTTTGAAGACAAGAAGACAAGAAAAGAAATTTTAAAGAAATGGAGAGAGCTGCCCCATCAA  
GTTCCCTGGTTTTGATTATGCAGCTCATTGTCCTTCAAGTGATGAAGAT

>amazona\_aestiva-psittaciformes-mda5

ATGGCAGGGGAGTTGCGAGACGAGCGGTTCTCTACATGATCTCGTGCTTCAGGCCGCG  
GCTGAAGCAGTTCATCCGAGTGCAGCCGGTGCTGGACCGGCTCCCTTCGCTCAGCGCGG  
AGGACAGGGAGAAGGTGCGGGCGACCGCGCTGCAGCGGGGCGAGGTGGAAGGGGCGG  
AGGAGCTGCTGCGGGCCGTGGAGCGGGGGCCCCGCGGGTGTGGCTGGTTCCACGAGTT  
CTTGACAGGCGCTGGAGCACGGCGGCTGCGGCATGGCCGCTTGCTACGTGAACCCCAGCC  
TCAGCCAGCTGCCCTCGCCGGCTGAGGAGGCCGACCACGACCTCTGCGTGCATTTGGTG  
CAGCTGCTTCATAGCACGCTCGTGGATAGTATGCGGACCGTGCAGGTGGCCGAGAAGTGC  
CTGCAGATGGGCATCTTCCAGGATGAGGACCTGGATGGGATCCATACTGTTNCTGAAAATC  
GTGGGAACAGAGAAGGTGCAAGAGAGCTATTGAGCAGATTAGTGCAGAAGAAAGATTGGT  
TCTCTCGGTTTTTTGATTGCTCTGCGTGAAACCCAACATGGAAGCCTTGACAGATGATTTAAGT  
GGAAATATAGGAGGAACAAAGGATAAACAATAATGGGATGAAGAACAGTACAAANAAAGAAA  
CAGAAGTTACAAGCCAACCAGATTATGCCATACTGGAGGATTTGAAGCAGCAGGAAAATAT  
GAACGATAATTTGAGCAGTGAGAACAATTTATTGAAACATCTATTGGAAAGAATTCTGTAG  
TTTCA-----

GGATTTGGAAGTGTGAGTAACTTGAATGAAAACCTGGGACAGAGCTGCACAAGCAGTGATT  
CAGATGAAGAGGAG-----

AGCAGAGCTTCACCTGAGCCAGATCTGGTCCTGAGAGATTACCAGATGGAAGTTGCAAAG  
CCAGCACTGAATGGGGAGAATATTATAATATGTCTCCCTACAGGCAGTGGTAAAACCAGAG  
TGGCTGTTTACATTACCAAAGATCATTTGGATAAAAAGAAAAGAGCATCAGAGCCTGGAAAA  
GTTATAGTCCTTGTTAATAAGGTACCTTTGGTAGAACAGCATTTACGAAAGGAGTTTAGTCC  
ATTCTGAAGCGCTGGTATCACGTTATTGGTTTAAAGTGGTGATTCTCAGCTGAAAATCTCAT  
TTCCTGAAGTTGTGAGAAGAAATGATGTCATCATCTGTACAGCACAGATCCTTGAGAATTCA  
CTACTAAACGCAGACAAAGAAGATGAAGAAGGTGTCCGCTTATCAGATTTTTCACTCATCAT  
TATTGATGAGTGTGATCACAACCTCAAAGGAAGGTGTCTACAACAACATAATGCGACGTTACT  
TGAAAGAAAAAAGAAGAAGAGGCTGGCAAAAGAAAACAAACCACTGATCCCTCAGCC

TCAGATTCTGGGACTTACAGCCTCACCTGGTGTAGGAGGTGCAACATCCTATTCCAAAGCT  
GAAGAACATATTCTGAAAATCTGTGCTAATCTTGATGCATGTAGCATCATGACTGTTGAGGA  
GCATGCCTCCCAGCTGAAGAATCAGGTGAAGGAACCTTTTAAGAAGACTGTGATTGCAGAT  
GACAATAAAAAGGATCCATTTAGAGAGAGAATAACTGAGATCATGACAGAGATTCAAAACTA  
TTGCCAGCTTCATCCAAAATCTGAGTTTGGAACCTCAGCCATATGAGCAGTGGGTGATTAGA  
GAAGAGAAAAAGCTGCAAAAGAAGAAAAACGCAAGGAACGTGTCTGTGCAGAACACCTG  
AAGAAATATAATGATGCTCTCCAGATAAATGATGCCATCCGAATGGTAGATGCATACAATCA  
CCTGAATAACTTTTATAAGGATGAGAAAAGTAAGAAGACAGAAAGGAGTGATGATGATGAT  
GCACCAGCAGTATCAAAACAGGACGAAACAGATTTATTTCTAATAGGTTTATTTTCATGCAAA  
AAAGAAACAGCTGAAAGAGTTGGCTAGAATGCCAGAATATGAAAATGAAAAGCTAACACAG  
TTGCGAAACACTTTAATGGAGGAGTTCACGAAGACTGAGGCACCTAGAGGAATTATTTTCA  
CAAAGACCCGGCTAAGTGCTTTTGCTCTATTCCAGTGGATTAAAGATAACCCAAAATTTGAA  
GAAGTGCGNATTAAGGCCATTATCTTATTGGTGTCTGGACATAGCAGTGAAACGAAACCCA  
TGACTCAGAATGAGCAGCGGGAAGTTATTGATAAATTCGAGGTGGAAATTTGAATTTACTT  
ATTGCTACTACTGTAGCTGAGGAAGGCCTAGACATCAAAGAGTGTAACATTGTTATTCGCTA  
TGGCCTCGTCACCAATGAAATTGCTATGGTGCAGGCTCGTGGTCGAGCTCGAGCTGATGA  
CAGCACCTATGCACTTGTGGCTTCGAGTGGCTCAGGAGCTGTTGAACGTGAAGATGTTAAT  
ATTTTCCGTGAGAAAATGATGTATAAAGCCATTACAGCATGTCCAAAAGATGCCACAGGAGG  
AGTATTTAAAGAAGATTCAGAATTACCAGTGTCAAAGTATAGTGGAAGAAAGAAATGAAGGCA  
AAGAGACTTCAGCANAAGACATACAAGAAAAATGCTTCACTAATAACATTCCTATGCAAAAA  
TTGCCACAAGCTGGTATGTTCTGGGGAAGATATACGAGTTATTGAAAACATGCATCATGTC  
AGTGTGAAAAGAGATTTCCAAAGTCTTTACCATACAAGAGAAAATAAGACGCTGCAAGATAA  
GAATGCTGATTACCAGACAAATGNAGAAGTTATATGTAAAGATTGTGGACAAGCTTGGGGA  
AATATGATGGTTACCGAGGTCTTGACCTGCCTTGTCTAAAGATTATGAATTTTGTGATTGT  
GTTTGAAGACAAGAAG---

ACAAAAGAAATTTTAAAGAAATGGAGAGAGCTGCCCATCGAGTTCCTGGTTTTGATTATGC  
AGCTCATTGTCTTCAAGTGATGAAGAT

>pyrrhura\_perlata-psittaciformes-mda5

ATGGCAGAGGACTTGCGAGACGAGCGGTTCTCTACATGATCTCGTGCTTCAGGCCGCGG  
CTGAAGCAGTTCATCCGAGTGACGCCGGTGCTGGACCGGCTCCCTTCGCTCAGCGCGGA  
CGACAGGGAGAAGGTGCGGGCGGGCCGCGCTGCAGCGGGGCGAGGTGGAAGGGGCGGA  
GGAGCTGCTGCGGGCCGTGGAGCGCGGGCCCCGCGGGTGTGGCTGGTTCCACGAGTTC  
TTGCAGGCGCTGGAGCATGGCGGCTGCGGCATGGCCGCTTGCTACGTGAACCCAGCCT  
CAGCCAGCTGCCCTCGCCGGCTGAGGAGGCCGACCACGACCTCTGCGTGCATTTGGTGC  
AGCTGCTCCATAGCACGCTCGTGGATAGTATGCGGACCGTGCAGGTGGCCGAGAAGTGC  
CTGCAGATGGGCATCTTCCAGGATGAGGACCTGGATGGGATCCATACTGTTACTGAGAAT  
CGTGGGAACAGAGAAGGTGCAAGGGAGCTATTGAGCAGATTAGTGCAGAAGAAAGATTGG  
TTCTCTCGGTTTTTTGATTGCTCTGCGTGAAACCCAACATGGAGGCCTTGCTGATGATTTAAG  
TGGAATACAGGAGGAACAAAGGATAAACAAAATGGGATGAAGAACAGTACAAACAAAGAA  
ATAGAAGTTACAAGCCAACCAGGTATGCCATACTGGAGGATTTGAAGCAGCAGGAAAATA  
TGAATGATAGTTTCAGCAGTGAGAACAAATTTATTGGAACATCTATTGGAAGAATTCTTTA  
GTTTCAGAGTCAGATGTCTCTATAGGATTTGGAAGTGTGAGTAACTTGAATGAAAACCTGG  
GACAGAGCTGCACAAGCAGTGATTCAGATGAAGAGGAG-----

AGCAGAGCTTCACCTGAGCCAGATCTGGTCCTGAGAGATTACCAGATGGAAGTTGCAAAG

CCAGCACTGAATGGGGAGAATATTATAATATGTCTCCCTACAGGCAGTGGTAAAACAGAG  
TGGCTGTTTACATTACCAAAGATCATTTGGATAAAAAGAAAAGAGCATCAGAGCCTGGAAAA  
GTTATAGTCCTTGTTAATAAGGTACCATTGGTAGAACAGCATTTACGAAAGGAGTTTAGTCC  
ATTCCTGAAGCGCTGGTATCACATTATTGGTTTAAGTGGTGATTCTCAGCTGAAAATCTCAT  
TTCCTGAAGTTGTCAGAAGAAATGATGTCATCATCTGTACAGCACAGATCCTTGAGAATTCA  
CTGCTAAATGCAGACAAAGAAGATGAAGAAGGTGTCCACTTATCAGATTTTTCACTCATCAT  
TATTGATGAGTGTCATCACACTCAAAAGGAAGGTGTCTACAACAACATAATGCGACGTTACT  
TAAAAGAAAAGAAGAAGAACAGGAAGCTGGCGAAAAGAAAACAAACCACTGATCCCGCAGC  
CTCAGATTCTGGGACTTACAGCCTCACCTGGTGTAGGAGGTGCAACATCCTATTCCAAAGC  
TGAAGAACATATTCTGAAAATCTGTGCTAATCTTGATGCATGTAGAATCATGACTGTTGAGG  
AGCATGCCTCCCAGCTGAAGAATCAGGTGAAGGAACCTTTTAAGAAGACTGTGATTGCAGA  
TGACAAAAAAAAGGATCCATTTAGAGAGAGAGTAAGTGAATCATGACAGAGATTCAAAAC  
TATTGCCAGCTTCATCCAAAATCTGAGTTTGGAACTCAGCCATATGAGCAGTGGGTGATTA  
GAGAAGAGAAAAAAGCTGCAAAAGAAGAAAAACGCAAGGAACGTGTCTGTGCAGAACACC  
TGAAGAAATACAATGATGCTCTCCAGATAAATGATACCATCCGAATGGTAGATGCGTACAAT  
CACCTGAATAACTTTTATAAGGATGAGAAAAGTAAGAAGACAGAAAGGAGTGATGATGACG  
ATGCACCAGCAGTATCAAAACAGGATGAAACAGATTTATTTCTAATAGGTTTATTTTCATGCA  
AAAAAGAAACAGCTGAAAGAGTTGGCTAGAATGCCAGAATATGAAAATGAAAAGCTAACAC  
AGTTGCGAAACACTTTAATGGAGGAGTTCACGAAGACTGAGGCACCTAGAGGAATTATTTT  
CACAAAGACCCGGCTAAGTGCTTTTGCTCTATTCCAGTGGATTAAGGATAACCCAAAATTTG  
AAGAAGTGGGAATTAAGGCCCATATCTTATTGGTTCTGGACATAACAGTGAAATGAAACC  
CATGACTCAGAATGAGCAGCGAGAAGTTATTGATAAATTCGAGGTGGAAATTTGAATTTAC  
TTATTGCTACTACTGTAGCTGAGGAAGGCCTAGACATCAAAGAGTGTAACATTGTTATTCGC  
TATGGCCTCGTCACCAATGAAATTGCTATGGTGCAGGCTCGTGGTTCGAGCTCGAGCTGAT  
GACAGCACCTATGCACTTGTGGCTTCAAGTGGCTCAGGAGCTGTTGAACGTGAAGATGTTA  
ATATTTTCCGTGAGAAAATGATGTATAAAGCCATTCAGCATGTCCAGAAGATGCCACAGGA  
GGAGTATTTAAAGAAGATTCAGAATTACAGTGTCAAAGTATAGTGGAAGAAAGAAATGAAG  
GCAAAGAGACATCAGCACAAAGACATACAAGAAAAATCCTTCACTGATATCATTCTATGCAA  
AAATTGCCACAAGCTGGTATGTTCTGGGGAAGACATACGAGTTATTGAAAACATGCATCAT  
GTCAGTGTGAAAAGAGATTTCCAAAGTCTTTACCATACAAGAGAAAATAAGACGCTGCAAG  
ATAAGAATGCTGATTACCAGACAAATGGAGAAGTTATATGTAAAGATTGTGGACAAGCTTG  
GGGAAATATGATGGTTCACCGAGGTCTTGATCTGCCTTGCTAAAGATTATAAATTTTGTGA  
TTGTGTTTGAAGACAAGAAAACAAGAAACGAAATTTTAAAGAAATGGGGAGAGCTGCCCCAT  
CAAGTTCCTGGTTTTGATTATGCAGCTCATTGTCCTTCAAGTGATGAAGAT

>eupsittula\_pertinax-psittaciformes-mda5

ATGGCAGAGGAGTTGCGAGACGAGCGGTTCTCTACATGATCTCGTGCTTCAGGCCGCGG  
CTGAAGCAGTTCATCCGAGTGACGCCGGTGCTGGACCGGCTCCCTTCGCTCAGCGCGGA  
CGACAGGGAGAAGGTGCGGGCGGCCGCGCTGCAGCGGGGCGAGGTGGAAGGGGCGGA  
GGAGCTGCTGCGGGCCGTGGAGCGGGGGCCCCGCGGGTGTGGCTGGTTCCACGAGTTC  
TTGCAGGCGCTGGAGCACGGCGGCTGTGGCATGGCCGCTTGCTACGTGAACCCAGCCT  
CAGCCAGCTGCCCTCGCCGGCTGAGGAGGCCGACCACGACCTCTGCGTGCAATTTGGTGC  
AGCTGCTCCATAGCACGCTCGTGGATAGTATGCGGACCGTGACAGGTGGCCGAGAAGTGC  
CTGCAGATGGGCATCTTCCAGGATGAGGACCTGGATGGGATCCATACTGTTACTGACAATC  
GTGGGAACAGAGAAGGTGCAAGGGAGCTATTGAGCAGATTAGTGCAGAAGAAAGATTGGT

TCTCTCGGTTTTTATTGCTTTGCGTGAAACCCAACATGGAGGCCTTGCAGATGATTTAAGT  
GGAAATACAGGAGGAACAAAGGATAAACAAAATGGGATGAAGAACAGTACAAACAAAGAAA  
TAGAAGTTACAAGCCAACCAGGTTATGCCATACTGGAGGATTTGAAGCAGCAGGAAAATAT  
GAATGATAGTTTTAGCAGTGAGAACAATTTATTGAAACATCTATTGGAAAGAATTCTTTAG  
TTTCAGAGTCAGATGTCTCTATAGGATTTGGAAGTGTGAGTAACCTTGAATGAAAACCTGGGA  
CAGAGCTGCACAAGCAGTGATTCAGATGAAGAGGAG-----

AGCAGAGCTTCACCTGAGCCAGATCTGGTCCTGAGAGATTACCAGATGGAAGTTGCAAAG  
CCAGCACTGAATGGGGAGAATATTATAATATGTCTCCCTACAGGCAGTGGTAAAACCAGAG  
TGGCTGTTTACATTACCAAAGATCATTTGGATAAAAAAGAAAAGAGCATCAGAGCCTGGAAAA  
GTTATAGTCCTTGTTAATAAGGTACCATTGGTAGAACAGCATTTACGAAAGGAGTTTAGTCC  
ATTCCTGAAGCGCTGGTATCACATTATTGGTTTAAGTGGTGATTCTCAGCTGAAAATATCAT  
TTCCTGAAGTTGTCAGAAGAAATGATGTCATCATCTGTACAGCACAGATCCTTGAGAATTCA  
CTGCTAAATGCAGACAAAGAAGATGAAGAAGGTGTCCACTTATCAGATTTTTCACTCATCAT  
TATTGATGAGTGTGTCACACTCAAAAGGAAGGTGTCTACAACAACATAATGCGACGTTACT  
TAAAAGAAAAGAAGAAGAACAGGAAGCTGGCAAAAGAAAACAAACCACTGATCCCGCAGC  
CTCAGATTCTGGGACTTACAGCCTCACCTGGTGTAGGAGGTGCAACATCCTATTCCAAAGC  
TGAAGAACATATTCTGAAAATCTGTGCTAATCTTGATGCATGTAGAATCATGACTGTTGAGG  
AGCATGCCTCCCAGCTGAAGAATCAGGTGAAGGAACCTTTTAAGAAGACTGTGATTGCAGA  
TGACAAAAAAAAGGATCCATTTAGAGAGAGAGTAAGTGAATCATGACAGAGATTCAAAAC  
TATTGCCAGCTTCATCCAAAATCTGAGTTTGGAACTCAGCCATATGAGCAGTGGGTGATTA  
GAGAAGAGAAAAAAGCTGCAAAAGAAGAAAAACGCAAGGAACGTGTCTGTGCAGAACACC  
TGAAGAAATACAATGATGCTCTCCAGATAAATGATACCATCCGAATGGTAGATGCGTACAAT  
CACCTGAATAACTTTTATAAGGATGAGAAAAGTAAGAAGACAGAAAGGAGTGATGATGACG  
ATGCACCAGCAGTATCAAAACAGGATGAAACAGATTTATTTCTAATAGGTTTATTTTCATGCA  
AAAAAGAAACAGCTGAAAGAGTTGGCTAGAATGCCAGAATATGAAAATGAAAAGCTAACAC  
AGTTGCGAAACACTTTAATGGAGGAGTTCACGAAGACTGAGGCACCTAGAGGAATTATTTT  
CACAAAGACCCGGCTAAGTGCTTTTGGCCTATTCCAGTGGATTAAGGATAACCCAAAATTT  
GAAGAAGTGGGAATTAAGGCCATTATCTTATTGGTTCTGGACATAACAGTGAAATGAAAC  
CCATGACGCAGAATGAGCAGCGGGAAGTTATTGATAAATCCGAGGTGGAAATTTGAATTT  
ACTTATTGCTACTACTGTAGCTGAGGAAGGCCTAGACATCAAAGAGTGTAACATTGTTATTC  
GCTATGGCCTCGTCACCAATGAAATTGCTATGGTGCAGGCTCGTGGTTCGAGCTCGAGCTG  
ATGACAGCACCTATGCACTTGTGGCTTCGAGTGGCTCAGGAGCTGTTGAACGTGAAGATG  
TTAATATTTTCCGTGAGAAAATGATGTATAAAGCCATTGAGCATGTCCAGAAGATGCCACAG  
GAGGAGTATTTAAAGAAGATTGAGAATTACAGTGTCAAAGTATAGTGGAAAAAGAAATGAA  
GGCAAAGAGACATCAGCACAAGACATACAAGAAAAATCCTTCACTAATATCATTCTATGCA  
AAAATTGCCACAAGCTGGTATGTTCTGGGGAAGATATACGAGTTATTGAAAACATGCATCAT  
GTCAGTGTGAAAAGAGATTTCCAAAGTCTTTACCATACAAGAGAAAATAAGACGCTGCAAG  
ATAAGAATGCTGATGACCAGACAAATGGAGAAGTTATATGTAAAGATTGTGGACAAGTTTG  
GGGAAATATGATGGTTCACCGAGGTCTTGATCTGCCTTGTCTAAAGATTATAAATTTTGTGA  
TTGTGTTTGAAGACAAGAAAACAAGAAAAGAAATTTTAAGAATGGAGAGAGCTGCCCATC  
AAGTTCCTGGTTTTTATTATGCAGCTCATTGTCTTCAAGTGATGAAGAT

>guaruba\_guarouba-psittaciformes-md5

ATGGCAGAGGAGTTGCGAGACGAGCGGTTCTCTACATGATCTCGTGCTTCAGGCCGCGG  
CTGAAGCAGTTCATCCGAGTGCAGCCGGTGCTGGACCGGCTCCCTTCGCTCAGCGCGGA

CGACAGGGAGAAGGTGCGGGCGGCCGCGCTGCAGCGGGGCGAGGTGGAAGGGGCGGA  
GGAGCTGCTGCGGGCCGTGGAGCGGGGGCCCCGCGGGTGTGGCTGGTTCCACGAGTTC  
TTGCAGGCGCTGGAGCACGGCGGCTGTGGCATGGCCGCTTGCTACGTGAACCCCAACCCT  
CAGCCAGCTGCCCTCGCCAGCTGAGGAGGCCGACCACGACCTCTGCGTGCATTTGGTGC  
AGCTGCTCCATAGCACGCTCGTGGATAGTATGCGGACCGTGCAGGTGGCCGAGAAGTGC  
CTGCAGATGGGCATCTTCCAGGATGAGGACCTGGATGGGATCCATACTGTTACTGACAATC  
GTGGGAACAGAGAAGGTGCAAGGGAGCTATTGAGCAGATTAGTGCAGAAGAAAGATTGGT  
TCTCTCGGTTTTTGATTGCTTTGCGTGAAACCCAACATGGAGGCCTTGACAGATGATTTAAGT  
GGAAATACAGGAGGAACAAAGGATAAAACAAAATGGGATGAAGAACAGTACAAACAAAGAAA  
TAGAAGTTACAAGCCAACCAGGTTATGCCATACTGGAGGATTTGAAGCAGCAGGAAAATAT  
GAATTATAGTTTCAGCAGTGAGAACAAATTTATTGGAAACATCTATTGGAAAGAATTCTTTAGT  
TTCAGAGTCAGATGTCTCTATAGGATTTGGAAGTGTCAGTAACTTGAATGAAAACCTGGGA  
CAGAGCTGCACAAGCAGTGATTGAGATGAAGAGGAG-----  
AGCAGAGCTTCACCTGAGCCAGATCTGGTCCTGAGAGATTACCAGATGGAAGTTGCAAAG  
CCAGCACTGAATGGGGAGAATATTATAATATGTCTCCCTACAGGCAGTGGTAAAACCAGAG  
TGGCTGTTTACATTACCAAAGATCATTTGGATAAAAAAGAAAAGAGCATCAGAGCCTGGAAAA  
GTTATAGTCCTTGTTAATAAGGTACCATTGGTAGAACAGCATTTACGAAAGGAGTTTAGTCC  
ATTCTGAAGCGCTGGTATCACATTATTGGTTTAAGTGGTGAATTCTCAGCTGAAAATATCAT  
TTCCTGAAGTTGTCAGAAGAAATGATGTCATCATCTGTACAGCACAGATCCTTGAGAATTCA  
CTGCTAAATGCAGACAAAGAAGATGAAGAAGGTGTCCACTTATCAGATTTTTCACTCATCAT  
TATTGATGAGTGTCATCACACTCAAAAGGAAGGTGTCTACAACAACATAATGCGACGTTACT  
TAAAAGAAAAGAAGAAGAACAGGAAGCTGGCAAAAGAAAACAAACCACTGATCCCGCAGC  
CTCAGATTTTGGGACTTACAGCCTCACCCGGTGTAGGAGGTGCAACATCCTATTCCAAAGC  
TGAAGAACATATTCTGAAAATCTGTGCTAATCTTGATGCATGTAGAATCATGACTGTTGAGG  
AGCATGCCTCCCAGCTGAAGAATCAGGTGAAGGAACCTTTTAAGAAGACTGTGATAGCAGA  
TGACAAAAAAAAGGATCCATTTAGAGAGAGAGTAAGTGAATCATGACAGAGATTCAAAAC  
TATTGCCAGCTTCATCCAAAATCTGAGTTTGGAAGTCAAGCATATGAGCAGTGGGTGATTA  
GAGAAGAGAAAAAAGCTGCAAAAGAAGAAAAACGCAAGGAACGTGTCTGTGCAGAACACC  
TGAAGAAATACAATGATGCTCTCCAGATAAATGATACCATCCGAATGGTAGATGCGTACAAT  
CACCTGAATAACTTTTTATAAGGATGAGAAAAGTAAGAAGACAGAAAGGAGTGATGATGACG  
ATGCACCAGCAGTATCAAAACAGGATGAAACAGATTTATTTCTAATAGGTTTATTTTCATGCA  
AAAAAGAAACAGCTGAAAGAGTTGGCTAGAATGCCAGAATATGAAAATGAAAAGCTAACAC  
AGTTGCGAAACACTTTAATGGAGGAGTTCACGAAGACTGAGGCACCTAGAGGAATTATTTT  
CACAAAGACCCGGCTAAGTGCTTTTGCTCTATTCCAGTGGATTAAGGATAACCCAAAATTTG  
AAGAAGTGGAATTAAGGCCCATATCTTATTGGTCTGGACATAACAGTGAAATGAAACC  
CATGACGCAGAATGAGCAGCGGGAAGTTATTGATAAATTCCGAGGTGGAAATTTGAATTTA  
CTTATTGCTACTACTGTAGCTGAGGAAGGCCTAGACATCAAAGAGTGTAACATTGTTATTG  
CTATGGCCTCGTCACCAATGAAATTGCTATGGTGCAGGCTCGTGGTCGAGCTCGAGCTGA  
TGATAGCACCTATGCACTTGTGGCTTCGAGTGGCTCAGGAGCTGTTGAACGTGAAGATGTT  
AATATTTTCCGTGAGAAAATGATGTATAAAGCCATTGAGCATGTCCAGAAGATGCCACAGG  
AGGAGTATTTAAAGAAGATTCAGAATTACCAGTGTCAAAGTATAGTAGAAAAAGAAATGAAG  
GCAAAGAGACATCAGCACAAAGACATAACAAGAAAAATCCTTCACTAATATCATTCTATGCAA  
AAATTGCCACAAGCTGGTATGTTCTGGGGAAGACATACGAGTTATTGAAAACATGCATCAT  
GTCAGTGTGAAAAGAGATTTCCAAAGTCTTTACCATACAAGAGAAAATAAGACGCTGCAAG



ATAAGAATGCTGATTACCCGACAAATGGAGAAGTTATATGTAAAGATTGTGGACAAGCTTG  
GGGAAATATGATGGTTCACCGAGGTCTTGATCTGCCTTGTCTAAAGATTATAAATTTTGTGA  
TTGTGTTTGAAGACAAGAAAACAAGAAAAGAAATTTTAAAGAAATGGAGAGAGCTGCCCATC  
AAGTTCCTGGTTTTGATTATGCAGCTCATTGTCCTTCAAGTGATGAAGAT

>ara\_ararauna-psittaciformes-mda5

ATGGCAGAGGAGTTGCGAGACGAGCGGTTCTCTACATGATCTCGTGCTTCAGGCCGCGG  
CTGAAGCAGTTCATCCGAGTGCAGCCGGTGTGACCCGGCTCCCTTCGCTCAGCGCGGA  
CGACAGGGAGAAGGTGCGGACGGCCGCGCTGCAGCGGGGCGAGGTGGAAGGGGCGGA  
GGAGCTGCTGCGGGCCGTGGAGCGGGGGCCCCGCGGGTGTGGCTGGTTCCACGAGTTC  
TTGCAGGCGCTGGAGCACGGCGGCTGTGGCATGGCCGCTTGCTACGTGAACCCAGCCT  
CAGCCAGCTGCCCTCGCCGGCTGAGGAGGCCGACCACGACCTCTGCGTGCATTTGGTGC  
AGCTGCTGCATAGCACGCTCGTGGATAGTATGCGGACCGTGCAGGTGGCCGAGAAGTGC  
CTGCAGATGGGCATCTTCCAGGATGAGGACCTGGATGGGATCCATACTGTTACTGACAATC  
GTGGGAACAGAGAAGGTGCAAGGGAGCTATTGAGCAGATTAGTGCAGAAGAAAGATTGGT  
TCTCTCGGTTTTTTGATTGCTCTGCGTGAAACCCAACATGGAGGCCTTGCAGATGATTTAAG  
TGGAATACAGGAGGAACAAAGGATAAACAAAATGGGATGAAGAACAGTACAAACAAAGAA  
ATGGAAGTTACAAGCCAACCAGGTTATGCCATACTGGAGGATTTGAAGCAGCAGGAAAATA  
TGAATGATAGTTTCAGCACTGAGAACAATTTATTGGAAACATCTATTGGAAAGAATTCTTTA  
GTTTCAGAGTCAGATGTCTCTATAGGATTTGGAAGTGTGAGTAACCTTGAATGAAAACCTGG  
GACAGAGCTGCACAAGCAGTGATTCAGATGAAGAGGAG-----

AGCAGAGCTTCACCTGAGCCAGATCTGGTCCTGAGAGATTACCAGATGGAAGTTGCAAAG  
CCAGCACTGAATGGGGAGAATATTATAATATGTCTCCCTACAGGCAGTGGTAAAACCAGAG  
TGGCTGTTTACATTACCAAAGATCATTTGGATAAAAAGAAAAGAGCATCAGAGCCTGGAAAA  
GTTATAGTCCTTGTTAATAAGGTACCATTGGTAGAACAGCATTTACGAAAGGAGTTTAGTCC  
ATTCCTGAAGCGCTGGTATCACATTATTGGTTTAAAGTGGTGATTCTCAGCTGAAAATCTCAT  
TTCCTGAAGTTCTCAGAAGAAATGATGTCATCATCTGTACAGCACAGATCCTTGAGAATTCA  
CTGCTAAATGCAGACAAAGAAGATGAAGAAGGTGTCCACTTATCAGATTTTTCACTCATCAT  
TATTGATGAGTGTGTCATCACTCAAAAGGAAGGTGTCTACAACAACATAATGCGACGTTACT  
TAAAAGAAAAGAAGAAGAACAGGAAGCTGGCAAAAGAAAACAAACCACTGATCCCGCAGC  
CTCAGATTCTGGGACTTACAGCCTCACCTGGTGTAGGAGGTGCAACATCCTATTCCAAAGC  
TGAAGAACATATTCTGAAAATCTGTGCTAATCTTGATGCATGTAGAATCATGACTGTTGAGG  
AGCATGCCTCCCAGCTGAAGAATCAGGTGAAGGAACCTTTTAAGAAGACTGTGATTGCAGA  
TGACAAAAAAAAGGATCCATTTAGAGAGAGAGTAACTGAGATCATGACAGAGATTCAAAAC  
TATTGCCAGCTTCATCCAAAATCTGAGTTTGGAACTCAGCCATATGAGCAGTGGGTGATTA  
GAGAAGAGAAAAAAGCTGCAAAAGAAGAAAAACGCAAGGAACGTGTCTGTGCAGAACACC  
TGAAGAAATACAATGATGCTCTCCAGATAAATGATACCATCCGAATGGTAGATGCGTACAAT  
CACCTGAATAACTTTTATAAGGATGAGAAAAGTAAGAAGACAGAAAGGAGTGATGATGACG  
ATGCACCAGCAGTATCAAAACAGGATGAAACAGATTTATTTCTAATAGGTTTATTTTCATGCA  
AAAAAGAAACAGCTGAAAGAGTTGGCTAGAATGCCAGAATATGAAAATGAAAAGCTAACAC  
AGTTGCGAAACACTTTAATGGAGGAGTTCACGAAGACTGAGGCACCTAGAGGAATTATTTT  
CACAAAGACCCGGCTAAGTGCTTTTGTCTGTTCAGTGGATTAAGGATAACCCAAAATTT  
GAAGAAGTGGGAATTAAGGCCATTATCTTATTGTTCTGGACATAACAGTGAAATGAAAC  
CCATGACTCAGAATGAGCAGCGGGAAGTTATTGATAAATTCCGAGGTGGAAATTTGAATTT  
ACTTATTGCTACTACTGTAGCTGAGGAAGGCCTAGACATCAAAGAGTGTAACATTGTTATTC

GCTATGGCCTCGTCACCAATGAAATTGCTATGGTGCAGGCTCGTGGTTCGAGCTCGAGCTG  
ATGACAGCACCTATGCACTTGTGGCTTCGAGTGGCTCAGGAGCTGTTGAACGTGAAGATG  
TTAATATTTTCCGTGAGAAAATGATGTATAAAGCCATTTCAGCATGTCCAGAAGATGCCACAG  
GAGGAGTATTTAAAGAAGATTCAGAATTACCAAGTGTCAAAGTATAGTGGAAAAAGAAATGAA  
GGCAAAGAGACATCAGCACAAGACATACAAGAAAAATCCTTCACTAATATCATTCTATGCA  
AAAATTGCCACAAGCTGGTATGTTCTGGGGAAGACATACGAGTTATTGAAAACATGCATCA  
TGTCAGTGTGAAAAGAGATTTCCAAAGTCTTTACCATACAAGAGAAAAATAAGACGCTGCAA  
GATAAGAATGCTGATTACCAGATAAATGGAGAAGTTATATGTAAAGATTGTGGACAAGCTTG  
GGGAAATATGATGGTTCACCGAGGTCTTGATCTGCCTTGTCTAAAGATTATAAATTTTGTGA  
TTGTGTTTGAAGACAAGAAA---

AGAAAAGAAATTTTAAAGAAATGGAGAGAGCTGTCCATCAAGTTCCCTGGTTTTGATTATGC  
AGCTCATTGTCTTCAAGTGATGAAGAT

>aratinga\_solstitialis-psittaciformes-md5

ATGGCAGAGGAGTTAAGAGACGAGCGGTTCTCTACATGATCTCGTGCTTCAGGCCGCGG  
CTGAAGCAGTTCATCCGAGTGCAGCCGGTGCTGGACCGGCTCCCTTCGCTCAGCGCGGA  
CGACAGGGAGAAGGTGCGGACGGCCGCGCTGCAGCGGGGCGAGGTGGAAGGGGCGGA  
GGAGCTGCTGCGGGGCCGTGGAGCGGGGGCCCCGCGGGTGTGGCTGGTTCCACGAGTTC  
TTGCAGGCGCTGGAGCACGGCGGCTGTGGCATGGCCGCTTGCTACGTGAACCCAGCCT  
CAGCCAGCTGCCCTCGCCGGCTGAGGAGGCCGACCACGACCTCTGCGTGCATTTGGTGC  
AGCTGCTCCATAGCACGCTCGTGGATAGTATGCGGACCGTGCAGGTGGCCGAGAAGTGC  
CTGCAGATGGGCATCTTCCAGGATGAGGACCTGGATGGGATCCATACTGTTACTGACAATC  
GTGGGAACAGAGAAGGTGCAAGGGAGCTATTGAGCAGATTAGTGCAGAAGAAAGATTGGT  
TCTCTCGGTTTTTATTGCTCTGCGTGAAACCAACATGGAGGCCTTGACAGATGATTTAAG  
TGGAATACAGGAGGAACAAAGGATAAACAATAATGGGATGAAGAACAGTACAAACAAGAA  
ATAGAAGTTACAAGCCAACCAGGTTATGCCATACTGGAGGATTTGAAGCAGCAGGAAAATA  
TGAATGATAGTTTCAGCAGTGAGAACAATTTATTGGAACATCTATTGGAAGAATMTTTA  
GTTTCAGAGTCAGATGTCTCTATAGGATTTGGAAGTGTGAGTAACCTGAATGAAAACCTGG  
GACAGAGCTGCACAAGCAGTGATTCAGATGAAGAGGAG-----

AGCAGAGCTTCACCTGAGCCAGATCTGGTCCTGAGAGATTACCAGATGGAAGTTGCAAAG  
CCAGCACTGAATGGGGAGAATATTATAATATGTCTCCCTACAGGCAGTGGTAAAACCAGAG  
TGGCTGTTTACATTACCAAAGATCATTTGGATAAAAAGAAAAGAGCATCAGAGCCTGGAAAA  
GTTATAGTCCTTGTTAATAAGGTACCATTGGTAGAACAGCATTTACGAAAGGAGTTTAGTCC  
ATTCCTGAAGCGCTGGTATCACATTATTGGTTTAAGTGGTGATTCTCAGCTGAAAATCTCAT  
TTCCTGAAGTTGTCAGAAGAAATGATGTCATCATCTGTACAGCACAGATCCTTGAGAATTCA  
CTGCTAAATGCAGACAAAGAAGATGAAGAAGGTGTCCACTTATCAGATTTTTCACTCATCAT  
TATTGATGAGTGTATCACACTCAAAAGGAAGGTGTCTACAACAACATAATGCGACGTTACT  
TAAAAGAAAAGAAGAAGAACAGGAAGCTGGCAAAAGAAAACAAACCACTGATCCCGCAGC  
CTCAGATTCTGGGACTTACAGCCTCACCTGGTGTAGGAGGTGCAACATCCTATTCCAAAGC  
TGAAGAACATATTCTGAAAATCTGTGCTAATCTTGATGCATGTAGAATCATGACTGTTGAGG  
AGCATGCCTCCCAGCTGAAGAATCAGGTGAAGGAACCTTTTAAAGAAGACTGTGATTGCAGA  
TGACAAAAAAAAGGATCCATTTAGAGAGAGAGTAAGTGAAGATCATGACAGAGATTCAAAAC  
TATTGCCAGCTTCATCCAAAATCTGAGTTTGGAACTCAGCCATATGAGCAGTGGGTGATTA  
GAGAAGAGAAAAAGCTGCAAAAGAAGAAAAACGCAAGGAACGTGTCTGTGCAGAACACC  
TGAAGAAATACAATGATGCTCTCCAGATAAATGATACCATCCGAATGGTAGATGCGTACAAT

CACCTGAATAACTTTTATAAGGATGAGAAAAGTAAGAAGACAGAAAGGAGTGATGATGACG  
ATGCACCAGCAGTATCAAAACAGGATGAAACAGATTTATTTCTAATAGGTTTATTTTCATGCA  
AAAAAGAAACAGCTGAAAGAGTTGGCTAGAATGCCAGAATATGAAAATGAAAAGCTAACAC  
AGTTGCGAAACACTTTAATGGAGGAGTTCACGAAGACTGAGGCACCTAGAGGAATTATTTT  
CACAAAGACCCGGCTAAGTGCTTTTGCTCTATTCCAGTGGATTAAGGATAACCCAAAATTTG  
AAGAAGTGGGAATTAAGGCCATTATCTTATTGGTTCTGGACATAACAGTGAAATGAAACC  
CATGACTCAGAATGAGCAGCGGGAAGTTATTGATAAATTCCGAGGTGGAAATTTGAATTTA  
CTTATTGCTACTACTGTAGCTGAGGAAGGCCTAGACATCAAAGAGTGTAACATTGTTATTGCG  
CTATGGCCTCGTCACCAATGAAATTGCTATGGTGCAGGCTCGTGGTCGAGCTCGAGCTGA  
TGACAGCACCTATGCACTTGTGGCTTCGAGTGGCTCAGGAGCTGTTGAACGTGAAGATGTT  
AATATTTTCCGTGAGAATATGATGTATAAAGCCATTACAGCATGTCCAGAAGATGCCACAGGA  
GGAGTATTTAAAGAAGATTCAGAATTACAGTGTCAAAGTATAGTGGAAGAAAGAAATGAAG  
GCAAAGAGACATCAGCACAAAGACATACAAGAAAAATCCTTCACTAATATCATTCTATGCAA  
AAATTGCCACAAGCTGGTATGTTCTGGGGAAGACATACGAGTTATTGAAAACATGCATCAT  
GTCAGTGTGAAAAGAGATTTCCAAAGTCTTTACCATACAAGAGAAAATAAGACGCTGCAAG  
ATAAGAATGCTGATTACCAGACAAATGGAGAAGTTATATGTAAAGATTGTGGACAAGCTTG  
GGGAAATATGATGGTTCACCGAGGTCTTGATCTGCCTTGCTAAAGATTATAAATTTTGTGA  
TTGTGTTTGAAGACAAGAAAACAATAAAAGAAATTTTAAAGAAATGGAGAGAGCTGCCCATC  
GAGTTCCTGGTTTTGATTATGCAGCTCATTGTCCTTCAAGTGATGAAGAT

>psittacula\_krameri-psittaciformes-mda5

ATGGCAGCGGAGTTGCTAGATGAGCGGTTCTCTACATGATCTCGTGCTTCAGGCCTCGG  
CTGAAGCAGTTCATTGCGGTGCAGCCGGTGCTGGACCGGCTCCCTTCGCTCAGCGCGGA  
GGACAGGGAGAAGGTGCGGGCGGTGCGCTGCAGCGAGGCGAGGTGGAAGGGGCGGA  
GGAGCTGCTGCGGGCCGTGGAGCGGGGACCCCGCGGGTGTGGCTGGTTCCACGAGTTC  
TTGCAGGCGCTCGAGCAGGGCGGTGCGGCATGGCCGCCTGCTACGTGAACCCAGCCT  
CAGCCAGCTGCCCTCGCCGGCCGAGGAGGCCGACCACGACCTCTGCGTTCAATTGGTGC  
AGCTGCTCCACAGCACGCTTGTGGATAGTATGCGGACCGTGCAGGTGGCCGAGAAGTGC  
CTGCAGATGGGCATCTTCCAGGATGAGGATCTGGATGGGATCCATACTGTTACTGACTGC  
CGTGGTAACAGAGAAGGTGCAAGGGAGCTATTGAGCAGATTAGTGCAGAAGAAAGATTGG  
TTCTCTCGTTTTTTGATTGCTCTGCGTGAAACCCAACATGGAGGCCTTGCAAGATGATTTAA  
GTGGAAATATAGGAGGAACAAAGGATAAACAATGAGATGAAGAACAGTACAAACGAAGA  
AACAGAAGTTACAAGCCAACCAGATTATGCCATAGTGGAGGATTTGAAGCAGCAGGAAAAT  
ATGAATGATAGTTTCAGCAGTGAGAACAATTTATTGGAAACATCTGTTGGAAAGAATTCTGT  
AGTTTCAGAGTCAGATGTCTCTATGGGAGTTGGAAGTGTCAGTAACTTGAATGAAAACCTG  
GGACAGAGCTGCACAAGCAGTGATTACAGATGAAGAAGAG-----

AGCAGAGCTTCACCTGAGCCAGATCTGGTCCTGAGAGATTACCAGATGGAAGTTGCAAAG  
CCAGCACTGAATGGGGAGAATATTATAATATGTCTCCCTACAGGCAGTGGTAAAACCAGAG  
TGGCTGTTTACATTACCAAAGATCATTTGGATAAAAAGAAAAGAGCATCAGAGCCTGGAAAA  
GTTATAGTCCTTGTTAATAAGGTACCATTTGGTAGAACAGCATTTACGAAAGGAGTTTAGTCC  
ATTCTGAAGCGCTGGTATCACATTATTGGTTTAAAGTGGTGATTCTCAGCTGAAAATCTCAT  
TTTCTGAAGTTGTCAGAAGAAATGATGTCATCATCTGTACAGCACAGATCCTTGAGAATTCA  
CTGCTAAATGCAGACAAAGAAGATGAAGAAGGTGTCCACTTATCAGATTTTTCACTTATCAT  
TATTGATGAGTGTATCACACTCAAAGGAAGGTGTCTACAACAACATAATGCGACGTTACT  
TAAAAGAAAAAAGAAGAACAGGAAGCTGGCAAAGAAAACAAACCACTGATCCCACAGCC

TCAGATTCTGGGACTTACAGCCTCACCTGGTGTAGGAGGTGCAACATCCTATTCCAAAGCT  
GAAGAACATATTCTGAAAATCTGTGCCAATCTTGATGCATGTAGAATCATGACTGCTGAAGA  
GCATGCCTCCCAGCTGAAGAATCAGGTGAAGGAACCTTTTAAGAAGACTGTGATTGCAGAT  
GACAAAAAAGGGATCCATTTAGAGAGAGAATAACTGAGATCATGACAGAGATTCAAACT  
ATTGCCAGCTTCATCCAAAATCTGAGTTTGGAACCTCAGCCATATGAACAGTGGGTGATCAG  
AGAAGAGAAAAAAGCTGCAAAAGAAGAAAAACGCAAGGAACGTGTCTGTGCAGAACACCT  
GAAGAAATACAATGATGCTCTCCAGATAAATGATACCATCCGAATGGTAGATGCATACAATC  
ACCTGAATAACTTTTATAAGGATGAGAAAAGTAAGAAGACAGTAAGGAGTGATGATGATGAT  
GCACCAGCAGTATCAAAACAGGATGAAACAGATTTATTTCTAATAGGTTTATTTTCATGCAAA  
AAAGAAACAGCTGAAAGAGTTGGCTAGAATGCCAGAATATGAAAATGAGAAGCTAACACAG  
TTGCGAAACACTTTAATGGAGGAGTTCACGAAGACTGAGACACCTAGAGGAATTATTTTCA  
CAAAGACCCGGCTAAGTGCCCTTTGCTCTATTCCAGTGGATTAAGGATAACCCAAAATTTGA  
AGAAGTGGGAATTAAGGCCATTATCTTATTGGTGCTGGACATAACAGTGAAATGAAACCC  
ATGACTCAGAATGAGCAACGGGAAGTTATTGATAAATTCCGAGGTGGAAATTTGAATTTACT  
TATTGCTACTACTGTAGCTGAGGAAGGCCTAGACATCAAAGAGTGTAACATTGTTATTCGCT  
ACGGCCTCGTCACCAATGAAATTGCTATGGTGCAAGGCTCGTGGTCGAGCTCGAGCTGATG  
AGAGCACCTATGCACTTGTGGCTTCGAGTGGCTCAGGGGCTGTTGAACGTGAAGATGTTA  
ATATTTTCCGTGAGAAAATGATGTATAAAGCCATTCAGCATGTCCAGAAGATGCCACAGGA  
GGAGTATTTAAAGAAGATTCAGAATTTCCAGTGTCAAAGTATAGTGGAAGAAAGAAATGAAGG  
CAAAGAGACATCAGCACAAAGACATACAAGAAAAATCCTTCACTGATAACATTCTTATGCAAA  
AATTGCCACAAGCTGGTATGTTCTGGGGAAGACATACGAGTTATTGAAAACATGCATCATG  
TCAGTGTGAAAAGAGATTTCCAAAGTCTTTACCATACGAGAGAAAATAAGACACTGCAAGAT  
AAAAATGCTGATTACCAGATAAATGGAGAAGTTATATGTAAAGATTGTGGACAAGCTTGGG  
GAAATATGATGGTTCACCGTGGTCTTGACCTGCCTTGTCTAAAGATTATAAATTTTGTGATT  
GTGTTTGAAGACAAGAAGACAAGAAAAGAAATTTTAAAGAAATGGAGAGAGCTGCCCATCA  
AGTTCCCTGGTTTTGATTACGCAGCTCATTGTCTTCAAGTGATGAAGAT

>lorius\_garrulus-psittaciformes-mda5

ATGGCAGGGGAGTTGCGAGATGAGCGTTTCCTCTACATGATCTCGTGCTTCAGGCCGCGG  
CTGAAGCAGTTCATCCGGGTGCAGCCGGTGCTGGACCGGCTCCCTTCGCTCAGTGTGGA  
GGACAGGGAGAAGGTGCGGGCGGCTGCGCGGCAGAGGGGCGAGGTGGAAGGGACGGA  
GGAGCTGCTGCGGGTCTGTGGAGCGGGGACCCCGCGGGTGTGGCTGGTTCCACGAGTTCT  
TGCAGGCGCTTGAGCACAGCGGCTGCGGCATGGCCGCCTGCTACGTGAACCCAGCCTC  
AGCCAGCTGCCGTCTCCGGCCGAGGAGGCTGACCACGACCTCTGCGTGCAATTGGTGCA  
GCTGCTTCACAGCACTCTCGTGGATAGTATGCGGACCGTGCAAGTGGCCGAGAAGTGCCT  
GCAGATGGGCATCTTCCAGGATGAGGACCTGGACGGGATCCATACTGTTACTGACAGTCG  
TGGAACAGAGAAGGTGCAAGGGAGCTATTGAGCAGATTAGTGCAGAAGAAAGATTGGTT  
CTCTCGTTTTTTGATTGCTCTGCGTGAAACCCAGCATGGAGGCCTTGCAGATGATTTAAGT  
GGAAATATAGGAGGAACAAAGGATAAACAATGGGATGAAGAAAAGTGTAATGAAGAAA  
CGGAAGTTACAAGCCAACCAGATTATGCCATAGTGGAGGACTTGAAGCAGCAGGAAAATAT  
GAATGATAGTTTCAGCAGTGAGAACAATTTATTGGAAACATCTATTGGAAAGAATTCTGTAG  
TTTCAGAGTCAGATGTCTCTACAGGAGTTGGAAGTGTCAAGTAACCTGAATGAAACCCTGAG  
ACAGAGCTGCACAAGCAGTGATTGAGATGAAGAGGAG-----  
AGCAGAGCTTCACCTGAGCCAGATCTGGTCCTGAGAGATTACCAGATGGAAGTTGCAAAG  
CCAGCACTGAATGGGGAGAATATTATAATATGTCTCCCTACAGGCAGTGGTAAAACCAGAG

TGGCTGTTTACATTACCAAAGATCATTTGGATAAAAAAGAAAAGAGCATCAGAGCCTGGAAAA  
GTTATAGTCCTTGTTAATAAGGTGCCATTGGTAGAACAGCATTTACGAAAGGAGTTTAGTCC  
ATTCCTGAAGCGCTGGTATCACATTATTGGTTTAAAGTGGTGATTCTCAGCTGAAAATCTCAT  
TTCCTGAAGTTGTCAGAAGAAATGATGTCATCATCTGTACAGCACAGATCCTTGAGAATTCA  
CTGCTAAATGCAGACAAAGAAGATGAAGAAGGTGTCCACTTATCAGATTTTTCACTCATCAT  
TATTGATGAGTGTCATCACTCAAAGGAAGGTGTCTACAACAACATAATGCGACGTTACT  
TAAAAGAAAAAAGAAGAACAGGAAATTGGCAAAAGAAAACAAACCACTGATACCACAGCC  
TCAGATTCTGGGACTTACAGCCTCACCTGGTGTAGGAGGTGCAACATCCTATTCCAAAGCT  
GAAGAACATATTCTGAAAATCTGTGCCAATCTTGATGCATGTAGAATCATGACTGTTGAGGA  
GCATGCCTCCCACTGAAGAATCAGGTGAAGGAACCTTTTAAGAAGACTGTGATTGCAGAT  
GACAAAAAAGGGATCCATTTAGAGAGAGAATAACTGAGATCATGACAGAGATTCAAACT  
ATTGCCAGCTTCATCCAAAATCTGAGTTTGGAACCTCAGCCATATGAACAGTGGGTGATCAG  
AGAAGAGAAAAAAGCTGCAAAAGAAGAAAAACGCAAGGAACGTGTCTGTGCAGAACACCT  
GAAGAAATATAATGATGCTCTCCAGATAAATGATACCATCCGAATGGTAGATGCATACAATC  
ACCTGAATAACTTTTATAAGGATGAGAAAAGTAAGAAGACAGTAAGGAGTGATGATGATGAT  
GCACCAGCAGTATCAAACAGGATGAAACAGATTTATTTCTAATAAGTTTATTTACGCAAA  
AAAGAAACAGCTGAAGGAGTTGGCTAGAATGCCAGAATATGAAAATGAGAAGCTAACACAG  
TTGCGAAACACTTTAATGGAGGAGTTCACGAAGACTGAGGCACCTAGAGGAATTATTTTCA  
CAAAGACCCGGCTAAGTGCCTTTGCTCTATTCCAGTGGATTAAGGATAACCCAAAATTTGA  
AGAAGTGGGAATTAAGGCCATTATCTTATTGGTGCTGGACATAACAGTGAAATGAAACCC  
ATGACTCAGAATGAGCAACGGGAAGTTATTGATAAATTCCGAGGTGGAAATTTGAATTTACT  
TGTTGCTACTACTGTAGCTGAGGAAGGCCTAGACATCAAAGAGTGTAAACATTGTTATTCGG  
TACGGCCTCGTCACCAATGAAATTGCTATGGTGCAGGCTCGTGGTCGAGCTCGAGCTGAT  
GAGAGCACCTATGCACTTGTGCTTCGAGTGGCTCAGGAGCTGTTGAACGTGAAGATGTT  
AATATTTTCCGTGAGAAAATGATGTATAAAGCCATTGAGAATGTCCAAAAGATGCCACAGGA  
AGAGTATTTAAGAAGATTGAGAATTTCCAGTGTCAAAGTATAGTGAAAAAGAAATGAAGG  
CAAAGAGACATCAGCACAAGACATACAAGAAAAATCCTTCACTAATAACATTCCTATGCAAA  
AATTGCCACAAGCTGGTATGTTCTGGGGAAGACATACGAGTTATTGAAAACATGCATCATG  
TCAGTGTGAAAAGAGATTTCCAAAGTCTTTACCATACAAGAGAAAATAAGACACTGCAAGAT  
AAGAATGCTGATTACCAGACAAATGGAGAAGTTATATGTAAAGATTGTGGACAAGCTTGGG  
GAAATATGATGGTTCACCGAGGTCTTGACCTGCCTTGTCTAAAGATTATAAATTTTGTGATT  
GTGTTTGAAGACAAGAAGACAAGAAAAGAAATTTTTAAGAAATGGAGCGAGCTGCCCATCA  
AGTTCCCTGGTTTTGATTATGCAGCTCATTGTCCTTCAAGTGATGAAGAT

>melopsittacus\_undulatus-psittaciformes-mda5

ATGGCAGGGGAGTTGCGAGATGAGCGTTTCCTCTACATGATCTCGTGCTTCAGGCCGCGG  
CTGAAGCAGTTCATCCGGGTGCAGCCGGTGCTGGACCGGCTCCCTTCGCTCAGTGTGGA  
GGACAGGGAGAGGGTGCGGGCGGCTGCGCTGCACCGGGGCGAGGTGGAAGGGGCGGA  
GGAGCTGCTGCGGGCCGTGGAGCGGGGACCCCGCGGCTGTGGCTGGTTCCACGAGTTC  
TTGCAGGCGCTTGAGCACAGCGGCTGCGGCATGGCCGCCTGCTACGTGAACCCAGCCT  
CAGCCAGCTGCCCTCTCCGGCCGAGGAGGCCGACCACGACCTCTGCGTGCAATTGGTGC  
AGCTGCTTCACAGCACTCTCGTGGATAGTATGCGGACCGTGACAGGTGGCCGAGAAGTGCC  
TGCAGATGGGCATCTTCAGGATGAGGACCTGGACGGGATCCATACTGTTACTGACAGTC  
GTGGGAACAGAGAAGGTGCAAGGGAGCTATTGAGCAGATTAGTGAGAAGAAAGATTGGT  
TCTCTCGTTTTTTGATTGCTCTGCGTGAAACCCAGCATGGAGGCCTTGACAGATGATTTAAGT

GGTAATATAGGAGGAACAAAGGATAAACAAAATGGAATGAAGAAAAGTACAAATGAAGAAA  
CAGAAGTTACAAGCCAACCATGTTATGCCATAGTGGAGGACTTGAAGCAGCAGGAAAATAT  
GAATGATAGTTTTAGCAGTGAGAACAATTTATTGGAAACATCTATTGGAAAGAATTCTGTAC  
TTTCAGAGTCAGATGTCTCTACAGGAGTTGGAAGTGTCCGTAACCTTGAATGAAAACCTGAG  
ACAGAGCTGCACAAGCAGTGATTACAGACGAAGAGGAG-----

AGCAGAGCTTCACCTGAGCCAGATTTGGTCCTGAGAGATTACCAGATGGAAGTTGCAAAG  
CCAGCACTGAATGGGGAGAATATTATAATATGTCTCCCTACAGGCAGTGGTAAAACCAGAG  
TGGCTGTTTACATTACCAAAGATCATTTGGATAAAAAGAAAAGAGCATCAGAGCCTGGAAAA  
GTTATAGTCCTTGTTAATAAGGTACCATTGGTAGAACAGCATTTACGAAAGGAGTTTAGTCC  
ATTCCTGAAGCGCTGGTATCACGTTATTGGTTTAAAGTGGTGATTCTCAGCTGAAAATCTCAT  
TTCCTGAAGTTGTCAGAAGAAATGATGTCATCATCTGTACAGCACAGATCCTTGAGAATTCA  
CTGCTAAATGCAGACAAAGAAGATGAAGAAGGTGTCCACTTATCAGATTTTTCACTCATCAT  
TATTGATGAGTGTATCACACTCAAAAGGAAGGTGTCTACAACAACATAATGCGACGTTACT  
TAAAAGAAAAAAGAAGAAGACAGGAAATTGGCAAAAGGAAACAAACCACTGATACCACAGCC  
TCAGATTCTGGGACTTACAGCCTCACCTGGTGTAGGAGGTGCAACATCCTATTCCAAAGCT  
GAAGAACATATTCTGAAAATCTGTGCCAATCTTGATGCATGCAGAATCATGACTGTTGAGGA  
ACATGCCTCCCAACTGGAGAATCAGGTGAAGGAACCTTTTAAGAAGACTGTGATTGCAGAT  
GACAAAAAAGGGATCCATTTAGAGAGAGGATAACTGAGATCATGACAGAGATTCAAACT  
ATTGCCAGCTTCATCCAAATCTGAGTTTGGAACTCAGCCATATGAACAGTGGGTGATCAG  
AGAAGAGAAAAAAGCTGCAAAAGAAGAAAAACGCAAGGAACGTGTCTGCGCAGAACACCT  
GAAGAAATATAATGATGCTCTCCAGATAAATGATACCATCCGAATGGTAGATGCATACAATC  
ACCTGAATAACTTTTATAAGGATGAGAAAAGTAAGAAGACAGTAAGGAGTGATGATGATGAT  
GCACCAGCAGTATCAAAACAGGATGAAACAGATTTATTTCTAATAAATTTATTTTCATGCAAAA  
AAGAAACAGCTGAAGGAGTTGGCTAGAATGCCAGAATATGAAAATGAGAAGCTAACACAGT  
TGCGAAACACTTTAATGGAGGAGTTCACGAAGACTGAGGCACCTAGAGGAATTATTTTCAC  
AAAGACCCGGCTAAGTGCCTTTGCTCTATTCCAGTGGATTAAGGATAACCCAAAATTTGAA  
GAAGTGGGAATTAAGGCCATTATCTTATTGGTGCTGGACATAACAGTGAAATGAAACCCA  
TGACTCAGAATGAGCAACGGGAAGTTATTGATAAATTCGAGGTGGAAATTTGAATTTACTT  
GTTGCTACTACTGTAGCTGAGGAAGGACTAGACATCAAAGAGTGTAACATTGTTATTCGGT  
ATGGCCTTGTCACCAATGAAATTGCTATGGTGACGGCTCGTGGTCGAGCTCGAGCTGATG  
ACAGCACCTATGCACTTGTGCTTCAAGTGGCTCAGGAGCTGTTGAACGTGAAGATGTTAA  
TATTTTCCGTGAGAAAATGATGTATAAAGCCATTGAGAATGTCCAAAAGATGCCACAGGAAG  
AGTATTTAAAGAAGATTCAGAATTTCCAATTGCAAAGTATAGTGGAAAAAGAAATGAAGGCA  
AAGAGACATCAGCACAAAGACACTCAAGAAAAATCCTTCGCTAATAACATTCTATGCAAAAA  
TTGCCACAAGCTGGTATGTTCTGGGGAAGACATACGAGTTATTGAAAACATGCATCATGTC  
AGTGTGAAAAGAGATTTCCAAAGTCTTTACCATACAAGAGAAAATAAGACACTGCAAGATAA  
GAATGCTGATTACCAGGCAAATGGAGAAGTTATATGTAAAGATTGTGGACAAGCTTGGGGA  
AATATGATGGTTCACCGAGGTCTTGACCTGCCTTGTCTAAAGATTATAAATTTTGTGATTGT  
GTTTGAAGACAAGAAGACAAGAAAGGAAATTTTTAAGAAATGGAGCGAGCTGCCCATCGAG  
TTCCCTGGTTTTGATTATGCAGATCATTGTCTTCAAGTGATGAAGAC

>cuculus\_canorus-cuculiformes-mda5

ATGGCGGAGCAGKGCCGGGACGAGCGCTTCCTCTACATGATCTCGTGCTTCAGGCCGCG  
GCTGAAGCAGTTCATCCGCGTGCAGCCGGTGCTGGMCCGCCTGCCGTCGCTGGGCGCG  
GAGGAGCGGGAGCGGGTGCGGGCGGCCGCCCTGCAGCGCGGCGAGGTGGCGGGCGCG

GAGGAGCTGCTGCGGGCGGTGGAGCGCGGCCCCCGCGGCTGCGGCTGGTTCCACGAGT  
TCCTCCAGGCGCTGGAGCACGGCGGCKGCAGCCYGGCCGCCMGCTACGTGAACCCAG  
CCTCAGCCACCTGCCCTCGCCCGCCGAGGAGGCCGACCACGACCTCTGCGTGACCTGG  
TGCAGCTGCTCCACAGCACGCTGGTGGATAGAATGCGGGCSGTGCCGGTGGCCGAGAAG  
TGCCTGGAGTTGGGCGTCTTGACAGGACGAAGACCTGGATCGGATCCACACTGTTACTGAC  
AGTCGTGGGAACAGAGATGGTGAAGGGAGCTATTGAGCAGAATAGTGCAGAAGAAAGGT  
TGGTTTTCTCCTTTTTTATTGCTCTGCGTGAAACCCAACATGGAGACCTTGACAGATGATTT  
AAGCGGAAATACAGGAGGAACAGAGAACAGACAAAATGGGATGAAGAAGAGTACAAACAA  
AGAAACAGAAGTTACCAGCCCACCAGGATATCCCCTAGTAGAGGATTTGGAACATCAAGAA  
AATGTGCATGATAGTTTCAGCAGTGAGAAGAGTGTATTGGAAACATCCATTAGAAAGAATTC  
TGATAGATTACAGGCTCTGATGTCTCCATAGGAGATGGAAGTGTCACTAACTTAAACGAAAAC  
CTGGGACAGAGCTGCACAACCTAGCGATTGAGATGAAGATGAAGTGGAGACCAGAGCTTCA  
CCTGAGCCGGCCTTGATTCTGAGAGATTACCAGATGGAAGTTGCAAAGCCAGCACTGAAT  
GGGGAGAACGTTATAATCTGTCTCCCTACAGGCAGTGGTAAAACCAGAGTGGCTGTTTACA  
TTACCAAAGATCACTTGGATAAGAAGAAAAGAGCATCAAAGCCTGAAAAGTTATAGTACTT  
GTTAATAAGGTACCATTGGTAGAACAGCATTTACGAAAGGAGTTTAATCCATTCTGAAGCG  
TTGGTATGAGGTTACTGGTTTGAGTGGTGATTCTCAGCTGAAAATCTCATTTCTGAAGTTG  
TCAGAAGAAATGATGTCATCATCAGCACAGCACAGATCCTGGAGAATTCAGTGTTAAACGC  
AGCTAAAGAAGATGAAGAAGGTGTCCACTTATCAGATTTTTCACTTATCATTATCGATGAGT  
GTCATCACACTCAAAGGAAGGCGTCTACAATAACATAATGCGACGTTACTTAAAAGAAAA  
GATGAAGAACAGGAAGCTGGCAAAGAAAACAAACCACTGACTCCACAGCCTCAGATTCTT  
GGACTTACAGCCTCACCTGGTGTAGGAGGTGCAACAACCAACTCAAAGCTGTAGAACATA  
TTTTGAAAATCTGTGCCAATCTTGATGCATGTAGAATCATGACTGTTGAAGAGCATGCCTCC  
CAGCTGAAGAATCAGGTGAAGGAACCGTATAAGAAGACTGTTATTGCAGATGACAAAAGAA  
GGGATCCATTTAGAGAGAGAATTACAGAGATCATGGCAGACATTCAAACCTATTGTCAGCT  
CCATCCAAAATCTGAGTTTGGAACCTAGCCATATGAACAGTGGGTGATTAGAGAAGAGAGA  
AGAGCTGCAAAAGAAGAAAAACGCAAGGAACGTGTCTGCGCAGAACACCTGAAGAAATAT  
AATGATGCTCTCCAAATAAATGACACCATCCGAATGGTGGATGCATACAATCATCTAAATAA  
CTTCTATAAGGAGGAGAAAAAGTAAGAAGACAGTAAGGAGTGATGATGATGATAAACAGCA  
GTATCAAAACAGGATGAAACAGATGAATTTCTAATAGGTTTATTTTCATGCAAAAAAGAAACA  
GCTGAAAGAGTTGACTAAAAAGCCAGAATATGAAAATGAGAAGCTAATACAGTTGCGAAAC  
ACTTTAATGGAAGAGTTCACGAAGACTGAGGAACCCAGAGGAATTATTTTCACAAAGACTC  
GGCTAAGTGCCTTTGCTCTGTTCCAGTGGATTAAGGATAACCCAAAATTTGAAGAAGTGGG  
AATTAAGGCCCATATCTTATTGGTGCTGGACATAACAGTGAAGTTAAGCCCATGACTCAGA  
ATGCGCAAAGGGAAGTTATTGATAAATTCCGAGGTGGAAATGTAAATTTACTTATTGCGACT  
CCTGTAGCTGAGGAAGGCCTAGACATCAAAGAGTGTAACATCGTTATTTGCTATGGCCACG  
TCACCAATGAAATTGCTATGGTGCAGGCTCGTGGTCGAGCTCGAGCTGATGAGAGCACCT  
ATGCACTTGTGGCTTCAAGAAGCTCAGGAGCTGTTGAACGTGATGATGTTAATACTTTCCG  
TGAGAAAATGATGTATAAGGCCATTCAGCATGTCCAGAAGATGCCACAAGAAGAGTATTTA  
CATAAGATTCAGAAATTTCCAGTTGCAAAGTATAGTGGAAAAAAAATGAAGGTAAAGAGAGA  
TCAGCGCAAGACATACAAGAAAAATCCTTCACTAATAACATTCTTATGCAAAAATTGCCACA  
AGCCAGTATGTTCTGGAGAAGACATACAAGTTATTGAGAACATGCATCATATCACTGTGAAA  
AAAGATTTCCAAAGTCTTTACCATACAAGAGAAAATAAGACACTGCAAGAGAACCATGCTGA  
TTACCAGACAAATGGGGAAATTAAGTGTAAAGATTGTGGACAAGCTTGGGGGAATATGATG

GTTACACCGAGGTCTTGACCTGCCTTGCCTAAAGATTAAAAATTTTGTGGTTGTGTTTGAAGG  
CAAGGAAACAACAAAGGACATTTTAAAGAAATGGGGAGAACTGTCTGTCAGGTTCCCTGAT  
TTTAATTATGCAGCTCATTGTCCTTCAAGTGATGAAGAT

>tauraco\_erythrolophus-musophagiformes-mda5

ATGGCCGAGGCGGCCCGAGACGAGCGCTTCCTCTACATGATCTCCTGCTTCAGGCCGCG  
GCTGAAGCAGTTCATCCGGGTGCAGCCGGTGCTGGACCTGCTTCCCTCGCTGAGCGCGG  
AGGAGAGGGAGAAGGTGCGGGCGGCCGCCCTGCAGCGGGGCGAGGTGGCGGGGGCGG  
AGGAGCTGCTGCGGGCCGTGGAGCGGGGCCCCCGCGGGTGCGGCTGGTTCCACGAGTT  
CCTGCAGGCGCTGGAGCACGGCGGCTGCAGCCTGGCCGCCTGCTACGTGAACCCAGCC  
TCAGCCAGCTGCCCTCGCCGGCCGAGGAGGCTGACAACGACCTTTGCGTGCACTTGGTG  
CAGCTGCTCCACAGCACGCTGGTGATAGGATGCAGACCATGCAGGTTGCCGAGAAGTGT  
CTGCAGATGGGCATCTTCCAGGAGGAGGACCTGGATCGGATCCCACTGTTACTGACAAC  
CGTGGCAACAGAGATGGTGGAAGGGAGCTATTAAGCAGAATAGTGCAAAAGAAAGATTGG  
TTCTCTCCTTTTCTGGTTGCTCTTCGTGAACTCAGCATGGAGGCCTTGCAGATGATTTAAG  
CGGAAACACAGGAGGAACAGAGAATAGACAAAATGGAATGAAGAACAGTACAAATGAAGA  
AACAGAAGTTACAAGCCAACAAGGATATGCCATAGTGAGGATGTGAAACCACATGAAAT  
GTGAATGATAATTTCAGTAGTGAGAACAGTGTATTGGAAACATCTATGGGAAAGAATTCTGT  
AGTTTCAGAGTCAGATGTCTCCATAGGAGATGGAAGTGTGAGTAACTTCAGTGAAATCCTG  
GGACAGAGCTGCACAACCAGTGATTCCGATGAAGATGAAGTGGAGAGCAGAGCTTCACCT  
GAGCCAGATCTGATCCTGAGAGATTACCAGATGGAAGTTGCAAAGCCAGCACTGAATGGG  
GAGAATATTATAATATGTCTCCCTACAGGCAGTGGTAAAACCAGAGTGGCTGTTTACATTAC  
CAAAGATCACTTGGATAAGAAGAAAAGAGCATCAGAGCCTGGAAAAGTTATAGTACTTGTT  
AATAAGGTACCATTGGTAGAACAGCATTTAAGAAAGGAGTTTAATCCATTCCCTGAAGCGTTG  
GTATCAGGTTATTGGTTTAAGTGGTGATTCTCAATTGAAAATCTCATTTCCCTGAAGTTGTCA  
GAAGAAACGATGTCATCATCAGTACAGCACAGATCCTTGAGAATTCAGTGTTAAATGCAGC  
CAAAGAAGATGAAGAAGGTGTCCACTTATCAGATTTTTCTACTCATCATTATTGATGAGTGTC  
ATCACACTCAAAGGAAGGTGTCTACAACAATATAATGCGACGTTATTTAAAAGAAAAGAAG  
AAGAATGAAAAGCTAGCAAAAGAAAACAAACCACTGATCCCACAGCCTCAGATTCTGGGAC  
TTACAGCTTCACCTGGTGTAGGAGGTGCAAAAACCAACTCAAAGCAGAACAACATATTCT  
GAAAATCTGTGCCAATCTTGATGCGCGTCGAATCATGACTGTTCAAGAGCATGCCTCCCAA  
CTAAAGAATCAGGTGAAGGAACCATATAAGAAGACCGTGATTGCAGATGACAAAAGAAGGG  
ATCCATTTAGAGAGAGAATTACTGAGATCATGACAGATATTCAAACTATTGCCAGCTCCAT  
CCAAAATCTGAACTTGGAACCTCAGCCATATGAACAGTGGGTGATTAGAGAAGAGAGAAAAG  
CTGCAAAAGAAGAAAAACGTAAGGAACGTGTCTGTGCAGAACACTTGAAGAAATACAATGA  
TGCTCTCCAGATAAATGACACCATCCGAATGGTAGATGCATACAATCACTTAAATAGCTTCT  
ATAAGGAGGAGAAAAAGAAAGAACAGTAAGGAGTGATGATGACGATGAACCAGCGGTAT  
CAAAACAGGATGAAACAGATGAATTTCTAATAGGTTTATTTTCATGCGAAAAAGAAACAACCTG  
AAAGAGTTGGCTAGAAAGCCAGAATATGAAAACGAGAAGCTAATACAGTTGCGAAACACTT  
TAATGGAGGAGTTACGAAGACCGAGGAACCTAGAGGAATTATTTTACAAAGACTCGGCT  
AAGTGCCTTTGCTCTATTCCAGTGGATTAAGGATAACCCAAAATTTGAAGAAGTGGGAATTA  
AGGCCCATTTATCTTATTGGTGCTGGACATAACAGTGAACTAAACCCATGACTCAGAATGA  
GCAAAGGGAAGTCATTGATAAATTCGAGGTGGAAGTGTAATTTACTTATTGCTACTACTG  
TAGCTGAGGAAGGCCTAGACATCAAAGAGTGTAACATCGTCATTGCTATGGCCTCGTCAC  
CAATGAAATTGCTATGATGCAGGCTCGTGGTCGAGCTCGAGCTGATGAGAGCACCTATACA



GTTGTGGCTTCGAGTGGCTCAGGAGCTGTTGAACGTGAAGATGTGAATGTCTTCCGAGAG  
AACATGATGTATAAGGCCATTTCAGCGTGTCCAGAACATGCCACAGGAAGAGTATTTAAATA  
AGATTCAGAATTTCCAGTTGCAAAGTATACTGGAAAAACAAATGAAGGCAAAGAGAGATCA  
GCGCAAGACATACAAGAAAAATCCTTCACTTATAACATTCCTATGCAAAAATTGCCACAAGC  
TGATATGTTCTGGAGAAGATATTCAAGTTATTGAAAATATGCATCACGTCAGCGTGAAAAAA  
GATTTCCAAAGTCTCTACCACACAAGAGAAAATAAGACACTGCAAGATAAGGACGCCGATT  
ACCAGACAAATGGGGAAATTATATGTAAAGATTGTGGACAAGCTTGGGGAAATATGATGGT  
TCACCGAGGTCTTGACCTGCCTTGTCTAAAGATTTCGAAATTTTGTAGTTGTGTTTGAAGACA  
AGAAAACAACAAAGCAAATTTTTAAGAAATGGGGAGAACTGCCAGTCAGGTTCCCTAGTTTT  
GATTATGCAGCTCATTGTCCTTCAAGTGATGAAGAT

>antrostomus\_carolinensis-caprimulgifformes-mda5

ATGGCAGAGGAGTCCCGAGACGAGCGCTTCCTCTACATGATCTCCTGCTTCAGGCCGCGG  
CTGAAGCAGTTCATCCGGGTGCAGCCGGTGCTGGACCTGCTCCCCTCGCTGAGCGCAGG  
AGAGAGGGAGAGRGTGCGGGCGGSCGCCCTGCMGCGGGGAGAGGTGGAGGGGGCGGA  
GGAGCTGCTGCGGGCCGTGGAGCGGGGACCCCGCGGGTGCGGTTTCTTCCATGAGTTCC  
TGCACGCCCTGGAGCACGGGGGCTGCAGCCTGGCCGCCTGCTACGTGAACCCCAGCCTC  
AGCCAGCTGCCCTCGCCAGCCCAGGAGGCTGACCACGACCTCTGCGTGCACCTGGTGCA  
GCTGCTTCACGGCACACTGGTGGACAGAATGCAGACCATGCAGGTGGCCGAGAAGTGCC  
TGCAGATGGGCATCTTCCAGGAGGAGGACCTGGATCGGATCCGCACTGTTACTGACAATC  
GTGGGAACAGAGATGGTGCAAGGGAGCTATTGAGCAGAATAGTGCAGAAGAAAGATTGGT  
TCTCTCCTTTTTTATTGCGTTGCGTGAAACTGAACATGGAGGCCTTGCAGATGATTTAAGT  
GGAAATACAGGAGGAACAGAAAAAGAGACAAAATGGGATGAAGAACAGTACAAATGAAGAA  
ACAGAAGCTACAGGCCAAGCAGGATATGCCGTAGTGGAGGATTTGAAACAGCAAGAAAAT  
GTGAATGATAGTTTTCAGCAGTGAGAACAGCATACTGGAAACATCTATTGAAAGAGTTCTG  
TAGTTTTAGAGTCAGATGTCTCCATAGGAGATGGAAGTGTCAATAACTTGAATGAAGACCTA  
GGACAGAGCTGCACAACCAGTAATTCAGATGAAGATGAAGTGGAAGCAGAGCTTCACCT  
GAGCCAGATCTAATCCTGAGAGATTACCAGATGGAAGTTGCAAAGCCAGCACTGAATGGG  
GAGAATATTATAATATGTCTCCCTACAGGCAGTGGTAAAACCAGAGTGGCTGTTTACATTAC  
CAAAGATCACTTGGATAAGAAGAAAAGAGCATCAGAGCCTGGAAAAGTCATAGTACTCGTT  
AATAAGGTACCATTGGTAGAACAGCATTTACGAAAGGAGTTTAATCCATTCTGAAGCGTTG  
GTATCAAGTTATTGGTTTAAGTGGTGATTCTCAGCTGAAAATCTCATTTCTGAAGTTGTCA  
GAAGAAATGATGTCATCATCAGTACAGCACAGATCCTTGAGAATTCAGTGTAAATGCAGCT  
GAAGAAGGTGAAGAAGGTGTTCTCTTATCAGATTTTTCACTCATCATTATTGATGAGTGTCA  
TCACACTCAAAGGAAGGTGTCTACAACAATATAATGCGACGTTACTTAAAAGAAAAGAAGA  
AGAACAAGAAGCTAGCAAAAAGAAAATAAACCACTGATCCCACAGCCTCAGATTCTGGGACT  
TACAGCCTCACCTGGTGTAGGAGGTGCAACATCCAACCTCAAAGCAGAAGAACATATTCTG  
AAAATCTGTGCCAATCTTGATGCACGTAGAATCATGACTGTTGAAGAGCATGCCCCCAGT  
TGAAGAATCAGGTGAAGGAACCATAACAAGAAGACTGTGATTGCAGATGACAAAAGAAGGG  
ATCCATTTAGAGAGAGAATTACTGAGATCATGACAGACATTCAAACCTATTGCCAGCTCCAC  
CCAAAATCTGAGTTTGGAACTCAGCCATATGAACAGTGGGTGATTAGAGAAGAGAGAAGAG  
CTGCAAAAAGAAGAAAAACGCAAGGAACGTGTCTGTGCAGAACACTTGAAGAAATACAATGA  
TGCTCTCCAGATAAATGATACTATCCGAATGGTGGATGCATACAATCACCTAAATAACTTCT  
ACAAGGAAGAGAAGAGTAAGAAGATCCGATGGAGTGATGATGATGATGAACCAGCAGTAT  
CAAACAGGATGAAACAGATGAATTTCTAATAGGTTTATTTTCATGCAAAGAAGAAACAGCTG

AAAGAGTTGGCTAGAAAGCCAGAATATGAAAACGAGAAGCTAATACAGTTGCGAAACACTT  
TAATGGAGGAATTCACGAAGACTGAGGAACCTAGAGGAATTATTTTCACAAAGACTCGGCT  
AAGTGCCTTTGCTCTGTTCCAGTGGATTAAGGATAACCCAAAATTTGAAGAAGTAGGAATTA  
AGGCCCATTTATCTTATTGGTGCTGGACATAACAGTGAAATTAACCTATGACTCAGAATGAG  
CAAAGGGAAGTAATTGATAAATCCGACGTGGAAGTGTAATTTACTTATTGCTACTACTGT  
AGCTGAGGAAGGCCTAGACATCAAAGAGTGTAACATCGTTATTCGCTACGGCCTCGTCACC  
AATGAAATTGCTATGGTGCAGGCTCGTGGCCGAGCTCGAGCTGATGAGAGCACCTATGCA  
CTTGTGGCTTCAAGTGGCTCAGGAGCTGTTGAACGTGAAGATGTTAATATTTTCCGTGAGA  
AAATGATGTATAAGGCAATTCAGCGTGTCAGAAGATGCCACAGGAAGAGTATTTAAATAA  
GATTCAGAATTTCCAGTTGCAAAGTATAGTGGA AAAACAAATGAAGACAAAGAGAGATCAG  
CGCAAGACATACAAGAAAAATCCTTCACTAATAACATTCTATGCAAAAATTGCCACAAGCT  
GATATGTTCTGGAGAAGACATACAAGTTATTGAAAACATGCATCATGTCAGTGTGAAAAAG  
ATTTCCAAAGTCTTTACCATACAAGAGAAAAATAAGACACTGCAAGATAAGCATGCCGATTAC  
CAGACAAATGGGGAAATTATATGTAAAGATTGTGGACAAGCTTGGGGAAACATGATGGTTC  
ACCGAGGTCTTGACCTGCCTTGTCTAAAGATTAGAAATTTTGTGGTTGTATTTGAAGACAAG  
AAAACAACAAAGCAAATTTTTAAGAAATGGGGTGAAGTGGCCGTCCAGTTCCTAGTTTTGA  
TTATGCAGCTCACTGTCCTTCAAGTGATGAAGAC

>columba\_livia-columbiformes-mds5

ATGGGAGAAGAGTCCCGAGACGAACGCTTCTCTACATGATCTCTCTGCTTCAGGCCGCGG  
CTGAAGCAGTTCATCCGGGTGGAGCCGGTGCTGGACCGGCTTCCCTTGCTGAGCGCGGA  
GGACAGGGAGAAGGTGCGGGCGGCCGCCCGGCAGCGGGGCGAGGTGGAGGGGGCGGA  
GGAGCTGCTGCGGGCCGTGGAGCGGGGACCCGCGGGTGCGGCTGGTTCCACGAGTTC  
CTGCAGGCGCTGGAGCACAGTGGCTGCAGCCTGGCTGCCTGCTACGTGAACCCAGCCT  
CAGCCAGCTGCCATCGCCAGCCGAGGAGGCCGACCATGACCTCTGCGTGCACTTGGTGC  
AGCTGCTCTACAGCACGCTGGTGGATAAAATGCAGACCGTGCAAGTGGCCGAGAAGTGCC  
TGCAGATGGGCATCTTCCAGGAGGAGGACCTCGATCAGATCCACACTGTTACTGACAATCA  
TGGGAACAGAGGTGGTGCAAGGGAAGTACTGAGCAGAGTAGTGCAAGAAGGATTGGTT  
CTCTCCTTTTTTGATTGCTCTACGTGAAACCCGACATGGAGACCTTGCAAGATGATCTAAGTG  
GAAATACAGGAGGAACAGAGAATGGACAAAATGAGATGAAGAACAGTACAAATGAAGTAAG  
AGAAGTTATAAGCCCACCAGGATATGCCATTGTGGAGGATTTGAAACAGCAAGAAAATGTG  
AATGATAGTTTTCAGCAGTGAGAACAGTGTACTGGAACATCTACTAGAAGGAATTCTGTAGT  
TTCTGAGTCAGATGTCTCCATAGGAGATGGAAGTGTGAGTAAGTTGAAAGAAAAGTTGGGA  
CACAGCTGCACAACCAGTGATTGAGATGAAGGTGAAATGGAAAGCAGATCTTACCTGAGC  
CAGATCTGATCCTGAGAGATTACCAGATGGAAGTTGCAAAGCCAGCACTGAATGGGGAGA  
ATATTATAATATGTCTCCCTACAGGCAGTGGTAAAACCAGAGTGGCTGTTTACATTACTAAA  
GATCACTTGGATAAGAAGAAAAGAGCATCGGAGCCTGGAAAAGTTATAGTACTTGTTAATA  
AGGTACCATTGGTAGAACAACATTTACGAAAGGAGTTTAAATCCATTCTGAAGCGTTGGTAT  
CGGGTTATTGGTTTAAGTGGCGATTCTCAGCTGAAAATCTCATTTCTGAAGTTGTCAGAAG  
AAATGATGTCATCATCAGTACAGCACAGATCCTTGAGAATTCAGTGTAGATGCAGCCAAG  
GAAGATGAAGAAGGTGTCCACTTATCAGATTTTTCACTCATCATTATTGATGAATGTCATCA  
CACTCAGAAGGAAGGTGTCTACAATAATATAATGCGACGTTACTTAAAAGAAAAGATGAAGA  
ACAGGAAGCTAGCAAAAGAAAACAAACCACTGATCCACAGCCTCAGATTCTGGGACTTAC  
AGCCTCACCTGGTGTAGGAGGTGCAACATCCAACCTCAAAGCTGAAGAACATATTCTGAAA  
ATCTGTGCCAATCTCGATGCGTGTAAGATCATGACTGTTGAAGAGCATGCCTCCCAATTGA

AGAATCAAGTGAAGGAACCATATAAGAAGACTGTGATTGCAGATGACAAAAGAAGGGATCC  
ATTTAGAGAGAGAATTACTGAGATCATGACTGATATTCAAACCTATTGCCAGCTTCATCCAA  
AATCTGAGTTTGGAACTCAGCCATATGAACAGTGGGTGATTAGAGAAGAGAAAAAAGCTGC  
AAAAGAAGAAAAACGCAAGGAACGTGTCTGTGCGGAACACCTGAAGAAATATAACGATGCT  
CTCCAGATAAATGACACCATCCGAATGGTGGATGCGTACAATCACCTAAAGAACTTTTATAA  
GGAGGAGAAAAGTAAGAAGACAGTAAGGAATGACGATGATGATGAACCAGCAGTATCAAA  
ACAGGATGAAACAGATGAATTTCTAATAGGTTTATTTTCATGCAAAAAAGAAGCAGCTGAAAG  
AGTTGGCTAGAAAGCCAGAATATGAAAATGAGAAGCTAATACAGTTGCGAAACACTTTAAT  
GGAGGAGTTTCAAAAGACCGAGGAACCTAGAGGAATTATTTTCACGAAGACTCGGCTCAG  
TGCCTTTGCTCTGTTCCAGTGGATTAAGGATAACCCAAAATTTGAAGAAGTGGGAATTAAG  
GCCCATTATCTTATTGGTGGTGGACATAACAGTGAAATGAAACCCATGACTCAGAATGAGC  
AAAGGGAAGTTATTGATAAATTCCGAGGTGGTAATGTAAATTTACTTATTGCTACTACTGTA  
GCTGAGGAAGGCCTAGACATCAAAGAATGTAACATCGTTATTCGCTATGGCCTCGTCACCA  
ATGAAATTGCCATGGTGCAGGCTCGTGGTCGAGCTCGTGCTGATGAGAGCACCTATGCAC  
TTGTGGCTTCAAGTGGCTCAGGAGCCGTTGAACGTGAAGATGTTAATATTTTCCGTGAGAA  
AATGATGTATAAGGCCATTCAACGTGTCCAGAAGATGCCGCGGGAAGAGTATTTAAATAAG  
ATTCAGGATTTCCAGTTGCAAAGTATAGTGGAATAAATGAAGACAAAGAGAGATCAGT  
GCAAGACATACAAGAAAAATCCTTCACTAATAACATTCTGTGCAAAAATTGCTACAAGCTG  
ATATGTTCTGGAGAAGACATACAAGTTATTGGAAACATGCATCATGTCAGTGTAATAAAGA  
TTTCCAAAGTCTTTACCATACAAGAGAAAATAAGACACTGCAAGATAAGCATGCTGATTACC  
AGACAAATGGGGAAATTATATGTAAAGACTGTGGACAAGCTTGGGGAAACATGATGGTTCA  
CAGAGGTCTTGACCTGCCTTGTCTAAAAATTAGAAATTTTGTGGTTGTGTTTGAAGACAAGA  
AAACAACAAAGCAAATTTTAAAGAAATGGGGAGAACTGCCATTAGGTTCCCTAATTTTGAT  
TATGCAGCTCATTGCCCTTCAAGTGATGAAGAT

>patagioenas\_fasciata-columbiformes-mds5

ATGGGAGAAGAGTCCCGAGACGAACGCTTCCTGTACATGATCTCCTGCTTCAGGCCGCGG  
CTGAAGCAGTTCATCCGGGTGGAGCCGGTGCTGGACCGGCTTCCTCGCTGAGCGCGGA  
GGACAGGGAGAAGGTGCGGGCGGCCCGCCCGTCAGCGGGGCGAGGTGGAGGGGGCGGA  
GGAGCTGCTGCGGGCCGTGGAGCGGGGACCCCGCGGGTGCGGCTGGTTCCACGAGTTC  
CTGCAGGCGCTGGAGCACAGTGGCTGCAGCCTGGCTGCCTGCTACGTGAACCCAGCCT  
CAGCCAGCTGCCATCGCCGGCCGAGGAGGCCGACCATGACCTCTGCGTGCACTTGGTGC  
AGCTGCTCCACAGCACGCTGGTGGATAGAATGCAGACCGTGCAGGTGGCCGAGAAGTGC  
CTGCAGATGGGCATCTTCCAAGAGGAGGACCTGGATCGGATCCACACTGTTACTGACAAT  
CATGGGAACAGAGATGGTGCAAGGGAGCTACTGAGCAGAATAGTGCAGAAGAAAGATTGG  
TTCTCTCCTTTTTTGATTGCTCTGCGTGAAACCCAACATGGAGACCTTGAGATGATCTAAG  
TGGAATAGAGGAGGAACAGAGAATGGACAGAATGGGATGAAGAACAGTGCAAATGAAGT  
AAGAGAAGTTATAAGCCAACCAGGATATGACATTGTGGAGGATTTGAAACAGCAAGAAAAT  
GTGAATGATAGTTTCAGCAGTGAGAACAGTGTACTGGAACATCTACTGGAAGGAATTCTG  
TAGTTTCTGAGTCAGATGTCTCCATAGGAGATGGAAGTGTGAGTAACCTGAAAGAAAAT  
GGGACACAGCTGCACAACCAGTGATTGAGATGAAGGTGAAATGGAGAGCAGATCTTACC  
TGAGCCAGATCTGATCCTGAGAGATTACCAGATGGAAGTTGCAAACAGCACTGAATGGA  
GAGAATATTATAATATGTCTCCCTACAGGCAGTGGTAAAACCAGAGTGGCTGTTTACATTAC  
CAAAGATCACTTGGATAAGAAGAAAAAAGCATCAGAGCCTGGAAAAGTTATAGTACTTGTTA  
ATAAGGTACCATTGGTAGAACAACATTTACGAAAGGAGTTTAAATCCATTCTGAAGCATTGG

TATCGGGTTATTGGTTTAAAGTGGTGATTCTCAGCTGAAAATCTCATTTCCTGAAGTTGTCAG  
AAGAAATGATGTCATCATCAGTACAGCACAGATCCTTGAGAATTCACTGTTAGATGCAGCC  
AAAGAAGATGAAGAAGGTGTCCACTTATCAGATTTTTCACTCATCATTATCGATGAATGTCA  
TCACACTCAGAAGGAAGGTGTCTACAATAATATAATGCGACGTTACTTAAAAGAAAAGATGA  
AGAACAGGAAGCTAGCAAAAAGAAAACAAACCACTGACCCACAGCCTCAGATTCTGGGAC  
TTACAGCCTCACCTGGTGTAGGAGGTGCAACGTCCAACCTCAAAGGCTGAAGAACATATTCT  
GAAAATCTGTGCTAATCTTGATGCATGTAGAATCATGACTGTTGAAGAGCATGCCTCCCAAT  
TGAAGAATCAAGTGAAGGAACCATATAAGAAGACTGTGATTGCAGATGACAAAAGAAGGGA  
TCCATTTAGAGAGAGAATTACTGAGATCATGACCGATATTCAAACTATTGCCAGCTCCATC  
CAAAATCTGAGTTTGGAACCTCAGCCATATGAACAGTGGGTGATTAGAGAAGAGAAAAAGC  
TGCAAAAAGAAGAAAAACGCAAGGAACGTGTCTGTGCAGAACACCTGAAGAAATATAACGAT  
GCTCTCCAGATAAATGACACCATCCGAATGGTGGATGCGTACAATCACCTAAAGAACTTTT  
ATAAGGAGGAGAAAAAGTAAGAAGACAGTAAGGAATGATGGTGATGATGAACCAGCAGTATC  
AAAACAGGATGAAACAGATGAATTTCTAATAGGTTTATTTTCATGCAAAAAAGAAGCAGCTGA  
AAGAGTTGGCTAGAAAGCCAGAATATGAAAATGAGAAGCTAATACAGTTGCGAAACACTTT  
AATGGAGGAGTTCACGAAGACTGAGGAACCTAGAGGAATTATTTTCACAAAGACTCGGCTA  
AGTGCCCTTTGCTCTATTCCAGTGGATTAAGGATAACCCAAAATTTGAAGAAGTGGGAATTAA  
GGCCCATATCTTATTGGTGCTGGACATAACAGTGAAATGAAACCCATGACTCAGAATGAG  
CAAAGGGAAGTTATTGATAAATTCGAGGTGGTAATGTAAATTTACTTATTGCTACTACTGT  
AGCTGAAGAAGGCCTAGACATCAAAGAATGTAACATCGTTATTGCTATGGCCTCGTCACC  
AATGAAATTGCTATGGTGCAGGCTCGTGGTCGAGCTCGTGCTGATGAGAGCACCTATGCA  
CTTGTGGTGTCAAGTGGCTCAGGAGCTGTTGAACGTGAAGATGTTAATATTTTCCGTGAGG  
AAATGATGTATAAGGCCATTCAGCGTGTCCAGAAGATGCCACGGGAAGAGATTTTAAATAA  
GATTCAGGATTTCCAGTTGCAAAGTATAGTGGAATAAATGAAGACAAAGAGAGATCAG  
TGCAAGACATGCAAGAAAAATCCTTCACTAATAACATTCCTATGCAAAAATTGCCACAAGCT  
GATATGTTCTGGAGAAGACATACAAGTTATTGGAAACATGCATCATGTGAGTGTAATAAAG  
ATTTCCAAAGTCTTTACCATATAAGAGAAAATAAGACACTGCAAGATAAGCATGCTGATTAC  
CAGACAAATGGGGAAATTATATGTAAAGACTGTGGACAAGCTTGGGGAAACATGATGGTTC  
ACAGAGGTCTTGACCTGCCTTGCTTAAATTAGAAATTTTGTGGTTGTGTTTGAAGACAAG  
AAAACACCAAAGCAAATGTTTAAGAAATGGGGAGAAGTGGCCATCAGGTTCCCTAATTTTAA  
TTATGCAGCTCATTGCCCTTCAAGTGATGAAGAT

>pterocles\_gutturalis-ciconiiformes-mda5

ATGGCAGAGGATTCCCGAGACGAGTGCTTCCTCTACTTGATCTCCTGCTTCAGGCCGCGG  
CTGAAGCAGTTCATCCGGGTGCAGCCGGTGCTGGACCAGCTCCCCTCGCTGAGCGCAGA  
GGACAAGGAGAAGGTGCGGACGGCCGCCCTGCAGCGGGGCGATGTGGAGGGGGCGGA  
GGAGCTGCTGCGGGCCGTGGAGAGGGGACCCCGCGGGTGCGGCTGGTTCCACGAGTTC  
CTGCAGGCCCTGGAACACGGTGGCTGCAGCCTGGCCGCTTGCTACCTGAACCCAGCCT  
CAGCCAGCTGCCCTCACCAGCCGAGGAGGCGGACCACGACCTCTGCGTGCACTTGGTGC  
AGCTGCTCCACAGCACACTGGTGGATAAAATGCAGGCCATGCAGGTGGCCGAGAAATGCC  
TGCAGATGGACATTTTCCAGGAGGAGGACCTGGATCGGATCCGCACTGTTACTGAAATC  
GTGGGAACAGAGATGGTGAAGGGAGCTACTGAGCAGAATAGTGCAGAAGAAAGATTGGT  
TCTCTCCTTTTTTGGTTGCTCTGCGTGAAACCCAACATGGAGGCCTTGACAGATGATTTGAG  
TGGAATAACAGGAGGAACAGAGAATAGACAAAATGGGATGAAGAACAGTACAAACGGAGA  
AACAGAAGTTACAGGCCAACCAGGATATGCTGTAGTGAAT-----

GAAGAAAATGTGAATGATGGTTTCAGCAATGAGAACAGTGTATTGGAAGCATCTATTGGAA  
AGAATTCTGTAGTTTCAGAGTCAGATGTCTCCATAGGAGATGGAAGTGTGAGTAACCTTGAAT  
GAAAACCTGGGACAGAGCTGCACAACCACTGAGTCAGATGACGATGAAGTGGAGAGCAGA  
GCTTCACCTGAGCCGGATCTGATCCTGAGAGATTACCAGATGGAAGTGGCAAAGCCAGCA  
CTGAATGGGGACAATATTATAATATGTCTCCCTACAGGCAGTGGTAAACTAGAGTGGCTG  
TTTACATTACGAAAGATCACTTGGATAAGAAGAAAAGAGCATCAGAGCCTGGAAAAGTTATC  
GTACTTGTTAATAAGGTACCATTGGTAGAACAGCATTTACGAAAGGAGTTTAAATCCATTCCCT  
GAAGCGTTGGTATCATGTTATTGGTTTAAGTGGTGATTCTCAGCTGAAAATCTCATTTCCCTG  
AAGTTGTCAGAAAAAATGATGTCATCATCAGTACAGCACAGATCCTTGAGAATTCAGTGTTA  
AAGGCAGCCGAAGAAGATGAAGAAGGTGTCCACTTATCAGATTTTTCACTCATCATTATTGA  
TGAGTGTATCATACTCAAAGGAAGGTGTCTACAACAATATAATGCGACGTTACTTAAAG  
AGAAGATGAAGAACAGGAAGCTGGCAAAGAAAACAAACCACTGATCCACAGCCTCAGA  
TTTTGGGACTTACAGCCTCACCTGGTGTAGGAGGTGCAACATCCTACGCAAAGCTGAAGA  
ACATATTCTGAAAATCTGTGCCAATCTTGATGCATGTAGAATCATGACTGTTGAAGAGCATG  
CCTCCCACTGAAGAATCAGGTGAAGGAACCATTTAAGAAAATGTGATTGCTGATGACAA  
AAGAAGGGATCCATTGAGAGAGAAAATTACTGAGATCATGAAAGACATCCAAAATATTGC  
CAGCTTTACCCAAAATCTGAGTTTGGAACTCAGCCATATGAACAGTGGGTGATTAGAGAAG  
AGAGAAAAGCTGCAAAGAAGAAAAACGCAAGGAACGTGTCTGTGCAGAACACTTGAAGA  
AATACAATGATGCTCTACAGATAAATGACACCATCCGAATGGTGGACGCGTACAACCACCT  
AAATGACTTTTATAAGGAGGAGAAAAAGTAAGAAGACAGTAAGGAGTAATGATGATGATGAA  
CCAGAAGTATCAAACAGGATGAAACAGATGAATTTCTAATAGGTTTATTTAATGCAAAAAA  
AAAACAGCTGAAAGAGTTGGCTAGAAAGCCAGAATATGAAAATGAGAAGCTAATACAGTTG  
CGAAACACTTTAATGGAGGAGTTCACGAAGACTGAGGAACCTAGAGGAATTATTTTACAA  
AGACGCGGCTAAGTGCATTTGCTCTATTCCAGTGGATTAAGGACAACCCAAAATTTGAAGA  
AGTGGGAATTAAGGCCCATTTCTTATTGGTGCTGGACATAACAGTGAAATGAAACCCATG  
ACTCAGAATGAGCAAAGGGAAGTTATTGATAAATTCCGAGGTGGAAATGTAAATTTACTTAT  
TGCTACTACTGTAGCTGAAGAGGGCCTAGACATTAAAGAGTGTAACATCGTTATTCGCTAT  
GGCCTGGTCACCAATGAAATTGCTATGGTGCAGGCTCGTGGTTCGAGCTCGAGCTGATGAG  
AGCACCTATGCACTTGTGGCTTCGAGTGGCTCAAGAGCTGTTGAACGTGAAGATGTTAATA  
TTTTCCGTGAGAATATGATGTATAAGGCCATTGAGCGTGTCCAGAAGATGCCCCAGGAAGA  
CTATTTAAAGAAGATTGAGAATTTCCAGTTGCAAAGTATAGTGGAAAAACAAATGAAGGCAA  
AGAGAGATCAGCACAAAGACATACAAGAAAAATCCTTCACTAATAACATTCCCTATGCAAAAAT  
TGCCACAAGTTGATATGTTCTGGAGAAGACATACAAGTTATTGAAAACATGCATCATGTCAG  
TGTGAAAAAAGATTTCCAAAGCCTTTACCATACAAGAGAAAATAAGACGCTGCAAGATAAGC  
ATGCCGATTACCAGACAAATGGGGAAATTATATGTAAAGATTGTGGACAAGCTTGGGGAAA  
TATGATGGTTCACCGAGGTCTTGACCTTCCTTGTCTTAAGATTAGAAATTTGTGGTTGTGT  
TTGAAGACAAGAAAACAACAAGCAAATTTTTAAGAAATGGGGAGAACTGCCTGTCAGGTT  
CCCTAGTTTTGATTATGCAGCTCATTGTCCTTCAAGTGATGAAGAT

>mesitornis\_unicolor-gruiformes-mda5

ATGGCAGAGGAGTCCCGAGACGAGCGCTTCCTCTACATGATCTCCTGCTTCAGGCCGCGG  
CTGAAGCAGTTCATCCGGGTGCAGCCGGTGCTGGACCGGCTTCCTTACTGAGCAGAGAG  
GAGAGGGAGAAGGTGCGGGCGGCGGCCCTGCAGCGGGGCGAGGTGGCGGGGGCGGAG  
GAGCTGCTGCGGGCCGTGGAGCGGGGACCCCGCGGGTGCGGCTGGTTCCACGAGTTCC  
TGCAGGCGCTGGAGCAGAGTGGCTGCAGCCTGGCCGCCTGCTACATGAACCCAGCCTC

AGCCAGCTGCCCTCGCCAGCCGAGGAGGCCGACCACGACCTCTGTGTGCACTTGTTGCA  
GCTGCTCCACAGCTCACTGGTGGATAGAATGCGCACCGTGCAGGTGGCCGAGAAGTGTCT  
GCAGATGGGCATCTTCCAGGAGGAGGACCTGGATCGGATCCACACTGTTACTGAAAATCA  
TGGAACAAAGATGGTGCAAGGGAGCTATTGAGCAGAATAGTGCAGAAGAAAGATTGGTT  
CTCTCCTTTTTTGATTGCTCTGCGTGAAACCCAACATGGAGACCTTGCAGATGATTTAAGTG  
GAAATACAGGAGGAACAGAGAACAGACAAAATGGGATGAAGAAGAGTACAAATGAAGAAA  
CAGAAGTTACAGGTCAACCAGGATATGCCATAGTGGAGGATTTGAAACAGCAAGAAAATAT  
GAATGATAGTTTCAGCAATGAGACCAGTGTGTTGGAAACAATAATGGAAAGAATTCCATA  
GTTTCAGAGTCGGATGTCTCCATAGGAGATGGAAGCGTCAGTAACTTGAATGAAAACCTGG  
GACAGAGCTGCACGACC-----  
AATGAAGATGAAGTGGAGAGCAGAGCTTCACCTGAGCCAGATCTGATCCTGAGAGATTAC  
CAGATGGAAGTTGCAAAGCCAGCACTGAATGGGGAGAACATTATTATATGTCTCCCTACAG  
GCAGTGGTAAAACCAGAGTGGCTGTTTACATTACCAAAGATCACTTAGATAAGAAGAAAAG  
AGCATCAGAGCCTGAAAAAGTTATAGTACTTGTTAATAAGGTACCGTTAGTAGAACAGCATT  
TACGAAAGGAGTTTTAATCCATTCCTGAAGCGCTGGTATCAGGTTATCGGTTTTAAGTGGTGA  
TTCTCAGCTGAAAATCTCATTTCCTGAAGTTGTCAGAAGAAATGATGTCATCATCAGCACAG  
CACAGATCCTTGAGAATTCAGTGTAAATGCAGCCAAAGAGGATGAAGAAGGTGTCCACTT  
ATCAGATTTTTTCACTCATCATTATTGATGAGTGTATCAGCTCAGAAAGGAAGGTGTCTACA  
ACAATATAATGCGACGTTACTTAAAAGAAAAGATGAAGAACAGGAAGCTGGCAAAAGAAAA  
CAAACCACTGACCCACAGCCTCAGATTCTGGGACTTACAGCCTCACCTGGTGTAGGAGG  
TGCAACATCCAACCTCAAAAGCTGAAGAACATATTCTGAAAATCTGTGCCAATCTTGATGCGT  
GTAGAATCATGACTGTTGAAGAGCATGCCTCCCAGCTGAAGAACCAGGTGAAGGAACCGT  
ATAAGAAGACTGTGATTGCAGATGACAAAAGAAGGGATCCATTTAGAGAGAGAATTACTGA  
GATCATGACAGACATTCAAACTATTGCCAGTTCTATCCAAAATCCGAGTTTGGAAGTCAAGC  
CATATGAACAGTGGGTGATTAGAGAAGAAAGAAAAGCTGCAAAAGAAGAAAAGCGCAAGG  
AACGTGTCTGTGCAGAACACTTGAAGAAATACAATGATGCTCTGCAGATAAATGACACCAT  
CCGAATGGTGGATGCATACAATCACCTAAATAACTTTTTATAAGGAGGAGGAAAGTAAGAAG  
ACGGTAGGGAGTGATGATGATGATGAACCAGCAGTATCAAAACAGGATGAAACAGATGAAT  
TTCTTATAGTTTTATTTTCATGCAAAAAAGAACTGCTGGAAGAGTTGGCTAGAAAGCCGGAA  
TATGAAAATGAGAAGCTCATACAGTTGCGAAACACTTTAATGGAGGAATTCACAAAGACTGA  
GGAACCTAGAGGAATTATTTTCACAAAGACTCGGCTTAGTGCCTTTGCTCTATTCCAGTGG  
ATTAAGGATAACCCAAAATTTGAAGAAGTGGGAATTAAGGCCATTATCTTATTGGAGCTGG  
ACATAACAGTGAAATTAACCCATGACTCAGAATGAGCAAAGAGAAGTTATTGATAAATTCC  
GAGGTGGAATGTAAATTTACTTATTGCTACCACTGTAGCTGAGGAAGGCCTAGACATCAA  
GGAGTGTAACATCGTTATTTCGCTATGGCCTTGTACCAATGAAATTGCTATGATGCAGGCT  
CGTGGTCGAGCTCGAGCTGATGAGAGCACCTATGCACTTGTGGCCTCAAGTGGCTCAGGA  
GCTGTTGAACGTGAAGATGTTAATTTTTCCGTGAGAAAATGATGTACAAGGCCATTACAGC  
GTGTCCAGAAGATGCCACAGGAAGAGTATTTAAATAAGATTCAGAATTTCCAGTTGCAAAGT  
ATAGTGGAAAAACAAATGAAGGCCAAAGAGAGATCAGCACAAGACATACAAGAAAAATCCTT  
CACTAATAACATTCCATGCAAAAATTGCCACAACTGATATGTTCTGGAGAAGACATACAA  
GTTATTGAACACATGCATCATGTCAAGTGTAAGAAGATTTCCAAAGTCTTTACCATACAAG  
AGAAAACAAGACACTGCAAGATAAGCATGCCGATTACCAGACAAATGGGGAAATTATATGT  
AAAGATTGTGGACAAGCTTGGGGAAATATGATGGTTTACCGAGGTCTTGACCTGCCTTGTG  
TAAAGATTAGAAATTTTGTGGTTGTGTTTGAAGACAAGAAAACAACAAAGCAAATTTTTAAGA

AATGGGGAGAACTGCCCATCAGGTTCCCTAGTTTTGATTATGCAGCTCATTGTCCTTCAAG  
TGATGAAGAT

>tyto\_alba-strigiformes-mda5

ATGGCAAAGGAGTCCCGAGACGAGCGCTTCCTCTACATGATCTCCTGCTTCAGGCCGCGG  
CTGAAACAGTTCATCCGGGTGCAGCCGGTGCTGGACCAGCTCCCCTCGCTGAGCGCGGA  
GGAGAGGGAGAAAGGTGCGGGGCGGCCGCCCTGCAGCGGGGCGAGGTGGAGGGGGCGGA  
GGAGCTGCTGCGGGCCGTGGAGCGGGGGCCCCGCGGGTGCGGCTGGTTCCACGAGTTC  
CTGCAGGCGCTGGAGCAGGGCGGCTGCAGCCTGGCCGCCTGCTACGTGAACCCAGCCT  
CAGCCAGCTGCCCTCGCCGGCCGAGGAGGCCGACCACGACCTCTGCGTGCACCTGGTGC  
AGCTGCTCCACAGCACACTGGTGGAGAGAATGCAGACCATGCAGGTGGCCGAGAAGTGC  
CTACAGATGGGCATCTTCCAGGAGGAGGACCTGGACCGGATCCACACTGTTACTGACAAT  
CGTGGGAACAGAGATGGTGCAAGGGAGCTACTGAGCAGAATAGTGCAGAAGAAAGATTGG  
TTCTCTCCTTTTTTTGATTGCTCTGCGTGAAACCAAACATGGAGACCTTGAGATGATTTAAG  
CGGAAATACGGGAGGAACAGAGAATAGACAAAATGGGATGAAGAACAGTACAAATGAAGA  
AACAGAAGTTACATGCCAACCAGGATATGCTGTAGTAGAGGATTTGAAACAGCAAGAAAAT  
GTGAATGATAGTTTCAGCAGTGAGAACAGTGTATTGGAAATATCTATTGGAAATAATTCTTT  
GGTTTCAGAGTCAGATGTCTCCATAGGAGATGGAAGTGTGAGTAACTTCAATGAAAACCTG  
GGGAAGAGCTTCACAACCAGTGATTGAGATGAAGAAGAAGAGGAGAGCAGAGCTTCACCT  
GAGCCAGATCTGATCCTGAGAGATTACCAGATGGAAGTTGCAAAGCCCGCACTGAATGGG  
GAGAATATTATCATATGTCTCCCTACAGGCAGTGGTAAAACCAGAGTGGCTGTTTACATTAC  
CAAAGATCACTTGGATAAGAAGAAAAGAGCATCAGAGCCTGGAAAAGTTATAGTACTTGTT  
AATAAGGTACCATTTGGTGGAACAGCATTTACGAAAAGAGTTTAATCCATTCTGAAGCACTG  
GTATCAGGTTATTGGTTTAAGTGGTGATTCTCAGCTGAAAATTTCAATTCCTGAAGTTGTCA  
GAAGAAATGATGTCATCATCAGTACAGCACAGATCCTTGAGAATTCAGTGTTAAATGCAGAC  
AAAGAAGATGAAGAAGGTGTCCACTTATCAGATTTTTCACTCATCATAATCGATGAATGTCA  
TCACACTCAGAAGGAAGGTGTCTACAACAATATAATGCGACGTTACTTAAAAGAAAAGATGA  
AGAACAGGAAGTTGGCAAAAGAAAACAAGCCACTGATCCCACAGCCTCAGATTCTGGGAC  
TTACGGCCTCACCTGGTGTAGGAGGTGCAACATCCCCTTAAAAGCTGAAGAACATATTCT  
AAAAATCTGTGCCAATCTTGATGCATGTAGAATCATGACTGTTGAAGAGCATGCCTCCCAG  
TTGAAGAATCAGGTGAAGGAACCATATAAGAAGACTGTGATTGCAGATGACAAGAGAATGG  
ATCCATTTAGAGAGAGAATTACTGAGATCATGACAGACATTCAAACTATTGCCAGCTTCAT  
CCAAAATCTGAGTTTGGAACTCAGCCATATGAACAGTGGGTGATTAGAGAAGAGAGGAAAG  
CTGCAAAAGAAGAAAAACGCAAGGAACGTGTCTGTGCGGAACACTTGAAGAAATACAATGA  
TGCTCTCCAGATAAATGACACCATCCGAATGGTGGATGCATACAATCACCTAAATAACTTTT  
ATAAGGAGGAGAGAAAAGTAAGAAGACAGTAAGGAGTGATGATGATGATGAACCAAGTAGTATC  
AAAACAGGATGAAACGGATGAATTTCTAATAGGTTTATTTTCATGCAAAAAAGAAACAGCTGA  
AAGAGTTGGCTAGAAAGCCAGAATATGAAAATGAGAAGTTAATACAGTTGCGAAACACATT  
AATGGAGGAGTTCACGAAGACTGAAGAACCTAGAGGAATTATTTTCACAAAGACTCGGCTA  
AGTGCCCTTTGCTCTATTCCAGTGGATTAAAGATAACCCAAAATTTGAAGAAGTGGGAATTAA  
GGCCATTATCTCATTGGTGCTGGCCATAACAGTGAAATTAAACCCATGACTCAGAATGAG  
CAAAGGGAAGTTATTGATAAATCCGAGGTGGAAATGTAAATTTACTTATTGCTACTACTGT  
AGCTGAGGAAGGCCTAGACATCAAAGAGTGCAACATTGTTATTCGCTATGGCCTTGTCAAC  
AATGAAATTGCTATGTTGCAGGCTCGTGGTGCAGCTCGGGCTGATGAGAGCACCTATGCA  
CTCGTGGCTTCGAGTGGCTCAGGAGCTGTTGAACGTGAAGATGTTAATATTTTCCGTGAGA

AAATGATGTATAAGGCCATTCAACGTGTTTCAGAAAATGCCACAGGAAGAATATTTATATAAG  
ATTCATAATTTCCAGTTGCAAAGTATAGTGGAACACAGATGAAGGTGAAGAGAGATCAAC  
GCAAGACATACAAGAAAAATCCTTCACTGATAACATTCTATGCAAAAATTGCCACAAGCTA  
ATATGTTCTGGAGAAGACATACAAGTTATTGAAAACATGCATCATGTCAGTGTGAAAAAGA  
TTTCCAAAGTCTTTACCATACAAGAGAAAATAAGACATTGCAAGATAAGCATGCCGATTACC  
AGACAAATGGGGAAATTATATGTAAAGATTGTGGACAAGCTTGGGGAAATATGATGGTTCA  
CCGAGGTCTTGACCTGCCTTGTCTAAAGATTAGGAATTTTGTGGTTGTGTTTGAAGACAAG  
AAAACAACAAAGCATATTTTAAAGAAATGGGGGAGAACTGCCCATCATGTTCCCTAGTTTTGA  
TTATGCAGCTCATTGTCCTTCAAGTGATGAAGAT

>nannopterum\_brasilianum-pelecaniformes-mda5

ATGGCAGAGGCGTCCCGAGACGAGCGCTTCCTCTACATGATCTCCTGCTTCAGGCCGCGG  
CTGAAGCAGTTCATCCGGGTGCAGCCGGTGTGGACCGGCTGCCCTCGCTGAGCGCCAA  
GGACAGGGAGAAGGTGCGGGCGGTGGCCCTGCAGCAGGGCGAGGTGGAGGGGGCAGA  
AGAGCTGCTGCGGGCCGTGGAGCGGGGACCCGCGGGTGCGGCTGGTTCCACGAGTTC  
CTGCAGGCACTGGAGCACGGCGGCTGCAGCCTGGCCGCCTGCTACGTGAACCCAGCCT  
CAGCCAGCTGCCCTCGCCGGCCGAGGAGGCCGACCACGACCTCTGCGTGCACTTGGTGC  
AGCTGCTCCACAGCACGCTGGTGGACAGAATGCAGACCATGCAGGTGGCCGAGAAGTGC  
CTGCAGATGGGCATCTTCCAGGACGAGGACCTGGATCGGATCCCACTGTTACTGACAAT  
CGTGGGAACAGAGACGGAGCAAGGGAGCTGTTGAGCAGAATAGTGCAGAAGAAAGATTG  
GTTCTCTCCTTTTTTGATCGCTCTGCGTGAAACCCAACACGGAGGCCTTGCAGATGATTTA  
AGTGGAAATACAGGAGGAACAGAGAATAGACAGAATGGGGTGAAGGACAATACAAATGAA  
GAAACAGAAGTTACAAGCCAACCAGAATATGCTGTAATGAAGGATTGAAACAGCAAGAAA  
ATTTGAATAGTAGTTTCAGCAGTGAGAACAGTGTATTGGAACATCTATTGGAAGAATTCT  
GTAGTTTCAGAGTCAAATGTCTCCATCGGAGATGAAAGTGTGAGTAACCTGAATGAAACCT  
GGGACAGAGCTGCACAACCAGTCATTGAGATGAAGATGAAATGGAGAGCAGAGCTTCACC  
TGAGCCTGATCTGATCCTGAGAGATTACCAGATGGAGGTTGCAAGGCCAGCACTGAATGG  
GGAGAATATTATAATATGCCTCCCTACAGGCAGTGGTAAAACAGAGTGGCTGTTTACATT  
ACCAAAGATCACTTGGATAAGAAGAAAAGAGCATCAGAGCCTGGGAAAGTTATAGTACTTG  
TTAATAAGGTACCGTTGGTAGAACAGCATTACGAAAGGAATTTAATCCATTCTGAAGCGT  
TGGTATCAAGTTACTGTTTAAAGTGGTGATTCTCAGCTGAAAATCTCATTTCCTGAAGTTGT  
CAGAAGAAATGATGTCATCATCAGTACAGCACAGATCCTTGAGAATTCAGTGTAAATGCAG  
CCGAAGAAGATGAAGAAGGTGTCCACTTATCAGACTTTTCACTCATCATTATTGATGAGTGT  
CATCACACTCAAAAGGAAGGTGTCTACAACAATATAATGCGACGTTACTTAAAAGAAAAGAT  
GAAGAACAGGAAGCTGGCAAAAGAAAACAAACCACTGATCCCACAGCCTCAGATTCTGGG  
ACTTACAGCCTCACCTGGTGTGGGAGGTGCAACATCCTACTCAAAGCTGAAGAACATATT  
CTGAAAATCTGTGCCAATCTGGATGCATATAGGATCATGACTGTCGAAGAGCACGCCTCCC  
AACTGAAGAATCAAGTGAAGGAACCATATAAGAAGACTGTGATCGCAGATGACAAAAGAAG  
GGATCCATTTAGAGAAAGAATTACTGAGATCATGACAGACATTCAAACCTATTGCCAGCTCC  
ATCCAAAATCTGAGTTTGGAACTCAGCCATATGAACAGTGGGTGATCAGAGAAGAGAGAAG  
AGCTGCAAAAGAAGAAAAACGCAAGGAACGTGTCTGTGCAGAACTTGAAGAAATACAAT  
GATGCTCTCCAGATAAATGACACCATCCGAATGGTGGATGCGTACAATCACCTAAATAACT  
TTTATAAGGAGGAGAAAAGTAAGAAGACCGTAAGGAGCGATGATGATGATGAACCAGCAGT  
ATCAAAACAGGATGAAACAGATGAATTTCTAATAGGTTTATTTATGCAAAAAAGAAACAGC  
TGAAAGAATTGGCTAGAAAGCCAGAATATGAAAATCAGAAGCTAATACAGTTGCGAAACAC



TTTAATGGAAGAGTTCACGAAGACAGAGGAACCTAGAGGAATTATTTTCACAAAGACTCGG  
CTAAGTGCCTTTGCTCTATTCCAGTGGATTAAGGATAACCCAAAATTTGAAGAAGTGGGAAT  
TAAGGCCCATTTATCTTATTGGTGCTGGACATAACAGTGAAATTAAACCCATGACTCAGAATG  
AGCAAAGGGAAGTTATTGATAAATTCCGAGGTGGGAATATAAATTTACTTATTGCTACTACT  
GTAGCTGAGGAAGGCCTGGACATCAAAGAGTGTAACATCGTTATTCGCTATGGCCATGTCA  
CCAATGAAATTGCTATGGTGCAGGCTCGCGGTGAGCTCGAGCTGATGAGAGCACCTATG  
CACTTGTGGCTTCGAGTGGCTCAGGAGCTATTGAACGTGAAGATGTTAATATTTTCCGAGA  
GAAAATGATGTACAAGGCCATTACGCGTGTCCAGAACATGCCACAGGAAGAGTATTTAAAT  
AAGATTCAGAATTTCCAGTTGCAAAGTATAATGGAAAAACAAATGAAGGCCAAAGAGAGACC  
AGCGCAAGACATACAAGAAAAATCCTTCACTAATAACATTCCTATGCAAAAATTGCCACAAG  
CTGGTATGTTCTGGAGAAGATATACAAGTTATTGAAAACATGCATCATGTCAAGTGTGAAAA  
AGATTTCCAAAGTCTTTACCATACAAGAGAAAATAAGACACTGCAAGATAAGCATGCTGATT  
ACCAGACAAATGGGGAAATTATATGTAAAGATTGTGGACAAGCTTGGGGAAATATGATGGT  
TCACCGAGGCCTTGACCTGCCTTGTGTAAAGATTAGAACTTTGTGGTTGTGTTTGAAGAC  
AAGAAAAACAATAAAGCAAATTTTTTAAGAAATGGGGGAGAACTGCCCGTCACGTTCCCTAGTTT  
TGATTATGCAGCTCATTGTCTTCAAGTGATGAAGAT

>phalacrocorax\_pelagicus-pelecaniformes-mda5

ATGGCAGAGGCGTCCCGAGACGAGCGCTTCCTCTACATGATCTCCTGCTTCAGGCCGCGG  
CTGAAGCAGTTCATCCGGGTGCAGCCGGTGTGGACCGGCTGCCCTCGCTGAGTGCCGT  
GGACAGGGAGAAGGTGCGGGCGGTGGCCCTGCAGCAGGGCGAGGTGGAGGGGGCAGA  
GGAGCTGCTGCGGGCCGTGGAGCGGGGACCCCGCGGGTGCAGGCTGGTTCCACGAGTTC  
CTGCAGGCACTGGAGCACGGCGGCTGCAGCCTGGCCGCTGCTACGTGAACCCAGCCT  
CAGCCAGCTGCCCTCGCCGGCCGAGGAGGCCGACCACGACCTCTGCGTGCATTGGTGC  
AGCTGCTCCACAGCACGCTGGTGGACAGAATGCAGACCATGCAGGTGGCCGAGAAGTGC  
CTGCAGATGGGCATCTTCCAGGACGAGGACCTGGATCGGATCCACACTGTTACTGACAAT  
CGTGGGAACAGAGATGGTGCAGGGAGCTGTTGAGCAGAATAGTGCAGAAGAAAGATTGG  
TTCTCTCCTTTTTTATCGCTCTGCGTGAAACCCAACACGGAGGCCTTGCAGATGATTTAA  
GTGGAAATACAGGAGGAACAGAGAATAGACAGAATGGGGTGGAGGACAATACAAACGAAG  
AAACAGAAGTTACAAGCCAACCAGAATATGCTGTAATGAAGGATTCGAAACAGCAAGAAAA  
TTTGAATAGTAGTTTCAGCAGAGAGAACAGTGTATTGAAACATCTATTGGAAAGAATTCTG  
TAGTTTCAGAGTCAGATGTCTCCATCGGAGATGAAAGTGTGAGTAACCTGAATGAAAACCT  
GGGACAGAGCTGCACAACCAGTCATTACAGATGAAGATGAAATGGAGAGCAGAGCTTCACC  
TGAGCCTGATCTGATCCTGAGAGATTACCAGATGGAGGTTGCAAGGCCAGCACTGAATGG  
GGAGAATATTATAATATGCCTCCCTACAGGCAGTGGTAAAACCAGAGTGGCTGTTTACATT  
ACCAAAGATCACTTGGATAAGAAGAAAAGAGCATCAGAGCCTGGAAGTTATAGTACTTG  
TCAATAAGGTACCGTTGGTAGAACAGCATTTACGAAAGGAATTTAATCCATTCCTGAAGCGT  
TGGTATCAAGTTACTGGTTTAAAGTGGTGATTCTCAGCTGAAAATCTCATTTCCTGAAGTTGT  
CAGAAGAAATGATGTCATCATCAGTACAGCACAGATCCTTGAGAATTCAGTGTAAATGCAG  
CCGAAGAAGATGAAGAAGGTGTCCACTTATCAGACTTTTCACTCATCATTATTGATGAGTGT  
CATCACACTCAAAGGAAGGTGTCTACAACAATATAATGCGACGTTACTTAAAGAAAAGAT  
GAAGAACAGGAAGCTGGCAAAAGAAAACAAACCACTGATCCACAGCCTCAGATTCTGGG  
ACTTACAGCCTCACCTGGTGTGGGAGGTGCAACATCCTACTCAAAGCTGAAGAACATATT  
CTGAAAATCTGTGCCAATCTGGATGCATATAGGATCATGACTGTGCAAGAGCACGCCTCCC  
AGCTGAAGAATCAAGTGAAGGAACCATATAAGAAGACTGTGATCGCAGATGACAAAAGAAG

GGATCCATTTAGAGAAAGAATTACTGAGATCATGACAGACATTCAAAACTATTGCCAGCTCC  
ATCCAAAATCTGAGTTTGGAACTCAGCCATATGAACAGTGGGTGATCAGAGAAGAGAGAAG  
AGCTGCAAAAGAAGAAAAACGCAAGGAACGTGTCTGTGCAGAACACTTGAAGAAATACAAT  
GATGCTCTCCAGATAAATGACACCATCCGAATGGTGGATGCATACAATCACCTAAATAACTT  
TTATAAGGAGGAGAAAAAGTAAGAAGACTGTAAGGAGCGATGATGATGATGAACCAGCAGTA  
TCAAAACAGGATGAAACAGATAAATTTCTAATAGGTTTATTTTCATGCAAAAAAGAAACAGCT  
GAAAGAATTGGCTAGAAAGCCAGAATATGAAAATCAGAAGCTAATACAGTTGCGAAACACT  
TTAATGGAAGAGTTCACGAAGACAGAGGAACCTAGAGGAATTATTTTCACAAAGACTCGGC  
TAAGTGCCTTTGCTCTATTCCAGTGGATTAAGGATAACCCAAAATTTGAAGAAGTGGGAATT  
AAGGCCCATTTATCTTATTGGTGCTGGACATAACAGTGAAATTAACCCATGACTCAGAATGA  
GCAAAGGGAAGTTATTGATAAATCCGAGGTGGGAATATAAATTTACTTATTGCTACTACTG  
TAGCTGAGGAAGGCCTGGACATCAAAGAGTGTAACATCGTTATTCGCTATGGCCACGTCAC  
CAATGAAATTGCTATGGTGCAGGCTCGCGGTGAGCTCGAGCTGATGAGAGCACCTATGC  
ACTTGTGGCTTCGAGTGGCTCAGGAGCTATTGAACGTGAAGATGTTAATAATTTCCGTGAG  
AAAATGATGTATAAGGCCATTCAGCGTGTCCAGAACATGCCACAGGAAGAGTATTTAAATA  
AGATTCAGAATTTCCAGTTGCAAAGTATAATGGAAAAACAAATGAAGGCAAAGAGAGACCA  
GCGCAAGACATACAAGAAAAATCCTTCACTAATAACATTCCTATGCAAAAATTGCCACAAGC  
TGGTATGTTCTGGAGAAGATATACAAGTTATTGAAAACATGCATCATGTCAGTGTGAAAAAA  
GATTTCCAAAGTCTTTACCATACAAGAGAAAAATAAGACACTGCAAGATAAGCATGCTGATTA  
CCAGACAAATGGGGAAATTATATGTAAAGATTGTGGACAAGCTTGGGGAAATATGATGGTT  
CACCGAGGCCTTGACCTGCCTTGTGTAAAGATTAGAACTTTGTGGTTGTGTTTGAAGACA  
AGAAAACAATAAAGCAAATTTTTAAGAAATGGGGAGAACTGCCCGTCACGTTCCCTAGTTTT  
GATTATGCAGCTCATTGTCCTTCAAGTGATGAAGAT

>leptosomus\_discolor-coraciiformes-mda5

ATGGCGGGGGAGTGCCGAGACGAGCGCTTCCTCTACATGATCGCCTGCTTCAGGCCGCG  
GCTGAAGCAGTTCATCCGGGTGCAGCCGGTGCTGGACCTGCTTCCCTCGCTGAGCGCCG  
AGGACAGGGAGAAGGTGCGGGCGGCCGCCCGGCAGCGGGGCGAGGKGGAGGGGGCGG  
AGGAGCTGCTGCGGGCCGTGGAGCGGGGTCCCCGCGGGTGCGGCTGGTTCCACGAGTT  
CCTGCAGGCGCTGGAGSGCGGTGGCTGCAGCCYGGCCGCCTGCTACGTGAACCCAGCC  
TCAGCCAGCTGCCCTCGCCGGCCGAGGAGGCTGACCACGACCTCTGCGTGCATTTGGTG  
CAGCTGCTCCACAGCACCCCTGGTGGACAAAATGCAGGCCGTGCAGGTGGCCGAGAAGTG  
CCTGCAGATGGGAATCTTCCAGGACGAGGACCTGGATCGGATCCACACTGTTACTGAACA  
CTGTGGGAACAGAGATGGTGCAAGGGAGCTATTGAGCAGAATAGTGCAAGAAGAAAGATTG  
GTTCTCGCCTTTTTGATTGCTCTGCGTGAAACCCAACATGGAAGCCTTGCAAGATGATTTAA  
GCGGAAATACAGGAGGAACAGAGAATAGACAAAATGGGATGAAGAAAAGTACAAACGAAG  
AAACAGAAGTTACAGACCAACCAGGATATGCCGTAGTGAGGATTTGAAAGAGCAAGAAA  
GTGTGAGTGATAGTTTCAGCAGTGAGAACAGTGATTGGAAACGTCTATTGGAGAGAATTC  
TGTAAGTTTCA-----

GATTTCTTCATAGAAGATGGAAGTGTCAGTAACTTCAATGAAAACCTGGGACAGAGCTGCA  
CAACCAGTGATTCAGATGAAGATGAAGTGGAGAGCAGAGCTTCACCTGAGCCAGATCTGA  
TCCTGAGAGATTACCAGATGGAAGTTGCAAAGCCAGCACTGAATGGGGAAAATATTATAAT  
ATGTCTCCCTACAGGCTCTGGTAAAACCAGAGTGGCTGTTTACATTACCAAAGATCACTTG  
GATAAGAAGAAAAGAGCATCAGAGCCTGGAAAAGTTATAGTACTTGTTAATAAGGTACCGT  
TGGTAGAACAAACATTTACAAAAGGAGTTTAATCCATTCCTGAAGCGTTGGTATCAGGTTATT

GGTTTAAGTGGTGATTCTCAGCTGAAAATCTCATTTCTGAAGTTGTCAGAAGAAATGATGT  
CATCATCAGTACAGCACAGATCCTTGAGAATTCAGTGTAAATGCAACCAAAGAAGATGAA  
GAAGGGGTCCACTTATCAGATTTTTCTACTCATCATTATCGATGAGTGCCATCACACTCAAAA  
GGAAGGTGTCTACAACAATATAATGCGACGTTACTTAAAAGAAAAGATGAAGAACAGGAAG  
CTGGCAAAAGAAAACAAACCTCTGATCCACAGCCTCAGATTCTGGGACTTACAGCCTCAC  
CTGGTGTAGGAGGTGCAACATCCTACTCAAAAGCTGAAGAACATATTCTGAAAATCTGTGC  
CAATCTTGATGCATGTAGAATCATGACTGTGCAAGAGCATGCCTCCCAATTGAAGAATCAG  
GTGAAGGAACCGTATAAGAAGACTGTGATTGCAGATGACAAAAGAAGGGATCCATTTAGGG  
AGAGAATTACTGAGATCATGACAGACATTCAAAAGTATTGCCAGCTCCATCCAAAATCTGAG  
TTTGGAACCCAGCCGTATGAACAGTGGGTGATTAGAGAAGAGAGAAAAGCTGCTAAAGAA  
CAAAAACGCAAGGAACGTGTCTGTGCAGAACACTTGAAGAAATACAATGATGCTCTCCAGA  
TAAATGACACCATCCGAATGGTGGATGCATACAATCACCTCAATAACTTTTACAAGGAGGA  
GAAAAGTAAGAAGACAATAAGGAGTGATGATGATGATGAACCAGCAGTATCAAAACAGGAT  
GAAACAGATGAATTTCTGATAGGTTTATTTTCATGCAAAAAGAAAACAGCTGAAAGAGTTGGC  
TAGAAAGCCAGAGTATGAAAATGAGAAGCTAACACAGTTGCGAAACACTTTAATGGAGGAG  
TTCACGAAGACCGAGGAACCTAGAGGAATTATTTTACAAAGACTCGTCTAAGTGCCTTTG  
CTCTGTTCCAGTGGATTAAGGATAACCCAAAATTTGAAGAAGTGGGAATTAAGGCCATTAT  
CTTATTGGTGCTGGACATAACAGTGAAATTAACCCATGACTCAGAATGAGCAAAGGGAAG  
TTATCGATAAATTCCGAGGTGGAAATGTAAATTTACTTATTGCTACTACTGTAGCCGAGGAA  
GGCCTAGACATCAAAGAGTGTAACATCGTTATTCGCTATGGCCTCGTCACCAATGAAATTG  
CTATGGTGCAGGCCCGCGGTGCGAGCTCGATCTGATGAGAGCACCTATGCACTTGTGGCTT  
CAAGTGGCTCAGGAGCTGTTGAACGTGAGGATGTTAATATTTTCCGTGAGAAAATGATGTA  
TAAGGCCATTCAGCGTGTCCAGAAGATGCCGCGGGAAGAGTATTTGAATAAGATTCAGAA  
TTCCAGTTGCAAAGTGTAAGTGAAAAACAAATGAAGGCAAAGAGAGATAAGTGCAAGACAT  
ACAAGAAAAATCCTTCACTAATAACATTCTATGCAAAAATTGCCACAAGCTGGTATGTTCT  
GGAGAAGACATACAAGTTATTGAAAATATGCATCATGTCAGTGTGAAAAAGATTTCCAAAG  
TCTTTACCATACGAGAGAAAACAAGACACTGCAAGATAAGCATGCCGATTACCAGACAAAT  
GTCGAAATTATATGTAAAGACTGTGGACAAGCTTGGGGAAATATGATGGTTCACCGAGGTC  
TTGACCTGCCTTGTCTAAAGATTAGAAATTTTGTGGTTGTGTTTGAAGACAAGAAAACA  
AAGCAAATTTTTAAGAAATGGGGAGAACTGCTTGTGAGGTTCCCTAGTTTTGATTATGCAGC  
TCATTGTCCTTCAAGTGATGAAGAT

>sterna\_hirundo-charadriiformes-mda5

ATGGCAGAGGAGTGCCGAGACGAGCGGTTCTCTACATGATCTCCTGCTTCAGGCCGCGG  
CTGAAGCAGTTCATCCGGGTGCAGCCGGTGCTGGACCGGCTTCCCTCGCTGAGCCCGGA  
GGACAGGGAGAGGGTGCGGGCGGCCGCCCTGCAGCGCGGCGAGGTGGAGGGGGCAGA  
GGAGCTGCTGCGGGCCGTGGAGCGGGGTCCCCGCGGCTGCGGCTGGTTCCACGAGTTC  
CTGCAGGCGCTGGAGCAGGGCGGCTGCAGGCTGGCTGCCTGCTACGTGAACCCAGCCT  
CAGCCAGCTGCCCTCGGCGACCGAGGAGGCTGACCATGACCTCTGCGTGCACTTGGTG  
AGCTGCTCCACAGCACACTGGTGGATAAAATGCAGACCGTGAGGTGGCTGAGAAGTGCC  
TGCAGATGGGCATCTTCCAAGAGGACGACCTGGATCGGATCCACACTGTTACTGACAATC  
GTGGGAACAGAGATGGTGCGAGGGAGCTATTGAGCAGAATAGTGAGAAGAAAGACTGGT  
TCTCTCCTTTTTTGGTTGCTTTCGCTGAAACCCAACATGGAGACCTTGAGATGATTTAAGC  
GGAAATACAGGAGAAACAGAGAATAGACAAAATGGGATGAAGAACAGTACAAACGAAGAAA  
CAGAAGTTACAAGCCAACTAGGATATGCTGTAGCGGAGGATTTGAAACAGCAAGAGAATGT

GAATGGTAGTTTCAGCAGCGAGAACAGTGTATCGGAAACATCTATTGGAAAGAATTCTCTA  
GTTCCAGAGTCAGATGTCTCCATAGGAGATGGAAGTGTGAGTAACTTGAATGAAAACCTGG  
GACAGAGCTGCACAACCAAGTATTGAGAGGAAGATGAAGTGGAGAGCAGAGTTTCACCTG  
AGCCAGATCTGATCCTGAGAGATTACCAGATGGAAGTTGCAAAGCCAGCACTGAATGGGG  
AGAATATCATAATATGTCTGCCTACAGGCAGTGGTAAAACCAGAGTGGCTGTTTACATTACC  
AAAGATCACTTGGATAGGAAGAAAAGAGCATCTGAGCCTGGAAAAGTTATAGTACTTGTTA  
ATAAGGTACCGTTGGTAGAACAGCATTTACGAAAGGAGTTTAATCCATTCTGAAGCGTTG  
GTATCAGGTTATTGGTTTAAGTGGTGAATCTCAGCTGAAAATCTCATTTCTGAAGTTGTCA  
GAAGAAATGATGTCATCATCAGTACAGCACAGATCCTTGAGAATTCAGTGTAAATGCAGC  
CAAAGAAGATGAAGAAGGTGTCCACTTATCAGATTTTTCTACTCATCATTATTGATGAGTGTC  
ATCACACGCAAAAGGAAGGTGTCTACAACAATATAATGCGACGTTACTTAAAAGAAAAGAG  
GAAGAACAGGAAGCTGGCAAAAGAAAACAAACCACTGATCCACAGCCTCAGATTCTGGG  
ACTTACAGCCTCACCTGGTGTAGGAGGTGCAACATCCAACCTCAAAGCTGAAGAACATATT  
CTGAAAATCTGTGCCAATCTTGACGCACGTAGAATCATGACTGTTAAAGAGCATGCCTCCC  
AACTGAAGAACCAGGTGAAGGAACCGTATAAGAAGACTGTGATTGCAGATGACAAAAGAAG  
GGATCCATTTAGAGAGAGAATTACTGAAATAATGAGTGAGATTCAAACCTATTGCCAGCTCT  
ATCCAAAATCTGAGTTTGGAACTCAGCCATATGAACAGTGGGTGATTAGAGAAGAGAAAAA  
AGCTGCAAAAGAAGAAAAACGCAAGGAACGTGTCTGTGCAGAACACCTGAAGAAATACAAT  
GATGCTCTCCAGATAAATGATACCATCCGAATGGTGGATGCGTATAATCACCTAAATAACTT  
TTATAAGGAGGAGAAAAAGTAAGAAGACAGTAACGAGTGATGATGATGATGAACCAGCAGTA  
TCAAAACAGGATGAAACAGACGAATTTCTAATAGTTTTATTTCAAGCAAAAAAGAAACAGCT  
GAAAGAGTTGGCTAGAAAGCCAGAATATGAAAACGAGAAGCTAATACAGTTGCGAAACACT  
TTAATGGAGGAGTTCACGAAGACGGAAGAACCTAGAGGAATTATTTTCACAAAGACTCGGC  
TAAGCGCCTTTGCTCTATTCCAGTGGATTAAGGACAACCCAAAATTTGAAGAAGTGGGAAT  
TAAGGCCCATTTATCTTATTGGTGTCTGGACATAACAGTGAAATTAAACCCATGACTCAGAATG  
AGCAAAGGGAAGTCATTGATAAATTCCGAGGTGGAAGTGTAATTTACTTATTGCCACTACT  
GTAGCTGAGGAAGGCCTAGACATCAAAGAGTGTAACATCGTTATTCGCTATGGCCTCGTCA  
CCAATGAAATTGCTATGCTGCAGGCTCGCGGTGAGCTCGAGCTGATGAGAGCACCTATG  
CACTTGTGGCTTCAAGTGTCTCAGGAGCTGTTGAACGTGAAGATGTTAATATTTCCGTGA  
GAAAATGATGTATAAGGCCATTGAGCGTGTCCAGAACATGCCACAGGAAGAGTATTTAGAT  
AAGATTGAGAATTTGCAGTTGCAAAGTATCGTGGA AAAACAAATGAAGGCAAAGAGAGATC  
AGCAGAAGACATACAAGAAAACCCCTTCATTAGTAACTTTCTATGCAAAAATTGCCACAAG  
CCGGTATGTTCTGGAGAAGACATACAAGTTATTGAAAACATGCATCATGTCAGTGTGAAAAA  
AGACTTCCAACTCTTTACCATACAAAAGAAAATAAGACACTGCAAGATAAGCATGCCGATT  
ACCAGACAAATGGGGAAATTATATGTAAGATTGTGGACAAGCTTGGGGAAATATGATGGT  
TCACCGAGGTCTTGACCTGCCTTGTCTAAAGATTAGAAATTTTGTGGTTGTGTTTGAAGACA  
AGAAAACAACAAAGCACATTTTTAAGAAATGGGGAGAACTGCCCATCAAGTTCCTAGCCT  
TGATTATGCAGCTCATTGTCCTTCAAGTGATGAAGAT

>alca\_torda-charadriiformes-mda5

ATGGCAGAGGAGTGCCGAGACGAGCGGTTCTCTACATGATCTCCTGCTTCAGGCCGCGG  
CTGAAGCAGTTCATCCGGGTGCAGCCGGTGTCTGGACCGGCTTCCTCGCTGAGCCCGGA  
GGACAGGGAGAGGGTGCAGGACGGCCGCGTGCAGCGCGGCGAGGTGGAGGGGGCGGA  
GGAGCTGCTGCGGGCCGTGGAGCGGGGTCCCCGCGGCTGCGGCTGGTTCCACGAGTTC  
CTGCAGGCGCTGGAGCAGGGCGGCTGCAGGCTGGCTGCCTGCTACGTGAACCCAGCCT

CAGCCAGCTGCCCTCGCCGGCCGAGGAGGCCGACCATGACCTCTGCGTGCACTTGGTGCC  
AGCTGCTCCACAGCACACTGGTGGATAAGATGCAGACCGTGCAGGTGGCTGAGAAGTGCC  
TGCAGATGGGCATCTTCCAGGATGACGACCTGGATCGGATCCACACTGTTACTGACAATC  
GTGGGAACAGAGATGGTGCAAGGGAGCTATTGAGCAGAATAGTGCAGAAGAAAGACTGGT  
TCTCTCCTTTTTTGGTTGCTTTGCGTGAAACCCAACATGGAGACCTTGCAGATGATTTAAGC  
GGAAATACAGAAGAAACAGAGAATAGACAAAATGGGATGAAGAACAGTACAAATGAAGAAA  
CAGAAGTTACAAGCCAACCAGGATATGCTGTAGCAGAGGATTTGAAACAGCAAGAAAATGC  
GAATGGTAGTTTTTGGCAGTGAGAACAGTGTATCGGAAACATCTATTGGAAAGAATTCTCTA  
GTTCCCGAGTCAGATGTCTCCATAGGAGATGGAAGTGTCAGTAACTTGAATGAAAACCTGA  
GACAGAGCTGCACAACCAGTGATTCAGAGGAAGATGAAGGGGAGAGCAGAGTTTACCTG  
AGCCAGATCTGATCCTGAGAGATTACCAGATGGAAGTTGCAAAGCCAGCACTGAACGGGG  
AGAATATCATAATATGTCTGCCTACAGGCAGTGGTAAAACCAGAGTGGCTGTTTACATTACC  
AAAGATCACTTGGATAAGAAGAAAAGAGCATCTGAGCCTGGAAAAGTTATAGTACTTGTTAA  
TAAGGTACCGTTGGTAGAACAGCATTTACGAAAGGAGTTTAATCCATTCTGAAGCGTTGG  
TATCAGGTTATTGGTTTAAAGTGGTGATTCTCAGCTGAAAATCTCATTTCCTGAAGCGTTGG  
AAGAAATGATGTCATCATCAGTACAGCACAGATCCTTGAGAATTCAGTGTAAATGCAGCCA  
AAGAAGATGAAGAAGGTGTCCACTTATCAGATTTTTCACTCATCATTATCGATGAATGTCAT  
CACACACAAAAGGAAGGTGTCTACAACAATATAATGCGACGTTACCTAAAAGAAAAGAGGA  
AGAACAGGAAGCTGGCAAAGGAAAACAAACCACTGATCCACAGCCTCAGATTCTGGGAC  
TTACAGCCTCACCTGGTGTAGGAGGTGCAACATCCAACCTCAAAAGCTGAAGAACATATTCT  
GAAAATCTGTGCCAATCTTGACGCACGTAGAATCATGACTGTTAAAGAGCATGCCTCCCAA  
CTGAAGAACCAGGTGAAGGAACCATATAAGAAGACTGTGATTGCAGATGACAAAAGAAGG  
GATCCATTTAGAGAGAGAATTACTGAAATCATGAGTGAGATTCAAACTATTGCCAGCTCTA  
TCCAAAATCTGAGTTTGGAACCTCAGCCATATGAACAGTGGGTGATTAGAGAAGAGAAAAAA  
GCTGCAAAAGAAGAAAAACGCAAGGAACGTGTCTGTGCAGAACACTTGAAGAAATACAATG  
ATGCTCTCCAGATAAATGACACCATCCGAATGGTGGATGCGTACAATCACCTAAATAACTTT  
TATAAGGAGGAGAAAAAGTAAGAAGACAGTAACGAGTGATGATGATGATGAACCAGCAGTAT  
CAAAACAGGATGAAACAGATGAATTTCTAATAGGTTTATTTTCATGCAAAAAAGAAACAGCTG  
AAAGAGTTGGCTAGAAAGCCAGAATATGAAAATGAGAAGCTAGTACAATTGCGAAACACTT  
TAATGGAGGAGTTCACGAAGACGGAAGAACCTAGAGGAATTATTTTCACAAAGACTCGGCT  
AAGTGCCTTTGCTCTATTCCAGTGGATTAAGGACAACCCAAAATTTGAAGAAGTGGGAATTA  
AGGCCCATTTATCTTATTGGTGCTGGACATAACAGTGAAATTAACCCATGACTCAGAATGA  
GCAAAGGGAAGTCATTGATAAATTCCGAGGTGGAAGTGTAATTTACTTATTGCTACTACTG  
TAGCTGAGGAAGGCCTAGACATCAAAGAGTGTAACATCGTTATTCGCTATGGCCTCGTCAC  
CAATGAAATTGCTATGCTGCAGGCTCGCGGTGAGCTCGAGCTGATGAGAGCACCTATGC  
ACTTGTGGCTTCGAGTGCCTCAGGAGCTGTTGAACGTGAAGATGTTAATATTTTCCGTGAG  
AAAATGATGTATAAGGCCATTGAGCGTGTCCAGAACATGCCACAGGAAGAGTATTTAGAGA  
AGATTCAGAATTTGCAGTTGCAAAGCATCGTGGA AAAACAAATGAAGGCAAAGAGAGATCA  
GCAGAAGACATACAAGAAAACCCCTTCATTAGTAACTTTCCTATGCAAAAATTGCCACAAGC  
CGGTATGTTCTGGAGAAGACATACAAGTTATTGAAAACATGCATCATGTCAGTGTGCAAAAA  
GACTTCCAACTCTTTACCATACAAAAGAAAATAAGACACTGCAAGATAAGCATGCCGATTA  
CCAGACAAATGGGGAAATTATATGTAAAGATTGTGGACAAGCTTGGGGAAATATGATGGTT  
CACCGAGGTCTTGATCTGCCTTGTCTAAAGATTAGAAATTTTGTGGTTGTGTTTGAAGACAA  
GAAAACAACAAAGCACATTTTTTAAGAAATGGGGAGAACTGCCCATCAGGTTCCCTAGTCTT

GATTATGCAGCTCATTGTCCTTCAAGTGATGAAGAT

>uria\_lomvia-charadriiformes-md5

ATGGCAGAGGGGTGCCGAGACGAGCGGTTCTCTACATGATCTCCTGCTTCAGGCCGCG  
GCTGAAGCAGTTCATCCGGGTGCAGCCGGTGCTGGACCGGCTTCCCTCGCTGAGCCCGG  
AGGACAGGGAGAGGGTGCGGGCGGCCGCCGTGCAGCGCGGCGAGGTGGAGGGGGCGG  
AGGAGCTGCTGCGGGCCGTGGAGCGGGGTCCCCGCGGCTGCGGCTGGTTCCACGAGTT  
CCTGCAGGCGCTGGAGCAGGGCGGCTGCGGGCTGGCTGCCTGCTACGTGAACCCAGC  
CTCAGCCAGCTGCCCTCGCCGGCCGAGGAGGCCGACCATGACCTCTGCGTGCACTTGGT  
GCAGCTTCTCCACAGCACGCTGGTGGATAAGATGCAGACCGTGCAGGTGGCTGAGAAGTG  
CCTGCAGATGGGCATCTTCCAGGATGACGACCTGGATCGGATCCACACTGTTACTGACAAT  
CGTGGGAACAGAGATGGTGCAAGGGAGCTGTTGAGCAGAATAGTGCAGAAGAAAGACTG  
GTTCTCTCCTTTTTTGGTTGCTTTGCGTGAAACCCAACATGGAGACCTTGCAGATGATTTAA  
GTGGAAATACAGGAGAAACAGAGAATAGACAAAATGGGATGAAGAACAGTACAAACGAAG  
AAACAGAAGTTACAAGCCAACCAGGATATGCTGTAGCAGAGGATTTGAAACAGCAAGAAAA  
TGTGAATGGTAGTTTTAGCAGTGAGAACAGTGTATCGGAAACATCTATTGAAAGAATTCT  
CTAGTTCCCGAGTCAGATGTCTCCATAGGAGATGGAAGTGTGAGTAAGTTGAATGAAAACC  
TGGGACAGAGCTGCACAACCAAGTATTGAGAGGAAGATGAAGGGGAGAGCAGAGTTTCAC  
CTGAGCCAGATCTGATCCTGAGAGATTACCAGATGGAAGTTGCAAAGCCAGCACTGAATG  
GGGAGAATATCATAATATGTCTGCCTACAGGCAGTGGTAAAACCAGAGTGGCTGTTTACAT  
TACCAAAGATCACTTGGATAAGAAGAAAAGAGCATCTGAGCCTGGAAGTTATAGTACTT  
GTTAATAAGGTACCGTTGGTAGAACAGCATTTACGAAAGGAGTTTAATCCATTCTGAAGC  
GTTGGTATCAGGTTATTGGTTTAAGTGGTGATTCTCAGCTGAAAATCTCATTTCCTGAAGTT  
GTCAGAAGAAATGACGTCATCATCAGTACAGCACAGATCCTTGAGAATTCAGTTAAATG  
CAGCCAAAGAAGATGAAGAAGGTGTCCACTTATCAGATTTTTCACTCATCATTATCGATGAA  
TGTCATCACACACAAAAGGAAGGTGTCTACAACAATATAATGCGACGTTACCTAAAAGAAAA  
GAGGAAGAACAGGAAGCTGGCAAAGGAAAACAAACCACTGATCCACAGCCGCAGATTCT  
GGGACTTACAGCCTCACCTGGTGTAGGAGGTGCAACATCCAACCTCAAAGCTGAAGAACA  
TATTCTGAAAATCTGTGCCAATCTTGACGCACGTAGAATCATGACTGTAAAGAGCATGCCT  
CCCAACTGAAGAACCAGGTGAAGGAACCATATAAGAAGACTGTGATTGCAGATGACAAAAG  
AAGGGATCCATTTAGAGAGAGAATTACTGAAATCATGAGTGAGATTCAAACTATTGCCAG  
CTCTATCCAAAATCTGAGTTTGGAAGTCAAGCATATGAACAATGGGTGATTAGAGAAGAGA  
AAAAAGCTGCAAAAGAAGAAAAACGCAAGGAACGTGTCTGTGCAGAACACTTGAAGAAATA  
CAATGATGCTCTCCAGATAAATGACACCATCCGAATGGTGGATGCGTACAATCACCTAAAT  
AACTTTTATAAGGAGGAGAAAAAGTAAGAAGACAGTAACGAGTGATGATGATGAACCAG  
CAGTATCAAAACAGGATGAAACAGATGAATTTCTAATGGGTTTATTTTCATGCAAAAAAGAAA  
CAGCTGAAAGAGTTGGCTAGAAAGCCAGAATATGAAAATGAGAAGCTAGTACAGTTGCGAA  
ACACTTTAATGGAGGAGTTCACGAAGACGGAAGAACCTAGAGGAATTATTTTCACAAAGAC  
TCGGCTAAGTGCCCTTTGCTCTATTCCAGTGGATTAAGGACAACCCAAAATTTGAAGAAGTG  
GGAATTAAGGCCCATTTATCTTATTGGTGCTGGACATAACAGTGAAATTAACCCATGACTCA  
GAATGAGCAAAGGGAAGTCATTGATAAATCCGAGGTGGAAGTGTAATTTACTTATTGCTA  
CTACTGTAGCTGAGGAAGGCCTAGACATCAAAGAGTGTAACATCGTTATTCGCTATGGCCT  
CGTCACCAATGAAATTGCTATGCTGCAGGCTCGCGGTGAGCTCGAGCTGATGAGAGCAC  
CTATGCACTTGTGGCTTCGAGTGCCTCAGGAGCTGTTGAACGTGAAGATGTTAATATTTTC  
CGTGAGAAAATGATGTATAAGGCCATTGAGCGTGTCCAGAACATGCCACAGGAAGAGTATT

TAGAGAAGATTTCAGAATTTGCAGTTGCAAAGTATCGTGGA AAAACAAATGAAGGCAAAGAG  
AGATCAGCAGAAGACATACAAGAAAACCCCTTCATTAGTAACTTTCTATGCAAAAATTGCC  
ACAAGCCGGTATGTTCTGGAGAAGACATACAAGTTATTGAAAACATGCATCATGTCAGTGT  
GCAAAAAGACTTCCAAACTCTTTACCATACAAAAGAAAATAAGACACTGCAAGATAAGCATG  
CCGATTACCAGACAAATGGGGAAATTATATGTAAAGATTGTGGACAAGCTTGGGGAAATAT  
GATGGTTCACCGAGGTCTTGATCTGCCTTGTCTGAAGATTAGAAATTTTGTGGTTGTGTTTG  
AAGACAAGAAAACAACAAAGCACATTTTTAAGAAATGGGGAGAACTGCCCATCAGGTTCCC  
TAGTCTTGATTATGCAGCTCATTGTCCTTCAAGTGATGAAGAT

>scolopax\_mira-charadriiformes-md5

ATGGCAGAGGATTGCCGAGACGAGCGGTTCTCTACATGATCTCTTGCTTCAGGCCGCGG  
CTGAAGCGTTTCATCCAGGTGCAGCCGGTGCTGGACCGGCTTCCCTCGCTGAGCGCGGA  
GGAGAGGGAGAAGGTGCGGGCAGCCGCCAGCAGCGCGGTGAGGTGGAGGGGGCGGA  
GGAGCTGCTGCGGGCCGTGGAGCGGGGTCCCCGCGGATGCGGCTGGTTCCACGAGTTTT  
TGCAGGCTCTGGAGTACGGCGGGCTGCAGCCTGGCTGCCTGCTACGTGAACCCAGCCTC  
AGCCTGTTGCCCTCGCCGGCTGAGGAGGCCGACCATGATCTCTGTGTGTATTTAGTGCAG  
CTGCTCCACGGCACACTGGTGGATAAAATGATGCCCAGGCAGGTGGCTGAGAAGTGCCTG  
CAGATGGGCATCTTTCAGGACGACGACCTGGATCGGATCTGCACTGTTACTGACAATCGT  
GGGAACAGAGACGGTGCAAGGGAACCTATTGAGCAGAATAGTGCAAAGAAAGATTGGTTC  
TCTCCTTTTTTGGTTGCTTTGCGTGAAACACAACATGGAGACCTTGCAGATGATTTAAGTGG  
AATTACAGGAGGAACAGATACTAGACAAAATGGGATGAACAAT---  
ACAAATGAAGAAACAGAAGTTGCAAGCCAACCAGGATATGCTGCAGTAGAGGATTTGAAAC  
AGCAAGAAAATGTGAATGATGGTTTCAGCAATGAGAACACTGCATTGGAAACATCTATGGG  
AAATAATTCTGTGATTCCAGAGTCAGATGTCTCCATAGGAGATGCAAGTGTGAGTAACTTCA  
ATGAAAACCTGGGACAGAGCTGTTCAACCAAGTGATTGAGATGAAGATGAAGTGGAGAGCC  
AAGTTTCACCTGAGCCAGATCTGACCCTGAGAGACTACCAGATGGAAGTTGCAAAGCCAG  
CACTGAATGGGGAGAATATCATAATATGTCTGCCTACAGGCAGTGGTAAAACCAGAGTGGC  
TGTTTACATTACCAAAGATCACTTGGATAAGAAGAAGAGAGCATCAGAGCCTGGAAAAGTT  
ATAGTACTTGTTAATAAGGTACCATTGGTAGAACAGCATTTACGAAAGGAGTTTAGTCCATT  
CCTGAAGCGTTGGTATCGCGTTACTGGTTTAAAGTGGTGATTCTCAGCTGAAGATCTCATT  
CCTGAAGTTGTCAGAAGAAATGATGTCATCATCAGTACAGCACAGATACTTGAGAATTCAT  
GTTAAGTGCAGCTGAAGATGATGAAGAAGGTGTCCACTTATCAGATTTTTCACTCATCATTA  
TTGATGAGTGTGTCATCACACACAGAAGGAAGCTGTCTACAACAATATAATGCGACGTTACTTA  
AAAGAAAAGAGGAAGAACAGGAAGCTGGCAAAAGAAAACAAACCACTGATCCCACAGCCT  
CAGATTCTGGGACTTACAGCCTCACCTGGTGTAGGAGGTGCAAAATCTAACTCAAAAGCTG  
AAGAACATATTCTGAAAATCTGTGCCAATCTTGACGCGCATAGAATCATGACTGTTAAAGAA  
CATGCTTCCCAGTTGAAGAATCAGGTGAAGGAACCATATAAGAAGACTGTGATTGCAGATG  
ACAACAGAAGGGATCCATTTAGAGAGAGAATTACTGAGATCATGAGAGAGATTGAGAACTA  
TTGCCAGTTCCATCCAAAATCTGAGTTTGGAACTCAGCCATATGAACAATGGGTGATTAGA  
GAAGAGAAAAAGCTGCAAAAGAAGTAAACGCAAGGAACGTGTCTGTGCAGAACACTTGA  
AGAAATACAATGATGCTCTCCAGATAAATGACACCATCCGAATGGTGGATGCGTACAATCA  
CCTAAATAACTTTTTACAAGGAGGAGAAAAGTAAGAAGACAGTAAGGAGTGATGATGATGAT  
GAACCAACAGTATCAAAACAGGATGAAACAGATGAATTTCTAATAGGTTTATTTTCATGCAA  
AAAGAAACAGCTGAAAGAGTTGGCTAAAAAGCCAGAATATGAAAACGAGAAGCTAATACAG  
TTGCGAAACACTTTAATGGAGGAGTTCACGAAGACGGAAGAGCCTAGAGGAATTATTTTCA

CAAAGACTCGGCTAAGTGCCTTTGCTCTTTTCCAGTGGATTAAGGATAACTCAAAATTTGAA  
GAAGTGGGAATTAAGGCCATTACCTTATTGGTGCTGGACACAACAGTGAAATTAAGCCCA  
TGACTCAGAATGAGCAGAGGGAAGTCATTGATAAGTTCCGAGGTGGAAGTATAAATTTACT  
TATTGCTACTACTGTAGCCGAGGAAGGCCTAGACATCAAAGAGTGTAACATCGTTATTCGC  
TATGGCCTCGTCACCAATGAAATTGCTATGCTGCAGGCTCGCGGTGAGCTCGAGCTGAT  
GAGAGCACCTACGCACTTGTGGCATCGAGTGCCTCAGGAGCTGTTGAACGTGAAGATGTT  
AATATTTTCCGTGAGAAAATGATGTATAAGGCCATTTCAGCGTGTCCAGAACATGCCACAGA  
AAGACTATTTAAATAAGATTGAGAATTTGCAGTTGCAAAGTATAGTGGAAAAACAAATGAAG  
GCAAAGAGAGATCAGCACAAGACATACAACAAAAATCCTTCACTAGTAACATTCCTATGCAA  
AAATTGCCACAAGCTGGTATGTTCTGGAGAAGACATACAAGTTATTGAAAACATGCATCATG  
TCAGTGTGAAAAAGGACTTCCAAAGTCTTTACCAAACAAAAGAAAATAAGACACTGCAAGAC  
AAGCATGCCGATTACCAGACAAATGGGGAAATTATATGTAAACAATGTGGACAAGCTTGGG  
GAAATATGATGGTTCACCGAGGTCTTGACCTGCCTTGTCTAAAAATTAGAAATTTTGTGGTT  
GTGTTTGAAGACAAGAAAACAACAAAGCACATTTTAAAGAAATGGGGAGAACTGCCCATCA  
GGTCCCTAGTCTTGATTATGCAGCTCATTGTCCTTCAAGTGATGAAGAT

>calidris\_pugnax-charadriiformes-mda5

ATGGCTGAGGAGTGCCGAGACGAGCGGTTCTCTACATGATCTCCTGCTTCAGGCCGCGG  
CTGAAGCAGGTCATCCGTGTGCAGCCGGTGCTGGACCTGCTCCCCTCGCTGAGCGCGGA  
GGAGAGGGGAGAAGGTGCGGGCGGCCGCGGAGCGGCGCGGTGAGGTGGAGGGGGCGGA  
GGAGCTGCTGCGGGCCGTGGAGCGGGGTCCCCGCGGCTGCGGATGGTTCCACGAGTTC  
CTGCAGGCGCTGGAGAACGGCGGCTGCAGCCTGGCAGCCTGCTACCTCAACCCCAGCCT  
CAGCCTCCTGCCCTCGCCGCGGAGGAGGCCGACCACGACCTCTGCGTGCATTTAGTGC  
AGCTGCTCCACGGCACACTGGTGGATAAAATGCTGCCCAGGCCGGTGGCTGAGAAGTGC  
CTAGAGATGGGCATTTTCCAGGAGGACGACCTGGATCGGATTCATACTGTTACTGACAATC  
GTGGGAACAGAGATGGTGCAAGGGAAGTGTGAGCAGAATAGTGCAGAAGAAAGATTGGT  
TCTCTCCTTTTTTGGTTGCTTTGCGTGAAACCGAACATGGAACCTTGACAGATGATTTAAAT  
GGAATTACAGGAGGAACAGAGAATAGACAAAATGGGATGAACAAT---

ACAAATGAAGAAACAGAAGTTACAAGCCAACCAGGACATGCCGCAGTGGAGGATTTGAAA  
CAGCAAGAAAATGTGAATGATGGTTTCAGCAGTGAGAACACTGCATTGAAACATCTATTG  
GAAACAATTCTGTAGTTCCAGAGTCAGATGTCTCCATAGGAGATGCAAGTGCCAGTAACTT  
GAATGAAAACCTGGGACAGAGCTGTACAACAGTGATTGAGATGAAGATGAAGCGGAGAG  
CAGAGTTTCACCTGAGCCAGAACTGACCCTGAGAGATTACCAGATGGAAGTTGCAAAGCC  
AGCCCTGAATGGGGAGAATATCATAATATGTCTGCCTACAGGCAGTGGTAAAACCAGAGTG  
GCTGTTTACATTACCAAAGATCACTTGGATAAGAAGAGAAGAGCATCAGAGCCTGGAAAAG  
TTATAGTACTTGTTAATAAGGTACCGTTGGTAGAACAGCATTTACGAAAGGAGTTTGTCCA  
TTCCTGAAGCGTTGGTATCGGGTTATTGGTTTAAAGTGGTGATTCTCAGCTGAAAATCTCATT  
TCCTGAAGTTGTCAGAAGAAATGATGTCATCATCAGTACAGCACAGATCCTTGAGAATTCAC  
TGTTAAATTCAGGCCGAAGATGATGAAGAAGGTGTCCACTTATCAGATTTTTTCACTCATCATT  
ATTGATGAGTGTCATCACACGCAAAAGGAAGCTGTCTACAACAATATAATGCGACATTACTT  
GAAAGAAAAGAGGAAGAACAGGAACTGGCAAAAGAAAACAAACCACTGATCCACAGCC  
TCAGATCCTGGGACTTACAGCCTCACCTGGTGTAGGAGGTGCAAAATCTAACACAAAAGCT  
GAAGAACATATTCTGAAAATCTGTGCCAATCTTGACGCGCATAGAATCATGACTGTTAAAGA  
ACATGCTTCCCAGTTGAAGAATCAGGTGAAAGAACCATATAAGAAGACTGTGATTGCAGAT  
GACAACAGAAGGGATCCATTTAGAGAGAGAATTACTGAGATCATGAGAGAGATTGAGAACT



ATTGCCAGCTCCATCCAAAATCTGAGTTTGGAACCTCAGCCATATGAACAGTGGGTGATTAG  
AGAAGAGAAAAAGCTGCAAAAGAAGAAAAACGCAAGGAGCGTGTCTGTGCAGAACACTT  
GAAGAAATACAATGACGCTCTCCAGATAAATGACACCATCCGAATGGTGGATGCATACAAT  
CACCTAAATAATTTTTATAAGGAGGAGAAAAAGTAAGAAGACAGTAAGGAGTGATGATGATG  
ATGAACCAGCAGTATCAAAACAGGATGAAACAGATGAATTTCTAATAGGTTTATTTTCATGCA  
AAAAAGAAACAGCTGAAAGAGTTGGCTAAAAAGCCAGAATATGAAAACGAGAAGCTAATAC  
AGTTGCGAAACACTTTAATGGAGGAGTTCACAAAGACGGAAGAACCAAGAGGAATTATCTT  
CACAAAGACTCGGCTAAGTGCCCTTTGCTCTTTTCCAGTGGATTAAGGATAACCCAAAATTTG  
AAGAAGTGGGAATTAAGGCCCATTAACCTTATTGGTGCTGGACATAACAGTGAAAGTAAACC  
CATGACTCAGAATGAGCAGCGGGAAGTCATTGATAAGTTCCGAGGTGGAAGTGTAATTTA  
CTTATTGCTACTACTGTAGCCGAGGAAGGCCTAGACATCAAAGAGTGTAACATCGTTATTC  
GCTATGGCCTCGTCACCAATGAAATTGCTATGCTGCAGGCTCGTGGTTCGAGCTCGATCTG  
ATGAGAGCACCTACGCGCTTGTGGCTTCAAGTGCCTCAGGAGCTGTTGAACGTGAAGATG  
TTAATATTTTCCGTGAGAAAATGATGTATAAGGCCATTGACGCGTGTCCAGGACATGCCGCA  
GAAAGACTATTTAAATAAGATTGAGAATTTGCAGTTGCAAAGTATAGTGAAAAACAAATGA  
AGGCAAAGAGAGATCAGCACAAAGACATACAAGAAAAATCCTTCACTAGTAACATTCCTATG  
CAAAAATTGCCACAAGCTGGTATGTTCTGGAGAAGACATACAGGTTATTGAAAACATGCAT  
CATGTGAGTGTAAGGAAAGACTTCCAAAGTCTTTACCAAACAATAGAAAATAAGACACTGCA  
AGACAAGCATGCCGATTACCAGACAAATGGGGAAATTATATGTAAACAATGTGGACAAGCT  
TGGGGAAATATGATGGTTCACCGAGGTCTTGACCTGCCTTGTCTAAAGATTAGAAATTTTGT  
GGTTGTGTTTGAAGACAAGAAAACAACAAAGCACATTTTTTAAGAAATGGGGAGAACTGCCC  
ATCAAGTTCCCTAGTCTTGATTATGCAGCTCATTGTCCTTCGAGCGATGAAGAT

>limosa\_lapponica-charadriiformes-mdaf5

ATGGCGGAGGAGTGCCGAGACGAGCGGTTCTCTACATGATCTCCTGCTTCAGGCCGCG  
GCTGAAGCAGTTCATCCGGGTGCAGCCGGTGCTGGACCGGCTTCCCTCGCTGAGCGCGG  
AGGAGAGGGAGAAGGTGCGGACGGCCGCCCTGCAGCGCGGTGAGGTGGAGGGGGCCG  
AAGAGCTGCTGCGGGCCGTGGAGCGGGGTCCCCGCGGCTGCGGCTGGTTCCACGAGTTT  
TTGCAGGCGCTGGAGCACGGCGGCTGCGGGCTGGCTGCCTGCTACATGAACCCAGCCT  
CAGCCTGCTGCCCTCGCCGGCCGAGGAGGCCGACCACGACCTCTGTGTGCACTTAGTGC  
AGCTGCTCCACAGCACACTGGTGAATAAAATGCTGCCCAGGCAGGTGGCTGAGAAGTGCC  
TACAGATGGGCATCTTCCAGGATGACGACCTGGATCGGATCCCACTGTTACTGACAATCG  
TGGGAACAGAGATGGTGCAAGGGAAGTATTGAGCAGAATAGTGCAAGAAGAAAGATTGGTT  
CTCTCCTTTTTTGGTTGCTTTGCGTGAAACCCAACACGGAGACCTTGCAATGATTTAAGTG  
GAATTACAGGAGGAACAGAGAATAGACAAAATGGGATGAACAAT---  
ACAAATGAAGAAACAGAAGTTACAAGCCAACCAGGAGATGCCGCACTGGAGGATTTGAAA  
CAGCAAGAAAATGTGAATGATGGTTTCAGCAGTGAGAACATTGTATTGGAAACATCTATTG  
GAAATAATTCTGTAGTTCCAGAGTCAGATGTCTCCATAGGAGATGCAAGTGTCAGTAACCT  
GAATGAAAACCTGGGACAGAGCTGTACAACCAGTGATTCAGATGAAGATGAAGTGGAGAG  
CAGAGTTTCACCTGAGCCAGATCTGACCCTGAGAGACTACCAGATGGAAGTTGCAAAGCC  
AGCACTGAATGGGGAGAATATCATAATATGTCTGCCTACAGGCAGTGGTAAAACCAGAGTG  
GCTGTTTACATTACCAAAGATCACTTGGATAAGAAGAAAAGAGCATCAGAGCCTGGAAAAG  
TTATAGTACTTGTTAATAAGGTACCGTTGGTAGAACAGCATTTACGAAAGGAGTTTAGTCCA  
TTCCTGAAGCGTTGGTATCAGGTTATTGGTTTAAGTGGTGATTCTCAGCTGAAAATCTCATT  
TCCTGAAGTTGTCAGAAGAAATGATGTCATCATCAGTACAGCACAGATCCTTGAGAATTCAC

TGTTAAATGCAGCTGAAGATGATGAAGAAGGTGTCCACTTATCAGATTTTTCTACTCATCATT  
ATTGATGAGTGTTCATCACACACAAAAGGAAGCTGTCTACAACAATATAATGCGACGTTACTT  
AAAAGAGAAGAGGAAGAACAGGAAGCTGGCAAAAAGAAAACAAACCACTGATCCACAGCC  
TCAGATTCTGGGACTTACAGCCTCACCTGGTGTAGGAGGTGCAACATCTAACTCAAAAGCT  
GAAGAACATATTCTGAAAATCTGTGCCAATCTTGACGCGTGTAGAATCATGACTGTAAAGA  
ACATGCTTCCCAGTTGAAGAATCAGGTGAAGGAACCATATAAGAAGACTGTGATTGCAGAT  
GACAAAAGAAGGGATCCATTTAGAGAGAGAATTACTGAGATAATGAGAGAGATTGAGAACT  
ATTGCCAGCTCCATCCAAAATCTGAGTTCGGAACCTCAGCCATATGAACAGTGGGTGATTAG  
AGAAGAGAAAAAAGCTGCAAAAGAAGAAAAACGCAAGGAACGCGTCTGTGCAGAACACTT  
GAAGAAATACAATGATGCTCTCCAGATAAATGACACCATCCGAATGGTGGATGCATACAAT  
CACCTAAATAACTTTTATAAGGAGGAGAAAAAGTAAGAAGACAGTAACGAGTGATGATGATG  
ATGAACCAGCAGTATCAAAACAGGATGAAACAGATGAATTTCTAATAGGTTTATTTTCATGCA  
AAAAAGAAACAGCTGAAAGAGTTGGCTAAAAAGCCAGAATATGAAAACGAGAAGCTAATAC  
AGTTGCGAAACACTTTAATGGAGGAGTTCACGAAGACGGAAGAACCTAGAGGAATTATTTT  
CACAAAGACTCGGCTAAGTGCCTTTGCTCTTTTCCAGTGGATTAAGGATAACCCAAAATTTG  
AAGAAGTGGGAATTAAGGCCATTATCTTATTGGTGTCTGGACATAACAGTGAAATTAACC  
CATGACTCAGAATGAGCAGAGGGAAGTCATTGATAAGTTCCGAGGTGGAAGTGTAATTTA  
CTTATTGCTACTACTGTAGCCGAGGAAGGCCTAGACATCAAAGAGTGTAACATCGTTATTC  
GCTATGGCCTCGTCACCAATGAAATTGCTATGCTGCAGGCTCGCGGTGAGCTCGAGCTG  
ATGAGAGCACCTACGCGCTTGTGGCTTCAAGCGCCTCAGGAGCTGTTGAACGTGAAGATG  
TTAATATTTTCCGTGAGAAAATGATGTATAAGGCCATTCAGCGTGTCCAGAACATGCCGCA  
GAAAGACTATTTAAATAAGATTGAGAATTTGCAGTTGCAGAGTATAGTGGAACAAATGA  
AGGCAAGAGAGATCAGCACAAAGACATACAAGAAAAATCCTTCACTAGTAACATTCCTATG  
CAAAAATTGCCACAAGCTGGTATGTTCTGGAGAAGACATACAAGTTATTGAAAACATGCATC  
ATGTCAGTGTGAAAAAAGACTTCCAAAGTCTTTACCAAACAAGAGAAAAATAAGACACTGCAA  
GACAAGCATGCCGATTACCAGACAAATGGGGAAATTATATGTAAACAATGTGGACAAGCTT  
GGGGAAATATGATGGTTCACCGAGGTCTTGACCTGCCTTGTCTAAAGATTAGAAATTTTGT  
GGTTGTGTTTGAAGACAAGAAAACAACAAAGCACATTTTAAAGAAATGGGGAGAACTGCCC  
ATCAGGTTCCCTAGCCTTGATTATGCAGCTCATTGTCTTCAAGTGATGAAGAT

>opisthocomus\_hoazin-opisthocomiformes-mda5

ATGGCAGAGCAGCCCCAGGACGAGCGCTTCCTCTACCTGATCTCCTGCTTCAGGCCGCGG  
CTGAAGCAGTTCATCCGGGTGCAGCCGGTGTCTGGACCGGCTTCCCTCGCTGAGCGCGGC  
GGACAGGGAGAAGGTGCGGGCGGCCACCCTGCAGCGGGGCGAGGTGGAGGGGGCGGA  
GGAGCTGCTGCGGGGCCGTGGAGCGGGGGCCCCGCGAGTGCGGCTGGTTCCACGAGTTC  
CTGCAGGCTCTGGAGCACGGCGGCTGCAGCCTGGCCGCCTGCTACGTGAACCCACAGCCT  
CAGCCAGCTGCCCTCGCCGGCTCAGGAGGCGGACCACGACCTCTGCGTGCACTTGGTGC  
AGCTGCTCCATAGCACGCTGGTGGACAGAATGCAGACCGTGCAGGTGGCCGAGAAGTGC  
CTGCAGATGGGCATCTTCCAGGACGAGGACCTGGATCGGATCCATGCTGTGACTGACAAT  
CGTGGGAACAGAGATGGTGCAAGGGAGCTATTGAGCAGAATAGTGCAAGAAGAAAGATTGG  
TTCTCTCCTTTTTTGAATTGCTCTGCGTGAAACCCAACATGGAGGCCTTGCAGATGATTTAAG  
TGGAATACAGGAGGAACAGAGAATACACAAAATGGAATGAAGAACAGTACAAAAGAAGAA  
ACAGAAGTTGCAAGCCAACCAGGATATGCTGTAGTGGAAGATTTGAAACAGCAAGAAAATG  
TGAATGATCATTTTCATCAGTGAGAACAGTGTATTGGAACATCTATT-----  
GTAGTTTCAGAGTCAGATGTCTCCATAGGAGATGGAAGTGTGAGTAACCTGAATGAAAACC

TGGGACAGAGCTGCACAACCAGTGATTGAGATGAAGTGGAGAGCAGAGCTTCAC  
CTGAGCCAGATCTGATCCTGAGAGATTACCAGATGGAAGTTGCAAAGCCAGCACTGAATG  
GGGAGAATATTATAATATGTCTCCCTACAGGCAGTGGTAAAACCAGAGTGGCTGTTTACAT  
TACCAAAGATCACTTGGATAAGAAGAAAAGAGCATCAGAGCCTGGAAAAGTTATAGTGCTT  
GTTAATAAGGTACCATTGGTAGAACAGCATTTACGAAAGGAGTTTAAATCCATTCTGAAGCG  
TTGGTATCAGGTCACTGGTTTAAGTGGTGATTCTCAGCTGAAAATCTCATTTCTGAAGTTG  
TCAGAAGAAATGATGTCATCATCAGTACAGCACAGATCCTGGAGAATTCAGTGTTAAATGCA  
GCCAAAGAAGATGAAGAAGGTGTCCACTTATCAGATTTTTCACTCATCATTATCGATGAATG  
TCATCACACTCAAAAGGAAGGTGTCTACAACAACATAATGCGACGTTACTTAAAAGAAAAGA  
TGAAGAACAGCAAGCTGGCAAAAGAAAACAAACCACTGATCCCACAGCCTCAGATTCTGG  
GACTTACAGCCTCACCTGGTGTAGGAGGTGCAACATCCTACTTAAAGCTGAGGAACATAT  
TTTGAAAATCTGTGCCAATCTTGATGCGTGTAGAATCATGACTGTTGAAGAGCACACCTCC  
CAACTGAAGAATCAGGTGAAGGAACCGTATAAGAAGACTGTGATTGCAGACGACAAAAGAA  
GGGATCCATTTAGAGAGAGGATTACTGAGATCATGACAGACATTCAAACTATTGCCAGCT  
CCATCCAAAATCTGAGTTTGGAAGTCAAGCATATGAACAGTGGGTGATTAGAGAAGAGAGA  
AGAGCTGCAAAAGAAGAAAAACGTAAGGAACGCGTCTGTGCAGAACACCTGAAGAAGTAC  
AATGATGCTCTCCAGATAAATGACACCATCCGAATGGTGGATGCGTACAATCACCTAAATA  
ACTTTTATAAGGAGGAGAAAAGTAAGAAGACAGTAAGGAGTGATGATGATGATGAGCCAGC  
AGCATCAAAACAGGATGAAACAGATGAGTTTCTAATAGGTTTATTTAATGCAAAAAAGAAAC  
AGCTGAAAGAGTTGGCTAGAAAGCCAGAATATGAAAATGAGAAGCTAATACAGTTGCGAAA  
TACTTTAATGGAGGAGTTCACGAAGACTGAGGAACCCAGAGGAATTATTTTCACAAAGACT  
CGGCTAAGTGCTTTGCTCTATTCCAGTGGATTAAGGATAACCCAAAATTTGAAGAAGTGG  
GAATTAAGGCCATTATCTTATCGGTGCTGGACATAACAGTGAAATGAAACCCATGACTCA  
GAATGAGCAAAGGGAAGTTATTGATAAATTCCGAGGTGGAAATGTAAATTTACTTATTGCTA  
CTACTGTAGCTGAGGAAGGCCTAGACATCAAAGAGTGTAACATCGTTATTCGCTACGGCCT  
CGTCACCAATGAAATTGCTATGGTGCAGGCTCGCGGTGAGCTCGAGCTGATGAGAGCAC  
CTATGCACTTGTGGCTTCCAGCGGCTCAGGAGCTGTTGAACGTGAAGATGTTAATATTTTC  
CGTGAGCAAATGATGTATAAGGCCATTACGCGTGTCCAGAGGATGCCGCAGGAAGAGTAT  
TTAAATAAGATTCAGGATTTCCAGTTGCAAAGTATAGTAGAAAAACAAATGAAGGCCAAAGAG  
AGATCAGCGCAAGACACACAAGAAAAATCCTTCACTAATAACATTCCTATGCAAAAATTGCC  
ACAAGCTGGTATGTTCTGGAGAAGACATACAAGTTATTGAAAACATGCATCATGTCAGTGT  
GAAAAAGGATTTCCAAAGTCTTTACCATAACAAGAGAAAATAAGACACTGCAAGATAAGCATG  
CCGATTACCAGACAAATGGGGAAATTATATGTAAAGATTGTGGACAAGCTTGGGGAAATAT  
GATGGTTCACCGAGGTCTTGACCTGCCTTGTCTAAAGATTAGAAATTTTGTGGTTGTGTTTG  
AAGACAAGAAAACAACAAAGCAAATTTTTAAGAAATGGGGAGAACTGCCCATCAGATTCCC  
TGGTTTTGATTATGCAGCTCATTGTCCTTCAAGTGATGAGGAT

>burhinus\_oediconemus-charadriiformes-mda5

ATGGCAGAGGAGTCCGGAGACGAGCGCTTCCTCTACCTGATCTCCTGCTTCAGGCCGCGG  
CTGAAGCAGTTCATCCGAGTGACAGCCGGTGCTGGACTTGCTTCCCTCTCTGAGCGCTGAG  
GAGCGGGAGAGGGTGCGGGCGGCCGCCCGGCAGCGGGGCGAGGTGGAGGGCGCAGAG  
GAGCTGCTGCGGGCCGTGGAGCGGGGACCCCGCGGGTGCGGCTGGTTCCACGAGTTCC  
TGCAGGCGCTGGAGAACGGCGGCTGCAGCCTGGCTGCCTGCTACGTGAACCCAGCCTC  
AGCCAGCTGCCCTCGCCGGCCGAGGAGGCCGACCATGACCTCTGCGTGCACTTGGTGCA  
GCTGCTCCACAGCACACTGGTGGACAAAATGCAGACCATGCAGGTGGCTGAGAAATGCCT

GCAGATGGGCATCTTCCAGGACGACGACCTGGATCGGATCCACACTGTTACTGACAATCG  
TGGGAACAGAGATGGTGCAAGGGAGCTATTGAGCAGAATAGTGCAGAAGAAAGATTGGTT  
CTCTCCTTTTTTGATTGCTTTGCGTGAAACCCAACATGGAGACCTTGCAGATGATTTAAGTG  
GAAATACAGGAGGAACAGAGAATAGAGAAAATGGGATTAAGAACAGTACAAACGAAGAAAC  
AGAAATTACAAGCCAACCAGGATATGCTGTAGTAGAGGATTTGAAACAGCAAGAAAATGCG  
AATGATAGTTTTAGCAGCGAGAACAGTGCATTGGAACTTCTGTTGGAAAGAATTCTGTAG  
TTTCAGAGTCAGATGTCTCCATAGGAGATGTAAGTGTGGTAACCTTGAATGAAAACCTGGG  
ACAGAGCTGCACAACCAGTGATTCAGATGAAGATGAAGTGCAGAGCAGAGCTTCACCTGA  
GCCAGATCTGATCCTGAGAGATTACCAGATGGAAGTTGCAAAGCCAGCACTGAATGGGGA  
GAATATCATAATATGTCTGCCTACAGGCAGTGGTAAAACCAAGAGTGGCTGTTTACATTACCA  
AAGATCACTTGGATAAGAAGAAAAGAGCATCAGAGCCTGGAAAAGTTATAGTACTTGTTAAT  
AAGGTACCGTTAGTAGAACAGCATTACGAAAGGAGTTTAATCCATTCCCTGAAGCGTTGGT  
ATCAGGTTATTGGTTTAAAGTGGTGATTCTCGGCTGAAAATCTCATTTCCCTGAAGTTGTCAGA  
AGAAATGACGTCATCATCAGCACAGCACAGATCCTTGAGAATTCAGTGTAAATGCAGCCG  
AAGAAGATGAAGAAGGTGTCCACTTATCAGATTTTTCACTCATCATTATCGATGAGTGTAT  
CACACTCAAAGGAAGGTGTCTACAACAATATAATGCGACGTTACTTAAAGAAAAGAGGA  
AGAACAGGAAGCTGGCAAAGAAAACAAACCACTGATCCCACAGCCTCAGATTCTGGGAC  
TTACAGCCTCACCTGGTGTAGGAGGTGCAACATCCAACCTCAAAGCTGAAGAACATATTCT  
GAAAATCTGTGCCAATCTTGATGCACGTAGAATCATGACTGTTGAAGAGCATGCCTCCCAA  
TTAAAGAATCAAGTGAAGGAACCGTATAAGAAGACTGTGATTGCAGATGACAAAAGAAAGG  
ATCCATTTAGAGAGAGAATTACTGAGATCATGAGAGACATTCAGAACTATTGCCAGCTCCAT  
CCAAAATCTGAGTTTGGAAGCTCAGCCCTACGAACAGTGGGTGATTAGAGAAGAGAAAAAG  
CTGCAAAGAAAGAAAAACGCAAGCAACGTGTCTGTGCAGAACACTTGAAAAATACAATGA  
TGCTCTCCAGATAAATGACACTATCCGAATGGTGGATGCGTACAATCACCTAAATAACTTTT  
ATAAGGAGGAGAAAAAGTAAGAAGACAGTAAGGAGTGATGATGATGATGAACCAGCAGTATC  
AAACAGGATGAAACAGATGAATTTCTAGTAGGTTTATTTTCATGCAAAAAAGAAACAGCTGA  
AAGAGTTGGCTAGAAAGCCAGAATATGAAAACGAGAAGCTAATACAGTTGCGAAACACTTT  
AATGGAGGAGTTCACGAAGACTGAAGAACCTAGAGGAATTATTTTCACAAAGACTCGCCTA  
AGTGCCCTTTGCTCTATTCCAGTGGATTAAGGATAACCCAAAATTTGAAGAAGTGGGAATTAA  
GGCCCATATTCTTATTGGTGCTGGACATAACAGTGAAATTAACCCCATGACTCAGAATGAG  
CAAAGGGAAGTCATTGATAAATTCCGAGGTGGAAGTGTAATTTACTTATTGCTACTACTGT  
AGCGGAGGAAGGCCTAGACATCAAAGAGTGTAACATCGTTATTCGCTATGGCCTTGTCACC  
AATGAAATTGCTATGGTGCAGGCTCGTGGTCGAGCTCGAGCTGATGAGAGCACCTATGCA  
CTTGTGGCTTCGAGTGTCTCAGGAGCTGTTGAACGTGAAGATGTTAATATTTTCCGTGAGA  
AAATGATGTATAAGGCCATTACGCGTGTCCAGAACATGCCACAGGAAGAGTATTTAAATAA  
GATTCAGAATTTGCAGTTGCAAAGTATAGTGAAAAACAAATGAAGGCAAAGAGAGATCAG  
CACAAGACATACAAGAAAAATCCTTCACTGCTAACATTCCCTATGCAAAAATTGCCACAAGCT  
GGTATGTTCTGGAGAAGACATACAAGTTATTGAAAACATGCATCATGTCAGTGTCAAAAAAG  
ACTTCCAAAGTCTTTACAATACAAGAGAAAATAAGACACTGCAAGATAAGCATGCCGATTAC  
CAGACAAATGGGGAAATTATATGTAAAGATTGTGGACAAGCTTGGGGAAATATGATGGTTC  
ACCGAGGTCTTGACCTGCCTTGTCTAAAGATTAGAAATTTTGTGGTTGTGTTTGAAGACAAG  
AAAACAACAAAGCACATTTTTAAGAAATGGGGAGAACTGCCCGTCAGGTTCCCTAGTTTTG  
ATTATGCAGCTCATTGTCCTTCAAGTGATGAAGAT

>charadrius\_alexandrinus-charadriiformes-mda5\_partial

ATGGCGGAGGAGTCCCGAGACGAGCGCTTCCTCTACATGATCTCCTGCTTCAGGCCGCGG  
CTGAAGCAGGTCATTCAGGTGCAGCCGGTGCTGGACCGGCTTCCCTCGCTGAGCGCGGA  
GGACCGGGAGAGGGTGCGGGCGGCCGCCCTGCAGCGGGGCGACGTGGATGGGGCGGA  
GGAGCTGCTGCGGGCCGTGGAGCGGGGGCCCCGCGGGTGCGGCTGTTCCACGAGTTC  
CTGCAGGCGCTGGAGCAGGGGGGCTGCAGCCTGGCTGCCTGCTATGTGAACCCACGCT  
CAACCAGCTGCCGTCGCCAGCCGAGGAGGCCGACCATGACCTCTGTGTGCACTTGGTGC  
AGCTGCTCCACAGCACACTGGTGGATAGAATGCAGACCATGCAGGTGGCTGAGAAGTGCC  
TGCAGATGGGCATCTTCCAGGATGACGACCTGGATCGGATCCACGCTGTTACTGACAATC  
ACGGGAACAGAGATGGTGCAAGGGAGCTACTGAGCAGAATAGTGCAGAAGAAAGACTGGT  
TCTCTCCTTTTTTGAAGTGCTTTGCGTGAAACCCAACATGGAGACCTTGCAGATGATTTAAGC  
GGAAATACAGAAGGAACAGAGAATAGACAAAATGGAATGAAAAACAGTACAAGTGAAGAAA  
CAGAAGTTACAAGCCAACCAGGATACGCTGTAGTGAAAGATTTGAAACAAGAAGAAAATGT  
GAACGATAGTTTCAGCAGTGAGAACAGTGTACTGGAACATCTATTGGAAGAATTCTGGA  
GTTTCAGAGTCAGATGTCTCCATAGAAGATGGAAGTGTTGGTAACTTGAATGAAAACCTGG  
GACAGAGCTGCACTACCAGTGATTCAGATGAAGATGAACTGGAGAGCAGAGCTTCGCCTG  
AGCCAGATCTGATCCTGAGAGATTACCAGATGGAAGTTGCAAAGCCAGCACTGAATGGGG  
AGAATATCATAATATGTCTGCCTACAGGCAGTGGTAAAACCAGAGTGGCTGTTTACATTACC  
AAAGATCACTTGGATAAGAAGAAAAGAGCATCAGAGCTTGGAAAAGTTATAGTACTTGTTAA  
TAAGGTACCATTGGTAGAACAGCATTTACGAAAGGAGTTTAATCCATTCTGAAGCGTTGG  
TATCAGGTTATTGGTTTAAAGTGGTGATTCTCGGCTGAAAATCTCATTTCTGAAGTTGTCAG  
AAGAAATGATGTCATCATCAGTACAGCACAGATCCTTGAGAATTCAGTGTTAAATGCAGCC  
GAAGAAGATGAAGAAGGTGTCCACTTATCAGNNNNNNNNNNNNNNNTTATCGATGAGTGT  
CATCACACTCAAAAGGAAGGTGTCTACAACAATATAATGCGACGTTACTTAAAAGAAAAGAG  
GAAGAACAGGAAGCTGGAAAAAGAAAACAAACCAGTGATCCCACAGCCTCAGATTCTGGG  
ACTTACAGCCTCACCTGGTGTAGGAGGTGCAAAATCCAACCTCAAAAGCTGAAGAACATATT  
CTGAAAATCTGTGCCAATCTTGATGCACGTAGAATCATGACTGTTGAAGAGCATGCCTCCC  
AATTGAAGAATCAGGTGAAGGAACCGTATAAGAAGACTGTGATTGCAGATGACAAAAGAAG  
GGATCCATTTAGAGAGAAAATTACTGAGATCATGAGAGACATTCAAACTATTGCCAACTCT  
ATCCAAAATCTGAGTTTGGAACTCAGCCATATGAACAGTGGGTGATTAGAGAAGAGAAAAA  
AGCTGCAAAAGAAGAAAAACGCAAGGAACGTGTCTGTGCAGAACACTTGAAGAAATACAAT  
GATGCTCTCCAGATAAATGACACCATCCGAACAGTGGATGCATACAATCACCTAAATAACTT  
TTATAAGGAGGAGAAAAAGTAAGAAGACAGTAAGGAGTGATGATGATGATGAACCAGCAGTA  
TCAAAACAGGATGAAACAGATGAATTTCTAATAGGTTTATTTTCATGCAAAGAAGAAACAGTT  
GAAAGAGTTGGCTAGAAAGCCAGAATATGAAAATGAGAAGCTAATACAGTTGCGAAACACT  
TTAATGGAGGAGTTCACGAAGACTGAAGAACCTAGAGGAATTATTTTACAAAGACTCGGC  
TAAGTGCCTTTGCTCTATTCCAGTGGATTAAGGATAACCCAAAATTTGAAGAAGTGGGAATT  
AAGGCCCATATCTTATTGGTGCTGGACATAACAGTGAAGTTAAACCCATGACTCAGAATG  
AGCAAAGGGAAGTCATTGATAAATTCCGAGGTGGAAGTGTAATTTACTTATTGCTACTACT  
GTAGCTGAGGAAGGCCTAGACATCAAAGAGTGTAACATCGTTATTCGCTATGGCCTCGTCA  
CCAATGAAATTGCTATGGTGCAGGCTCGCGGTCGAGCTCGAGCTGATGAGAGCACCTATG  
CACTTGTGGCTTCGAGTGTCTCAGGAGCTGTTGAACGTGAAGATGTTAATATTTTCCGTGA  
GAAAATGATGTATAAGGCCATTACGCGTGTCCAGAACATGCCGCAGGAAGAGTATTTAAAG  
AAGATTGAGAATTTGCAGTTGCAAAGTATAGTGGA AAAACAAATGAAGGCCAAGAGAGACC  
AGCACAAAACATACAAAAAAAATCCTTCACTAGTAACATTGCTATGCAAAAATTGCCACAAG

CTGGTATGTTCTGGAGAAGACATACAAGTTATTGAAAACATGCATCATGTCAGTGTGAAAAA  
AGACTTCCAACTCTTTACAATACAAGAGAAAATAAGACACTGCAAGATAAGCATGCCGATT  
ACCAGACAAACGGGGAAATTATATGTAAAGATTGTGGACAAGCTTGGGGAAATATGATGGT  
TCACCGAGGTCTTGACCTGCCTTGTCTAAAGATCCGAAATTTTGTGGTTGTGTTTGAAGACA  
AGAAAACAACGAAGCACATTTTAAAGAAATGGGGAGAACTGCCCGTCAGGTTTCCTAGTTT  
AGATTATGCAGCTCATTGTCCTTCAAGTGATGAAGAT

>himantopus\_himantopus-charadriiformes-mda5

ATGGCAGTGGAGTCCCGAGACGAGCGCTTCCTCTACATGATCTCCTGCTTCAGGCCGAGG  
CTGAAGCAGGTCATACGGGTGCAGCCGGTGCTGGACCGGCTTCCCTCGCTGAGCGCGGA  
GGAGCGGGAGAGGGTGCGGGCGGCCGCCGTGCAGCGGGGCGAGGTGGAGGGGGCGGA  
GGAGCTGCTGCGGACCGTGAGCGGGGGCCCCCGCGGGTGCGGCTGGTTCCACGAGTTC  
CTGCAGGCGCTGGAGCACGGCGGGCTGCAGCCTGGCTGCTTGCTATGTGGACCCCAACCT  
CAGCCAGCTGCCCTCGCCAGCCGAGGAGGCCGACCACGACCTCTGCGTGCATTGGTGC  
AGCTGCTCCACAGCACGCTGGTGGATAAAATGCAGACCATGCAGGTGGCTGAGAAGTGCC  
TGCAGATGGGCATCTTCCAGGACGATGACCTGGATCGGATCCACACTGTTACTGACAGAC  
ACGGGAACAGAGATGGTGCAAGGGAGCTATTGAGCAGAATAGTGCAGAAGAAAGACTGGT  
TCTCTCCTTTTTTGTAGTGCTTTGCGTGAAACCCAGCATGGAGACCTTGACAGATGATTTAAGC  
GGAAATACAGGAGGAACAGAGAATAGACAAAATGGAATGAAGAACAGTACAAGTGAAGAAA  
CAGAAGTTACAAGCCAACCAGGATACGCTGTAGTGAAGGATTTGAAACAAGAAGAAAATGT  
GAATGATAGTTTCAGCAGTGAGAACAGTGTATTGAAACATCTATTGAAAGAATTCTGGA  
GTTTCAGAGTCAGATGTTTCCATAGGAGATGGAAGTGTTGGTAACTTGAATGAAAACCTGG  
GACAGAGCTGCACAACCAAGTGATTCAGATGAAGATGAACTGGAGAGCAGAGCTTCACCTG  
AGCCAGATCTGATCCTGAGAGATTACCAGATGGAAGTTGCAAAGCCAGCACTGAATGGGG  
AGAATATCATAATATGTCTGCCTACAGGCAGTGGTAAAACCAAGAGTGGCTGTTTACGTTAC  
CAAAGATCACTTGGATAAGAAGAAAAGAGCATCAGAGCTTGGAAAAGTTATAGTACTTGTTA  
ATAAGGTACCGCTGGTAGAACAGCATTTACGAAAGGAGTTTAAATCCATTCTGAAGCGTTG  
GTATCGGGTTATTGGTTTAAAGTGGTGATTCTCGGCTGAAAATCTCATTTCTGAAGTTGTCA  
GAAGAAATGATGTCATCATCAGTACAGCACAGATCCTTGAGAATTCAGTGTTCATGACGC  
CGAAGAAGATGAAGAAGGTGTCCACTTATCAGATTTTTTCACTCATCATTATTGATGAGTGC  
ATCACACTCAAAGGAAGGCGTCTACAACAATATAATGCGACGTTACTTAAAAGAAAAGAG  
GAAGAACAGGAAGCTGGCAAAGAAAACAAACCACTCATCCCACAGCCTCAGATTCTGGG  
ACTTACAGCCTCACCTGGTGTAGGAGGTGCAACATCCAACCTCAAAGCTGAAGAACATATT  
CTGAAAATCTGTGCCAATCTTGATGCACGTAGAATCATGACTGTTGAAGAGCATGCTGCCC  
AATTGAAGAATCAAGTGAAGGAACCATATAAGAAGACTGTGATTGCAGATGACAAAAGAAG  
GGATCCATTTAGAGAGAGAATTACTGAGATCATGAGAGACATTCAAACCTATTGCCAACTCT  
ATCCAAAATCTGAGTTTGGAACTCAGCCATATGAACAGTGGGTGATTAGAGAAGAGAAAAA  
AGCTGCAAAAGAAGAAAAACGCAAGGAACGTGTCTGTGCAGAACACTTGAAGAAATACAAT  
GATGCACTCCAGATAAATGACACTATCCGAACCGTGGATGCATACAATCACCTAAACAACCT  
TTTATAAGGAGGAGAAAAAGTAAGAAGACAGTAAGGAGTGATGATGATGATGAACCAGCAGT  
ATCAAACAGGATGAAACAGATGAATTTCTAATAGGTTTATTTTCATGCCAAAAGAAACAGC  
TGAAAGAGTTGGCTAGAAAGCCAGAATATGAAAATGAGAAGCTAATACAGTTGCGAAACAC  
TTAATGGAGGAGTTCACGAAGACCGAAGAACCTAGAGGAATTATTTTACAAAGACTCGG  
CTAAGTGCCTTTGCTCTATTCCAGTGATTAAGGATAACCCAAAATTTGAAGAAGTGGGAAT  
TAAGGCCCATTTATCTTATTGGTGCTGGACATAACAGTGAAATTAAACCCATGACTCAGAATG

AGCAAAGGGAAGTCATTGATAAATTCCGAGGTGGAAGTGTAATTTACTTATTGCTACTACT  
GTAGCTGAGGAAGGCCTAGACATCAAAGAGTGTAACATCGTTATTCGCTATGGCCTCGTCA  
CCAATGAAATTGCTATGGTGCAGGCTCGTGGTCGAGCTCGAGCTGATGAGAGCACCTATG  
CACTTGTGGCTTCAAGTGTCTCAGGAGCTGTTGAACGTGAAGATGTTAATATTTTCCGTGA  
GAAAATGATGTATAAGGCCATTACGCGTGTCCAGAACATGCCGCAGGAAGAGTATTTAAAG  
AAGATTGAGAATTTGCAGTTGCAAAGTATAGTGGAACAAATGAAGGCAAAGAGAGATC  
AGCACAAGACATACAAAAAATCCTTCACTAGTAACATTCCATTGCAAAAATTGCCACAAG  
CTGGTATGTTCTGGAGAAGACATACAAGTTATTGAAACATGCATCATGTCAGTGTGAAAAA  
AGACTTCCAACTCTTTACAATACAAGAGAAAATAAGACGCTGCAAGATAAGCATGCCGATT  
ACCAGACAAATGGGGAAATTATATGTAAAGATTGTGGACAAGCTTGGGGAAATATGATGGT  
TCACCGAGGTCTTGACCTGCCTTGTCTAAAGATTAGAAATTTTGTGGTTGTGTTTGAAGACA  
AGAAAACAACAAAGCACATTTTAAAGAAATGGGGAGAACTGCCTGTCAGGTTTCCTAGTTTA  
GATTATGCAGCTCATTGTCCTTCAAGTGATGAAGAT

>recurvirostra\_avosetta-charadriiformes-md5

ATGGCGGTGGAGTCCCGAGACGAGCGCTTCCTCTACATGATCTCCTGCTTCAGGCCGAGG  
CTGAAGCAGGTCATACGGGTGCAGCCGGTGCTGGACCGGCTTCCCTCGCTGAGCGCGGA  
GGAGCGGGAGAGGGTGCGGGCGGCCGCCGTGCAGCGGGGCGAGGTGGAGGGGGCGGA  
GGAGCTGCTGCGGACCGTGAGCGGGGCCCCCGGGTGCGGCTGGTTCCACGAGTTC  
CTGCAGGCGCTGGAGCACGGCGGCTGCAGCCTGGCTGCTTGCTATGTGGACCCCAACCT  
CAGCCAGCTGCCCTCGCCAGCCGAGGAGGCCGACCACGACCTCTGCGTGCACCTGGTGC  
AGCTGCTCCACAGCACGCTGGTGGATAAAATGCAGACCATGCAGGTGGCTGAGAAGTGCC  
TGCAGATGGGCATCTTCCAGGACGATGACCTGGATCGGATCCCACTGTTACTGACAGAC  
ACGGGAACAGAGATGGTGCAAGGGAGCTATTGAGCAGAATAGTGAGAAGAAAGACTGGT  
TCTCTCCTTTTTTGTAGTGCTTTGCGTGAAACCCAGCATGGAGACCTTGAGATGATTTAAGC  
GGAAATACAGGAGGAACAGAGAATAGACAAAATGGAATGAAGAACAGTACAAGTGAAGAAA  
CAGAAGTTACAAGCCAACCAGGATACACTGTAGTGAAGGATTTGAAACAAGAAGAAAATGC  
GAATGATAGTTTCAGCAGTGAGAACAGTGTATTGGAAACATCTATTGGAAAGAATTCTGGA  
GTTTCAGAGTCAGATGTTTCCATAGGAGATGGAAGTGTTGGTAACTTGAATGAAAACCTGG  
GACAGAGCTGCACAACCAGTGATTCAGATGAAGATGAACTGGAGAGCAGAGCTTCACCTG  
AGCCAGATCTGATCCTGAGAGATTACCAGATGGAAGTTGCAAAGCCAGCACTGAATGGGG  
AGAATATCATAATATGTCTGCCTACAGGCAGTGGTAAAACCAGAGTGGCTGTTTACATTACC  
AAAGATCACTTGGATAAGAAGAAAAGAGCATCAGAGCTTGAAAAGTTATAGTACTTGTTAA  
TAAGGTACCGCTGGTAGAACAGCATTTACGAAAGGAGTTTAATCCGTTTCTGAAGCGTTGG  
TATCAGGTTATTGGTTTAAAGTGGTGATTCTCGGCTGAAAATCTCATTTCCTGAAGTTGTCAG  
AAGAAATGATGTCATCATCAGTACAGCACAGATCCTTGAGAATTCACCTTAAATGCAGCCG  
AAGAAGATGAAGAAGGTGTCCACTTATCAGATTTTTCACTCATCATTATTGATGAGTGCAT  
CACACTCAAAGGAAGGTGTCTACAACAATATAATGCGACGTTACTTAAAAGAAAAGAGGA  
AGAACAGGAAGCTGGCAAAGAAAACAAACCACTGATCCCACAGCCTCAGATTCTGGGAC  
TTACAGCCTCACCTGGTGTAGGAGGTGCAACATCCAACCTCAAAGCTGAAGAACATATTCT  
GAAAATCTGTGCCAATCTTGATGCACGTAGAATCATGACTGTTGAAGAGCATGCCTCCCAA  
TTGAAGAATCAGGTGAAGGAACCATATAAGAAGACTGTGATTGCAGATGACAAAAGAAGGG  
ATCCATTTAGAGAGAGAATTACTGAGATCATGAGAGACATTCAAACCTATTGCCAACTCTAT  
CCAAAATCTGAGTTTGGAACTCAGCCGTATGAGCAGTGGGTGATTAGAGAAGAGAAAAAAG  
CTGCAAAAAGAAGAAAAACGCAAGGAACGTGTCTGTGCAGAACACTTGAAGAAATACAATGA

TGCGCTCCAGATAAATGACACTATCCGAACAGTGGATGCATACAATCACCTAAACAACCTTTT  
ATAAGGAGGAGAGAAAAGTAAGAAGACAGTAAGGAGTGATGATGATGATGAACCAGCAGTATC  
AAAACAGGATGAAACAGATGAATTTCTAATAGGTTTATTTTCATGCCAAAAAGAAACAGCTGA  
AAGAGTTGGCTAGAAAAGCCAGAATATGAAAATGAGAAGCTAATACAGTTGCGAAACACTTT  
AATGGAGGAGTTCACGAAGACTGAAGAACCTAGAGGAATTATTTTCACAAAGACTCGGCTA  
AGTGCCCTTTGCTCTATTCCAGTGGATTAAGGATAACCCAAAATTTGAAGAAGTGGGAATTAA  
GGCCCATTATCTTATTGGTGCTGGACATAACAGTGAAATTAACCCCATGACTCAGAATGAG  
CAAAGGGAAGTCATTGATAAATTCCGAGGTGGAAGTGTAATTTACTTATTGCTACTACTGT  
AGCTGAGGAAGGCCTAGACATCAAAGAGTGTAACATCGTTATTTCGCTATGGCCTCGTCACC  
AATGAAATTGCTATGGTGCAGGCTCGCGGTCGAGCTCGAGCTGATGAGAGCACGTATGCA  
CTTGTGGCTTCAAGTGTCTCAGGAGCTGTTGAACGTGAAGATGTTAATATTTTCCGTGAGA  
AAATGATGTATAAGGCCATTCAGCGTGTCCAGAACATGCCGCAGGAAGAGTATTTAAAGAA  
GATTCAGAATTTGCAGTTGCAAAGTATAGTGGA AAAACAAATGAAGGCAAAGAGAGATCAG  
CACAAGACATACAAAAAAATCCTTCACTAGTAACATTCCATTGCAAAAATTGCCACAAGCT  
GGTATGTTCTGGAGAAGACATACAAGTTATTGAAAACATGCATCATGTCAAGTGTGAAGAAA  
GACTTCCAAACTCTTTACAATACAAGAGAAAAATAAGACGCTGCAAGATAAGCATGCCGATTA  
CCAGACGAATGGGGAAATTATATGTAAAGATTGTGGACAAGCTTGGGGAAATATGATGGTT  
CACCGAGGTCTTGACCTGCCATGTCTAAAGATTAGAAATTTTGTGGTTGTGTTTGAAGACAA  
GAAAACAACAAAGCACATTTTAAAGAAATGGGGAGAACTGCCTGTCAGGTTTCCTAGTTTA  
GATTATGCAGCTCATTGTCCATCAAGTGATGAAGAT

>falco\_peregrinus-falconiformes-mda5

ATGGCAGGGGAGTCCCGGGACGAGCGGTTCTCTACCTCATCTCCTGCTTCAGGCCGCG  
GCTGAAGCAGTTCATCCGGGTGCAGCCGGTGCTGGACCAGCTGCCCTCGCTGAGCGCGG  
AGGAGAGGGAGAAAGGTGCGGGCGGCCGCGCTGCAGCGGGGCGAGGTGGCGGGGGCGG  
AGGAGCTGCTGCGGGCCGTGGAGCGGGGCCCCCGCGGTTGCGGCTGGTTTCACGAGTT  
CCTGCAGGCGCTGGAGCACGGCGGCTGCAGCCTGGCCGCTGCTACGTGAACCCAGCC  
TCAGCCACCTGCCGTGCGCGGCCGAGGAGGCCGACCACGACCTCTGCGTGCACTTGGTG  
CAGCTGCTCCACGGCACGCTGGTGGATAGAATGCAGACCATGCAGGTGGCCGAGAAGTG  
CCTGCAGAAGGGCATCTTCCAGGATGAGGACCTGGATCGGATCCAGACTGTTACTGACAA  
TCGTGGGAACAGAGATGGTGCAAGGGAGCTACTGAGCAGAATAGTGCAAGAAGAAAGATTG  
GTTCTCACCTTTTTTGGTTGCTCTGCGTGAAACCCAAACATGGAGACCTTGCAAGATGATTTAA  
GCGGAAATACAGGAGGAAGAGAGAATACACAAAATGAGATGAAAAGCAGTACAAATGAAG  
AAACGGAAATTAAGGCCAACCAGGATATGCTGAAATGGAGAATCTGAAACAGCAAGAAAA  
TACGAATGATAGTTTCAGCAGTGAGAACTGTGTATTGGAAACATCCATTGGAAAGGATTCT  
GTAGTTTCAGAGTCCGATGTCTCCATAGGAGATGGAAGGTTTCGGTAACTTGAATGAAAACC  
TGGGACAGAGCTGTACAACCAGTGATTCAGATGAAGATGAAATGGAGAGCAGAGCTTCAC  
CTGAGCCAGAAATGATCCTGAGAGATTACCAGATGGAAGTTGCAAAGCCAGCACTGAATG  
GGGAGAATATTATAATATGTCTCCCTACAGGCAGTGGTAAAACCAGAGTGGCTGTTTACAT  
TACCAAAGATCACTTGGATAAGAAGAAAAGAGCATCAGAGCTTGGAAAAGTTATAGTACTT  
GTTAATAAGGTACCATTGGTAGAACAGCATTTACGAAAGGAGTTTAATCCATTCTGAAGCG  
TTGGTATCAGGTTATTGGTTTAAGTGGTGATTCTCAGCTGAAAATCTCATTTCTGAAGTTG  
TCAGAAGGAATGATGTCATCATCAGTACAGCACAGATCCTTGAGAATTCAGTGTAAATGCA  
GCTGAAGAAGATGAAGAAGGTGTTCACTTATCAGATTTTTCACTCATCATTATTGATGAGTG  
TCATCATACTCAAAAGGAGGGTGTCTACAACGATATAATGCGACGTTACTTAAAAGAAAAGA



TGAAGAACAGGAAGCTGGCAAAAGAAAACAAACCACTGATCCCACAGCCTCAGATTCTGG  
GACTTACAGCCTCACCTGGTGTAGGAGGTGCAACATCCTACTCAAAGCTGAAGAGCATAT  
TCTGAAAATCTGTGCCAACCTTGATGCATGCAGAATCATGACTGTTGAAGAGCATGTCTCC  
CAGTTGAAGAATCAGGTGAAGGAACCATATAAGAAGACTGTGATTGCAGATGACAAAAGAA  
GGGATCCATTTAGAGAGAGAATTACTGAGATCATGACAGACATTCAAACCTATTGCCAGCT  
CTATCCAAAATCTGAGTTTGGAACTCAGCCATATGAACAGTGGGTGGTGTAGAGAAGAGAAA  
AAAGCTGCAAAAGAAGAAAAACGTAAGGAGCGTGTCTGTGCAGAGCACTTGAAGAAATACA  
ATGATGCTCTCCAGATAAATGACACTATCCGAATGGTAGATGCGTACAATCATCTAAATAAC  
TTCTATAAGGAGGAGAAAAGTAAGAAGACAGTAAGGAGCGATGATGATGATGAACCAGCA  
GTATCAAAACAGGATGAAACAGATGAATTTCTAATAGGTTTATTTTCATGCAAAAAAGAAACA  
GCTGAAAGAGTTGGCTAGAAAGCCAGAATATGAAAATGAGAAGCTAATACAGTTGCGAAAC  
ACTTTAATGGAGGAGTTCACGAAGACTAAGGAACCTAGAGGAATTATTTTCACAAAGACTC  
GGCTAAGTGCCGTTGCTCTGTTCCAGTGGATTAAGGATAACCCAAAATTTGAAGAAGTGGG  
AATTAAAGCCCATACCTTATTGGTGCTGGACATAACAGTGAAATGAAACCCATGACTCAGA  
ATGAGCAAAGGGAAGTTATTGATAAATTCCGAGGTGGAAATGTAAATTTACTTATTGCTACT  
ACTGTAGCTGAGGAGGGCCTAGACATCAAAGAGTGTAACATCGTTATTTCGCTATGGCCTTG  
TCACCAATGAAATTGCTATGGTGCAGGCTCGTGGTCGAGCTCGAGCTGATGAGAGCACCT  
ATGCACTTGTGGCTTCCAGTGGCTCAGGAGCTGTTGAACGTGAAGATGTTAATATTTTCCG  
TGAGAAAATGATGTATAAGGCCATTGAGCGTGTCCAGAAGATGCCACAGGAGGAGTATTTG  
AATAAGATTCAGAATTTCCAGTTGCAAAGTATAGTGGA AAAACAAATGAAGGCAAAAAGAGA  
TCAGTGCAAAATATACAAGAAAAATCCTTCACTAATAACATTCCTATGCAAAAATTGCCACAA  
GCTGATATGTTCTGGAGAAGACATCCAAGTTATTGAAAAATGCATCATGTCAGTGTGAAAA  
ATGATTTCCAAAGTCTTTACCATACAAGAGAAAATAAGACACTGCAAGATAAGCATGCCGAT  
TACCAGACAAATGGGGAAATAATATGTAAAGATTGTGGACAAGCTTGGGGAAATATGATGG  
TTCACCGAGGTCTTGACCTACCTTGTCTAAAGATTAGAAATTTTGTGGTTGTGTTTGAAGAC  
AAGAAAACAACAAAGAACATTTTTAAGAAATGGGGGAGAACTGCCTGTCACATTCCCTACTTT  
TGATTATGCAGCTCATTGTCCTTCAAGTGATGAAGAT

>herpetotheres\_cachinnans-falconiformes-mda5

ATGGCCGCGGAGTCCCGAGACGAGCGCTTCCTCTACCTGATCTCCTGCTTCAGGCCGCG  
GCTGAAGCAGTTCATTCGGGTGCAGCCGGTGCTGGACCAGCTTCCCTCGCTGGGCGCGG  
AGGAGCGGGAGAAGGTGCGGGCGGCCGCCCTGCAGCGGGGCGAGGTGGAGGGGGCAG  
AGGAGCTGCTGCGGGCCGTGGAGCGGGGGCCCCGCGGCTGCGGCTGGTTTCACGAGTT  
CCTGCAGGCGCTGGAGCACGGCGGCTGCAGCCTGGCCGCCTGCTACGTGAACCCAGCC  
TCAGCCAGCTGCCGTCGCCGGCCGAGGAGGCCGACCACGACCTCTGCGTGCACTTGGTG  
CAGCTGCTCCACGGCACGCTGGTGGATAGAATGCAGACCATGCAGGTGGCCGAGAAGTG  
CCTGCAGAAGGGCATCTTCCAGGACGAGGACCTGGATCGGATCCAGACTGTTACAGACAA  
TCGTGGGAACAGAGATGGTGCAAGGGAGCTACTGAGCAGAATAGTGAGAAGAAAGATTG  
GTTCTCACCTTTTTTGGTTGCTCTGCGTGAAACCCAACATGGAGACCTTGCAGATGATTTAA  
GTGGAAATACAGGAGGAAGAGAGAATAGACAACATGGGATGAAGAACAGTACAAATGAAG  
AAACAGAAATTACAAGCCAAGCAGGATATGCTGTAGTGGAGAATTTGAAACAGCAAGAAAA  
TATGAGTGATAGTTTCAGCAGTGAGAACAGTGTATTGGAGACACCTATTGGAAAGGATTCT  
GTAGTTTCAGAGTCCGGTGTCTCCATAGGAGATGGACGTGTCAGTAACTTGAATGAAAACC  
TGGGACAGAGCTGCACAACCAGTGATTCAGATGAAGATGAAGTGGAGAGCAGAGCTTCAC  
CTGAGCCAGAACTGATCCTGAGAGATTACCAGATGGAAGTTGCAAAGCCAGCACTGAATG

GGGAGAATATTATAATATGTCTCCCTACAGGCAGTGGTAAAACCAGAGTGGCTGTTTACAT  
TACCAAAGATCACTTGGATAAGAAGAAAAGAGCATCAGAGCTTGGAAAAGTTATAGTACTT  
GTTAATAAGGTACCGTTGGTAGAACAGCATTTACGAAAGGAGTTTAACCCATTCTGAAGC  
GTTGGTATCAGGTTATTGGTTTAAGTGGTGATTCTCAGCTGAAAATCTCATTTCTGAAGTT  
GTCAGAAGAAATGATGTCATCATCAGTACAGCACAGATCCTTGAGAATTCAGTGTAAATGC  
AGCTGAAGAAGATGAAGAAGGTGTCCACTTATCAGATTTTTCTACTCATCATTATTGATGAGT  
GTCATCATACTCAAAAGGAGGGTGTCTACAACAATATAATGCGACGTTACTTAAAAGAAAAG  
ATGAAGAACAGGAACTGGCAAAAGAAAACAAACCACTGATTCCACAGCCTCAGATTCTGG  
GACTTACAGCCTCACCTGGTGTAGGAGGTGCAACATCCTACTCAAAGCTGAAGAACATAT  
TCTGAAAATCTGTGCCAACCTTGACGCATACAGAATCATGACTGTTGAAGAGCATGTCTCC  
CAGTTGAAGAATCAGGTGAAGGAACCGTATAAGAAGACTGTGATTGCAGATGACAAAAGAA  
GGGATCCATTTAGAGAGAGAATTACTGAGATCATGACAGACATTCAAACCTATTGCCAGCT  
CCATCCAAAATCTGAGTTTGGAACCTCAGCCATATGAACAGTGGGTGATTAGAGAAGAGAAA  
AAAGCTGCAAAAGAAGAAAAACGCAAGGAACGTGTCTGTGCAGAGCACTTGAAGAAATACA  
ATGATGCTCTCCAGATAAATGACACCATCCGAATGGTAGATGCGTACAATCATCTAAATAAC  
TTTTATAAGGAGGAGAAAAGTAAGAAGACAGTAAGGAGTGATGATGATGATGAACCAGCAG  
TATCAAACAGGATGAAACAGATGAATTTTTAATAGGTTTATTTTCATGCAAAAAGAAACAG  
CTGAAAGAGTTGGCTAGAAAGCCAGAATATGAAAATGAGAAGCTAATACAGTTGCGAAACA  
CTTTAATGGAGGAGTTCACGAAGACTGAGGAACCTAGAGGAATTATTTTCACAAAGACTCG  
GCTAAGTGCCCTTGCTCTATTCCAGTGGATTAAGGATAACCCGAAATTTGAAGAAGTGGGA  
ATTAAAGCCCATTATCTTATTGGTGCTGGACATAACAGTGAAATTAAACCCATGACTCAGAA  
TGAGCAAAGGGAAGTTATTGATAAATTCCGAGGTGGAAATGTAAATTTACTTATTGCTACTA  
CTGTAGCTGAGGAAGGCCTAGACATCAAAGAGTGTAACATTGTTATTCGCTATGGCCTCGT  
CACCAATGAAATTGCTATGGTGCAGGCTCGTGGTTCGAGCTCGAGCTGATGAGAGCACCTA  
TGCACTTGTGGCTTCCAGTGGTTCAGGAGCTGTTGAACGTGAAGATGTTAATATTTTCCGT  
GAGAAAATGATGTATAAGGCCATTTCAGCGTGTCCAGAAGATGCCGCAGGAAGAGTATTTGA  
ATAAGATTCAGAATTTCCAGTTGCAAAGTATAGTGGA AAAACAAATGAAGGCAAAGAGAGAT  
CAGCGCAAGATATACAAGAAAAATCCTTCACTAATAACATTCCCTATGCAAAAATTGCCACAA  
GCTGATATGTTCTGGAGAAGACATACAAGTAATTGAAAACATGCATCATGTCAAGTGTGAAAA  
AAGATTTCAAAGTCTTTACCATACAAGAGAAAAATAAGACACTGCAAGATAAGCATGCAGAT  
TACCAGACAAATGGGGAAATTATATGTAAAGATTGTGGACAAGCTTGGGGAAATATGATGG  
TTCACCGAGGTCTTGACCTACCTTGTCTAAAGATTAGAAATTTTGTGGTTGTGTTTGAAGAC  
AAGAAAACAACAAAGAACATTTATAAGAAATGGGGAGAACTGCCTGTCACATTCCCTACTTT  
TGATTATGCAGCTCATTGTCTTCAAGTGATGAAGAT

>athene\_cunicularia-strigiformes-mda5

ATGGCGAAGGAATCCCGAGACGAGCTCTTCCTCTACATGATCTCCTGCTTCAGGCCGCGG  
CTGAAGCAGTTCATCCGGGTGCAGCCGGTGCTGGACCAGCTTCCCTCGCTGAGCGCGGA  
GGAGAGGGAGAAGGTGCGGGCGGCCGCCCGGCATGGGGGCGAGGTGGAGGGGGCGGA  
GGAGCTGCTGCGGGCCGTGGAGCGGGGCCCGCGGGTGCGGCTGGTTCCACGAGTTC  
CTGCAGGCGCTGCAGCACGGCGGCTGCACCCTGGCCGCTGCTACGTGAACCCAGCCT  
CAGCCAGCTGCCCTCGCCGGCCGAGGAGGCCGACCACGACCTCTGCGTGCATTGGTGC  
AGCTGCTCCACAGCACACTGGTGGATAGAATGCAGACCATGCAGGTGGCCGAGAAGTGCC  
TAGAGATGGGCATCTTCCAGGACGAGGACATGGATCAGATCCACACTGTTACTGACAATCG  
TGGGAACAGAGAGGGTGCAAGGGAGCTATTGAGCAGAATAGTGCAGAAGAAAGATTGGTT

CTCTCCTTTTTTGATTGCTTTGCGTGAAACCCAACATGGAGGCCTTGCAGATGATTTATGTG  
GAAATACAGGAGGAACAGAGAATAGACAAAATGAGGTGAAGAAGTGTACAAACGAAGAAAC  
AGAAGTTGCAAGCCAACCAGGATATGCTGTAGTAGAGGAGTTGAAACAGCATGAAAATGTG  
AATGATAGTTTCATCAGTGAAAACAATGTATTGGAAACATCTGTTGGAAAGAGTTCTGTAGT  
TTCAGAGTCAGATGTCTCCATAGGAGATGGAAGTGTGAGTAACTTGGATGAAAACCTGGGA  
CAGAGCTGCACAACCAGTGATACAGATGAAGATGAAGTGGAGAGCAGAGCTTCACCTGAG  
CCAGATCTGATCCTGAGAGATTACCAGATGGAAGTTGCAAAGCCAGCACTGAATGGGGAG  
AATATTATCATATGTCTCCCTACAGGCAGTGGTAAAACCAGAGTGGCTGTTTACATTACCAA  
AGATCACTTGGATAAGAAGAAAATTGCATCAGAGCCTGGCAAAGTTATAGTACTTGTTAATA  
AGGTACCACTGGTAGAACAACATTTACGAAAGGAGTTTAATCCATTCCTGAAGCGTTGGTA  
TCAGGTTATTGGTTTAAGTGGTGATTCTCAGCTGAAAATCTCATTTCCCTGAAGTTCTCAGAA  
GAAATGATGTCATCATCAGTACAGCACAGATCCTTGAGAATTCAGTGTTAAATGCAGCCAAA  
GAAGACGAAGAAGGTGTCCACCTATCAGATTTTTCACTTATCATTATTGATGAGTGTGATCA  
CACTCAAAAGGAAGGTGTCTACAACAATATAATGCGACGATACTTAAAAGAAAAGATGAAG  
AACAGGAAGCTGGCAAAAGAAAACAAACCACTGATCCCGCAGCCTCAGATTCTGGGACTTA  
CAGCCTCACCTGGTGTAGGAGGTGCAACATCCTACTCAAAAGCTGAAGAACATATTCTGAA  
AATCTGTGCCAATCTGGATGCATGTAGAATCATGACTGTTGAAGAGCATGCATCCCAGCTG  
AAGAATCAGGTGAAGGAACCATATAAGAAGACTGTGATTGCAGATGATGAGAGAAGGGATC  
CATTTAGAGAGAGAATTACTGAGATCATGACAAGCATTCAAACTATTGCCAGCTCCATCCA  
AAATCTGAGTTTGGAACTCAGCCATATGAACAGTGGGTGATCAGAGAAGAGAGGAAAGCT  
GCAAAAGAAGAAAAACGCAAGGAACGTGTCTGTGCAGAGCACTTGAAGAAATACAATGATG  
CTCTCCAGATAAATGACACCATCCGAATGGTGGATGCATACAATCACCTAAATAACTTTTAT  
AAGGAGGAGAAAAAGTAAGAAGATGGTAAGGAGTGATGATGATGAACCAGCAGTATCA  
AAACATGATGAAACAGATGAATTTCTAATAGGTTTATTTTCATGCAAAAAAGAAACAGCTGAA  
AGAGTTGGCTAGAAAACCAGAATATGAAAATGAGAAGTTAATACAGTTGCGAAACACTTTAA  
TGGAGGAGTTCACGAAGACTGAAGAACCTAGAGGAATTATTTTCACAAAGACTCGGCTAAG  
TGCTTTTGCTCTATTCCAGTGGATTAAGGATAACCCCAAATTTGAAGAAGTGGGAATTAAGG  
CCCATTATCTTATTGGTGTCTGGACATAAGAGTGAAATTAAACCCATGACTCAGAATGAGCAA  
AGGGAAGTTATTGATAAATTCCGAGGTGGAATGTAAATTTACTTATTGCTACTACTGTAGC  
TGAGGAAGGCCTAGACATCAAAGAGTGTAACATTGTTATTGCTATGGCCTTGTACCAAT  
GAAATTGCTATGGTGCAGGCTCGTGGTCGAGCTCGAGCTGATGAGAGCACCTATGCACTT  
GTGGCTTCAAGTGGCTCAGGAGCTGTTGAACGTGAAGATGTTAATATTTTCCGTGAGAAAA  
TGATGTATAAGGCCATTCAGCGTGTCCAGAAGATGCCTCAGGAAGAGTATTTAAATAAGAT  
TCACAATTTCCAGTTGCAAAGTATAGTAGAAAAAAAATGAAGGCAAAGAGAGATCAGTGC  
AAGACATACAAGAAAAATCCTTCACTAATAACATTCTTATGCAAAAATTGCCACAAGCTGGT  
ATGTTCTGGAGAAGACATACAAGTTATTGAAAAGATGCATCATATCAGTGTGAAAAAAGACT  
TCAAAAGTCTTTACCATACAAGAGAAAAATAAGACACTGCAAGATAAACATGCCGATTACCAG  
ACCAATGGAGAAATTATATGTAAAGATTGTGGACAAGCTTGGGGAAATATGATGGTTCACC  
GAGGTCTTGACCTGCCTTGTCTAAAGATTAGAAATTTTGTGGTTGTGTTTGAAGACAAGAAA  
ACAACAAAGCAAATTTTTAAGAAATGGGGAGAACTGCCCATCATGTTCCCTAGTTTTGATTA  
TGCAGCTCATTATCCTTCAAGTGATGAAGAT

>otus\_sunia-strigiformes-mda5

ATGGCGAAGGAGTCCCGAGACGAGCGCTTCCTCTACATGATCTCCTGCTTCAGGCCGCGG  
CTGAAGCAGGTCATCCGGGTGCAGCCGGTGCTGGACCAGCTTCCTCGCTGAGCGCGGA

GGAGAGGGAGAAGGTGCGGGCGGCCGCCCTGCAGCGGGGAGAGGTGGAGGGGGCGGA  
GGAGCTGCTGCGGGCCGTGGAGCGGGGCCCCCGCGGGTGCGGCTGGTTCCACGAGTTC  
CTGCAGGCGCTGGAGCACGGCGGGCTGCAGCCTGGCCGCCTGCTACGTGAACCCAGCCT  
CAGCCAGTTGCCCTCGCCGGCCGAGGAAGCCGACCACGACCTCTGCGTGCACTTGGTGC  
AGCTGCTCCACAGCACACTGGTGGATAGAATGCAGACCATGCAGGTAGCCGAGAAGTGCC  
TAGAGATGGGCATCTTCCAGAACGAGGACATGGACCGGATCCCACTGTTACTGACAATC  
GTGGGAACAGAGAGGGTGCAAGGGAGCTATTGAGCAGAATAGTGCAGAAGAAAGATTGGT  
TCTCTTCTTTTTTGATTGCTCTGCGTGAAACCCAACATGGAGGCCTTGCAGATGATTTGAGT  
GGAAATACAGGAGGAACAGAGAATAGCCAAAATGGGATGAAGAACTGTACAAATGAAGAAA  
CAGAAGTTGCAAGCCAAACAGGATATGCTGTAGTAGAGGACTTGAAACATCAAGAAAATGT  
GAATGATAGTTTCAGCAGTGAGAACAGTGTTTTGGAAACATCTGTTGGAAAGAATTCTGTAG  
TTTCAGAGTCAGATGTCTCCTTAGGAGATGGAAGTGTCAGTAACTTGGATGAAAACCTGGG  
ACAGAGCTGCACAACCAGCGATACAGATGAAGATGAAGTGGAGAGCAGAGCTTCACCTGA  
GCCAGATCTGATCCTGAGAGATTACCAGATGGAAGTTGCAAGCCAGCACTGAATGGGGA  
GAATATTATCATATGTCTCCCTACAGGCAGTGGTAAAACCAGAGTGGCTGTTTACATTACCA  
AAGATCACTTGGATAAGAAGAAAAGAACATCAGAGCCCCGAAAAAGTTATAGTACTTGTTAAT  
AAGGTACCACTGGTAGAACACATTTACGAAAGGAGTTTACTCCATTCCCTGAAGCGTTGGT  
ATCAGGTTATTGGTTTAAAGTGGTGATTCTCAGCTGAAAATCTCATTTCCCTGAAGTTGTCAGA  
AGAAATGATGTCATCATCAGTACAGCACAGATCCTTGAGAATTCAGTGTTAAATGCAGCCAA  
AGAAGATGAAGAAGGTGTCCACTTATCAGATTTTTCACTTATCATTATCGATGAGTGTATC  
ACACTCAAAAGGAAGGTGTCTACAACAATATAATGCGGCGTTACTTAAAAGAAAAGATGAA  
GAACAGGAAGCTGGCAAAAGAAAACAAACCACTGATCCCGCAGCCTCAGATTCTGGGACT  
TACAGCCTCACCTGGTGATGGCGGTGCAACATCCTACTCAAAAGCTGAAGAACATATTCTG  
AAAATCTGTGCCAATCTTGATGCATGTAGAATCATGACTGTTGAAGAGCATGCCTCCAGC  
TGAAGAATCAGGTGAAGGAACCATATAAGAAGACTGTGATTGCAGATGACAAGAGAAGGG  
ATCCATTCAGAGAGAGAATTACTGAGATCATGACAGACATTCAAACTATTGCCAGCTCCAT  
CCAAAATCTGAGTTTGGAACCTCAGCCATATGAACAGTGGGTGATCAGAGAAGAGAGGAAA  
GCTGCAAAAGAAGAAAAACGCAAGGAACGTGTCTGTGCAGAGCACTTGAAGAAATACAATG  
ATGCTCTCCAGATAAATGACACCATCCGAATGGTGGATGCGTACAATCACCTAAATAACTTT  
TATAAGGAGGAGAAAAGTAAGAAGATGGTAAGGAGTGACGATGATGATGAACCAGCAGTAT  
CGAAACAGGATGAAACAGATGAATTTCTAATAGGTTTATTTTCATGCAAAAAAGAAACAGCTG  
AAAGAGTTGGCTAGAAAACCAGAATATGAAAATGAGAAGCTAATACAGTTGCGAAACACTTT  
AATGGAGGAGTTCACGAAGACTGAAGAACCTAGAGGAATTATTTTCACAAAGACTCGGCTA  
AGTGCCCTTTGCTCTATTCCAGTGGATTAAGGATAACCCAAAATTTGAAGAAGTGGGAATTAA  
GGCCATTATCTTATCGGTGCTGGACATAACAGTGAAATTAACCCATGACTCAGAATGAG  
CAAAGGGAAGTTATTGATAAATTCCGAGGTGGAAATGTAAATTTACTTATTGCTACTGCTGT  
AGCTGAGGAAGGCCTAGACATCAAAGAGTGTAACATTGTTATTAGCTATGGCCTCATCACC  
AATGAAATTTCTATGGTGCAGGCTCGTGGTGCAGCTCGAGCTGATGAGAGTACCTATGCAC  
TTGTGGCTTCAAGTGGCTCAGGAGCTGTTGAACGTGAAGATGTTAATTTTTCCGTGAGAA  
AATGATGTATAAGGCCATTACGCGTGTCCAGAAGATGCCGCAGGAAGAGTATTTAAAGAAG  
ATTGATAATTTCCAGTGGCAAAGCATAGTAGAAAAACAAATGAAGGCAAAGAGAGATCAGT  
GCAAGCCATACAAGAAAAATCCTTCACTAATAACATTCTTATGCAAAAATTGCCACAAGCTG  
ATCTGTTCTGGAGAAGACATACAAGTTATTGAAAAGATGCATCATGTCAGTGTGAAAAAAGA  
CTTCCAAAGTCTTTACCATACAAGAGAAAATAAGACACTGCAAGATAAACATGCCGATTACC

AGACAAATGGAGAAATTATATGTAAAGATTGTGGACAAGCTTGGGGAAATATGATGGTTCA  
CCGAGGTCTTGACCTGCCTTGCCTAAAGATTAGAAATTTTGTGGTTGTGTTTGAAGACAAG  
AAAACAACAAAGCAAATTTTTAAGAAATGGGGGAGAACTGCCCATCATGTTCCCTAGTTTTGA  
TTATGCATCTCATTGTCCTTCAAGTGATGAAGAT

>bubo\_blakistoni-strigiformes-mda5

ATGGCGAAGGAGTCCCGAGACGAGCGCTTCCTCTACATGATCTCCTGCTTCAGGCCGCGG  
CTGAAACAGTTCATCCGGGTGCAGCCGGTACTGGACCAGCTTCCCTCGCTGAGCGCGGA  
GGAGAGGGGAGAAGGTGCGGGCGGCCGCCCTGCAGCGGGGCGAGGTGGAGGGGGCGGA  
GGAGCTGCTGCGGGCCGTGGAGCGGGGCCCGCGGGTGCGGCTGGTTCTACGAGTTC  
CTGCAGGCGCTGGAGCACGGCGGCTGCAGCCTGGCTGCCTGCTACGTGAACCCAGCCT  
CAGCCAGCTGCCCTCGCCGGCCGAGGAGGCCGACCACGACCTCTGTGTGCACTTGGTGC  
AGCTGCTCCACAGCACACTGGTGGATAGAATGCAGACCATGCAGGTGGCCGAGAAGTGCC  
TAGAGATGGGCATCTTCCAGGACGAGGACATGGACCGGATCCACGCTGTTACTGACAATC  
GTGGGAACAGAGAGGGTGCAAGGGAGCTGTTGAGCAGAATAGTGCAGAAGAAAGATTGGT  
TCTCTCCTTTTTTGATTGCTCTGCGTGAAACCCAACATGGAGGCCTTGCAGATGATTTAAGT  
GGAAATACAGGAGGAACAGAGAATAGACAAAATGGGATGAAGAACTGTACAAACGAAGAA  
ACAGAAGTTGCAAGCCAGCCAGGATATGCTGTAGTAGAGGACTTGAAACAGCAAGAGAAT  
GTGAATGATAGTTTCAGCAGTGAGAACAGTGTTTTGGAAACATCTATTGGAAAGAATTCTGT  
AGTTTCAGAGTCAGATGTCTCCTTAGGAGATGGAAGTGTGAGTAACTTGGATGAAAACCTG  
GGACAGAGCTGCACAACCAGTGATACAGATGAAGATGAAGTGGAGAGCAGAGCTTCACCT  
GAGCCAGATCTGATCCTGAGAGATTACCAGATGGAAGTTGCAAAGCCAGCACTGAATGGG  
GAGAATATTATCATATGTCTCCCTACAGGCAGTGGTAAAACCAGAGTGGCTGTTTACATTAC  
CAAAGATCACTTGGATAAGAAGAAAAGAGCATCAGAGCCCGGAAAAGTTATAGTACTTGTT  
AATAAGGTACCACTGGTAGAACAACATTTACGAAAGGAGTTTACTCCATTCTGAAGCGTT  
GGTATCAGGTTATTGGTTTAAAGTGGTGATTCTCAACTGAAAATCTCATTTCTGAAGTTGTC  
AGAAGAAATGATGTCATCATCAGTACAGCACAGATCCTTGAGAATTCAGTGTAAATGCAGC  
CAAAGAAGATGAAGAAGGTGTCCACTTATCAGATTTTTTCACTTATCATTATCGATGAGTGTC  
ATCACACTCAAAGGAAGGTGTCTACAACAATATAATGCGACGTTACTTAAAAGAAAAGATG  
AAGAACAGGAAGCTGGCAAAGAAAACAAACCACTGATCCCGCAGCCTCAGATTCTGGGA  
CTTACAGCCTCACCTGGTGTAGGCGGTGCAACATCCTACTCAAAGCTGAAGAACATATTC  
TGAAAATCTGTGCCAATCTTGATGCGTGTAGAATCATGACTGTTGAAGAGCATGCCTCCCA  
GCTGAAGAATCAGGTGAAGGAACCATATAAGAAGACTGTGATTGCAGATGACAAGAGAAG  
GGATCCATTTAGAGAGAGAATTACTGAGATCATGACAGGCATTCAAACCTATTGCCAGCTC  
CATCCAAAATCTGAGTTTGGAACTCAGCCATATGAACAGTGGGTGATCAGAGAAGAGAGGA  
AAGCTGCAAAGAAGAAAAACGCAAGGAACGTGTCTGTGCAGAGCACTTGAAGAAATACAA  
TGATGCTCTCCAGATAAATGACACCATCCGAATGGTGGATGCATACAATCACCTAAATAACT  
TTTATAAGGAAGAGAAAAAGTAAGAAGATGGTAAGGAGTGACGATGATGATGAACCAGCAGT  
ATCAAACAGGATGAAACAGATGAATTTCTAATAGGTTTATTTTCATGCAAAAAAGAAACAGC  
TGAAAGAGTTGGCTAGAAAACCAGAATATGAAAATGAGAAGCTAATACAGTTGCGAAACAC  
TTAATGGAGGAGTTCACGAAGGCTGAAGAACCTAGAGGAATTATTTTACAAAGACTCGG  
CTAAGTGCCCTTTGCTCTATTCCAGTGGATTAAGGATAACCCAAAATTTGAAGAAGTGGGAAT  
TAAGGCCCATTTATCTTATCGGTGCTGGACATAACAGTGAAATTAACCCATGACTCAGAATG  
AGCAAAGGGAAGTTATTGATAAATTCCGAGGTGGAAATGTAAATTTACTTATTGCTACTACT  
GTAGCTGAGGAAGGCCTAGACATCAAAGAGTGTAACATCGTTATTAGCTATGGCCTCATCA

CCAATGAAATTGCAATGGTGCAGGCTCGTGGTCGAGCTCGAGCTGATGAGAGCACCTATG  
CACTTGTGGCTTCAAGTGGCTCAGGAGCTGTTGAACGTGAAGATGTTAATATTTTCCGTGA  
GAAAATGATGTATAAGGCCATTACGCGTGTCCAGAAGATGCCACAGGAAGAGTATTTAAAG  
AAGATTGATAATTTCCAGTGGCAAAGTATAGTAGAAAAACAAATGAAGGCCAAAGAGAGATC  
AGTGCAAGCCATACAAGAAAAACCCTTCACTAATAACATTCTTATGCAAAAATTGCCACAAG  
CTGATATGTTCTGGAGAAGACATACAAGTTATTGAAAAGATGCATCATGTCAGTGTGAAAAA  
AGACTTCCAAAGTCTTTACCATACAAGAGAAAAATAAGACACTGCAAGATAAACATGCCGATT  
ACCAGACAAATGGAGAAATTATATGTAAAGATTGTGGACAAGCTTGGGGAAATATGATGGT  
TCACCGAGGCCTTGACCTGCCTTGTCTAAAGATTAGAAATTTTGTGGTTGTGTTTGAAGACA  
AGAAAACAACAAAGCAAATTTTTAAGAAATGGGGAGAACTGCCCATCATGTTCCCTAGTTTT  
GATTATGCAGCTCACTGTCCTTCAAGTGAAGAT

>asio\_otus-strigiformes-mda5

ATGGCGAAGGAGTCCCGAGACGAGCGCTTCCTCTACATGATCTCCTGCTTCAGGCCGCGG  
CTGAAGCAGTTCATCCGGGTGCAGCCGGTGTCTGGACCAGCTTCCCTCGCTGAGCGCGGA  
GGAGAGGGGAGAAGGTGCGGGGCGGCCGCCCTGCAGCGGGGCGAGGTGGAGGGGGCGGA  
GGAGCTGCTGCGGGCCGTGGAGCGGGGCCCGCGGGTGC GGCTTGTTCACGAGTTC  
CTGCAGGCGCTGGAGCACGGCGGCTGCAGCCTGGCCGCCTGCTACGTGAACCCAGCCT  
CAGCCAGCTGCCCTCGCCGGCCGAGGAGGCTGACCACGACCTCTGTGTGCAATTGGTGC  
AGCTGCTCCACAGCACACTGGTGGATAGAATGCAGACGATGCAGGTGGCCGAGAAGTGC  
CTAGAGATGGGCATCTTCCAGGACGAGGACATGGACCGGATCCACGCTGTTACTGACAAT  
CGTGGAACAGAGAGGGTGCAAGGGAGCTATTGAGCAGAATAGTGCAGAAGAAAGATTGG  
TTCTCTCCTTTTTTGATTGCTCTGCGTGAAACCCAACATGAAGGCCTTGAGATGATTTAAG  
TGGAATACAGGAGGAACAGAGATTAGACAAAATGGGATGAAGAACTGTACAAATGAAGAA  
ACAGAAGTTGCAAGCCAACCAGGATATGCTGTAGTAGAGGACTTGAAACAGCAAGAAAATG  
TGAATGATAGTTTCAGCAGTGAGAACAGTGTTTTGGAAACATCTATTGGAAGAATTCTGTA  
GTTTCGGAGTCAGATGTCTCCTTAGGAGATGGAAGTGTGAGTAAGTGGATGAAAACCTGG  
GACAGAGCTGCACAACCAGCGATACAGATGAAGATGAAGTGGAGAGCAGAGCTTCACCTG  
AGCCAGATCTGATCCTGAGAGATTACCAGATGGAAGTTGCAAAGCCAGCACTGAATGGGG  
AGAATATTATCATATGTCTCCCTACAGGCAGTGGTAAAACCAGAGTGGCTGTTTACATTACC  
AAAGATCACTTGGATAAGAAGAAAAGAGCATCAGAGCCCGGAAAAGTTATAGTACTTGTTA  
ATAAGGTACCACTGGTAGAACAAACATTTACGAAAGGAGTTTACTCCGTTTCTGAAGCGTTG  
GTATCAGGTTATTGGTTTAAGTGGTGATTCTCAACTGAAAATCTCATTTCTGAAGTTGTCA  
GAAGAAATGATGTCATCATCAGTACAGCACAGATCCTTGAGAATTCAGTGTAAATGCAGC  
CAAAGAAGATGAAGAAGGTGTCCACTTATCAGATTTTTCACTTATCATTATCGATGAGTGTC  
ATCACACTCAAAGGAAGGTGTCTACAACAATATAATGCGACGTTACTTAAAAGAAAAGATG  
AAGAACAGGAAGCTGGCAAAAGAAAACAAACCACTGATCCCGCAGCCTCAGATTCTGGGA  
CTTACAGCCTCACCTGGTGTAGGCGGTGCAACATCCTACTCAAAGCTGAAGAACATATTC  
TGAAAATCTGTGCCAATCTTGATGCATGTAGAATCATGACTGTTGAAGAGCATGCCTCCCA  
GCTGAAGAATCAGGTGAAGGAACCATATAAGAAGACTGTGATTGCAGATGACAAGAGAAG  
GGATCCATTTAGAGAGAGAATTACTGAGATCATGACAGGCATTCAAACCTATTGCCAGCTC  
CATCCAAAATCTGAGTTTGGAACTCAGCCATATGAACAGTGGGTGATCAGAGAAGAAAGGA  
AAGCTGCAAAAGAAGAAAAACGCAAGGAACGTGTCTGTGCAGAGCACTTGAAGAAATACAA  
TGATGCTCTCCAGATAAATGACACCATCCGAATGGTGGATGCGTACAATCACCTAAATAAC  
TTTTATAAGGAGGAGAAAAGTAAGAAGATGGTAAGGAGTGATGATGATGATGAACCAGCAG

TATCAAAACAGGATGAAACAGATGAATTTCTAATAGGTTTATTTTCATGCAAAAAAGAAACAG  
CTGAAAGAGTTGGCTAGAAAACCAGAATATGAAAATGAGAAGCTAATACAGTTGCGAAACA  
CTTTAATGGAGGAGTTCACGAAGACTGAAGAACCTAGAGGAATTATTTTCACAAAGACTCG  
GCTAAGTGCTTTTGGCTCTATTCCAGTGGATTAAGGATAACCCAAAATTTGAAGAAGTGGGAA  
TTAAGGCCCATATCTTATCGGTGCTGGACATAACAGTGAAATTAACCCATGACTCAGAAT  
GAGCAAAGGGAAGTTATTGATAAATTCCGAGGTGGAAATGTAAATTTACTTATTGCTACTAC  
TGTAAGCTGAGGAAGGCCTAGATATCAAAGAGTGTAACATCGTTATTAGCTATGGCCTCATC  
ACCAATGAAATTGCTATGGTGCAGGCTCGTGGTCGAGCTCGAGCTGATGAGAGCACCTAT  
GCACTTGTGGCTTCAAGTGGCTCAGGAGCTGTTGAACGTGAAGATGTTAATATTTTCCGTG  
AGAAAATGATGTATAAGGCCATTACGCGTGTCCAGAAGATGCCGCAGGAAGAGTATTTAAA  
GAAGATTGATAATTTCCAGTGGCAAAGTATAGTAGAAAAACAAATGAAGGCAAAGAGAGAT  
CAGTGCAAGCCATACAAGAAAAATCCTTCACTAATAACATTCTTATGCAAAAATTGCCACAA  
GCTGATATGTTCTGGAGAAGACATACAAGTTATTGAAAAGATGCATCATGTCAGTGTGAAAA  
AAGACTTCCAAAGTCTTTACCATACAAGAGAAAAATAAGACACTGCAAGATAAACATGCCGAT  
TACCAGACAAATGGAGAAATTATATGTAAAGATTGTGGACAAGCTTGGGGAAATATGATGG  
TTCACCGAGGTCTCGACCTGCCTTGTCTAAAGATTAGAAATTTTGTGGTTGTGTTTGAAGAC  
AAGAAAACAACAAAGCAAATTTTAAAGAAATGGGGAGAACTGCCCATCATGTTCCCTAGTTT  
TGATTATGCAGCTCATTGTCTTCAAGCGATGAAGAT

>strix\_occidentalis-strigiformes-mda5

ATGGCGAAGGAGTCCCGAGACGAGCGATTCTCTACATGATCTCCTGCTTCAGGCCGCGG  
CTGAAGCAGTTCATCCGGGTGCAGCCGGTGCTGGACCAGCTTCCCTCGCTGAGCGCGGA  
GGAGAGGGGAGAAGGTGCGGGGCGGCCGCCCTGCAGCGGGGCGAGGTGGAGGGGGCGGA  
GGAGCTGCTGCGGGCCGTGGAGCGGGGCCCGCGGGTGCAGCTGGTTCCACGAGTTC  
CTGCAGGCGCTGGAGCACGGCGGCTGCAGCCTGGCCGCCTGCTACGTGAACCCAGCCT  
CAGCCAGCTGCCCTCGCCGGCCGAGGAGGCCGACCACGACCTCTGTGTGCAATTGGTGC  
AGCTGCTCCACAGCACGCTGGTGGATAGAATGCAGACGATGCAGGTGGCCGAGAAGTGC  
CTAGAGATGGGCATCTTCCAGGACGAGGACATGGACCGGATCCACGCTGTTACTGACAAT  
CGTGGGAACAGAGAGGGTGCAAGGGAGCTATTGAGCAGAATAGTGCAGAAGAAAGATTGG  
TTCTCTCCTTTTTTATTGCTCTGCGTGAACCCAAACATGGAAGCCTTGCAGATGATTTAAG  
TGGAATAACAGGAGGAACAGAGAATAGACAAAATGGGATGAAGAACTGTACAAACGAAGAA  
ACAGAAGTTGCAAGCCAACCAGGATATGCTGTAGTAGAGGACTTGAAACAGCAAGAAAATG  
TGAATGATAGTTTCAGCAGTGAGAACAGTGTGTTTGGAAACATCTGTTGGAAAGAATTCTGTA  
GTTTCAGAGTCAGATGTCTCCTTAGGAGATGGAAGTGTGAGTAACTTGGATGAAAACCTGG  
GACAGAGCTGCACAACCAGCGATACAGATGAAGATGAAGTGGAGAGCAGAGCTTCACCTG  
AGCCAGATCTGATCCTGAGAGATTACCAGATGGAAGTTGCAAAGCCAGCACTGAATGGGG  
AGAATATTATCATATGTCTCCCTACAGGCAGTGGTAAAACCAGAGTGGCTGTTTATATTACC  
AAAGATCACTTGGATAAGAAGAAAAAGAGCATCAGAGCCCGGAAAAGTTATAGTACTTGTTA  
ATAAGGTACCACTGGTAGAACAACATTTACGAAAGGAGTTTACTCCATTCTGAAGCGTTG  
GTATCAGGTTATTGGTTTAAAGTGGTGATTCTCAACTGAAAATCTCATTTCTGAAGTTGTCA  
GAAGAAATGATGTCATCATCAGTACAGCACAGATCCTTGAGAATTCAGTTAAATGCAGC  
CAAAGAAGATGAAGAAGGTGTCCACTTATCAGATTTTTTCACTTATCATTATCGATGAGTGT  
ATCAGACTCAAAGGAAGGTGTCTACAACAATATAATGCGACGTTACTTAAAAGAAAAGATG  
AAGAACAGGAAGCTGGCAAAGAAAAACAAACCACTGATCCCGCAGCCTCAGATTCTGGGA  
CTTACAGCCTCACCTGGTGTAGGCGGTGCAACATCCTACTCAAAAGCTGAAGAACATATTC

TGAAAATCTGTGCCAATCTTGATGCGTGGAGAATCATGACTGTCTGAAGAGCATGCCTCCCA  
GCTGAAGAATCAGGTGAAGGAACCATATAAGAAGACTGTGATTGCAGATGACAAGAGAAG  
GGATCCATTTAGAGAGAGAATTACTGAGATCATGACAGGCATTCAAACCTATTGCCAGCTC  
CATCCAAAGTCTGAGTTTGGAACCTCAGCCATATGAACAGTGGGTGATCAGAGAAGAGAGG  
AAAGCTGCAAAAAGAAGAAAAACGCAAGGAACGTGTCTGTGCAGAGCACTTGAAGAAATACA  
ATGATGCTCTCCAGATAAATGACACCATCCGAATGGTGGATGCGTACAATCACCTAAATAA  
CTTTTATAAGGAGGAGAGAAAAGTAAGAAGATGGTAAGGAGTGACGATGATGATGAACCAGCA  
GTATCAAAACAGGATGAAACAGATGAATTTCTAATAGGTTTATTTTCATGCAAAAAAGAAACA  
GCTGAAAGAGTTGGCTAGAAAACCAGAATATGAAAATGAGAAGCTAATACAGTTGCGAAAC  
ACTTTAATGGAGGAGTTCACGAAGACTGAAGAACCTAGAGGAATTATTTTCACAAAGACTC  
GGCTAAGTGCCTTTGCTCTATTCCAGTGGATTAAGGATAACCCCAAATTTGAAGAAGTGGG  
AATTAAGGCCCATATCTTATCGGTGCTGGACATAACAGTGAAATTAACCCCATGACTCAGA  
ATGAGCAAAGGGAAGTTATTGATAAATTCCGAGGTGGAAATGTAAATTTACTTATTGCTACT  
ACTGTAGCTGAGGAAGGCCTAGACATCAAAGAGTGTAAACATCGTTATTAGCTATGGCCTCA  
TCACCAATGAAATTGCTATGGTGCAGGCTCGTGGTCGAGCTCGAGCTGATGAGAGCACCT  
ATGCACTTGTGGCTTCAAGTGGCTCAGGAGCTGTTGAACGTGAAGATGTTAATATTTTCCG  
TGAGAAAATGATGTATAAGGCCATTACGCGTGTCCAGAAGATGCCGCAGGAAGAGTATTTA  
AAGAAGATTGATAATTTCCAGTGGCAAAGTATAGTAGAAAAACAAATGAAGGCAAAGAGAG  
ATCAGTGCAAGCCATACAAGAAAAATCCTTACTAATAACATTCTTATGCAAAAATTGCCAC  
AAGCTGATATGTTCTGGAGAAGACATACAAGTTATTGAAAAGATGCATCATGTGAGTGTGAA  
AAAAGACTTCCAAAGTCTTTACCATACAAGAGAAAATAAGACACTGCAAGATAAACATGCCG  
ATTATCAGACAAATGGAGAAATTATATGTAAAGATTGTGGACAAGCTTGGGGAAATATGATG  
GTTACCCGAGGTCTTGACCTGCCTTGTCTAAAGATTAGAAATTTGTGGTTGTGTTTGAAGA  
CAAGAAAACAACAAAGCAAATTTTTAAGAAATGGGGAGAACTGCCCATCATGTTCCCTAGTT  
TTGATTATGCAGCTCATTGTCCTTCAAGTGATGAAGAC

>phoenicopterus\_ruber-phoenicopteriformes-mda5

ATGGCTGAGGAGTCCCGAGACGAGCGCTTCCTCTACCTGATCTCCTGCTTCAGGCCGCGG  
CTGAAGCAGTTCATCCGGGTGCAGCCGGTGTGTTGACCAGCTTCCCTCGCTGAGCGCGGA  
GGAGAGGCAGAAGGTGCGGACGGCCGCCCTGCAGCGGGGCGAGATGGAGGGGGCGGA  
GGAGCTGCTGCGGGCCGTGGAGCGGGGGCCCCGCGGGTGCAGGCTGTTCCACGAGTTC  
CTGCAGGCACTGGAGCAGGGTGGCTGCAGCCTGGCCGCCTGCTACGTGAACCCAGCCT  
CAGCCAGCTGCCCTCGCCGGCCGAGGAAGCCGACCACGACCTCTGTGTGCACTTGGTGC  
AGCTGCTCCACAGCACACTGGTGGATAAAATGCAGACCATGCAGGTGGCCGAGAAGTGCC  
TGCAGATGGGCATCTTCCAGGACGAGGACCTGGATCGGATCCACACTGTTACCAACAATC  
ATGGGAACAGAGATGGTGCAAGGGAGCTATTGAGCAGAATAGTGAGAAGAAAGATTGGT  
TCTCTCCTTTTTTGATTGCTCTGCGTGAAACCCAACATGGAGGCCTTGCAGATGATTTAAGC  
GGAAATACAGGAGGAACAGAGAATAGAGAAAATGTGATGAAGAACAGTACAAATGAAGAAA  
TGGAAGTTACAAGCCAACCAGGATATGCTGTAGTGGAGGATTTGAAACAGCAAGAAAATGT  
GAATGATAATTTACAGCAGTGAGAACAGTGTATTGGAAACATCTGTTGGAAAGAATTCTGTAG  
TTTCAGAGTCAGATGTCTCCATAGGAGATGGAAGTGTTGATAACTTGAATGAAAACCTGGG  
ACAGAGCTGCACAACCAGTGATGCAGATGAAGATGAAGTGGAGAGCAGAGCTTCACCTGA  
GCCAGATCTGATCCTGAGAGATTACCAGATGGAAGTTGCAAAGCCAGCACTGAATGGGGA  
GAATATTATAATATGTCTCCCTACAGGCAGTGGTAAAACAGAGTGGCTGTTTACATTACCA  
AAGATCACTTGGATAAGAAGAGAAGAGCATCAGAGCCTGGAAAAGTTATAGTACTTGTTAA



TAAGGTACCGTTGGTAGAACAGCACTTACGAAAGGAGTTTAATCCATTCTGAAGCGTTGG  
TATCAGGTTACTGGTTTAAAGTGGTGATTCTCAGCTGAAAATCTCATTTCTGAAGTTGTCAG  
AAGAAATGATGTCATCATCAGTACAGCACAGATCCTTGAGAATTCATTGTTAAATGCTGTCC  
AAGAAGATGAAGAAGGTGTCCACTTATCAGATTTTTCACTCATCATTATCGATGAGTGTCTAT  
CACACTCAAAGGAAGGTGTCTACAACAATATAATGCGACGTTACTTAAAGAAAAGAAGAA  
GAACAGGAAGCTGGCAAAAGAAAACAAACCACTGATCCACAGCCTCAGATTCTGGGACTT  
ACAGCTTCACCTGGTGTAGGAGGTGCAACATCCAACCTCAAAGCAGAAGAACATATTCTGA  
AAATCTGTGCCAATCTTGATGCACGTAGAATCATGACTGTTAAAGAGCATGCCTCCCAATTG  
GAGAATCAGGTGAAGGAACCATATAAGAAGACTGTCATTGCAGATGACAAAAGAAGGGATC  
CATTTAGAGAGAGAATTACTGAGATCATGACACACATTCAAACCTATTGCCAGCTCCATCCC  
AAATCGGAGTTTGGAACTCAGCCATATGAACAGTGGGTGATTAGAGAAGAGAGAAAAGCTG  
CAAAAGAAGAAAAACGCAAGGAACGTGTCTGTGCAGAACACTTGAAGAAATACAATGATGC  
TCTCCAGATAAATGACACCATCCGAATGGTGGATGCGTACAATCACCTAAATAACTTCTATA  
AGGAGGAGAAAAGTAAGAAGACAGTAAGGAGTGATGATGATGATGAACCACCAGTATCAAA  
ACAGGATGAAACAGATGAATTTCTAATAGGTTTATTTTCATGCAAAAAAGAAACAGCTGAAAG  
AGTTGGCTAGAAAGCCAGAATATGAAACGAGAAGCTAATACAGTTGCGAAACACTTTAAT  
GGAGGAGTTCACGAAGACTGAGGAACCGAGAGGAATTATTTTCACAAAGACTCGGCTAAG  
TGCCTTTGCTCTATTCCAGTGGATTAAGGATAACCCAAAATTTGAAGAAGTGGGAATTAAGG  
CCCATTATCTTATTGGTGCTGGACATAACAGTGAAATTAACCCATGACTCAGAATGAGCAA  
AGGGAAGTCATTGATAAATTCCGAGATGGACGTATAAATTTACTTATTGCTACTACTGTAGC  
TGAAGAAGGCCTAGACATCAAAGAGTGTAACATCGTTATTTCGCTATGGCCTCGTCACCAAT  
GAAATTGCTATGGTGCAGGCTCGCGGTGAGCTCGAGCTGATGAGAGCACCTATGCACTT  
GTGGCTTCGAGTGGCTCAGGAGCTGTTGAACGTGAAGATGTTAATATTTTCCGTGAGAAAA  
TGATGTATAAGGCCATTACGCGTGTCCAGAACATGCCACAGGAAGAGTATTTAAATAAGAT  
TCAGAATTTCCAGTTGCAAAGTATAGTGGAACAAATGAAGGCAAAGAGAGATCAGTCC  
AAGACATACAAGAAAAATCCTTCACTAATAACATTCTATGCAAAAATTGCCACAAGCTGAT  
ATGTTCTGGAGAAGACATTCAAGTTATTGAAAACATGCATCATGTGAGTGTGAAAAAGATT  
TCCAGAGTCTTTACCATACAAGAGAAAATAAGACACTGCAAGATAAGCATGCCGATTACCA  
GACAAATGGGGAAATTATATGTAAAGATTGTGGACAAGCTTGGGGAAATATGATGGTTCAC  
CGAGGTCTTGACCTGCCTTGTCTAAAGATTAGAAATTTTGTGGTTGTGTTGGAAGACAAGA  
AAACAAAAAAGGAAATTTTTAAGAAATGGGCAGAACTGCCCATCAGGTTTCCTAGTTTTGAT  
TATGCAGCTCATTGTCCTTCAAGTGATGAAGAT

>chlamydotis\_macqueenii-gruiformes-mds5

ATGGCAGCCCAATCTCGGGACGAGCGCTTCTCTACATGATCTCCTGCTTCAGGCCGCGG  
CTGAAGCAGTTCATCCGTGTGCAGCCGGTGTGATCGGCTTCCCTCGCTGAGCGCCGA  
GGACAGGGAGAAGGTGCGGGTGGCCGCCCTGCAGCGGGGCGAGGTGGAGGGGGCGGA  
GGAGCTGCTGCGGGCCGTGGAGCGGGGGCCCCGCGGGTGCAGGCTGTTCCACGAGTTC  
CTGCAGGCGCTGGAGCACGGCGGCTGCAGCCTGGCCGCCTGCTACGTGAACCCAGCCT  
CAGCCAGCTGCCCTCGCCGGCCGAGGAGGCCGACCAGACCTCTGCGTGCATTGGTGC  
AGCTGCTCCACAGCACGCTGGTGGACAAAATACAGAGCGTGCAGGTGGCTGAGAAGTGC  
CTGCAGATGGGCATCATCCAGGAGGAAGACCTGGATCGGATCCACACTGTAAGTACAAT  
CATGGTAACAGAGATGGTGCAAGGGAGCTACTGAGCAGAATAGTGAGAAGAAAGATTGG  
TTCTCTCTTTTTTATTGCTCTGCGTGAAACCCAACATGGAAGCCTTGCAGATGACTTAAG  
CGGAAATACAGGAGGAACAGAGAACAGACAGAATGAGATG---

AACAGTACAAACGAAGAAACAGAAGTTACAAGCCAACCAGAATACGCTGTAGTGGAGGATT  
TGAAACAGCAAGAAAATGTGAATGATAGTTTCAACAGTGAGAACAGTGTATTGGAAACATCT  
ATTGGAAAGAATTCTGTAGTTTCAGAGTCAGATGTCTCCATAGGAAATGGAAGCATCAGTTA  
CTTGAATGAAAACCTGGGACAGAGCTGCACAACCAGT---  
TCAGATGAAGATGAAGTGGAGAGCAGAGCTTCCCCTGAGCCAGATCTGATCGTGAGAGAT  
TACCAGATGGAAGTTGCAAAGCCAGCACTGAATGGGGAGAATATTATAATATGTCTCCCTA  
CAGGCAGTGGTAAACTAGAGTGGCTGTTTACATTACCAAAGATCACTTGGATAAGAAGAA  
AAGAGCATCAGAGCTTGGAAAAGTTATAGTACTTGTTAATAAGGTACCATTGGTGGAACAA  
CATTTACGAAAGGAGTTCAATCCATTCTTGAAGCATTGGTATCAGGTTATTGGTTTAAGTGG  
TGATTCTCAGCTGAAAATCTCATTTCCTGAAGTTGTCAGAAGAAATGATGTCATAATCAGTA  
CAGCACAGATCCTTGAGAATTCAGTGTAAATGCAGCCGAAGAAGGTGAAGAAGGTGTCCA  
CTTATCAGATTTTTTCACTCATCATTATTGATGAGTGTATCACACTCAAAGGAAGGTGTCT  
ACAACAATATAATGCGACGTTACTTAAAAGAAAAGATGAAGAACAGGAACTGGCAAAAGA  
AAACAAACCACTGATCCACAGCCTCAGATTTTGGGACTTACAGCCTCACCTGGTGTAGGA  
GGTGCAACATCCTACTCAAAGCTGAAGAACATATTCTGAAAATCTGTGCCAATCTTGATGC  
ATGTAGACTCATGACTGTTGAAGAGCATGCCTCCCAATTGAAGAATCAGGTGAAGGAACCA  
TATAAGAAGACTGTGATTGCAGATGACAAAAGAAGGGATCCATTTAGAGAGAGAATTACTG  
AGATCATGACAGACATTCAAACCTATTGCCAGCTCCATCCAAAATCTGAGTTTGGAACTCAG  
CCATATGAACAGTGGGTAATTAGAGAAGAGAGAAGAGCTGCAAAAGAAGAGAAACGCAAG  
GAACGCGTCTGTGCAGAACACTTGAAGAAATACAATGATGCTCTCCAGATAAATGATACCA  
TCAGAATGGTGGATGCATACAATCACCTAAATAACTTTTATAAGGAGGAGAAAAGTAAGAAG  
ACAGTAAGGAGTGATGATGATGATGAACCAGCAGTATCAAACAAGATGAAACAGATGAAT  
TTCTAATAGGATTATTTAATGCAAAAAGAAACAGCTGAAAGAGTTGGCTAGAAAGCCAGAA  
TATGAAAATGAGAAGCTAATACAGTTGCGAAACACTTTAATGGAGGAGTTCACGAAGACTG  
AGGAACCTAGAGGAATTATTTTCACAAAGACTCGTCTAAGTGCCTTTGCTCTATTCCAGTGG  
ATTAAGGATAACCCAAAATTTGAAGAAGTGGGAATTAAGGCCATTATCTTATTGGTGCTGG  
ACATAACAGTGAAATTAACCCATGACTCAGAATGAGCAAAGGGAAGTTATTGATAAATTCC  
AAGGTGGAAATGTAAATTTACTTATTGCTACTACTGTAGCTGAGGAAGGCCTAGACATCGA  
AGAATGTAACATCGTTATTTCGCTATGGCCTTGTCACCAATGAAATTGCTATGGTGCAGGCT  
CGTGGTCGAGCTCGAGCTGATGAGAGCACCTATGCACTTGTGGCTTCAAGTGGCTCAGGA  
GCTGTTGAACGTGAAGATGTTAATATTTTCCGTGAGAAAATGATGTATAAGGCCATTACGCG  
CGTCCAGAAGATGCCAAAGGAAGAGTATTTAAATAAGATTGAGAATTTCCAGTTGCAAAGTA  
TAGTGGAACAAATGAAGGCAAAGAGAGATCAACGCAAGACATACAAGAAAAATCCTTC  
ACTAATAACATTCTATGCAAAAATTGCCACAAGCTGATATGTTCTGGAGAAGACATACAAG  
TTATTGAAAACATGCATCATGTCAGTGTGAAAAAGATTTCCAAAGTCTTTACCATACAAGA  
GAAAATAAGACACTGCAAGATAAGCATGCCGATTACCAGACAAATGGGGAAATTATATGTA  
AAGATTGTGGACAAGCTTGGGGAAATATGATGGTTCACCGAGGTCTTGACCTGCCATGTCT  
AAAGATTAGAAATTTTGTGGTTGTGTTTGAAGACAAGAAAACAACAAAGCAAATTTTAAAGA  
AATGGGGAGAAGCTGCCTGTCAGGTTCCCTAGTTTTGATTATGCAGCTCATTGTCCTTCAAG  
TGATGAAGAT

>tetrax\_tetrax-gruiformes-md5

ATGGCAGCCGAATCCCGGGACGAGTGCTTCCTCTACATGATCTCCTGCTTCAGGCCGCGG  
CTGAAGCAGTTCATCCGGGTGCAGCCGGTGCTGGATCTCCTTCCCTCGCTGAGCGCCGAG  
GACAGGGAGAAGGTGCGGGCGGCCGCCCGGCAGCGGGGCGAGGTGGAGGGGGCGGAG

GAGCTGCTGCGGGCCGTGGAGCGGGGGCCCCGCGGATGCGGCTGGTTCCACGAGTTCC  
TGCAGGCGCTGGAGAACGGCGGCTGCAGCCTGGCCGCCTGTTACGTGAACCCCAGCCTG  
AGCCAGCTGCCCTCCCCGGCCGAGGAGGCGGACCACGACCTCTGCGTGCACTTGGTGCA  
GCTGCTCCACAGCACGCTGGTGGACAAAATGCAGAGCGTGCAGGTGGCCGAGAAGTGCC  
TGCAGATGGGCATCATCCAGGAGGAAGACCTGGATCGGATCCACACCGTTACCGACAATC  
ATGGGAACAGAGATGGTGCAAGGGAGCTATTGAGCAGAATAGTGCAAGAAAGATTGGT  
TCTCTCCTTTTTTGGATTGCTCTGCGTGAAACCCAACATGGAGACCTTGCAAGTAAAGC  
GGAAATACAGGAGGAACAGAGAACAGACAGAATGGGATGCAGAACAGTACAAACGAAGAA  
ACAGAAGTTACAAGCCAACCAGAATACTCTGTAGTGGAGGATTTGGAACAGCAAGAAGATG  
TGAATGATAGTTTCAACAGTGAGAGCAGTGTATTGGAAAGATCTATTGGAAAGAATTCTGTA  
ATTTGAGAGTCAGATGACTCCATAGGAAATGGAAGTGTGAGTTACTTGAATGAAAACCTGG  
GCCAGAGCTGCACAACCAAGT---

TCAGATGAAGATGAAGTGGAGAGCAGAGCTTCACCTGAGCCAGATCTGATCCTGAGAGAT  
TACCAGATGGAAGTTGCAAAGCCAGCACTGAATGGGGAGAATATTATAATATGTCTCCCTA  
CAGGCAGTGGTAAACTAGAGTGGCTGTTTACATTACCAAAGATCACTTGGATAAGAAGAA  
AAGAGCATCAGAGCTTGGAAAAGTTATAGTACTTGTTAATAAGGTACCATTGGTGGAAACA  
CATTTACGAAAGGAGTTCAATCCATTCTTGAAGCGTTGGTATCAGGTTATTGGTTTAAAGTG  
TGATTCTCAGCTGAAAATCTCATTTCCTGAAGTTGTCAGAAGAAATGATGTCATCATCAGTA  
CAGCACAGATCCTTGAGAATTCAGTGTAAATGCAGCCGAAGAAGGTGAAGAAGGTGTCCA  
CTTATCAGATTTTTTCACTCATCATTATCGATGAGTGTATCACAACCTCAAAGGAAGGTGTCT  
ACAACAATATAATGCGACGTTACTTAAAAGAAAAGATGAAGAACAGAAAGCTGGCAAAAGA  
AAACAAACCACTGATCCACAGCCTCAGATTTTGGGACTTACAGCCTCACCTGGTGTAGGA  
GGTGCAAAATCCTACTCAAAGCTGAAGAACATATTCTGAAAATCTGTGCCAATCTTGATGC  
ATGTAGACTCATGACTGTTGAAGAGCATGCCTCCCAATTGAAGAATCAGGTGAAGGAACCA  
TATAAGAAGACTGTGATTGCAGATGACAAAAGAAGGGATCCATTTAGAGAGAGAATTACTG  
AGATCATGACAGACATTCAAACCTATTGCCAGCTCCATCCAAAATCTGAGTTTGGAACTCAG  
CCATATGAACAGTGGGTAATTAGAGAAGAGAGAAGAGCTGCAAAAGAAGAGAAACGCAAG  
GAACGTGTCTGTGCGGAACACTTGAAGAAATACAATGATGCTCTCCAGATAAATGATACCA  
TCAGAATGGTGGATGCATATAATCACCTAAATAACTTTTATAAGGAGGAGAAAAGTAAGAAG  
ACAGTAAGGAGTGATGATGATGATGAACCAGCAGTATCAAACAAGATGAAACAGATGAAT  
TTCTAATAGGATTATTTAATGCAAAAAAGAAACAGCTGAAAGAGTTGGCTAGAAAGCCAGAA  
TATGAAAATGAGAAGCTAATACAGTTGCGGAACACTTTAATGGAGGAGTTCACGAAGACTG  
AGGAACCTAGAGGAATTATTTTACAAAGACTCGGCTAAGTGCCTTTGCACTATTCCAGTG  
GATTAAGGATAACCCAAAATTTGAAGAAGTGGGAATTAAGGCCATTATCTTATTGGTGCTG  
GACATAACAGTGAAATTAACCCCATGACTCAGAATGAGCAAAGGGAAGTTATTGATAAATTC  
CGAGGTGGAAATGTAAATTTACTTATTGCTACTACTGTAGCTGAGGAAGGCCTAGACATCA  
AAGAGTGTAACATCGTTATTCGCTATGGCCTTGTCACCAATGAAATTGCTATGGTGCAGGC  
TCGTGGTTCGAGCTCGAGCTGATGAGAGCACCTATGCACTTGTGGCTTCAAGTGGCTCAGG  
AGCTGTTGAACGTGAAGATGTTAATATTTTCCGTGAGAAAATGATGTATAAGGCCATTACAG  
GTGTCCAGAAGATGCCACAGGAAGAGTATTTAAATAAGATTCAGAATTTCCAGTTGCAAAGT  
ATAGTGGAGAAACAAATGAAGGCAAAGAGAGATCAACGCAAGACGTACAAGAAAAATCCTT  
CACTAGTAACATTCTATGCAAAAATTGCCACAAGCTGATATGTTCTGGAGAAGACATACAA  
GTTATTGAAAACATGCATCATGTCAGCGTGAAAAAAGATTTCCAAAGTCTTTACCATACGAG  
AGAAAATAAGACACTGCAAGATAAGCATGCCGATTACCAGACAAATGGGGAAATCGTATGT

AAAGATTGTGGACAAGCTTGGGGAAATATGATGGTTCACCGAGGTCTTGACCTGCCTTGTCTAAAGATTAGAAATTTTGTGGTTGTGTTTGAAGACAAGAAAACAACAAAGCAAATTTTAAAGAATGGGGGAGAACTGCCCGTCAAGTTCCTAGTTTGGATTATGCAGCTCATTGTCCTTCAAGTGATGAAGAT

>egretta\_garzetta-pelecaniformes-mda5

ATGGCAGAGGAGCCCCGAGACGATCGCTTCCTCTATCTGATCGCCTGCTTCAGGCCGCGGCTGAAGCAGTTCATCCGGGTGCAGCCGGTGCTGGACCGGCTTCCTCGCTGGGCGCGGAGGAGAGGGAGAAGGTGCGGGCGGCCGCCCTGCAGCGGGGCGAGGTGGAGGCGGCGGAGGAGCTGCTGCGGGCCGTGGAGCGGGGGCCCCGCGGGTGCGGCTGTTCCACGAGTTCCTGCAGGCGCTGGAGCACGGCGGCTGCAGCCTGGCCGCCTGCTACGTGAACCCAGCCTCAGCCAGCTGCCCTCGCCAGCCGAGGAGGCCGACCACGACCTCTGCGTGCACTTGGTGCACTGCTCCACAGCACGCTGGTGGATAGAATGCAGACCGTGCAGGTGGCCGAGAAGTGCCTGCAGATGGGCATCTTCCAGGATGAGGACCTGGATCGGATCCACACTGTTACTGACAATCGTGGGAATAGAGATGGTGCAAGGGAGCTATTGAGCAGAATAGTGCAGAAGAAAGATTGGTTCTCTCCTTTTTTGATTGCTCTGCGTGAAACCCAACATGGAGACCTTGCAGATGATTTAAGTGGAATACAGGAGGAACAGAGAATAAACAAAGTGGGATGAAGAACAGTATGAATGGAGAACAGAAGTGACAAGCCGACCAGGATATGCCATAGTGGAGGATTTGAAACAGCAAGAAAATGTGAATGATAGTTTCAGCAGGGAGAGCAGTGTATTGGAAACATCTATTGGAAAGAATTCTGTCTGTTTCAGAGTCGGATGTCTCCATAGGAGATGGAAGCATCAGTAACTTGAATGAAAACCTGGGACAGAGCTGCACAACCAGTGATTGAGATGAAGATGAAGTGGAGAGCAGAGCTTCACCTGAGCCAGATCTGATCCTGAGAGATTACCAGATGGAAGTTGCAAAGCCAGCACTGAATGGGAGAAATATTATAATATGTCTCCCTACAGGCAGTGGTAAAACCAGAGTGGCTGTTTACATTACCAAAGATCACTTGGATAAGAAGAAAAGAGCATCTGAGCCTGGAAAAGTTATAGTACTTGTATAAAGGTACCACTGGTAGAACAGCATTTACGAAAGGAGTTTAATCCATTCCTGAAGCGTTGGTATCAGGTTATTGGTTTAAAGTGGTGATTCTCAGCTGAAAATCTCATTTCTGAAGTTGTCAGAAGAAATGATGTCATCATCAGTACAGCACAGATCCTTGAGAATTCAGTGTAAATGCAGCCAAAGAAGATGAAGAAGGCGTCCACTTATCAGATTTTTCACTCATCATTATCGATGAGTGTCATCACACTCAGAAGGAAGGTGTCTACAACAATATAATGCGACGTTACTTAAAAGAAAAGATGAAGAACAGGAAGCTGGCAAAAGAAAACAAGCCACTGATCCCACAGCCTCAGATTCTGGGACTTACAGCCTCACCTGGTGTAGGAGGTGCAACATCTTACTCAAAGCTGAAGAACATATCTGAAAATCTGTGCCAATCTTGATGCATGTAGAATCATGACTGTTGAAGAGCATGCCTCCCAATTGAAGAATCAGGTGAAGGAACCATATAAGAAGACTGTGATTGCAGATGACAAAAGAAGGATCCATTTAGAGAGAAAATTACTGAGATCATGACAGACATTCAAACCTATTGCCAGCTCCATCCAAAATCTGAGTTTGGAACCTCAGCCATATGAACAGTGGGTGATTAGAGAAGAGAGAAAAAGCTGCAAAAAGAAGAAAAACGCAAGGAACGTGTTTGTGCAGAACACTTGAAGAAATACAACGATGCTCTCCAGATAAATGACACCATCCGAATGGTGGATGCATACAATCACCTAAATAATTTTATATAAGAGGAGAAAAAGTAAGAAGGCAGTAAGGAGTGATGATGATGATGAACCAGCAGTATCAAACAGGATGAAACAGATGAATTTCTAATACATTTATTTCAAGCAAAAAAGAAAAAGCTGAAAGAGTTGGCTAGAAAGCCAGAATATGAAAATGAGAAGCTAATACAGTTGCGAAACACTTTAATGGAGGAGTTCACGAAGACTGAGGAACCTAGAGGAATTATTTTACAAAGACTCGGCTAAGTGCTTTTGTCTATTCCAGTGGATTAAGGATAATCCAAAATTTGAAGAAGTGGGAATTAAGGCCATTATCTTATTGGTGCTGGACATAACAGTGAAATTAACCCATGACTCAGAATGAGCAAAGGGAAGTTATTGATAAATTCGAGGTGAAATGTAAATTTACTTATTGCTACTACTGTAGCTGAGGAAGGCCTAGACATCAAAGAGTGCAACATCGTTATTCGCTATGGCCTTGTAC

CAATGAAATTGCTATGGTGCAGGCTCGCGGTCTGAGCTCGAGCTGATGAGAGCACCTATGC  
ACTTGTGGCTTCGAGTGGCTCGGGAGCTGTTGAACGTGAAGATGTTAATATTTTCCGTGAA  
AAAATGATGTATAAGGCCATTGAGAGTGTCCAGAAGATGCCACAGGAAGAGTATTTAAATA  
AGATTCATAATTTCCAGTTGCAAAGTATAGTGGAAAAACAAATGAAGGCAAGGAGAGATCA  
GCACAAGACGTACAAGAAAAATCCTTCACTAATAACATTCTTATGCAAAAATTGCCACAAGC  
TGATATGTTCTGGAGATGACATACAAGTTATTGAAAACATGCATCATGTCAGCGTGAAAAAA  
GATTTCCAAAGTCTTTACCATACGAGGGGAAAATAAGACACTGCAAGATAAGCATGCCGATT  
ACCAAACAAACGGGGAAATTATATGTAAAGATTGTGGACAAGCTTGGGGAAATATGATGGT  
TCACCGAGGTCTTGACCTGCCTTGTCTGAAGATTAGAAATTTTGTGGTTGTGTTTGAAGACA  
AGAAAACAACAAAGCAAATTTTAAAGAAATGGGGAGAACTGCCCATCAGGTTCCCTAGTTTT  
GATTATGCAGCTCATTGTCCTTCAAGTGATGAAGAT

>chungaburmeisteri-gruiformes-mda5

ATGGCAGACGGGTCCCGGGACGAGCGCTTCTCTACATGATCTCCTGCTTCAGGCCGCG  
GCTGAAGCAGTTCATTGCGGTGCAGCCGGTGTGGACCGGCTCCCTCGCTGAGCGCGG  
GGGACAGGGAGAAGGTGCGGGCGGCTGCCCTGCAGCGCGGCGAGGTGGAGGGGGCGG  
AGGAGCTGCTGCGGGCCGTGGAGCGGGGGCCCCGCGGGTGCGGCTGTTCCACGAGTT  
CCTGCAGGCGCTGGAGCACGGTGGCTGCAGCCTGGCCGCTTGCTACGTGAACCCAGCC  
TCAGCCATCTGCCCTCGCCGGCCGAGGAGGCCGACCACGACCTCTGCGTGCACCTTGGTG  
TATCTGCTCCACAGCACACTGGTGGATAAAATGCAGACCACGCAGGTGGCCGAGAAGTGC  
CTGCAGATGGGCATCTTCCAGGACGAGGACTTGATCGGATCCACACTGTTACTGACAAT  
CGTGGGAACAGAGATGGTGCAAGGGAGCTATTGAGCAGAATAGTGCAGAAGAAAGACTGG  
TTCTCTCCTTTTTTGATTGCTCTGCGTGAAACCCAACATGGAGACCTTGAGATGATTTAAG  
CGGAAATACAGGAGGAGCAGAGAATAGACCAAATGAGATGAAGAACAGTAGAAATGAAGA  
AACAGAAGTTACAAGCCAACCAGGATATGCTGTATTGGAGGATCTGAATCAGCAAGAAAAT  
ACGAATGATAGTTTCAGCAGTGAGAACAGTGTATTGGAAACATCTATTGGAAAGAATTCTGT  
AGTTTCAGAGTCAGATGTCTCCATAGGAGATGAAAGTGTGAGTAACCTGAATGAAAACCTG  
ACACAGAGCTGCACAACCAGTGATTCCGATGAAGATGAAGTGGAGAACAGAGCTTCACCT  
GAGCCAGATCTGATCCTGAGAGATTACCAGATGGAAGTTGCAAAGCCAGCACTGAATGGG  
GAGAATATTATAATATGTCTCCCTACAGGCAGTGGTAAAACCAGAGTGGCTGTTTACATTAC  
CAAAGATCACTTGAGATAAGAAGAAAAGAGCATCAGAGCCTGGAAAAGTTATAGTACTTGTT  
AATAAGGTACCATTGGTAGAACAGCATTTACGAAAGGAGTTTAATCCATTCTGAAGCGTTG  
GTATCAAGTTATTGGTTTAAGTGGTGATTCTCAGCTGAAAATCTCATTTCTGAAGTTGTCA  
GACGGAATGATGTCATCATCAGTACAGCACAGATTCTTGAGAATTCAGTGTAAATGCAGC  
CAAAGAAGATGAAGAAGGTGTCCACTTATCAGATTTTCACTCATCATTATCGATGAGTGC  
ATCACACTCAAAGGAAGGTGTCTACAACAATATAATGCGACGTTATTTAAAAGAAAAGATG  
AAGAACAGGAAGCTGGCAAAAGAAAATAAACCCTGATCCACAGCCTCAGATTCTGGGAC  
TTACAGCCTCACCTGGTGTAGGAGGTGCAACATCCTACTCAAAGCTGAAGAACACATTCT  
GAAAATCTGCGCCAATCTTGATGCATGTAGGATCATGACTGTTGAAGAGCATGCCTCTCAA  
TTGAAGAATCAGGTGAAGGAACCATATAAGAAGACTGTGATTGCAGATGACAAAAGGAAGG  
ATCCATTTAGAGAGAGAATTACTGAGATCATGACAGACATTCAGAACTATTGCCAGCTCCAT  
CCAAAATCTGAGTTTGGAACTCAGCCATATGAACAGTGGGTGATTAGAGAGGAGAGAAGA  
GCTGCAAAAGAAGAAAAACGTAAGGAACGTGTCTGTGCAGAACTTGAAGAAATACAATG  
ATGCTCTCCAGATAAATGACACCATCCGAATGGTGGATGCATACAATCACCTAAATAACTTT  
TATAAGGAGGAGAAAAAGTAAGAAGACAGTAAGGAGTGATGATGATGATGAACCGGCAGTAT

CAAAACAGGATGAAACAGATGAATTTCTAATAAATTTATTTAATTCAAAAAAGAGACAGCTGA  
AAGAGTTGGCTAGAAAGCCAGAATATGAAAATGAGAAGCTAATACAGTTGCGAAACACTTT  
AATGGAGGAGTTCACGAAGACTGAGGAACCTAGAGGAATTATTTTCACAAAGACTCGGCTA  
AGTGCCTTTGCTCTGTTCCAGTGGATTAAGGATAACCCAAAATTTGAAGAAGTGGGAATTAA  
GGCCATTATCTTATCGGTGCTGGACATAACAGTGAAATTAAACCCATGACTCAGAATGAG  
CAAAGGGAAGTTATTGATAAATCCGAGGTGGAAATATAAATTTACTTATTGCTACTACTGT  
AGCTGAGGAAGGCCTAGACATCAAAGAATGTAACATCGTTATTGCTATGGCCTCGTCACC  
AATGAAATTGCTATGGTGCAGGCTCGCGGTCGAGCTCGAGCTGATGAAAGCACCTATGCA  
CTTGTGGCTTCAAGTGCCTCAGGAGCTGTTGAACGTGAAGATGTTAATTTTTCCGTGAGA  
AAATGATGTATAAGGCCATTACGCGTGTCCAGAAGATGCCACAGGAAGAGTATTTAAATAA  
GATTCAGAAATTTCCAGTTGCAAAGTATAGTGGAACAAATGAAGGCAAAGAGAGATCAG  
CACAAGACATACAAGAAAAATCCTTCACTAATAACATTCTATGCAAAAATTGCCACAAGCT  
GATATGTTCTGGAGAAGACATACAAGTTATTGAAAACATGCATCATGTCAGTGTGAAAAAG  
ATTTCCAAAGTCTTTACCATACAAGAGAAAAATAAGACACTGCAAGATAAACATGCCGATTAC  
CAGATAAATGGGGAAATTATATGTAAAGATTGTGGACAAGCTTGGGGAAATATGATGGTTC  
ACCGAGGTCTTGACCTGCCTTGTCTAAAGATTAGAAATTTTGTGGTTGTGTTTGAAGACAAG  
AAAACAACAAAGCAAATTTTTAAGAAATGGGGGAGAACTGCCTGTCAGGTTCCCTAGTTTTGA  
TTATGCAGCTCATTGTCCTTCAAGTGATGAAGAT

>aptenodytes\_patagonicus-sphenisciformes-mda5

ATGGCAGAGGAGTCCCGAGACGAGCGCTTCCTCTACCTGATCTCCTGCTTCAGGCCGCGG  
CTGAAGCAGTTCATCCGGGTGCAGCCGGTGCTGGACCTGCTTCCCTCGCTGAGCGCTGG  
GGACAGGGAGAAGGTGCGGGCGGCCGTGCTGAATCGGGGCGAGGTGGAGGGGGCGGA  
GGAGCTGCTGCGGGTCGTCGAGCGGGGGCCCCGCGGGTGCGGCTGGTTCCACGAGTTC  
CTGCAGGCGCTGGAGCACGGTGGCTGCAGCCTGGCCGCCTGCTACGTGAACCCAGCCT  
CAGCCAGCTGCCCTCGGCGGCCGAGGAGGCGGACCATGACCTCTGCGTGCACCTGGTGC  
AGCTGCTCCACGGCACACTGGTGGATAGAATGCAGACCATGCAGGTGGCTGAGAAGTGTC  
TGCAGATGGGCATCTTCCAGGACGAGGACCTGGATCGGATCCACACTGTTACTGACAATC  
GTGGGAACAGAGATGGTGCAAGGGAGCTATTGAGCAGAATTGTGCAGAAGAAAGATTGGT  
TCTCTCCTTTTTTGATTGCTCTGCGTGAAACCCAACATGGAGGCCTTGCAAGATGATTTAAGC  
GGAAATACAGGAGGAACAGAGAATAGACAAAATGAGATGAAGAACAGTACAAATGAAGAAA  
CGGAAGTTACAAGCCAACCAGGATATGCCATAGTGAGGATCTGAAACAGCAAGAAAATGT  
GAATGATAGTTTTAGCAGTGAGAACAGTGTATCGGAAACATCTATTGGAAAGAATTCTATG  
GTTTCAGAGTCAGATGTCTCTACAGGAGATGGAAGTGTCAATAACTTGAATGAAAACCTGG  
GACAGAGCTGCACAACCAAGTGATTCAGATGAAGATGAAGTGGAGAGCAGAGCTTCACCTG  
AGCCAGATCTGATTCTGAGAGATTACCAGATGGAAGTTGCAAAGCCAGCACTGAATGGGG  
AGAATATTATAATATGTCTCCCTACAGGCAGTGGTAAAACCAGAGTGGCTGTTTACATTACC  
AAAGATCACTTGGATAAGAAGAAAAGAGCATCAGAGCCTGGAAAAGTTATAGTACTTGTTAA  
TAAGGTACCATTGGTAGAACAGCATTTACGAAAGGAGTTTAATCCATTCTGAAGCGTTGG  
TATCAGGTTATTGGTTTAAAGTGGTGATTCTCAGCTGAAAATCTCATTTCCTGAAGTTGTCAA  
AAGAAATGATGTCATCATCAGTACAGCACAGATCCTTGAGAATTCAGTGTAAATGCAGCC  
GAAGAAGATGAAGAAGGTGTCCACTTATCAGATTTTTCACTCATCATTATCGATGAGTGTCA  
TCACACCCAAAAGGAAGGTGTCTACAACAATATAATGCGACGTTACTTAAAAGAAAAGATGA  
AGAACAGGAAGCTGGCAAAAGAAAACAAACCACTGATCCCACAGCCTCAGATTCTGGGAC  
TTACAGCCTCACCTGGTGTAGGAGGTGCAACATCCTACTCAAAGCTGAAGAACATATTCT

GAAAATCTGTGCCAATCTTGATGCATGTAGAATCATGACTGTTGAAGAGCATGCCTCCCAG  
TTGAAGAATCAGGTGAAGGAACCGTATAAGAAGACTGTGATTGCGGATGACAAAAGAAGAG  
ATCCATTTAGAGAGAGAATTACCAAGATCATGACAGACATTCAAAACTATTGCCAGCTCCAT  
CCAAAATCTGAGTTTGGAACCTCAGACATATGAACAGTGGGTGATTAGAGAAGAGAGAAAAG  
CTGCAAAAAGAAGAAAAACGCAAGGAACGTGTCTGTGCAGAACACTTGAAGAAATACAATGA  
TGCTCTCCAGATAAATGACACCATCCGAATGGTGGATGCGTACAATCACCTAAATAATTTTT  
ATAAGGAGGAGAGAAAAGTAAGAAAACAGTAAAGAGTGATGATGATGATGAACCAGCAGTATC  
AAACAGGATGAAACAGATGAATTTCTAATAGGTTTATTTTCATGCAAAAAAGAAACAGCTGA  
AAGAATTGGCTAGAAAGCCAGAATACGAAAATGAGAAGCTAATACAGCTGCGAAACACTCT  
AATGGAGGAGTTCACGAAGACTGAGGAACCTAGAGGAATTATTTTCACAAAGACTCGGCTA  
AGTGCCTTTGCTCTATTGCAGTGGATTAAGGATAACCCAAAATTTGAAGAAGTGGGAATTAA  
GGCCAGTTATCTTATTGGTGCTGGACACAACAGTGAAATTAAACCCATGACTCAGAATGAG  
CAAAGGGAAGTTATTGATAAATTCGAGGTGGAATGTAAATTTACTTATTGCTACTACTGT  
AGCTGAGGAAGGCCTAGACATCAAAGAGTGTAACATCGTTATTTCGCTATGGCCTCGTCACC  
AATGAAATTGCTATGGTGCAGGCTCGCGGTCGAGCTCGAGCTGATGAGAGCACCTATGCA  
CTTGTGGCTTCGAGTGGCTCAGGAGCTGTTGAACGTGAAGATGTTAATATTTTCCGTGAGA  
AAATGATGTATAAGGCCATTCAGCGTGTCCAGAAGATGCCACAGGAAGAGTATTTAAATAA  
GATACAGAATTTCCAGTTGCAAAGCATAGTGGA AAAACAAATGAAGGCAAAGAGAGATCGG  
CACAAGACATACAAGAAAAATCCTTCACTAATAACATTCCCTATGCAAAAATTGCCACAAGCT  
GGTATGTTCTGGAGAAGACATACAAGTTATTGAAAACATGCATCATGTCAAGTGTA AAAAAG  
ATTTCCAAAGTCTTTACGATACAAGAGAAAATAAGACACTGCAAGATAAGCATGCCGATTAC  
CAGACAAATGGGGAAATTATATGTAAACATTGTGGACAAGCTTGGGGAAATATGATGGTTC  
ACCGAGGTCTTGACCTGCCTTGTCTAAAGATTAGAAATTTTGTGGTTGTGTTTGAAGACAAG  
AAAACAACAAAGCATATTTTTTAAGAAATGGGGAGAAGCTGCCCGTCAGGTTCCCTAGTTTCG  
ATTATGCAGCTCATTGTCCTTCAAGTGATGAAGAT

>pygoscelis\_adeliae-sphenisciformes-mda5

ATGGCAGAGGAGTCCCGAGACGAGCGCTTCCTCTACYTGATCTCCTGCTTCAGGCCGCGG  
CTGAAGCAGGTCATCCGGGTGCAGCCGGTGCTGGACCTGCTTCCCTCGCTGAGCGCTGG  
GGAGAGGGAGAGGGTGCGGGCGGCCGCGCTGCAGGGGGGCGAGGTGGAGGGGGCGGA  
GGAGCTGCTGCGGGTCGTCGAGCGGGGGCCCCGCGGGTGCGGCTGGGTCCACGAGTTC  
CTGCAGGCGCTGGAGTACGGTGGCTGCAGCCTGGCCGCCTGCTACGTGAACCCACGCCT  
CAGCCAGCTGCCCTCGGCGGCCGAGGAGGCGGACCATGACCTCTGCGTGCACCTTGGTGC  
AGCTGCTCCACAGCACGCTGGTGGACAGAATGCAGACCATGCAGGTGGCTGAGAAGTGC  
CTGCAGATGGGCATCTTCCAGGACGAGGACCTGGATCGGATCCACACTGTTACTGACAAT  
CGTGGGAACAGAGATGGTGCAAGGGAGCTATTGAGCAGAATTGTGCAGAAGAAAGATTGG  
TTCTCTCCTTTTTTGATTGCTCTGCGTGAAACCCAACATGGAGGCCTTGCAAGATGATTTAAG  
CGGAAATACAGAAGGAACAGAGAATAGACAAAATGAGATGAAGAACAGTACAAATGAAGAA  
ACGGAAGTTACAAGCCAACCAGGATATGCCACAGTGGAGGATCTGAAACAGCAAGAAAAT  
GTGAATGATAGTTTCAGCAGTGAGAACAGTGTATCGGAAACTTCTATTGGAAAGAATTCTAT  
AGTTTCAGAGTCAGATGTCTCCACAAGAGATGGAAGTGTCAAGTAACCTGAATGAAAACGTG  
GGACAGAGCTGCACAACCAGTGATTCAGATGAAGATGAATTGGAGAGTAGAGCTTCACCT  
GAGCCAGATCTGATCCTGAGAGATTACCAGATGGAAGTTGCAAAGCCAGCACTGAATGGG  
GAGAATATTATAATATGTCTCCCTACAGGCAGTGGTAAAACCAGAGTGGCTGTTTACATTAC  
CAAAGATCACTTGGATAAGAAGAAAAGAGCATCAGAGCCTGGAAAAGTTATAGTACTTGTT

AATAAGGTACCATTGGTAGAACAGCATCTACGAAAGGAGTTTAATCCATTCTGAAGCGTT  
GGTATCAGGTTATTGGTTTAAGTGGTGATTCTCAGCTGAAAATCTCATTTCTGAAGTTGTC  
AGTAGAAATGATGTCATCATCAGTACAGCACAGATCCTTGAGAATTCAGTGTTAAATGCAGC  
CGAAGAAGATGAAGAAGGTGTCCACTTATCAGATTTTTCTACTCATCATTATCGATGAGTGTC  
ATCACACTCAAAGGAAGGTGTCTACAACAATATAATGCGACGTTACTTAAAAGAAAAGATG  
AAGAACAGGAAGCTGGCAAAGAGAACAAACCACTGATCCACAGCCTCAGATTCTGGGA  
CTTACAGCCTCACCTGGTGTAGGAGGTGCAACATCCTACTCAAAGCTGAAGAACATATTC  
TGAAAATCTGTGCCAATCTTGATGCATGTAGAATCATGACTGTTGAAGAGCATGCCTCCCA  
GTTGAAGAATCAGGTGAAGGAACCTTATAAGAAGACTGTGATTGCAGATGACAAAAGAAGA  
GATCCATTTAGAGAGAGAATTACTGAGATCATGACAGACATTCAAACCTATTGCCAGCTCCA  
TCCAAAATCTGAGTTTGGAACCTCAGACATATGAACAGTGGGTGATTAGAGAAGAGAGAAAA  
GCTGCAAAAAGAAGAAAAACGCAAGGAACGTGTCTGTGCAGAACACTTGAAGAAATACAATG  
ATGCTCTCCAGATAAATGACACCATCCGAATGGTGGATGCGTACAATCACCTAAATAACTTT  
TATAAGGAGGAGAAAAAGTAAGAAAACAGTAAGGAGTGATGATGATGATGAACCAGCAGTAT  
CAAACAGGATGAAACAGATGAATTTCTAATAGGTTTATTTTCATGCAAAAAAGAAACAGCTG  
AAAGAATTGGCTAGAAAGCCAGAATACGAAAATGAGAAGCTAATACAGTTGCGAAAGACTC  
TGATGGAGGAGTTCACGAAGACTGAGGAACCTAGAGGAATTATTTTCACAAAGACTCGGCT  
AAGTGCCTTTGCTCTATTGCAGTGGATTAAGGATAACCCAAAATTTGAAGAAGTGGAATTA  
AGGCCAGTTATCTTATTTGTGCTGGACCTAACAGTGAAATTAACCCATGACTCAGAATGAG  
CAAAGGGAAGTTATTGATAAATTCCGAGGTGGAAATGTAAATTTACTTATTGCTACTACTGT  
AGCTGAGGAAGGCCTAGACATCAAAGAGTGTAACATCGTTATTCGCTATGGCCTCGTCACC  
AATGAAATTGCTATGGTGCAGGCTCGTGGTGCAGCTCGAGCTGATGAGAGCACCTATGCA  
CTTGTGGCTTCGAGTGGCTCAGGAGCTGTTGAACGTGAAGATGTTAATAATTTCCGTGAGA  
AAATGATGTATAAGGCCATTCAGCGTGTCCAGAAGATGCCGCAGGAAGAGTATTTAAATAA  
GATACAGAATTTCCAGTTGCAAAGTATAGTGGAACAAATGAAGGCAAAGAGAGATCGG  
CACAAGACATACAAGAAAAATCCTTCACTAATAACATTCTATGCAAAAATTGCCACAAGCT  
GGTATGTTCTGGAGAAGACATACAAGTTATTGAAAACATGCATCATGTCAGTGTGAAAAAG  
ATTTCCAAAGTCTTTACCATACAAGAGAAAATAAGACACTGCAAGATAAGCATGCCGATTAC  
CAGACAAATGGGGAAATTATATGTAAAGATTGTGGACAAGCTTGGGGAAATATGATGGTTC  
ACCGAGGCCTTGACCTGCCTTGTCTAAAGATTAGAAATTTTGTGGTTGTGTTGAAGACAA  
GAAAACAACAAAGCATATTTTTAAGAAATGGGGAGAACTGCCTGTCAGGTTCCCTAGTTTTG  
ATTATGCAGCTCATTGTCCTTCAAGTGATGAAGAT

>eudyptula\_minor-sphenisciformes-mda5

ATGGCAGAGGAATCCCGAGACGAGCGCTTCCTCTACTTGATCTCCTGCTTCAGGCCGCGG  
CTGAAGCAGTTCATCCGGGTGCAGCCGGTGCTGGACCTGCTTCCCTCGCTGAGCGCTGG  
GGAGAGGGGAGAAGGTGCGGGCGGCCGCGCTGCAGCGGGGCGAGGTGGAGGGGGCGGA  
GGAGCTGCTGCGGGTCTGTCGAGCGGGGGCCCCGCGGGTGCGGCTGGTTCCACGAGTTC  
CTGCAGGCGCTGGAGCAAGGTGGCTGCAGCCTGGCCGCCTGCTACGTGAATCCCAGCCT  
CAGCCAGCTGCCCTCGGCGGCCGAGGAGGAGGACCATGACCTCTGCGTGCACTTGGTGC  
AGCTGCTCCACAGCACACTGGTGGATAGAATGCAGACCATGCAGGTGGCTGAGAAATGCC  
TGCAGATGGGTATCTTCCAGGACGAGGACCTGGATCGGATCCCACTGTTACTGACAATC  
GTGGGAACAGAGATGGTGCAAGGGAGCTATTGAGCAGGATTGTGCAGAAGAAAGATTGGT  
TCTCTCCTTTTTTATTGCTCTGCGTGAAACCCAGCATGGAGGCCTTGAGATGATTTAAG  
CGGAAATACAGGAGGAACAGAGAATAGACAAAATGAGATGAAGAACAGTACAAATGAAGAA



ACGGAAGTTACAAGCCAACCAGGATATGCCATAGTGGAGGATCTGAAACAGCAAGAAAAT  
GTGAATGATAGTTTCAGCAGTGAGAACAGTGTATTGGAAACATCTATTGGAAAGAATTCTAT  
AGTTTCAGAGTCAGATGTCTCCACAGGAGATGGAAGTGTGAGTAACTCGAATGAAAACCTG  
GGACAGAGCTGCACAACCAGTGATTCAGATGAAGATGAAGTGGAGAGTAGAGCTTCACCT  
GAGCCAGATCTGATCCTGAGAGATTACCAGATGGAAGTTGCAAAGCCAGCACTGAATGGG  
GAGAATATTATAATATGTCTCCCTACAGGCAGTGGTAAAACCAGAGTGGCTGTTTACATTAC  
CAAAGATCACTTGGATAAGAAGAAAAGAGCATCAGAGCCTGGAAAAGTTATAGTACTTGT  
AATAAGGTACCATTGGTAGAACAGCATTTACGAAAGGAGTTTAATCCATTCTGAAGCGTTG  
GTATCAGGTTATTGGTTTAAGTGGTGATTCTCAGCTGAAAATCTCATTTCTGAAGTTGTCA  
GTAGAAATGATGTCATCATCAGTACAGCACAGATCCTTGAGAATTCAGTGTAAATGCAGCC  
GAAGAAGATGAAGAAGGTGTCCACTTATCAGATTTTTCACTCATCATTATCGATGAGTGTCA  
TCACACTCAAAGGAAGGTGTCTACAACAATATAATGCGACGTTACTTAAAAGAAAAGATGA  
AGAACAGGAAGCTGGCAAAAGAAAACAAACCACTGATCCACAGCCTCAGATTCTGGGAC  
TTACAGCCTCACCTGGTGTAGGAGGTGCAACATCCTATTCAAAGCTGAAGAACATATTCT  
GAAAATCTGTGCCAATCTTGATGCATTTAGAATCATGACTGTTGAAGAGCATGCCTCCAGT  
TGAAGAATCAGGTGAAGGAACCGTATAAGAAGACGGTGATTGCAGATGACAAAAGAAGAG  
ATCCATTTAGAGAGAGAATTACTGAGATCATGACAGACATTCAAACCTATTGCCAGCTCCAT  
CCAAAATCTGAGTTTGGAACTCAGACATATGAACAGTGGGTGATTAGAGAAGAGAGAAAAG  
CTGCAAAAGAAGAAAAACGCAAGGAACGTGTCTGTGCAGAACACCTGAAGAAATACAATGA  
TGCTCTCCAGATAAATGACACCATCCGAATGGTGGATGCATACAATCACCTAAATAACTTTT  
ATAAGGAGGAGAAAAAGTAAGAAAACAGTAAGGAGTGATGATGATGATGAACCAGCAGTATC  
AAAACAGGATGAAACAGATGAATTTCTAATAGGTTTATTTTCATGCAAAAAAGAAGCAGCTGA  
AAGAATTGGCTAGAAAGCCAGAATACGAAAATGAGAAGCTAATACAGTTGCGAAAGACTCT  
GATGGAGGAGTTCACGAAGACTGAGGAACCTAGAGGAATTATTTTCACAAAGACTCGGCTA  
AGTGCCCTTTGCTCTATTGCAGTGGATTAAGGATAACCCAAAATTTGAAGAAGTGGGAATTAA  
GGCCAGTTATCTTATTGGTGCTGGACATAACAGTGAAATTAACCCATGACTCAGAATGAG  
CAAAGGGAAGTTATTGACAAATTCCGAGGTGGAATGTAAATTTACTTATTGCTACTACTGT  
AGCTGAGGAAGGCCTAGACATCAAGGAGTGTAAACATCGTTATTTCGCTATGGCCTCGTCACC  
AATGAAATTGCTATGGTGCAGGCTCGTGGTGCAGCTCGAGCTGACGAGAGCACCTATGCA  
CTTGTGGCTTCGAGTGGCTCAGGAGCTGTTGAACGTGAAGATGTTAATATTTTCCGTGAGA  
AAATGATGTATAAGGCCATTCAGCGTGTCCAGAGGATGCCGCAGGAAGAGTATTTAAATAA  
GATACAGAATTTCCAGTTGCAAAGTATAGTGGAAAAACAAATGAAGGCAAAGAGAGATCGG  
CACAAGACATACAAGAAAAATCCTTCACTAATAACATTCTATGCAAAAATTGCCACAAGCT  
GGTATGTTCTGGAGAAGACATACAAGTTATTGAAAACATGCATCATGTGAGTGTGAAAAAG  
ATTTCCAAAGTCTTTACCATAACAAGAGAAAATAAGACACTGCAAGATAAGCATGCCGATTAC  
CAGACAAATGGGGAAATTATATGTAAAGATTGTGGACAAGCTTGGGGAAATATGATGGTTC  
ACCGAGGCCTTGACTTGCCTTGTCTAAAGATTAGAAATTTTGTGGTTGTGTTTGAAGACAAG  
AAAACAACAAAGCATATTTTTAAGAAATGGGGAGAACTGCCTGTCAGGTTCCCTAGTTTTGA  
TTATGCAGCTCATTGTCCTTCAAGTGATGAAGAT

>spheniscus\_magellanicus-sphenisciformes-mda5

ATGGCAGAGGAGTCCCGAGACGAGCGCTTCCTCTACCTGATCTCCTGCTTCAGGCCGCGG  
CTGAAGCAGTTCATCCGGGTGCAGCCGGTGCTGGACCTGCTTCCCTCGCTGAGCGCTGG  
GGAGAGGGGAGAAGGTGCGGGGCGGCCGCGCTGCAGCGGGGCGAGGTGGAGGGGGCGGA  
GGAGCTGCTGCGGGTCGTGAGCGGGGGCCCCGCGGGTGCGGCTGGTTCCACGAGTTC

CTGCAGGCGCTGGAGCAAGGTGGCTGCAGCCTGGCCGCCTGCTACGTGAACCCTAGCCT  
CAGCCAGCTGCCCTCGGCGGCCGAGGAGGAGGACCATGACCTCTGCGTGCACCTTGGTGC  
AGCTGCTCCACAGCACACTGGTGGATAGAATGCAGACCATGCAGGTGGCTGAGAAGTGCC  
TGCAGATGGGCATCTTCCAGGACGAGGACCTGGATCGGATCCACACTGTTACTGACAATC  
GTGGGAACAGAGATGGTGCAAGGGAGCTATTGAGCAGGATTGTGCAGAAGAAAGATTGGT  
TCTCTCCTTTTTTGGATTGCTCTGCGTGAAACCCAGCATGGAGGCCTTGCAGATGATTTAAG  
CGGAAATACAGGAGGAACAGAGAATAGACAAAATGAGATGAAGAACAGTACAAATGAAGAA  
ACGGAAGTTACAAGCCAACCAGGATATGCCATAGTGGAGGATCTGAAACAGCAAGAAAAT  
GTGAATGATAGTTTTAGCAGTGAGAACAGTGTATTGGAAACATCTATTGGAAAGAATTCTAT  
AGTTTCAGAGTCAGATGTCTCCACAGGAGATGGAAGTGTGAGTAACTCGAACGAAAACCTG  
GGACAGAGCTGCACAACCAGTGATTGAGATGAAGATGAAGTGGAGAGTAGAGCTTCACCT  
GAGCCAGAGCTGATCCTGAGAGATTACCAGATGGAAGTTGCAAAGCCAGCACTGAATGGG  
GAGAATATTATAATATGTCTCCCTACAGGCAGTGGTAAAACCAGAGTGGCTGTTTACATTAC  
CAAAGATCACTTGGATAAGAAGAAAAGAGCATCAGAGCCTGGAAAAGTTATAGTACTTGTT  
AATAAGGTACCATTGGTAGAACAGCATTTACGAAAGGAGTTTAATCCATTCTGAAGCGTTG  
GTATCAGGTTATTGGTTTAAGTGGTGATTCTCAGCTGAAAATCTCATTTCTGAAGTTGTCA  
GTAGAAATGATGTCATCATCAGTACAGCGCAGATCCTTGAGAATTCAGTGTAAATGCAGC  
CGAAGAAGATGAAGAAGGTGTCCACTTATCAGATTTTTCTACTCATCATTATCGATGAGTGT  
ATCACACTCAAAGGAAGGTGTCTACAACAATATAATGCGACGTTACTTAAAAGAAAAGATG  
AAGAACAGGAAGCTGGCAAAGAAAACAAACCACTGATCCACAGCCTCAGATTCTGGGA  
CTTACAGCCTCACCTGGTGTAGGAGGTGCAACATCCTACTCAAAGCTGAAGAACATATTC  
TGAAAATCTGTGCCAATCTTGATGCATTTAGAATCATGACTGTTGAAGAGCATGCCTCCAG  
TTGAAGAATCAGGTGAAGGAACCGTATAAGAAGACGGTGATTGCGGATGACAAAAGAAGA  
GATCCATTTAGAGAGAGAATTACTGAGATCATGACAGACATTCAAACCTATTGCCAGCTCCA  
TCCAAAATCTGAGTTTGGAAGTCAAGACATATGAACAGTGGGTGATTAGAGAAGAGAGAAAA  
GCTGCAAAAGAAGAAAAACGCAAGGAACGTGTCTGTGCAGAACACTTGAAGAAATACAATG  
ATGCTCTCCAGATAAATGACACCATCCGAATGGTGGATGCGTACAATCACCTAAATACTTT  
TATAAGGAGGAGAAAAAGTAAGAAAACAGTAAGGAGTGATGATGATGATGAACCAGCAGTAT  
CAAACAGGATGAAACAGATGAATTTCTAATAGGTTTATTTTCATGCAAAAAAGAAGCAGCTG  
AAAGAATTGGCTAGAAAGCCAGAATATGAAAATGAGAAGCTAATACAGTTGCGAAAGACTC  
TGATGGAGGAGTTCACGAAGACTGAGGAACCTAGAGGAATTATTTTCACAAAGACTCGGCT  
AAGTGCATTTGCTCTATTGCAGTGGATTAAGGATAACCCAAAATTTGAAGAAGTGGGAATTA  
AGGCCAGTTATCTTATTGGTGTCTGGACATAACAGTGAAATTAACCCATGACTCAGAAATGA  
GCAAAGGGAAGTTATTGACAAATTCGAGGTGGAAATGTAAATTTACTTATTGCTACTACTG  
TAGCTGAGGAAGGCCTAGACATCAAAGAGTGTAACATCGTTATTCGCTATGGCCTCGTCAC  
CAATGAAATTGCTATGGTGCAGGCTCGTGGTCGAGCTCGAGCTGATGAGAGCACCTATGC  
ACTTGTGGCTTCGAGTGGCTCAGGAGCTGTTGAACGTGAAGATGTTAATATTTTCCGTGAG  
AAAATGATGTATAAGGCCATTCAGCGTGTCCAGAAGATGCCGCAGGAAGAGTATTTAAATA  
AGATACAGAATTTCCAGTTGCAAAGTATAGTGGAAAAACAAATGAAGGCCAAAGAGAGATCG  
GCACAAGACATACAAGAAAAATCCTTCACTAATAACATTCCTATGCAAAAATTGCCACAAGC  
TGGTATGTTCTGGAGAAGACATACAAGTTATTGAAAACATGCATCATGTGAGTGTAAGAAAA  
GATTTCCAAAGTCTTTACCATACAAGAGAAAAATAAGACACTGCAAGATAAGCATGCCGATTA  
CCAGACAAATGGGGAAATTATATGTAAAGATTGTGGACAAGCTTGGGGAAATATGATGGTT  
CACCGAGGCCTTGACCTGCCTTGTCTAAAGATTAGAAATTTTGTGGTTGTGTTTGAAGACAA

GAAAACAACAAAGCATATTTTTAAGAAATGGGGAGAACTGCCTGTCAGGTTCCCTAGTTTTG  
ATTATGCAGCTCATTGTCCTTCAAGTGATGAAGAT

>eudypetes\_moseleyi-sphenisciformes-mda5

ATGGCAGAGGAGTCCCGAGACGAGCGCTTCCTCTACCTGATCTCCTGCTTCAGGCCGCGG  
CTGAAGCAGTTCATCCGGGTGCAGCCGGTGCTGGACCTGCTTCCCTCGCTGAGCGCTGG  
GGAGAAGGAGAAGGTGCGGGCGGCCGCGCTGCAGCGGGGCGAGGTGGAGGGGGCGGA  
GGAGCTGCTGCGGGTTCGTCGAGCGGGGGCCCCGCGGGTGCGGCTGGTTCCACGAGTTC  
CTGCAGGCGCTGGAGCAAGGTGGCTGCAGCCTGGCCGCTGCTACGTGAACCCACGCCT  
CAGCCAGCTGCCCTCGGCGGCCGAGGAGGAGGACCATGACCTCTGCGTGCACCTTGGTGC  
AGCTGCTCCACAGCACACTGGTGGATAGAATGCAGACCATGCAGGTGGCTGAGAAGTGCC  
TGCAGATGGGCATCTTCCAGGACGAGGACCTGGATCGGATCCACACTGTTACTGACAATC  
GTGGGAACAGAGATGGTGCAAGGGAGCTATTGAGCAGGATTGTGCAGAAGAAAGATTGGT  
TCTCTCCTTTTTTATTGCTCTGCGTGAAACCCAACATGGAGGCCTTGAGATGATTTAAGC  
GGAAATACAGGAGGAACAGAGAATAGACAAAATGAGATGAAGAACAGTACAAATGAAGAAA  
CGAAAGTTACAAGCCAACCAGGATATGCCATAGTGAGGATCTGAAACAGCAAGAAAATGT  
GAATGATAGTTTCAGCAGTGAGAACAGTGTATCGGAAACATCTATTGGAAAGAATTCTATAG  
TTTCAGAGTCCGATGTCTCCACAGGAGATGGAAGTGTCAGTAACTCGAATGAAAACCTGGG  
ACAGAGCTGCACAACCAGTGATTCAGATGAAGATGAAGTGGAGAGTAGAGCTTCACCTGA  
GCCAGATCTGATCCTGAGAGATTACCAGATGGAAGTTGCAAAGCCAGCACTGAATGGGGA  
GAATATTATAATATGTCTCCCTACAGGCAGTGGTAAAACCAGAGTGGCTGTTTACATTACCA  
AAGATCACTTGGATAAGAAGAAAAGAGCATCAGAGCCTGGAAAAGTTATAGTACTTGTTAAT  
AAGGTACCATTGGTAGAACAGCATTTACGAAAGGAGTTTAATCCATTCCCTGAAGCGTTGGT  
ATCAGGTTATTGGTTAAGTGGTGATTCTCAGCTGAAAATCTCATTTCCCTGAAGTTGTCAGT  
AGAAATGATGTCATCATCAGTACAGCACAGATCCTTGAGAATTCATATTAATGCAGCCGA  
AGAAGATGAAGAAGGTGTCCACTTATCAGATTTTTTCACTCATCATTATCGATGAGTGTATC  
ACACTCAAAAGGAAGGTGTCTACAACAATATAATGCGACGTTACTTAAAAGAAAAGATGAAG  
AACAGGAAGCTGGCAAAAGAAAACAAACCACTGATCCCACAGCCTCAGATTCTGGGACTTA  
CAGCCTCACCTGGTGTAGGAGGTGCAACATCCTACTCAAAAGCTGAAGAACATATTCTGAA  
AATCTGTGCCAATCTTGATGCATTTAGAATCATGACTGTTGAAGAGCATGCCTCCCAGTTGA  
AGAATCAGGTGAAGGAACCGTATAAGAAGACGGTGATTGCGGATGACAAAAGAAGAGATC  
CATTTAGAGAGAGAATTACTGAGATCATGACAGACATTCAAACTATTGCCAGCTCCATCCA  
AAATCTGAGTTTGGAACCTCAGACATATGAACAGTGGGTGATTAGAGAAGAGAGAAAAGCTG  
CAAAAGAAGAAAAACGCAAGGAACGTGTCTGTGCAGAACACTGAAGAAATACAATGATGC  
TCTCCAGATAAATGACACCATCCGAATGGTGGATGCGTACAATCACCTAAATAACTTTTATA  
AGGAGGAGAAAAGTAAGAAAACAGTAAGGAGTGATGATGATGATGAACCAGCAGTATCAAA  
ACAGGATGAAACAGATGAATTTCTAATAGGTTTATTTTCATGCAAAAAAGAAGCAGCTGAAAG  
AATTGGCTAGAAAGCCAGAATACGAAAATGAGAAGCTAATACAGTTGCGAAAGACTCTGAT  
GGAGGAGTTCACGAAGACTGAGGAACCTAGAGGAATTATTTTCACAAAGACTCGGCTAAGT  
GCCTTTGCTCTATTGCAGTGGATTAAGGATAACCCAAAATTTGAAGAAGTGGGAATTAAGG  
CCAGTTATCTTATTGGTGCTGGACATAACAGTGAAATTAAACCCATGACTCAGAATGAGCAA  
AGGGAAGTTATTGACAAATTCCGAGGTGGAAATGTAAATTTACTTATTGCTACTACTGTAGC  
TGAGGAAGGCCTAGACATCAAAGAGTGTAACATCGTTATTCGCTATGGCCTCGTCACCAAT  
GAAATTGCTATGGTGCAGGCTCGTGGTCGAGCTCGAGCTGATGAGAGCACCTATGCACCTT  
GTGGCTTCGAGTGGCTCAGGAGCTGTTGAACGTGAAGATGTTAATATTTTCCGTGAGAAAA

TGATGTATAAGGCCATTCAGCGTGTCCAGAAGATGCCGCAGGAAGAGTATTTAAATAAGAT  
ACAGAATTTCCAGTTGCAAAGTATAGTGGAACAAATGAAGGCAAAGAGAGATCGGCAC  
AAGACATACAAGAAAAATCCTTCACTAATAACATTCCTATGCAAAAATTGCCACAAGCTGGT  
ATGTTCTGGAGAAGACATACAAGTTATTGAAAACATGCATCATGTCAGTGTGAAAAAAGATT  
TCCAAAGTCTTTACCATACAAGAGAAAAATAAGACACTGCAAGATAAGCATGCCGATTACCA  
GACAAATGGGGAAATTATATGTAAAGATTGTGGACAAGCTTGGGGAAATATGATGGTTCAC  
CGAGGCCTTGACCTGCCTTGTCTAAAGATTAGAAATTTTGTGGTTGTGTTTGAAGACAAGAA  
AACAACAAAGCATATTTTAAAGAAATGGGGAGAACTGCCCGTCAGGTTCCCTAGTTTTGATT  
ATGCAGCTCATTGTCCTTCAAGTGATGAAGAT

>megadyptes\_antipodes-sphenisciformes-mda5

ATGGCAGAGGAGTCCCGAGACGAGCGCTTCCTCTACCTGATCTCCTGCTTCAGGCCGCGG  
CTGAAGCAGTTCATCCGGGTGCAGCCGGTGCTGGACCTGCTTCCCTCGCTGAGCGCTGG  
GGAGAGGGAGAAGGTGCGGGCGGCCGCGTTGCAGCGGGGCGAGGTGGAGGGGGCGGA  
GGAGCTGCTGCGGGTCTGTCGAGCGGGGGCCCCGCGGGTGCGGCTGGTTCCACGAGTTC  
CTGCAGGCGCTGGAGCGAGGTGGCTGCAGCCTGGCCGCCTGCTACGTGAACCCAGCCT  
CAGCCAGCTGCCCTCGGCGGCCGAGGAGGAGGACCATGACCTCTGCGTGCATTGGTGC  
AGCTGCTCCACAGCACACTGGTGGATAGAATGCAGACCATGCAGGTGGCTGAGAAAGTGCC  
TGCAGATGGGCATCTTCCAGGACGAGGACCTGGATCGGATCCACACTGTTACTGACAATC  
GTGGGAACAGAGATGGTGCAAGGGAGCTACTGAGCAGGATTGTGCAGAAGAAAGATTGGT  
TCTCTCCTTTTTTATTGCTCTGCGTGAAACCCAACATGGAGGCCTTGAGATGATTTAAGC  
GGAAATACAGGAGGAACAGAGAATAGACAAAATGAGATGAAGAACAGTACAAATGAAGAAA  
CGAAAGTTACAAGCCAACCAGGATATGCCATAGTGGAGGATCTGAAACAGCAAGAAAATGT  
GAATGATAGTTTCAGCAGTGAGAACAGTGTATCGGAAACATCTATTGGAAAGAATTCTATAG  
TTTCAGAGTCCGATGTCTCCACAGGAGATGGAAGTGTGAGTAACTCGAATGAAAACCTGGG  
ACAGAGCTGCACAACCAAGTGATTGAGATGAAGATGAAGTGGAGAGTAGAGCTTCACCTGA  
GCCAGATCTGATCCTGAGAGATTACCAGATGGAAGTTGCAAGCCAGCACTGAATGGGGA  
GAATATTATAATATGTCTCCCTACAGGCAGTGGTAAAACCAGAGTGGCTGTTTACATTACCA  
AAGATCACTTGGATAAGAAGAAAAGAGCATCAGAGCCTGGAAAAGTTATAGTACTTGTTAAT  
AAGGTACCATTGGTAGAACAGCATTACGAAAGGAGTTTAAATCCATTCCCTGAAGCGTTGGT  
ATCAGGTTATTGGTTTAAAGTGGTGATTCTCAGCTGAAAATCTCATTTCCCTGAAGTTGTCAGT  
AGAAATGATGTCATCATCAGTACAGCACAGATCCTTGAGAATTCATTATTAATGCAGCCGA  
AGAAGATGAAGAAGGTGTCCACTTATCAGATTTTTTCACTCATCATTATCGATGAGTGTGATC  
ACACTCAAAAGGAAGGTGTCTACAACAATATAATGCGACGTTACTTAAAAGAAAAGATGAAG  
AACAGGAAGCTGGCAAAAAGAAAACAAACCACTGATCCACAGCCTCAGATTCTGGGACTTA  
CAGCCTCACCTGGTGTAGGAGGTGCAACATCCTACTCAAAAGCTGAAGAACATATTCTGAA  
AATCTGTGCCAATCTTGATGCATTTAGAATCATGACTGTTGAAGAGCATGCCTCCCAGTTGA  
AGAATCAGGTGAAGGAACCGTATAAGAAGACGGTGATTGCGGATGACAAAAGAAGAGATC  
CATTTAGAGAGAGAATTACTGAGATCATGACAGACATTCAAACTATTGCCAGCTCCATCCA  
AAATCTGAGTTTGGAACTCAGACATATGAACAGTGGGTGATTAGAGAAGAGAGAAAAGCTG  
CAAAAGAAGAAAACGCAAGGAACGTGTCTGTGCAGAACACTTGAAGAAATACAATGATGC  
TCTCCAGATAAATGACACCATCCGAATGGTGGATGCGTACAATCACCTAAATAACTTTTTATA  
AGGAGGAGAAAAGTAAGAAAACAGTAAGGAGTGATGATGATGATGAACCAGCAGTATCAAA  
ACAGGATGAAACAGATGAATTTCTAATAGGTTTATTTTCATGCAAAAAGAAGCAGCTGAAAG  
AATTGGCTAGAAAGCCAGAATACGAAAATGAGAAGCTAATACAGTTGCGAAAGACTCTGAT

GGAGGAGTTCACGAAGACTGAGGAACCTAGAGGAATTATTTTCACAAAGACTCGGCTAAGT  
GCCTTTGCTCTATTGCAGTGGATTAAGGATAACCCAAAATTTGAAGAAGTGGGAATTAAGG  
CCAGTTATCTTATTGGTGCTGGACATAACAGTGAAATTAACCCATGACTCAGAATGAGCAA  
AGGGAAGTTATTGACAAATTCCGAGGTGGAAATGTAAATTTACTTATTGCTACTACTGTAGC  
TGAGGAAGGCCTAGACATCAAAGAGTGTAACATCGTTATTTCGCTATGGCCTCGTCACCAAT  
GAAATTGCTATGGTGCAGGCTCGTGGTCGAGCTCGAGCTGATGAGAGCACCTATGCACTT  
GTGGCTTCGAGTGGCTCAGGAGCTGTTGAACGTGAAGATGTTAATATTTTCCGTGAGAAAA  
TGATGTATAAGGCCATTGAGCGTGTCCAGAAGATGCCGCAGGAAGAGTATTTAAATAAGAT  
ACAGAATTTCCAGTTGCAAAGTATAGTGGAAAAACAAATGAAGGCAAAGAGAGATCGGCAC  
AAGACATACAAGAAAAATCCTTCACTAATAACATTCTATGCAAAAATTGCCACAAGCTGGT  
ATGTTCTGGAGAAGACATACAAGTTATTGAAAACATGCATCATGTGAGTGTGAAAAAAGATT  
TCCAAAGTCTTTACCATACAAGAGAAAATAAGACACTGCAAGATAAACATGCCGATTACCAG  
ACAAATGGGGAAATTATATGTAAAGATTGTGGACAAGCTTGGGGAAATATGATGGTTCCACC  
GAGGCCTTGACCTGCCTTGTCTAAAGATTAGAAATTTTGTGGTTGTGTTTGAAGACAAGAAA  
ACAACAAAGCATATTTTTAAGAAATGGGGAGAACTGCCCCGTCAGGTTCCCTAGTTTTGATTA  
TGCAGCTCATTGTCCTTCAAGTGATGAAGAT

>pandion\_haliaetus-falconiformes-mda5

ATGGCAGAGGAGTCCCGGGACGAGCGCTTCCTCTACATGATCTCCTGCTTCAGGCGGCG  
GCTGAAGCAGTTCATCCGGGTGCAGCCGGTGCTGGACCGGCTTCCCTCGCTGAGCGCGG  
AGGAGAGGGAGAAAGTGCGGGCGGCCGCCCTGCAGCGGGGCGAGGTGGAGGGGGCGG  
AGGAGCTGCTGCGGGCCGTGGAGCGGGGGCCCCGCGGATGCGGCTGGTTCCACGAGTT  
CCTGCAGGCGCTGGAGCACGGCGGCTGCAGCCTGGCCGCCTGCTACGTGAACCCTAGCC  
TCAGCCAGCTGCCCTCGCCGGCCGAGGAGGCCGACCACGACCTCTGCGTGCCTTGGTG  
CAGCTGCTTCACAGCACACTGGTGGATAGAATGCAGACCATGCAGGTGGCCGAGAAGTGC  
TTGCAGATGGGCATCTTCCAGGACGAGGACCTGGATCGGATCCACACTGTTACTGACAAT  
CGTGGGAACAGAGATGGTGCAGGGGAGCTACTGAGCAGAATCGTGCAGAAGAAAGATTGG  
TTCTCTCCTTTTTTGATTGCTCTGCGTGAAACCCAACATGGAGGCCTTGCTGATGATTTAAG  
TGGAACACAGGAGGAACAGAGAATAGACAAAATGGGATGAAGAACAGTACAAACGAAGA  
AACAGAAGTTAGAAGCCCACCAGGATATGCCATAGTGGAGGATCCGAAACAGCAAGAAAA  
CATGAATGAAAGTTTCAGCAGTGAGAACAGTGTTTTGAAACATCTATTGGAAAGAATTCTG  
TAGTTTCAGAGTCAGATGTCTCCATAGGAGACAGAAGTGTCAGTAACTTGAATGAAAACCT  
AGGACAGAGCTGCACAACCAGTGATTCAGATGAAGATGAAATGGAGAGCAGAGCTTCACC  
TGAGCCAGATCTGATCCTAAGAGATTACCAGATGGAAGTTGCAAAGCCAGCACTGAATGG  
GGAAAATATTATAATATGTCTCCCTACAGGCAGTGGTAAAACCAGAGTGGCTGTTTACATTA  
CCAAAGATCATTTGGATAAGAAGAAAAGAGTATCAGAGCCTGGAAAAGTTATAGTACTTGTT  
AATAAGGTACCATTGGTAGAACAGCATTTACGAAAGGAGTTTAATCCATTCTGAAGCGTTG  
GTATCAAGTTATTGGTTTAAGTGGCGATTCTCAGCTGAAAATCTCATTTCTGAAGTTGTCA  
GAAGAAATGATGTCATCATCAGTACAGCACAGATCCTTGAGAATTCGTTGTTAAATGCAGC  
CAAAGAAGATGAAGAAGGCGTCCAGTTATCAGATTTTTCACTCATCATTATCGATGAGTGT  
ATCACACTCAAAGGAAGGTGTCTACAACAATATAATGCGACGTTACTTAAAGAAAAGATG  
AAGAACCAGGAAGCTGGCAAAAGAAAACAAACCACTGATCCACAGCCTCAGATTCTGGGA  
CTTACAGCCTCACCTGGTGTAGGAGGTGCAACATCCTACTCAAAGCTGAAGAACATATTC  
TGAAAATCTGTGCCAATCTTGATGCATGTAGAATCATGACTGTTGAAGAGCATGCCTCCCA  
ATTGAATAATCAGGTGAAGGAACCATATAAGAAGACTGTGATTGCAGATGACAAAAGAAGG

GATCCATTTAGAGAGAGAATTACTGAGATCATGACAGACATTCAAACTATTGCCAGCTCCA  
TCCAAATCTGAGTTTGGAACCTCAGCCATATGAACAATGGGTGATTAGAGAAGAGAGAAGA  
GCTGCAAAAGAAGAAAAACGCAAGGAACGTGTGTGTGCAGAACACTTGAAGAAATACAATG  
ATGCTCTCCAGATAAATGACACCATCCGAATGGTGGATGCGTACAATCACCTAAATACTTT  
TATAAGGAGGAGAAAAAGTAAGAAGACAGTAAGGAGTGATGATGATGATGAACCAACAGTAT  
CAAAACAGGATGAAACAGATGAATTTCTAATAGCTTTATTTTCATGCAAAAAAGAAACAGCTG  
AAAGAGTTGGCTAGAAAGCCAGAATATGAAAATGAGAAGCTAATACAGTTGCGAAACACTT  
TAATGGAGGAGTTCACGAAGACTGAGGAACCTAGAGGAATTATTTTCACAAAGACTCGGTT  
AAGTGCCTTTGCTCTATTCCAGTGGATTAAGGATAACCCAAAATTTGAAGAAGTGGGAATTA  
AGGCCATTATCTTATCGGTGCTGGACATAACAGTGAAATTAAACCCATGACTCAGAATGA  
GCAAAGGGAAGTTATTGATAAATCCGAAGTGGAATGTAAATTTACTTATTGCTACTACTG  
TAGCTGAGGAAGGCCTAGACATCAAAGAATGTAACATCGTTATTCGCTATGGCCTCGTCAC  
CAATGAAATTGCTATGGTGCAGGCTCGCGGTGAGCTCGAGCTGATGACAGCACCTATGC  
ACTTGTGGCTTCGAGTGGCTCAGGAGCTGTTGAACGTGAAGATGTTAATATTTTCCGTGAG  
AAAATGATGTATAAGGCCATTCAGCGTGTCCAAAAGATGCCGCAGAAAGACTATTTAAATAA  
GATTCAGAAATTTCCAGTTGCAAAGTATAGTGGA AAAACAAATGAAGGCAAAGAGAGATCAG  
CGCAAGACAAACAACAAAAATCCTTCACTAATAACATTCTATGCAAAAATTGCCACAAGCT  
GATATGTTCTGGAGAAGACATAACAAGTTATTGAAAACATGCATCATGTCAGTGTGAAAAAG  
ATTTCCAAAGTCTTTACCATAACAAGAGAAAATAAGACACTGCAAGATAAGCATGCCGATTAC  
CAGATAAATGGGGAAATTATATGTAAAGATTGTGGACAAGCTTGGGGAAATATGATGGTTC  
ACCGAGGTCTTGACCTGCCATGTCTAAAGATTAGAAATTTTGTGCTTGTGTTTGAAGACAAG  
AAAACAACAAAGCAAATGTTTAAGAAATGGGGAGAACTGCCTGTCAGGTTCCCTAGTTTTG  
ATTATGCAGCTCATTGTCCTTCAAGTGATGAAGAT

>aquila\_chrysaetos\_canadensis-falconiformes-mda5

ATGGCCGCGGAGTCCCGAGACGAGCGCTTCCTCTACATGATCTCCTGCTTCAGGCCGCGG  
CTGAAGCAGGTCATCCGCGTGCAGCCGGTGCTGGACCGGCTTCCCTCGCTGAGCGCGGA  
GGAGAGGGAGAAGGTGCGGGCGGCCGCCCTGCAGCGGGGCGAGGTGGAGGGGGCGGA  
GGAGCTGCTGCGGGCTGTGGAGCGGGGGCCCCGCGGGTGCGGCTGGTTCCACGAGTTC  
CTGCAGGCGCTGGAGCACGGCGGCTGCAGCCTGGCCGCCTGCTACGTGAACCCAGCCT  
CAGCCAGCTGCCCTCGCCGGCCGAGGAGGCCGACCACGACCTCTGCGTGCATTTGGTGC  
AGCTGCTCCACAGCACGCTGGTGGATAAAATGCAGACCGTGCAGGTGGCCGAGAAGTGCT  
TGCAGATGGGCATCTTCCAGGACGAGGACCTGGATCGGATCCCACTGTTACTGACAATC  
GTGGGAACAGAGATGGTGCAAGGGAGCTACTGAGCAGAATAGTGCATAAGAAAGATTGGT  
TCTCTCCTTTTTTATTGCTCTGCGTGAAACCCAACATGGAGGCCTTGCAAGATGATTTAAGC  
GGAAATACAGGAGGAACGGAGAATAGGCCAAAATGGGATGAAGAACAGTACAAACGAAGAA  
ACAGAAGTTACAAGCCAACCAGGATATGCTGTAGTGGAGGATTTGAAACAGCAAGAAAACG  
TGAATGAAAGTTTCAGCAGTGAGAACAGTGTATTGGAAGCATGTATTGGAAGAATTCTGTA  
GTTTCAGAGTCACATGTCTCCATAGGAGATAGAAGTGTGAGTAATTTGAATGAAAACCTAG  
GACAGAGCTGCACAACCAAGTATTGATGAGATGAAGTGGAGAGCAGAGCTTCACCTG  
AGCCAGATCTGATCCTGAGAGATTACCAGATGGAAGTTGCAAAGCCAGCACTGAATGGGG  
AGAATATTATAATATGTCTCCCTACAGGCAGTGGTAAAACCAGAGTGGCTGTTTACATTACC  
AAAGATCATTTGGATAAGAAGAAAAGAGCATCAGAGCCCGGAAAAGTTATAGTACTTGTTAA  
TAAGGTACCATTGGTAGAGCAGCATTTACGAAAGGAGTTTAATCCATTCTGAAGCGTTGG  
TATCAGGTTATTGGTTTAAGTGGCGATTCTCAGCTGAAAATCTCATTTCTGAAGTTGTCAG

AAGAAATGATGTCATCATCAGTACAGCACAGATTCTTGAGAATTCATTGTTAAATGCAGCCA  
AAGAAGATGAAGAAGGTGTCCAGTTATCAGATTTTTCTACTCATCATTATCGATGAGTGT  
CACACTCAAAGGAAGGTGTCTACAACAATATAATGCGACGTTACTTAAAGAAAAGATGAA  
GAACAGGAAGCTGGCAAAAGAAAACAAACCACTGATCCACAGCCTCAGATTCTGGGACTT  
ACAGCCTCACCTGGTGTAGGAGGTGCAACATCCTACTCAAAGCTGAAGAACATATTCTGA  
AAATCTGTGCCAATCTTGATGCATGTAGAATCATGACTGTTGAAGAGCATGCCTCCCAATTG  
AAGAATCAGGTGAAGGAACCATATAAGAAGACTGTGATTGCAGATGACAAAAGAAGGGATC  
CATTTAGAGAGAGAATTACTGAGATCATGACAGACATTCAAACCTATTGCCAGCTCCATCCA  
AAATCTGAGTTTGGAACCTAGCCATATGAACAGTGGGTGATTAGAGAAGAGAGAAGAGCTG  
CAAAAGAAGAAAAACGCAAGGAACGTGTGTGTGCAGAGCACTTGAAGAAATACAATGATGC  
TCTCCAGATAAATGACACCATCCGAATGGTGGATGCGTACAATCACCTAAATAACTTTTATA  
AGGAGGAGAAAAGTAAGAAGACGGTAAGGAGTGTGATGATGATGAACCAGCCGTATCAA  
AACAGGATGAAACAGATGAATTTCTAATAGCTTTATTTTCATGCAAAAAAGAAACAGCTGAAA  
GAGTTGGCTAGAAAGCCAGAATATGAAAATGAGAAGCTAATACAGTTGCGAAACACTCTAA  
TGGAGGAGTTCACGAAGACTGAAGAACCTAGAGGAATTATTTTCACAAAGACTCGGCTAAG  
TGCCTTTGCTTTATTCCAGTGGATTAAGGATAACCCAAAATTTGAAGAAGTGGGAATTAAGG  
CCCATTATCTTATCGGTGCTGGACATAACAGCGAAATTAACCCATGACTCAGAATGAGCA  
AAGGGAAGTTATTGATAAATTCGAAGTGGAAATGTAAATTTACTTATTGCTACTACTGTAG  
CTGAGGAAGGCCTAGACATCAAAGAATGTAAACATCGTTATTCGCTATGGCCTCGTCACCAA  
TGAAATTGCTATGGTGCAGGCTCGTGGTGCAGCTCGAGCTGATGAGAGCACCTATGCACT  
TGTGGCTTCGAGTGGCTCAGGAGCTGTTGAACGTGAAGATGTTAATATTTTCCGTGAGAAA  
ATGATGTATAAGGCCATTTCAGCGTGTCCAAAAGATGCCGCAGGAAGAGTATTTAAATAAGA  
TTCAGAATTTCCAGTTGCAAAGTATAGTGGAAAAACAAATGAAGGCAAAGAGAGATCAGTG  
CAAGACATACAACAAAAATCCTTCACTAATAACATTCTATGCAAAAATTGCCACAAGCTGA  
TATGTTCTGGAGAAGACATACAGGTTATTGAAAACATGCATCATGTCAGTGTGAAAAAAGAT  
TTCCAAAGTCTTTACCATACAAGAGAAAATAAGACACTGCAAGATAAGCATGCCGATTACCA  
GATAAATGGGGAAATTATATGTAAAGATTGTGGACAAGCTTGGGGAAATATGATGGTTCAC  
CGAGGTCTTGACCTGCCTTGTCTAAAGATTAGAAATTTTGTGGTTGTGTTTGAAGACAAGAA  
AACAACAAAGCAAATGTTTAAGAAATGGGGAGAAGTGCCTGTCAGGTTCCCTAATTTTGATT  
ATGCAGCTCATTGTCCTTCAAGTGATGAAGAT

>aegyptius\_monachus-falconiformes-mda5

ATGGCAGCGGAGTCCCGAGACGAGCGCTTCCTCTACATGATCTCCTGCTTCAGGCCGCGG  
CTGAAGCAGGTCATCCGCGTGACGCCGGTGCTGGACCGGCTTCCTCGCTGAGCGCGGG  
GGAGAGGGGAGAAGGTGCGGGGCGGCCGCCCTGCAGCGGGGCGAGGTGGAGGGAGCGGA  
GGAGCTGCTGCGGGGCCGTGGAGCGGGGGCCCCGCGGGTGCAGGCTGTTCCACGAGTTC  
CTGCAGGCGCTGGAGCACGGCGGCTGCAGCCTGGCCGCCTGCTACGTGAACCCCAGCCT  
CAGCCAGCTGCCCTCGCCGGCCGAGGAGGCCGACCACGACCTCTGCGTGCACCTTGGTGC  
AGCTGCTCCACAGCACTCTGGTGGATAAAATGCAGGCCATGCAGGTGGCCGAGAAGTGCT  
TGCAGATGGGCATCTTCCAGGACGAGGACCTGGATCGGATCCCACTGTTACTGACAATC  
GTGGGAACAGAGATGGTGCAAGGGAGCTACTGAGCAGAATAGTGCATAAGAAAGATTGGT  
TCTCTCCTTTTTTGGATTGCTCTGCGTGAAACCCAACATGGAGGCCTTGCAGATGATTTAAGC  
GGAAATACAGGAGGAACAGAGAATAGACAAAATGGGATGAAGAACAGTACAAATGAAGAAA  
CAGAAGTTACAAGCCAGCCAGGATTTGCCGTAGTGGAGGATTTGAAACAGCAAGAAAACAT  
GAATGAAAGTTTCAGCAGTGAGAACAGTGTATGGGAAGCATGTATTGGAAGAATTCTGTA

GTTTCAGAGTCAGATGTCTCCATAGGAGATAGAAGTGTGAGCAACTTGAATGAAAACCTAG  
GACAGAGCTGCACAGCCAGTGATTCAGATGAAGATGAAATGGAGAGCAGAGCTTCACCTG  
AGCCAGATCTGATCCTGAGAGATTACCAGATGGAAGTTGCAAAGCCAGCACTGAATGGGG  
AGAATATTATAATATGTCTCCCTACAGGCAGTGGTAAAACCAGAGTGGCTGTTTACATTGCC  
AAAGATCATTTGGATAAGAAGAAAAGAGCATCAAAGCCTGGAAAAGTTATAGTACTTGTTAA  
TAAGGTACCATTGGTAGAGCAGCATTTACGAAAGGAGTTTAATCCATTCCCTGAAGCGTTGG  
TATCAGGTTATTGGTTTAAAGTGGCGATTCTCAGCTGAAAATCTCATTTCCCTGAAGTTGTCAG  
AAGAAATGACGTCATCATCAGTACAGCGCAGATCCTTGAGAATTCATTGTAAATGCAGCC  
AAAGAAGATGAAGAAGGCGTCCAGTTATCAGATTTTTCACTCATCATTATCGATGAGTGTCA  
TCACACTCAAAGGAAGGTGTCTACAACAATATAATGCGACGTTACTTAAAAGAAAAGATGA  
AGAACAGGAAGCTGGCAAAGAAAACAAACCACTGATCCACAGCCTCAGATTCTGGGAC  
TTACAGCCTCACCTGGTGTAGGAGGTGCAACATCCTACTCAAAGCTGAAGAACATATTCT  
GAAAATCTGTGCCAATCTTGATGCATGTAGAATCATGACTGTTGAAGAGCATGCCTCCCAA  
TTGAAGAATCAGGTGAAGGAACCATATAAGAAGACTGTGATTGCGGATGACAAAAGAAGGG  
ATCCATTTAGAGAGAGAATTACTGAGATCATGACAGACATTCAAACCTATTGCCAGCTCCAT  
CCAAAATCTGAGTTTGGAAGTCAAGCATATGAACAGTGGGTGATTAGAGAAGAGAGAAGAG  
CTGCAAAGAAAGAAAAACGCAAGGAACGTGTGTGTGCAGAACACTTGAAGAAATACAATGA  
TGCTCTCCAGATAAATGACACCATCCGAATGGTGGATGCGTACAATCACCTAAATAACTTTT  
ATAAGGAGGAGAAAAAGTAAGAAGACAGTAAGGAGTGATGATGATGATGAACCAGCAGTATC  
AAAACAGGATGAAACAGATGAATTTCTAATAGCTTTATTTTCATGCAAAAAAGAAACAGCTGA  
AAGAGTTGGCTAGAAAGCCAGAATATGAAAATGAGAAGCTAATACAGTTGCGAAACACTTT  
AATGGAGGAGTTCACGAAGACTGAAGAACCTAGAGGAATTATTTTCACAAAGACTCGGCTA  
AGTGCCCTTTGCTTTATTCCAGTGGATTAAGGATAACCCAAAATTTGAAGAAGTGGGAATTAA  
GGCCCATTATCTTATCGGTGCTGGACATAACAGTGAAATTAACCCATGACTCAGAATGAG  
CAAAGGGAAGTTATTGATAAATTCGAAGTGGAAATGTAAATTTACTTATTGCTACTACTGT  
AGCTGAGGAAGGCCTAGACATCAAAGAATGTAAACATCGTTATTCGCTATGGCCTCGTCACC  
AATGAAATTGCTATGGTGCAGGCTCGTGGTCGAGCTCGAGCTGATGAGAGCACCTATGCA  
CTTGTGGCTTCAAGTGGCTCAGGAGCTGTTGAACGCGAAGATGTTAATATTTTCCGTGAGA  
AAATGATGTATAAGGCCATTACAGCGTGTCCAAAAGATGCCGCAGGAAGACTATTTAAATAA  
GATTCAGAATTTCCAGTTGCAAAGTATAGTGGAAGAAACAAATGAAGGCAAAGAGAGATCAG  
CGCAAGACATACAACAAAAATCCTTCACTAATAACATTCTATGCAAAAAATTGCCACAAGCT  
GATATGTTCTGGAGAAGACATACAGGTTATTGAAAACATGCATCATGTCAGTGTGAAAAAG  
ATTTCCAAAGTCTTTACCATACAAGAGAAAATAAGACACTGCAAGATAAGCATGCTGATTAC  
CAGATAAATGGGGAAATTATATGTAAAGATTGTGGACAAGCTTGGGGAAATATGATGGTTC  
ACCGAGGTCTTGACCTGCCTTGTCTAAAGATTAGAAATTTTGTGGTTGTGTTTGAAGACAAG  
AAAACAACAAAGCAAATGTTTAAGAAATGGGGAGAACTGCCTGTCAGGTTCCCTAATTTTGA  
TTATGCAGCTCATTGTCCTTCAAGTGATGAAGAT

>accipiter\_nisus-falconiformes-mda5

ATGGCAGCGGAGTGCCGAGACGAGCGCTTCCTCTACATGATCTCCTGCTTCAGGCCGCGG  
CTGAGGCAGGTCATCCGCGTGCAGCCGGTGCTGGACCGGCTTCCTCGCTGAGCGCGGC  
GGAGAGGGGAGAAGGTGCGGGCGGCCGCCCTGCAGCGGGGCGAGGTGGAGGGGGCGGA  
GGAGCTGCTGCGGGCCGTGGAGCGGGGGCCCCGCGGGTGCGGCTGTTCCACGAGTTC  
CTGCAGGCGCTGGAGCACGGCGGCTGCAGCCTGGCCGCCTGCTACGTGAACCCAGCCT  
CAGCCAGCTGCCCTCGCCGGCCGAGGAGGCCGACCACGACCTCTGCGTGCACCTGGTGC



AGCTGCTCCACGGCACGCTGGTGGATAAAATGCAGACCATGCAGGTGGCCGAGAAGTGCT  
TGCAGATGGGCATCTTCCAGGACGAGGACCTGGACCGGATCCACACTGTTACTGACAATC  
GTGGGAACAGAGATGGTGCAAGGGAGCTACTGAGCAGAATAGTGCATAAGAAAGATTGGT  
TCTCTCCTTTTTTATTGCTCTGCGTGAAACCCAACATGGAGGCCTTGCAGATGATTTAAGC  
GGAAATACAGGAGGAACAGAGAATAGACAAAATGGGATGAAGAACAGCACAAATGAAGAA  
ACAGAAGTTACAAGCCAACCAGGATATGCCGTAGTGGAGGATTTGAAACAGCAAGAAAAC  
GTGAATGAAAGTTTCAGCAGTGAGAACAGTGTATTGGAAGCATGTATTGGAAGAATTCTG  
TAGTTTCAGAGTCAGATGTCTCCATAGGAGATAGAAGTGTGAGTAACATGAATGAAAACCTA  
GGACAGAGCTGCACAACCAGTGATTGAGATGAAGATGAAATGGAAAGCAGAGCTTCACCT  
GAGCCAGATCTGATCCTGAGAGATTACCAGATGGAAGTTGCAAAGCCAGCACTGAATGGG  
GAGAATATTATAATATGTCTCCCTACAGGCAGTGGTAAAACCAGAGTGGCTGTTTACATTAC  
CAAAGATCATTGATGATAAGAAGAAAAGAGCATCAGAGCCCGGAAAAGTTATAGTACTTGTT  
AATAAGGTACCATTGGTAGAGCAGCATTTACGAAAGGAGTTTAATCCATTCTGAAGCGTT  
GGTATCAGGTTATTGGTTTAAAGTGGCGATTCTCAGCTAAAAATCTCATTTCCTGAAGTTGTC  
AGAAGAAATGATGTCATCATCAGTACAGCGCAGATCCTTGAGAATTCATTGTTAAATGCAGC  
TAAAGAAGATGAAGAAGGTGTCCAGTTATCAGATTTTTCACTCATCATTATCGATGAGTGTC  
ATCACACTCAAAGGAAGGTGTCTACAACAATATAATGCGACGTTACTTAAAAGAAAAGATG  
AAGAACAAGAAGCTGGCAAAGAAAACAAACCACTGATCCACAGCCTCAGATTCTGGGAC  
TTACAGCCTCACCTGGTGTAGGAGGTGCAACATCCTACTCAAAGCTGAAGAACATATTCT  
GAAAATCTGTGCCAATCTTGATGCATGTAGAATCATGACTGTTGAAGAGCATGCCTCCCAA  
CTGAACAATCAGGTGAAAGAACCATATAAGAAGACTGTGATTGCAGATGACAAAAGAAGGG  
ATCCATTTAGAGAGAGAATTACTGAGATCATGACAGACATTCAAACCTATTGCCAGCTCCAT  
CCAAAATCTGAGTTTGGAAGCTCAGCCATATGAACAGTGGGTGATTAGAGAAGAGAGAAGAG  
CTGCAAAGAAAGAAAAACGCAAGGAACGTGTGTGTGTCAGAACACTTGAAGAAATACAATGA  
TGCTCTCCAGATAAATGACACCATCCGAATGGTGGATGCGTACAATCACCTAAATAACTTTT  
ATAAGGAGGAGAAAAAGTAAGAAGACAGTAAGGAGTGATGATGATGAACCAGCAGTATC  
AAAGCAAGATGAAACAGATGAATTTCTAATAGCTTTATTTTCATGCAAAAAAGAAACAGCTGA  
AAGAGTTGGCTAGAAAAGCCAGAATATGAAAATGAGAAGCTAATACAGTTGCGAAACACTTT  
AATGGAGGAGTTCACGAAGACTGAAGAACCTAGAGGAATTATTTTCACAAAGACTCGGCTA  
AGTGCCCTTTGCTTTATTCCAGTGGATTAAGGATAACCCAAAATTTGAAGAAGTGGGAATTAA  
GGCCCATATCTTATCGGTGCTGGACATAACAGTGAAATTAACCCATGACTCAGAATGAG  
CAAAGGGAAGTTATTGATAAATTCCGAAGTGGAAATGTAAATTTACTTATTGCTACTACTGT  
AGCTGAGGAAGGCCTAGACATCAAAGAATGTAAACATCGTTATTGCTATGGCCTCGTCACC  
AATGAAATTGCTATGGTGCAGGCTCGTGGTGCAGCTCGAGCTGATGAGAGCACCTATGCA  
CTTGTGGCTTCGAGTGGCTCAGGAGCTGTTGAACGCGAAGATGTTAATATTTTCCGTGAGA  
AAATGATGTATAAGGCCATTGAGCGTGTCCAAAAGATGCCACAGGAAGAGTATTTAAATAA  
GATTCAGAATTTCCAGTTGCAAAGTATAGTGGAAAAACAAATGAAGGCAAAGAGAGATCAG  
TGCAAGACATACAACAAAATCCTTCACTAATAACATTCTATGCAAAAATTGCCACAAGCT  
GGTATGTTCTGGAGAAGACATACAGGTTATTGAAAACATGCATCATGTGAGTGTGAAAAAA  
GATTTCCAAGGTCTTTACCATACAAGAGAAAATAAGACACTGCAAGATAAGCATGCCGATTA  
CCAGATAAATGGGGAAATTATATGTAAAGATTGTGGACAAGCTTGGGGAAATATGATGTTT  
CACCGAGGTCTTGACCTGCCTTGTCTAAAGATTAGAAATTTTGTGGTTGTGTTTGAAGACAA  
GAAAACAACAAAGCAAATGTTTAAGAAATGGGGAGAACTGCCTGTCAGGTTCCCTAATTTT  
GATTATGCAGCTCATTGTCCTTCAAGTGATGAAGAT

>butastur\_indicus-falconiformes-mda5

ATGGCAGCGGAGACCCGAGACGAGCGCTTCCTCTACATGATCTCCTGCTTCAGGCCGCGG  
CTGAAGCAGGTCATCCGCGTGCAGCCGGTGCTGGACCGGCTTCCCTCGCTGAGCGCGGA  
GGAGAGGGAGAAGGTGCGGGCGGCCGCCCTGCAGCGGGGCGAGGTGGAGGGGGCGGA  
GGAGCTGCTGCGGGCCGTGGAGCGGGGGCCCCGCGGGTGCGGCTGGTTCCACGAGTTC  
CTGCAGGCGCTGGAGCACGGCGGCTGCAGCCTGGCCGCTGCTACGTGAACCCAGCCT  
CAGCCAGCTGCCCTCGCCGGCCGAGGAGGCCGACCACGACCTCTGCGTGCACTTGGTG  
AGCTGCTCCACGGCACGCTGGTGGATAAAATGCAGACCGTGCAGGTGGCCGAGAAGTGC  
TTGCAGATGGGCATCTTCCAGGATGAGGACCTGGATCGGATCTACACTGTTACTGACAATC  
GTGGGAACAGAGATGGTGCAAGGGAGCTACTGAGCAGAATAGTGCATAAGAAAGATTGGT  
TCTCTCCTTTTTTATTGCTCTGCGTGAAACCCAACATGGAGGCCTTGAGATGATTTAAGC  
GGAAATACAGGAGGAACAGAGAATAGACAAAATGGGATGAAGAACAGTACAAATGAAGAAA  
CAGAAGTTACAAGCCAACCAGGATATGCCGTAGTGGAGGATTTGAAACAGCAAGAAAACGT  
GAATGAAAGTTTCAGCAGTGAGAACAGTGTATTGGAAGCATGTATTGGAACGAATTCTGTA  
GTTTCAGAGTCAGATGTCTCCATAGGAGATAGAAGTGTGAGTAACATGAATGAAAACCTAG  
GACAGAGCTGCACAACCAGTGATTCAGATGAAGATGAAATGGAGAGCAGAGCTTCACCTG  
AGCCAGATCTGATCCTGAGAGATTACCAGATGGAAGTTGCAAAGCCAGCACTGAATGGGG  
AGAATATTATAATATGTCTCCCTACAGGCAGTGGTAAAACCAGAGTAGCTGTTTACATTACC  
AAAGATCATTTGGATAAGAAGAAAAGAGCATCAGAGCCCGGAAAAGTTATAGTACTTGTTAA  
TAAGGTACCATTGGTAGAGCAGCATTTACGAAAGGAGTTTAATCCATTCCCTGAAGCGTTGG  
TATCAGGTTATTGGTTTAAAGTGGTGATTCTCAGCTGAAAATCTCATTTCCCTGAAGTTGTCAG  
AAGAAATGATGTCATCATCAGTACAGCGCAGATCCTTGAGAATTCATTGTTAAATGCAGCCA  
AAGAAGATGAAGAAGGTGTCCAGTTATCAGATTTTTCACTCATCATTATCGATGAGTGTCAT  
CACACTCAAAGGAAGGTGTCTACAACAATATAATGCGACGTTACTTAAAAGAAAAGATGAA  
GAACAGGAAGCTGGCAAAAGAAAACAAACCACTGATCCACAGCCTCAGATTCTGGGACTT  
ACAGCCTCACCTGGTGTAGGAGGTGCAACATCCTACTCAAAGCTGAAGAACATATTCTGA  
AAATCTGTGCCAATCTTGATGCATGTAGAATCATGACTGTTGAAGAGCATGCCTCCCAATTG  
AAGAATCAGGTGAAGGAACCATATAAGAAGACTGTGATTGCAGATGACAAAAGAAGGGATC  
CATTTAGAGAGAGAATTACTGACATCATGACAGACATTCAAACTATTGCCAGCTCCATCCA  
AAATCTGAGTTTGGAACTCAGCCATATGAACAGTGGGTGATTAGAGAAGAGAGAAGAGCTG  
CAAAAGAAGAAAAACGCAAGGAACGTGTGTGTGCAGAACACTTGAAGAAATACAATGATGC  
TCTCCAGATAAATGACACCATCCGAATGGTAGATGCGTACAATCACCTAAATAACTTTTATA  
AGGAGGAGAAAAGTAAGAAGACAGTAAGGAGTGATGATGATGATGAACCAGCAGTATCAA  
AACAGGATGAAACAGATGAATTTCTAATAGCTTTGTTTCATGCAAAAAAGAAACAGCTGAAA  
GAGTTGGCTAGAAAGCCAGAATATGAAAATGAGAAGCTAATACAGTTGCGAAACACTTTAA  
TGGAGGAGTTCACGAAGACTGAAGAACCTAGAGGAATCATTTTCACAAAGACTCGGCTAAG  
TGCCTTTGCTTTATTCCAGTGGATTAAGGATAACCCAAAATTTGAAGAAGTGGGAATTAAGG  
CCCATTATCTTATTGGTGCTGGACATAACAGTGAAATTAACCCATGACTCAGAATGAGCAA  
AGGGAAGTTATTGATAAATTCCGAAGTGGAATGTAAATTTACTTATTGCTACTACTGTAGC  
TGAGGAAGGCCTAGACATCAAAGAATGTAAACATCGTTATTGCTATGGCCTCGTCACCAAT  
GAAATTGCTATGGTGCAGGCTCGTGGTCGAGCTCGAGCTGATGAGAGCACCTATGCACTT  
GTGGCTTCGAGTGGCTCAGGAGCTGTTGAACGCGAAGATGTTAATATTTTCCGTGAGAAAA  
TGATGTATAAGGCCATTACGCGTGTCCAAAAGATGCCGCAGGAAGAGTATTTAAATAAGAT  
TCAGAATTTCCAGTTGCAAAGTATAGTGGA AAAACAAATGAAGGCAAAGAGAGATCAGCGC

AAGACATACAACAAAAATCCTTCACTAATAACATTCTTATGCAAAAATTGCCACAAGCTGGT  
ATGTTCTGGAGAAGACATACAGGTTATTGAAAACATGCATCATGTCAGTGTGAAAAAAGAYT  
TCCAAAGCCTTTACCATACAAGAGAAAATAAGACACTGCAAGATAAGCATGCCGATTACCA  
GATAAATGGGGAAATTATATGTAAAGATTGTGGACAAGCTTGGGGAAATATGATGGTTCAC  
CGAGGTCTTGACCTGCCTTGTCTAAAGATTAGAAATTTTGTGGTTGTGTTTGAAGACAAGAA  
AACAAACAAAGCAAATGTTTAAGAAATGGGGGAGAACTGCCTGTCAGGTTCCCTAATTTTGATT  
ATGCAGCTCATTGTCCTTCAAGTGATGAAGAT

>haliaeetus\_leucocephalus-falconiformes-mda5

ATGGCAGCGGAGACCCGAGACGAGCGCTTCTCTACATGATCTCCTGCTTCAGGCCGCGG  
CTGAAGCAGGTCATCCGCGTGCAGCCGGTGCTGGACCGGCTTCCCTCGCTGAGCGCGGA  
GGAGAGGGGAGAAGGTGCGGGCGGCCGCCCTGCAGCGGGGCGAGGTGGAGGGGGCGGA  
GGAGCTGCTGCGGGCCGTGGAGCGGGGGCCCCGCGGGTGCGGCTGTTCCACGAGTTC  
CTGCAGGCGCTGGAGCACGGCGGCTGCAGCCTGGCCGCCTGCTACGTGAACCCAGCCT  
CAGCCAGCTGCCCTCGCCGGCCGAGGAGGCCGACCACGACCTCTGCGTGCATTGGTGC  
AGCTGCTCCACAGCACGCTGGTGGATAAAATGCAGACCATGCAGGTGGCCGAGAAGTGCT  
TGCAGATGGGCATCTTCCAGGACGAGGACCTGGATCGGATCCCACTGTTACTGACAATC  
GTGGGAACAGAGATGGTGCAAGGGAGCTACTGAGCAGAATAGTGCATAAGAAAGATTGGT  
TCTCTCCTTTTTTGGATTGCTCTGCGTGAAACCCAGCATGGAGGCCTTGCGATGATTTAAG  
CGGAAATACAGGAGGAACAGAGAATAGACAAGATGGGATGAAGAACAGTACAAATGAAGA  
AACAGAAGTTATAAGCCAACCAGGATATGCCGTAGTAGAGGATTTGAAACAGCAAGAAAAC  
GTGAATGAAAGTTTCAGCAGTGAGAACAGTGTATTGGAAGCATGTATTGGAACGAATTCTG  
TAGTTTCAGAGTCAGATGTCTCCATAGGAGATAGAAGTGTGAGTAACATGAATGAAAACCTA  
GGACAGAGCTGCACAACCAGTGATTGAGATGAAGATGAAATGGAGAGCAGAGCTTCACCT  
GAGCCAGATCTGATCCTGAGAGATTACCAGATGGAAGTTGCAAAGCCAGCACTGGATGGG  
GAGAATATTATAATATGTCTCCCTACAGGCAGTGGTAAAACCAGAGTGGCTGTTTACATTAC  
CAAAGATCATTTGGATAAGAAGAAAAGAGCATCAGAGCCCGGAAAAGTTATAGTACTTGTT  
AATAAGGTACCATTGGTAGAGCAGCATTTACGAAAGGAGTTTAATCCATTCCTGAAGCGTT  
GGTATCAGGTTATTGGTTTAAAGTGGCGATTCTCAGCTGAAAATCTCATTTTCTGAAGTTGTC  
AGAAGAAATGATGTCATCATCAGTACAGCGCAGATCCTTGAGAATTCATTGTTAAATGCAGC  
CAAAGAAGATGAAGAAGGTGTCCAGTTATCAGATTTTTCTACTCATCATTATCGATGAGTGTG  
ATCACACTCAAAGGAAGGTGTCTACAACAATATAATGCGACGTTACTTAAAAGAAAAGATG  
AAGAACAGGAAGCTGGCAAAGAAAACAAACCACTGATCCACAGCCTCAGATTCTGGGA  
CTTACAGCCTCACCTGGTGTAGGAGGTGCAACATCCTACTCAAAGCTGAAGAACATATTC  
TGAAAATCTGTGCCAATCTTGATGCATGTAGAATCATGACTGTTGAAGAGCATGCCTCCCA  
ATTGAAAAATCAGGTGAAGGAACCATATAAGAAGACTGTGATTGCAGATGACAAAAGAAGG  
GATCCATTTAGAGAGAGAATTACTGAGATCATGACAGACATTCAAACCTATTGCCAGCTCCA  
TCCAAAATCTGAGTTTGGAACTCAGCCATATGAACAGTGGGTGATTAGAGAAGAGAGAAGA  
GCTGCAAAGAAAGAAAAACGCAAGGAACGTGTGTGTGCAGAACACTTGAAGAAATACAATG  
ATGCTCTCCAGATAAATGACACCATCCGAATGGTGGATGCGTACAATCACCTAAATAACTTT  
TATAAGGAGGAGAAAAGTAAGAAGACAGTAAGGAGTGATGATGATGATGAACCAGCAGTAT  
CAAACAGGATGAAACAGATGAATTTCTAATAGCTTTATTTTCATGCAAAAAAGAAACAGCTG  
AAAGAGTTGGCTAGAAAGCCAGAATATGAAAATGAGAAGCTAATACAGTTGCGAAACACTT  
TAATGGAGGAGTTACGAAGACTGAAGAACCTAGAGGAATTATTTTCACAAAGACTCGGCT  
AAGTGCCTTTGCTTTATTCCAGTGGATTAAGGATAACCCAAAATTTGAAGAAGTGGGAATTA

AGGCCCATATCTTATCGGTGCTGGACATAACAGTGAAATTAACCCATGACTCAGAATGA  
GCAAAGGGAAGTTATTGATAAATTCCGAAGTGGAATGTAAATTTACTTATTGCTACTACTG  
TAGCTGAGGAAGGCCTAGACATCAAAGAATGTAACATCGTTATTCGCTATGGCCTCGTCAC  
CAATGAAATTGCTATGGTGCAGGCTCGTGGTTCGAGCTCGAGCTGATGAGAGCACCTATGC  
ACTTGTGGCTTCGAGTGGCTCAGGAGCTGTTGAACGCGAAGATGTTAATATTTTCCGTGAG  
AAAATGATGTATAAGGCCATTGAGCGTGTCCAAAAGATGCCACAGGAAGAGTATTTAAATAA  
GATTCAGAATTTCCAGTTGCAAAGTATAGTGGA AAAACAAATGAAGGCAAAGAGAGATCAG  
CGCAAGACATACAACAAAAATCCTTCACTAATAACATTCTTATGCAAAAATTGCCACAAGCT  
GGTATGTTCTGGAGAAGACATACAGGTTATTGAAAACATGCATCATGTCAGTGTGAAAAA  
GATTTCCAAAGTCTTTACCATACAAGAGAAAAATAAGACACTGCAAGATAAGCGTGCCGATTA  
CCAGATAAATGGGGAAATTATATGTAAAGATTGTGGACAAGCTTGGGGAAATATGATGGTT  
CACCGAGGTCTTGACCTGCCTTGTCTAAAGATTAGAAATTTTGTGGTTGTGTTTGAAGACAA  
GAAAACAACAAAGCAAATGTTTAAGAAATGGGGAGAACTGCCTGTCAAGTTCCCTAATTTTG  
ATTATGCAGCTCATTGTCCTTCAAGTGATGAAGAT

>nipponia\_nippon-ciconiiformes-mda5

ATGGCAGAGGAGTCCCGAGACGAGCGCTTCCTCTACATGATCTCCTGCTTCAGGCCGCGG  
CTGAAGCAGTTCATCCGGGTGCAGCCGGTGTGGACCGGCTTCCTCGCTGAGCGCAGA  
GGAGAGGGAGAGGGTGCGGGCGGCCGCCCTGCAGCGGGGCGAGGTGGAGGGGGCGGA  
GGAGCTGCTGCGGGCCGTGGAGCGGGGACCCCGGGGCTGCGGCTGTTCCGGGAGTTC  
CTGCAGGCGCTGGGCCGCGGGCGGCTGCAGCCTGGCCGCCTGCTACGTGAACCCAGCC  
TCAGCCAGTTGCCCTCGCCGGCCGAGGAGGCCGACCACGACCTCTGCGTGCACCTTGGTG  
CAGCTGCTCCACAGCACACTGGTGGATAGAATGCAGACCATACAGGTGGCCGAGAAGTGC  
CTGCAGATGGGCATATTCCAGGACGAGGACCTGGATCGGATCCCACTGTTACTGAGTAT  
CATGGGAACAGAGATGGTGC AAGGGAGCTATTGAGCAGAATAGTGCAGAAGAAAGACTGG  
TTCTCTCCTTTTTTGATTGCTCTGCGTGAAACCCAACATGGAGACCTTGCAGATGATTTAAG  
CGGAAGTACAGGAGGAACAGAGAATAGACAAAATGGGATGAAGAATAGTACAAACGAAGA  
AACAGAAGTTACAAGCCAACCAGGATATGCCATAGTGGAGGATTTGAAACAGCAAGAAGAC  
GTGAATGATAGTTTTCAGCAGTGAGAACAGTGTATTGGAAACATCTATTGGAAAGAATTCTGT  
AGTTTCAGAGTCAGATGTCTCCATAGGAGATGGAAGTGTGAGTAACCTTGAATGAAAACCTG  
GGACAGAGCTGCACAACCAGTGATTGAGATGACAGTGAATTGGAGAGCAGAGCTTCACCT  
GAGCCAGATCTGATCCTGAGAGATTACCAGATGGAAGTTGCAAAGCCAGCACTGAATGGG  
CAGAATATTATAATATGTCTCCCTACCGGCAGTGGTAAAACCAGAGTGGCTGTTTACATTAC  
CAAAGATCACTTGGATAAGAAGAAAAGAGCATCAGAGCCTGGAAAAGTTATAGTACTTGTT  
AATAAGGTACCGTTGGTAGAACAGCATTTACGAAAGGAGTTTAATCCATTCCCTGAAGCGTT  
GGTATCAGGTTATTGGTTTAAGTGGTGAATTCTCAGCTGAAAATCTCATTTCTGAAGTTGTC  
AGAAGAAATGATGTCATCATCAGTACAGCACAGATCCTTGAGAATTCAGTGTTAAATGCAGC  
CAAAGAAGATGAAGAAGGTGTCTACTTATCAGATTTTTCACTCGTCATTATCGATGAGTGTC  
ATCACACTCAAAGGAAGGTGTCTACAACAATATAATGCGACGTTACTTAAAAGAAAAGATG  
AAGAACAGGAAGCTGGCGAAAGAAAACAAACCACTGATCCCACTGCCTCAGATTCTGGGA  
CTTACAGCCTCACCTGGTGTAGGAGGTGCAACATCCTACTCAAAGCTGAAGAACATATTC  
TGAAAATCTGTGCCAATCTTGATGCATGTAGAATCATGACTGTTTCAGGAGCATGCCTCCCA  
ACTGAAGAATCAGGTGAAGGAACCGTATAAGAAGACTGTGATTGCAGATGACAAAAGAAGG  
GATCCATTTAGAGAGAGAATTACTGAGATCATGACAGACATTCAAACACTATTGCCAGCTCCA  
TCCAAAATCTGAGTTTGGAACCTCAGCCGTATGAACAGTGGGTGATTAGAGAAGAGAGAAGA

GCTGCAAAAGAAGAAAAGCGCAAGGAACGTGTCTGTGCAGAACACTTGAAGAAATACAATG  
ATGCTCTCCAGATAAATGACACCATCCGGATGGTGGATGCATACAATCACCTAAATAACTTT  
TATAAGGAGGAGAAAAGTAAGAAGACAGTAAGGAGTGATGATGATGATGAACCAGCAGTGT  
CAAAACAGGATGAAACAGATGAATTTCTAATAGGTTTATTTTCATGCAAAAAAGAAACAGCTG  
AAAGAGTTGGCTAGAAAGCCAGAATATGAAAATGAGAAGCTAATACAGTTGCGAAACACTT  
TAATGGAGGAGTTCACGAAGACTGAGGAACCTAGAGGAATTATTTTCACAAAGACTCGGCT  
AAGTGCTTTTGTCTATTCCAGTGGATTAAGGATAACCCAAAATTTGAAGAAGTGGGAATTA  
AGGCCCATTTATCTTATCGGTGCTGGACATAACAGTGAAATTAAACCCATGACTCAGAATGA  
GCAAAGGGAAGTTATTGATAAATCCGAGGTGGAATGTAAATTTACTTATTGCTACAACTG  
TAGCTGAGGAAGGCCTAGACATCAAAGAGTGCAACATTGTTATTCGCTATGGCCTCGTCAC  
CAATGAAATTGCTATGGTGCAGGCTCGTGGTCGAGCTCGAGCTGATGAGAGCACCTATGC  
ACTTGTGGCTTCGAGTGGCTCAGGAGCTGTTGAACGTGAAGATGTTAATATTTTCCGTGAG  
AAAATGATGTATAAGGCCATCCAGAGTGTCCAGAAGATGCCACAAGAAGAGTATTTAAATA  
AGATTCAGAATTTCCAGTTGCAAAGTATAGTGGAAAAACAAATGAAGGCAAAGAGAGATCA  
GCGCAAGACATACAAGAAAAATCCTTCACTAATAACATTCCTATGCAAAAATTGCCACAAGC  
TGATATGTTCTGGAGAAGACATACAAGTTATTGAAAACATGCATCATGTCAGTGTGAAAAAA  
GATTTCCAAAGTCTTTACCATACAAGAGAAAAATAAGACACTGCAAGATAAGCATGCAGATTA  
CCAGACAAATGGGGAAATCATATGTAAAGATTGTGGACAAGCTTGGGGAAATATGATGGTT  
CACCGAGGTCTTGACCTGCCTTGTCTAAAGATTAGAAATTTTGTGGTTGTGTTTGAAGACAA  
GAAAACAACAAAGCAAATTTTAAAGAAATGGGGAGAACTGCCCATCAGGTTCCCTAGTTTT  
GATTATGCAGCTCATTTTCCTTCAAGTGATGAAGAT

>fregetta\_grallaria-procellariiformes-md5

ATGGCAGAGGCGTCCCGAGACGAGCGCTTCCTCTACTTGATCTCCTGCTTCAGGCCGCGG  
CTGAAGCAGTTCATCCGGGTGCAGCCGGTGCTGGACCGGCTTCCTCGCTGAGCGCAGA  
GGAGAGGGAGAGGGTGCGGGCGATCGCCCTGCAGCGGGGCGAGGTGGAGGGGGCGGG  
GGAGCTGCTGCGGGCCGTGGAGCGGGGGCCCCGCGGGTGCGGCTGTTCCACGAATTC  
CTGCAGGCGCTGGAGTACGGCGGCTGCAGCTTGGCTACCTGCTACGTGAACCCTAGCCT  
CAGCCAGCTGCCCTCGCCGGCCGAGGAGGCCGACCACGACCTCTGCGTGCATTGGTGC  
AGCTGCTCCACAGCACACTGGTGGATAAAATGCAGACCATGCAGGTGGCCGAGAAGTGCC  
TGCAGATGGGCATCTTCCAGGATGAGGACCTGGATCGGATCCCACTGTTACTGACAATC  
GTGGGAACAGAGAAGGTGCAAGGGAGCTATTGAGCAGAATAGTGCAGAAGAAAGATTGGT  
TCTCTCCTTTTTTATTGCTCTGCGTGAAACCCAACATGGAGGCCTTGCAGATGATTTAAGT  
GGAAATACAGGAGGAACAGAGAATACACAAAATGGGATGAAGAACAGTACAAACGAAGAA  
ACAGAAGTTACAAACCAACCAGGATATGCCGTAGTGGAGGATTTGAAACAACAAGAAAATA  
TGAATGATAGTTTCAGCAGTGAGAACAGTTTATTGGAAGCATCTGTTGGAAAGAATTCTGTA  
GTTTCAGAGTCAGATGTCTCCATAGGAGATGGAAGTGTGAGTAACCTTGAATGAAAACCTGG  
GACAGAGCTGCACAACCAGTGATTCAGATGAAGATGAAGTGGAGAGCAGAGCTTCACCTG  
AGCCAGATCTGATCCTGAGAGATTACCAGATGGAAGTTGCAAAGCCAGCATTGAATGGGG  
AAAATATTATAATATGTCTTCTACAGGCAGTGGTAAAACCAGAGTGGCTGTTTACATTACC  
AAAGATCACCTGGATAAGAAGAAAAGAGCATCAGAGCCTGGAAAAGTTATAGTACTTGTTA  
ATAAGGTACCGTTGGTAGAACAGCATTTACGAAAGGAGTTTAATCCATTCTGAAGCGTTG  
GTATCAGGTTATTGGTTTAAAGTGGTGATTCTCAGCTGAAAATCTCATTTCTGAAGTTGTCA  
GAAGAAATGATGTCATCATCAGTACAGCACAGATCCTTGAAAATTCAGTGTAAATGCAGCC  
GAAGAAGATGAAGAAGGCGTCCACTTATCAGATTTTTTCACTCATCATTATCGATGAGTGTCA

TCACACTCAAAGGAAGGTGTCTACAACAATATAATGAGACGTTACTTAAAAGAAAAGATGA  
AGAACAGGAAGCTGGCAAAGAAAACAAACCGCTGATCCACAGCCTCAGATTCTGGGAC  
TTACGGCCTCACCTGGTGTAGGAGGTGCAACATCCTACTTAAAAGCTGAAGAACATATTCT  
GAAAATCTGTGCCAATCTTGATGCATGTAGAATCATGACTGTTGAAGAGCATGCTTCCCAA  
CTGAAGAATCAGGTGAAGGAACCGTATAAGAAGACTGTGATTGCAGATGACAAAAGAAGG  
GATCCATTTAGAGAGAGAATTACTGAGATCATGACAGACATTCAAAGTATTGCCAGCTCTA  
TCCAAAATCTGAATTTGGAACCTCAGCCATATGAACAGTGGGTGATTAGAGAAGAGAGAAGN  
NCTGCAAAGAAGAAAAACGCAAGGAACGCGTCTGTGCAGAACACTTGAAGAAATACAATG  
ATGCTCTCCAGATAAATGACACCATCCGAATGGTGGATGCGTACAATCACCTAAATAACTTT  
TATAAGGAGGAGAAAAAGTAAGAAGACAATAAGGAGTGATGATGATGATGAACCAGCAGTAT  
CAAACAGGATGAAACAGATGAATTTCTAATAGGTTTATTTACACAAAAAAGAAACAGCTG  
AAAGAGTTGGCTAGAAGGCCAGAATATGAAAATGAGAAGCTAATACAGTTGCGAAACACTT  
TAATGGAGGAGTTACGAAGACTGAAGAACCTAGAGGAATTATTTTACAAAGACTCGGCT  
AAGTGCCTTTGCTCTATTCCAGTGGATTAAGGATAACCCAAAATTTGAAGAAGTGGGAATTA  
AGGCCCATTTATCTTATCGGTGCTGGACATAACAGTGAAATTAACCCATGACTCAGAACGA  
GCAAAGGGAAGTTATTGATAAATCCGAGGTGGAAATGTAAATTTACTTATTGCCACTACTG  
TAGCTGAGGAAGGCCTAGACATCAAAGAGTGTAACATCGTTATTCGCTATGGTCTCGTCAC  
CAATGAAATTGCTATGGTGCAGGCCCGCGGTGAGCTCGAGCTGATGAAAGCACCTATGC  
ACTTGTGGCTTCAAGTGGCTCAGGAGCTGTTGAACGTGAAGATGTTAATATTTTCCGTGAA  
AAAATGATGTATAAGGCCATTGAGCATGTTGAGAAGATGCCACAGGAGGAGTATTTAAGTA  
AGATTCAGAATTTCCAAGTGCAAAGTATAGTGGAAAAACAAATGAAGGCAAAGAGAGATCA  
GCGCAAGACATACAAGAAAAATCCTTCACTAGTAACATTCCCTATGCAAATTTGCCACAAGC  
TGATATGTTCTGCAGAAGACATACAAGTTATTGAAAACATGCATCATGTCAGTGTGAAAAAA  
GATTTCCAAAGTCTTTATCATACAAGAGAAAAATAAGACACTGCAAGATAAGCATGCCGATTA  
CCAGACAAATGGAGAAATTATATGTAAAGATTGTGGACAAGCTTGGGGAAATATGATGGTT  
CACCGAGGTCTTGACCTGCCTTGTCTAAAGATTAGAAATTTTGTGGTTGTGTTTGAAGACAA  
GAAAACAACAAAGCAAATTTTTTAAGAAATGGGGGGAAGTGGCCATCAGTTTTCTAGTTTTG  
ATTATGCAGCTCATTGGCCTTCAAGTGATGAAGAT

>oceanites\_oceanicus-procellariiformes-mda5

ATGGCAGAGGCGTCCCGAGACGAGCGCTTCCTCTACATGATCTCCTGCTTCAGGCCGCGG  
CTGAAGCAGTTCATCAGGGTGCAGCCGGTGTGACCGGCTTCCCTTGCTGAGCGCAGC  
GGAGAGGGAGCAGGTGCGGGCCGTGCGCCCTGCAGCGGGGCGAGGTGGAGGGGGCGGA  
GGAGCTGCTGCGGGCCGTGGAGCGGGGGCCCCGCGGGTGCAGCTGTTCCACGAATTC  
CTGCAGGCGCTGGAGCACGGCGGCTGCAGCTTGGCTACCTGCTACGTGAACCCTAGCCT  
CAGCCAGCTGCCCTCGCCGGCCGAGGAGGCCGACCACGACCTCTGCGTGCACCTTGGTGC  
AGCTGCTCCACAGCACACTGGTGGATAAAATGCAGACCATGCAGGTGGCCGAGAAGTGCC  
TGCAGATGGGCATCTTCCAGGATGAGGACCTGGATCGGATCCACACTGTTACTGACAATC  
GTGGAAACAGAGATGGTGCAAGGGAGCTATTGAGCAGAATAGTGCAGAAGAAAGATTGGT  
TCTCTCCTTTTTTGGTTGCTCTGCGTGAAACCCAACATGGAGGCCTTGCAGATGATTTAAGT  
GGAAATACGGGAGGAATAGAGAATACACAAAATGGGATGAAGAACAGTACAAATGAAGAAA  
CAGTAGTTACAAACCAACCAGGATATGCTGTAGTGGAGGATTTGAAACAACAAGAAAATGT  
GAATGATAGTTTCAGCAGTGAGAACAGTTTATTGGAAGCATCTGTTGAAAGAATTCTGTAG  
TTTCAGAGTCAGATGTCTCCATAGGAGATGGAAGTGTGAGTAACTTGAATGAAAACCTGGG  
ACAGAGCTGCACAACCAGTGATTCAGATGAAGATGAAGTGGAGAGCAGAGCTTCACCTGA

GCCAGATCTGATCCTGAGAGATTACCAGATGGAAGTTGCAAAGCCAGCACTGAATGGGGA  
GAATATTATAATATGTCTCCCTACAGGCAGTGGTAAAACCAGAGTGGCTGTTTACATTACCA  
AAGATCACCTGGATAAGAAGAAAAGAGCATCAGAGCCTGGAAAAGTTATAGTACTTGTTAA  
TAAGGTACCGTTGGTAGAACAGCATTTACGAAAGGAGTTTAATCCATTCTGAAGCGTTGG  
TATCAGGTTATTGGTTTAAGTGGTGATTCTCAGCTGAAAATCTCATTTCCTGAAGTTGTCAG  
AAGAAATGATGTCATCATCAGTACAGCACAGATCCTTGAAAATTCAGTGTAAATGCAGCYG  
AAGAAGATGAAGAAGRTGTCCATTTATCAGATTTTTCTACTCATCATTGTGCGATGAGTGTCAT  
CACACTCAAAGGAAGGTGTCTACAACAATATAATGAGACGTTACTTAAAGAAAAGATGAA  
GAACAGGAAGCTGGCAAAGAAAACAAACCGCTGATCCACAGCCTCAGATTCTGGGACT  
TACAGCCTCACCTGGTGTAGGAGGTGCAACATCCTACTTAAAGCTGAAGAACATATTCTG  
AAAATCTGTGCCAATCTTGATGCATGTAGAATCATGACTGTTGAAGAGCATGCTTCCCACT  
GAAGAATCAGGTGAAGGAACCGTATAAGAAGACTGTGATTGCAGATGACAAAAGAAGGGA  
TCCATTTAGAGAGAGAATTACTGAGATCATGACAGACATTCAAACCTATTGCCAGCTCCATC  
CAAATCTGAGTTTGGAACCTCAGCCATATGAACAGTGGGTGATTAGAGAAGAGAGAAGAGC  
TGCAAAAGAAGAAAAACGCAAGGAACGTGTCTGTGCAGAACACTTGAAGAAATACAATGAT  
GCTCTCCAGATAAATGACACCATCCGAATGGTGGATGCGTACAATCACCTAAATAACTTTTA  
TAAGGAGGAGAAAAGTAAGAAGACAATAAGGAGTGATGATGATGATGAACCAGCAGTATCA  
AAACAGGATGAAACAGATGAATTTCTAATAGGTTTTATTTACACAAAAAAGAAACAGCTGAA  
AGAGTTGGCTAGAAGGCCAGAATACGAAAATGAGAAGCTAATACAGTTGCGAAATACTTTA  
ATGGAGGAGTTCACGAAGACTGAGGAACCTAGAGGAATTATTTTCACAAAGACTCGACTAA  
GTGCCTTTGCCCTATTCCAGTGGATTAAGATAACCCAAAATTTGAAGAAGTGGGAATTAAG  
GCCCATTATCTTATCGGTGCTGGACATAACAGTGAAATTAACCCATGACTCAGAACGAGC  
AAAGGGAAGTTATTGATAAATTCCGAGGTGGGAATGTAAATTTACTTATTGCCACTACTGTA  
GCTGAGGAAGGCCTAGACATCAAAGAGTGTAACATCGTTATTGCTATGGTCTTGTCACCA  
ATGAAATTGCTATGGTGCAGGCCCGCGGTGAGCTCGAGCTGATGAAAGCACCTATGCAC  
TTGTGGCTTCAAGTGGCTCAAGAGCTGTTGAACGTGAAGATGTTAATATTTTCCGTGAAAAA  
ATGATGTATAAGGCCATTACAGCATGTCCAGAAGATGCCACAGGAGGAGTATTTAAATAAGA  
TTCAGAATTTCCAAGTGCAAAGTATAGTGGAAAAACAAATGAAGGCAAAGAGAGATCAGCG  
CAAGACATACAAGAAAAATCCTTCACTAGTAACATTCCCTATGCAAAAATTGCCACAAGCTGA  
TATGTTCTGGAGAAGACATACAAGTTATTGAAAACATGCATCATGTGAGTGTAAGAAAGAT  
TTCCAAAGTCTTTATCATACAAGAGAAAAATAAGACACTGCAAGATAAGCATGCCGATTACCA  
GACAAATGGGGAAATTATATGTAAAGATTGTGGACAAGCTTGGGGAAATATGATGGTTCAC  
CGAGGTCTTGACCTGCCTTGTCTAAAGATTAAAAATTTTGTGGTTGTGTTTGAAGACAAGAA  
AACAACAAAGCAAATTTTAAAGAAATGGGGAGAACTGCCCATCAGGTTTCCTAGTTTTGATT  
ATGCAGCTCATTGGCCTTCAAGTGATGAAGAT

>hydrobates\_tethys-procellariiiformes-md5

ATGGCAGAGGAGTCCCGGGACGAGCGCTTCCTCTACCTGATCTCCTGCTTCAGGCCGCG  
GCTGAAGCAGTTCATCCGGGTGCAGCCGGTGCTGGACCGGCTTCCCTCGCTGAGCGTAG  
GGGAGAGGGAGAAGGTGCGGGCGGCCGCCCTGTACGGGGGCGAGGTGGAGGGGGCGG  
AGGAGCTGCTGCGGGTCGTGGAGCGGGGGCCCCGCGGGTGCGGCTGGTTCAACGAATT  
CCTGCAGGCGCTGGAGTACGGTGGCTGCAGCCTGGCTACCTGCTACGTGAACCCAGCC  
TCAGCCAGCTGCCCTCGCCGGCGGAGGAGGCCGACCACGACCTCTGCGTGCACTTGGTG  
CAGCTGCTCCACAGCACACTGGTGGATAAAATGCAGACCATGCAGGTGGCCGAGAAGTGC  
CTGCAGATGGGCATCTTCCAGGACGAGGACCTGGATCGGATCCACACTGTTACTGACAAT

CGTGGGAACAGAGATGGTGCAAGGGAGCTATTGAGCAGAATAGTGCAGAAGAAAGATTGG  
TTCTCTCCTTTTTTTGATTGCCCTGCGTGAAACCCAACATGGAGGCCTCGCAGATGATTTAA  
GCGGAAATACAGGAGGAGCAGAGAATAGACAAAATGAGATGAAGAACAGTACAAACGAAG  
AAACAACAGTTACAAGCCAACCAGGATATGCCGTAGTGGAGGATTTGAAACTGCAAGAAAA  
TGTGAATGATAGTTTCAGCAGTGAGAACAGTGTATTGAAAGCATCTATTGGAAAGAATTCTG  
TAGTTTCAGAATCAGATGTCTCCATAGGAGATGGAAGTGTGAGTAACTTGAATGAAAACCT  
GGGACAGAGCAGCACAAACCAGTGATTGAGATGAAGATGAAGTGGAGAGCAGAGCTTCACC  
TGAGCCAGATCTGATCCTGAGAGATTACCAGATGGAAGTTGCAAAGCCAGCGCTGAATGG  
GGAGAATATTATAATATGTCTCCCCACAGGCAGTGGTAAAACCAGAGTGGCTGTTTACATT  
ATCAAAGATCACTTGGATAAGAAGAAAAGAGCATCAGAGCCTGGGAAAGTTATAGTACTTG  
TTAATAAGGTACCGTTGGTAGAACAGCATTTACGAAAGGAGTTTAATCCATTCTGAAGCAT  
TGGTATCAGGTTATTGGTTTAAAGTGGTGATTCTCAGCTGAAAATCTCATTTCCTGAAGTTGT  
CAGGGGAAATGATGTCATCATCAGTACAGCACAGATCCTTGAGAATTCAGTGTACATGCA  
GCCGAAGAAGATGAAGAAGGTGTCCACTTGTGAGATTTTTCACTCATCATTATCGATGAGT  
GTCATCACACTCAAAGGAAGGCGTCTACAACAATATAATGCGACGTTACTTGAAAGAAAA  
GATGAAGAACAGGAAGCTGGCAAAGAAAACAAACCACTGATCCCACAGCCTCAGATTCTG  
GGACTTACAGCCTCACCTGGTGTAGGAGGTGCAACATCCTACTCAAAGCTGAAGAACATA  
TTCTGAAAATCTGTGCCAATCTTGATGCATGTAGAATCATGACTGTTGAAGAGCATGCCTCC  
CAATTGAAGAATCAGGTGAAGGAACCGTATAAGAAGACTGTGATTGCAGATGACAAAAGAA  
GGGATCCATTTAGAGAGAGAATTACTGAGATCATGACAGACATTCAAACCTATTGCCAGCT  
CCATCCAAAACCTGAGTTTGGAACCTCAGCCATATGAACAGTGGGTGATTAGAGAGGAGAGA  
AGAGCTGCAAAAAGAAAAACGCAAGGAACGTGTCTGTGCAGAACTTGAAGAAATACA  
ATGATGCTCTCCAGATAAATGACACCATCCGAATGGTGGATGCGTACAATCACCTAAATAA  
CTTTTATAAGGAGGAGAGAAAAGTAAGAAGACAGTAAGGAGTGATGATGATGAACCAGCA  
GTATCAAAACAGGATGAAACAGATGAATTTCTAATGGGTTTGTTTCATGCAAAAAAGAAACA  
GCTGAAGGAGTTGGCTAGAAAGCCAGAATATGAAAATGAGAAGCTAATACAGTTGCGAAAC  
ACTTTAATGGAGGAGTTCACGAAGACTGAGGAACCTAGAGGAATTATTTTCACAAAGACTC  
GGCTAAGTGCCTTTGCTCTATTCCAGTGGATTAAGGATAACCCAAAATTTGAAGAAGTGGG  
AATTAAGGCCCATATCTTATTGGCGCTGGACATAACAGTGAAATTAACCCATGACTCAGA  
ATGAGCAAAGGGAAGTTATTGATAAATTCCGAGGTGGAAATGTAACTTACTTATTGCTACT  
ACTGTAGCTGAGGAAGGCCTAGACATCAAGGAGTGTAACATCGTTATTCGCTATGGCCTCG  
TCACCAATGAAATTGCTATGGTGCAGGCTCGCGGTGAGCTCGAGCTGATGAGAGCACCT  
ATGCACTTGTGGCTTCGAGTGGCTCAGGAGCTGTTGAACGTGAAGATGTTAATATTTTCCG  
TGAAAAAATGATGTATAAGGCCATTCAGCATGTCCAGAAGATGCCGCAGGAAGAGTATTTA  
AATAAGATTCAGAATTTCCAGTTGCAAAGTATAGTGGAACAAATGAAGGCAAAGAGAG  
ATCAGCGCAAGACATACAAGAAAAATCCTTCACTAGTGACATTCCTATGCAAAAATTGCCAC  
AAGCTGGTATGTTCTGGAGAAGACATACAAGTTATTCAAACATGCATCATGTGAGTGTGAA  
AAAAGATTTCCAAAGTCTTTACCATACAAGAGAAAAATAAGACACTGCAAGATAAGCATGCCG  
ATTACCAGACAAATGGGGAAATTATATGTAAAGATTGTGGACAAGCTTGGGGAAATATGAT  
GGTTCACCGAGGTCTTGACCTGCCTTGTCTAAAGATTAGAAATTTTGTGGTTGTGTTGAAG  
ACAAGAAA---

ACAAAGCAAATTTTTAAGAAATGGGGAGAACTGCCCATCAGGTTCCCTAGTTTTGATTATGC  
AGCTCATTGGCCTTCAAGCGATGAAGAT

>pelecanoides\_urinatrix-procellariiformes-mda5



ATGGCAGAGGAGTTCCAAGACGAGCGCTTCCTCTACATGATCTCCTGCTTCAGGCCGCGG  
CTGAAGCAGGTCATCCGGGTGCAGCCGGTGCTGGACCGGCTTCCTCGCTGAGCGCAGG  
GGAGAAGGAGAAGGTGCGGGCGGCCGCCCTGCAGCGGGGCGAGGTGGAGGGAGCGGA  
GGAGCTGCTGCGGGCCGTGGAGCGGGGGCCCCGCGGGTGCGGCTGTTCAATGAATTC  
CTGCAGGCGCTCGAGAACGGCGGCTGCAGCCTGGCTACCTGCTACGTGAACCCCAGCCT  
CAGCCAGCTGCCCTCGCCGGCCGAGGAGGCCGACCACGACCTCTGTGTGCACTTGGTGC  
AGCTGCTCCACAGCACACTGGTGGATAAAATGCAGACCATGCAGGTGGCCGAGAAGTGCC  
TGCAGATGGACATCTTCCAGGAAGAGGACCTGGATCGGATCCAACTGTTACTGACAATCG  
TGGGAACAGAGATGGTGCAAGGGAGCTATTGAGCAGAATAGTGCAGAAGAAAGATTGGTT  
CTCTCCTTTTTTGATTGCTCTGCGTGAAACTCAACATGGAGGCCTTGCAGATGATTTAAGCG  
GAAATACAGGAGGAACAGAGAATAGACAAAATGGGATGAAGAACAGTACAAACGAAGAAA  
CAGAAGTTACAAGCCAACCAGGATATGCCATAGTGGAGAATTTGAAACAGCAAGAAAATGT  
GAATGATAGTTTCAGCAGTGAGAATAGTGTATTGGAAGCATCTATTGGAAAGAATTCTGTAG  
TTTCA-----

GATGTCTCCATAGGAGATGGAAGTGTGAGTAACCTGAATGAAACCCTGGGACAGAGCTGC  
ACAACCAGTGATTCAGATGAAGATGAAGTGGAGAGCAGAGCTTCACCTGAGCCAGATCTG  
ACCCTCAGAGATTACCAGAAGGAAGTTGCAAAGCCAGCACTGAATGGGGAGAATATTATAA  
TATGTCTCCCTACAGGCAGTGGTAAAACCAGAGTGGCTGTTTACATTACCAAAGATCACCT  
GGATAAGAAGAAGAGAGCATCAGAGCCTGGAAAAGTTATAGTACTTGTTAATAAGGTACCA  
TTGGTAGAACAGCATTTACGAAAGGAGTTTAAATCCATTCTGAAGCGTTGGTATCAGGTGAT  
TGGTTTAAGTGGTGATTCTCAGCTGAAAATCTCATTTCTGAAGTTGTCAGAAGAAATGATG  
TCATCATCAGTACAGCACAGATCCTTGAGAATTCAGTGTAAATGCAGGTGAAGAAGATGA  
AGAAGGTGTCCACTTATCAGATTTTTCACTCATCATTATCGATGAGTGTGATCACACTCAA  
AGGAAGGTGTCTACAACAATATAATGCGACGTTACTTAAAAGAAAAGATGAAGAACAGGAA  
GCTGGCAAAAGAAAACAAACCACTGATCCACAGCCTCAGATTCTGGGACTTACAGCCTCA  
CCTGGTGTAGGAGGTGCAACATCCTACTCAAAAGCGGAAGAACATATTCTGAAAATCTGTG  
CCAATCTTGATGCATGTAGAATCATGACTGTTGAAGAGCATGCCTCCCAGCTGAAGAATCA  
GGTGAAGGAACCATATAAGAAGACCGTGATTGCAGATGACAAAAGAAGGGATCCATTTAGA  
GAGAGAATTACTGAGATCATGACAGACATTCAAACTATTGCCAGCTCCATCCAAAATCTGA  
GTTTGGAACCTCAGCCATATGAACAGTGGGTGATTAGAGAAGAGAGAAGAGCTGCAAAAGA  
AGAAAAACGCAAGGAACGTGTCTGTGCAGAACACTTGAAGAAATACAATGATGCTCTCCAG  
ATAAATGACACCATCCGAATGGTGGATGCGTACAATCACCTAAATAACTTTTTATAAGGAGGA  
GAAAAGTAAGAAGACAGTAAGGAGTGATGATGATGATGAACCATTAGTATCAAAACAGGAT  
GAAACAGATGAATTTCTAATAAGTTTATTTCAATCAAAAAAGAAACAGCTGAAAGAGTTGGC  
TAGAAAGCCAGAATATGAAAATGAGAAGCTAATACAGTTGCGAAACACTTTAATGGAGGAG  
TTCACGAAGACTGAGGAACCTAGAGGAATTATTTTACAAAGACTCGGCTAAGTGCCTTTG  
CTCTATTCCAGTGGATTAAAGATAACCCAAAATTGGAAGAAGTGGGAATAAAGGCCCGTTA  
TCTTATCGGTGCTGGACATAACAGTGAAATTAACCCATGACTCAGAATGAACAAAGGGAA  
GTTATTGATAAATTCCGAGGTGGAAAAGTAAATTTACTTATTGCTACTACTGTAGCTGAGGA  
AGGCCTAGACATCAAAGAGTGTAACATCGTTATTCGCTATGGCCTCGTCACCAATGAAATT  
GCTATGGTGCAGGCTCGCGGTGAGCTCGAGCTGATGAAAGCACCTATGCACTTGTGGCT  
TCGAGTGGCTCAGGAGCTGTTGAACGTGAAGATGTTAATTTTTCCGTGAAAAAATGATGT  
ATAAGGCCATTTCAGCATGTCCAGAAGATGCCACGGGAGGAGTATTTAAATAAGATTTCAGAA  
TTTCCAGTTGCAAAGTATAGTGGAAAAACAAATGAAGGCAAAGAGAGATCAGCGCAAGACA

TACAAGAAAAACCCCTTCACTAGTAACATTCTATGCAAAAATTGCCACAAGCTGATATGTTC  
TGGAGAAGACATTCAAGTTATTGAAAACATGCATCATGTCAGTGTGAAAAAGATTTCCAAA  
GTCTTTACCATACAAGAGAAAAATAAGACACTGCAAGATAAGAATGCTGATTACCAGACAAAT  
GGGGAAATTATATGTAAAGATTGTGGACAAGCTTGGGGAAATATGATGGTTCACCGTGGTC  
TTGACCTGCCTTGTCTAAAGATTAGAAATTTTGTGGTTGTGTTTGAAGACAAGAAAACAACA  
AAGCAAATTTTAAAGAAATGGGGAGAACTGCCCATTAGGTTCCCTAGTTTTGATTATGCAGC  
TCATTGGCCTTCAAGTGATGAAGAT

>calonectris\_borealis-procellariiformes-mda5

ATGGCAGAGGAGTCCCGAGACGAGCGCTTCGCTACATGATCTCCTGCTTCAGGCCGCG  
GCTGAAGCAGTTCATCCGGGTGCAGCCGGTGCTGGACCGGCTTCCCTCGCTGAGCGCAG  
AGGACAGGGAGAGGGTGCGGGCGGCCGCCCTGCTGCGGGGCGAGGTGGAGGGAGCGG  
AGGAGCTGCTGCGGGCCGTGGAGCGGGGGCCCCGCGGGTGCGGCTGGTTCCACGAATT  
CCTGCAGGCGCTGGAGCACGGCGGCTGCAGCCTGGCTACCTGCTACGTGAACCCAGCC  
TCAGCCAGCTGCCCTCGCCGGCCGAGGAGGCCGACCACGACCTCTGTGTGCACTTGGTG  
CAGCTGCTCCACAGCACACTGGTGGATAAAATGCGGACCATGCAGGTGGCCGAGAAGTGC  
CTGCAGATGGGCATCTTCCAGGACGAGGACCTGGATCGGATCCACACTGTTACTGACAAT  
CGTGGGAACAGAGATGGTGCAAGGGAGCTATTGAGCAGAATAGTGCAGAAGAAAGATTGG  
TTCTCTCATTTTTTATTGCTCTGCGTGAAACCCAACATGGAGGCCTTGCAAGATGATTTAAG  
CGGAAATACAGGCGGAACAGAGAATAGACAAAATGGGATGAAGAACAGTACAAACGAAGA  
AACAGAAGTTACAAGCCAGCCAGGATATGCAGTAGTGGAGGGTTTGAAACAGCAAGAAAAT  
ATGAATGATAGTTTCAGCAGTGAGAACAGTGTATTGGAAGCATCTATTGGAAAGAATTCTGT  
AGTTTCAGAATTAGATGTCTCCATAGAAGATGGAAGAGTCAGTAACTTGAATGAAACCCTG  
GGACAGAGCTGCACAACCAAGTGATTGAGATGAAGATGAAGTGGAGAGCAGAGCTTCACCT  
GAGCCAGATCTGACCCTCAGAGATTACCAGATGGAAGTTGCAAAGCCAGCACTGAATGGG  
GAGAATATTATACTATGTCTTCTACAGGCAGTGGTAAAACCAGAGTGGCTGTTTACATTAC  
CAAAGATCACCTGGATAAGAAGAAAAGAGCATCAGAGCCTGGAAAAGTTATAGTACTTGTT  
AATAAGGTACCGTTGGTAGAACAGCATTTACGAAAGGAGTTTAATCCATTCCTGAAGCGTT  
GGTATCAGGTTATTGGTTTAAAGTGGTGATTCTCAGCTGAAAATCTCATTTCTGAAGTTGTC  
AGAAGAAATGATGTCATCATCAGTACAGCACAGATCCTTGAGAATTCAGTTAAATGCAGC  
CGAAGAAGATGAAGAAGGTGTCCACTTATCAGATTTTCACTCATCATTATTGATGAGTGTG  
ATCACACTCAAAGGAAGGTGTCTACAACAATATTATGCGACGTTACTTAAACAAAAGATG  
AAGAACAAGAAGCTGGCAAAGAAAACAAACCAGTGATCCACAGCCTCAGATTCTGGGA  
CTTACAGCCTCACCTGGTGTAGGAGGTGCAACATCCTACTCAAAGCGGAAGAACATATTC  
TGAAAATTTGTGCCAATCTTGATGCATGTAGAATCATGACTGTTGAAGAGCATGCCTCCCAA  
CTGAAGAATCAGGTGAAGGAACCATATAAGAAGACTGTGATTGCAGATGACAAAAGAAGGG  
ATCCATTTAGAGAGAGAATTACTGAAATCATGACAGACATTCAAACTATTGCCAGCTCCAT  
CCAAAATCTGAGTTTGGAACTCAGCCATATGAACAGTGGGTGATTAGAGAAGAGAGAAGAG  
CTGCAAAAGAAGAAAAACGCAAGGAACGTGTCTGTGCAGAACACTTGAAGAAATACAATGA  
TGCTCTCCAGATAAATGACACCATCCGAATGGTGGATGCGTACAATCACCTAAATAACTTTT  
ATAAGGAGGAGAAAAAGTAAGAAGACAGTAAGGAGTGATGATGATGATGAACCATCAGTATC  
AAAACAGGATGAAACAGATGAATTTCTAATAGGTTTATTTTATTCAAAAAAGAAACAGCTGA  
AAGAGTTGGCTAGAAAGCCAGAATATGAAAATGAGAAGCTAATACAGTTGCGAAACACTTT  
AATGGAGGAGTTCACGAAGACTGAGGAACCTAGAGGAATTATTTTACAAAGACTCGGCTA  
AGTGCCCTTTGCTCTATTCCAGTGGATTAAGGATAACCCAAAATTTGAAGAAGTGGGAATTAA

GGCTCGTTATCTTATCGGTGCTGGACATAACAGTGAAATTAACCCATGACTCAGAATGAG  
CAAAGGGAAGTTATTGATAAATTCCGAGGTGGAAATGTAAATTTACTTATTGCTACTACTGT  
AGCTGAGGAAGGCCTAGACATCAAAGAGTGTAACATTGTTATTTCGCTATGGCCTCGTCACC  
AATGAAATTGCTATGGTGCAGGCTCGCGGTGAGCTCGAGCTGATGAGAGCACCTATGCA  
CTTGTGGCTTCGAGTGGCTCAGGAGCTGTTGAACGTGAAGATGTTAATATTTTCCGTGAAA  
AAATGATGTATAAGGCCATTCAGCATGTCCAGAAGATGCCACAGGAGGAGTATTTAAATAA  
GATTCAGAGCTTCCAGTTGCAAAGTATAGTGGAAAAACAAATGAAGGCCAAAGAGAGATCAG  
CGCAAGACATACAAGAAAAACCCCTTCACTAGTAACATTCCTATGCAAAAATTGCCACAAGCT  
GATATGTTCTGGAGAAGACATACAAGTTATTGAAAACATGCATCATGTCAGTGTGAAAAAAG  
ATTTCCAAAGTCTTTACCATAACAAGAGAAAATAAGACACTGCAAGATAAGCATGCTGATTAC  
CAGACAAATGGGGAAATTATATGTAAAGATTGTGGACAAGCTTGGGGAAATATGATGGTTC  
ACCGAGGTCTTGACCTGCCTTGTCTAAAGATTAGAAATTTTGTGGTTGTGTTTGAAGACAAG  
AAAACAACAAAGCAAATTTTTAAGAAATGGGGAGAAGCTGCCCATTAGGTTCCGTAGTTTTGA  
TTATGCAGCTCATTGGCCTTCAAGTGATGAAGAT

>fulmarus\_glacialis-procellariiformes-mda5\_partial

-

NNCTGCAGCCTGGCTACCTGCTACATGAACCCCAGCCTCAGCCAGCTGCCCTCGCCGGC  
CGAGGAGGCCGACCACGACCTCTGCGTGCACCTTGGTGCAGCTGCTCCACAGCACACTGG  
TGGATAAAATGCAGACCATGCAGGTGGCCGAGAAGTGCCTGCAGATGGGCATCTTCCAGG  
ACGAGGACCTGGATCAGATCCACACTGTTACTGACAATCGTGGGAACAGAGATGGTGCAA  
GGGAGCTATTGAGCAGAATAGTGCAGAAGAAAGATTGGTTCTCTACTTTTTTGATTGCTCTG  
CGTGAAACCCCAACATGGAGGCCTTGCAGATGATTTAAGCGGAAATACAGGAGGAACAGAG  
AATAGACAAAATGGGATGAAGAACAGTACAAACGAAGAAACAGAAGTTACAAGCCAACCG  
GATATGCCATAGTGGAGGATTTGAAACAGCAAGAAAATGTGAATGATAGTTTCAGCAGTGA  
GAATAGTGTATTGGAAGCATCTATTGGAAGAATTCTGTAGTTTCAGAATTAGATGTCTCCA  
TAGGAGATGGAAGTGTCAAGTAACCTGAATGAAACGCTGGGACAGAGCTGCACAACCAAGT  
ATTCAGATGAAGATGAAGTGGAGAGCAGAGCTTACCTGAGCCAGATCTGATCCTGAGAG  
ATTACCAGATGGAAGTTGCAAAGCCAGCATTGAATGGGGAGAATATTATAATATGTCTCCCT  
ACAGGCAGTGGTAAAACAGAGTGGCTGTTTACATTACCAAAGATCACCTGGATAAGAAGA  
AAAGAGCATCAGAGCCTGGAAAAGTTATAGTACTTGTTAATAAGGTACCGTTGGTAGAACA  
ACATTTACGAAAGGAGTTTAATCCATTCCTGAAGCGTTGGTATCAGGTTATTGGTTAAGTG  
GTGATTCTCAGCTGAAAATCTCATTTCTGAAGTTGTCAGAAGAAATGATGTCATCATCAGT  
ACAGCACAGATCCTTGAGAATTCAGTGTAAATGCAGCCGAAGAAGATGAAGAAGGTGTCC  
ACTTATCAGATTTTTCACTTATCATTATTGATGAGTGTATCACACTCAAAGGAAGGTGTCT  
ACAACAATATAATGCGACGTTACTTAAAAGAAAAGATGAAGAACAGGAAGCTGGCAAAAAGA  
AAACAAACCACTGATCCACAGCCTCAGATTCTGGGACTTACAGCCTCACCTGGTGTAGGA  
GGTGCAACATCCTACTCAAAGCAGAAGAACATATTCTGAAAATTTGTGCCAATCTTGATGC  
ATGTAGAATCATGACTGTTGAAGAGCATGCCTCCCAACTGAAGAATCAGGTGAAGGAACCG  
TATAAGAAGACTGTGATTGCAGATGACAAAAGAAGGGATCCATTTAGAGAGAGAATTACTA  
AGATCATGACAGACATTCAAAGCTATTGCCAGCTCCATCCAAAATCTGAGTTTGGAACTCAG  
CCATATGAACAGTGGGTGATTAGAGAAGAGAGAAGAGCTGCAAAAAGAAGAAAACGCAAG  
GAACGTGTCTGTGCAGAACACTTGAAGAAATACAATGATGCTCTCCAGATAAATGATACCAT

CCGAATGGTGGATGCGTACAATCACCTAAGTAACTTTTATAAGGAGGAGAAAAGTAAGAAG  
ACAGTAAGGAGTGATGATGATGATGAACCAGCAGTATCAAAACAGGATGAAACAGATGAAT  
TTCTAATAAATTTATTTTCATTCAAAAAAGAAACAGCTGAAAAGAGTTGGCTAGAAAGCCAGAA  
TATGAAAATGAGAAGCTAATACAGTTGCGAAACACTTTAATGGAGGAGTTCACGAAGACTG  
AGGAACCTAGAGGAATTATTTTCACAAAGACTCGGCTAAGTGCCTTTGCTCTATTCCAATGG  
ATTAAGGATAACCCAAAATTTGAAGAAGTGGGAATTAAGGCCCATTTATCTTATCGGTGCTG  
GACATAACAGTGAAATTAACCCCATGACTCAGAATGAGCAAAGGGAAGTTATTGATAAATTC  
CGAGGTGGAAATGTAAATTTACTTATTGCTACTACTGTAGCTGAGGAAGGCCTAGACATCA  
AAGAGTGTAACATCGTTATTCGCTATGGCCTCGTCACCAATGAAATTGCTATGGTGCAGGC  
TCGCGGTGCGAGCTCGAGCTGATGAGAGCACCTATGCACTTGTGGCTTCGAGTGGCTCAGG  
AGCTGTTGAACGTGAAGATGTTAATATTTTCCGTGAAAAAATGATGTATAAGGCCATTGAGC  
ATGTCCAGAAGATGCCACGGGAAGAGTATTTAAATAAGATTCAAAATTTCCAGTTGCAAAGT  
ATAGTGGAIAAAAAAAAAATGAAGGCAAAGAGAGATCAGCGCAAGACATACAAGAAAAACCCTT  
CACTAGTAACATTCCTATGCAAAAATTGCCACAAGCTGATATGTTCTGGAGAAGACATACAA  
GTTATTGAAAACATGCATCATGTTAGTGTGAAAAAAGATTTCCAAAGTCTTTACCATACAAG  
AGAAAATAAGACCCTGCAAGATAAGCATGTTGATTACCAGACAAATGGGGAAATTATATGTA  
AAGACTGCGGACAAGCTTGGGGAAATATGATGGTTCACCGAGGTCTTGACCTGCCTTGTCT  
AAAGATTAGAAATTTTGTGGTTGTGTTTGAAGACAAGAAAAACAACAAAGCAAATTTTTAAGA  
AATGGGGGAGAACTGCCTGTTAGGTTCCCTAGTTTTGATTATGCAGCTCATTGGCCTTCAAG  
TGATGAAGAT
